# Supplementary material for: Free circular introns with an unusual branchpoint in neuronal projections
Source: eLife. 2019 Nov 7;8:e47809. doi: 10.7554/eLife.47809 (PMC6879206; doi:10.7554/eLife.47809)
Supplement: Figure 1—source data 1. [file elife-47809-fig1-data1.xlsx]

## Sheet: Sheet1
Table S1: Library specifics and raw read numbers
	Sample name	Replicate #	Cellular fraction	Cell culture platform	Library type	Condition	Date sequenced	Seq method	Seq type	Seq machine	PCR cycles	Mean fragment size	# reads sequenced	# reads after trimming/ filtering	What was trimmed/ filtered	Reads aligned to genome (TopHat)	R1 reads aligned to genome (TopHat)	R2 reads aligned to genome (TopHat)
1	WhCell_rep1	rep1	Whole-cell	Semipermeable membrane with 1 μm holes	Total RNAseq (rRNA depleted)	Resting	2014-10-01	Zhang Z., … Zamore P.D., Silence, 2012	PE 125	HiSeq2500	15	185.32	30723558	21045784	Reads aligning completely to ERCC spike-in, rRNA, repeat elements (catalogued by RepeatMasker), 7sl (or SRP), and mitochondrial genome were removed.	14924912	16322957	15874175
2	WhCell_rep2	rep2	Whole-cell	Semipermeable membrane with 1 μm holes	Total RNAseq (rRNA depleted)	Resting	2014-10-01		PE 125	HiSeq2500	15	194.27	37691664	26072992		19335752	21144396	20507098
3	WhCell_rep3	rep3	Whole-cell	Semipermeable membrane with 1 μm holes	Total RNAseq (rRNA depleted)	Resting	2014-10-01		PE 125	HiSeq2500	15	188.54	36516546	23977346		17184342	18765748	18271898
4	WhCell_rep4	rep4	Whole-cell	Semipermeable membrane with 1 μm holes	Total RNAseq (rRNA depleted)	Resting	2016-06-01		PE 100	HiSeq4000	13	212.28	43410992	34741912		29780341	32207211	31030191
5	WhCell_rep5	rep5	Whole-cell	Semipermeable membrane with 1 μm holes	Total RNAseq (rRNA depleted)	Resting	2016-06-01		PE 100	HiSeq4000	13	215.17	46281721	34944657		29566784	32177461	30970507
6	Proj_rep1	rep1	Projections	Semipermeable membrane with 1 μm holes	Total RNAseq (rRNA depleted)	Resting	2014-10-01		PE 125	HiSeq2500	15	182.45	64057234	16032285		7623256	9568187	8296583
7	Proj_rep2	rep2	Projections	Semipermeable membrane with 1 μm holes	Total RNAseq (rRNA depleted)	Resting	2014-10-01		PE 125	HiSeq2500	15	172.42	62323377	17913692		7230691	8999813	7947058
8	Proj_rep3	rep3	Projections	Semipermeable membrane with 1 μm holes	Total RNAseq (rRNA depleted)	Resting	2014-10-01		PE 125	HiSeq2500	15	154.39	58929210	12967010		5007688	6316197	5726323
9	Proj_rep4	rep4	Projections	Semipermeable membrane with 1 μm holes	Total RNAseq (rRNA depleted)	Resting	2016-06-01		PE 100	HiSeq4000	13	217.94	84655213	16872368		11397253	13718402	12400695
10	Proj_rep5	rep5	Projections	Semipermeable membrane with 1 μm holes	Total RNAseq (rRNA depleted)	Resting	2016-06-01		PE 100	HiSeq4000	13	216.49	81081275	18321398		10905618	14443792	12260808
11	WhCell_PASseq_rep1	rep1	Whole-cell	Semipermeable membrane with 1 μm holes	PolyA site seq (PASseq)	Resting	2015-02-01	Ashar-Patel A, … Moore M.J., Sci Rep, 2017	SE 150	NextSeq500	12	66.2232	11438267	8338738	For each read, the 7nt adaptor from its 5' end and 8(A)s from its 3'end were removed; reads < 25 nt in length or with fastq read quality < 35 were filtered out.	6317374	-	-
12	WhCell_PASseq_rep2	rep2	Whole-cell	Semipermeable membrane with 1 μm holes	PolyA site seq (PASseq)	Resting	2015-02-01		SE 150	NextSeq500	12	66.8661	11555767	8642327		6676543	-	-
13	WhCell_PASseq_rep3	rep3	Whole-cell	Semipermeable membrane with 1 μm holes	PolyA site seq (PASseq)	Resting	2015-02-01		SE 150	NextSeq500	12	67.0753	9134141	7196358		5606091	-	-
14	Proj_PASseq_rep1	rep1	Projections	Semipermeable membrane with 1 μm holes	PolyA site seq (PASseq)	Resting	2015-02-01		SE 150	NextSeq500	14	67.1893	14487027	10711792		8126395	-	-
15	Proj_PASseq_rep2	rep2	Projections	Semipermeable membrane with 1 μm holes	PolyA site seq (PASseq)	Resting	2015-02-01		SE 150	NextSeq500	14	66.9821	15360404	11754736		9147230	-	-
16	Proj_PASseq_rep3	rep3	Projections	Semipermeable membrane with 1 μm holes	PolyA site seq (PASseq)	Resting	2015-02-01		SE 150	NextSeq500	14	66.0294	15323941	11048252		8718547	-	-
17	Cyto_polyARNAseq_rep1	rep1	Cytoplasm	Standard 6 cm culture dish	PolyA+ RNAseq	Resting	2016-07-01	Heyer E.E., … Moore M.J., NAR, 2015	SE 50	HiSeq2500	13	42.8216	43987261	38532713	The adapter was trimmed from each read and reads > 24 nt were retained. Reads aligning completely to rRNA, tRNA, repeat elements (catalogued by RepeatMasker), and mitochondrial genome were removed.	35400985	-	-
18	Cyto_polyARNAseq_rep2	rep2	Cytoplasm	Standard 6 cm culture dish	PolyA+ RNAseq	Resting	2016-07-01		SE 50	HiSeq2500	13	42.8251	42127805	36574716		33614799	-	-
19	Cyto_polyARNAseq_rep3	rep3	Cytoplasm	Standard 6 cm culture dish	PolyA+ RNAseq	Resting	2016-07-01		SE 50	HiSeq2500	13	42.8224	38476594	33730823		31135611	-	-
20	Cyto_riboseq_rep1	rep1	Cytoplasm	Standard 6 cm culture dish	Ribosome profiling	Resting	2016-07-01	Ricci E.P., … Moore M.J., NSMB, 2014	SE 50	HiSeq2500	8	31.7723	98790101	20598475	The adapter was trimmed from each read and reads > 24 nt were retained. Reads aligning completely to rRNA, tRNA, repeat elements (catalogued by RepeatMasker), and mitochondrial genome were removed.	13458606	-	-
21	Cyto_riboseq_rep2	rep2	Cytoplasm	Standard 6 cm culture dish	Ribosome profiling	Resting	2016-07-01		SE 50	HiSeq2500	8	32.499	101652889	16376910		8929761	-	-
22	Cyto_riboseq_rep3	rep3	Cytoplasm	Standard 6 cm culture dish	Ribosome profiling	Resting	2016-07-01		SE 50	HiSeq2500	8	31.7787	87510149	13792183		9069711	-	-

## Sheet: Sheet2
Replicate #	Sample type	Condition	# reads sequenced	# reads after trimming/ filtering	Sample	ercc	rRNA	Repeats	7sl	Mitochondrial	Genome	Unmapped	Repeats+7SL	Mean fragment size
rep1	CB	DIV 14	30723558	21045784	WhCell_rep1	0	52336	221141	2601383	6802914	14924912	6120872	2822524	185.32
rep2	CB	DIV 14	37691664	26072992	WhCell_rep2	0	73967	256649	2500000	8788056	19335752	6737240	2756649	194.27
rep3	CB	DIV 14	36516546	23977346	WhCell_rep3	0	75859	301987	3362926	8798428	17184342	6793004	3664913	188.54
rep4	CB	DIV 14	43410992	34741912	WhCell_rep4	52633	187503	347286	1885607	6196051	29780341	4961571	2232893	212.28
rep5	CB	DIV 14	46281721	34944657	WhCell_rep5	82928	330519	358999	3022402	7542216	29566784	5377873	3381401	215.17
rep1	P	DIV 14	64057234	16032285	Proj_rep1	0	239062	25916	12236860	35523111	7623256	8409029	12262776	182.45
rep2	P	DIV 14	62323377	17913692	Proj_rep2	0	302228	26746	8851640	35229071	7230691	10683001	8878386	172.42
rep3	P	DIV 14	58929210	12967010	Proj_rep3	0	152302	21759	8752584	37035555	5007688	7959322	8774343	154.39
rep4	P	DIV 14	84655213	16872368	Proj_rep4	109360	413102	44005	8438436	58777942	11397253	5475115	8482441	217.94
rep5	P	DIV 14	81081275	18321398	Proj_rep5	183943	536752	58975	14536430	47443777	10905618	7415780	14595405	216.49
Sample (sum)	rRNA	Repeats	Mitochondrial genome	Nuclear genome	Unmapped
Whole Cells	720184	14858380	38127665	110792131	29990560
Projections	1643446	52993351	214009456	42164506	39942247
Percentages
Whole Cells	0.00370038	0.0763438	0.195904	0.569261	0.154094
Projections	0.00468156	0.150958	0.609633	0.120111	0.113781
