# Supplementary material for: Free circular introns with an unusual branchpoint in neuronal projections
Source: eLife. 2019 Nov 7;8:e47809. doi: 10.7554/eLife.47809 (PMC6879206; doi:10.7554/eLife.47809)
Supplement: Figure 2—source data 1. [file elife-47809-fig2-data1.tds]

# The results of differential gene expression analysis between whole cell versus projections by Sleuth (0.30.0).
# These data were generated by SuppCode_sleuth_RNA_diffexp.Rmd and underlie Figure 2A.
# There are 41,032 rows (annotated gene isoforms) and 20 columns (observations for each isoform). 
# cb is an abbreviation for Cell Body or whole cell data; p refers to Projections data; TPM = Transcripts per million
#
# The variables are explained below:
# ens_geneid	Ensembl gene ID
# ext_geneid	Gene name
# target_id	Ensembl transcript ID
# pval	p-value
# qval	Benjamini-Hochberg false discovery rate adjusted p-value 
# b		Beta = biased estimator of natural log fold difference in gene expression
# se_b		The standard error of b
# mean_obs	Average of natural log of estimated read counts (from Kallisto)	
# cbr1_tpm	Isoform abundance in TPM for whole cell replicate 1
# cbr2_tpm	Isoform abundance in TPM for whole cell replicate 2	
# cbr3_tpm	Isoform abundance in TPM for whole cell replicate 3
# cbr4_tpm	Isoform abundance in TPM for whole cell replicate 4
# cbr5_tpm	Isoform abundance in TPM for whole cell replicate 5
# pr1_tpm	Isoform abundance in TPM for projection replicate 1
# pr2_tpm	Isoform abundance in TPM for projection replicate 2
# pr3_tpm	Isoform abundance in TPM for projection replicate 3
# pr4_tpm	Isoform abundance in TPM for projection replicate 4
# pr5_tpm	Isoform abundance in TPM for projection replicate 5
# mean_cb_tpm	Averaged TPM values of five whole cell replicates
# mean_p_tpm	Averaged TPM values of five projection replicates
#
"ens_geneid"	"ext_geneid"	"target_id"	"pval"	"qval"	"b"	"se_b"	"mean_obs"	"cbr1_tpm"	"cbr2_tpm"	"cbr3_tpm"	"cbr4_tpm"	"cbr5_tpm"	"pr1_tpm"	"pr2_tpm"	"pr3_tpm"	"pr4_tpm"	"pr5_tpm"	"mean_cb_tpm"	"mean_p_tpm"
"ENSRNOG00000062127"	"Malat1"	"ENSRNOT00000093096.1"	5.65694350536592e-84	1.12103649445836e-79	-3.28813143874441	0.169351992895635	7.76730669000305	333.508967738113	316.542163505453	275.470429639137	212.129307908182	206.452132453816	9.56618553411348	11.2968613792163	5.4361217905868	8.26715936031605	10.4997546976126	268.82060024894	9.01321655236905
"ENSRNOG00000004196"	"LOC108352650"	"ENSRNOT00000005577.7"	5.69661820350434e-47	3.76299609796152e-43	2.4036866949223	0.16699977903793	7.69777832458973	269.287911525799	284.65110051056	267.098477275741	242.430670233994	278.008347162777	2189.24483192044	2745.39376075172	2067.98331549328	3044.95235692267	2275.81460734977	268.295301341774	2464.67777448758
"ENSRNOG00000043348"	"LOC103694404"	"ENSRNOT00000092456.1"	6.11207514791702e-41	2.42245986412543e-37	2.19840610975777	0.164069987689722	7.18321540203709	144.70384978486	135.684535934276	137.008052360266	108.905027123868	108.64793814108	979.371496938598	1033.98174040461	899.940612344623	1110.31443886455	764.558455559602	126.98988066887	957.633348822397
"ENSRNOG00000011375"	"Tsc2"	"ENSRNOT00000052138.6"	9.46947641061073e-41	3.12761023381788e-37	2.69654238501022	0.201736393990913	7.61975250517938	4.38419367160081	3.69607625703149	3.68954070971522	4.45958248097892	6.86572829032427	34.6956983820445	67.2972746938486	48.9157602401384	85.7467762922542	75.9007317124282	4.61902428193014	62.5112482641428
"ENSRNOG00000020843"	"LOC100360087"	"ENSRNOT00000028315.6"	2.37843365761856e-37	5.89167747412839e-34	2.11069057888098	0.165271161668739	7.47356003150811	77.1401130577933	101.141965640593	72.3098360762286	65.8619822346089	89.6541251629953	540.614191234306	677.718579941161	461.982504241713	567.919514116621	648.452402568299	81.2216044344438	579.33743842042
"ENSRNOG00000042233"	"Rpl41"	"ENSRNOT00000066159.3"	2.32151454589945e-37	5.89167747412839e-34	2.27872686611618	0.178402395104807	8.43973440166828	306.419430404038	322.100673115743	296.16629029796	216.629569948915	271.872390820111	2398.87385762903	2775.94693598622	2420.24391240549	2471.45549013704	1735.019138581	282.637670917353	2360.30786694776
"ENSRNOG00000008810"	"Nsmf"	"ENSRNOT00000048137.5"	6.86309883457778e-35	1.51117810672031e-31	2.04117782937984	0.165647904066174	7.19770135028202	14.1634996703703	17.7518653774283	19.3006767455214	15.7676232554033	13.4313931795932	89.136081530342	114.276776148855	140.396755314057	121.164777498955	88.5075319793632	16.0830116456633	110.696384494314
"ENSRNOG00000014179"	"Rps2"	"ENSRNOT00000019508.6"	1.55564414947182e-34	3.08282001100831e-31	2.54282258866798	0.207471783640998	9.40536029560541	244.721024584499	317.879603314055	215.222163960145	180.724071168435	218.486312175116	2107.88338662479	3380.71177507626	2089.54624628728	2776.48297910662	2809.93164273942	235.40663504045	2632.91120596687
"ENSRNOG00000051719"	"AABR07065498.1"	"ENSRNOT00000079807.1"	2.35733086073663e-34	4.2468386970198e-31	2.03479272609898	0.166479307692248	6.50084582784593	9.88699569748349	9.86511224786822	12.6116457020018	9.06161454795041	9.80432142307193	52.1477202769442	53.7310729319958	74.5695996569304	77.2239737631921	97.3718540122035	10.2459379236752	71.0088441282532
"ENSRNOG00000018645"	"Rpsa"	"ENSRNOT00000025225.5"	1.44816537863088e-32	2.39152444236067e-29	2.34706927135985	0.197512486606448	9.13437971184881	155.171593115616	190.531199057684	137.67244107297	158.517131935354	175.168875382874	1061.21782431854	1611.52710573802	983.533815282623	2524.43105216564	1781.4541129587	163.4122481129	1592.4327820927
"ENSRNOG00000008810"	"Nsmf"	"ENSRNOT00000048353.5"	1.44844282502728e-31	2.20798395873582e-28	1.95133218173873	0.166935465517803	6.8971695822571	11.7040801467854	11.0366375970692	17.7016337489782	9.30982032975266	17.2844531018154	69.8573469199201	72.1087239704157	99.3380244220092	75.0015543946583	93.3172610180402	13.4073249848802	81.9245821450087
"ENSRNOG00000014366"	"Shc3"	"ENSRNOT00000019442.3"	1.85613890259008e-31	2.62736461661626e-28	1.96507448145082	0.168414883973294	7.83872502506438	26.3548836772601	19.0776490716547	31.7760208049655	19.0518606880137	31.3619512229134	142.152525733471	138.078793331409	169.124007985523	147.940507360697	199.304523913927	25.5244730929615	159.320071665005
"ENSRNOG00000023344"	"Rpl23a"	"ENSRNOT00000035657.3"	3.49835786324973e-31	4.62179718506799e-28	1.96948082664111	0.169578088578036	7.92841429163587	123.466756811264	154.31839421575	143.389015206807	113.536702931469	126.048012776444	715.105734072849	884.991555610505	652.058652508956	1215.42347033449	723.224566798123	132.151776388347	838.160795864985
"ENSRNOG00000039249"	"AABR07035539.1"	"ENSRNOT00000045401.4"	8.40076700226092e-31	1.04048749802378e-27	2.09595153219137	0.181642476180157	5.95960660015104	32.8081357564184	22.2760129450059	32.740101036465	23.9600327613341	23.1044379158088	154.457753042541	189.120191691357	140.256425678793	283.98426064509	184.411365091694	26.9777440830064	190.445999229895
"ENSRNOG00000028426"	"Mcf2l"	"ENSRNOT00000087095.1"	1.34423930066365e-30	1.56698766007362e-27	1.98782750280765	0.17287900959361	8.1374668321744	10.3862947705604	11.0642753614093	10.7277925235186	13.1642720239991	11.5884875797075	57.0526506443444	75.1228010605506	58.965271605107	101.381921312562	85.8853087572999	11.386224451839	75.6815906759728
"ENSRNOG00000000033"	"Tmcc2"	"ENSRNOT00000000036.5"	1.5670779557741e-30	1.72526576942085e-27	1.98503217806783	0.172835045081978	8.14896069860055	15.3613870594757	16.753506636046	15.3173818961471	16.4791711360966	22.3602709317045	78.347550953963	101.914538437151	91.3956100975576	135.888026440513	168.192498204603	17.254343531894	115.147644826757
"ENSRNOG00000010311"	"Dzip1"	"ENSRNOT00000093327.1"	1.07953389781597e-29	1.12595385542206e-26	2.01763038194676	0.178281164895987	5.84364285050166	22.0665520739087	23.3009785946524	17.8592197027397	27.0597948896678	35.5007927590708	100.011946133954	153.949154585825	119.227994670708	239.46198748696	220.238160941415	25.1574676040079	166.577848763772
"ENSRNOG00000019974"	"Uba52"	"ENSRNOT00000027073.6"	1.37952584504429e-29	1.36690318356213e-26	1.98228157582691	0.175491421326543	8.29827036497774	220.276875879528	256.661392024881	196.887920376046	230.582933473892	229.246309829253	1276.59764497981	1734.82652512999	1210.32737920468	1943.43043907488	1080.38952927632	226.73108631672	1449.11430353314
"ENSRNOG00000042886"	"Rps28"	"ENSRNOT00000068323.1"	4.91373714058661e-29	4.63692994833356e-26	2.1378459106789	0.191161441216836	5.45090162659103	29.0047796065936	29.4373538279575	22.8009408391048	20.3330045402724	27.1717410752716	176.119269493671	198.579932582941	151.880368146309	196.03451861969	185.354114150918	25.74956397784	181.593640598706
"ENSRNOG00000030747"	"Rpl38"	"ENSRNOT00000042661.2"	2.36381186434043e-28	2.12925725980156e-25	2.05177428457657	0.185794768299595	6.91821743198181	194.457568300291	188.139452490775	161.332603787599	106.64326530022	115.153454957606	1082.23099539199	1003.94517621088	817.363216285466	1053.2206030703	831.284275439322	153.145268967298	957.608853279592
"ENSRNOG00000042903"	"Cox7a2l2"	"ENSRNOT00000066084.1"	6.83788810612999e-28	5.89158385213818e-25	1.81042469354236	0.165374786863305	6.63820293013353	51.3686295757759	59.7060555092647	47.1419234100372	41.5944648526227	57.802781329662	265.237352185803	275.172557138743	356.731723827859	281.261417543578	189.678983129624	51.5227709354725	273.616406765121
"ENSRNOG00000010637"	"Tbc1d5"	"ENSRNOT00000083387.1"	2.43019662399139e-27	2.00663360406823e-24	1.97323170147127	0.182168318956364	5.93034475970905	2.77404581677591	2.42260381951016	3.63236011486903	2.07248258209959	2.24230971525178	14.759416434228	13.3133593172405	19.1485990742363	16.4488863809876	20.007622563373	2.62876040970129	16.7355767540131
"ENSRNOG00000029512"	"LOC100361854"	"ENSRNOT00000051134.1"	2.82251998001804e-27	2.2373551377607e-24	1.80704599576277	0.167037511892489	7.71340376888887	270.249717350944	336.007180047091	256.219002227246	237.316706587847	284.688388157726	1346.12533020435	1734.08199045758	1157.3588904314	1747.41938773172	1126.00854616299	276.896198874171	1422.19882899761
"ENSRNOG00000055530"	"Panx2"	"ENSRNOT00000089707.1"	3.95022539941894e-27	3.01083141308789e-24	2.05430408367062	0.190436425973651	6.6670877704617	3.87569993846507	4.48432912245767	3.87363330316046	5.16927703803271	7.30667446952254	22.4461583011646	32.3364101306398	27.6800336605025	37.8512118236301	54.402768428887	4.94192277432769	34.9433164689648
"ENSRNOG00000055758"	"AABR07009338.1"	"ENSRNOT00000091883.1"	1.07253029244728e-26	7.87197511312141e-24	2.83754180909335	0.265311232156923	4.41172507363932	4.18923280730291	6.57921350112418	6.69093026501369	3.07080695787001	3.81253820341634	72.4438925932639	80.0257516595601	76.7141184786462	56.311516691249	60.5660992548573	4.86854434694543	69.2122757355153
"ENSRNOG00000052226"	"LOC108348144"	"ENSRNOT00000081761.2"	1.34912870332593e-26	9.54845839778929e-24	1.9683150328628	0.184405291311489	5.66453674623751	20.0391971964101	23.2019509722882	21.6590466877438	22.1688278154434	20.6683031348266	135.683676758403	120.114436084914	178.715725258157	141.63536630741	95.5517861535683	21.5474651613424	134.34019811249
"ENSRNOG00000024603"	"Rps15"	"ENSRNOT00000029791.4"	1.54227204710288e-26	1.05390362611854e-23	1.79576161452881	0.168435526386683	7.83721280421683	131.52521948491	144.997232142073	128.269420389585	119.514422912385	154.536423871098	669.86034172518	893.454537450811	557.886523410103	875.381192070556	597.99540061954	135.76854376001	718.915599055238
"ENSRNOG00000059061"	"Uqcr10"	"ENSRNOT00000083839.1"	3.59532891860718e-26	2.37495443933462e-23	1.78968417598328	0.169118541904196	6.26982664838533	39.5301885475068	44.6173111701317	40.9974644039249	51.2390758683151	61.9628169682466	190.57131319243	189.720600294203	245.000844998196	327.192600606176	268.683003923828	47.669371391625	244.233672602967
"ENSRNOG00000011138"	"Rpl29"	"ENSRNOT00000014849.4"	6.9446223392658e-26	4.43940583539453e-23	1.77283677821309	0.168511347380584	7.84705528724481	101.977243746041	109.655745842179	88.1437102946541	127.595653364019	147.804096763023	454.512269935481	603.423846939585	427.000471854165	860.025016326758	656.620468616188	115.035290001983	600.316414734435
"ENSRNOG00000001148"	"Rplp0"	"ENSRNOT00000001518.6"	8.27389760652596e-26	5.1238696521414e-23	2.18451648872897	0.207968683783349	9.41868090904373	222.367779595567	284.964099713304	183.524236415349	193.431635261225	200.571913649967	1355.59066049696	1998.57972029174	1309.77663246507	2321.22311746362	1634.20027880661	216.971932927082	1723.8740819048
"ENSRNOG00000015385"	"Pink1"	"ENSRNOT00000083474.1"	9.13940397448843e-26	5.46232093487315e-23	1.7232283879095	0.164200300522543	6.89941981455354	9.42359592045134	10.3406533244423	10.1523159597635	10.4236775849	13.3371167406162	56.078086717255	80.3082922890097	38.467832017219	57.2781893000723	42.5547921442306	10.7354719060347	54.9374384935573
"ENSRNOG00000008551"	"LOC100362830"	"ENSRNOT00000092867.1"	9.37169661329601e-26	5.46232093487315e-23	1.7604723778702	0.167787050244756	7.42940990325735	58.4931672246689	75.3636059909952	58.0430244908741	66.9879618987697	64.7089020362224	323.994144214235	379.780354049415	262.759029400006	466.879319123707	250.744689186981	64.7193323283061	336.831507194869
"ENSRNOG00000028426"	"Mcf2l"	"ENSRNOT00000023352.6"	3.55222983782766e-25	2.01127253417802e-22	1.83551383234631	0.177076066499349	6.95787920977919	5.57778994773873	5.86239185922084	5.75444935145805	3.30896081975632	2.93622459262909	26.697258099806	34.6535934763102	26.7119418023054	19.8789938760652	20.3647275655416	4.68796331416061	25.6613029640057
"ENSRNOG00000010311"	"Dzip1"	"ENSRNOT00000093385.1"	3.66468960913321e-25	2.01730983289425e-22	1.91612554111309	0.184906014601953	6.8049257012145	3.19087349721806	5.07098718784659	4.97718990134179	5.95034658603455	5.49034845996127	22.2996741398913	23.4647888959824	24.8221498986215	47.5435622850456	34.8007127432977	4.93594912648045	30.5861775925677
"ENSRNOG00000061450"	"Homer2"	"ENSRNOT00000087785.1"	5.67409622233906e-25	3.03901526589441e-22	1.75998880625458	0.170528125778362	6.16002285974397	4.24701686523963	5.44040334975088	5.07961784292455	6.17512261232892	4.69766106443419	17.3342725652948	29.2286838252155	22.5869755943661	42.6154954662035	25.8912640788146	5.12796434693563	27.5313383059789
"ENSRNOG00000052025"	"Aes"	"ENSRNOT00000092061.1"	6.4711491122903e-25	3.37470426205939e-22	1.69782190960818	0.164706184216084	7.39216230372768	76.3879779892764	74.2518868315598	75.2003288871986	94.3352444904552	103.109291113644	325.351493761598	352.517219532645	377.852904730486	585.12464370857	393.835511250258	84.6569458624268	406.936354596711
"ENSRNOG00000023385"	"Rpl37a"	"ENSRNOT00000030761.4"	9.99457253498569e-25	5.07852420322593e-22	2.02607588915306	0.197351737931651	6.96440448964783	16.02369432313	17.1378071912368	13.3005759890856	23.5840161503913	14.7647258532614	91.4306272380024	124.227528893972	88.9398157054701	209.035424154757	82.5340236771665	16.962163901421	119.233483933874
"ENSRNOG00000018795"	"Rpl18a"	"ENSRNOT00000025421.6"	2.00267752409553e-24	9.67977085243931e-22	1.73096087147302	0.169718228094675	7.94454860839434	108.202826966444	100.150507977842	101.646138531779	133.422872347631	160.033592815176	501.995865227029	609.397362534049	413.477340583349	896.972639319096	603.555889064924	120.691187727774	605.079819345689
"ENSRNOG00000016387"	"Rpl34"	"ENSRNOT00000009046.8"	1.96364435390515e-24	9.67977085243931e-22	1.72216176497337	0.168823844656385	6.26808296954273	68.3907847725099	87.8129303250927	61.0192353401491	50.2443043951896	63.5967159466117	284.454325068911	419.680571913399	228.731768136749	362.236144762456	265.670463760652	66.2127941559106	312.154654728433
"ENSRNOG00000059277"	"SNORD113"	"ENSRNOT00000089231.1"	2.5535680258831e-24	1.20485851354584e-21	-2.60900427171776	0.256403194447748	5.39280243667442	1366.04775892175	1002.03829214672	1495.17274718283	710.545672850007	493.697010160856	82.6246551713301	83.1965079363847	60.564124814895	62.4675044461698	41.1592057449573	1013.50029625243	66.0023996227474
"ENSRNOG00000052296"	"Shank3"	"ENSRNOT00000092388.1"	3.52285199803467e-24	1.62354321035007e-21	2.37998729319236	0.234619663199307	7.02464902379392	3.0868713702341	2.58249333411211	3.12627201286722	4.34339098327349	3.83016162248034	18.1458951309276	29.7531375781661	23.5859922552838	54.7094280726292	49.676740977992	3.39383786459345	35.1742388029997
"ENSRNOG11111111111"	"Xist"	"ENSRNOT11111111111.1"	3.62122371403255e-24	1.63094978047689e-21	-3.11900232798101	0.307553473962963	7.09807993455234	12.2109263376383	14.7839298246922	26.7638640708181	35.6272080624224	26.2241995173012	0.355166203419231	0.805132273615816	1.01822712730674	1.25634821328948	1.16772260699222	23.1220255625744	0.920519284924697
"ENSRNOG00000031364"	"Kif1c"	"ENSRNOT00000041493.3"	4.20850062085218e-24	1.85333015118728e-21	2.28103976116823	0.225251323742382	7.27896361919633	6.93520591674512	8.43761580810833	4.96395256540131	4.54825936163186	3.90698671518296	53.8594714497403	91.0233696945636	43.2361603567562	39.6236132056792	31.1529217324392	5.75840407341392	51.7791072878357
"ENSRNOG00000046256"	"Ralgapa1"	"ENSRNOT00000083857.1"	1.15553200292729e-23	4.97808210913263e-21	6.10597710489218	0.608931051263832	3.28915053797166	0	0	0.214782451696558	0.047893257831094	0	10.2987571889604	10.3548547322977	12.4181035647823	12.4989321512248	11.8495235393342	0.0525351419055304	11.4840342353199
"ENSRNOG00000017940"	"Rere"	"ENSRNOT00000024443.3"	2.18977789768064e-23	9.23294225496536e-21	1.65680693171455	0.166278621112775	7.63236672442587	4.80207325579006	4.57954650545014	4.84126005102978	6.51916460962309	7.92917774358068	24.1239088425616	27.9594316612268	30.933990855658	24.947307838437	23.7237428692316	5.73424443309475	26.337676413423
"ENSRNOG00000010311"	"Dzip1"	"ENSRNOT00000038596.6"	2.23647611913356e-23	9.23338484434787e-21	1.98733692677314	0.199492895799098	6.8095108084623	8.47375270374159	7.74657231603083	6.37052297947035	4.24832768444709	4.81841089931484	40.1458756067906	53.247911541226	56.3337710883248	24.3971645266033	33.8283965951969	6.33151731660094	41.5906238716283
"ENSRNOG00000037607"	"LOC100911575"	"ENSRNOT00000057030.2"	2.65512229744554e-23	1.05233117136957e-20	1.90337228040343	0.191392314648457	5.40442473743169	21.6700829203806	21.8618922901168	19.3792856268636	32.7670863782593	38.7166771859797	92.208714403052	141.712471139004	96.8905093597751	230.764760152678	223.290418413639	26.87900488032	156.97337469363
"ENSRNOG00000002116"	"Rplp2"	"ENSRNOT00000038691.5"	2.65512229744554e-23	1.05233117136957e-20	1.90337228040343	0.191392314648457	5.40442473743169	21.6700829203806	21.8618922901168	19.3792856268636	32.7670863782593	38.7166771859797	92.208714403052	141.712471139004	96.8905093597751	230.764760152678	223.290418413639	26.87900488032	156.97337469363
"ENSRNOG00000052157"	"Nav3"	"ENSRNOT00000082100.1"	6.0277472152224e-23	2.34219346204044e-20	1.83362384493589	0.185911065183302	8.32046729771968	10.1616384574758	11.0269573113607	11.2885015352317	12.2450988231654	13.5520408102769	42.010300827977	66.2064118569223	45.4788683731515	101.91027990422	88.2718085638084	11.6548473875021	68.7755339052158
"ENSRNOG00000000490"	"Rps10"	"ENSRNOT00000033907.5"	1.6732456197978e-22	6.37667470144865e-20	1.68039929109234	0.172173870043368	6.12378597488068	35.7249832176137	41.6838532261414	32.6219021286943	28.2993916152349	33.7211987464607	161.538163621003	233.66181197033	154.400531966484	162.126613887791	101.666952565593	34.410265786829	162.67881480224
"ENSRNOG00000049758"	"Tbc1d16"	"ENSRNOT00000075171.2"	1.96384795634001e-22	7.34293866996038e-20	1.63865195317109	0.168176515989834	6.33818068770021	3.74318009385129	4.82298623156662	4.96387110961734	5.24045048954895	5.41124776737118	16.3477325540347	22.8014920810074	18.6006777446687	32.023851786519	23.2522640002104	4.83634713839108	22.605203633288
"ENSRNOG00000002125"	"Ccni"	"ENSRNOT00000002924.5"	2.05480225783156e-22	7.5407437673052e-20	1.80001964002753	0.184825103916767	8.71176944230973	48.2734707345053	53.6563193115868	43.8946065802369	46.3082472685214	40.5355307441822	195.478798688925	216.588101746676	265.048142343702	346.683877866964	248.070360019797	46.5336349278065	254.373856133213
"ENSRNOG00000015277"	"Serf2"	"ENSRNOT00000056151.4"	3.13659621743954e-22	1.13014413165453e-19	1.6854341192362	0.173828410920134	7.02131784566123	79.0521803725677	84.5426661740119	64.1010835384081	54.9821286172587	49.8980431323493	378.020962348825	381.576233566581	270.539782021697	327.855787475602	204.053777543832	66.5152203669191	312.409308591307
"ENSRNOG00000001628"	"Pcp4"	"ENSRNOT00000061047.3"	5.56639651125828e-22	1.96980856542152e-19	1.60450982384326	0.166490579014713	7.65892539141957	123.766475328801	148.138998989714	143.759130048646	141.117386372775	119.340941215524	521.495163721024	531.650040820397	650.833016797246	850.635384170859	424.066695531794	135.224586391092	595.736060208264
"ENSRNOG00000018526"	"Dlg4"	"ENSRNOT00000089108.1"	5.9777341671593e-22	2.07825891211572e-19	1.58600189514409	0.164695270099647	7.17140751834212	11.8981166013986	13.0107305957131	13.6213913919018	10.669279123569	11.9969178850454	41.1059107891538	40.8399317889002	53.5814837652055	78.4155138666316	59.3693897619097	12.2392871195256	54.6624459943602
"ENSRNOG00000018681"	"Nes"	"ENSRNOT00000025384.6"	8.22550995952634e-22	2.81042984255058e-19	1.93614303302039	0.201743293562366	7.34184698934283	6.3354014326194	8.37915489167864	4.99338586171111	6.55803825484803	3.67356669036669	30.8720122183845	52.1306048660189	23.6103889253522	47.6166540438007	31.9279801093781	5.98790942624477	37.2315280325869
"ENSRNOG00000029466"	"RGD1562608"	"ENSRNOT00000045150.4"	1.30635380288827e-21	4.38779886641302e-19	1.75650604618638	0.183941731444741	5.64274331189808	2.42577516963466	3.30498169218574	1.95777145786964	1.87151110252714	2.04706052978614	7.87321145050612	13.7773027635212	10.7973985222555	13.5204448147262	14.0430951404249	2.32141999040066	12.0022905382868
"ENSRNOG00000011841"	"Map2"	"ENSRNOT00000092376.1"	1.35076228433714e-21	4.46134269811817e-19	2.02113837621424	0.211730900664656	7.65565390910504	56.7124721447529	79.4242075084413	64.2613700701135	97.0414544989433	86.7607138022436	324.737567227536	577.137672171958	312.857846960472	948.716472708676	546.381480163138	76.8400436048989	541.966207846356
"ENSRNOG00000019578"	"Rps16"	"ENSRNOT00000026576.7"	1.43926027317969e-21	4.67570833337736e-19	1.56669233563555	0.164237134856845	6.86274994414402	30.8513279732729	36.4261426195745	29.1730303395388	31.7094917218206	39.4026761812668	139.461874854426	161.02919689477	119.50940062055	142.076984075429	142.311672854834	33.5125337670947	140.877825860002
"ENSRNOG00000018784"	"Jph3"	"ENSRNOT00000025392.5"	2.42147833326912e-21	7.73974776296681e-19	1.56965446185309	0.165486315520855	7.52680418681441	9.23666537989744	12.4732321536778	11.5707642346345	12.5230637088741	12.2010367910842	36.3971164583385	45.8641841303574	45.3969307827074	64.8224469585635	59.6863786701001	11.6009524536336	50.4334114000134
"ENSRNOG00000024309"	"Cox6b1"	"ENSRNOT00000032026.3"	3.57696285023102e-21	1.125153536556e-18	1.55475070707034	0.164622714230632	6.77881475887671	53.7035183310507	45.9980758621427	41.2696615081151	43.9402131894694	48.3180285944845	186.638297248613	180.072164174954	258.140578104016	229.77066514317	128.963471396599	46.6458994970525	196.71703521347
"ENSRNOG00000009590"	"Stox2"	"ENSRNOT00000090839.1"	5.32726045933714e-21	1.64953625816694e-18	1.62766087252551	0.173109039627289	6.52006140918527	3.96772525034263	4.1683279996537	4.15955681804932	4.60708721038284	4.72495894172243	14.9544079121983	26.6326628713875	14.7829567680987	20.3642539824884	24.1122129099823	4.32553124403018	20.169298888831
"ENSRNOG00000054626"	"Rps8"	"ENSRNOT00000081747.1"	1.08850751659805e-20	3.31860822406516e-18	1.533606140288	0.164425504011329	7.34213721153884	72.4254343468597	73.8947917601016	65.4370820093012	60.5559579854083	62.6674583118724	278.004527557032	348.487525624509	224.459111134456	297.07500122736	225.507239179708	66.9961448827086	274.706680944613
"ENSRNOG00000057284"	"Cenpb"	"ENSRNOT00000080351.1"	1.4261314673351e-20	4.2820677709363e-18	1.52510515397031	0.164018522108152	6.86853740821505	9.22382562126827	10.6364359481779	9.66919287556636	12.0869287080376	16.0199831998096	45.5835216846074	52.4676276968815	32.7606046794197	61.3281502850572	43.5753745832358	11.5272732705719	47.1430557858403
"ENSRNOG00000001516"	"Rapgef4"	"ENSRNOT00000010630.7"	1.46205684270336e-20	4.32441499281379e-18	1.52950340555325	0.164538357919431	7.37180436214302	12.7231439326868	11.7786088521346	16.6397190253451	9.31409512785011	11.2087390798792	33.3825735959542	43.4817468041172	60.5687563000657	63.1688327448286	55.05595551124	12.3328612035792	51.1315729912411
"ENSRNOG00000008810"	"Nsmf"	"ENSRNOT00000042100.4"	1.79333088323133e-20	5.22624089896989e-18	2.10677566312098	0.227170701556066	8.5802515200971	25.0254626271889	24.0441817652964	31.0589620410197	43.6629840390438	47.1344485765019	143.459068636169	188.804308954502	239.71358699919	361.588659601274	343.948040051792	34.1852078098101	255.502732848585
"ENSRNOG00000020982"	"LOC687780"	"ENSRNOT00000028481.6"	1.95035151663086e-20	5.60146608769184e-18	1.51778567396547	0.163818876828173	7.04701241480381	78.1693116312023	80.9649169584985	68.8537224327547	47.8460484799415	63.3204021542297	283.794445648409	317.062250152158	256.085051211726	271.653867349713	205.591137384322	67.8308803313253	266.837350349266
"ENSRNOG00000012163"	"Plekhm2"	"ENSRNOT00000016333.7"	2.63346594110254e-20	7.45534207926128e-18	1.53640805660583	0.166405388435601	6.50280071838181	5.08162932621497	4.0936098256544	4.26223473100485	3.48284963038719	4.20543281532427	17.8019649507897	18.1801899932782	21.8381743055546	14.4328453810063	15.5826625177211	4.22515126571714	17.56716742967
"ENSRNOG00000046984"	"St6galnac6"	"ENSRNOT00000074401.2"	3.57984030419466e-20	9.85301323725356e-18	1.50709728816184	0.163815105788951	7.07308415763158	12.1867337937506	12.1011001596691	11.9972310779328	11.9472369168926	10.336797075245	42.4069000120927	49.6806858370154	47.2084591549901	59.9444322350447	38.3153226417609	11.713819804698	47.5111599761808
"ENSRNOG00000038225"	"Fbxo15"	"ENSRNOT00000058199.4"	3.53676211258155e-20	9.85301323725356e-18	2.04663161315757	0.222428756834263	4.86264658100212	2.10239200206909	1.96240414673435	1.7988153794231	1.34844100375414	1.05780514336768	8.97647370431442	12.7910479052521	13.3283901307806	9.2316507252859	11.9899017163662	1.65397153506967	11.2634928363998
"ENSRNOG00000049912"	"Atp5f1e"	"ENSRNOT00000071913.2"	4.25601858133394e-20	1.15536329077116e-17	1.83207141155423	0.199542053603067	6.80316398676459	89.8739132429573	101.539255334542	99.0757515257386	73.9293942032658	107.251016732074	506.172642424486	583.149887395735	628.574559578566	537.031767468616	286.932513305891	94.3338662077155	508.372274034659
"ENSRNOG00000029627"	"LOC100359951"	"ENSRNOT00000041813.5"	6.22447252768641e-20	1.6668969200157e-17	1.97995231668008	0.216616445977309	7.60501523267566	155.534859581525	146.696443889671	129.716901390194	83.6318763099392	75.7722291378926	812.316255720509	917.154091916593	755.387049328599	673.308303513538	468.340455411268	118.270462061844	725.301231178101
"ENSRNOG00000010746"	"Rpl32"	"ENSRNOT00000014493.5"	6.94640990023596e-20	1.83542673323968e-17	2.14705011465606	0.235203317103675	7.6826081038396	135.154583781913	152.267415990115	104.932771714597	68.9688104584911	68.0282002833315	929.343153658396	1050.92099536127	744.464116631207	595.820095728842	521.760677668718	105.87035644569	768.461807809687
"ENSRNOG00000028149"	"Kansl1l"	"ENSRNOT00000067589.3"	7.50944705326341e-20	1.93265860070807e-17	1.56367695243132	0.171454996213409	6.10173339462061	4.18649963628201	3.95015995668411	3.20879114904471	2.35355657014733	3.69201448742111	13.2973056088072	16.9696690829759	13.84367909069	14.4177669752332	14.3632342186674	3.47820435991585	14.5783309952747
"ENSRNOG00000005726"	"Pclo"	"ENSRNOT00000008637.8"	7.42712873820604e-20	1.93265860070807e-17	-6.5013195327695	0.712767262222735	2.5575136037845	1.69723211122451	1.7668470761905	2.07740443953327	2.70544532417048	0.387256486490624	0	0	0	9.65329189075245e-09	0	1.72683708752188	1.93065837815049e-09
"ENSRNOG00000040205"	"Zcchc24"	"ENSRNOT00000061883.2"	7.72806025291909e-20	1.9634226927192e-17	1.84173533815595	0.202012608205534	6.5364905700179	3.45452914590099	4.82862678106972	2.37127417619084	3.11692839801472	2.00767574505871	17.9652204545201	25.7650860084338	11.6494623479747	18.760848632692	13.8466087173722	3.155806849247	17.5974452321986
"ENSRNOG00000036827"	"Ppp1r1a"	"ENSRNOT00000055271.2"	7.84404878753791e-20	1.96766474459036e-17	1.49699159801504	0.16422813637558	6.80296446231656	13.5715082094926	13.1917972398458	16.5981974797033	11.7959262540847	19.0304387395508	54.6521963992609	50.6583217419075	66.8322386761614	57.3218338397081	61.6931993248674	14.8375735845354	58.2315579963811
"ENSRNOG00000000054"	"Abhd8"	"ENSRNOT00000000060.6"	1.05635176726341e-19	2.61671537148238e-17	1.48911997017983	0.163946063085035	7.19347677901954	17.0955486632103	17.3025511435744	17.6607574062159	14.3167444803528	15.3375881259975	63.9221024461963	74.0575223265114	62.9848812082825	64.7765037698536	56.4410984816128	16.3426379638702	64.4364216464913
"ENSRNOG00000032215"	"Cdyl"	"ENSRNOT00000048757.3"	1.39105047325653e-19	3.40326508994132e-17	2.12700626058682	0.234950671282588	5.98648617217699	4.26150180171108	4.81668544464604	3.75852071928705	2.60937907475059	1.66609993480044	24.9912089276924	30.6354766201463	25.7573162613165	27.9047496284391	14.3016746534034	3.42243739503904	24.7180852181995
"ENSRNOG00000008277"	"Bag1"	"ENSRNOT00000011455.6"	1.80787689693356e-19	4.36910932518688e-17	1.53704338120165	0.170322038978766	6.16330076065486	10.0312660988381	9.69977696819905	8.87638966287015	8.82626864395436	8.58880417631691	40.0449127346034	38.3103149964616	39.0880792233676	48.4333205714394	26.9152754421223	9.20450111003571	38.5583805935989
"ENSRNOG00000052376"	"Bend6"	"ENSRNOT00000088824.1"	2.54065656202302e-19	6.03721846477741e-17	1.47925732594685	0.164599640788616	7.36861981351479	22.3118549668962	20.4478695360975	21.1364132323514	24.179233940534	24.7868805182989	65.3505771344184	67.6803607475765	94.5932763896637	124.316494995889	100.029520117015	22.5724504388356	90.3940458769125
"ENSRNOG00000001049"	"Tpt1"	"ENSRNOT00000001383.7"	2.55904703558209e-19	6.03721846477741e-17	1.87338137559455	0.208472932280726	8.09463230681186	137.742874771766	143.591202303865	104.389551575048	63.1842733766421	77.172845020642	685.481984286194	811.534324942402	548.924911736913	475.236625159131	423.592540375367	105.216149409593	588.954077300001
"ENSRNOG00000024808"	"Stk39"	"ENSRNOT00000087122.1"	2.70959256352481e-19	6.31717598016132e-17	1.72057652551247	0.191602617765352	5.82448306924546	4.40349285240294	3.61384309472412	4.39139094083579	2.63091404437329	2.0931044589179	23.7249639622372	15.9317256701106	18.3741075086953	10.9982380799735	15.4609162190413	3.42654907825081	16.8979902880116
"ENSRNOG00000004741"	"Rpl19"	"ENSRNOT00000006359.5"	3.08856482679677e-19	7.11698711309669e-17	1.51865845131158	0.169389019551099	7.91774831833229	123.96883036033	121.809484415435	109.954965280788	127.908090483447	107.875530875768	522.363376765217	629.228480242089	438.144094104096	522.452303348835	309.8564306089	118.303380283154	484.408937013827
"ENSRNOG00000007925"	"Pak6"	"ENSRNOT00000010471.6"	4.47038410528802e-19	1.01827128522405e-16	1.61590518919969	0.181060539867071	7.1844277107529	12.66450324835	9.56170883431207	15.131089108502	6.15122904324038	12.9473689967945	47.0908721200164	56.742471583105	53.4210923979463	33.7776976755745	54.686733569967	11.2911798462398	49.1437734693218
"ENSRNOG00000028505"	"Rps18l1"	"ENSRNOT00000092476.1"	5.00250600708389e-19	1.12653024479979e-16	1.88502219431032	0.211510062717041	7.69207597143795	130.814706938362	162.014966802033	121.46234504728	80.0232765821675	95.1169999601545	763.85861072569	1062.3849975827	515.141376287532	638.496442440235	442.329725655379	117.886459065999	684.442230538307
"ENSRNOG00000010235"	"Pkig"	"ENSRNOT00000051590.2"	5.84330729020805e-19	1.30108787157363e-16	1.48223820908937	0.166637725894607	6.4668376138872	15.0540469816802	16.0111606778068	16.5591419394174	23.5349677420849	25.6417342469308	61.9721162237904	64.8893380175852	54.8029268636059	117.643230795747	82.3366907841887	19.360210317584	76.3288605369834
"ENSRNOG00000053635"	"Zkscan8"	"ENSRNOT00000088280.1"	6.71690578140776e-19	1.47898802077953e-16	-1.61477331188592	0.181854335108272	5.80480488503395	3.91150725438393	4.13160799825139	3.92128688290659	4.37602098223987	3.72104032560399	0.704246279613728	0.604487563085544	0.716777453808801	0.628703660730847	0.935328354095452	4.01229268867715	0.717908662266874
"ENSRNOG00000020731"	"Ppfia3"	"ENSRNOT00000028142.4"	7.008600913498e-19	1.52625762970099e-16	2.42266792198894	0.272984129009967	8.31038689723388	8.86925569983668	9.41450069463586	10.9896600768969	15.6216477355015	16.2374608643368	67.3672126764845	71.8433267631864	125.827154648719	210.172446576868	187.017478122195	12.2265050142415	132.445523757491
"ENSRNOG00000008782"	"Pnisr"	"ENSRNOT00000061139.4"	9.16660296065192e-19	1.97450620512216e-16	-1.56993267015056	0.17749717023743	5.97144205750874	11.0220852523918	10.486892881071	10.7156008409902	9.76279366891386	9.15478866567875	2.35379251668031	1.97541973330333	1.61838994187875	1.57332679802424	2.02504989754401	10.2284322618091	1.90919577748613
"ENSRNOG00000042421"	"RGD1559909"	"ENSRNOT00000065105.1"	1.11090304563605e-18	2.36717910272792e-16	1.603539816119	0.181738308393833	5.71110115238511	16.2588532488798	10.6325851087354	12.6173920477577	11.7974967493364	11.9047124365033	53.6197194136557	71.4937942431767	74.6561695496247	42.0242208787351	40.1172354436782	12.6422079182425	56.3822279057741
"ENSRNOG00000016660"	"Cox5b"	"ENSRNOT00000022487.5"	1.21323208121163e-18	2.55772554823094e-16	1.44964139899846	0.16448008306566	7.34796448833712	121.942794424045	130.082103436773	122.98696212499	113.799098650915	121.301815275034	478.861185648002	495.576931416495	562.388045290251	497.154286998292	267.064510339704	122.022554782351	460.208991938549
"ENSRNOG00000019435"	"Psd"	"ENSRNOT00000026378.4"	1.45737419670253e-18	3.04008257432148e-16	1.68918050718682	0.192107144753503	8.96867744803518	34.7017409395699	43.3438236869344	39.895646136216	41.1390927146943	47.5465351879428	136.773763144564	200.444258681469	175.184267079563	285.042050402091	224.31515660868	41.3253677330715	204.351899183273
"ENSRNOG00000020464"	"Mrpl54"	"ENSRNOT00000027737.5"	1.51705685234558e-18	3.13161621280546e-16	1.63912704765504	0.186510302689215	5.57180653153795	15.2755552767787	15.1526112211133	13.6905812230504	10.0825554819826	11.4357669410957	78.5828652981085	75.3471224541596	64.5330841285118	45.4673804119131	38.7007511092209	13.1274140288041	60.5262406803828
"ENSRNOG00000005299"	"Kif5a"	"ENSRNOT00000080594.1"	1.62700276454453e-18	3.32394987474009e-16	1.53426998337342	0.174735383747857	8.24295761109414	20.6916211878576	26.4755387545096	26.5286375206791	24.6042839415915	27.5565090218816	97.7671244498683	120.587148352552	91.4123369036672	117.740750090572	93.4807118231807	25.1713180853039	104.197614323968
"ENSRNOG00000020339"	"Neurl1"	"ENSRNOT00000054696.2"	2.69930337726789e-18	5.45837704360385e-16	2.11784083339688	0.242776525679078	5.33032733880897	3.26185675095881	5.36513188538082	3.86109311595211	8.06480721002007	9.30034095182848	26.3982655562643	31.8405130653561	48.0570063090393	59.8277779894904	44.9083700641681	5.97064598282806	42.2063865968636
"ENSRNOG00000015221"	"Eif3f"	"ENSRNOT00000021017.7"	2.95878119414226e-18	5.92264312366841e-16	1.42904748612757	0.164012832528814	7.18462739687908	25.7554663989233	26.8535337825151	24.067432376778	27.5729248217084	28.5571467453491	101.155421889809	121.628097570717	88.447116591075	105.638815063682	78.9196938803395	26.5613008250548	99.1578289991245
"ENSRNOG00000010881"	"Trak2"	"ENSRNOT00000014939.6"	3.21246715926991e-18	6.36614616952517e-16	2.52487281862063	0.290092025916683	7.40094357797032	6.35937055932468	7.26638890723462	5.80630844911321	8.45703071078331	8.77543071534586	45.7935659602367	95.0414274704503	38.5527657381116	152.313060268599	133.11086397398	7.33290586836034	92.9623366822755
"ENSRNOG00000019293"	"AABR07006025.1"	"ENSRNOT00000026113.7"	4.46022391045013e-18	8.75131259736537e-16	1.50949708477141	0.174178224614887	5.98161209343433	8.21268539128524	11.7106059613254	11.4027467441026	12.2241071443797	9.80739662590724	40.7097709939593	42.2255396379463	54.5142656108553	48.8669971346741	29.4462876070347	10.6715083734	43.1525721968939
"ENSRNOG00000004107"	"Rpl23"	"ENSRNOT00000005471.7"	4.74847497582577e-18	9.22554201920974e-16	1.54952516159901	0.178944347151666	6.69260354913547	61.9272755995091	58.3738942109063	49.0393323728671	32.5797599386227	41.0138117458556	233.59182647414	258.007493637821	188.475312046177	157.928085742147	150.405372139277	48.5868147735522	197.681618007912
"ENSRNOG00000009590"	"Stox2"	"ENSRNOT00000068562.2"	7.06300538779154e-18	1.35890852203752e-15	1.44903709102663	0.168221229267088	7.27344340537245	5.81908769722649	6.9469692978124	6.2979755477761	5.38762171807855	5.18158827322072	13.6957113918003	21.0861329084814	19.8661043080323	32.7002687180762	30.0187665870833	5.92664850682285	23.4733967826947
"ENSRNOG00000009482"	"Emx2"	"ENSRNOT00000012564.3"	7.25233354155402e-18	1.38191820954785e-15	1.42695726511466	0.165716267433391	6.55673052033173	5.44904796311965	5.09262845042455	5.50464000750785	5.53821972431598	7.83450062218963	20.1799920411521	21.2482680050228	15.3768464026405	30.0266852218202	23.601168065931	5.88380735351153	22.0865919473133
"ENSRNOG00000060518"	"AABR07015057.1"	"ENSRNOT00000079005.1"	8.15853250753871e-18	1.53978703525614e-15	1.84477659901814	0.214575286618354	5.18301837542369	7.95663130697967	3.9303156340738	6.82097137818819	5.72443411724212	3.90339804003665	30.8908834342475	42.9744324509392	35.4021281385387	17.4531902637081	31.6979327433937	5.66715009530409	31.6837134061654
"ENSRNOG00000038190"	"Dok6"	"ENSRNOT00000058139.3"	9.79005226740266e-18	1.83027797908602e-15	1.41785177701817	0.165320422830052	6.64682220064017	13.3398561814752	16.1419901430802	16.9077613876056	12.4033617564243	12.3020413277807	38.8478719479257	58.2293595995678	49.1372426804478	58.9852101327147	55.8044660245828	14.2190021592732	52.2008300770478
"ENSRNOG00000003207"	"Fmnl1"	"ENSRNOT00000087218.1"	1.28215054063871e-17	2.3746146975549e-15	1.77764138931962	0.208025895519687	5.87427717768029	1.72852499346917	1.53213648247551	2.42950134657906	1.94668504599822	1.93023558796688	5.90661212265383	7.28963926927914	11.352660371131	11.6281438719266	17.5406127406794	1.91341669129777	10.743533675134
"ENSRNOG00000011494"	"LOC108348287"	"ENSRNOT00000057222.2"	1.29816013333997e-17	2.38200364466651e-15	1.75011305360864	0.204838786453756	6.44864094158851	36.0160985674837	34.6285088540885	25.7852555521927	17.9228484321231	20.2154919725386	151.126773598747	199.266001185479	122.198640372994	108.952746927453	93.9243967117871	26.9136406756853	135.093711759292
"ENSRNOG00000012929"	"Wsb1"	"ENSRNOT00000017949.5"	1.53287501785028e-17	2.78687928704027e-15	-1.59600348651514	0.187222419474217	5.63433658694548	18.0027612578631	14.8485478058788	17.2281082647797	10.3070094147469	11.1871531428918	2.58398260587648	3.46614036873366	2.89838122671187	1.97426655057438	1.93732090695286	14.3147159772321	2.57201833176985
"ENSRNOG00000011261"	"Ttc14"	"ENSRNOT00000015192.5"	3.27010008892243e-17	5.8912339511069e-15	-1.76869032473378	0.209647655862613	5.1853090250141	7.37188377386383	6.8870513545044	7.62134297453432	7.29338907225566	7.77881826618794	1.11243318025162	0.714348780219973	1.26064390669391	0.902936581344131	1.89846594300534	7.39049708826923	1.17776567830299
"ENSRNOG00000011841"	"Map2"	"ENSRNOT00000092319.1"	3.51995831490246e-17	6.28423548886684e-15	1.80713478014247	0.21442351369272	4.98741402997476	15.5042706110081	12.4611999168555	13.9869138389519	10.4692417765465	12.3600571598961	50.5609811334338	48.9075546908957	48.5387420605604	140.199322779146	78.935844450335	12.9563366606516	73.4284890228742
"ENSRNOG00000028629"	"Akt1"	"ENSRNOT00000031164.3"	4.37682424387547e-17	7.74424339650715e-15	1.40173602940659	0.166826938025592	7.69573878143089	23.4468757168785	26.1541933355199	22.1780409641427	23.0746313320954	19.6116768045841	79.3237105879759	102.197540455936	85.1135792350019	86.6995662282241	63.4133302173273	22.8930836306441	83.349545344893
"ENSRNOG00000005388"	"Rassf3"	"ENSRNOT00000007295.6"	4.70123552806653e-17	8.2446357928933e-15	1.77296836952195	0.211220089949599	5.04972751374628	1.16702835061276	1.04924887296159	0.557059366642975	1.07676467260305	1.09206070500804	4.38003662887446	8.01736890297249	3.17748682282949	6.27935840523972	4.69254343490207	0.988432393565683	5.30935883896365
"ENSRNOG00000045555"	"Romo1"	"ENSRNOT00000072464.2"	4.93722762863918e-17	8.58254736111777e-15	1.49447531354176	0.178164414899329	5.84325993752066	31.2290941674204	34.2667811590157	33.7191923031402	40.5973188393825	44.5400529868362	128.955439408141	136.593251287613	110.697581958477	213.788097651316	120.761345316234	36.870487891159	142.159143124356
"ENSRNOG00000032825"	"Rpl30"	"ENSRNOT00000042688.2"	6.25700869236608e-17	1.07645941252562e-14	1.85865599203273	0.22231985130325	6.1253722165624	23.3858238448529	57.3935740367143	25.9434365141798	33.1756912114015	27.8777979950397	135.64483654523	290.539555265002	125.110557788758	222.627388601911	148.090849163502	33.5552647204376	184.402637472881
"ENSRNOG00000020674"	"Rpl27"	"ENSRNOT00000028060.6"	6.30111983917706e-17	1.07645941252562e-14	1.38934040886741	0.166199973650615	7.62575888301314	189.755871964369	203.602866539452	157.850385633854	157.030741490469	151.202448642721	668.284656081998	738.215041423644	541.436699053735	570.446547364271	459.542934196497	171.888462854173	595.585175624029
"ENSRNOG00000027194"	"Sgsm2"	"ENSRNOT00000079926.2"	7.22920632122521e-17	1.22445454416855e-14	1.66755931879351	0.199869897426957	5.37988427090848	1.71740621041603	1.53602625455082	1.87874855444699	1.20619134462935	1.40896808094344	5.81491712697764	11.1170180653107	8.30470698594881	6.82346653965246	5.48941562034749	1.54946808899733	7.50990486764742
"ENSRNOG00000016313"	"Ctnnbip1"	"ENSRNOT00000055562.2"	7.8242838309658e-17	1.3140155311716e-14	1.36829955600559	0.16418540311324	6.84790596244167	8.80071238336341	10.0876756090748	10.7565120862319	8.08577936999264	9.53406141654496	28.7651712243445	28.7190208216296	35.6537764628088	38.3383809914635	34.1125359207014	9.45294817304154	33.1177770841896
"ENSRNOG00000017673"	"Brsk1"	"ENSRNOT00000031172.6"	8.4040453472327e-17	1.39952072811858e-14	1.73396396829162	0.20827381178787	8.55905012252607	33.0492513206744	32.7576787256206	40.6190003962922	52.8893278918186	63.0460187412691	147.319692904964	157.854965402342	213.168415855512	293.652778649237	327.110134693563	44.472255415135	227.821197501124
"ENSRNOG00000002722"	"Sec14l1"	"ENSRNOT00000003690.5"	8.89435353452851e-17	1.4688283666146e-14	1.36499689106267	0.164088033276511	6.86635244125436	7.49377860551099	9.38344920676905	6.21800306080481	9.30977702237529	8.99127629519569	26.8870033072324	44.8216360927641	22.49078369003	28.1747213562668	24.7447867945424	8.27925683813117	29.4237862481671
"ENSRNOG00000017418"	"Rps3"	"ENSRNOT00000023935.5"	1.01547511492411e-16	1.66311325226869e-14	1.63394801020733	0.196790981881696	7.73505380542531	99.1814919960971	94.7514841736922	84.6652076097464	57.5911472126829	57.9650156935135	442.714027875067	514.237284935467	314.033298668318	303.55362189823	226.493362406162	78.8308693371464	360.206319156649
"ENSRNOG00000009760"	"Palm"	"ENSRNOT00000013762.7"	1.21810146740698e-16	1.97861612947576e-14	1.54790264435544	0.186914806690007	7.37590108777256	10.9940195594661	12.6217286493123	12.1486288875606	15.6183125240973	21.4435315740122	39.4209074491013	58.0498355100298	48.3377192685947	74.8298300614059	87.5632931175642	14.5652442388897	61.6403170813392
"ENSRNOG00000016530"	"Nsa2"	"ENSRNOT00000022138.6"	1.33668380700821e-16	2.15358235800664e-14	1.36430193159827	0.164964838641269	6.69759682967721	22.6308602429382	29.017581658718	25.8584454095008	18.4408937984253	17.3701681892597	71.7815423911125	69.5386585465977	95.2357173717283	72.8090075124366	77.735961542951	22.6635898597684	77.4201774729652
"ENSRNOG00000011893"	"Rps3a"	"ENSRNOT00000016329.6"	1.46582950525329e-16	2.34260833109714e-14	1.60579167556822	0.194423278402324	7.91552703191599	70.5704312527501	79.8739164744016	67.0318381453414	53.8209886120622	49.2970352270836	363.032522007685	430.00287118476	276.928670647231	231.524052772731	165.726285509641	64.1188419423278	293.44288042441
"ENSRNOG00000057710"	"Ccnd2"	"ENSRNOT00000086440.1"	1.49861714120093e-16	2.37584767097431e-14	1.82467611566917	0.220995661593463	8.85649848847005	122.348500287194	157.645778249014	150.565650329641	69.1278709628263	71.7387130991087	629.186669043682	942.146630470651	547.685431111858	429.640431148059	517.160569339453	114.285302585557	613.163946222741
"ENSRNOG00000011841"	"Map2"	"ENSRNOT00000092717.1"	1.84924533993325e-16	2.90845197630612e-14	1.68608536438944	0.204833967734986	7.06377208353665	66.4365164431533	72.398167052409	74.626805462481	40.321688924741	35.1869551684177	204.671584324122	357.567978458131	270.445274073847	290.202611100456	204.303182061137	57.7940266102404	265.438126003539
"ENSRNOG00000000520"	"Srsf3"	"ENSRNOT00000092645.1"	2.27271300185396e-16	3.54632705179055e-14	-3.39004546850749	0.413080548721653	4.0325847848413	4.88299232088959	5.2672867758395	4.1198098804581	5.14501381321624	5.98705995537761	0.128894635826642	0.101914755307333	0.301801498928274	0.0589789311780517	0.255396969245353	5.08043254915621	0.169397358097131
"ENSRNOG00000030237"	"Cox7c"	"ENSRNOT00000051895.2"	2.33505086024092e-16	3.61513303885893e-14	1.68963919348563	0.205965873178352	6.89328519750499	76.179226250656	80.83685900176	83.6757129471377	55.0165293973459	63.9259585533502	384.038497583894	314.296033159595	519.386905518744	294.729448696052	213.195212264583	71.92685723005	345.129219444574
"ENSRNOG00000042869"	"LOC103693430"	"ENSRNOT00000064931.2"	2.47174912065881e-16	3.79710483132525e-14	1.62497334089801	0.198248426720358	7.50734040909337	341.869661226185	331.11532129396	329.287473721986	329.894913247005	271.416110573819	1409.90812140511	1264.1933491723	1816.19912094683	1542.58555435362	855.490232829315	320.716696012591	1377.67527574143
"ENSRNOG00000059660"	"Meg3"	"ENSRNOT00000090095.1"	2.67320855175513e-16	4.07499799001011e-14	-2.76450180651309	0.337660467372467	5.34765903477384	89.2855293327437	94.3599473824017	104.230816550759	194.094758726684	284.065487275614	5.617999876564	9.26746657284453	3.56190392010834	5.77850307617452	19.866031180105	153.20730785364	8.81838092515928
"ENSRNOG00000046316"	"Tomm6"	"ENSRNOT00000070805.1"	3.15958334296795e-16	4.77965367233557e-14	1.62287651587783	0.198709655075991	6.45810880595255	178.210381914992	189.936038973309	174.022912208856	364.256082822563	369.684509989672	710.317079651211	681.071977826127	606.402761225401	2479.02210763104	1073.95621278279	255.221985181878	1110.15402782331
"ENSRNOG00000027606"	"Neurl1b"	"ENSRNOT00000039398.4"	3.26595541408856e-16	4.9031392758328e-14	1.62981248391912	0.199656629261888	5.24505210923042	2.4383720226122	2.79132177964812	2.08647101368176	2.7453081728108	3.56803306417665	8.96828212805861	13.9040407911871	9.54390852854274	13.2170299856619	17.228503545075	2.72590121058591	12.5723529957051
"ENSRNOG00000058478"	"Mapk8ip1"	"ENSRNOT00000079746.1"	3.82730609080712e-16	5.7026860753026e-14	1.58654224055244	0.194813459374277	9.05420316209004	65.7323096481645	61.531400601849	70.6364555983852	54.8583245682805	69.9171796505733	223.655499864951	245.912437251141	318.479861204866	307.116755020587	317.423708041285	64.5351340134505	282.517652276566
"ENSRNOG00000012820"	"Add3"	"ENSRNOT00000017600.6"	4.35127922715429e-16	6.43502242123258e-14	6.7521918477073	0.830695205239772	3.4771010928848	8.01605597503904e-10	0.307844392375829	0	6.76435733981421e-05	2.83689928437591e-10	21.7826378438224	11.6517962771415	11.8679051059571	7.08130827729764	4.87132050159401	0.0615824074069045	11.4509936011625
"ENSRNOG00000000657"	"Nek7"	"ENSRNOT00000090162.1"	5.80444110797893e-16	8.52048958791248e-14	1.51564080616752	0.187269829474795	5.61643114817438	5.49713695841286	8.49272055596928	5.87556743952019	7.1690622186179	6.3503536814617	36.5420093712243	42.1078178218051	18.2435020410702	25.369715706788	18.7387624476899	6.67696817079639	28.2003614777155
"ENSRNOG00000047089"	"Alkbh7"	"ENSRNOT00000072118.1"	6.95467054378576e-16	1.01338754533972e-13	1.57673794945662	0.195350884181656	5.57507088822675	6.82076599084164	5.03151192381682	4.74848577640071	9.11539659249826	11.2109758560092	23.3847813945651	33.6874038729589	25.9303589193875	43.7223053709333	26.9067451930831	7.38542722791333	30.7263189501856
"ENSRNOG00000017571"	"Ndufa2"	"ENSRNOT00000023811.5"	7.66873463944933e-16	1.10927966678808e-13	1.49156662949514	0.185072312733581	5.60143555092066	16.5743980665861	17.8530674983807	18.8817153955903	13.1522340027256	16.1515226691182	75.9602069404098	71.2675291100165	85.9438542951381	43.367910588353	50.5838429869035	16.5225875264802	65.4246687841642
"ENSRNOG00000003847"	"Gid4"	"ENSRNOT00000005237.7"	8.23946394397592e-16	1.18319896360704e-13	1.33100255822895	0.165329778173508	6.63370182698818	4.0826547270345	4.12021349499392	3.54392197934298	4.8407488755664	5.08115849087187	11.557363287498	11.1042558981062	12.6068520363253	23.2660611146322	17.0919378502125	4.33373951356193	15.1252940373548
"ENSRNOG00000019958"	"Tmem151b"	"ENSRNOT00000031706.4"	8.97757126864929e-16	1.27991748079729e-13	2.31407662958528	0.28781741087157	7.1768652701671	14.9158885751642	9.49340065981711	18.7365855131152	7.31922761575018	17.8117748381809	100.943845384717	66.8943488767952	177.298310938518	81.1572043675759	208.616252543223	13.6553754404055	126.981992422166
"ENSRNOG00000002538"	"Epb41l5"	"ENSRNOT00000042862.5"	9.27174769282969e-16	1.31241588592004e-13	1.50094309768347	0.186774278517268	5.57188095582144	3.46956219828358	3.20882752281476	3.32098921440693	2.5687107464977	2.05517524565373	10.194061281168	15.4450930004189	9.99661154568467	13.3179441313276	9.53674175155702	2.92465298553134	11.6980903420312
"ENSRNOG00000000064"	"Atp5me"	"ENSRNOT00000000072.2"	1.21480477051462e-15	1.70736071895661e-13	1.4683747219956	0.183479349617035	6.16428638064514	100.940606159313	122.887611358184	95.2207060422017	130.675890884236	80.0947679711256	453.564161401642	352.47929603697	408.251159532373	405.057132858525	262.793292414886	105.963916483012	376.429008448879
"ENSRNOG00000008569"	"Ndufa6"	"ENSRNOT00000011484.4"	1.3060769022077e-15	1.82271309655281e-13	1.47375253136089	0.184356854256946	5.61383319338418	23.496100884943	23.7463614565936	15.3134106873711	15.2507168261597	19.0433903359899	72.2230797106516	82.0525573197287	73.6237205519977	74.4183468083717	58.7870853031031	19.3699960382115	72.2209579387706
"ENSRNOG00000028021"	"LOC684988"	"ENSRNOT00000034694.2"	1.36758936718798e-15	1.8952110831863e-13	1.71060514096749	0.214137533669404	6.83000061265312	69.4551407828732	69.4587106866002	61.7125348100443	41.2215099043744	45.1598741616182	351.449565841597	368.113561521059	288.722270286499	225.886041006975	164.068139750356	57.4015540691021	279.647915681297
"ENSRNOG00000010107"	"AABR07025295.1"	"ENSRNOT00000059673.5"	1.45541418929735e-15	2.00291270759067e-13	1.6896493073473	0.211717733608757	5.74027111877849	2.65606804391631	2.53095525376362	2.31146840120223	1.72523423184355	1.91546371997762	13.9706344392373	20.5443933816018	7.77054579014734	8.29359467153202	7.35260991112508	2.22783793014067	11.5863556387287
"ENSRNOG00000023993"	"Kif1a"	"ENSRNOT00000036061.7"	1.46832275933172e-15	2.00674152563288e-13	1.96318528914532	0.2460261486344	10.2043653035498	73.2439730812459	80.5221858531674	80.4705026507709	84.6728155616211	109.828378636629	369.34460546881	574.860961571865	411.741693227873	672.337633373881	776.073143804056	85.7475711566869	560.871607489297
"ENSRNOG00000033473"	"Rpl36"	"ENSRNOT00000043704.5"	1.84088933809999e-15	2.49869205569367e-13	1.82017570299161	0.228906288079455	5.96796233014905	51.2006569557119	71.0874023170216	64.7198773270938	41.8467384971549	65.1413642809217	336.332213500647	466.941976759825	231.92468403969	349.444519722485	176.419164899501	58.7992078755808	312.21251178443
"ENSRNOG00000055925"	"Zc3h7b"	"ENSRNOT00000085707.1"	1.87815422649125e-15	2.5319307691413e-13	1.59203408606032	0.200277603388385	8.96082041476204	24.3328392046991	29.6015944637463	22.2893282370927	36.7362752408134	38.7903774847061	94.1255210645773	115.93096023563	96.9292692354628	219.867772185599	159.007637983145	30.3500829262115	137.172232140883
"ENSRNOG00000051382"	"Ntan1"	"ENSRNOT00000093629.1"	1.93153866818444e-15	2.58630417482507e-13	1.54516897909286	0.194466950395367	5.41459947215845	10.9766882607594	14.3677316790992	12.0185912738397	13.0234138343009	12.9034340750039	45.8408505732037	58.5726376581304	43.1520874613682	68.6981146238156	45.5557927061236	12.6579718246006	52.3638966045283
"ENSRNOG00000051170"	"Ddx17"	"ENSRNOT00000076915.1"	2.36695460500656e-15	3.14804962465872e-13	-2.92271844864122	0.369010191504749	4.09655729063986	23.4708859075398	17.6216321298463	21.5947776074271	17.6816702336152	17.9864773871549	1.76733728667615	1.02162118282886	1.23172456600738	0.567906069046255	0.433602019273064	19.6710886531167	1.00443822476634
"ENSRNOG00000002928"	"Guk1"	"ENSRNOT00000003926.6"	2.76060507244534e-15	3.64712738137662e-13	1.32625784136486	0.16785360773707	6.34748336595716	19.8078724109428	19.6750304677458	20.6708544437359	15.9899400589746	15.1007436946411	62.7896925472756	72.5950956153307	73.1981479469575	64.0487128150808	36.9793288953705	18.248888215208	61.922195564003
"ENSRNOG00000004973"	"Ppp2r5c"	"ENSRNOT00000086143.1"	2.95200015166488e-15	3.87415807983728e-13	1.3101093920166	0.165985416505887	6.8618165102433	16.8127924436033	18.074010908342	18.4073294375544	14.687480285032	10.1086675830476	38.121834312615	44.589362982025	70.7241608022877	60.2259565429998	44.3271148052456	15.6180561315159	51.5976858890346
"ENSRNOG00000016603"	"Rtn2"	"ENSRNOT00000022528.6"	3.58652578024246e-15	4.67593298599111e-13	1.50733057700561	0.191562916370396	7.10060960269842	12.4838519701806	12.9332777031827	13.4729354000833	18.1088267055478	20.8310916051982	38.922859505158	55.3025781377566	51.4025574371815	95.9019808406965	80.4447822725118	15.5659966768385	64.3949516386609
"ENSRNOG00000008140"	"Rpl15"	"ENSRNOT00000010759.6"	3.80349411349401e-15	4.92639495732751e-13	1.3359087803457	0.169936141163664	7.96441060512701	52.1229637599031	50.1075642295979	42.9362412301474	31.2076731300277	33.3014843124859	163.239658554189	204.792191467216	139.30945561936	111.648134506169	98.6139812734754	41.9351853324324	143.520684284082
"ENSRNOG00000011488"	"Sergef"	"ENSRNOT00000015352.6"	4.2546073814626e-15	5.47490613496392e-13	1.38310048693166	0.176254225909643	5.91318788004333	6.67522302752535	8.62322164928108	6.79963058584981	6.41109221135572	6.14535317484678	22.6329233891739	21.9044672136436	20.6900586955993	33.1457353492747	25.2355444441715	6.93090412977175	24.7217458183726
"ENSRNOG00000023521"	"Map3k10"	"ENSRNOT00000034609.6"	4.46316259095523e-15	5.70622535902967e-13	1.81779897112127	0.231827089605442	7.72086449837416	10.2977444675259	10.7935994015234	10.7056749763846	14.31459367497	18.8548429773287	41.7330740000266	54.1880644415627	58.4450330554105	107.670995943133	112.304615239432	12.9932910995465	74.868356535913
"ENSRNOG00000000798"	"Gnl1"	"ENSRNOT00000050373.4"	4.99335300973838e-15	6.34315875602471e-13	1.30499626814697	0.166728388228625	6.63454495448251	9.19041863752194	9.63370773851669	11.0663282086085	8.02832739519566	9.61416392451594	26.4472495258681	27.4762092676966	31.4764033639353	39.3350329581294	31.9284725115756	9.50658918087175	31.332673525441
"ENSRNOG00000010158"	"Magel2"	"ENSRNOT00000013483.5"	6.21835957190495e-15	7.84899564563315e-13	1.66841519822774	0.213914803580073	4.98088525131153	0.575035211204192	0.502855773409725	0.85394609219079	0.915342853409438	1.56885792038274	3.44548324278567	4.14620084124677	4.33324692966085	3.40232507918435	4.10702648662522	0.883207570119377	3.88685651590057
"ENSRNOG00000005512"	"Ndufa4"	"ENSRNOT00000007567.4"	6.82295170719699e-15	8.55762240389384e-13	1.28282134467626	0.164723622517136	7.41201567567639	72.3811128980667	61.7307866846357	66.5674529606344	76.0866660006277	68.5791602313336	220.495487752495	203.282106919342	316.25913181982	262.17642736362	132.935855354368	69.0690357550596	227.029801841929
"ENSRNOG00000056174"	"Pdzd4"	"ENSRNOT00000077109.1"	7.11919023997235e-15	8.87301842676302e-13	1.29527158809878	0.166437165169002	7.65000750543313	15.5723779416774	16.3201580851152	15.9206451922621	16.5503750517746	16.483762506011	41.635261211294	48.5827302692945	51.0595453652456	75.604496788125	51.5105695682004	16.1694637553681	53.6785206404319
"ENSRNOG00000019453"	"Rps5"	"ENSRNOT00000026528.7"	7.39794393581398e-15	9.16281593600161e-13	1.4775081449225	0.189972438103154	7.10558675809812	58.3775136802025	61.9321294635891	50.3558263877806	35.5379447451772	37.8307575834048	226.395433585492	270.232183183513	175.998738516245	157.468173073931	121.35003554955	48.8068343720308	190.288912781746
"ENSRNOG00000000505"	"Rpl10a"	"ENSRNOT00000000603.7"	8.99120121040555e-15	1.1066995924634e-12	1.45356345936502	0.187489652901034	7.57003434562817	82.2581509669883	109.446476434764	88.5992041571496	86.1435630744015	61.2770450128746	342.289802144057	493.030339606146	288.341434581419	331.721512450111	192.339620502515	85.5448879292356	329.54454185685
"ENSRNOG00000037402"	"Cops9"	"ENSRNOT00000056600.2"	9.37589787370967e-15	1.13989060222886e-12	1.74574530885	0.225331708814981	7.0273925097437	64.8859630727049	59.2920390191548	46.317414081113	123.864199757237	112.890928437089	293.942604738028	286.602914786443	303.263254879053	687.967680185368	411.489793325941	81.4501088734597	396.653249582967
"ENSRNOG00000060449"	"Rps21"	"ENSRNOT00000084027.1"	9.32641150241487e-15	1.13989060222886e-12	1.9724298443319	0.254568880676591	5.42518972381335	73.6875291645389	73.6531926029322	53.4446296177543	40.6000432236319	50.5532406130407	431.851085643362	351.030569532448	331.434492688093	370.32014967036	201.701002997163	58.3877270443796	337.267460106285
"ENSRNOG00000013118"	"Atox1"	"ENSRNOT00000017588.6"	9.5836262743669e-15	1.15804098706786e-12	1.5236723744222	0.19673838947502	5.29555984556151	12.6652640525783	12.2842184807016	10.3341025921469	13.7318816469773	11.7630664323614	45.9476713432405	48.8774283913858	43.1319288409099	81.1490656174989	33.430595721695	12.1557066409531	50.507337982946
"ENSRNOG00000018958"	"Mt3"	"ENSRNOT00000025669.5"	1.01688536084512e-14	1.22131013308289e-12	1.56582217254553	0.20237772871473	7.81938716560353	296.943954686474	352.609762129324	251.528243082374	173.820872891083	191.45226234531	1062.48488822878	1149.45201778172	725.935781932754	1486.08716251701	734.091992258187	253.271019026913	1031.61036854369
"ENSRNOG00000000541"	"Glo1"	"ENSRNOT00000000650.6"	1.04260198151081e-14	1.24465322093974e-12	1.27545350803537	0.164916187560495	6.69948256034871	28.7618593620704	27.3133241124377	25.2895538737838	19.4357172271401	18.5090926974374	89.8651933587823	98.7912842967815	78.1414885962562	69.7676136070952	46.8005028271656	23.8619094545739	76.6732165372162
"ENSRNOG00000004814"	"Elob"	"ENSRNOT00000087768.1"	1.10001551325112e-14	1.30532978599385e-12	1.2777191178856	0.165355020579998	7.51381852716591	155.570105265724	182.166276734889	165.166586513762	188.044695498903	187.231839936027	505.239659744952	521.606396585367	453.095712338117	812.975347657577	461.823141166853	175.635900789861	550.948051498573
"ENSRNOG00000042333"	"Dnal1"	"ENSRNOT00000076882.2"	1.3634697014591e-14	1.60832613534613e-12	1.28065753713599	0.166324849839218	7.51658226073607	18.4400273814622	19.5691633595169	19.7187463298472	14.9013471027431	14.0855364074151	51.1558094831221	62.4069231145234	62.9935857639074	50.0263571837001	50.1283820565681	17.3429641161969	55.3422115203642
"ENSRNOG00000002652"	"Rap1gap2"	"ENSRNOT00000092203.1"	1.49652531244058e-14	1.75483089447544e-12	1.26566394056774	0.164632164076647	6.7698470656974	9.13142195680535	10.4112326955872	9.99219634138855	9.04576845365845	12.6551998940159	27.2880734956143	33.6185027467762	29.5998034465696	34.7375510370173	36.0219454907988	10.2471638682911	32.2531752433552
"ENSRNOG00000007784"	"Bloc1s1"	"ENSRNOT00000010380.7"	1.58043618694285e-14	1.84232375980273e-12	1.40813620445498	0.18333091661527	5.63930837468435	19.2089779546075	20.9911527804311	17.7014830983601	14.8792633932642	19.7152407335613	74.2804967614938	83.1641932102585	59.3375149829395	69.1698373142506	46.4486563863521	18.4992235920448	66.4801397310589
"ENSRNOG00000038228"	"Serp2"	"ENSRNOT00000058204.2"	1.71153766275808e-14	1.9834819802852e-12	1.33527659415607	0.174076525106913	5.98093576927187	9.01891929779051	11.1977355297696	10.6288687054327	13.5944933626677	17.6364691174521	32.8751215918433	35.6971542139406	42.8623210170439	61.0089187482814	35.8362842995562	12.4152972026225	41.6559599741331
"ENSRNOG00000013508"	"Rpl31"	"ENSRNOT00000033733.5"	1.87698862927317e-14	2.162574631762e-12	1.86375409090722	0.243348500921029	7.41057331335656	40.2866387922827	44.5133524854091	36.6234040385471	22.0387062422214	22.8882468982375	232.169643012656	289.069773190173	211.883767436099	136.649320961305	102.895155422725	33.2700696913396	194.533532004592
"ENSRNOG00000001465"	"Ids"	"ENSRNOT00000042925.5"	1.89792021215451e-14	2.1709207156228e-12	1.43303004851806	0.18714410578717	8.7991885003239	107.693434089724	114.178261785054	102.380229311809	124.555263643812	96.476370165931	308.014831889056	390.323520370857	343.531377610396	768.87984930256	338.297103498182	109.056711799266	429.80933653421
"ENSRNOG00000024845"	"Mrps21"	"ENSRNOT00000034074.5"	1.9061422239409e-14	2.1709207156228e-12	1.32332221994884	0.172829534653357	6.04653204113202	38.333784487177	42.8124352919671	31.7455075571873	37.4584420447634	40.2104931483431	146.636434115944	110.892371813146	128.099487381367	142.06652113701	91.9186265534602	38.1121325058876	123.922688200185
"ENSRNOG00000011841"	"Map2"	"ENSRNOT00000092445.1"	1.96601424891211e-14	2.22631453546807e-12	1.88104320584392	0.245797023065982	10.1997197474949	48.0780355891511	51.5558590006131	46.0222316114274	66.0473555428564	58.4318020873556	215.111952939308	325.594628000856	265.395220129205	572.075965091054	284.803173153027	54.0270567662807	332.59618786269
"ENSRNOG00000006283"	"LOC100362400"	"ENSRNOT00000008276.3"	2.43780620407983e-14	2.7448866787642e-12	1.58582962041534	0.20797399446305	7.43079438754152	80.4882118840722	93.2135729054684	79.2053516516064	48.7943059569379	53.5036807841421	334.359904488954	487.652880229072	260.904394926605	266.240310422069	195.637793397674	71.0410246364454	308.959056692875
"ENSRNOG00000001070"	"Cdk2ap1"	"ENSRNOT00000001419.5"	2.53091220322379e-14	2.83362074188056e-12	1.26112005725025	0.165494853065872	6.5862651801845	20.5284276645506	13.9599399406554	17.8043570688145	13.825771495805	22.6156192500246	52.2514407555277	48.9032192108026	70.6531625301035	49.1917360281578	53.5668247556054	17.74682308397	54.9132766560394
"ENSRNOG00000014078"	"Ndufb8"	"ENSRNOT00000019039.7"	3.30874587685362e-14	3.6630959241122e-12	1.29918887374478	0.171269732425265	6.63888343216183	33.3955140753306	43.685373756409	43.3971303996903	28.7862934848296	35.4914773432872	133.630173690912	126.743198310393	156.709120391698	115.787705287671	71.7318977974795	36.9511578119093	120.920419095631
"ENSRNOG00000013874"	"LOC100360522"	"ENSRNOT00000018820.5"	3.30581338038308e-14	3.6630959241122e-12	2.37147707878472	0.312622820237392	8.10545488385112	238.083896940089	244.88182527512	202.599938687436	82.3151588472262	99.4055098051644	1743.39446585822	2286.83869764866	1610.82645681142	1096.92787249811	914.332193105964	173.457265911007	1530.46393718447
"ENSRNOG00000027049"	"Atp5mf"	"ENSRNOT00000033537.5"	3.74867511032217e-14	4.12708303673635e-12	1.47416388555253	0.194752316711295	7.45599479110197	194.328308157049	196.2013181669	191.39098106031	141.618164450843	151.362282880735	692.23215690253	727.257868940914	820.688193113923	693.795132326094	383.104319725992	174.980210943167	663.415534201891
"ENSRNOG00000010205"	"Mturn"	"ENSRNOT00000013620.4"	3.78572936400138e-14	4.14485076278538e-12	1.44760089463866	0.191275364103434	6.67671471666216	17.1640160063238	17.450746379041	12.4059413104671	12.185978920217	7.96598518264813	45.4415988159774	62.0057470359202	42.6358513226613	67.2246058549993	34.2719743373464	13.4345335597394	50.3159554733809
"ENSRNOG00000025810"	"Grcc10"	"ENSRNOT00000019570.6"	3.9790697578352e-14	4.33259480170441e-12	1.34206629116562	0.177482637512996	5.91252996292743	17.5902523061593	17.1947721788042	14.1056950557735	12.980970188977	16.6319682978146	62.8896219409958	74.0510465611174	50.029347741225	53.5976767175685	31.6678170187829	15.7007316055057	54.4471019959379
"ENSRNOG00000018529"	"Csnk1g2"	"ENSRNOT00000080342.1"	4.11608597823975e-14	4.45729376124466e-12	1.24812716506027	0.165155767577621	6.71505189531714	10.1140754431635	9.54573512147502	10.5574536702852	7.03101856119068	10.2593932873036	22.4108978316272	24.7403173458059	36.5837000361761	25.7042553455751	40.3999997537159	9.5015352166836	29.96783406258
"ENSRNOG00000013078"	"Zcchc7"	"ENSRNOT00000017707.6"	4.17436196474067e-14	4.49583320952532e-12	-1.71401879216026	0.226858804097181	4.89361623140215	8.92752810123258	8.27443548397896	8.7499441531116	7.70164824965877	7.02902684197943	1.6110925598098	1.50353803300871	1.63376928084498	1.20215096151542	0.742666369138007	8.13651656599227	1.33864344086338
"ENSRNOG00000011375"	"Tsc2"	"ENSRNOT00000016221.3"	4.59924281655923e-14	4.90456029900436e-12	2.85033837942552	0.377887751599244	7.00421503128383	1.29746827727814	2.02609314169768	1.8252329987955	3.31367880348536	3.61133204124483	21.5922956185087	26.4977361442693	16.4590755121535	89.3869071769314	60.0622678789923	2.4147610525003	42.799656466171
"ENSRNOG00000005502"	"Ankib1"	"ENSRNOT00000067954.2"	4.60336183889999e-14	4.90456029900436e-12	1.57338173688249	0.208596596813805	5.1888641469349	9.01919168550739	5.41903772446606	7.46075479585115	4.66138514068909	4.37594551650761	27.6908442644078	18.3372543786645	35.251136657322	24.6788694413973	23.6488435028007	6.18726297260426	25.9213896489185
"ENSRNOG00000007957"	"Tspoap1"	"ENSRNOT00000010755.5"	4.75551158701826e-14	5.03957075507705e-12	2.06875646523915	0.274426907686002	7.49195003428417	4.08905229595775	4.51096546654463	4.86343725045459	6.9901812448105	8.28595534317696	19.1457081681725	40.8117219842335	28.6370324989189	68.8366271989128	59.2817531777097	5.74791832018889	43.3425686055895
"ENSRNOG00000057501"	"Fam81a"	"ENSRNOT00000088628.1"	4.88056122373004e-14	5.1445788175882e-12	1.26265474440733	0.167570306750114	7.66337230612979	14.4097418731643	14.2153273458166	14.1615167824377	19.7102683024821	16.4431015090153	37.9258648246318	35.074784029957	52.6429923493178	80.8278121244179	51.4626818591907	15.7879911625832	51.586827037503
"ENSRNOG00000011199"	"Parp6"	"ENSRNOT00000058339.3"	5.32949338376122e-14	5.58807250719556e-12	1.29542006292052	0.172181256682375	8.11209960139317	31.6617959290066	28.629488177737	31.3909098879667	40.3989258627329	37.0220018390262	82.9419128532796	87.6726766737233	106.822327255711	160.553859781364	123.7454582182	33.8206243392939	112.347246956456
"ENSRNOG00000011104"	"LOC100360057"	"ENSRNOT00000014904.7"	5.36511021123479e-14	5.59580995031789e-12	1.68863672191617	0.224471771991528	6.16383754749542	44.7518386765323	48.4913794682093	42.5734039846932	22.2005317051056	27.5542453619655	208.663384888043	228.189714367553	154.853509075648	131.375896636733	125.92193709233	37.1142798393012	169.800888412061
"ENSRNOG00000027355"	"Wdr36"	"ENSRNOT00000075283.1"	5.52412579905924e-14	5.73149743245848e-12	-5.38985721266501	0.716841695001071	2.00178168238714	2.6579483528328	1.73552769092136	3.51711971698353	1.26803170392872	1.66520297018075	2.14230660350949e-09	1.10782934921788e-09	1.66974003471485e-09	0	5.74772733777173e-09	2.16876608696943	2.13352066504279e-09
"ENSRNOG00000006939"	"Ndufa7"	"ENSRNOT00000009425.7"	5.65675534863891e-14	5.83853753874882e-12	1.27233281053212	0.1692879286056	6.43912061779263	50.8277788262574	54.4411499399608	52.907574265083	54.0089006538048	67.0516757696812	205.756086456425	158.110802249789	191.491131832668	230.071747935601	99.8429063377701	55.8474158909574	177.054534962451
"ENSRNOG00000048174"	"Uqcrq"	"ENSRNOT00000073964.2"	6.16591802355373e-14	6.31599642532562e-12	1.60889831757059	0.21439087813589	6.85320394986106	15.9125830849792	17.3181995451027	16.3984156152857	10.7924212593156	16.3625138661279	86.5487380171717	88.6984525815607	91.3861476223868	58.2562679426498	33.4656963050812	15.3568266741622	71.67106049377
"ENSRNOG00000062265"	"AABR07034262.1"	"ENSRNOT00000093208.1"	6.18309182274396e-14	6.31599642532562e-12	-1.88908761936431	0.251739227435003	5.2472080189336	312.861037705163	331.974609982096	370.215698926718	261.897893914983	274.687990482508	30.4873104399952	15.662903816912	41.8008358396311	42.8296211648794	80.9102394543166	310.327446202294	42.3381821431469
"ENSRNOG00000052141"	"Rps10l1"	"ENSRNOT00000043250.5"	6.29000508697006e-14	6.39225799017875e-12	1.65047193386581	0.220007232066181	4.9010929932454	9.86870484779667	10.9640677543147	12.8073292803992	6.83483957010985	6.32057066769801	42.8242998952555	62.4634339933537	26.3316247870923	41.490921085682	38.4546098354922	9.35910242406369	42.3129779193751
"ENSRNOG00000030124"	"Ptpn11"	"ENSRNOT00000046323.5"	6.64257790746364e-14	6.71612073429628e-12	1.28701978366335	0.171722885987213	8.0818859130133	16.3832890003605	17.56875451806	15.8396909949016	11.6751958825361	13.1954208528761	58.2116802195831	68.0357559039695	50.5338853974825	41.3198298780311	29.8788312700219	14.9324702497469	49.5959965338176
"ENSRNOG00000020322"	"Asb1"	"ENSRNOT00000027528.5"	7.95445429098013e-14	8.00169648143925e-12	1.24565767475865	0.166730797548138	6.44545205134536	7.93719682383949	11.4196927884618	9.00426435015383	7.25795835913565	7.90535390690424	19.0066575102056	39.4461727738244	27.9058071640051	30.9213419675751	20.4150182571369	8.704893245699	27.5389995345494
"ENSRNOG00000007610"	"Gdf11"	"ENSRNOT00000010035.3"	8.04154756742812e-14	8.04845192645066e-12	1.24171235657316	0.166234600107388	6.48991101955603	5.30123528162794	4.41049409563864	4.50071947647288	3.73211254268007	3.73720143504542	15.4037501078552	17.3332612071152	12.3510236399271	11.4649948829624	10.8899007856055	4.33635256629299	13.4885861246931
"ENSRNOG00000010807"	"Cox6c"	"ENSRNOT00000014407.5"	8.81894678146704e-14	8.78216423961469e-12	1.5729878277263	0.210927381853764	6.84802625412672	100.669973545558	81.7684806379053	90.9682724392911	65.155551695232	64.8847280874177	382.808646886113	332.658435329181	440.550884341634	357.59836240545	187.29089666965	80.6894012810808	340.181445126406
"ENSRNOG00000004526"	"Cox7a2l"	"ENSRNOT00000065464.2"	9.89098819156792e-14	9.80048564961507e-12	1.23664472739385	0.166163208993661	7.61829518262353	58.2290868104626	54.0205773109095	51.2419180334734	45.3094258006468	38.8942184233622	164.067905221836	166.705332873744	173.076845955434	165.808331649667	95.2234304123728	49.5390452757709	152.976369222611
"ENSRNOG00000048226"	"Hmgn1"	"ENSRNOT00000075126.1"	1.09718140878303e-13	1.08173353123649e-11	1.70158038533726	0.229056717779835	6.30835826269924	14.6191940192477	13.7618558296781	11.1591346628982	9.18909570363927	7.97988792569664	79.450315234951	81.8692908919091	54.9901058309354	41.9416879548401	29.6571609873865	11.341833628232	57.5817121800044
"ENSRNOG00000053110"	"AABR07045047.1"	"ENSRNOT00000079499.1"	1.23453840224127e-13	1.21113106520868e-11	-2.26132484537494	0.30504765675882	4.42375336715502	9.28412577846435	8.20213532261024	12.823445690097	14.8163584207256	18.3890421727984	0.87605859073598	0.99492816458471	1.66925291658205	0.471965702726977	2.3334882293564	12.7030214769391	1.26913872079722
"ENSRNOG00000034180"	"LOC100360781"	"ENSRNOT00000046519.4"	1.37572306614849e-13	1.34299034491944e-11	1.94817222175095	0.263314429090869	6.73156113612737	113.938185002012	135.425257862472	119.962479831884	66.6899612796254	67.6816430568293	775.503413990746	841.740639454232	487.584356717191	427.549754915089	421.775360871428	100.739505406565	590.830705189737
"ENSRNOG00000003494"	"Ppfia4"	"ENSRNOT00000039540.6"	1.47419335890145e-13	1.43206322516422e-11	1.21103200622165	0.163886261723591	7.02942850892309	3.83939981955311	4.14177811646344	4.60984997550263	5.38950042632336	5.35778316825903	10.742943638898	11.3929471947881	15.4550951050652	21.976214068093	12.2884877331329	4.66766230122031	14.3711375479954
"ENSRNOG00000015213"	"Fxn"	"ENSRNOT00000071614.2"	1.53727588829104e-13	1.48605835503724e-11	1.33599220196654	0.180933322472647	5.726262278199	11.5457172485298	12.3502812890396	16.286700984511	10.1466202863741	14.4020768402034	43.8769095433047	45.0265507220429	47.9922146584742	38.077457187807	39.3020868013124	12.9462793297316	42.8550437825882
"ENSRNOG00000008990"	"Amotl1"	"ENSRNOT00000061616.4"	1.55159493091053e-13	1.49261925950747e-11	1.38968133056437	0.188235891707855	5.63164523289202	2.665325730731	3.37437655692886	2.38881023198679	1.70386746836383	2.08779622766256	7.55521009634213	15.4807535318734	6.32384367686148	8.24203419958968	7.39398340138974	2.44403524313461	8.99916498121129
"ENSRNOG00000003891"	"AC118957.1"	"ENSRNOT00000005162.3"	1.64720959436151e-13	1.56936310247414e-11	2.15794341159313	0.29261457354683	4.25605417530515	4.5523228837471	4.21088205093912	2.06367532621292	3.2184124352316	1.42613127404763	26.277831490785	40.717719289838	15.7438710304369	18.7757838645074	15.2626223964766	3.09428479403567	23.3555656144088
"ENSRNOG00000005486"	"Phf20l1"	"ENSRNOT00000093254.1"	1.64380381658294e-13	1.56936310247414e-11	-1.51684447067808	0.205674625160545	5.20337951846529	8.03201345927356	7.47478585413581	9.0557924780243	6.48267628180669	4.593838809052	1.79701496034238	1.44705137227403	1.70367777777074	0.909684348099595	1.11308722829529	7.12782137645847	1.39410313735641
"ENSRNOG00000018212"	"Abhd17a"	"ENSRNOT00000024576.3"	1.80006359306453e-13	1.70678757051482e-11	1.3434030448685	0.182456599567391	6.81535748191098	13.8463673528243	13.4263898056671	17.0757068634259	21.1996589064364	23.0289617516619	38.9557838386414	55.1105930783661	51.0631978560144	94.4927855999997	67.8417486722321	17.7154169360031	61.4928218090507
"ENSRNOG00000060572"	"Tlk1"	"ENSRNOT00000064203.2"	1.84180808488713e-13	1.72981567858807e-11	-5.046323520437	0.685660065845254	1.83001457965855	1.37520979359913	0.814402596339483	0.700206267466782	0.942327800447746	1.42038497898476	0	0	0	0	0	1.05050628736758	0
"ENSRNOG00000029644"	"Clec2l"	"ENSRNOT00000067097.2"	1.84116135904641e-13	1.72981567858807e-11	1.39614129984586	0.189696961334817	5.94698891058994	9.56147402831835	8.67687404509555	5.99126436433304	13.5240925811588	11.2322839283612	21.4224094704931	33.6090662695898	33.2990339870019	49.9021469843134	36.9876766809946	9.79719778945339	35.0440666784786
"ENSRNOG00000000805"	"Gja1"	"ENSRNOT00000001054.4"	2.23237384922381e-13	2.08674304575794e-11	-1.24969548884227	0.170395499902379	6.29613746837574	18.701348193318	23.8772547014588	15.0186589112015	12.8811553390854	12.312268985556	4.02530344388131	4.36277586398875	3.32356778817325	4.46212766225182	4.3892926051122	16.5581372261239	4.11261347268147
"ENSRNOG00000053456"	"Lage3"	"ENSRNOT00000078304.1"	2.61195419352876e-13	2.43009841564129e-11	1.21692822935793	0.166405600551681	6.4841590541711	35.1489208623912	31.4330397481181	31.2170572026565	25.5866166515898	28.9252509292503	110.41739455066	92.7065464492488	108.314761550824	85.1586892724186	61.5816274600472	30.4621770788012	91.6358038566397
"ENSRNOG00000016753"	"Slc14a1"	"ENSRNOT00000074572.3"	3.00513717937893e-13	2.78284128428749e-11	-1.53427695884755	0.21034301425762	5.18281437581282	5.12947976936425	6.48050670353492	5.58467927863396	5.81915618712828	4.71182935031622	1.69629569416193	1.04367514527664	1.31097372590835	0.989335576061864	0.563843115381079	5.54513025779553	1.12082465135797
"ENSRNOG00000001135"	"Wsb2"	"ENSRNOT00000001499.6"	3.05301223071372e-13	2.81402527330483e-11	1.48853062176037	0.204130949443374	8.05611448817718	44.1031305487633	41.2650536710047	42.5781066031861	76.402532597032	69.3489037145306	153.660025975311	159.486375832419	189.207433321044	358.43019420697	231.287844992889	54.7395454269033	218.414374865727
"ENSRNOG00000000565"	"Sgpl1"	"ENSRNOT00000084391.1"	3.25524830251374e-13	2.98653961161643e-11	-1.47755619361973	0.20286643879718	5.33956220016635	5.74039870269844	4.70026418503305	3.87127441002485	5.89030656294381	5.68729279151723	1.36875840623415	1.31682886306744	1.06744296513165	0.860055459495103	0.720537007812967	5.17790733044348	1.06672454034826
"ENSRNOG00000006992"	"Rpl7"	"ENSRNOT00000009431.6"	3.34358790651779e-13	3.05345076237157e-11	1.22835384580055	0.168734964958352	7.866985897326	15.4830401059465	16.4779446536135	13.6571290638081	11.2659600807605	10.3031368904303	52.931048614566	56.7881903495379	41.0086620633989	32.326580039303	26.6131108423169	13.4374421589118	41.9335183818245
"ENSRNOG00000017817"	"Cox4i1"	"ENSRNOT00000024033.5"	3.4049362078042e-13	3.09521196468146e-11	1.49079604691582	0.204854830891301	8.24289390462056	126.436788177925	133.106190554482	131.762315287497	215.60842896495	199.460661173682	447.974521513606	529.198862545561	556.124941267236	1230.05919474774	523.611143251278	161.274876831707	657.393732665084
"ENSRNOG00000019895"	"Nedd8"	"ENSRNOT00000064916.2"	3.42891974321157e-13	3.10278093841204e-11	1.19315294881711	0.163976130217022	6.89333513831951	41.2618557275997	40.945970055269	38.4225290991987	52.1178823241327	48.7625726546621	135.853784336936	117.636892153984	149.927422162341	159.476581601376	87.6403594344734	44.3021619721724	130.107007937822
"ENSRNOG00000006063"	"Phf21a"	"ENSRNOT00000067664.4"	3.66214277275136e-13	3.29875833307335e-11	1.19425089190434	0.164327716072794	6.79319864178635	8.72961562303769	7.74799698420137	9.11497845900034	9.7840791486347	9.73267707368006	20.5066437425507	25.8054775545104	29.2409062267133	29.2669294642335	28.4460593483559	9.02186945771083	26.6532032672728
"ENSRNOG00000013836"	"Arhgap17"	"ENSRNOT00000019304.7"	3.68974360207843e-13	3.30858140101304e-11	-5.02917118593582	0.692105505971141	1.82144563692689	0.888055582183275	1.42870496793361	0.801694055628892	1.22957191641714	1.26275168394262	0	1.44976077492177e-07	3.1879239131855e-08	5.71963945388326e-08	0	1.12215564122111	4.68103422325729e-08
"ENSRNOG00000025443"	"Map1lc3a"	"ENSRNOT00000035060.4"	3.76721919139977e-13	3.36283705927789e-11	1.19007620832901	0.16383948366218	7.04736778670841	31.7785297991738	35.4450883869094	33.0485214704538	44.9052682504405	48.3242816960392	98.6789240552447	100.583658843255	122.427893262694	149.0472848523	91.5554486335183	38.7003379206033	112.458641929402
"ENSRNOG00000022153"	"Tmem134"	"ENSRNOT00000030340.6"	4.15797945505452e-13	3.69500802066437e-11	1.51496145007372	0.208951069688885	5.19502915223939	6.9838065092291	6.94152612408607	4.91152356946276	5.06440981785886	4.12502302406359	27.2654227346593	25.5126903361517	31.2004370223772	12.3911457851354	19.5530457831691	5.60525780894008	23.1845483322985
"ENSRNOG00000015425"	"Ssx2ip"	"ENSRNOT00000041186.5"	4.20673559441697e-13	3.72164639618576e-11	-5.11292368798025	0.705353660002942	1.86331466343018	0.424513908871609	1.93394039475215	1.28936595961037	1.70610258833182	1.19105957257373	0	0	0	0	0	1.30899648482794	0
"ENSRNOG00000010881"	"Trak2"	"ENSRNOT00000015034.7"	4.24411351286538e-13	3.73802655486459e-11	2.49247848804421	0.343906860987581	8.41155889656436	7.26668354425796	9.43237946278698	8.40607624719458	13.7477727032065	14.7896693443921	51.5905305770949	115.27284103545	60.9624325123266	263.595465827595	179.063933450339	10.7285162603676	134.097040680561
"ENSRNOG00000054305"	"SNORD116"	"ENSRNOT00000090150.1"	4.96836587092649e-13	4.29948063162228e-11	-2.21126372091983	0.306008064976932	4.75202057880654	585.534245442212	476.824464344157	599.702735765052	284.376849971418	266.15763502871	36.9400503854371	22.3399931153371	51.1518774006101	31.4357598580773	100.606430091188	442.51918611031	48.4948221701299
"ENSRNOG00000059940"	"SNORD116"	"ENSRNOT00000088084.1"	4.96836587092649e-13	4.29948063162228e-11	-2.21126372091983	0.306008064976932	4.75202057880654	585.534245442212	476.824464344157	599.702735765052	284.376849971418	266.15763502871	36.9400503854371	22.3399931153371	51.1518774006101	31.4357598580773	100.606430091188	442.51918611031	48.4948221701299
"ENSRNOG00000058825"	"SNORD116"	"ENSRNOT00000080729.1"	4.96836587092649e-13	4.29948063162228e-11	-2.21126372091983	0.306008064976932	4.75202057880654	585.534245442212	476.824464344157	599.702735765052	284.376849971418	266.15763502871	36.9400503854371	22.3399931153371	51.1518774006101	31.4357598580773	100.606430091188	442.51918611031	48.4948221701299
"ENSRNOG00000051811"	"SNORD116"	"ENSRNOT00000078955.1"	4.96836587092649e-13	4.29948063162228e-11	-2.21126372091983	0.306008064976932	4.75202057880654	585.534245442212	476.824464344157	599.702735765052	284.376849971418	266.15763502871	36.9400503854371	22.3399931153371	51.1518774006101	31.4357598580773	100.606430091188	442.51918611031	48.4948221701299
"ENSRNOG00000027194"	"Sgsm2"	"ENSRNOT00000034298.6"	5.11209155169298e-13	4.40462253390868e-11	1.62044153983366	0.22436685558409	7.82896200356805	9.50782481270738	8.35611611296477	10.0731862209817	14.9574531131334	16.6643668239323	33.621016529014	38.5121526123213	48.5758425251266	82.0232497607925	71.9783983511392	11.9117894167439	54.9421319556787
"ENSRNOG00000012840"	"Sparc"	"ENSRNOT00000017486.7"	5.20291417184853e-13	4.46346970318279e-11	2.29562370087083	0.31795820762962	9.88692988201657	229.154602420881	208.902847235619	152.796864388828	156.826495073746	78.7762451912108	2087.73637223996	2309.93117546386	1130.53635006255	1587.92151743168	558.524926186006	165.291410862057	1534.93006827681
"ENSRNOG00000032303"	"LOC103690996"	"ENSRNOT00000040261.2"	5.50603468695953e-13	4.70315040480504e-11	1.49445933671009	0.207213064117649	6.74912974618272	157.067911337786	154.194689292112	132.515312468217	86.4337502696341	99.3583132306364	529.757892089994	595.192785634262	418.135099712159	445.810268279088	333.158994370665	125.913995319677	464.411008017234
"ENSRNOG00000023577"	"AABR07068272.1"	"ENSRNOT00000076099.1"	6.15304173590426e-13	5.23325442405213e-11	1.19207021893802	0.165633233627485	6.63242879267907	9.31317339773865	8.7220231750061	9.89712919054755	8.53121537339203	8.28943941691927	26.1037224229219	28.4055628290898	33.1496977154204	19.3131145485145	25.9242800140138	8.95059611072072	26.5792755059921
"ENSRNOG00000005933"	"Yap1"	"ENSRNOT00000008074.7"	6.50716811643612e-13	5.51079275912028e-11	2.38674529352177	0.331980669265815	4.48998108978117	1.6406791167279	2.33559224623862	0.475420545830581	0.733214808238612	0.796069527320523	8.50861325062712	17.8427711360272	9.2285999953115	6.96804919039916	10.0088208336953	1.19619524887125	10.5113708812121
"ENSRNOG00000008639"	"Pabpc1"	"ENSRNOT00000012775.7"	6.88928645872816e-13	5.80957403202621e-11	1.67380610707771	0.233068214281823	7.54479447883991	26.833277794005	25.5175511185261	21.6641662395198	14.1703773319603	11.9766437553949	107.056884056291	153.821180489539	94.1369565252789	59.7239900938788	65.2105877502159	20.0324032478812	95.9899197830407
"ENSRNOG00000008831"	"Hcn2"	"ENSRNOT00000011837.6"	7.10852540190143e-13	5.96905287667291e-11	1.43715518417208	0.200235311848192	6.23710051340672	3.70641905882917	3.73329250453761	5.18199245672625	6.39754573345107	6.32699382933668	11.5408172235827	15.1248451237546	21.0288867398262	19.799640427257	29.5988429497701	5.06924871657616	19.4186064928381
"ENSRNOG00000001170"	"Cox6a1"	"ENSRNOT00000001545.4"	7.57120886268396e-13	6.33074455830414e-11	1.9442118914544	0.271208352270035	8.54461459118075	186.600944461201	171.981464285734	187.423692347684	354.475532982038	524.771222445932	1106.61511810932	1190.13983955021	1244.84418289953	3136.02896433599	1764.547515102	285.050571304518	1688.43512399941
"ENSRNOG00000051382"	"Ntan1"	"ENSRNOT00000093598.1"	7.91210008018745e-13	6.58798686088549e-11	1.25191016285573	0.174782625361855	6.03053989353818	13.9237180370546	15.4386645887978	17.3979903881196	19.3530709413917	17.3411191146773	47.9421707543822	43.8586040255508	55.2985328713031	84.757424555751	35.158505701959	16.6909126140082	53.4030475817892
"ENSRNOG00000042340"	"LOC679894"	"ENSRNOT00000061664.4"	8.29402839235904e-13	6.87710295612465e-11	-1.76851493370706	0.247130232651877	4.83422335776646	3.59186414839433	4.21742011726519	3.94204970994335	2.02613257993354	1.53371809105826	0.610474054264468	0.537619807294069	0.262971960192153	0.456539700674819	0.367588086571466	3.06223692931893	0.447038721799395
"ENSRNOG00000020748"	"Map4"	"ENSRNOT00000056166.4"	1.04418532943743e-12	8.62192528060895e-11	1.28460693594989	0.180307006439242	8.52595533538103	17.0491431416719	18.8473163905074	19.8782693325711	28.0783718249344	37.5212301363744	67.7422837807672	97.5194402730094	54.9304783109949	80.080461361815	80.4537805447801	24.2748661652118	76.1452888542733
"ENSRNOG00000022681"	"RGD1561113"	"ENSRNOT00000034930.5"	1.06201816114341e-12	8.73278585036471e-11	1.3318007251885	0.186992341510565	5.53019532495778	79.5076248939393	84.7800841675142	70.5118892811084	90.7119174625811	87.0453012563287	238.669828612858	271.027993102878	193.937828766362	383.552804744791	200.950513474494	82.5113634122943	257.627793740277
"ENSRNOG00000017127"	"Rpl28"	"ENSRNOT00000058943.4"	1.17309330498782e-12	9.60627686981142e-11	1.30853232167023	0.184079901807759	5.63191908888415	5.70327087827272	5.53309919860485	4.80081065120602	3.92419840996455	5.44363319755514	20.2044177251431	19.6953690003669	15.6553787787012	14.3242081242816	13.9697663886573	5.08100246712066	16.76982800343
"ENSRNOG00000016733"	"Rab13"	"ENSRNOT00000022627.4"	1.24086080344654e-12	1.01193985769137e-10	2.48938185242818	0.35058037240745	3.85752139306373	1.43259532516577	1.36193270654826	0.942007988404739	0.823720118275	0.439134181562673	15.9579041929769	17.9534903618288	9.29757814664423	6.59824188618	6.12858416643612	0.999878063991288	11.1871597508132
"ENSRNOG00000000150"	"Dnajc1"	"ENSRNOT00000000162.7"	1.54857419082306e-12	1.25770880080085e-10	1.44132897936042	0.203863514593289	5.19015486413338	2.7769510332351	3.32598976456919	3.00770913590586	1.50473239746287	1.95170223067944	9.7707965573498	13.1980484776554	10.2545041629748	5.46617643618932	8.59723036603331	2.51341691237049	9.45735120004053
"ENSRNOG00000013884"	"Psd3"	"ENSRNOT00000041994.6"	1.70374208210957e-12	1.37808395270063e-10	1.1722708481408	0.166119202142725	6.74508490167954	15.8458503808751	18.9271087569228	21.2026314532734	11.4317483428016	15.0301033055524	40.9432914898031	48.3508086893727	63.212801390439	34.7643091414051	48.5458078779608	16.4874884478851	47.1634037177961
"ENSRNOG00000019682"	"Timm13"	"ENSRNOT00000026648.3"	1.81586609590658e-12	1.46280562693417e-10	1.23573841972588	0.175333291000926	5.92577477019624	14.4185387358798	14.7720109304381	14.5190668100654	15.2764778371693	18.3421706184363	46.998720024609	47.7600497330911	55.6643143750497	52.3481342917952	33.6817733579056	15.4656529863978	47.2905983564901
"ENSRNOG00000014214"	"Rpl27a"	"ENSRNOT00000019247.5"	1.84976034323747e-12	1.48407695230514e-10	1.79706335236955	0.255070299931958	7.40876891762243	50.0865608405725	47.9712652484879	43.8507255065582	22.898098070181	26.0501412506222	248.810021496477	309.699988723939	225.834075565799	131.732817781891	117.914149746345	38.1713581832844	206.79821066289
"ENSRNOG00000050660"	"LOC100911713"	"ENSRNOT00000075612.1"	2.24582605480653e-12	1.79457802129439e-10	1.33751843649129	0.190575820208748	5.54270741281467	27.6638836129227	34.52858803552	37.4482806994625	29.777451638536	35.7279851625784	147.702389986791	103.539433720064	120.586851956315	93.988637372251	75.1860210426973	33.0292378298039	108.200666815624
"ENSRNOG00000010301"	"Eif4e3"	"ENSRNOT00000013719.6"	2.75560087060187e-12	2.19308202621355e-10	1.19587048809718	0.17109145334475	6.13416439339954	5.50560249314683	4.98666431027118	5.84681772669357	4.50297494875778	4.67091425016356	13.3393001978052	12.910265718224	16.9171843386536	18.4255194836131	13.933945387741	5.10259474580658	15.1052430252074
"ENSRNOG00000021035"	"Rpl18"	"ENSRNOT00000028555.6"	2.98603021824404e-12	2.36696643339768e-10	1.14397043826874	0.163930658956999	6.91193100987111	69.4332191931937	68.9671292125355	61.7011149051411	56.3000757541157	61.1673546273853	182.738447207985	205.274441827835	160.151724106644	174.236250886371	148.368310604502	63.5137787384743	174.153834926667
"ENSRNOG00000008088"	"Btbd3"	"ENSRNOT00000010835.5"	3.20051641901482e-12	2.52687784365007e-10	1.59930948029758	0.22950141366034	7.92182678942928	32.0088454553845	20.3477949622583	42.397099930848	16.1665644920137	27.265589370579	100.761128333402	76.1418823730447	179.828453208499	99.1187916634343	147.295942804444	27.6371788422167	120.629239676565
"ENSRNOG00000018153"	"Rbm5"	"ENSRNOT00000085364.1"	3.24689270948726e-12	2.55332035015512e-10	-1.44582373856267	0.207536456995595	5.87439366833192	11.0449507451361	10.4649730682632	11.8261337570468	12.060977886746	13.3130103380987	1.88303658948279	2.3440219528391	2.18207842719663	2.00403075907532	4.55782164398636	11.7420091590582	2.59419787451604
"ENSRNOG00000012297"	"March8"	"ENSRNOT00000092477.1"	3.38669023873957e-12	2.65272887198032e-10	1.29866729022178	0.186572288098459	7.17280490074994	10.1516300645965	8.59193617898836	8.37921665917533	4.64682620488927	6.50072340883772	23.1390622260944	27.6685035433528	17.1352949795823	24.6651783352553	30.4029845367191	7.65406650329744	24.6022047242008
"ENSRNOG00000014508"	"Mgll"	"ENSRNOT00000029125.6"	3.7112713032029e-12	2.89552218171543e-10	1.34264023595314	0.193247881740612	5.41158549821948	6.43531716828596	6.32508353226888	5.92914271583085	3.45072854939987	4.79659126638889	14.8871285445376	16.5128211101716	30.4619880966253	14.6868997965904	16.4586797454599	5.38737264643489	18.601503458677
"ENSRNOG00000004992"	"Rab1a"	"ENSRNOT00000078710.1"	3.82110515762702e-12	2.96672414965571e-10	-4.76062333562904	0.68560870589278	1.68716448725458	1.93574270839093	3.00647055125268	4.0244112580522	4.17270053733045	4.48165188883174	0	0	0	0	0	3.5241953887716	0
"ENSRNOG00000002652"	"Rap1gap2"	"ENSRNOT00000065045.2"	3.83247404910865e-12	2.96672414965571e-10	1.3409774416486	0.193134657145903	6.81120687888685	4.35895084459603	5.13976768110033	4.77949179144403	7.51808823145135	9.42650331157514	15.2701589875047	18.5076085216754	17.1329850715618	29.0538123884386	24.8153080262067	6.24456037203338	20.9559745990774
"ENSRNOG00000019178"	"Taf10"	"ENSRNOT00000025955.4"	4.14606298481386e-12	3.19698560972982e-10	1.1711547797021	0.168946338652663	6.26356449151872	18.7211523971837	14.6530794642875	15.8463422043003	23.2752813589321	22.9767277498792	48.6533115039389	44.5462453191645	55.0591843318078	63.3175747329062	57.3541879466529	19.0945166349166	53.7861007668941
"ENSRNOG00000058461"	"Sfpq"	"ENSRNOT00000084202.1"	4.40549298156094e-12	3.3838625742478e-10	-1.17663464122554	0.169947400354208	6.31724861852574	17.5255427383795	20.8191934641741	22.036916135818	21.8507482614976	20.7233688801404	6.1225806113098	7.61089797750841	4.21135109972042	5.86829253697194	4.87285109193132	20.5911538960019	5.73719466348838
"ENSRNOG00000011817"	"Rpl22l1"	"ENSRNOT00000015756.6"	4.49459115220107e-12	3.43896960861655e-10	1.29220771008544	0.186716686046151	5.5617793323438	17.2489375227844	22.9114366229219	16.5215009711415	19.9944366631031	12.2842566779209	40.0517454776706	67.085162378208	50.2299202046652	90.0056239591611	41.8350651118102	17.7921136915744	57.841503426303
"ENSRNOG00000020423"	"Apc"	"ENSRNOT00000090264.1"	4.74011388065162e-12	3.6128783374182e-10	1.87124777967186	0.27067950686809	8.97817036379382	15.1901391151465	18.6001297911079	15.3212884247207	19.2904882384794	15.9326021479979	53.312952399197	161.870199976982	51.3790067651273	176.121596074577	111.616742359572	16.8669295434905	110.860099515091
"ENSRNOG00000020769"	"Crebrf"	"ENSRNOT00000028186.7"	4.78503307796438e-12	3.61927482847405e-10	2.20466185348866	0.318970192143215	6.22907270200975	7.57915951672676	5.72353289745966	5.82389341926916	2.03895144437487	1.68028677571338	34.2560702271736	35.9565218861214	37.5806772626788	28.0847127630242	23.0160121323995	4.56916481070877	31.7787988542795
"ENSRNOG00000010440"	"Gnal"	"ENSRNOT00000086679.1"	4.7824270012402e-12	3.61927482847405e-10	1.43523322392515	0.20764703627556	5.12883736219301	2.57080559631378	3.21655637054952	2.90679761368959	2.42541338123257	3.43959193117898	9.38448788776156	11.9614781874315	11.3330968095878	15.8386778027601	7.29568369096594	2.91183297859289	11.1626848757014
"ENSRNOG00000003882"	"Cep350"	"ENSRNOT00000005195.8"	4.86005012638816e-12	3.66203853059446e-10	1.42434112271953	0.206139297593356	5.3412876528572	1.62916793062177	0.752171535065514	1.22945374179158	0.935343381347669	1.19453042237272	4.29399426407175	4.47451736902157	4.85803118578389	3.45304314951275	3.70906763091114	1.14813340223985	4.15773071986022
"ENSRNOG00000059463"	"Slc39a1"	"ENSRNOT00000089016.1"	4.9458611354145e-12	3.71258068638293e-10	1.19588867045771	0.17313850060109	7.79711355810367	31.7103944794127	32.0971523263048	27.0301467829558	24.8470162151228	25.4143288930536	103.971584198699	138.351137272565	60.771917676929	77.5613504798375	56.3958784730667	28.2198077393699	87.4103736202194
"ENSRNOG00000000957"	"Rpl21"	"ENSRNOT00000001265.5"	5.38528281863903e-12	4.02717545724414e-10	1.75340187710745	0.25429932406639	7.25817412569596	114.205638821338	131.22034598847	120.447189706611	65.3373756559837	69.330453927294	547.69880501556	742.352680259979	563.275264129706	354.70479258208	302.538863276625	100.108200819939	502.11408105279
"ENSRNOG00000047988"	"Bola2"	"ENSRNOT00000073652.2"	5.46357763936802e-12	4.07036534132917e-10	1.60544177866512	0.232909700975733	5.88880824032502	16.9112066705342	20.2902153235466	14.1480997877726	10.431886762266	11.7281388134604	82.4306621551485	98.3487137978757	70.1809422973125	44.2201094465011	37.653310741901	14.701909471516	66.5667476877478
"ENSRNOG00000030520"	"Sarnp"	"ENSRNOT00000009155.5"	5.52470579249671e-12	4.10049043782424e-10	1.19319334337984	0.173142443693193	6.03843228921445	11.193471949235	9.18952029730672	12.0038287471401	14.1943970881118	12.6326848576491	28.7601873860127	29.4190311736333	30.4605102496464	52.3809149194322	34.7095093055804	11.8427805878885	35.146030606861
"ENSRNOG00000009951"	"Aif1l"	"ENSRNOT00000013286.5"	5.66672479789091e-12	4.1902046761121e-10	1.73136646790321	0.251367622592627	6.19648323697998	5.15054768725687	5.30611534343676	2.50177445541183	3.43809448901133	1.74000300133816	21.3448414993643	22.4736662672167	15.0240509412458	17.3427645556736	10.6366859099842	3.62730699529099	17.3644018346969
"ENSRNOG00000021091"	"Trank1"	"ENSRNOT00000028633.5"	6.33468957116567e-12	4.66671164430446e-10	-1.13697520554037	0.165452519655474	6.72579446265184	8.75898284814798	6.85348417145917	9.22367027708931	6.46802581336691	7.86681226530045	2.1948546620242	1.63525950583787	3.6054201767952	1.86708028603962	2.23312011547713	7.83419507507277	2.3071469492348
"ENSRNOG00000038184"	"Camk2n2"	"ENSRNOT00000058131.4"	6.48820857187919e-12	4.76210478773814e-10	1.73466854497794	0.252554333613932	4.48828885436037	6.05769284924841	5.49356297749263	9.74469503875987	6.56056796086048	8.06814895410222	35.7778944577598	34.0461230421983	32.7607085991214	44.437705433315	27.0024080019532	7.18493355609272	34.8049679068695
"ENSRNOG00000004680"	"Kif5c"	"ENSRNOT00000006341.7"	6.85690228225386e-12	4.99928182571013e-10	1.48040271936726	0.215783082557371	8.36197778156072	38.2329181885772	46.2608248655225	51.8223370478693	24.5390521850777	25.1503809371639	164.437459549274	209.057948750919	152.074665942438	117.245008188362	84.5583499648753	37.2011026448421	145.474686479174
"ENSRNOG00000008578"	"Cdk16"	"ENSRNOT00000011592.7"	6.861808833795e-12	4.99928182571013e-10	1.13470649734746	0.165396962100995	7.179492419672	20.4656098055404	21.3290785870639	21.6175308756498	23.093798392581	25.0921240746798	56.439173844315	56.5261804621881	61.2114100887199	73.8655517684351	60.9125425821124	22.319628347103	61.7909717491541
"ENSRNOG00000052296"	"Shank3"	"ENSRNOT00000092535.1"	6.97498043802949e-12	5.06312041540038e-10	2.38728370121948	0.348093561963387	6.36781328909527	2.78801313441722	2.97548968733784	2.68751604667005	7.11584499327606	6.39231158310947	17.8197166350119	33.1189955776768	29.0165438924436	80.1996319984103	63.4871704584448	4.39183508896213	44.7284117123975
"ENSRNOG00000009364"	"Ndufb9"	"ENSRNOT00000012616.7"	7.05616904469875e-12	5.10336138535748e-10	1.59612406235112	0.232789477040165	7.22691028319708	70.8231228959588	70.5464750017801	65.1901220878611	43.1056146839263	41.9911289945118	295.105543618543	303.383571547075	325.577696326279	247.981890386848	122.497039269688	58.3312927328076	258.909148229687
"ENSRNOG00000032574"	"Scrib"	"ENSRNOT00000045280.4"	7.21603653750755e-12	5.20000712959226e-10	1.14611524692303	0.167235279096157	6.38448820120304	2.56826509445185	2.91725325222586	2.36070781740694	3.15121056936497	3.6414389576714	5.91377858093784	7.35931339309635	7.00785214733372	13.3452799615394	8.70683369711339	2.9277751382242	8.46661155600414
"ENSRNOG00000015625"	"MGC116202"	"ENSRNOT00000020927.3"	8.4268273694079e-12	6.05052311520132e-10	1.11967582677192	0.163908663453205	6.93953647560048	15.1953583269699	18.1140112165328	17.37464736775	12.9846119506559	13.7769648695414	40.5283350580168	44.5549362105757	47.2023732775034	42.6163096906151	35.2732358155914	15.48911874629	42.0350380104605
"ENSRNOG00000046002"	"LOC301124"	"ENSRNOT00000075344.1"	9.45654534172782e-12	6.76535592191408e-10	1.1627811769586	0.170632364227183	6.6580461463917	16.0851372397077	21.2533935941555	17.8850074691229	12.4285471334684	14.3523813797851	50.4952915020414	55.2831114239644	60.7480687710412	42.7885577377931	27.6265763831959	16.4008933632479	47.3883211636072
"ENSRNOG00000057315"	"Kcnh3"	"ENSRNOT00000086611.1"	9.53489510484817e-12	6.79687108966821e-10	1.66892420359918	0.244948984053928	7.55475181783921	10.8300938647781	5.61328778432482	16.0571864343845	12.5043664369634	12.788132270703	40.1694508570843	31.1892337080077	68.7437206721317	70.5765112522561	60.7698193819693	11.5586133582308	54.2897471742898
"ENSRNOG00000051706"	"Tep1"	"ENSRNOT00000079506.1"	9.71850974541815e-12	6.90292858870794e-10	-4.9296714946567	0.723822209125487	1.77287398610467	0.642716986475086	0.539349738177785	0.399232113016817	0.235937825083938	0.309201855378431	2.75454007984943e-06	2.01905113566395e-06	1.2742790022709e-06	3.96671730746513e-06	5.28880115152161e-06	0.425287703626411	3.0606777353542e-06
"ENSRNOG00000018602"	"Camta1"	"ENSRNOT00000093092.1"	9.78286371595431e-12	6.92382179496666e-10	4.92957158107176	0.723908458852684	1.77163860997594	0	0	0	0	0	8.37644186366058	6.68946836535447	11.7837761656554	5.02568572139005	6.80390082171756	0	7.73585458755561
"ENSRNOG00000020763"	"Snrnp70"	"ENSRNOT00000049957.4"	9.99867452276783e-12	7.05137839920605e-10	-2.30705181750721	0.338947257242304	4.91789657140977	10.5403122550686	9.75978698419984	10.2033959846653	33.5563028787204	35.0166016829296	1.80455171827791	0.856722944958581	1.09514994385015	1.86295742413996	1.97576950921223	19.8152799571167	1.51903030808777
"ENSRNOG00000034078"	"Mxi1"	"ENSRNOT00000042822.4"	1.07282871930788e-11	7.53909458529227e-10	1.30416771784832	0.191891611089785	5.60172883190828	2.20855914440281	3.21038562735606	3.45447581236796	3.65457272842916	3.39453617430227	8.47745298290407	8.8658227206719	12.3901493642001	11.9792127297244	10.4101731889393	3.18450589737165	10.424562197288
"ENSRNOG00000012906"	"Bcas1"	"ENSRNOT00000055111.3"	1.13816559267102e-11	7.9699743992797e-10	2.74914273949524	0.405009328150834	3.71291272964824	0.284045225293291	0.259260337822415	0.215492441115436	0.138435099205152	0.0959754343985856	2.15067873108429	8.50035557185138	3.95134846851102	1.93331112989572	1.00750416676742	0.198641707566976	3.50863961362197
"ENSRNOG00000032183"	"Scmh1"	"ENSRNOT00000045954.4"	1.15163489957897e-11	8.03589746653394e-10	1.39760155668827	0.205949037362409	5.4038340713527	2.5646659060552	1.96962825139153	2.17560031951327	4.56802106464043	3.68036654201229	8.65854103263773	8.05154723046361	8.21995809713065	14.6462430209166	13.4370759081345	2.99165641672254	10.6026730578566
"ENSRNOG00000002835"	"Luc7l3"	"ENSRNOT00000003914.6"	1.25458402280587e-11	8.72354090524348e-10	-1.27516101095175	0.188249481927298	5.93401632057847	10.9653495637967	10.7034657279719	12.0643400728302	10.2350944566665	9.1267321149788	2.89438143185515	4.31824136508617	2.89977230601082	1.33467035773177	2.5805164120726	10.6189963872488	2.8055163745513
"ENSRNOG00000025216"	"LOC108348106"	"ENSRNOT00000051259.3"	1.26463587568726e-11	8.7626885134596e-10	1.32966624533916	0.196329429431934	5.34129447718068	6.80336587853722	7.87846725379952	7.37588523174484	6.34431548192984	5.66162866122185	22.1378700238133	23.860687319964	33.0164617505416	21.7129462162421	15.6320967900397	6.81273250144665	23.2720124201201
"ENSRNOG00000013694"	"Ntng2"	"ENSRNOT00000082489.1"	1.29343448891692e-11	8.93100741005803e-10	1.18167397649855	0.174561856702822	5.98186535787492	4.86135568606288	4.85821463214366	5.12759066375809	6.36231281597172	3.86022307918259	10.847886220815	12.9194533288261	13.0949429812465	21.590547693572	15.4631077807111	5.01393937542379	14.7831876010341
"ENSRNOG00000019007"	"Rpl14"	"ENSRNOT00000083427.1"	1.31395073743512e-11	9.04116727908045e-10	1.65548736370811	0.244637869700344	7.45652035682569	85.7139821725602	96.670689418282	72.4272824865926	48.8440934734916	48.646905071817	411.002803526796	487.277266365531	319.958756221328	262.975968553091	171.412317759746	70.4605905245487	330.525422485298
"ENSRNOG00000002185"	"Pgm2"	"ENSRNOT00000002977.5"	1.3305173154321e-11	9.12348153630378e-10	1.15327659647171	0.170469901525152	6.20990439582406	7.99053569638816	6.84046482360727	8.33223531994055	4.06379395482249	7.8421839430331	19.3716992496094	14.5326799278061	23.0043013373178	16.2126739246643	24.6227258932755	7.01384274755831	19.5488160665346
"ENSRNOG00000004680"	"Kif5c"	"ENSRNOT00000081744.1"	1.40378590386918e-11	9.59269836447436e-10	1.50898750831912	0.223305094562105	9.77150525994602	76.7824151314037	72.3041750891154	77.3450661441902	54.9059064513483	48.4483650141823	260.681316177468	302.657724280335	288.228768684817	278.180104097851	192.727631377296	65.957185566048	264.495108923553
"ENSRNOG00000022173"	"Gatad2a"	"ENSRNOT00000027943.6"	1.40918567074249e-11	9.59650599213191e-10	1.1066516585156	0.163779556212825	6.98928437865895	6.08980261622314	6.69158859828072	5.66959682438853	6.25279839560786	6.11255382894167	15.3258571002158	18.7975440513757	12.7819646499862	20.1803612932624	16.9695577306006	6.16326805268838	16.8110569650881
"ENSRNOG00000002653"	"Kcnk2"	"ENSRNOT00000077282.1"	1.42219617256986e-11	9.65193888760853e-10	4.93077139960405	0.729876287851472	2.94927492490256	2.44140704010203e-05	0.299776549466096	0.418592485530986	0	0	5.72220855397099	9.99340253393653	9.03509503560087	8.68360519433649	6.66710646803304	0.143678689813497	8.02028355717558
"ENSRNOG00000016733"	"Rab13"	"ENSRNOT00000092112.1"	1.52054569431465e-11	1.02841822608305e-09	2.67779961166184	0.396950661363842	4.87472653050248	4.43090197691463	4.61889819310295	2.77080732442694	2.26885972883746	1.30951431168496	59.4470408166113	77.3474598546538	42.643671633657	20.5002566323463	15.3006934129044	3.07979630699339	43.0478244700346
"ENSRNOG00000056454"	"AC096600.1"	"ENSRNOT00000091743.1"	1.55595773381001e-11	1.04878960581337e-09	1.76459967564906	0.261709761786344	4.40980580475243	61.2401505732335	57.3322700292979	46.2104278477708	55.6442122860372	43.5235181473846	172.557047656264	333.664559966837	266.29662314331	350.382612320377	293.219465644493	52.7901157767448	283.224061746256
"ENSRNOG00000005184"	"Nop10"	"ENSRNOT00000006887.4"	1.56145899481613e-11	1.04892992882276e-09	1.10420748378611	0.163778705420642	7.0966954017407	41.3595901100282	42.8124801310007	42.3547298963428	59.2967688278884	62.6832178428566	122.164511738037	104.803954586411	127.798744627264	174.754319615343	128.641009343882	49.7013573616233	131.632507982187
"ENSRNOG00000020513"	"Becn1"	"ENSRNOT00000027868.7"	1.83477307648581e-11	1.22836817759187e-09	1.17362461239848	0.174682880996277	6.48431068130791	10.4853090444509	12.4109039673441	10.2658196157024	6.61834677875801	6.44843195555417	23.2318846430345	29.1171254395577	22.8732038238634	32.711101785568	22.1767670542414	9.24576227236192	26.022016549253
"ENSRNOG00000019657"	"Mk1"	"ENSRNOT00000026601.3"	1.9018717795042e-11	1.26900313314595e-09	-1.95663578208381	0.291453826302341	5.53969101429462	9.93386996551219	9.6815962811684	11.1109014496812	20.1948111445365	22.368231794557	0.835323115559193	1.96423541731264	1.64981800785095	1.54114693740341	3.54191824953999	14.6578821270911	1.90648834553324
"ENSRNOG00000026716"	"LOC100364457"	"ENSRNOT00000038927.5"	2.12965048463215e-11	1.41621757228038e-09	1.59270856212627	0.237829633949298	7.61576270313845	109.136073636167	112.011124717183	71.2575938047112	72.9915770902518	73.0441894305069	190.476415240321	591.370299796695	344.142812886648	580.028082604039	303.913135820402	87.688111735764	401.986149269621
"ENSRNOG00000008761"	"Ncs1"	"ENSRNOT00000011648.5"	2.16519005481194e-11	1.43503582997352e-09	1.22725736152597	0.183325241183578	8.65548415203346	29.5696145458511	33.385072816723	30.6215076910777	39.0916715188397	38.9320659920956	70.1772544938521	89.7440578295169	90.9977845780252	160.459394514638	130.140059806816	34.3199865129174	108.30371024457
"ENSRNOG00000016031"	"Bicd2"	"ENSRNOT00000090647.1"	2.23150517976635e-11	1.47405793824766e-09	1.37808442025075	0.20599128669223	7.19109877561479	4.58617171757611	4.5334868426973	5.00079743856871	5.33520186311269	5.89505490499277	12.1702197160929	13.4307166870152	18.1099219743054	16.3650747865799	37.5508740752437	5.07014255338952	19.5253614478474
"ENSRNOG00000054514"	"Mkln1"	"ENSRNOT00000081707.1"	2.24387858242425e-11	1.47730703880071e-09	1.09776221673434	0.16410954546654	6.86982495327407	15.8076919703106	15.6726720958043	15.9768307568781	10.1114232814758	8.80533418019123	32.882952106675	32.727861640429	40.8478432880702	34.9658266441573	30.8800060660068	13.274790456932	34.4608979490677
"ENSRNOG00000047746"	"AABR07000398.1"	"ENSRNOT00000074325.1"	2.40265273886004e-11	1.5766016333109e-09	-2.0858878337509	0.312296491117962	8.20144875295443	327.709848845377	358.637979521487	361.124163204183	757.443724538147	1070.34391969764	55.2933968494988	63.7595898846522	29.5429993921216	47.5354224018183	110.607175848164	575.051927161367	61.347716875251
"ENSRNOG00000020423"	"Apc"	"ENSRNOT00000027691.3"	2.44574691395534e-11	1.59958305590274e-09	1.80913970232936	0.270967833950653	9.65116463091128	33.1162847033061	39.2781132181625	32.0914054125214	41.3619949188355	29.5839162874536	114.463033794906	263.721842141452	95.4582538842806	384.790111462624	221.122620806015	35.0863429080558	215.911172417856
"ENSRNOG00000058842"	"Sptbn2"	"ENSRNOT00000088288.1"	2.61487580525106e-11	1.70457216554804e-09	1.50082706288991	0.225120440790926	9.3066806376985	23.3279602341239	30.8823279161558	29.5051581124069	36.7910869958457	32.2794265749732	70.569811840445	144.887324393479	95.8680644554801	241.249314752521	109.647605230869	30.5571919667011	132.444424134559
"ENSRNOG00000025715"	"Dynlrb1"	"ENSRNOT00000067854.2"	2.72076848366429e-11	1.76778587018935e-09	1.16226902117401	0.17449017149703	8.24526417178769	186.116467099525	188.693401806598	167.270992704555	284.31082751545	274.366274581067	501.30653178943	454.599693062613	575.490935401078	1009.98592460947	585.128216119514	220.151592741439	625.302260196421
"ENSRNOG00000021866"	"Bola3"	"ENSRNOT00000031583.4"	2.79120868813613e-11	1.80762688146385e-09	1.26191090490519	0.189556218565188	5.46671986218826	5.18525787192626	6.82821325191624	5.40200852870926	6.61716059049441	9.19698517257554	22.7577170375684	16.9299130457989	22.2148685712538	22.4334973832946	18.1982213675569	6.64592508312434	20.5068434810945
"ENSRNOG00000037897"	"Rps19"	"ENSRNOT00000027246.5"	2.81679789245254e-11	1.81825680243427e-09	1.71793370127197	0.258109087438625	6.76933618078162	78.052825748689	73.3733933268031	53.0634050689347	45.5381543192341	27.294305766298	309.673626267443	380.991026736182	232.140699297105	207.323160791617	172.879044315636	55.4644168459918	260.601511481597
"ENSRNOG00000026238"	"RGD1562618"	"ENSRNOT00000033397.4"	2.97655690914296e-11	1.91514377495084e-09	1.09950762314576	0.165396049549518	7.51804091669898	6.58442784155815	6.65074392661564	8.12414495041724	9.54695697608911	9.2302261678299	14.4904387755327	17.8193123324907	21.6783817360095	30.4547941665018	25.3801866538986	8.02729997250201	21.9646227328867
"ENSRNOG00000039297"	"Mrpl52"	"ENSRNOT00000060193.4"	2.99914381848405e-11	1.92343149032034e-09	1.2029493029013	0.180986815011881	5.73400699287833	8.98304912029971	7.63320286410089	5.71341033058496	8.73761985592998	10.1311006543676	25.5423695350979	22.3928763853969	20.314757079567	31.6340296366786	21.0949826186558	8.23967656505663	24.1958030510792
"ENSRNOG00000019639"	"Pgpep1"	"ENSRNOT00000026597.6"	3.22188161376351e-11	2.05961380451456e-09	1.11958380084822	0.168712237137061	6.2731273886184	9.66556407051996	11.0345450647031	7.57339479334888	10.9222649287191	8.83234793942965	24.1336547061661	30.8239073611784	16.3965373040979	34.6611172386343	27.50443958287	9.60562335934414	26.7039312385893
"ENSRNOG00000053172"	"Ssr4"	"ENSRNOT00000083557.1"	3.40967439105239e-11	2.17265329284518e-09	1.15803576369323	0.17472675511953	5.9451405106663	20.6374657664711	23.8660075420224	18.3781382185873	13.291629746054	18.2912372014168	52.7568994045463	64.2882534507084	44.3028559256099	50.5012894069817	49.2696932103824	18.8928956949103	52.2237982796457
"ENSRNOG00000024733"	"Mnd1"	"ENSRNOT00000031179.5"	3.64662826690595e-11	2.31619334504087e-09	2.26366280936936	0.342058353240862	3.84242098965085	2.18599543139722	1.16465876682056	2.36202953468967	1.11648410555091	1.63608260900314	13.5603917787239	14.5232122603218	11.5786043492934	12.9251665449701	17.9912790826503	1.6930500894923	14.1157308031919
"ENSRNOG00000013752"	"Elavl3"	"ENSRNOT00000018416.5"	3.85069148349036e-11	2.43799211272615e-09	1.082282340827	0.163741232168412	7.02568591337464	17.8668445284871	18.6583122688217	20.6991147186345	21.8371420585545	18.3806596337156	48.4268713377525	64.4773528250922	58.9598671724071	48.4097154083469	38.4416143047188	19.4884146416427	51.7430842096635
"ENSRNOG00000061918"	"AABR07069008.3"	"ENSRNOT00000088140.1"	4.08370172601788e-11	2.57728398421963e-09	-4.54186955972341	0.688056918686728	1.95998179881628	2.47906999134498	2.20412960817306	2.4402216979344	1.98890161238641	1.92481743805527	0	0	0	0	0.0835134051802328	2.20742806957882	0.0167026810360466
"ENSRNOG00000008720"	"LOC103692173"	"ENSRNOT00000082996.1"	4.14024036458681e-11	2.5964285856018e-09	1.35801638738069	0.205792174330194	5.62685503003291	8.25555694539731	7.90296271668914	5.43717185481987	5.67511798711955	3.45527554100478	23.0848672761354	21.7573601063934	22.9641566681853	16.4168534385147	18.0136640645976	6.14521700900613	20.4473803107653
"ENSRNOG00000058909"	"Rps9"	"ENSRNOT00000090819.1"	4.132217064606e-11	2.5964285856018e-09	1.46683262754166	0.222272369235095	6.92282336151885	45.8535299892095	50.3662226820324	52.4151868572148	84.2268312198957	66.6095750683852	143.894682255727	296.69272753053	149.142754540418	426.785403201215	189.939780075635	59.8942691633475	241.291069520705
"ENSRNOG00000056246"	"Gls"	"ENSRNOT00000078073.1"	4.26333034475065e-11	2.66518667009223e-09	-1.5211163448938	0.23066003318368	5.32810078117568	4.90139609180295	4.38037736235524	4.79533471994717	5.85898075857292	5.63733370775607	0.437379116786118	1.45239039813973	0.825132633009161	1.29507117121821	1.36853897690582	5.11468452808687	1.07570245921181
"ENSRNOG00000012564"	"RGD1564541"	"ENSRNOT00000016993.5"	4.48786651198201e-11	2.79673115308011e-09	1.08925984736136	0.165364960053283	6.67909004212354	7.40127657932551	7.63646136366403	6.69893044303131	5.50238144445049	4.63529057344603	16.7869479225401	19.3709080071977	13.7520988325181	20.2818047337224	13.8951380623788	6.37486808078347	16.8173795116714
"ENSRNOG00000005203"	"Sec61g"	"ENSRNOT00000006906.3"	4.73243010510443e-11	2.93989239476033e-09	1.20229235597493	0.182743662835164	6.23419528632321	47.3394580066809	42.600722123623	37.2847530128761	60.7069550066698	89.6796665568326	152.617514891908	93.3011402646487	153.00968416544	217.91718045767	159.923918946085	55.5223109413365	155.35388774515
"ENSRNOG00000012830"	"Paqr8"	"ENSRNOT00000029696.3"	5.01595551295345e-11	3.1062872000062e-09	1.35033487574509	0.205515986547571	7.0512249730671	20.572893432454	21.9100313037356	15.3864412923019	24.2706953939366	16.5241605999788	59.1965374916089	82.5861492196337	39.6750151267816	119.94755903269	56.3192815565606	19.7328444044814	71.544908485455
"ENSRNOG00000019804"	"B3gat3"	"ENSRNOT00000026875.5"	5.06808253292563e-11	3.12879101417406e-09	1.08048718214282	0.164484702935055	7.3746638089642	28.2456577206242	34.1918086503641	32.3626177341073	29.3088424982513	32.9225755136565	65.7145033893265	72.8876653383788	79.4889114353007	106.406318447267	90.7962995753682	31.4063004234007	83.0587396371282
"ENSRNOG00000016322"	"Camk2n1"	"ENSRNOT00000021864.2"	5.20859624827204e-11	3.20555129975177e-09	1.77492375074436	0.270367836121864	4.97422873556159	12.2170811832168	22.9151558481167	16.4114764916289	14.0058592209925	5.61226186535315	72.7046330665018	86.027697134588	56.4723406863648	60.6721446740577	54.7238336231533	14.2323669218616	66.1201298369331
"ENSRNOG00000012081"	"Txn1"	"ENSRNOT00000016447.6"	5.4638385569966e-11	3.35222565585144e-09	1.07536815107064	0.163985183599543	7.22524461666358	335.970052870659	313.13592394727	309.60929600399	272.956964015285	281.18564809206	864.01572925885	744.42731431012	766.880257013386	708.170709407345	593.776205037717	302.571576985853	735.454043005484
"ENSRNOG00000058202"	"Ppp2r2c"	"ENSRNOT00000091927.1"	5.71246649449766e-11	3.49394902844013e-09	1.08363789818274	0.16541377265854	6.80467422855751	18.4638029983847	29.900442738738	21.5001708536539	24.5456574459893	19.6328005243355	45.019384982317	66.463808273148	65.6150046552357	71.3356796500327	50.1852232152688	22.8085749122203	59.7238201552004
"ENSRNOG00000004595"	"Pou6f1"	"ENSRNOT00000006095.6"	6.32452576194061e-11	3.85640390844237e-09	1.34155581762739	0.205260809658359	5.28757795108552	1.78858469817262	1.38014868007339	2.42554627182339	2.66554229645674	4.00756586611584	6.44361892142673	6.2759067530309	8.4175815070206	8.19549745339475	10.6279030720701	2.4534775625284	7.99210154138862
"ENSRNOG00000056955"	"Bicdl1"	"ENSRNOT00000089494.1"	6.43712510283619e-11	3.91302172278849e-09	1.41442127806255	0.216496867794671	4.96654076294296	1.35563942292936	2.01401299658832	2.42821033166968	1.70636194287809	2.20050068088318	7.59352501148898	7.20369221637862	6.16302795964596	6.24938855158704	7.90967909838054	1.94094507498973	7.02386256749623
"ENSRNOG00000018320"	"Rps15a"	"ENSRNOT00000092282.1"	6.50924193776236e-11	3.94475986179317e-09	1.6783070363398	0.256953862139875	6.39346316671266	16.6154769777254	18.6855799995496	11.5669034743126	29.2272162975313	20.6179890611154	72.8992092131331	77.0445807388392	50.6270219380142	191.841031493936	92.7581063625437	19.3426331620469	97.0339899492932
"ENSRNOG00000049128"	"Nktr"	"ENSRNOT00000071152.2"	6.66837458186921e-11	4.02887741124701e-09	-1.0833856186622	0.165961523512134	6.6679852433987	14.3286417737608	14.4080610259608	16.5363427797022	10.9314296417119	10.1651445998861	3.47836161625485	4.99922345100683	4.18779442122923	3.05823664502191	4.24423651589869	13.2739239642044	3.9935705298823
"ENSRNOG00000062298"	"Rpl13a"	"ENSRNOT00000027976.6"	6.74984742408613e-11	4.06570596969954e-09	1.61769385593005	0.247880153792007	8.08227063905696	110.590326909859	113.277017705293	89.4047329316079	47.0190606268693	60.3871911197309	501.328168819729	505.999577914082	387.747465487403	233.352723261548	242.310456544736	84.135665858672	374.1476784055
"ENSRNOG00000016288"	"Tcea2"	"ENSRNOT00000022073.7"	6.77208391994701e-11	4.0667390012603e-09	1.08203840834663	0.165813887063462	6.54049148780642	14.8612240956975	17.2712306682132	16.7180742394059	22.6958301650952	23.8898648447402	38.3205976434887	36.5802956694582	49.5143370925029	78.5134638927794	51.8858168436507	19.0872448026304	50.962902228376
"ENSRNOG00000032902"	"Ybx1-ps3"	"ENSRNOT00000050213.3"	7.0786687162522e-11	4.23800537613202e-09	1.63330804125093	0.250546531357234	7.86930427635072	51.7254414359694	64.8721525529783	55.0095625123718	26.9072199911082	23.93849196139	216.665965996913	280.980291689832	190.988096925858	169.561714787735	116.467221104152	44.4905736907635	194.932658100898
"ENSRNOG00000049402"	"Nbl1"	"ENSRNOT00000072299.2"	7.22900891008553e-11	4.31497799913147e-09	1.72076879142471	0.264090605986721	6.16421410129081	5.69310658967368	6.25622500688649	3.38772901328535	9.96366353079295	5.5942782262053	29.1174772245562	52.2306459003059	16.5526016991394	38.11437860324	21.3010880784716	6.17900047336875	31.4632383011426
"ENSRNOG00000011914"	"Dtnb"	"ENSRNOT00000077830.1"	7.46334617533986e-11	4.44147541011141e-09	1.45135275621979	0.222906523841576	6.3515559202777	5.31022101303175	4.6473447401838	7.73397844901128	8.75491337588808	10.7203406758819	16.6910502166668	20.8113960186884	35.3359440325386	30.3989404596579	37.938278475012	7.43335965079936	28.2351218405127
"ENSRNOG00000016187"	"Tmem67"	"ENSRNOT00000021839.7"	7.56517239291638e-11	4.4885934524079e-09	-1.32499057474007	0.203562785514494	5.23767567315692	4.01080324007574	3.92720282896833	4.16840410653642	5.25476248988615	4.72488685633841	1.47956134943365	0.639259142138414	0.916457270235177	0.928927984830371	1.47837225029324	4.41721190436101	1.08851559938617
"ENSRNOG00000003936"	"Pwwp2a"	"ENSRNOT00000067013.1"	7.61255868281198e-11	4.50322613185925e-09	1.07315257570459	0.164895828947538	6.66514452762497	7.87187433807431	6.67602892856359	7.77305642887993	10.2074021506888	7.74440242201345	16.0545973227097	18.8383290380896	20.7083601679052	29.4961213357556	20.9576141995254	8.05455285364402	21.2110044127971
"ENSRNOG00000048172"	"Rac3"	"ENSRNOT00000073886.2"	7.66365385848815e-11	4.51995918195415e-09	1.06816201961309	0.16415435763466	6.88952321851895	65.1700068800456	64.4377106064401	61.6077987173761	72.5450651101733	93.4239543062096	169.154751428544	182.785826470941	187.369387721287	211.40760920526	147.519738360899	71.4369071240489	179.647462637386
"ENSRNOG00000014928"	"Apba1"	"ENSRNOT00000020123.4"	7.90075910363992e-11	4.63306166987282e-09	1.14221287074374	0.175658091396596	8.30898613980503	24.7416815220336	26.1232837407981	30.9349098490328	34.7133263250044	38.3421118088876	60.3175924987717	73.7714669457804	82.6053156742458	133.305689829767	92.1215506469983	30.9710626491513	88.4243231191126
"ENSRNOG00000016411"	"Rps12"	"ENSRNOT00000022184.4"	7.90217916141198e-11	4.63306166987282e-09	2.06707860417147	0.317892225576739	7.27517860179015	94.9787131880204	118.732518763857	81.0684017036713	42.7177687883004	40.0663546136856	628.470903188647	834.352798113584	468.910686066018	348.267638971503	274.033113584482	75.5127514115069	510.807027984847
"ENSRNOG00000029336"	"Zfp180"	"ENSRNOT00000026077.4"	7.99539888233327e-11	4.67388848528609e-09	1.08791023795535	0.16735311579267	6.37378345242748	3.39303530370886	4.26458464274906	4.33543878073545	4.50300893477296	4.79116607795181	9.45698254082976	9.98022932926214	9.2712746091328	12.6783950738226	15.8531069199373	4.25744674798363	11.4479976945969
"ENSRNOG00000014509"	"Sacs"	"ENSRNOT00000019551.6"	8.25525836644919e-11	4.81160161905658e-09	-1.08060966799608	0.166353230345603	7.61225851353981	10.865334507082	10.7828011248375	10.8050129521411	10.7103213919363	8.74240893238365	2.75167725891131	2.35217221158179	3.37184414856543	3.73764245157725	3.70681709012039	10.3811757816761	3.18403063215123
"ENSRNOG00000019990"	"Rex1bd"	"ENSRNOT00000063780.1"	8.44703807115565e-11	4.90894291660092e-09	1.32962478256725	0.204796595806772	5.14430368082537	11.013108130702	11.6318562039906	10.8687102793557	8.49634484109678	9.92709404217264	32.0221618607034	36.5046421633195	41.2468870683929	27.8943475613125	34.0879610442477	10.3874226994635	34.3511999395952
"ENSRNOG00000018681"	"Nes"	"ENSRNOT00000025314.3"	8.56204519615733e-11	4.94676529598396e-09	1.86495005464326	0.287340681510966	7.37829275486876	4.91125491178816	10.3947333955564	4.91902998969685	5.53652396531024	3.08428070900945	25.9841421781626	58.2614552771808	16.4211772998877	40.0933874186751	27.2992931084474	5.76916459427222	33.6118910564707
"ENSRNOG00000012508"	"Slc39a8"	"ENSRNOT00000033413.5"	8.54186130897175e-11	4.94676529598396e-09	1.47327471962816	0.226981184689735	5.53481704909599	1.95654043500864	2.48094994240937	1.15857534282242	2.24145423931949	1.67789036245159	7.40874938500346	5.93195650581376	4.33985160606746	12.9847193833634	7.68642588756969	1.9030820644023	7.67034055356355
"ENSRNOG00000008764"	"Otud5"	"ENSRNOT00000006233.7"	8.92474534262515e-11	5.14132786205822e-09	1.06484633153314	0.164223564843684	7.29406311136606	13.4474163387782	14.2995070537255	13.7596497370054	16.2330945917299	16.0992908832481	28.2518605516953	35.1514552686273	37.1798638085894	60.4059825294175	35.610997854333	14.7677917208974	39.3200320025325
"ENSRNOG00000061425"	"Cox14"	"ENSRNOT00000091207.1"	9.33597305297764e-11	5.36263704321327e-09	1.337531386055	0.206494240939556	5.10486976190007	95.8806451963808	134.730539214957	108.05046457087	212.55729586289	198.103879137686	286.019176750345	326.145936990932	253.970847877685	803.164119766474	486.960337346824	149.864564796557	431.252083746452
"ENSRNOG00000054056"	"AABR07001662.1"	"ENSRNOT00000092209.1"	1.02760295051603e-10	5.8855513498197e-09	-1.70320641920703	0.263538647730341	4.48784976767028	2.40928536560357	2.39251813710363	2.89861056578763	5.01180147853156	4.6579026236527	0.507786687581173	0.437045145594479	0.779180560566693	0.303552482730748	0.785260870147696	3.47402363413582	0.562565149324158
"ENSRNOG00000017310"	"Rnpc3"	"ENSRNOT00000088533.1"	1.1677082396354e-10	6.66872454894947e-09	-4.59117700129235	0.712531536420157	1.60244132008623	1.44976682989683	0.624102710890358	0.931672229512285	1.81855452116088	2.24961264866948	0	0	0	0	0	1.41474178802597	0
"ENSRNOG00000026616"	"Ndufb2"	"ENSRNOT00000030892.4"	1.21929509410285e-10	6.94332496547016e-09	1.23470631446856	0.191816594315216	5.84562713709691	24.0962075032799	26.329649878119	28.4556377543471	48.5472898365816	47.5040302095207	104.323972478931	94.0947128759665	90.4028581787862	156.04959986157	66.6060690244502	34.9865630363697	102.295442483941
"ENSRNOG00000018653"	"Pfdn1"	"ENSRNOT00000025353.5"	1.34655512571234e-10	7.64604095307779e-09	1.3363827591224	0.208100347829329	6.56887440095814	24.0260812000413	22.3742026845455	23.9438634748804	13.7567445094188	13.1532242293331	67.8800949336542	79.8635985197353	88.2023754837875	53.7901330101015	39.0966832141529	19.4508232196438	65.7665770322863
"ENSRNOG00000024870"	"Anks1b"	"ENSRNOT00000059269.5"	1.40415167318778e-10	7.95030677358924e-09	1.09718318953257	0.171022237483441	8.03656924817218	24.6842735011476	22.1975262973597	28.2074204318798	22.5596450909132	22.8379690710091	61.2224765191927	67.2968193068599	71.4801362308164	56.0369007048782	65.3480165059161	24.0973668784619	64.2768698535327
"ENSRNOG00000000786"	"Rpp21"	"ENSRNOT00000091967.1"	1.51393296388324e-10	8.54746710691571e-09	1.75603011538897	0.274209844051068	4.51519174381676	2.60149892020494	3.42170754234807	3.51809786822474	6.76048159049098	10.9052559951845	21.0439731121047	20.0612567923644	25.043214927953	37.7923146277289	19.6109569032745	5.44140838329065	24.7103432726851
"ENSRNOG00000060879"	"LOC100910996"	"ENSRNOT00000083450.1"	1.53029731459553e-10	8.61531303503967e-09	1.28395144239194	0.200544597755306	5.22624393411851	4.60281815558019	5.9190493791782	4.07873452921061	8.37257147289391	5.44517727373959	17.0937096014134	16.4824940098337	15.5328867197119	31.6099527137134	12.2671811288278	5.6836701621205	18.5972448347
"ENSRNOG00000003428"	"Rufy3"	"ENSRNOT00000092172.1"	1.57068378880079e-10	8.81763191010348e-09	-1.68175931332511	0.262842794429962	4.6090284912345	3.23996949917751	2.89699600069251	2.41563572622768	5.49033673514568	5.53453003422949	0.967147925205882	0.734333170677111	0.657774663619515	0.380548277808575	0.459651937207251	3.91549359909457	0.639891194903667
"ENSRNOG00000019000"	"Limk2"	"ENSRNOT00000057673.3"	1.62101632901494e-10	9.07448604296299e-09	1.17242178862315	0.183376352898113	5.84342850161057	2.47432230929494	2.19716138452803	2.06067149105015	2.97333971338317	2.63883341451311	4.10979131997253	7.28818002155657	8.21699493012732	11.0471533935603	6.43346129572054	2.46886566255388	7.41911619218745
"ENSRNOG00000017235"	"Atp6v0d1"	"ENSRNOT00000092910.1"	1.62890299392593e-10	9.09294947341695e-09	1.33575606465719	0.208947412210093	5.35478869743528	9.44492976137247	8.57977432954388	9.07289867441765	5.25344570865758	5.84661878973055	35.9708987402058	20.9694067970258	36.4620300873667	17.2549985252405	20.3294234933308	7.63953345274443	26.1973515286339
"ENSRNOG00000011214"	"Polr2f"	"ENSRNOT00000015009.6"	1.76965537412215e-10	9.85091588454456e-09	1.16836282353549	0.183125928812227	5.65461299981788	18.2431229909485	18.4967796087206	13.1947536344229	17.4119909850723	19.2531528849618	55.9373427524326	47.7109247487163	48.1183230401052	48.6163200761673	41.7489547502351	17.3199600208252	48.4263730735313
"ENSRNOG00000009592"	"Cyb5r3"	"ENSRNOT00000064700.3"	1.83111257120497e-10	1.01644699785907e-08	1.06393283643158	0.166894676248097	7.69669999271082	28.573185523352	27.32453455481	28.129895843618	45.3079714128077	49.9062790899351	101.170283322484	86.4072964513012	76.8541885264024	110.051029912011	75.9459183187401	35.8483732849046	90.0857433061878
"ENSRNOG00000001420"	"Fis1"	"ENSRNOT00000083471.1"	1.8780224791522e-10	1.03957462204914e-08	1.06625945675255	0.167361452334065	6.448911191776	25.9925691404872	25.0106855084608	20.746245746448	22.7091441915824	20.6459794413538	73.3497693899484	66.2775500596098	49.3508263104921	74.0013704958665	39.3487531755287	23.0209248056664	60.4656538862891
"ENSRNOG00000019077"	"Lipa"	"ENSRNOT00000078279.1"	1.89591343499385e-10	1.04655477830844e-08	-3.79681336913883	0.596088750194969	3.07919982864705	2.48515988701025	3.15395581783993	2.84540656493176	2.62797069732872	0.930367153034075	0.0619214168843619	0.0458629017707215	0.0473730793417602	0.122947359995325	3.84022688078064e-05	2.40857202402895	0.0556286320521953
"ENSRNOG00000002106"	"Usp46"	"ENSRNOT00000002879.7"	1.93909473374657e-10	1.06741778718488e-08	1.08420664084944	0.170309700717995	7.98619490010168	18.682561482361	16.5045982057044	19.9039684693529	18.3995052108316	16.929351132935	39.437973478669	42.1460173362754	43.2789460405918	69.1680409791012	48.9222207918378	18.083996900237	48.590639725295
"ENSRNOG00000015732"	"Bcl2l2"	"ENSRNOT00000020409.4"	2.04751269616362e-10	1.12376121720915e-08	1.06546768529397	0.167586067685562	6.3712427343053	4.92211704352222	3.90682750525592	5.53838632595755	4.16796766898191	5.66783006366001	9.59184868888506	11.5022106929947	14.6344664677582	11.6842232800064	15.4640705662271	4.84062572147552	12.5753639391743
"ENSRNOG00000054151"	"Pus10"	"ENSRNOT00000083763.1"	2.05279083932842e-10	1.12376121720915e-08	1.27831188302378	0.201076574642075	5.20829283274549	2.07127443978949	1.52984305109237	1.46452600810458	1.74593422515593	1.5655815840756	4.45584913911521	4.20166709675974	5.6353976724918	7.02468675962765	5.8120582653008	1.67543186164359	5.42593178665904
"ENSRNOG00000048898"	"Wasf3"	"ENSRNOT00000092340.1"	2.06436360914712e-10	1.12698329593577e-08	1.47503946613812	0.232053067926954	5.48550926426314	9.72042600986653	11.3970993701114	8.42330704734079	5.07991379949754	6.3774587024935	37.8780883679649	47.1820799545654	33.7434735677208	23.4774537322483	18.3077735912899	8.19964098586195	32.1177738427579
"ENSRNOG00000024128"	"Aco2"	"ENSRNOT00000038612.5"	2.09118126081677e-10	1.13848733641774e-08	1.22275292764563	0.192423431104237	8.97873231333823	68.1797538552536	67.0419422505513	73.9130125991762	52.0064288603287	63.458288878318	163.517794682346	216.973286099246	230.652196267753	230.128415259592	149.897295260931	64.9198852887256	198.233797513974
"ENSRNOG00000061231"	"Selenom"	"ENSRNOT00000081123.1"	2.19859054785644e-10	1.19368407909236e-08	1.06658327814845	0.168050917618303	6.33119261272672	24.3598642209594	26.1771601097694	32.6919292620836	34.7079833237889	46.5081791407743	67.3183159456501	60.6484124137266	85.0938820616386	123.198670873809	83.2142463004538	32.8890232114751	83.8947055190556
"ENSRNOG00000004686"	"Spop"	"ENSRNOT00000006230.5"	2.41132328815614e-10	1.30560638255164e-08	1.08953747466268	0.172053343272247	6.11732796139163	5.85136202074807	5.44823764767433	5.90937014334539	5.20788629968341	5.13726680802327	15.1189444548657	12.934708333383	14.8102247599726	14.3318748361341	15.7828774686311	5.51082458389489	14.5957259705973
"ENSRNOG00000012550"	"Uqcrh"	"ENSRNOT00000016751.6"	2.48873153023879e-10	1.34384721348071e-08	1.28651013774256	0.203314636312882	7.34406476877134	116.569256818374	119.28577982213	134.216618424328	82.1911834252825	95.8784052584321	406.369086219514	364.850785642461	503.027849009911	279.103829966461	213.776183436754	109.628248749709	353.42554685502
"ENSRNOG00000005360"	"Dhrs7b"	"ENSRNOT00000077868.1"	2.51615499674863e-10	1.35275527972505e-08	-4.41026168932758	0.697165547731465	1.51198366410385	2.48139617314862	2.01036466088272	1.46831467754241	2.79109687110067	1.9432678434325	0	0	0	0	0	2.13888804522138	0
"ENSRNOG00000050169"	"Pet100"	"ENSRNOT00000071928.1"	2.51888125457205e-10	1.35275527972505e-08	1.07627174360285	0.170139430376807	6.17933812490489	10.6297294901579	12.5406632872098	11.209169120296	19.6941567183087	12.9497952841593	32.5683524022322	26.6070437087836	32.5242563625804	52.2224761747081	30.6323925750859	13.4047027800263	34.910904244678
"ENSRNOG00000052620"	"Rack1"	"ENSRNOT00000084232.1"	2.55071304801223e-10	1.36614812087726e-08	1.0598941163349	0.167601797637705	7.77073758777014	65.8508226242169	69.6901345630405	53.5618110731557	61.0819871888446	71.6469148890852	160.769438769345	195.871300590394	116.949841119942	194.632543583195	162.906442510645	64.3663340676686	166.225913314704
"ENSRNOG00000038074"	"LOC498555"	"ENSRNOT00000057931.4"	2.56874084961862e-10	1.37209534816421e-08	2.06303481328708	0.326285263398997	6.24179368847099	54.9018751733565	59.0752603680888	48.4842828931671	18.0340668604844	24.204516445888	311.291741442153	405.111099979527	199.220953584525	255.108180288266	145.800527930478	40.940000348197	263.30650064499
"ENSRNOG00000010765"	"Vcl"	"ENSRNOT00000015179.7"	2.73115810333089e-10	1.45492903585237e-08	-1.06498373086711	0.168688439683806	6.42717076450042	11.2044142486791	10.6843844675958	8.3381781577004	9.23402441461683	8.9925784169774	3.11210854802271	2.86806362596516	2.70130384679887	2.49106106204459	3.76863861912966	9.69071594111391	2.9882351403922
"ENSRNOG00000003594"	"Tmem183a"	"ENSRNOT00000005272.5"	2.85148760791364e-10	1.51399150890423e-08	1.03761251998275	0.164526862243907	7.07966810958807	25.707123579851	29.5469755468962	27.790450582206	15.4856678569211	18.2519243336504	58.9780665242876	43.0332155197244	74.3992877190328	61.2999150508271	50.8582121370495	23.3564283799049	57.7137393901843
"ENSRNOG00000057840"	"AABR07026473.1"	"ENSRNOT00000085640.1"	2.85730849437443e-10	1.51399150890423e-08	-1.86029116648296	0.294987953943707	5.1254382271377	3.83825265636407	3.99407837542519	4.06429193300259	12.4534475523626	10.507101578107	0.570184458201322	0.734262344451522	1.0517822654138	0.750408822843051	1.22160967198815	6.97143441905229	0.865649512579569
"ENSRNOG00000046519"	"AABR07072748.2"	"ENSRNOT00000073802.1"	3.06566592374117e-10	1.62006137628743e-08	-4.24728264847904	0.674662206772005	1.43049414367958	25.2656459982042	30.1353538153388	28.625254203255	56.4318844842256	65.5172422802912	0	0	0	0	0	41.195076156263	0
"ENSRNOG00000004555"	"Sec14l3"	"ENSRNOT00000006116.3"	3.09097034247372e-10	1.62908934246813e-08	4.45240527955945	0.70738831965814	2.34810920341637	0	0.0175490343957787	0.478352061066844	0	0	2.77903554353158	4.77805277728964	4.72141842704323	1.86310004912192	1.82276742835307	0.0991802190925245	3.19287484506789
"ENSRNOG00000010396"	"Eya3"	"ENSRNOT00000082945.1"	3.44879037277446e-10	1.8080602861712e-08	1.27648248066576	0.203354465879936	5.21716980947974	1.94804266149632	1.92986344280435	2.53362078100372	2.93681138702805	2.5192255176087	6.14639314131949	6.13067911449808	5.81486520083866	10.0507882565193	10.685761843198	2.37351275798823	7.76569751127471
"ENSRNOG00000054031"	"LOC102549726"	"ENSRNOT00000087471.1"	3.44549863794072e-10	1.8080602861712e-08	1.46015265500739	0.23260917574104	6.11690958008108	13.7933835819461	14.1605685633295	13.2509904050792	26.1594972791887	26.2514464015788	44.0133392153571	54.0108197829098	52.3672540172161	115.475185885317	95.8916754483424	18.7231772462245	72.3516548698285
"ENSRNOG00000026260"	"Rpl11"	"ENSRNOT00000030043.5"	3.55059151182e-10	1.85651904986113e-08	1.65344997074457	0.263598654195885	7.22813803708936	106.811842054623	123.430703170951	108.37667749711	49.9374493032102	53.2616631299309	389.406921326506	499.534952318198	378.115577319955	454.676365473168	214.48866470043	88.363667031165	387.244496227651
"ENSRNOG00000000461"	"Brd2"	"ENSRNOT00000000535.5"	3.61040046982793e-10	1.88282384501527e-08	1.05804390695545	0.168746941067192	7.73991767797863	19.2421057637826	22.1138019787793	17.9810217002265	15.9537666310599	16.9691029056868	35.4325347978976	51.8027939934891	44.0707833024691	59.1323622018668	48.2300047973939	18.451959795907	47.7336958186233
"ENSRNOG00000039819"	"AABR07035338.1"	"ENSRNOT00000092631.1"	3.68971677012999e-10	1.91913693526682e-08	1.22253232002192	0.195086431690594	5.33402331206068	12.8392327461867	10.2703170740628	12.1718080271928	14.7185426649095	13.0227271142175	35.7385155056207	33.3036782864972	33.2544344323351	45.089415396473	39.4728714724535	12.6045255253139	37.3717830186759
"ENSRNOG00000061248"	"SNORD113"	"ENSRNOT00000077147.1"	3.70458971114118e-10	1.92182864674568e-08	-4.36828684433216	0.697142085768797	2.5487164660482	358.382401932983	132.476589569609	286.472411996973	64.8460703869975	74.5666137755464	0	7.72866472914665	0	8.35237770733893	0	183.348817532422	3.21620848729712
"ENSRNOG00000025040"	"Gng10"	"ENSRNOT00000020707.7"	3.80941935863694e-10	1.97105126449369e-08	1.13690361829343	0.181566338807855	6.77514276250033	33.5624266958946	32.7818779136668	30.047803986582	20.82880926153	18.3242096892862	90.5527518035366	81.4042955252147	80.5530459581795	74.3002074756276	45.3894882931225	27.1090255093919	74.4399578111362
"ENSRNOG00000037684"	"RGD1566159"	"ENSRNOT00000029656.5"	4.00795439039635e-10	2.06837583735637e-08	1.68273097983464	0.269076905034963	7.14572703387964	4.81866460127499	4.53610296125524	4.95138283339935	9.78910305577665	10.030546795081	20.4954224176699	20.4571388842037	27.58742033673	47.6995213767488	48.9826003626415	6.82516004935745	33.0444206755988
"ENSRNOG00000002935"	"Ankrd40"	"ENSRNOT00000067751.2"	4.14493464932608e-10	2.13351090768039e-08	1.02420715893638	0.163913277823309	6.93538937436669	9.58900347024068	9.47904843818384	7.02300162063555	9.99518890862463	9.1040567972634	22.3844031357589	23.6475527420032	16.6578465464759	29.3773597946911	21.0941901055414	9.03805984698962	22.6322704648941
"ENSRNOG00000037661"	"Tmsb15b2"	"ENSRNOT00000057140.2"	4.18424382867526e-10	2.14816476561807e-08	1.76160584222269	0.281992515633515	6.40328753064756	72.182652814744	66.2688753510931	67.0933951209995	29.0355408441086	48.0923889669601	340.590950151844	252.260138598171	427.73873062968	207.070403425794	174.209890700077	56.5345706195811	280.374022701113
"ENSRNOG00000015294"	"Paxx"	"ENSRNOT00000020806.7"	4.37775219170163e-10	2.24170323470158e-08	1.31260358242197	0.210355599967966	5.04484677679393	4.21004059504943	3.59818614971089	3.72466845682429	4.90324165710383	6.48129907648922	12.2870704827133	12.4987267480295	11.0728951810189	23.4260909946801	17.4853376205654	4.58348718703553	15.3540242054014
"ENSRNOG00000028884"	"Atp5mg"	"ENSRNOT00000050878.4"	4.56101801665035e-10	2.32952819680309e-08	1.50949736652904	0.242158537292614	6.55033644888431	68.3542691137109	56.9394213626544	66.5179681709657	31.7863668389127	58.8199347044573	258.475947959375	232.420558198402	319.994208846952	141.391539952951	157.819154692658	56.4835920381402	222.020281930068
"ENSRNOG00000047014"	"Homer1"	"ENSRNOT00000071804.3"	4.74654222218573e-10	2.41805211354896e-08	1.83036625994066	0.293927891675795	5.76305505705233	11.4367811469307	6.6433565203524	9.14198451107937	3.62650888563807	4.68981623259333	57.8132585691051	35.6525022570095	53.0182132454699	20.1714374660536	27.7084931657535	7.10768945931877	38.8727809406783
"ENSRNOG00000060061"	"Sowaha"	"ENSRNOT00000089495.1"	4.9119190387923e-10	2.49588460491659e-08	1.35516094279911	0.217805246203078	4.97215448968549	1.89247863303238	1.99326730632254	1.77285820508828	3.00427488929053	3.28746540429063	4.74590748848695	7.32868525003354	6.68204963511131	12.9697058156542	10.8338173209359	2.39006888760487	8.51203310204438
"ENSRNOG00000016780"	"RGD1310951"	"ENSRNOT00000022866.6"	5.12774244569093e-10	2.59888675310121e-08	1.39705627817536	0.224782588333316	4.80569014181866	1.35710415088985	1.27387397467225	1.67944281002656	0.859905113296164	1.32000897265843	3.73855076655139	3.80636346120869	5.68926766114834	4.15939149002014	6.07221556490366	1.29806700430865	4.69315778876644
"ENSRNOG00000061775"	"SNORD113"	"ENSRNOT00000080943.1"	5.2001706922836e-10	2.62887200533123e-08	-2.47653625537009	0.3986092782661	6.18553978266367	4182.11768314523	3048.83550240066	4566.8347201451	1078.97395316585	746.852986883834	243.956210364862	245.661964163739	273.560779897083	129.016577749305	53.9056988061372	2724.72296914813	189.220246196225
"ENSRNOG00000054289"	"AABR07061448.1"	"ENSRNOT00000079490.1"	5.22177831850772e-10	2.63307839536558e-08	-4.13967479632942	0.666368517811158	2.29550661496937	11.4910871660846	15.051365913353	21.0135941369076	31.7380670721127	35.3417727622229	0	0	0	0.377748984527809	3.1100727791526	22.9271774101362	0.697564352736082
"ENSRNOG00000014658"	"Zfp423"	"ENSRNOT00000020028.6"	5.72715340673775e-10	2.87431444702917e-08	1.14269340418701	0.184371930292248	5.87368906937051	2.34423700599912	3.15470216108568	2.00143598929603	2.052980782719	1.27857195598545	5.06660001903677	7.97039816566301	4.91507535912839	7.37674288781912	4.56356635980449	2.16638557901706	5.97847655829036
"ENSRNOG00000009580"	"Lca5"	"ENSRNOT00000086426.1"	5.729193150207e-10	2.87431444702917e-08	5.17277238019424	0.83462690190441	2.29797596437983	0	0.00169065805198261	0.0648354020534071	0	0	5.196660429778	1.56003395242371	4.77618266583959	4.14387807265876	0.90047141443538	0.0133052120210779	3.31544530702709
"ENSRNOG00000056278"	"AABR07050914.1"	"ENSRNOT00000086219.1"	6.46155056527703e-10	3.23354918060846e-08	-4.16658490724884	0.674342244871129	1.39014527306448	0.97393685759578	0.560996022679571	1.59805353818981	1.59228617981595	3.64089151627788	0	0	0	0	0	1.6732328229118	0
"ENSRNOG00000056050"	"AABR07057798.1"	"ENSRNOT00000087238.1"	6.64969114758821e-10	3.31931812271425e-08	-4.19367346441946	0.679224770620649	1.96197795281238	11.7935797776695	8.80475715301073	12.3031750616397	6.06628269164911	3.72901060529855	0	0.883481368786936	0	0	0	8.53936105785352	0.176696273757387
"ENSRNOG00000002036"	"Paxbp1"	"ENSRNOT00000002800.6"	6.84889989070316e-10	3.41016706366996e-08	-2.38194802667169	0.386081956039327	4.44384906870458	5.91700069465217	5.52751745796309	5.27938577255387	4.37541776337258	4.42730199617283	0.521840316076618	0.858441905681303	0.758371106780487	0.0935015816854385	0.346665871198692	5.10532473694291	0.515764156284508
"ENSRNOG00000004521"	"Prpf39"	"ENSRNOT00000066702.4"	7.20170107815585e-10	3.57400585723446e-08	-1.3803843961328	0.224030461284906	4.95641060863149	7.04804623184768	5.13118963754629	6.96159600420579	6.27551916966828	5.03995571740712	1.4385537731539	1.59976024621591	2.32773363190436	1.26560228135685	0.637481705689468	6.09126135213503	1.4538263276641
"ENSRNOG00000007775"	"Cmpk1"	"ENSRNOT00000081051.1"	7.23205504743917e-10	3.57400585723446e-08	-4.20562922229326	0.682629344049301	1.40966743058668	0.681072802635409	0.68339861788994	0.587887574740316	1.36876103912488	1.59115006404328	0	0	0	0	0	0.982454019686765	0
"ENSRNOG00000013520"	"Mat2a"	"ENSRNOT00000084782.1"	7.22482293661663e-10	3.57400585723446e-08	-1.0137823801473	0.164546081148205	6.93536781331247	22.4927977060941	25.9567114113757	20.4536113696749	31.9138424303209	26.3963878965301	7.00459917701989	9.52970140465078	6.74428816219913	8.14271709739762	9.6400196139891	25.4426701627991	8.2122650910513
"ENSRNOG00000000105"	"Cplx2"	"ENSRNOT00000000117.2"	7.61504053246873e-10	3.75391189631674e-08	1.31979156643892	0.214504309759968	5.11176164648763	3.93741591539943	7.80080352765959	6.35199685228747	7.86339071850926	3.71009501200751	16.7808368952775	21.5950374822097	16.8689218926996	28.9771408993589	12.78051698551	5.93274040517265	19.4004908310111
"ENSRNOG00000007034"	"Hipk2"	"ENSRNOT00000064891.2"	7.72473294882253e-10	3.79853679520636e-08	1.33327823857048	0.216776184008547	6.73329559605344	3.40953088583463	4.54320180107084	3.36332177742299	5.8074180293102	4.83321114642238	11.0751026142153	20.6603740980961	8.30633716338209	22.6144496038291	15.1102794188334	4.39133672801221	15.5533085796712
"ENSRNOG00000020075"	"Eef1g"	"ENSRNOT00000027305.7"	7.96982770004529e-10	3.90935830524251e-08	1.35431207001129	0.220373613568339	8.32724455624577	105.917198382319	112.128587619236	90.1458168368972	56.6146570467382	59.0694382945372	352.815944322474	443.30786191616	280.115360494161	223.173735951461	174.510134781468	84.7751396359455	294.784607493145
"ENSRNOG00000018642"	"Leng8"	"ENSRNOT00000025338.7"	8.24034844214131e-10	4.03207370562751e-08	-2.28510418662073	0.372153028814031	4.92076445096984	1.86861259584454	1.88823405770079	2.5506288565438	7.84965573488201	9.14651388848432	0.482940723337379	0.36250535125641	0.274255521182342	0.224309068206979	0.350457625536023	4.66072902669109	0.338893657903827
"ENSRNOG00000016892"	"Nr2f6"	"ENSRNOT00000022898.3"	8.35902868910653e-10	4.08007072738976e-08	1.16820358266166	0.19032454524186	5.44671446464416	3.53730143233012	3.83626736257821	2.77216819597076	3.99341757794851	5.61418746342996	9.00417127678233	8.42565400157584	9.46938472420469	14.5047023190752	15.5538282237302	3.95066840645151	11.3915481090737
"ENSRNOG00000053285"	"Mllt6"	"ENSRNOT00000092122.1"	8.70906702190229e-10	4.24048110990265e-08	2.03958580961971	0.332644196231438	7.41115321096889	4.88665025444105	5.5081527828753	4.98185716067228	7.98138795725727	10.2597513426459	21.3881345982729	31.3622752678163	31.5531796347563	85.9011523753589	91.5386085315233	6.72355989957836	52.3486700815455
"ENSRNOG00000051423"	"AABR07024790.1"	"ENSRNOT00000080746.1"	9.08782773592661e-10	4.41405593732494e-08	-4.28881732376286	0.700254109746666	2.0954906566327	58.2811079316889	70.654902326455	89.3577341590283	391.492905432116	396.624915989775	0	0	0	3.10608465470313	5.1781951812462	201.282313167813	1.65685596718987
"ENSRNOG00000025388"	"Mrpl33"	"ENSRNOT00000034712.4"	9.96104849478766e-10	4.82635936482169e-08	1.2615362861755	0.206469632427519	5.18237921771481	102.574202195071	134.20260934483	94.5933415344039	115.469456576889	116.619321987954	306.382205850147	301.253376871783	350.226942889309	336.35860490123	224.17532125455	112.69178632783	303.679290353404
"ENSRNOG00000030404"	"Arrb1"	"ENSRNOT00000043554.4"	1.02111810166233e-09	4.93548717576644e-08	1.00117450844187	0.163963709266641	7.01057580989027	10.4525246989597	12.5487118670363	13.809249524911	12.0119896765277	13.0592716071574	21.6561119901479	30.0778595540991	30.4079951544339	39.8741831476833	30.0278626944025	12.3763494749184	30.4088025081533
"ENSRNOG00000020857"	"Ppfia1"	"ENSRNOT00000092748.1"	1.03355833239291e-09	4.98346118565215e-08	1.67895416440196	0.275051724977684	6.3851703981461	4.01556134987957	3.01451474200363	3.13043960337332	2.33004115715886	1.13056121257463	14.7161208052204	8.92426949080529	19.6722604618817	7.56620226402235	12.8335115850967	2.724223612998	12.7424729214053
"ENSRNOG00000043105"	"Lyrm2"	"ENSRNOT00000065926.3"	1.0977364277057e-09	5.2800589290883e-08	1.14009233787466	0.187068766236481	5.58207962913801	6.9900666656003	6.61084493908229	5.46489283169448	3.96798344880332	3.60039385048598	17.0191488285249	16.9774121857025	18.4729475539342	11.6424872026629	9.62871686270439	5.32683634713327	14.7481425267058
"ENSRNOG00000033688"	"Cep170b"	"ENSRNOT00000030246.7"	1.12634278490696e-09	5.40453631198576e-08	1.58023663150209	0.259463846038316	8.13797830042044	8.29039805496032	8.43189604889635	9.78748746567991	12.4984336186638	17.451337678066	28.0365521553992	37.1808166374152	41.2980119880928	52.8358422347247	100.201295942491	11.2919105732533	51.9105037916246
"ENSRNOG00000000519"	"Stk38"	"ENSRNOT00000092532.1"	1.15262654599015e-09	5.51729474924803e-08	-4.09678039843494	0.673071013303951	1.35524301865753	3.26076542241446	2.76878310017643	2.72731058199994	3.02469904345768	3.50280604634676	0	0	0	0	0	3.05687283887905	0
"ENSRNOG00000014508"	"Mgll"	"ENSRNOT00000077231.1"	1.18652475819143e-09	5.66587015254928e-08	1.17190123266408	0.192681814890438	5.5763075181203	6.10800535204637	5.90039250064806	6.35231858289816	8.11370627795658	9.10369710102568	17.6063889138968	11.500008016313	22.5464410321219	32.8129993205808	21.6356230655079	7.11562396291497	21.2202920696841
"ENSRNOG00000054489"	"AABR07042821.1"	"ENSRNOT00000078975.1"	1.23448455594763e-09	5.88071645317648e-08	1.89134356931503	0.311296434821551	6.23051308555233	35.1307842719381	35.5617157319508	34.488662662942	81.2631247890174	92.3209284477553	173.843776642728	241.425496863026	142.494135463516	713.899530925085	410.585578736536	55.7530431807207	336.449703726178
"ENSRNOG00000000638"	"Zfp365"	"ENSRNOT00000057992.4"	1.25170287443452e-09	5.94844025483668e-08	1.33847944879159	0.220381101066456	6.94332426547855	4.81422389164667	3.54233175005681	6.68008527919778	4.99490922901509	5.85660625723581	12.0988291251399	10.2887872936563	22.0713824648927	19.6080408004587	28.1876589476634	5.17763128143043	18.4509397263622
"ENSRNOG00000013604"	"Gpx4"	"ENSRNOT00000093376.1"	1.35447796896728e-09	6.42145691651305e-08	1.35332379939181	0.223291352883476	7.57246827162474	90.5074329800054	90.9598077995789	70.0913961841394	41.9214699882626	55.4664943625675	284.760946759232	295.011827759755	284.500867026378	188.709191882606	136.754447008422	69.7893202629108	237.947456087279
"ENSRNOG00000001235"	"Gna12"	"ENSRNOT00000001654.7"	1.3634311857531e-09	6.43312281144504e-08	1.11773584202257	0.184452821253643	7.83744808509624	17.5506098184827	20.2266988734286	17.2268081012449	26.4530917134804	26.11350493901	38.7311153867334	49.5682901228679	48.5635201547754	73.7850752338906	92.0694434056675	21.5141426891293	60.543488860787
"ENSRNOG00000013300"	"Atp5if1"	"ENSRNOT00000018038.5"	1.36060010694408e-09	6.43312281144504e-08	1.16459223333283	0.192174629711204	6.29987195412729	45.1429716076451	49.3452759346235	49.3980989915196	38.6467028662911	39.4717545145972	153.258066275952	129.932196030326	177.623661471603	99.9444288270744	77.1126890549964	44.4009607829353	127.57420833199
"ENSRNOG00000021497"	"Akt3"	"ENSRNOT00000085648.1"	1.4042899698437e-09	6.61016967515265e-08	1.04295011312474	0.172246465856523	6.79206135797312	14.7418126344159	15.052226158508	13.1878401750664	21.7202051859181	16.1895337970242	34.4735378975391	29.7081918225189	31.6051736437577	64.393113898106	50.1671003692225	16.1783235901865	42.0694235262288
"ENSRNOG00000060974"	"AABR07065448.1"	"ENSRNOT00000091301.1"	1.41537140361311e-09	6.64654386383908e-08	-3.99927615887235	0.660631000993101	2.28385755909426	0.741411836089288	0.767668683532999	1.1236844425242	1.0522819346451	1.13209874638537	0	0	0	0.0546694401976533	0.0680314959949213	0.963429128635391	0.0245401872385149
"ENSRNOG00000005934"	"Mlip"	"ENSRNOT00000064754.3"	1.49275337307347e-09	6.99335545962105e-08	1.85856723120829	0.307447896515726	4.16398557241185	4.33378587466829	2.39581228247605	2.9983576017279	1.20779248669035	1.17666441678255	13.7843664732232	12.8701041692568	19.4006689505881	9.76405472412698	8.12806925087624	2.42248253246903	12.7894527136143
"ENSRNOG00000019069"	"Nxf1"	"ENSRNOT00000026033.4"	1.56251901057266e-09	7.30293378125436e-08	-1.05077014839293	0.174032622923913	6.06412821859363	14.6612542243331	12.3536863116004	14.3016001858764	21.2322659084994	21.7736463003388	4.54600461512506	3.9867412293963	4.30313430882028	6.39268469117756	6.92547658501785	16.8644905861296	5.23080828590741
"ENSRNOG00000003201"	"Rps4x"	"ENSRNOT00000076978.3"	1.62695458976639e-09	7.5862021424472e-08	1.47870313770115	0.24517354462487	7.97736416170017	119.938920207817	127.067435170378	96.9187018684342	57.3307172156702	55.4069846380687	439.079697572115	491.088259496004	335.123572706822	272.950555548862	206.079721442441	91.3325518200736	348.864361353249
"ENSRNOG00000005299"	"Kif5a"	"ENSRNOT00000007721.5"	1.64097721735633e-09	7.63362570806347e-08	1.80897372463546	0.300002409175823	9.34710036167909	25.9522582753355	27.8028942077966	26.3829374785624	61.6145074231091	63.2058214404505	142.159276262477	156.447558390667	139.679365987661	369.267137568554	309.128123873425	40.9916837650508	223.336292416557
"ENSRNOG00000023972"	"Col4a2"	"ENSRNOT00000057461.4"	1.76314894415622e-09	8.18274534574796e-08	-1.14466012389487	0.190198230144936	5.89095424988389	7.32709083435108	7.16460865375076	7.8115674678223	4.1800122597505	5.66081540323949	2.56763763122071	1.71195807920106	2.43676449937627	1.44630965716372	1.14271017728931	6.42881892378283	1.86107600885021
"ENSRNOG00000057817"	"LOC100911769"	"ENSRNOT00000083476.1"	1.83173621712648e-09	8.4811954707466e-08	1.01180402451274	0.168295559457113	7.80297871832128	24.0672784283974	27.8529307417544	26.1230449864107	34.0859288817561	29.2067225980667	51.6033005702536	74.0837708875803	65.1693936097987	103.429642735321	59.4304270801963	28.2671811272771	70.74330697663
"ENSRNOG00000018090"	"Ppp6r1"	"ENSRNOT00000024400.5"	1.84522712695695e-09	8.52374498249555e-08	1.00656444584619	0.167457177430544	7.47336831297511	10.242965569011	10.2480712798628	12.3934019162361	14.3827702689988	12.7414673834113	31.8320001433766	32.1574927179668	22.0956816440203	35.1912934857535	25.8641463401077	12.001735283504	29.428122866245
"ENSRNOG00000000501"	"Zfp523"	"ENSRNOT00000000595.6"	1.91949854906925e-09	8.84620994114078e-08	1.14578015529606	0.190820981256983	5.7394642725773	2.92509788299534	3.18645288946523	2.81956094323387	4.4012117177445	4.81045679330194	6.96404259809458	10.4784771690087	7.08517784127879	13.2492440211084	14.0466149813194	3.62855604534818	10.364711322162
"ENSRNOG00000020134"	"Upf1"	"ENSRNOT00000092446.1"	1.93954402508866e-09	8.91785242347612e-08	-4.73592471413051	0.788953811283611	1.67481517650531	1.46748026204766	1.94513380743329	0.302515104414905	0.65573285876359	0.39558164911966	0	0	0	0	0	0.953288736355821	0
"ENSRNOG00000015953"	"Oaz2"	"ENSRNOT00000021372.6"	1.95880310320414e-09	8.98555580930473e-08	0.98925009490644	0.164842406118559	6.66176307850319	53.5500867063405	54.5277920948741	56.8030374179892	65.9581160251599	70.4604419217182	122.699796796824	115.227329302746	130.932396872811	215.099094189554	133.940850173204	60.2598948332164	143.579893467028
"ENSRNOG00000004461"	"NEWGENE_6497122"	"ENSRNOT00000005899.7"	1.9849096237402e-09	9.0842849916073e-08	1.46784475217888	0.244680057548247	4.56085424042206	5.10499714290256	6.31100964311203	4.47456464233366	3.98646345614767	5.6001923557768	20.5830895860641	21.6143263596352	19.6191685197655	20.2520755874101	14.6232274795608	5.09544544805454	19.3383775064871
"ENSRNOG00000057996"	"Phactr3"	"ENSRNOT00000081235.1"	2.02708618000051e-09	9.2559370573894e-08	0.991271891251557	0.165332632264794	7.03314522402271	18.155642986439	15.1085745061953	24.2360530191977	16.4464767555028	17.2830774635202	38.1385384764743	29.3690600757737	55.8711323052676	49.4098934634687	48.1345432748697	18.245964946171	44.1846335191708
"ENSRNOG00000039587"	"Wdr13"	"ENSRNOT00000007464.7"	2.03477426077046e-09	9.26968310935361e-08	0.986991364941786	0.164635581471847	6.98690893135928	21.1011114264718	23.8039524880458	22.2458138953583	22.2717432403368	28.6777115858243	49.7891966748021	56.9677126931226	57.8936785335607	68.7209652716929	48.2670742868692	23.6200665272074	56.3277254920095
"ENSRNOG00000008392"	"Sbf1"	"ENSRNOT00000072955.3"	2.14286991719897e-09	9.73973696081009e-08	1.01049041952651	0.168792341167955	7.87091909739968	10.96913787926	10.872838441634	12.1473475348616	12.6763470271285	15.3896967883675	22.8908965452676	27.5371033399535	29.1082674933193	39.7161945690215	34.2660658557821	12.4110735342503	30.7037055606688
"ENSRNOG00000033202"	"Fbxo41"	"ENSRNOT00000084049.1"	2.18590374956837e-09	9.91259830782525e-08	1.05235288245743	0.17588012774647	5.97869127638314	3.869941078628	4.54185027704269	4.63944222362033	4.38198244884595	5.04812917264068	9.28795426787523	10.2797886542625	8.87953418965425	15.7424932644927	14.6232100584694	4.49626904015553	11.7625960869508
"ENSRNOG00000020782"	"Pspc1"	"ENSRNOT00000075879.1"	2.19423116615011e-09	9.92764361178006e-08	-4.10930234941402	0.686860294169473	1.36150399414706	2.1477997892738	3.0749137007723	2.31276757707802	2.25994791804357	2.93235853521952	0	0	0	0	0	2.54555750407744	0
"ENSRNOG00000015051"	"Golga7b"	"ENSRNOT00000020390.7"	2.20112170873789e-09	9.93613414625485e-08	1.05170916001114	0.175805733064867	6.97849855926136	7.51655226874442	6.88141715307939	8.36271417936157	11.3794511511625	12.3539950628463	18.6643626455605	17.2994914658036	21.5536547481835	34.1209860012428	27.6494836167241	9.29882596303884	23.8575956955029
"ENSRNOG00000017945"	"Serf1"	"ENSRNOT00000076577.1"	2.32811705406461e-09	1.04855217409996e-07	1.2849168731271	0.215117875105802	4.95432356259366	11.3253673276799	15.6813853463726	9.18179994757418	15.3828713433874	15.7180373250381	41.625410247538	53.3184976542961	39.1119100590159	46.2960125296204	28.4270267640935	13.4578922580104	41.7557714509128
"ENSRNOG00000015845"	"Fam129b"	"ENSRNOT00000021689.5"	2.38289358523321e-09	1.06836656512594e-07	1.97719108343862	0.331227220720745	6.5427527516584	5.65394392038437	4.97553055160934	4.37214868202687	2.12670409041025	1.83340289744023	33.2577572306357	40.5661196009962	21.8479779536393	17.6183109569538	10.2736412658988	3.79234602837421	24.7127614016248
"ENSRNOG00000060974"	"AABR07065448.1"	"ENSRNOT00000084305.1"	2.381463018205e-09	1.06836656512594e-07	-4.06116594830664	0.68033213381185	1.33743579359338	0.261209151155342	0.314528509038038	0.20215089594951	0.373028535824269	0.337541263896625	0	0	0	0	0	0.297691671172757	0
"ENSRNOG00000048433"	"Tshz2"	"ENSRNOT00000073788.1"	2.40029369133213e-09	1.07373860228282e-07	1.98464436580587	0.332541967224416	5.17890720545896	1.45245429977281	2.03300144627603	1.29685319954092	0.699693941876798	0.49900003155014	11.4123473754156	9.30787262494857	8.0713916733302	5.56693387927277	3.31732945572478	1.19620058380334	7.53517500173839
"ENSRNOG00000062118"	"LOC102547949"	"ENSRNOT00000092843.1"	2.44565522534546e-09	1.09156643244754e-07	-2.15865809201488	0.361884583300743	4.62210104862756	3.94665523733063	4.33861463083268	6.39131559642317	9.49091433884574	9.39581763990616	0.342321078157724	0.274613065502642	0.876539921713483	0.861160586146667	1.45054729564825	6.71266348866768	0.761036389433753
"ENSRNOG00000009636"	"Scrn1"	"ENSRNOT00000013088.5"	2.47200922052403e-09	1.1008495892837e-07	1.04984903319597	0.176051823967442	8.33114646598499	25.6337966903467	32.4577080836338	20.6790968935757	23.3113919294098	18.2278279788493	61.2270860299359	87.0002069679679	47.710257555016	64.4228256131558	47.9186388835067	24.0619643151631	61.6558030099165
"ENSRNOG00000047386"	"Smg1"	"ENSRNOT00000092467.1"	2.51360991895889e-09	1.11686564493292e-07	-1.00272319190248	0.168226083116393	7.22400700369215	8.29997444269415	7.69076059450425	8.78003390926212	9.44764244198379	10.2984902335191	2.75757575673021	3.4151648398572	2.17972852781409	2.77680121790683	3.59675677900812	8.90338032439268	2.94520542426329
"ENSRNOG00000006336"	"Fyco1"	"ENSRNOT00000008630.6"	2.53099159669516e-09	1.12207294120152e-07	1.47708714287207	0.247856577990369	4.63139977454587	0.412988571204063	0.386077830699954	0.368197917088438	0.206543684876595	0.195190895272682	1.12088584852891	1.40851888663625	0.597188010309185	1.47528832734111	1.61667911791744	0.313799779828346	1.24371203814658
"ENSRNOG00000009297"	"Chchd1"	"ENSRNOT00000012372.4"	2.57082708982832e-09	1.13718929551625e-07	1.13179986504197	0.189998440690121	5.45149023198737	17.4761007857282	15.6965013920076	17.0156344405177	15.8265754575332	20.5853662566324	60.7947080017706	44.7901173063919	47.8201819757914	53.5724350938034	30.8340445976799	17.3200356664838	47.5622973950874
"ENSRNOG00000018985"	"Grk2"	"ENSRNOT00000025847.7"	2.66682996188407e-09	1.17702827070505e-07	1.24927837988523	0.209931236944213	7.55970915452036	17.5259099108337	16.5976984512886	18.7796184974241	26.0204101252672	31.6711161404536	48.2851014726052	44.7752710997413	64.0184798095033	99.0272255095264	94.4731009573092	22.1189506250534	70.1158357697371
"ENSRNOG00000009643"	"Msl1"	"ENSRNOT00000012812.7"	2.87207602617746e-09	1.26479845801686e-07	0.982986647826581	0.165520865790384	7.53857446612893	20.7155384054137	21.1965245426923	21.1854429679423	19.6712351056125	21.4160043242152	37.3991609279304	43.208363497723	53.3904873329701	60.6586457242344	57.0257646771552	20.8369490691752	50.3364844320026
"ENSRNOG00000000875"	"Fhl1"	"ENSRNOT00000087274.1"	2.88614910850242e-09	1.26817775794218e-07	-4.51285675236579	0.760002985138623	1.56328119562295	1.20154976743262	1.40561568814673	0.780453392941944	0.976525423979735	0.87232104389421	0	0	0	0	0	1.04729306327905	0
"ENSRNOG00000001991"	"Atp5po"	"ENSRNOT00000002732.6"	3.09920226274196e-09	1.35878077966278e-07	0.972531398829986	0.164105546208994	7.27657263566125	66.9981398744378	68.3291291479915	66.5380228081858	63.8166520297491	64.3900593913962	161.373861456063	182.881173592243	195.064027456607	150.554112401179	98.0813822452631	66.0144006503521	157.590911430271
"ENSRNOG00000005933"	"Yap1"	"ENSRNOT00000087278.1"	3.12644392610009e-09	1.36769843892992e-07	2.0627491266948	0.348154035874573	5.41351437639021	3.83575132291315	5.44868212103139	4.17152472314323	1.89910940568805	1.37459940903356	31.430571936692	41.146584568547	17.5463590960921	13.4380947653955	12.6901846906088	3.34593339636188	23.2503590114671
"ENSRNOG00000020994"	"Slc25a39"	"ENSRNOT00000028496.4"	3.16742688131776e-09	1.38257485698401e-07	0.970549754305866	0.163870115239534	7.14334833346441	26.1047185620248	25.4127277252547	22.3535127547791	35.6408557922902	38.6331003222508	56.930631390353	56.4353212316234	56.4168341886623	106.028332640199	74.5253864084316	29.6289830313199	70.0673011718539
"ENSRNOG00000047931"	"Tmsb4x"	"ENSRNOT00000071708.2"	3.22104987827284e-09	1.4028911085216e-07	1.50895170416348	0.254894083010557	10.3527715506269	2071.41435916369	1998.39542048246	1814.64800102803	1483.94170762591	1378.33552435367	7504.96580912126	5943.19629917093	7182.34886223563	9103.22805552784	4941.56786963476	1749.34700253075	6935.06137913808
"ENSRNOG00000023226"	"S100a10"	"ENSRNOT00000035240.4"	3.23723778141424e-09	1.4068495858396e-07	1.08321443738954	0.183003479338315	7.18886640769348	120.073539340771	105.75335550728	98.0714531592374	104.149519237667	60.5861380491662	254.591300235117	202.915243705727	187.141234385675	415.880890912513	216.672640127084	97.7268010588243	255.440261873223
"ENSRNOG00000029652"	"AABR07052744.1"	"ENSRNOT00000046112.1"	3.44254428687656e-09	1.49279869000072e-07	-2.29196616627883	0.387879166838522	5.25124820161018	42.4175222012586	40.316849230609	49.1451997492996	88.0035190718392	94.3133291089242	3.31409871797953	2.84017550969091	2.47432847303562	10.0825802664579	15.1935899033109	62.8392838723861	6.78095457409497
"ENSRNOG00000014742"	"Ankrd13b"	"ENSRNOT00000056110.3"	3.48413095413395e-09	1.50753325585311e-07	1.52568994842068	0.258285476847726	6.51649296060398	6.6514611209616	6.11321999889483	6.77297383454831	12.4992352318772	14.3158478786315	21.9012899737009	29.071552046171	33.0482935774525	39.3467296498024	68.0194369711648	9.27054761298269	38.2774604436583
"ENSRNOG00000015033"	"Mxd4"	"ENSRNOT00000077060.2"	3.58669201097125e-09	1.54852887976944e-07	0.970376197597135	0.164409022143119	6.80452667690321	7.90439681321198	8.5305053945556	7.11649819960866	6.67456963627341	5.30570416402845	20.0506705082461	18.5303184236928	17.0566799016708	16.7673557493637	11.5203449932142	7.10633484153562	16.7850739152375
"ENSRNOG00000019908"	"Lamtor2"	"ENSRNOT00000026974.6"	3.85453192162353e-09	1.66054911066986e-07	1.13340134476721	0.192417683836739	5.42691041375306	18.5107143261001	14.4343657536455	16.4409835373813	14.9632791500933	15.9080414577806	53.9822763958254	45.434109154872	45.749369024601	43.9717317379467	30.4996971824818	16.0514768450002	43.9274366991454
"ENSRNOG00000060869"	"Irak1"	"ENSRNOT00000092207.1"	4.02871273161819e-09	1.73182213020559e-07	1.1516761953878	0.195763082362352	7.21330519940515	10.8793609156098	10.1295872094051	8.88882935958438	16.1776659999647	16.2761198983721	28.7758906394505	24.5696524663791	29.9853289980616	56.1284388893191	38.5015523165123	12.4703126765872	35.5921726619445
"ENSRNOG00000033280"	"Pam"	"ENSRNOT00000041418.3"	4.13028958983864e-09	1.77164391345957e-07	-4.11039499539933	0.699178862811493	1.9041332227717	1.78961716110982	0.34223329880048	3.10743951420703	0.792856297212436	2.14401651505617	0	0	0	0	0.154270490016225	1.63523255727719	0.030854098003245
"ENSRNOG00000011518"	"Dusp26"	"ENSRNOT00000015725.7"	4.40076124987907e-09	1.88358284425169e-07	1.05509881221199	0.179793908116851	5.77879211896673	5.9700687874065	6.46501141143485	6.32260911351567	5.09672812948024	7.66733770547841	14.1710621179607	11.971761296313	18.834101023284	18.4846470443286	17.480495594734	6.30435102946313	16.1884134153241
"ENSRNOG00000021151"	"Ppp1r14b"	"ENSRNOT00000051749.2"	4.65173940762962e-09	1.98671378967664e-07	1.25833109468844	0.214762525563303	5.3152973097569	10.4626247062335	9.05219962534514	8.18705840637697	11.8085987964437	8.8005142178545	32.2117484450846	45.0549786536531	24.8133232918613	42.0746278941274	15.004082033434	9.66219915045076	31.8317520636321
"ENSRNOG00000059834"	"Cib2"	"ENSRNOT00000078571.1"	5.02107410437738e-09	2.13984140917089e-07	1.0353457851778	0.177088977467609	5.8588909048846	8.29331564784293	8.20444454395333	6.11849586680417	9.55135272410813	8.177111298385	16.9607540458831	21.0111954791745	16.0377499027934	32.3529539693165	17.1314791893317	8.06894401621871	20.6988265172998
"ENSRNOG00000019575"	"Rell2"	"ENSRNOT00000026526.5"	5.18159122183446e-09	2.20351058461574e-07	1.09710231629555	0.187820335183208	6.94504565291578	14.9024122086329	12.3184191305289	19.7530998519987	18.7155512725106	28.4695286801182	37.7406326649364	36.5924723857563	45.4491683092857	60.1542890766499	68.1574445781105	18.8318022287579	49.6188014029478
"ENSRNOG00000024186"	"Eef1b2"	"ENSRNOT00000034740.4"	5.56722614021009e-09	2.36243512677823e-07	1.56829906001043	0.269038934100497	6.37953605365942	17.7155334678245	22.0763031184538	17.4943588318755	9.94036459317714	12.0284506787583	88.9601798504588	119.973731081973	67.714311514951	40.7429635359518	38.1292938856064	15.8510021380178	71.1040959737882
"ENSRNOG00000051706"	"Tep1"	"ENSRNOT00000088981.1"	5.59269002883998e-09	2.36477091544734e-07	4.59331607271645	0.788078230018404	1.60351111973658	3.88932988411951e-09	0	0	0	0	0.376310072078627	0.304606130180709	0.189286175581645	0.173209150419156	0.293288123682901	7.77865976823902e-10	0.267339930388608
"ENSRNOG00000056716"	"Zbtb20"	"ENSRNOT00000093596.1"	5.59659665612758e-09	2.36477091544734e-07	1.02010814265371	0.175024118325444	6.16890511970658	5.54275833188565	6.13620717008221	4.1721554228052	4.45384548334161	3.90235757905845	9.02377118750087	17.7637881492711	7.96044327489245	12.0852978113958	14.7489924511549	4.84146479743462	12.316458574843
"ENSRNOG00000055952"	"RF00612"	"ENSRNOT00000086224.1"	5.70251524832082e-09	2.40439882289306e-07	-3.86638066568128	0.66372717895883	1.2400431522807	30.69973669541	30.4702319900274	19.8960449507852	57.1435910798259	44.7705317983621	0	0	0	0	0	36.5960273028821	0
"ENSRNOG00000029244"	"Pcdhb10"	"ENSRNOT00000040125.3"	5.93100397349995e-09	2.49542899666345e-07	-1.31308164307108	0.225666133947694	4.93686191093946	2.46919996952115	2.75842544192811	3.04399521048381	2.81669127287136	3.3206194572962	0.590322333430447	0.797866392054076	0.450428438766659	0.588327610197867	1.19777498719754	2.88178627042013	0.724943952329318
"ENSRNOG00000052163"	"AABR07008180.1"	"ENSRNOT00000063358.3"	5.96794613082328e-09	2.50565229818909e-07	-3.87808028707595	0.666605583768897	1.24589296297803	67.4870897085985	31.4752671312025	111.583031706774	45.5073503361342	34.565936000531	0	0	0	0	0	58.123734976648	0
"ENSRNOG00000004826"	"Sos2"	"ENSRNOT00000089891.1"	6.25097633889488e-09	2.61893442088541e-07	1.40191003409575	0.241296712801344	4.79877024259847	0.803962337406947	0.860165441837753	0.597839480172846	0.724195389947628	0.898953209079528	3.71114425398448	3.33290867516979	2.78367393622242	1.70460721774268	2.94044312664996	0.77702317168894	2.89455544195387
"ENSRNOG00000007284"	"Slc2a1"	"ENSRNOT00000064452.2"	6.30889877817294e-09	2.63762546597159e-07	-1.31715425959518	0.226768830463182	4.887187679418	5.36236951854834	6.95291226151935	5.00839165241603	3.64334956053027	4.5313424738991	1.11457981653068	1.43828858460625	1.43541474289623	0.956012322310238	1.04848527483682	5.09967309338262	1.19855614823604
"ENSRNOG00000018007"	"Gtf2h5"	"ENSRNOT00000024211.5"	6.92914863819174e-09	2.89084081185359e-07	0.991350447768727	0.171139873347137	6.10514689018249	8.92130595509905	8.05092640987755	7.84406009589055	9.0561652231201	9.65300420247027	20.0265764379051	17.8650811423207	23.042472457601	23.2865418822974	20.1594599807386	8.7050923772915	20.8760263801726
"ENSRNOG00000007404"	"Svbp"	"ENSRNOT00000066169.4"	7.21514369687046e-09	3.00383408909416e-07	1.38878643684005	0.240032001675451	4.616411463278	5.62284200933456	4.86594476158329	5.20323429068721	5.03421830523775	4.41117113519458	21.6282760350057	24.0691651389742	16.445966242858	19.201504517025	10.4783190784582	5.02748210040748	18.3646462024642
"ENSRNOG00000042696"	"Minos1"	"ENSRNOT00000064418.2"	7.35114725312642e-09	3.04765031621771e-07	1.05455009053263	0.182362953242336	5.68213213994215	24.148246925281	26.0561256056003	24.1877822084253	28.4091914174805	28.02791152423	62.1346207894838	52.48934543308	65.4537177943107	91.3676148842654	57.9876006258166	26.1658515362034	65.8865799053913
"ENSRNOG00000018774"	"Rps14"	"ENSRNOT00000059501.2"	7.34023509341134e-09	3.04765031621771e-07	1.78424811962594	0.308536032430388	7.93576174516878	301.268968780326	330.571864020951	266.029881990173	115.583636604244	120.329115245984	1287.85416924847	1668.47611890101	1013.86959718598	824.167619394674	704.121301115617	226.756693328336	1099.69776116915
"ENSRNOG00000053964"	"SNORD113"	"ENSRNOT00000088785.1"	7.75314461623939e-09	3.2076005607519e-07	-3.74084197787824	0.647906304569193	3.33593595198995	275.236095368463	273.437309739719	503.561316215057	159.288616473027	93.0986629592678	7.32649836484046	16.4572215238871	12.7942432471109	0	2.23448778685868	260.924400151107	7.76249018453943
"ENSRNOG00000014581"	"Trappc2l"	"ENSRNOT00000019740.5"	7.98039287526371e-09	3.2947384501896e-07	1.06680859853034	0.184924993035215	5.59642999844002	21.2483033173207	18.8116621816827	15.9834061094185	15.477912372206	21.4197046153144	53.4537407098453	42.855114056459	57.9488924605745	49.8757175316008	33.2437123664924	18.5881977191885	47.4754354249944
"ENSRNOG00000009063"	"Dnajc15"	"ENSRNOT00000012530.5"	8.10180897695046e-09	3.33791161114818e-07	0.993924577201978	0.17236703433189	6.07439715166591	20.7958199363268	18.6683460709442	23.1127865025009	23.8252666352148	19.3056448637187	53.2397293623685	48.1080175195619	57.7284304737513	61.7671572557735	34.0363716080941	21.1415728017411	50.9759412439099
"ENSRNOG00000058248"	"AABR07064111.1"	"ENSRNOT00000077897.2"	8.34089735355068e-09	3.4292855364173e-07	2.15996969534852	0.374902285674948	3.6876716699989	0.750835881015465	3.19500416282006	2.02238701980447	1.36521740461782	2.26626256972383	9.80311367553163	16.8408585844261	14.9591462897743	13.0564594221708	13.4107588310628	1.91994140759633	13.6140673605931
"ENSRNOG00000042740"	"Mrpl42"	"ENSRNOT00000066322.1"	8.42160916184772e-09	3.45530080249143e-07	1.0423733352721	0.180974029930725	5.72178107035894	16.8942667201479	19.9400344627064	15.9081609400754	20.0715828683286	16.3657889588253	53.5791858841867	45.2304493741836	43.1430893524818	45.9014672003025	34.4868073455432	17.8359667900167	44.4681998313396
"ENSRNOG00000047225"	"Tma7"	"ENSRNOT00000075819.2"	8.7522591168812e-09	3.58354377932303e-07	1.3350195831402	0.232044505195274	6.76259533114702	74.1398178958604	75.1834646155561	83.1805005915398	39.9087865486465	50.7062843052555	268.486899511122	201.914482408957	283.635901833557	185.921599501678	125.568587496173	64.6237707913717	213.105494150297
"ENSRNOG00000009723"	"Ptpmt1"	"ENSRNOT00000013584.5"	8.95459673546082e-09	3.65882976302324e-07	1.14964461234549	0.199958090962749	5.24160440171188	4.01408319763169	2.75759830558638	4.34341308597181	2.71242605051252	3.65393941561198	9.64816132700356	9.6741157262468	13.1260495894939	9.50294440469384	7.16806450030628	3.49629201106288	9.82386710954888
"ENSRNOG00000058789"	"RF00100"	"ENSRNOT00000088518.1"	8.9802780089691e-09	3.66177303094117e-07	-3.7979110457145	0.660627643682266	1.2058083422973	10.3900156384929	13.8269237172108	14.1332121733131	16.3984127030647	14.7571647470515	0	0	0	0	0	13.9011457958266	0
"ENSRNOG00000009997"	"Erap1"	"ENSRNOT00000080222.1"	9.03418870755676e-09	3.67619132685118e-07	-4.02188414468607	0.699709839903883	2.28438583297571	0.560795441539986	1.01374584363112	0.679735628016091	0.825148875680443	0.528531832521597	0	0.0855021012680162	0	0	0.0220931511073312	0.721591524277847	0.0215190504750695
"ENSRNOG00000015417"	"Kansl3"	"ENSRNOT00000020955.5"	9.1151537815872e-09	3.70153693626462e-07	0.966587245392163	0.168206792083461	6.56425505232389	5.86565562201516	4.11108120826742	4.86462949233586	4.27673816590712	5.01361736367021	10.1257887847638	10.4788169469795	12.7195560727756	11.1803204888344	11.8137691598254	4.82634437043915	11.2636502906357
"ENSRNOG00000060706"	"SNORD113"	"ENSRNOT00000078847.1"	9.18775973951768e-09	3.72339130384503e-07	-4.01667736151536	0.699150827984799	1.57490872350366	65.1344517779792	56.7251885187713	52.9942002107904	28.2447293402737	18.4012110911654	0	0	0	0	1.5569232628312	44.299956187796	0.31138465256624
"ENSRNOG00000026942"	"RGD1311595"	"ENSRNOT00000039428.6"	9.68986410590298e-09	3.91584299139354e-07	0.94106305548801	0.164060595458239	6.95079305166491	3.56904017649725	3.8093567301458	4.17995402757986	4.7671516940762	5.41831896915546	8.69424554759312	9.78217209686134	9.9754011674252	10.5121894877854	10.3044893551251	4.34876431949091	9.85369953095803
"ENSRNOG00000004708"	"Aard"	"ENSRNOT00000006257.3"	9.70216939382465e-09	3.91584299139354e-07	2.71788806792053	0.473841844216192	5.35031203467095	5.60927993249429	3.4821706226174	3.17919484015464	1.36104734401878	0.891871005271496	59.9456571191319	54.4732430254643	45.261426157715	22.6617329094286	10.2795880189235	2.90471274891132	38.5243294461327
"ENSRNOG00000050843"	"Mut"	"ENSRNOT00000075279.2"	1.01963055560239e-08	4.10691437405947e-07	0.965481528488026	0.168571489673423	6.29877041631177	4.58234072562394	5.08826658526338	4.39190473473551	3.22381531812893	2.57209868113338	7.80096716739105	9.54496878904975	10.5300280328571	9.91784147553788	7.70112499913577	3.97168520897703	9.09898609279431
"ENSRNOG00000012985"	"Pfdn5"	"ENSRNOT00000017794.5"	1.03567712317822e-08	4.16308591278353e-07	1.29920467035621	0.226944024814247	5.99493521282724	23.6892483431413	27.7314927144854	25.1810822684703	19.0392459163156	15.6599932282637	96.0488830361325	93.1601722702151	87.9273162574818	53.882527893423	39.1718630546568	22.2602124941353	74.0381525023818
"ENSRNOG00000059579"	"Gpt2"	"ENSRNOT00000078348.1"	1.0518250856219e-08	4.2109126710645e-07	-2.36022924123626	0.412472234634176	3.89323779271453	2.45470458286256	3.25631927168357	3.11180512271202	3.70908034338244	4.93349764180788	0.0882163952490601	0.647996938273197	0.255728332751184	0.156912846566414	0.671025278637224	3.49308139248969	0.363975958295416
"ENSRNOG00000010389"	"Ndrg2"	"ENSRNOT00000040540.2"	1.050872246308e-08	4.2109126710645e-07	2.15990306437228	0.377453199199094	7.85499661029932	33.6545694043872	44.7527855251046	24.4597152158613	22.9145360501636	7.19905417876791	235.038764794771	293.289375205897	147.854201851049	190.264721543511	85.2119528759683	26.5961320748569	190.331803254239
"ENSRNOG00000004155"	"Samd14"	"ENSRNOT00000005519.7"	1.05701790947418e-08	4.22317014355844e-07	1.44260814451736	0.252146188575965	6.65837399192562	13.1867561715465	12.2190395991265	12.7610607656486	24.9159491907062	25.5103530420516	42.8455903046513	51.3602340371191	47.6729446378254	122.082886140081	75.5182618887009	17.7186317538159	67.8959834016756
"ENSRNOG00000032735"	"Srek1"	"ENSRNOT00000040533.3"	1.06671898089526e-08	4.25335413368237e-07	-1.10714266636672	0.193564384883921	5.42068908864188	11.0014927760746	10.8690970603008	13.1967681254433	6.62408701251948	7.61937109276753	3.91891825833755	3.24114933020333	3.03519031183741	1.69816893523597	2.62286694360578	9.86216321342114	2.90325875584401
"ENSRNOG00000059605"	"Ddn"	"ENSRNOT00000089060.1"	1.07641662778649e-08	4.28340327567164e-07	1.89115614659957	0.330724251614195	8.65492973553028	21.7421386280642	20.2579995907871	31.6992733035173	28.9431349389848	66.6354316704033	106.004425590833	106.75721252423	184.881685729912	229.839382619487	401.662868180971	33.8555956263513	205.829114929087
"ENSRNOG00000051010"	"AABR07013918.1"	"ENSRNOT00000073367.1"	1.08270899781824e-08	4.29980845887056e-07	-3.77418816299846	0.660142133522933	1.19394690093928	36.6328481817126	16.7935380744797	39.1493308740886	21.1164837690268	18.7980811145581	0	0	0	0	0	26.4980564027732	0
"ENSRNOG00000023274"	"Lrrc28"	"ENSRNOT00000033858.5"	1.09571845228177e-08	4.34277051377358e-07	1.1558417555968	0.202239771607279	5.91609432538556	3.02179864142915	3.36104461675883	2.90016746111429	4.3100170113909	4.2886407892211	6.24835146154776	7.97217619316871	8.69961976481713	16.4075888196688	13.9514695938332	3.57633370398285	10.6558411666071
"ENSRNOG00000016961"	"Rps27"	"ENSRNOT00000022897.4"	1.11853247016655e-08	4.40675108574366e-07	1.93858729339179	0.339406367290005	7.52053704445751	307.253447947986	339.302420992784	267.635000877251	133.705855153127	138.761161784778	1707.05165585802	2109.44572245406	1344.31671398994	976.150738052072	709.60785609798	237.331577351185	1369.31453729041
"ENSRNOG00000025936"	"Rpl6"	"ENSRNOT00000034951.5"	1.11735490825709e-08	4.40675108574366e-07	1.15625287439352	0.202429509387083	7.36044477401533	69.5098310547573	77.7313260229025	62.7574593667628	45.2855411922102	44.760881937569	203.513519145214	253.386747770783	175.400327792513	117.219925646034	111.443910505944	60.0090079148404	172.192886172098
"ENSRNOG00000019908"	"Lamtor2"	"ENSRNOT00000093121.1"	1.11820086285365e-08	4.40675108574366e-07	-3.77059829539207	0.660147608924021	1.19215196713609	1.22114786186007	1.5168325693544	1.69929911045323	2.63657410079012	2.57229842154901	0	0	0	0	0	1.92923041280137	0
"ENSRNOG00000010588"	"Tns2"	"ENSRNOT00000074212.1"	1.12087808111084e-08	4.40723034392333e-07	1.31891634278332	0.230929266451554	4.72232671303836	0.62230571547124	0.633289862314003	0.479124492013369	0.797264218187431	0.881573169326328	1.80180497665986	2.21837661570756	1.57882548929811	2.96423209497784	3.01049298164741	0.682711491462474	2.31474643165816
"ENSRNOG00000004206"	"Glrx5"	"ENSRNOT00000005781.5"	1.13612654027871e-08	4.4583405244957e-07	0.945647062292582	0.165640183476838	6.59341540912064	9.81426741857327	10.9735964745561	8.77781901509006	11.4281551180048	13.6850885489541	22.3639831095639	21.820130972709	20.1182692555283	36.969871694099	25.6317955516326	10.9357853150357	25.3808101167066
"ENSRNOG00000022619"	"Fth1"	"ENSRNOT00000030919.5"	1.16075677025551e-08	4.53575631797995e-07	2.06589296809579	0.362094837451979	9.05705617352118	353.507235745441	354.605724224682	385.401815903246	113.45893490763	103.370024972975	1864.57834704524	2454.60069651927	1966.4705430285	1101.888051043	918.687336605357	262.068747150795	1661.24499484827
"ENSRNOG00000008048"	"Plscr1"	"ENSRNOT00000087190.1"	1.1595864952075e-08	4.53575631797995e-07	-3.75959244097293	0.658934438227418	1.18664903992652	0.709565045489153	0.743232357912281	0.89851510870191	1.08275962165479	1.37918000156088	0	0	0	0	0	0.962650427063803	0
"ENSRNOG00000017466"	"Kif5b"	"ENSRNOT00000023861.6"	1.16272100193461e-08	4.53575631797995e-07	1.70975850163802	0.299689280523698	7.83693170838103	25.1194231686539	21.9740526963457	22.8506221732306	9.44334983944577	8.57138425898182	104.925530975602	111.649026674021	104.962938129848	46.5665405151128	51.6346111878388	17.5917664273316	83.9477294964845
"ENSRNOG00000016244"	"Mical2"	"ENSRNOT00000021858.2"	1.22551248457779e-08	4.76451383551873e-07	-3.85647994278334	0.67703407506919	1.23509279083172	0.628818833427441	0.787114639612031	0.269957503673468	0.293363703278933	0.257154722733701	0	0	0	0	0	0.447281880545115	0
"ENSRNOG00000061984"	"AABR07060481.1"	"ENSRNOT00000092488.1"	1.22617048802268e-08	4.76451383551873e-07	-3.95027237225478	0.693511190112418	1.28198900556744	2.3054877041202	0.612061219714586	1.34820083493457	1.23507986108265	1.86374315121269	0	0	0	0	0	1.47291455421294	0
"ENSRNOG00000031506"	"Ftl1"	"ENSRNOT00000044711.4"	1.2406579499447e-08	4.81137350177184e-07	2.13848138853327	0.375564669492754	8.97846318425369	126.210814534867	127.726617454047	110.87419033376	259.341453531036	384.657655902165	772.163881617705	982.467575813368	727.889324502544	2703.47497239057	2788.7310737458	201.762146351175	1594.945365614
"ENSRNOG00000019382"	"Zbtb47"	"ENSRNOT00000043346.4"	1.24494705007555e-08	4.81857728346624e-07	0.945245336820737	0.166023177205884	6.50340947601696	9.08511099185212	8.50473079150647	10.4701871623831	9.03379761493239	11.7188635361799	16.2585064555331	25.392530256664	17.1069453586227	26.1603288228216	29.1318635015769	9.7625380193708	22.8100348790437
"ENSRNOG00000061165"	"AABR07013073.4"	"ENSRNOT00000082067.1"	1.24812260664015e-08	4.82145140268769e-07	-3.74874243113852	0.658480539641381	1.18122403500932	8.37621550536941	10.0448861169318	11.0519103435254	4.69012745426223	8.15251340195514	0	0	0	0	0	8.4631305644088	0
"ENSRNOG00000008471"	"Kif21b"	"ENSRNOT00000011324.7"	1.29747494042098e-08	5.00234647749468e-07	0.957253586758407	0.168340966666306	6.83362375856657	3.99641529282637	5.27752297265486	4.80599790955551	6.65608321199466	5.32066812350531	9.61725720036917	14.952295514	10.4404732060511	12.0704377476078	13.4172128273305	5.21133750210734	12.0995352990717
"ENSRNOG00000057817"	"LOC100911769"	"ENSRNOT00000089719.1"	1.31029620672874e-08	5.04196891820261e-07	0.939362871289999	0.165243565769774	7.39430583409266	7.04037480372653	8.77894474302265	7.76958041337678	10.373982415547	8.39693581771839	16.087786120076	19.409698247463	18.8750680328344	26.2824698256307	16.717695240953	8.47196363867827	19.4745434933914
"ENSRNOG00000011949"	"Ndufb5"	"ENSRNOT00000016051.5"	1.3928439084025e-08	5.32856906038848e-07	0.934376936403269	0.164669210373342	6.75053527719911	25.4379717040658	27.3131513088861	30.913482448958	30.6128994156551	29.837877283145	82.157556941333	71.909444133077	78.1282043241397	61.9703397611499	39.4856801600854	28.823076432142	66.730245063957
"ENSRNOG00000010466"	"Chpf2"	"ENSRNOT00000014082.5"	1.38939251749906e-08	5.32856906038848e-07	-1.07346496162625	0.18916712281819	5.55437436218348	6.66077031635477	7.04501970320581	6.05373827691097	4.39056786514717	5.05480536180811	1.69921625614604	2.42081224532583	1.64331448196174	0.983476244623605	2.45393225864393	5.84098030468537	1.84015029734023
"ENSRNOG00000015658"	"Sorbs1"	"ENSRNOT00000021226.5"	1.39112973451031e-08	5.32856906038848e-07	1.33996130779447	0.236138290549654	6.45767993352194	9.21121091890975	12.5234893120207	7.47059482920641	6.4246079118308	5.09436090950012	36.9939512236489	43.8930551494775	21.6488273827342	21.9354214705077	16.5709335818398	8.14485277629356	28.2084377616416
"ENSRNOG00000017863"	"Zeb1"	"ENSRNOT00000024336.7"	1.43676752267007e-08	5.48601579898898e-07	1.56373957245378	0.275842978968996	6.00813080769995	3.87615527086016	4.48185082345169	3.18420377006739	1.73408845893379	1.80338828920877	17.8795611026194	20.5836236505421	10.3780174923386	8.2847080781604	7.69784644868651	3.01593732250436	12.9647513544694
"ENSRNOG00000054274"	"Cacnb3"	"ENSRNOT00000081206.1"	1.44315335013094e-08	5.49980191145095e-07	1.21635358556054	0.214593010301837	7.2643499433698	12.4654821424386	13.964576424905	11.3981855879715	23.5969891563936	19.2054744950305	33.7051047687942	38.1316385331473	36.8774233951295	77.636142745331	59.7092042083728	16.1261415613478	49.211902730155
"ENSRNOG00000002154"	"Mepe"	"ENSRNOT00000002927.6"	1.46787683487451e-08	5.58328507422422e-07	-4.14386484205986	0.731449714505226	1.37879794652523	1.01042415513553	0.392272516490553	1.68880613962516	0.69804113281656	1.98524048692313	0	1.51259184610513e-08	2.54077601930459e-07	2.36179998394999e-07	3.91106893109996e-07	1.15495688619819	1.79298082379301e-07
"ENSRNOG00000016047"	"Macf1"	"ENSRNOT00000084109.1"	1.48732778798632e-08	5.6464319491427e-07	-1.00115814671	0.176788770458617	7.88818212155697	10.862175497639	9.90287619891175	10.3917218044191	6.88730300745961	6.67179537910948	3.65488669923708	4.18721731957908	2.15884080904923	2.66042811729905	2.22113881652813	8.94317437750779	2.97650235233851
"ENSRNOG00000055850"	"LOC100910750"	"ENSRNOT00000086889.1"	1.49224415825584e-08	5.65426433731472e-07	-3.62836060844512	0.640775424725327	2.90294410430613	0.881346957344669	0.956063890519599	0.923612859207817	1.97829369500569	1.56757158340067	0.048412131163664	0	0.0279917735917214	0.056530168430339	0.0304216799078679	1.26137779709569	0.0326711506187185
"ENSRNOG00000046005"	"Scd2"	"ENSRNOT00000075397.1"	1.57027696563046e-08	5.93858370761428e-07	1.65475289975137	0.292684808077195	10.8977827515772	245.315189993212	267.009054039818	215.030422826042	242.274943200294	173.539028533364	1065.2806376782	1241.33709997716	856.718066739872	1371.15979034282	841.639572022252	228.633727718546	1075.22703335206
"ENSRNOG00000014163"	"Zfp536"	"ENSRNOT00000018956.5"	1.57465138815329e-08	5.9437841064826e-07	0.950282545233101	0.168095658368221	6.31646480482676	4.43750895886359	3.11806872709491	4.66801856438327	3.18422634137118	4.2745366647313	7.80079411972096	7.9835142974634	10.1816027399526	9.22822307038365	9.81996442212352	3.93647185128885	9.00281972992883
"ENSRNOG00000019476"	"Agap1"	"ENSRNOT00000065720.1"	1.67114134258294e-08	6.29600912280723e-07	0.930406452755294	0.164878035848934	6.87650314084094	6.58464543194862	6.07225673463262	6.83203032131985	5.46336921605424	9.95783842058239	10.8681730644149	13.0319334694106	18.2290314502423	16.6241989014654	20.4504150362729	6.98202802490754	15.8407503843612
"ENSRNOG00000009198"	"Rab6b"	"ENSRNOT00000081952.1"	1.69786873028272e-08	6.3845663430764e-07	0.953590288387383	0.169068294420488	6.30270828150602	19.8126540523067	23.6587958790618	24.5473381003884	20.6972603984507	23.5664874043779	46.3397484280146	50.9031149968291	56.5428978988143	65.2190983784985	40.3813134887587	22.4565071669171	51.877234638183
"ENSRNOG00000021705"	"LOC102556092"	"ENSRNOT00000001338.3"	1.71118587412775e-08	6.42245652795259e-07	1.53195043680774	0.271674371770871	5.1218564592917	7.70782467104668	8.9814632677829	7.62612733091077	3.73772569697747	4.3131162816852	31.9576407500256	46.7860536134852	21.9813804728179	19.1703081379033	15.3230278425985	6.4732514496806	27.0436821633661
"ENSRNOG00000062001"	"AABR07014301.3"	"ENSRNOT00000092673.1"	1.75543778101621e-08	6.57608894260836e-07	-3.69257701021577	0.655348672451105	2.48446438763815	3.22278018229907	3.40081479242755	3.7100897858679	2.94686844242608	4.19345935760123	0.0569246730454481	0	0	0.180777637806971	0.406895293449413	3.49480251212437	0.128919520860366
"ENSRNOG00000007104"	"Itpr1"	"ENSRNOT00000041130.5"	1.82935954749642e-08	6.82719739222912e-07	-4.86358516375416	0.864267129982553	2.57683885110374	0.872773224316674	0.654416678415451	0.489507865331544	0.485747302545611	1.5010648622142	0	0.145513522845762	0	0	0	0.800701986564696	0.0291027045691524
"ENSRNOG00000019365"	"Ablim3"	"ENSRNOT00000026227.6"	1.82727348544814e-08	6.82719739222912e-07	1.38748945323427	0.246550545761316	6.45427425632907	6.79142320349785	5.22970059392181	7.64530073071283	8.79362757219621	13.275498865117	16.8809930156414	23.9274293603846	23.0914111862644	40.8325856285932	47.768975689207	8.34711019308914	30.5002789760181
"ENSRNOG00000025791"	"Dync1li2"	"ENSRNOT00000076353.1"	1.84603091967863e-08	6.87646517580289e-07	-4.13364587299234	0.734760126990166	1.37367575593622	3.66324367365132	2.14825283143512	1.55394589104984	2.39117991615662	2.33319459978907	0	0	0	0	0	2.41796338241639	0
"ENSRNOG00000052637"	"Samd1"	"ENSRNOT00000081243.1"	1.85475808169812e-08	6.89601142683147e-07	1.21214532521655	0.215491355474815	5.68127594996311	5.20799298411335	5.59822180651893	4.51498642507743	7.39971558696374	7.81150551521438	11.3097407097463	14.5977776591327	14.0639251156235	31.2432874562036	24.8391970452559	6.10648446357757	19.2107855971924
"ENSRNOG00000011417"	"Pde3b"	"ENSRNOT00000015498.4"	1.99625056443618e-08	7.40818304034305e-07	1.00973897409537	0.179914530659903	5.76514884896655	2.23444476187648	2.31615751299299	2.08036082118364	2.06110254228449	1.9581587941562	4.91647154192819	4.67448326167054	5.11779392619266	7.08731538291981	4.60475870771448	2.13004488649876	5.28016456408514
"ENSRNOG00000057724"	"AC118957.2"	"ENSRNOT00000087560.1"	2.06512445929779e-08	7.6494525999821e-07	2.20183004480063	0.39273123253229	3.6198542235358	3.81254225676316	6.39166906822422	2.93849735975129	10.253745566805	6.01114265612652	38.2275768127992	47.0421181977556	19.090266800141	69.206119409256	49.5666478387551	5.88151938153404	44.6265458117414
"ENSRNOG00000016930"	"Ube2s"	"ENSRNOT00000022977.5"	2.12461144908985e-08	7.85511662063684e-07	0.924646798829198	0.165070235282506	6.71208168914161	23.6875218245972	25.3516031761575	29.9474108032679	45.5182431362957	41.6565946853797	63.8116365852307	67.1926834398519	57.6468467499721	109.216012688731	68.6403594782315	33.2322747251396	73.3015077884034
"ENSRNOG00000011501"	"Atp1b3"	"ENSRNOT00000015476.5"	2.16671496399422e-08	7.99586414180139e-07	0.9266076025126	0.165520802903929	6.56513481452547	15.1305753865585	13.4098155415856	14.3397426584184	10.2336837734695	11.453521400223	34.2071065974897	31.3605439583214	34.7941814605348	24.8467795265293	20.9266398897582	12.913467752051	29.2270502865267
"ENSRNOG00000062170"	"AABR07058158.1"	"ENSRNOT00000093273.1"	2.2001401779968e-08	8.10412228761388e-07	-3.79347456317145	0.677953549852883	1.20359010102578	1.62253283115232	1.77511897436293	3.35653590263989	3.7791586718646	3.20428990670612	0	0	0	0	0	2.74752725734517	0
"ENSRNOG00000010489"	"Samd4a"	"ENSRNOT00000092091.1"	2.22735885746484e-08	8.18915964348438e-07	1.26581496136507	0.22630732204134	5.21211666365232	2.28650466661234	2.37642505755591	3.14727972983343	2.75227564865468	3.37962454528779	6.36313502680692	12.2889124344916	4.74314742014259	15.6396093690645	8.63701209476227	2.78842192958883	9.53436326905357
"ENSRNOG00000012759"	"Col19a1"	"ENSRNOT00000017169.7"	2.234408441509e-08	8.19986520099701e-07	-1.55439060510388	0.277927248786513	5.04645125302208	6.73851509509951	4.62943720182462	8.58372200545549	2.64477044143514	4.0241192981477	1.22024111726405	0.770742438064855	1.6558572726706	0.711063300347301	0.589773338970808	5.32411280839249	0.989535493463523
"ENSRNOG00000027617"	"Ttc26"	"ENSRNOT00000078066.1"	2.27338210572603e-08	8.32747009042011e-07	4.39904547427019	0.786978001306219	2.15839016534126	0	0	0.395950179414755	0	0	3.27418723421726	2.05054858168003	4.2234362729076	2.00911065604819	0.854964623282358	0.079190035882951	2.48244947362709
"ENSRNOG00000017500"	"Mtss1l"	"ENSRNOT00000023645.5"	2.30629066832386e-08	8.43242844541954e-07	1.45306260919803	0.260065324955126	7.68605102573535	11.0642752702453	10.4141810691602	11.7650408384241	18.9413101648329	29.9044544110856	43.4124318219707	67.2628943672583	35.0276342309556	73.8588081938828	81.5889897089075	16.4178523507496	60.230151664595
"ENSRNOG00000047006"	"Mir2985"	"ENSRNOT00000074092.1"	2.36207291597225e-08	8.62047863274808e-07	-3.66200708720519	0.655903959937872	1.13785636304265	45.9335127458284	35.9194334065238	29.291499750663	43.0930765684491	52.8460468146077	0	0	0	0	0	41.4167138572144	0
"ENSRNOG00000019476"	"Agap1"	"ENSRNOT00000088192.1"	2.40743349032137e-08	8.76987306575343e-07	1.18488368535439	0.21235092940409	7.46053062604295	13.3425935185762	12.1758756865256	15.3170848320552	13.6704726716548	26.6596889699417	32.5637702737963	33.2168770822268	41.4255728472938	59.8820937624357	70.8185427215458	16.2331431357507	47.5813713374597
"ENSRNOG00000007027"	"Hgf"	"ENSRNOT00000009763.5"	2.43534723844825e-08	8.85528004116126e-07	-2.44967128530052	0.439179828066214	4.86506107123077	2.03045288189344	1.98931537270351	2.21412799957764	8.55296595645634	7.25292108913475	0.151565464125381	0.202586747185919	0.161784306018604	0.63961144122578	0.440267801171389	4.40795665995314	0.319163151945415
"ENSRNOG00000046527"	"Phf20l1"	"ENSRNOT00000007564.7"	2.48055032293615e-08	9.00312559516955e-07	-1.01955720163143	0.182892319647429	5.72080772018704	12.3445482287856	13.1014692238775	13.11432383678	12.5487700652532	8.07619615627641	4.04381025017062	4.17657586205059	4.00564777096713	3.32157345854449	3.21571305320867	11.8370615021945	3.7526640789883
"ENSRNOG00000062076"	"AABR07061237.1"	"ENSRNOT00000093101.1"	2.50210494410332e-08	9.06475569968839e-07	-3.85196075461866	0.691167170791286	1.69090734657167	1.20457523887927	0.698024236218501	0.763286140215709	1.01962996732709	0.858206032521824	0	0	0	0.0940935381875588	0	0.908744323032479	0.0188187076375118
"ENSRNOG00000060902"	"SNORD113"	"ENSRNOT00000087710.1"	2.60098109062062e-08	9.40577413737752e-07	-4.09807183668563	0.736219578862014	1.79958624959357	106.375872469099	43.3848343430883	59.3487503913103	32.509219551502	41.1680150837818	3.97364287203358	0	0	0.000241787928189304	0	56.5573383677563	0.794776931992354
"ENSRNOG00000011841"	"Map2"	"ENSRNOT00000043627.7"	2.63704550019991e-08	9.51882161702397e-07	1.51777432196631	0.272786191616024	8.45452827557107	21.0514806486957	24.8102505421071	33.3451203071113	9.9953200611444	12.1763748805521	55.9933657227588	127.307535369048	82.7433413770928	78.4422555698089	51.104402637003	20.2757092879221	79.1181801351423
"ENSRNOG00000010921"	"Taf1d"	"ENSRNOT00000014605.6"	2.73479745668639e-08	9.84453263648857e-07	-1.02840551059088	0.185044267381223	5.90063241573878	21.0735153836087	24.9136419559688	24.6251642134782	33.1911100817081	31.4536221975869	9.23080773039858	4.55767270115601	11.4703741555562	8.3618624815755	10.5278958295303	27.0514107664701	8.82972257964332
"ENSRNOG00000020748"	"Map4"	"ENSRNOT00000056161.4"	2.73721425175617e-08	9.84453263648857e-07	0.923199608028467	0.166118845411953	6.70499517059721	2.99287945759453	3.27423215009938	3.54707756087463	3.20307642771479	5.44070907866925	7.65540486107308	10.4983638398764	6.94626867507987	7.06160038076658	8.79945352998239	3.69159493499052	8.19221825735567
"ENSRNOG00000000007"	"Gad1"	"ENSRNOT00000084375.1"	2.75648165707056e-08	9.87797414071741e-07	-3.75436075563799	0.675701717366936	1.18403319725905	2.0723547757485	1.50523923975189	0.459788683883154	1.77815290306485	1.47894786565183	0	0	0	0	0	1.45889669362004	0
"ENSRNOG00000019692"	"Metrn"	"ENSRNOT00000026676.4"	2.75385876251026e-08	9.87797414071741e-07	1.46614774359745	0.263866200084635	6.0753300030699	15.0919296904536	23.4286881539682	12.705625456485	11.3490667313455	8.24423427171067	67.0396005864428	91.3939023057013	37.0849137597681	48.9405131567633	30.9238843098982	14.1639088607926	55.0765628237147
"ENSRNOG00000032070"	"Dync2h1"	"ENSRNOT00000044174.5"	2.88916724196975e-08	1.03347702588654e-06	-0.923191710880476	0.166400102299239	6.56281367728354	4.40892166089642	3.67554797603163	4.31206691379222	4.02451118368054	4.11667527756889	1.2990282158	1.19899308180981	1.28965369213105	1.62740311218373	1.97931904339973	4.10754460239394	1.47887942906486
"ENSRNOG00000032890"	"LOC100912321"	"ENSRNOT00000043510.2"	2.90179873192479e-08	1.03612514361358e-06	-3.900637510076	0.703164625727398	1.53239680043619	0.614564060482713	1.11708048443245	1.28125130849602	5.34193064750496	6.19700330864988	0	0	0	0.0808695868877282	0	2.9103659619132	0.0161739173775456
"ENSRNOG00000003873"	"Cpd"	"ENSRNOT00000005262.5"	2.98507759489204e-08	1.06394393341682e-06	-0.951403815076922	0.171661972807129	6.53523427273351	11.9422930368133	11.3847247636682	13.328343132928	7.56228214056613	10.8849981977089	3.51543449144086	3.22524866629202	3.42593682151209	3.79395187967176	4.87871100097811	11.0205282543369	3.76785657197897
"ENSRNOG00000024497"	"U2af1l4"	"ENSRNOT00000038154.4"	3.10435756094157e-08	1.10447134264236e-06	1.0065203377933	0.181831811204371	5.69953043182098	6.42323188922057	6.5635505613231	8.72819564780512	10.004960868141	10.9671744789593	17.8426230096447	19.1672034264054	18.4165122719106	29.715834901836	18.0661409965776	8.53742268908982	20.6416629212749
"ENSRNOG00000013326"	"Hmbox1"	"ENSRNOT00000038336.6"	3.14837571399123e-08	1.11812475849757e-06	1.02859764678822	0.185903052860739	5.5694849227052	7.81769947541247	7.32259705886384	6.73064564879143	6.42418348438041	5.06507076283747	12.5195695351637	19.1393625635374	17.1010901968454	15.6125315555339	18.4315146034701	6.67203928605712	16.5608136909101
"ENSRNOG00000025584"	"Agap2"	"ENSRNOT00000031230.6"	3.15864299319236e-08	1.11976436844531e-06	1.58285287721111	0.286105599036808	8.72139194459468	18.154165959761	19.680646770776	24.3515889889054	40.3875340216323	44.8942189947789	68.0222333812884	94.3651504663359	101.425425927441	219.672893259803	170.039330523751	29.4936309471707	130.705006711724
"ENSRNOG00000050044"	"Ptp4a2"	"ENSRNOT00000074415.2"	3.25947791423228e-08	1.15344774689895e-06	0.936347990213487	0.169416639941939	7.92263984304407	84.5337899226905	75.4364104215747	99.2925278165251	77.7329566208928	104.813329517586	169.998042720499	139.842295514658	193.317301612757	260.211602138876	251.122406986406	88.3618028598538	202.898329794639
"ENSRNOG00000011653"	"Washc2c"	"ENSRNOT00000092689.1"	3.33678200688869e-08	1.17869891319988e-06	-3.96986226461707	0.718815986205439	1.86696683139438	1.69283435764504	1.61431080472721	1.86970400254646	2.71933665113624	2.80304901157193	0	0	0	0.0653859711309851	0.0627780034238909	2.13984696552538	0.0256327949109752
"ENSRNOG00000020782"	"Pspc1"	"ENSRNOT00000076766.1"	3.36644347631834e-08	1.18706068274378e-06	-3.61386459352424	0.654540357711938	1.11378511620218	1.56581302321292	1.37436857553982	1.81925925375266	2.44919884438702	2.94922003460986	0	0	0	0	0	2.03157194630046	0
"ENSRNOG00000014354"	"Cep95"	"ENSRNOT00000066525.2"	3.40678134312027e-08	1.19915072604999e-06	-1.18068119575241	0.213925158125677	5.04274149916614	4.55888270293291	4.84163561439394	4.24796759219668	5.92415149877008	4.14223838945137	0.843976819636666	1.80842925410305	1.61321585147053	1.2378549562468	1.1272821885897	4.742975159549	1.32615181400935
"ENSRNOG00000056393"	"AABR07051555.1"	"ENSRNOT00000080510.1"	3.41587326973179e-08	1.20021915933111e-06	-3.60262927178284	0.652808273306521	1.10816745533147	0.911023339205638	1.0411964561031	1.02871774484183	1.65597004473596	0.82239150269271	0	0	0	0	0	1.09185981751585	0
"ENSRNOG00000039871"	"RGD1306063"	"ENSRNOT00000084687.1"	3.58333135561016e-08	1.25682968980755e-06	1.15591686054302	0.209775919469464	5.1333597013112	6.94580564921711	10.5685158497784	8.89456560884214	8.16692563681801	9.52022536977796	31.7261907053774	20.3944441978099	18.4551181071937	38.6229725354772	18.5565385679526	8.81920762288673	25.5510528227622
"ENSRNOG00000010284"	"St3gal5"	"ENSRNOT00000050249.2"	3.64500246888817e-08	1.27395086289165e-06	0.958007723131763	0.173954190639071	6.44185387586213	7.23461288711815	7.33711573462316	6.8084965601811	8.11768894145613	6.62235799391262	12.5896443682478	15.4155085517135	22.0096046222642	15.8930675571663	19.2757553176878	7.22405442345823	17.0367160834159
"ENSRNOG00000035617"	"Mir186"	"ENSRNOT00000053740.1"	3.63909739788232e-08	1.27395086289165e-06	-3.93241922794974	0.714008169676937	1.94019966393145	55.5656086804142	56.2114228255424	31.2857835095483	71.7173736802495	69.9653115046894	0	1.69331917394534	0	3.44510604124296	0	56.9491000400888	1.02768504303766
"ENSRNOG00000002152"	"Dcun1d4"	"ENSRNOT00000081087.1"	3.72363162810949e-08	1.29914098546207e-06	2.20423545864515	0.400516540647923	4.16318374102711	1.46727360688332	3.20763880640306	1.41846762039948	0.653614505195767	0.419648855354322	12.564415900693	12.1741364773206	13.4638468358842	6.00204507646019	5.57118646105924	1.43332867884719	9.95512615028345
"ENSRNOG00000015105"	"Bspry"	"ENSRNOT00000020366.5"	3.75268923219323e-08	1.30697790007686e-06	1.24703635964536	0.226646860811446	5.59241256023757	3.39106739114881	2.55243160314576	3.90559326917219	3.06669293321203	4.07861264039148	8.34986653425237	5.09509515822348	13.7125280815642	14.4959738329554	14.3296622750344	3.39887956741405	11.196625176406
"ENSRNOG00000055765"	"Rasl10b"	"ENSRNOT00000088205.1"	3.81733949011696e-08	1.327161696064e-06	2.24510026057087	0.408266831950623	7.17629576036179	5.02304221541672	5.81212666484205	7.21032474644132	12.1522370830481	17.5726609347404	30.1122975022581	45.2287892390959	57.8955635649405	145.092806884135	165.055437879499	9.55407832889772	88.6769790139857
"ENSRNOG00000014589"	"Arpin"	"ENSRNOT00000078857.1"	3.85399810060279e-08	1.33756007635106e-06	1.4218588170573	0.258641364258873	5.43438383646573	1.7952433041135	1.83467456615281	1.55174005661835	1.48464900601966	0.804913540015181	6.4856461204189	7.97234962689049	5.08504894447769	6.76258528781713	2.39962056736147	1.4942440945839	5.74105010939314
"ENSRNOG00000048342"	"Tbca"	"ENSRNOT00000073688.2"	3.87304164230775e-08	1.34181933960861e-06	1.24627209839776	0.226737356794026	5.95018602288458	31.636312778622	37.2936860935976	31.157282245267	17.3678782554505	17.2456006471824	83.015728430027	91.0395210587131	91.5347529681798	84.4814741601824	47.4726716424385	26.9401520040239	79.5088296519082
"ENSRNOG00000011076"	"Ank2"	"ENSRNOT00000074002.1"	3.93995472938663e-08	1.36261924733429e-06	-4.06919047552617	0.740725221571312	2.16183074651373	2.41325454139428	3.52384322125906	6.16624523694719	2.02532814475172	1.9750789678761	0	0.166795630983737	0	0.105424838386604	0	3.22075002244567	0.0544440938740682
"ENSRNOG00000036686"	"Anapc11"	"ENSRNOT00000054954.4"	3.9558137907306e-08	1.36572059043394e-06	0.915034497860534	0.166587590314576	6.46713661393557	6.31272698607766	5.30704239796473	4.30340753671004	7.35238608747497	8.01540880399658	12.941957587428	12.8732241744386	12.1784223816862	20.2268189472679	11.2903539886603	6.2581943624448	13.9021554158962
"ENSRNOG00000002667"	"Lamc2"	"ENSRNOT00000036947.5"	4.17335538814916e-08	1.43831971699047e-06	-3.62649843620874	0.66136494295988	1.12010203754442	0.255103057932264	0.152782937817883	0.236224465853948	0.166231507256877	0.0951103285555715	0	0	0	0	0	0.181090459483309	0
"ENSRNOG00000020374"	"Tmem8a"	"ENSRNOT00000027609.5"	4.55230668510684e-08	1.5661989857424e-06	1.42707005453061	0.260987395768107	4.52356913108768	0.699160440865967	0.682650004055723	0.976415526493657	0.444202517850858	0.502307375521362	1.98145244866844	2.1670497474743	3.24651561418666	3.17283441458	1.72824649585823	0.660947172957513	2.45921974415353
"ENSRNOG00000039091"	"Pnpla8"	"ENSRNOT00000047296.6"	4.66414854397368e-08	1.60189656318763e-06	0.904557255902378	0.165558829297395	7.46264834674294	13.4443310419743	14.6370540149684	13.2419902878485	11.2544577517663	8.91112607971451	21.9588840721115	27.037897479904	30.1659251612557	34.7003035295513	21.8066059458104	12.2977918352544	27.1339232377266
"ENSRNOG00000015425"	"Ssx2ip"	"ENSRNOT00000093080.1"	4.74409618334178e-08	1.62653553746166e-06	-3.57896106454232	0.655410029665969	1.09633335171122	1.9055043882681	1.48291641107183	2.65816598624694	1.06724787695555	2.26373527319077	0	0	0	0	0	1.87551398714664	0
"ENSRNOG00000011000"	"Rims1"	"ENSRNOT00000015453.6"	4.75808469173198e-08	1.62851406452595e-06	1.78330503305603	0.32660536710899	6.36878512942013	2.36962362858226	2.13211925922382	3.22799592416314	1.56260999147257	1.35126200256458	7.19109302812636	9.74939556473869	4.94804489712477	18.0146166667913	23.3677060088193	2.12872216120127	12.6541712331201
"ENSRNOG00000054904"	"AABR07037698.1"	"ENSRNOT00000080867.1"	4.7941644456966e-08	1.63803373828223e-06	-3.84750142085257	0.704828035533808	1.51179781063179	0.723541499133504	0.429459383326594	0.513051825498687	1.13462920125927	0.886832108978798	0	0	0	0.0305386209013186	0	0.737502803639371	0.00610772418026372
"ENSRNOG00000018553"	"Pitpnm1"	"ENSRNOT00000025084.4"	4.82846955943108e-08	1.64691534009029e-06	1.07302543262105	0.196614323445461	7.90916445109112	15.5331624450697	14.8081465754109	16.1097352278422	19.3920300404269	31.0986947181475	34.0180996630202	38.7414570642277	46.5712160930544	63.7052416452518	68.7363730637801	19.3883538013794	50.3544775058668
"ENSRNOG00000011697"	"Zfp827"	"ENSRNOT00000015929.8"	4.89982487264701e-08	1.66838195019323e-06	1.46639950587727	0.26882204910364	6.16418844590021	2.83826523090904	2.58984827401598	2.77293011939189	4.97249642170899	5.36481690241644	9.29844662297627	11.9278715771459	8.43081176796624	25.5141651214024	19.6630380835981	3.70767138968847	14.9668666346178
"ENSRNOG00000013656"	"Lpar1"	"ENSRNOT00000044348.2"	4.94272569454644e-08	1.6801028317123e-06	2.20012079623827	0.403443265953269	4.04800308058216	0.571108325673523	0.352233720943243	0.398886770112756	0.197867622290491	0.102247721757127	3.94259925997072	3.90947117596275	2.30523461176429	2.10326252543575	0.840698377125504	0.324468832155428	2.6202531900518
"ENSRNOG00000019740"	"Hdgfl3"	"ENSRNOT00000076414.1"	5.04410822606374e-08	1.71162829992988e-06	-3.82765461528987	0.70235435163631	1.8401426814392	1.90842584513619	2.16075840263534	2.45781887993042	0.933271971736025	0.563456810076697	0	0	0.305302990777212	0	0	1.60474638190293	0.0610605981554424
"ENSRNOG00000016991"	"Arl2bp"	"ENSRNOT00000023455.5"	5.18109593658468e-08	1.75249089673506e-06	0.910758314548813	0.167265659816201	7.7318798588511	34.9553818922459	31.4755743261464	28.8567360609753	47.549321759029	47.4618196740091	71.7372060601718	65.0447314448757	71.0036977999689	131.571348628537	86.4824180821527	38.0597667424811	85.1678804031412
"ENSRNOG00000020339"	"Neurl1"	"ENSRNOT00000076452.2"	5.18221560017532e-08	1.75249089673506e-06	2.55183553334061	0.468661622478598	7.11320201147127	2.24557140518253	2.25539771668773	2.66854614789801	8.7992840714789	9.15363504848426	22.7246575414882	28.3627963898526	31.2134993452246	106.392348407711	100.162496916077	5.02448687794629	57.7711597200707
"ENSRNOG00000006554"	"Fam149b1"	"ENSRNOT00000079812.1"	5.2425311843185e-08	1.76986781055604e-06	1.0327574534182	0.189744589638044	5.61311032210681	3.90533719085597	3.03694170484687	3.51715875059349	5.02036536461428	5.75623813914785	9.0182625613671	8.63045467688184	9.95024920170666	14.9047158528127	10.2099519507283	4.24720823001169	10.5427268486993
"ENSRNOG00000052324"	"RF00019"	"ENSRNOT00000083772.1"	5.26318136813302e-08	1.77381743490293e-06	-3.49601348520864	0.642391853630393	3.56602220101092	189.935186052748	118.633317027003	201.568038203555	522.465818123506	511.588828134662	1.50941251906554	2.0184980266437	5.96149376735568	22.0535394837662	22.2415136707682	308.838237508295	10.7568914935199
"ENSRNOG00000014289"	"Arpc2"	"ENSRNOT00000092060.1"	5.28919666865888e-08	1.77955875013265e-06	-2.60346224220388	0.478462928097267	3.48070876698975	9.96140141016861	8.75025653975244	8.26612794607735	12.238600416629	15.2507596909081	0.671141788119605	1.09733389093557	0.169685254688752	0.715481011280181	1.20502545405751	10.8934292007071	0.771733479816324
"ENSRNOG00000016617"	"Wwtr1"	"ENSRNOT00000022507.5"	5.38867717027186e-08	1.80689366299962e-06	1.79500789961068	0.330087005647556	5.93123838754691	7.03731621225552	8.94044129625087	5.56339167764199	3.54659716953669	2.27104839904896	36.2844854960745	51.2755827401829	19.5147454776994	23.2507340770002	14.7328698916846	5.47175895094681	29.0116835365283
"ENSRNOG00000015084"	"Necab2"	"ENSRNOT00000020341.7"	5.37970832248945e-08	1.80689366299962e-06	0.91118760414459	0.1675506662599	6.64961398064324	11.578852373704	12.2280412400852	17.2063522736549	20.0114333931593	25.3751017531131	33.1805130605303	30.5049237650082	41.9841486922991	45.1211709924833	33.7989782002933	17.2799562067433	36.9179469421228
"ENSRNOG00000019987"	"Scand1"	"ENSRNOT00000027076.3"	5.43189884523734e-08	1.81830978743359e-06	1.1600935890958	0.213387425817067	5.98154161252246	11.6476879316691	11.7737322781169	17.8645846653048	23.7608067607993	33.1402080990289	43.923947924054	44.3005759669147	42.9351928015187	70.4943399871788	56.6205228370449	19.6374039469838	51.6549159033422
"ENSRNOG00000043095"	"Etv3"	"ENSRNOT00000093312.1"	5.5351963688828e-08	1.84976368367876e-06	-3.80456792222153	0.700244266058668	1.48690575056587	0.623186138334341	0.578502312482272	0.45778499684629	0.724820922864791	0.829197113658992	0	0	0	0.0283920984652128	0	0.642698296837337	0.00567841969304256
"ENSRNOG00000002919"	"Gfap"	"ENSRNOT00000034401.5"	5.67553663091447e-08	1.89346985546855e-06	2.39681915928456	0.441506139907725	10.1378450553465	255.616603860654	256.131021500361	175.322702858983	97.0504426851998	45.2265202928242	2354.04959769292	2303.46407987342	1372.10778536981	1295.98081405968	467.160871884636	165.869458239604	1558.55262977609
"ENSRNOG00000060825"	"Ccm2"	"ENSRNOT00000090360.1"	5.78891637074866e-08	1.9280496759517e-06	1.01286336361165	0.186695986201424	5.76430946209952	4.17928078633096	4.75130978706102	5.28303577721228	7.37627369805564	7.23999841411498	11.2225689594494	10.7951556688402	11.7919367358981	19.183093253027	17.9856242152136	5.76597969255498	14.1956757664857
"ENSRNOG00000024924"	"Cep19"	"ENSRNOT00000037795.3"	5.87225701924097e-08	1.95252545889762e-06	1.07077783189578	0.197464013700963	6.15186629898682	11.9599228926891	11.7158531662345	11.5544856679363	6.46247679771465	7.21701996676989	33.2560715962498	31.5576054525296	27.2286377818357	19.2244380358646	16.0288486854623	9.78195169826889	25.4591203103884
"ENSRNOG00000001215"	"RGD1309594"	"ENSRNOT00000049745.4"	5.94696274726754e-08	1.97405294409717e-06	1.00193894062353	0.184846330759829	5.5980733972178	5.52143714961576	4.64582390586394	4.71240470272481	4.21033980739282	4.82493649437165	9.90594192945958	11.2402291507415	12.3245120021548	14.1903996261428	10.5187348261314	4.7829884119938	11.635963506926
"ENSRNOG00000049452"	"Nebl"	"ENSRNOT00000068553.3"	6.01729724723271e-08	1.99405985866908e-06	-3.60772220667307	0.665841917987969	1.11071392277659	0.250560800199244	0.44332180098706	0.342420326817697	0.30298595305499	0.159621114116064	0	0	0	0	0	0.299781999035011	0
"ENSRNOG00000019333"	"Hipk1"	"ENSRNOT00000056079.4"	6.14628070140708e-08	2.03340308280107e-06	0.912319021517934	0.168495761155346	7.8485752144298	9.36763628207944	9.399264243124	9.48381733527743	10.2849316170804	9.786213500803	21.775432311383	26.3559455891152	16.4487125530393	27.8897356833257	17.2972089600672	9.66437259567285	21.9534070193861
"ENSRNOG00000017952"	"Sept2"	"ENSRNOT00000024261.4"	6.18022975223868e-08	2.04122688333523e-06	1.41440354932545	0.261273078683456	8.03676384200611	34.5242231334671	34.302258717929	25.2316756740998	16.8928028373384	14.5984062313114	124.364739779215	136.893979013915	90.600193257193	65.4827737204372	48.1721106351411	25.1098733188291	93.1027592811803
"ENSRNOG00000016952"	"Uqcr11"	"ENSRNOT00000022747.5"	6.51154555516845e-08	2.14707651026245e-06	1.91561606056115	0.354471120038741	7.00517994851863	40.5826965450029	42.3496815080538	38.2810242265619	129.630347050311	118.291415132086	272.039840136946	232.99586982344	281.245146798003	996.64493291561	392.056752784812	73.8270328924031	434.996508491762
"ENSRNOG00000009730"	"Cyp7b1"	"ENSRNOT00000082084.1"	6.53769867278916e-08	2.15211917937978e-06	-4.26639508339821	0.789571042355918	1.44005036113916	2.51701098353588	1.56951898931902	1.73293308860515	0.7193470204659	0.204483448776543	0	0	0	0	0	1.3486587061405	0
"ENSRNOG00000003186"	"Anks3"	"ENSRNOT00000004298.6"	6.55685866236488e-08	2.15484690069793e-06	1.06203245237748	0.196566770991	5.53811985050704	2.74133523324525	3.24105752220517	2.17690312581152	4.15964849471275	3.90232031933141	5.2073431608608	7.38324595476237	7.05678723316572	12.5410279630626	10.5004168956798	3.24425293906122	8.53776424150626
"ENSRNOG00000016705"	"Prpf4b"	"ENSRNOT00000022902.7"	6.74877803190489e-08	2.21424725593144e-06	-1.00515131002101	0.186217269787821	5.7600480242438	6.28352702153297	6.19829282857095	7.22533867935587	5.4512204732132	4.47766795974029	2.43066333922174	1.49869717725118	2.5394569567487	1.64373495844258	1.65349150947815	5.92720939248266	1.95320878822847
"ENSRNOG00000061194"	"AABR07003751.1"	"ENSRNOT00000086316.1"	6.79951388941198e-08	2.22720606192524e-06	1.66899318332364	0.30927958195322	4.08840170336272	5.53873524713718	5.08132612355854	5.64882235140509	4.20789034377012	3.00002477792828	24.2753932807491	25.5445094378163	28.4767496798889	11.0871118059517	21.3823223197332	4.69535976875984	22.1532173048278
"ENSRNOG00000014744"	"Pacs2"	"ENSRNOT00000056880.5"	6.97886444993691e-08	2.28218080535313e-06	1.09158632644289	0.20245626068605	7.44253212411296	10.6591541273627	12.0816178313797	11.1746240004303	16.9924835735416	20.5280231717434	25.4849118449209	31.1534452328906	30.8608500894518	58.2952863031706	46.2922284838133	14.2871805408915	38.4173443908494
"ENSRNOG00000060278"	"Cpg1"	"ENSRNOT00000078938.1"	7.25391403229699e-08	2.36821769980279e-06	-1.33249727019249	0.247456878074613	4.61235983598736	2.52689845204292	1.9629845464003	2.57835232590919	2.23779530097197	2.04974250098215	0.434300657233281	0.242625709638422	0.519056062784525	0.852122368627878	0.866745574065257	2.27115462526131	0.582970074469873
"ENSRNOG00000019106"	"Rps17"	"ENSRNOT00000025888.7"	7.42521412499525e-08	2.42015572886564e-06	1.89834987631036	0.352816039987537	6.81578736651012	103.418638426137	139.010789460017	99.677666745251	51.5850712217208	40.9174212331737	640.951804453705	749.291557837686	451.195847853738	339.197062933741	238.358473019937	86.9219174172599	483.798949219761
"ENSRNOG00000060407"	"Cacna1i"	"ENSRNOT00000092608.1"	7.62998683998233e-08	2.48281525792988e-06	1.20894384194081	0.224891894254022	5.40120027194617	1.23765306261588	0.491640988744772	0.681873230639874	0.794144741327792	1.22081704183973	1.76150749163041	2.91788419914748	1.89192398862014	2.66526917620087	3.75679272182612	0.88522581303361	2.598675515485
"ENSRNOG00000019459"	"Oaz1"	"ENSRNOT00000026341.5"	7.77327374848014e-08	2.52529452251854e-06	0.891272144831063	0.165900987874331	7.59008041716291	115.734516659444	106.722825262267	119.998775715935	125.317442711619	143.688474446079	248.660671099271	237.848509499015	239.599707048611	353.495659769283	234.157963339034	122.292406959069	262.752502151043
"ENSRNOG00000036760"	"Tmc5"	"ENSRNOT00000055103.4"	7.8384660004679e-08	2.54230574028269e-06	2.56452784878322	0.477493866937751	5.01827178569523	0.985237957903976	0.804176897320836	1.32826086843134	0.343944340119236	0.407049954557417	6.54461440129967	10.5678811938407	33.1430246744998	3.45924597701232	4.09584465210212	0.773734003666561	11.5621221797509
"ENSRNOG00000050020"	"AABR07065532.2"	"ENSRNOT00000073290.1"	8.05244954299352e-08	2.60744105544939e-06	-3.46983692202803	0.646639883040068	1.04177128045407	68.0510312839617	46.0655900443261	56.8722620693688	6.63584233928466	24.8396890321917	0	0	0	0	0	40.4928829538266	0
"ENSRNOG00000006554"	"Fam149b1"	"ENSRNOT00000065858.2"	8.22445523691491e-08	2.65879330228292e-06	1.0533194515503	0.196436619820959	5.44895380866102	3.28994704577647	4.28772925229472	2.5446276248359	3.25938350685306	3.39625609386522	7.25036448563743	8.07560851575529	6.20959501861607	13.4871096660103	8.80634807553848	3.35558870472507	8.76580515231151
"ENSRNOG00000009318"	"Ttll5"	"ENSRNOT00000012895.7"	8.30445639340733e-08	2.68028358873213e-06	0.899912881408354	0.167882121000625	6.34203358562952	3.58125268029986	4.30253326275243	4.15215806423606	4.41459929133764	5.77821548789544	8.69257594233725	9.04100443265953	8.82703140699968	11.6000161907385	10.2909100678927	4.44575175730429	9.69030760812553
"ENSRNOG00000005905"	"Pde4b"	"ENSRNOT00000007738.6"	8.4715516639263e-08	2.7264731988917e-06	-3.56349299185679	0.66522971362366	1.08859931536845	0.362283118080165	0.415765314409139	0.615022878717726	0.247682833526357	0.154357461384068	0	0	0	0	0	0.359022321223491	0
"ENSRNOG00000056567"	"RF00100"	"ENSRNOT00000078132.1"	8.47508447553761e-08	2.7264731988917e-06	-3.8980274454921	0.727690546794096	1.70449158796124	9.91887126276924	15.4506186495939	8.43202353067524	15.5442186899587	28.0102838878317	0	0	0	0	1.53242970838371	15.4712032041658	0.306485941676742
"ENSRNOG00000047853"	"Ss18l2"	"ENSRNOT00000073376.2"	8.49699784574281e-08	2.72909248475017e-06	1.01720803019202	0.189910714334442	5.72199533418237	17.379779395162	15.4570340670162	15.1217080335078	37.4188449539265	27.4613855736613	44.6531865282478	46.9539185882623	48.797228952505	72.9619394523616	45.3926988858115	22.5677504046548	51.7517944814376
"ENSRNOG00000017309"	"Rsrp1"	"ENSRNOT00000023289.7"	8.86795665287904e-08	2.84362940113437e-06	-1.26513025190799	0.236538667029663	5.00589447387371	4.58975437862203	9.53749550283575	9.14586102928336	13.3457152637826	17.6471404756726	2.948696145749	2.2111952138924	1.93349791526852	2.80483447288233	2.55676352042459	10.8531933300393	2.49099745364337
"ENSRNOG00000026236"	"Morc3"	"ENSRNOT00000076354.2"	8.9082425281988e-08	2.85193283006972e-06	3.60809601768748	0.674701418797366	3.4088103649351	0.389773379067071	0.681379140898261	0	0.310561329272678	0.181492822620321	6.25457619010067	9.40091260206557	16.9743608923239	4.54790689913463	3.2888699299057	0.312641334371666	8.09332530270609
"ENSRNOG00000016777"	"AABR07018321.1"	"ENSRNOT00000022706.7"	8.9270667006614e-08	2.8533496904356e-06	0.895582523099406	0.167482789500326	6.35554589684705	11.1612635466596	12.1336153236395	12.6797426046929	8.97302710306112	9.37321092364494	24.1330573324804	33.9260340580209	21.1301412045832	23.5214237994789	17.2946933355902	10.8641719003396	24.0010699460307
"ENSRNOG00000009183"	"Szrd1"	"ENSRNOT00000045226.5"	9.00167020632665e-08	2.87256197228301e-06	0.875606178023558	0.1637931767751	6.95558020085452	10.7764155111675	11.9590529399351	10.0351737275365	8.9397142085887	9.88126364552536	19.5828828669025	22.0810169090105	22.9178051599744	24.8400321723872	20.7436334874207	10.3183240065506	22.0330741191391
"ENSRNOG00000008471"	"Kif21b"	"ENSRNOT00000090599.1"	9.04594313009731e-08	2.88204911590255e-06	0.994059856705925	0.185982346510361	6.16100107031843	1.9228986529334	1.79265249884521	2.60719447935134	4.03763004036549	3.14912674098075	5.15739872309241	7.09465574050902	7.02137773243201	7.24152177080949	5.01633072331555	2.70190048249524	6.3062569380317
"ENSRNOG00000036451"	"AABR07051207.1"	"ENSRNOT00000054562.1"	9.06852170293162e-08	2.8846050495505e-06	1.45531242604925	0.272302806425152	4.32050893412129	188.030364604817	162.837671161368	168.266726933037	32.801655149533	17.5645794658931	382.775387179722	707.226896155621	533.627305503527	137.401860009729	118.003139264427	113.90019946293	375.806917622605
"ENSRNOG00000016208"	"Setbp1"	"ENSRNOT00000021717.7"	9.17076711841022e-08	2.91245339720409e-06	0.897011216951979	0.167903153736037	6.33402612443302	4.43475113584228	4.55346841207334	4.95952960744321	4.11482413128772	3.92922004788699	9.42427828831453	10.1427520986779	8.94393135165135	8.94375307478056	10.5898520792959	4.39835866690671	9.60891337854405
"ENSRNOG00000058389"	"AABR07006475.1"	"ENSRNOT00000088585.1"	9.36984433064564e-08	2.97091528160648e-06	-2.01348089371829	0.377159521268189	3.75460747885324	1.9387803988564	2.16419421784194	2.05289447969158	4.24538376288706	4.10645054522204	0.152047647090781	0.135285020145392	0.758411389845775	0.549056043451692	0.344420261801641	2.9015406808998	0.387844072467056
"ENSRNOG00000019028"	"Znrf1"	"ENSRNOT00000025716.6"	9.42230497769908e-08	2.98277664126298e-06	1.27939834230943	0.239698726178955	6.46577017078599	24.8247430204136	16.8427607424951	28.4001573456658	19.8886333759392	30.4739039109999	64.8573104753714	43.1147235527703	96.4221449851976	57.3242807039347	148.144040617038	24.0860396791027	81.9725000668624
"ENSRNOG00000018225"	"Tp53inp2"	"ENSRNOT00000055310.4"	9.77035916832534e-08	3.08802564017071e-06	2.89634750756566	0.543308568466891	9.24679586078199	17.2529418385457	17.697309703914	19.2305660205851	51.8171751266077	73.0293102360367	182.576582816605	346.972287941887	204.780576863309	1349.754914841	1389.09352539471	35.8054605851378	694.635577571502
"ENSRNOG00000060517"	"AABR07069008.2"	"ENSRNOT00000088160.1"	9.92543827622334e-08	3.13204475031717e-06	-3.75496732700328	0.704750063031556	1.92518824466445	0.602804303740852	0.595346284369731	0.458304276941209	1.67619241385409	1.21789043411935	0	0.0252874120184407	0	0.0712184028797907	0	0.910107542605046	0.0193011629796463
"ENSRNOG00000018109"	"Clic4"	"ENSRNOT00000024464.4"	1.00992337973326e-07	3.18182060670493e-06	1.30725148076696	0.245496497378151	6.3965457792997	17.6795290113438	21.542913898169	11.5054507971785	13.9814904648229	12.9000760134029	54.857949739397	74.0128535576712	21.2364541946108	69.2557146376563	49.5793484760785	15.5218920369834	53.7884641210828
"ENSRNOG00000018850"	"Ttc9b"	"ENSRNOT00000025472.5"	1.01256553996262e-07	3.18508115959354e-06	1.66289564861683	0.312312878446552	6.68764641998492	16.2188243565737	18.9634593362886	20.4824381739047	46.4971294299539	40.4737051746344	74.9535950133263	102.415223952359	98.9500568564536	301.318657534984	111.48939762222	28.5271112942711	137.825386195869
"ENSRNOG00000016722"	"Xpo6"	"ENSRNOT00000043433.3"	1.03589627649897e-07	3.25330531083678e-06	-3.88489154012129	0.730199990696331	2.21648416131867	1.83481011460792	1.27984485805703	1.40880513274172	1.56577098743556	1.90057472097254	0	0.103408998232064	0	0	0.127351642730564	1.59796116276295	0.0461521281925256
"ENSRNOG00000025768"	"Clk1"	"ENSRNOT00000030934.6"	1.04019329971321e-07	3.26163142728113e-06	-1.81439635225349	0.341080247951719	5.21997251921829	16.7577492301953	16.0815390799863	17.1628628337824	10.4369696485545	9.20257557720167	3.88949237491512	2.07749694895587	3.65510995369939	1.18211371093283	0.777313206425994	13.928339273944	2.31630523898584
"ENSRNOG00000016758"	"Loxl2"	"ENSRNOT00000085237.1"	1.05204814952486e-07	3.29359212940507e-06	-3.71354774465734	0.698363952719114	1.77924329763447	2.09811618525109	0.827115992494776	1.50931892048879	0.417645466805915	0.40156692910099	0	0	0	0.205443405314452	0	1.05075269882831	0.0410886810628904
"ENSRNOG00000009837"	"LOC679811"	"ENSRNOT00000013260.7"	1.05558067000186e-07	3.29943882293798e-06	-1.18423548293144	0.222731021290127	6.1360563011846	7.48727443683145	6.04577190524664	7.85968674168739	9.25705773511367	10.7556271805976	1.92932210045666	1.44296143589297	1.56263484254981	3.77494660692608	3.23337042335622	8.28108359989535	2.38864708183635
"ENSRNOG00000009836"	"Rbm26"	"ENSRNOT00000013255.7"	1.06043741054092e-07	3.30939971097471e-06	-0.910344158778167	0.171244453363986	6.36993588819152	9.66305782777277	9.02436217647493	10.1397575083947	9.12247812513657	8.26959457745902	2.25173260315682	2.56459534615223	3.9918879141244	4.97037889164673	3.44213070066794	9.2438500430476	3.44414509114962
"ENSRNOG00000017144"	"Mea1"	"ENSRNOT00000023495.4"	1.08067705281256e-07	3.36237422307848e-06	0.877517289712682	0.165176386324096	6.67580518996911	37.9568209036037	42.0327311024889	39.1534365819575	28.660635975074	37.1951414892087	106.373865669532	84.7921120671685	86.2943539034168	65.6056188136273	55.3254434790434	36.9997532104666	79.6782787865576
"ENSRNOG00000052189"	"AABR07000452.1"	"ENSRNOT00000090103.1"	1.08080556093303e-07	3.36237422307848e-06	-1.86859649760343	0.35173013575919	5.28366704036701	9.86232925901701	9.03564763591692	11.439606726659	17.5358565480715	22.9225947202518	0.990132008568012	0.879912925217321	2.14331135570065	2.19012243401829	4.69318179595061	14.1592069779832	2.17933210389098
"ENSRNOG00000018198"	"Dapk1"	"ENSRNOT00000080750.1"	1.0857957093245e-07	3.37260400810087e-06	-4.41512022952188	0.831199347546675	1.51441299720206	1.06423778782446	0.761708549902161	0.764718128894779	0.0752197289584557	0.142999389067652	0	1.30614954829932e-09	0	0	0	0.561776716929501	2.61229909659864e-10
"ENSRNOG00000058616"	"SNORD113"	"ENSRNOT00000085624.1"	1.0898307090702e-07	3.37983961841067e-06	-3.76361691349956	0.708636198890268	1.46902540582059	57.5203481226931	32.9553758750403	44.6032996631567	17.2535572278686	20.04898344548	0	1.69331917394534	0	0.000241787928189304	0	34.4763128668477	0.338712192374706
"ENSRNOG00000057042"	"Pcca"	"ENSRNOT00000077482.1"	1.09574577951079e-07	3.39287408008834e-06	1.20392851701572	0.226724937557212	5.10881592778897	2.55470333192035	2.08365461707003	3.023483605575	1.17675040481245	2.25181940440178	8.31652545436571	8.77781276498787	6.78427873276007	3.46216440605177	5.79324189693147	2.21808227275592	6.62680465101938
"ENSRNOG00000009823"	"Naa38"	"ENSRNOT00000013071.6"	1.10205769357272e-07	3.40709474470055e-06	1.13625338443073	0.214022489641909	4.97571279607115	7.01574259862101	8.17248575395478	6.84904778403016	6.47344909342247	8.60732576785208	24.2252540543689	23.7873916236724	24.2407421020997	16.306427467829	14.7507071199628	7.4236101995761	20.6621044735866
"ENSRNOG00000011841"	"Map2"	"ENSRNOT00000092485.1"	1.10517221603363e-07	3.41140152728014e-06	2.12561617016483	0.400415750898499	6.89967311363788	5.41381752303436	7.73502927300681	5.08886853771851	13.4876295712699	17.4830653032882	53.1686571303355	46.3384004738887	29.7673961871689	191.203033029514	82.455951946916	9.84168204166356	80.5866877535646
"ENSRNOG00000014272"	"Rpl35"	"ENSRNOT00000019162.6"	1.12390561624794e-07	3.46383166363694e-06	1.96602743310281	0.370566971504578	7.58487889861126	179.937337732834	230.765931638094	203.078391211722	76.4075640840602	76.3722439075484	1139.82238942441	1428.28905924242	1052.88030052224	538.425905541217	450.186854100603	153.312293714852	921.920901766178
"ENSRNOG00000019024"	"Trim67"	"ENSRNOT00000032359.4"	1.22139882805248e-07	3.75845661110496e-06	1.09184739561565	0.206388070769999	5.37397655600119	1.60168502470551	2.25172030004881	1.89845269931449	3.25178653226876	2.59351339362693	3.91450760361602	9.14038379047705	4.21388111801638	7.90248107373769	6.43891734425341	2.3194315899929	6.32203418602011
"ENSRNOG00000033099"	"Dcc"	"ENSRNOT00000064947.3"	1.22764124447862e-07	3.77180876617562e-06	0.876028611368848	0.165621797105215	7.54796613811047	13.9974556887796	13.2130951116809	13.7497758498672	10.9190949585018	13.8166635447269	26.3900915876748	25.0474118358719	26.9828083794503	29.2197465490587	33.1044618802045	13.1392170307113	28.148904046452
"ENSRNOG00000061155"	"LOC100911851"	"ENSRNOT00000085965.1"	1.25511931104021e-07	3.85026306298512e-06	-3.4794651150366	0.65833114681115	1.04658537695835	0.20116957376823	0.26223167788846	0.385482755259716	0.200515286527308	0.387408144085732	0	0	0	0	0	0.287361487505889	0
"ENSRNOG00000046647"	"Impad1"	"ENSRNOT00000072803.1"	1.26231083692488e-07	3.86633908119634e-06	-0.869898307893594	0.164621425321518	7.14882093527631	13.8997433950137	15.9541372429109	13.6329736344319	17.0122658183364	13.3611146054472	4.65080234895593	4.92525927170019	4.10853654008312	6.67090232439747	7.96433992323389	14.772046939228	5.66396808167412
"ENSRNOG00000006589"	"Mif"	"ENSRNOT00000008608.4"	1.27193176541467e-07	3.88380150927928e-06	0.899349188020995	0.170239564297522	6.09257531612231	63.1300049678436	73.4753296809868	82.0713085013881	105.972878629453	113.215687087281	169.454607790325	186.130783641068	196.223809591884	171.980050250936	155.582557115494	87.5730417733905	175.874361677941
"ENSRNOG00000056076"	"LOC103694877"	"ENSRNOT00000077564.1"	1.27193176541467e-07	3.88380150927928e-06	0.899349188020995	0.170239564297522	6.09257531612231	63.1300049678436	73.4753296809868	82.0713085013881	105.972878629453	113.215687087281	169.454607790325	186.130783641068	196.223809591884	171.980050250936	155.582557115494	87.5730417733905	175.874361677941
"ENSRNOG00000030579"	"AC126572.3"	"ENSRNOT00000074138.2"	1.2802948724106e-07	3.90332361331704e-06	1.16108993133017	0.219834929188336	4.86717222277924	1.69374130554393	1.7359183427579	1.56877657602004	1.26647490988797	1.18446876896156	4.66457545709407	3.88414831189527	6.28012015040566	3.60396361749373	3.1939801453913	1.48987598063428	4.32535753645601
"ENSRNOG00000004245"	"Mgst3"	"ENSRNOT00000005719.7"	1.29000523676272e-07	3.92688690889812e-06	1.34380600068577	0.254496168292964	6.82533685112677	41.7148854286965	37.3399077771954	35.4359700201996	83.3510815434396	101.899603522469	130.717478368369	160.758707751938	172.179341492006	323.624436325127	165.48172851623	59.9482896584	190.552338490734
"ENSRNOG00000015614"	"Ppp1r16b"	"ENSRNOT00000021133.7"	1.31378000677759e-07	3.99312552059991e-06	1.28847817745485	0.244172701522192	5.48123219656697	1.73193168087659	1.81514934002299	2.06672796176955	3.53048262568507	3.89873123365826	4.77067792552422	5.98767805085819	9.14323133631227	11.657674145287	10.4307911891714	2.60860456840249	8.39801052943062
"ENSRNOG00000017116"	"Zfp532"	"ENSRNOT00000082403.1"	1.31972050135427e-07	3.99891455280392e-06	1.46706476516205	0.278059288206341	5.48053435875829	0.988952845886413	0.844481590086522	0.556755844387372	1.30169360881813	0.905877075104549	3.94099724149141	2.22635770625625	4.81711913263292	1.75513212023811	6.50633265189972	0.919552192856597	3.84918777050368
"ENSRNOG00000017765"	"Net1"	"ENSRNOT00000023945.4"	1.31940384836008e-07	3.99891455280392e-06	0.964919022803173	0.182883854605834	5.67196889206935	3.29919047637567	2.43064023805876	3.40969714361497	2.37031978623902	2.38416967694195	7.56675920000525	6.75402556542105	5.30001493367569	6.71561975053028	5.9727590928503	2.77880346424607	6.46183570849651
"ENSRNOG00000041291"	"AABR07044767.1"	"ENSRNOT00000063044.2"	1.33648752002416e-07	4.04353789073569e-06	-1.94773780308073	0.369325450522578	3.82359729154066	103.642082568088	105.853436570678	153.381383699817	168.341784120404	180.097046445802	12.0822838008681	14.8241645459286	33.1647651960632	17.0749653131748	21.6211098759058	142.263146680958	19.7534577463881
"ENSRNOG00000008237"	"Unc13b"	"ENSRNOT00000067281.4"	1.34130357449153e-07	4.04551217518199e-06	-3.76209177719608	0.713448238373457	1.5466576846747	0.402695377219887	0.106510989675109	0.689358419919576	0.340320846120722	0.871603444613117	0	0	0	0	0.0288699987331727	0.482097815509682	0.00577399974663454
"ENSRNOG00000001182"	"Ndufv3"	"ENSRNOT00000086272.1"	1.34326437466304e-07	4.04551217518199e-06	1.27652251028294	0.242093781232062	6.09608371824911	39.820660709686	45.2427787811889	46.0659082038389	33.7765369903402	27.1436354643597	153.588136368689	163.19079165311	139.723056153709	99.8530083580269	60.6505423766982	38.4099040298827	123.401106982047
"ENSRNOG00000028690"	"LOC100362366"	"ENSRNOT00000037043.3"	1.34290620708274e-07	4.04551217518199e-06	1.73345972381233	0.328749334242554	6.62626184245905	82.1061800217649	79.9846313473679	66.2675533971853	39.7145116044168	31.3625578533582	340.961015781614	451.861673652469	356.93266380243	178.48301577766	148.302013785578	59.8870868448186	295.30807655995
"ENSRNOG00000003108"	"Acbd4"	"ENSRNOT00000004163.4"	1.35664086138236e-07	4.0795981714741e-06	0.990348748095177	0.187885425153485	5.51784543962532	3.9374182952178	4.76582673738072	4.79400478415727	4.7492633027391	3.9567818310245	11.1077657664896	10.229417176754	9.90568254378798	13.6606247067668	8.66042500684819	4.44065899010388	10.7127830401293
"ENSRNOG00000008329"	"Ndufb11"	"ENSRNOT00000011183.4"	1.3627330016315e-07	4.08669408300727e-06	1.14311523623843	0.216901575771483	5.92586213930962	17.3892075024631	17.3626595578637	16.3640243471013	13.4739200308202	11.5735417167595	55.2117497592169	52.0866052101017	59.8612977542048	31.5428998230388	22.8448075398016	15.2326706310016	44.3094720172728
"ENSRNOG00000004036"	"Snx12"	"ENSRNOT00000076403.1"	1.36312498807479e-07	4.08669408300727e-06	0.89326434081962	0.169495058486084	6.22554746119632	7.85051173595689	8.24654716939842	7.19569536876508	7.45249354796582	5.92273090122714	16.5380953760282	20.1122428018617	15.6493767137367	17.5161765607738	10.9478533131664	7.33359574466267	16.1527489531134
"ENSRNOG00000034246"	"Rps27a"	"ENSRNOT00000049535.2"	1.37600930063989e-07	4.11909007715719e-06	1.7941451349822	0.340546919283068	7.90462465433241	218.873948751313	242.468073888959	194.617214532132	86.9652735693531	78.1488562410785	1010.27345552564	1265.1372777892	907.534641053511	545.760368226446	424.196426539807	164.214673396567	830.580433826921
"ENSRNOG00000008461"	"Smdt1"	"ENSRNOT00000011316.6"	1.39934454340823e-07	4.18262606587043e-06	0.9889181432737	0.187816780380801	5.51170506771986	52.2838519834917	41.8654838348089	47.8056374411889	66.6655992479827	61.0410300365586	113.785564379342	76.9913401242011	120.357853516752	174.64920554125	127.640430424355	53.9323205088062	122.68487879718
"ENSRNOG00000017201"	"Cd2bp2"	"ENSRNOT00000023285.5"	1.40168034168614e-07	4.18329809204733e-06	0.862329630055097	0.163784435510866	7.01670190798533	11.9944453203448	14.0042331594849	13.5498005115656	11.8707941589236	10.6236391676975	28.4542952118198	31.8616606340343	23.6282894664467	25.9731983937758	21.529301131993	12.4085824636033	26.2893489676139
"ENSRNOG00000014264"	"AABR07027306.1"	"ENSRNOT00000046523.4"	1.43713562955283e-07	4.28266417606742e-06	1.25354658710303	0.238297051192966	6.53959887036844	12.6415672859012	15.0149215412995	12.6380625895942	20.1834537078719	23.9111965826991	28.0523558004878	49.4198237783377	39.3409164758991	92.4835448778162	65.9718149409061	16.8778403414732	55.0536911746894
"ENSRNOG00000016675"	"Kcnn2"	"ENSRNOT00000067262.4"	1.44291226984941e-07	4.2934222900309e-06	-3.91087584589262	0.743555036663066	2.35097703472614	2.56586012259152	2.51196005784254	1.55991068423456	4.52095825712159	1.12961499242433	0.00929137385625924	0.230717636773849	0.0180233949886614	0.020485069303086	0.00304690826204616	2.45766082284291	0.0563128766367804
"ENSRNOG00000020905"	"Hdac5"	"ENSRNOT00000055187.4"	1.47086544255059e-07	4.36822662111883e-06	1.51957360934846	0.289102841843826	7.82533891715803	18.4210956481882	12.2473673275366	20.6815220587659	18.38095490152	36.1346963794507	55.703840750737	44.1190166179812	86.9961976481712	99.9112775192364	161.881659545887	21.1731272630923	89.7223984164026
"ENSRNOG00000060344"	"AABR07073045.1"	"ENSRNOT00000072795.2"	1.47246070692203e-07	4.36822662111883e-06	2.54536768478301	0.484281217340251	4.1775003358772	5.52270709828598	5.9104695214728	3.38655947595106	1.58504786016698	1.52042609557783	35.222131073994	28.2303588008549	57.3005336880315	30.8176333851385	27.503835968799	3.58504201029093	35.8148985833636
"ENSRNOG00000018835"	"Notch2"	"ENSRNOT00000025718.4"	1.47788156679989e-07	4.37775470990634e-06	-1.37509158226854	0.261658352644587	6.10349431983651	5.09836170849688	5.83875263612111	3.61775796939701	3.1621004823546	2.97734239126677	1.10623177515335	2.03461730708557	0.561520218871317	0.650254513336676	0.715037162464817	4.13886303752727	1.01353219538235
"ENSRNOG00000043550"	"AC139392.1"	"ENSRNOT00000068817.2"	1.52865196529267e-07	4.52138746212011e-06	-3.40372593506014	0.648443052861216	1.00871578697012	35.3732798472617	65.0430507456693	61.6678534050112	27.724637522294	46.3695281768818	0	0	0	0	0	47.2356699394236	0
"ENSRNOG00000016789"	"Actr1b"	"ENSRNOT00000022779.6"	1.53235334390372e-07	4.52558065814307e-06	0.864846131685797	0.164775627012557	7.42918384365193	16.03671380914	15.4569996738567	17.7036558012636	18.7238319092392	18.497667026594	39.2462943464164	32.6086695639718	40.7374815544105	44.8500043857248	27.4905017754094	17.2837736440187	36.9865903251866
"ENSRNOG00000061902"	"Wbp1"	"ENSRNOT00000084381.1"	1.55747871251836e-07	4.59293982827028e-06	1.30957230636306	0.249650073686402	4.94496460336581	7.12217216654687	4.27648382170672	5.68381553948378	4.28662626781627	6.75519233026608	9.2881425011679	18.9696657345737	17.4808188227087	30.1172340965013	20.2209544056996	5.62485802516394	19.2153631121302
"ENSRNOG00000017116"	"Zfp532"	"ENSRNOT00000064250.1"	1.56218863116236e-07	4.59998396786694e-06	0.879109852741582	0.167606730482529	7.22196090242595	6.88159522896451	6.40752942385473	7.24698095084673	6.33831403588625	8.62211216546043	11.9455982569062	16.6421784607283	16.0577434164201	17.5638448526946	14.272642979335	7.09930636100253	15.2964015932168
"ENSRNOG00000016896"	"Rpl3"	"ENSRNOT00000092616.1"	1.58828719543839e-07	4.66989426587576e-06	-3.70401368629732	0.706600538344149	2.62747241227626	3.54548514100719	3.04254068982014	2.21805618397307	8.81702697984486	9.12242508852142	0	0	0.555236244690005	0.10552082372105	0.224996153779521	5.34910681663334	0.177150644438115
"ENSRNOG00000013152"	"Arhgap10"	"ENSRNOT00000017867.5"	1.60668599770335e-07	4.69053740940676e-06	0.912557265073691	0.17415566290191	5.96615271426722	5.67413414463481	4.5156065077028	6.3460667087657	2.95318096555236	4.9234778295225	10.5045775989649	10.6730990420564	14.9165011319119	7.76478748370836	9.78691016802773	4.88249323123563	10.7291750849339
"ENSRNOG00000037137"	"Svip"	"ENSRNOT00000056024.4"	1.60714280717928e-07	4.69053740940676e-06	1.01564849099986	0.19383189846653	5.35926477701136	6.26104256803379	8.68896090146653	6.0455790538227	5.09207189045277	4.72768069834255	16.7954936738329	14.8222799731316	15.9361042934895	10.9741151718939	15.9857973794183	6.16306702242367	14.9027580983532
"ENSRNOG00000013358"	"Aqp11"	"ENSRNOT00000018091.5"	1.60040997367648e-07	4.69053740940676e-06	1.16509790524789	0.222320771202916	4.84619368295765	2.42352592068077	2.93509902829527	2.98467935478207	3.07028637184958	3.70421303232006	8.21595901350527	6.00581554369163	9.25684578243773	13.4332346610925	7.42397573390618	3.02356074158555	8.86716614692666
"ENSRNOG00000030213"	"Vps13c"	"ENSRNOT00000057522.4"	1.59784770974561e-07	4.69053740940676e-06	-0.889321968295055	0.169688394252813	6.26099991360564	3.32458654348339	3.18031983124925	3.79318279621764	3.32297564797265	3.60617154499246	1.30262814691071	1.18794832398342	0.926334969174369	1.08493566247579	2.04216465932011	3.44544727278308	1.30880235237288
"ENSRNOG00000057696"	"Sbk1"	"ENSRNOT00000082228.1"	1.60410758013383e-07	4.69053740940676e-06	1.47466589433351	0.281414548487717	7.33154066950241	4.67603328472538	8.04776207077199	7.12632363506982	14.4480828040528	12.9499161869277	28.4060703157721	36.8860781673316	25.38143953428	67.7384315283821	24.9951783710831	9.44962359630954	36.6814395833698
"ENSRNOG00000059963"	"AABR07070416.3"	"ENSRNOT00000083564.1"	1.61326294250301e-07	4.70147525464442e-06	-1.70517697149534	0.325468845966426	4.11225213331428	8.82250231926452	7.11026529837736	11.1442364654047	5.27930465200454	6.37505490441259	1.2601486296589	0.628248653370036	1.95053836555079	0.561810089010543	2.62309851623943	7.74627272789274	1.40476885076594
"ENSRNOG00000008868"	"Dusp19"	"ENSRNOT00000057826.2"	1.62451663051491e-07	4.72731953992862e-06	1.14212920991973	0.218052757616035	4.90518017687522	5.16685849147525	6.00839055458836	3.11159584995077	4.53034429271244	4.09059193849751	10.9219508516298	18.4761828465568	11.0934676695042	10.8368115497514	12.1793112179	4.58155622544487	12.7015448270684
"ENSRNOG00000012266"	"Zcchc17"	"ENSRNOT00000017156.4"	1.66062112082408e-07	4.82529747087549e-06	0.872184228657275	0.166644616847045	6.44125029551024	15.15470635067	13.8553255208336	13.7248300352161	9.72191505642033	9.05997652693018	33.0626188532769	27.07408913106	26.9542187202434	23.0401097750492	19.7771968423257	12.303350698014	25.981646664391
"ENSRNOG00000050338"	"AABR07005779.4"	"ENSRNOT00000070913.1"	1.67166438484487e-07	4.85027424809235e-06	-2.97919781189764	0.569356167646674	3.17053427210282	106.247256874438	93.9891998888273	121.76198824667	176.828939545484	131.407226322808	2.77771370282055	4.32048574751312	11.4238529881259	1.18303000399649	21.3788499448437	126.046922175645	8.21678647745995
"ENSRNOG00000052583"	"Zfp106"	"ENSRNOT00000081074.1"	1.68114492120092e-07	4.87065042447933e-06	0.871875581818791	0.166657918808656	7.65491505908209	13.0525259246704	12.7702869309149	13.9725171923217	8.95451119683144	10.1696260246833	27.3222192497936	32.0052857015098	24.2632736906598	21.0746340740427	20.9393087541903	11.7838934538843	25.1209442940392
"ENSRNOG00000019511"	"Mrps18a"	"ENSRNOT00000026499.5"	1.74051401111222e-07	5.03529432966583e-06	0.909514866912686	0.174066159156834	5.97671484215379	16.221484804944	17.1495882300706	21.1393023166615	15.5474226412845	13.6806090848984	38.2112162257381	33.003900300224	48.0389822173112	40.4069015159417	25.6830559380377	16.7476814155718	37.0688112394505
"ENSRNOG00000005711"	"Ptprd"	"ENSRNOT00000075474.3"	1.79549421360143e-07	5.18677971296495e-06	-0.858245576831089	0.16443524790239	7.23103908382169	13.1628086069464	11.7224031767275	11.6608497630706	7.95952564614246	9.30085465271307	4.44266942477704	3.8723894399537	4.70088968997699	2.92488512601047	4.35612880557144	10.76128836912	4.05939249725793
"ENSRNOG00000012061"	"Prkcb"	"ENSRNOT00000016442.8"	1.80950279992948e-07	5.2147813394813e-06	0.963986464498444	0.184745594372752	5.94711221005481	5.20132192039708	8.40834552663619	6.93738179551244	5.51777111499099	4.79649144342444	11.5513806194816	22.9408483626554	17.3928861214715	10.2532622536506	11.7328277966621	6.17226236019223	14.7742410307842
"ENSRNOG00000054204"	"Gria2"	"ENSRNOT00000077941.1"	1.81103628714647e-07	5.2147813394813e-06	-1.63221239726744	0.312818831720174	7.53445727125909	22.7179494305179	20.3447422368759	24.417209107453	46.1419418678245	46.8382120631397	3.89260772925902	2.43128214907757	7.30360481437864	5.51329265721226	10.2923579047658	32.0920109411622	5.88662905093866
"ENSRNOG00000060721"	"SNORD113"	"ENSRNOT00000088604.1"	1.813081870567e-07	5.2147813394813e-06	-3.33660488743178	0.639496848211541	0.975155263155944	24.748390563046	20.4354386073769	35.1036396766106	10.4168646891111	7.37695185854282	0	0	0	0	0	19.6162570789375	0
"ENSRNOG00000018105"	"Thtpa"	"ENSRNOT00000034073.3"	1.84814082887245e-07	5.30791402982105e-06	0.86786441061763	0.16644895423946	6.47459550830811	7.92706510103212	6.5653522797136	7.59169723795944	9.92327546959292	10.8844846083777	17.3130419259352	15.1773185140236	15.180550118983	22.9715233754842	19.9452401170587	8.57837493933516	18.1175348102969
"ENSRNOG00000061253"	"AABR07006038.1"	"ENSRNOT00000088263.1"	1.85094083253002e-07	5.30826258730063e-06	-2.90366402781246	0.556927849863135	4.88173426738214	15.2551963754974	11.6716966140984	16.6955307519769	40.15416406515	44.615926163289	0.244389592515856	0.48734484994094	1.15262132214845	2.86622615470645	3.22380634149577	25.6785027940023	1.59487765216149
"ENSRNOG00000058428"	"AABR07028568.2"	"ENSRNOT00000085781.1"	1.88683256110803e-07	5.40337584732337e-06	-3.32705448291078	0.638571153137558	0.970380060895446	2.01536637696316	3.16967667051569	4.35195899232511	4.63087601019997	3.40804430807292	0	0	0	0	0	3.51518447161537	0
"ENSRNOG00000033568"	"Mapk8ip3"	"ENSRNOT00000042066.3"	1.95583089743777e-07	5.59104040439729e-06	0.88729298903273	0.170518910155029	8.00360081936406	20.5512704385743	22.7578151802986	24.8091591049984	21.0104565943443	30.1361366082949	46.2543781190165	39.7955081960421	57.489585449597	39.1026264512776	84.2821039376044	23.8529675853021	53.3848404307075
"ENSRNOG00000020602"	"Ndufa13"	"ENSRNOT00000027980.7"	1.95800678238468e-07	5.59104040439729e-06	1.10406024274572	0.212185405026235	5.76727423151472	34.5814031951798	44.9593828601813	31.3268917786394	22.1345038385476	26.8232152430875	112.426312698063	90.2294116504196	94.7211959503102	64.4684276181524	54.4513370781891	31.9650793831271	83.2593369990269
"ENSRNOG00000042449"	"LOC100362023"	"ENSRNOT00000063891.2"	1.96996431586245e-07	5.61709105718651e-06	0.855319078152173	0.164416467472594	7.35264593588235	17.6798866074189	16.5206887532057	16.3911438807462	19.3190016369787	17.0201096040134	29.3722884857916	27.9854526852888	34.5664967973269	58.0981552726923	38.402300735937	17.3861660964726	37.6849387954073
"ENSRNOG00000051844"	"AABR07000248.1"	"ENSRNOT00000091348.1"	2.02074034815113e-07	5.75359360334927e-06	-1.36817574291145	0.263241354916994	5.10822945361818	21.9362527731372	19.8837465438998	25.5267340296448	20.4509725100183	21.7428740263243	5.8802640552411	2.73286210218343	4.16711503239312	3.28587637560922	12.399521278326	21.9081159766049	5.69312776875057
"ENSRNOG00000047795"	"AABR07002680.1"	"ENSRNOT00000074222.1"	2.0241409620856e-07	5.75500738101154e-06	-3.64332029651686	0.7010285615824	2.06337780228356	179.664582230265	86.6804899391639	204.233810852551	160.60300368492	137.927749317271	0	0	0	10.1535737857222	2.41598381825873	153.821927204834	2.51391152079619
"ENSRNOG00000020595"	"Rps11"	"ENSRNOT00000066328.3"	2.09446729884401e-07	5.94642671363779e-06	1.6059780780183	0.309392195437543	7.60998283374431	134.588502080393	154.450328885766	130.22502186527	63.3815058885223	59.1941609496157	606.001856628998	690.7577717652	514.764623840475	302.107490759143	240.04243658519	108.367903933913	470.734835915801
"ENSRNOG00000007235"	"Atp5mc1"	"ENSRNOT00000009815.5"	2.11957757818317e-07	6.0091085646432e-06	1.03805529284717	0.200067223267875	7.28994146064644	86.3941212475852	80.9316290817128	97.9049781045258	133.875151150315	187.286300920021	212.580135625712	203.744661586543	294.206996239118	456.44939637522	259.486796174688	117.278436100832	285.293597200256
"ENSRNOG00000021147"	"Bad"	"ENSRNOT00000028712.5"	2.14760174857828e-07	6.07986055022512e-06	0.895900015412047	0.172750720203278	6.02961774179193	14.0684190865036	15.6513512159931	13.46903825217	16.0857698724744	17.6764351983141	29.3053819833492	40.6051648528347	39.4904723375724	31.04826838032	27.4099394151366	15.390202725091	33.5718453938426
"ENSRNOG00000027491"	"Vldlr"	"ENSRNOT00000035814.3"	2.16557151679594e-07	6.12198726795223e-06	-0.882090823330414	0.170138925669781	6.23439591695261	12.2208635640851	10.4433366257083	14.3481512656944	10.2087030650445	10.3892571784785	4.02750795882449	3.35903196893293	5.963627464159	3.74797081567665	4.35159607869278	11.5220623398022	4.28994685725717
"ENSRNOG00000056248"	"Marf1"	"ENSRNOT00000091520.1"	2.20036154222111e-07	6.21147645045523e-06	0.864047330541372	0.166754240079034	6.78921721309207	3.48729217400245	3.36735330277418	3.52418680898255	4.12764937853122	3.5515225163597	7.74424084273216	8.59634583740837	6.77074556231677	7.51938462649095	7.62866772429925	3.61160083613002	7.6518769186495
"ENSRNOG00000025909"	"Uqcc2"	"ENSRNOT00000036871.5"	2.20892687999338e-07	6.22678577252188e-06	1.40146850410744	0.270510065589968	5.1414774692414	18.250723608967	14.857883458958	18.0811723961322	7.83700358514901	9.78396802511082	55.1829506531624	61.1100175396838	55.6318359300915	44.5980245976103	23.9879010774205	13.7621502148634	48.1021459595937
"ENSRNOG00000025695"	"Tns3"	"ENSRNOT00000012661.7"	2.23654476435427e-07	6.29568289704667e-06	1.69651703427215	0.327606615462689	6.6485068863817	2.98452040668951	3.61736668277101	2.24536999635477	1.54200542248379	1.14749605346955	16.3551383451199	20.6024243483266	9.1103929032963	7.79621292781742	4.92512873603877	2.30735171235373	11.7578594521198
"ENSRNOG00000060590"	"AABR07046248.1"	"ENSRNOT00000086451.1"	2.2680795698546e-07	6.37539472848349e-06	-3.60535172328926	0.696564409752099	1.62194331055461	85.6412672547199	75.0444734955349	97.404468191916	85.3593400708243	91.326317601394	0	0	0	5.91992810820094	0	86.9551733228778	1.18398562164019
"ENSRNOG00000011063"	"Dennd1b"	"ENSRNOT00000043907.6"	2.27836957355529e-07	6.39438184178678e-06	1.37778818334982	0.266236142201411	5.41772451712936	3.85071429888523	2.99231021913922	4.22834624323553	1.69398835239227	1.20627158487698	9.63908006813588	11.8510708239496	10.536820065474	6.60668970505033	6.95648011152491	2.79432613970585	9.11802815482694
"ENSRNOG00000045800"	"AABR07016640.2"	"ENSRNOT00000074862.1"	2.28128776411326e-07	6.39438184178678e-06	-3.84335241830245	0.742702390600478	2.24628168115881	46.3717495729157	65.9160060057202	80.714767236391	114.794977334766	86.6337527186427	0	0	0	1.90807852157059	25.6931988365353	78.8862505736871	5.52025547162118
"ENSRNOG00000015385"	"Pink1"	"ENSRNOT00000065497.2"	2.30001764857844e-07	6.43777538727102e-06	1.86511398572881	0.360527300154398	5.06966749303602	4.88883969663291	3.93177648049939	2.97639494921186	1.84690471411888	2.45623008522995	29.3003652445325	35.1603111422184	19.8273705183323	13.0125336793208	6.12374960249951	3.2200291851386	20.6848660373807
"ENSRNOG00000014625"	"Atp5f1d"	"ENSRNOT00000020670.4"	2.33443536267059e-07	6.52489500451946e-06	0.913016775583287	0.176581230248944	5.91923417376055	17.7178331388873	17.147267439566	16.8489732974034	16.1455411012595	23.9364660067547	36.36955841289	46.3527236448182	43.9462462836852	40.0560922102111	33.6353350318213	18.3592161967742	40.0719911166852
"ENSRNOG00000016374"	"Fgfr2"	"ENSRNOT00000065448.3"	2.38219845373403e-07	6.64002444703945e-06	-4.24146356299335	0.820917725060488	2.11538293263843	0.833950840347269	1.10478148746037	0.988396966853987	0.904678824167022	0.317121580149727	0.149852410739728	0	0	0	0	0.829785939795675	0.0299704821479456
"ENSRNOG00000002618"	"Ivns1abp"	"ENSRNOT00000084458.1"	2.38232698281528e-07	6.64002444703945e-06	-3.63299493012527	0.703152511458303	2.02690950498591	4.32010689163345	4.73528559239314	2.68218041379478	8.28355040182392	6.0798763432691	0	0.55915309231616	0	0.281698186945459	0	5.22019992858288	0.168170255852324
"ENSRNOG00000007335"	"Ccl11"	"ENSRNOT00000009756.5"	2.51720091095391e-07	7.00609135567044e-06	-3.59654625103135	0.697489420825996	1.56320009477802	0.745331451799518	1.20206954263998	2.2571781155127	2.05604791857642	2.63465665533309	0	0	0	0.224321428911961	0	1.77905673677234	0.0448642857823922
"ENSRNOG00000051885"	"LOC100360413"	"ENSRNOT00000089027.1"	2.52642657385338e-07	7.02190679018969e-06	1.08802725051602	0.211032565314113	9.32189972638343	251.187371531924	291.682301120716	284.263567752503	133.364090451745	135.270197834907	573.056599456769	710.382770272424	658.638401299327	450.671009625489	394.031972908115	219.153505738359	557.356150712425
"ENSRNOG00000030126"	"Clk3"	"ENSRNOT00000068108.2"	2.57316148726091e-07	7.14178448081924e-06	-4.3756058364338	0.849253544855241	2.31555184745133	1.52633623058116	4.98451890079692	2.44687336248699	2.63749013686894	2.80388931212361	3.69581248410414e-08	0	0.775978644102998	0	0	2.87982158857152	0.155195736212225
"ENSRNOG00000001062"	"Kmt5a"	"ENSRNOT00000066253.2"	2.59621951724573e-07	7.19570380045576e-06	0.961007147762664	0.186580741912313	5.56740872888482	10.8026974154943	12.9301642619994	9.06691930213976	7.79579279519947	8.76543180665137	24.5596036399258	32.3161443966391	26.9229826366567	14.3216598116335	18.5921116001617	9.87220111629686	23.3425004170034
"ENSRNOG00000004252"	"LOC108348062"	"ENSRNOT00000005786.6"	2.625461360607e-07	7.26658767921076e-06	0.844955502142312	0.164116109674884	7.03886882404298	35.411035829701	36.2615421412315	35.4885648516493	25.9194082702255	31.6264465434306	72.9534186588191	83.030227583649	69.3724519227067	55.4584629250129	59.5815597223398	32.9413995272476	68.0792241625055
"ENSRNOG00000040595"	"RF00152"	"ENSRNOT00000062348.3"	2.69771609248774e-07	7.4561561791952e-06	-3.26384010672359	0.63456527160778	0.938772872801851	13.7841365258659	15.0761007615385	24.3035127262974	7.94850335096906	13.247224662365	0	0	0	0	0	14.8718956054072	0
"ENSRNOG00000014182"	"Tns1"	"ENSRNOT00000035277.5"	2.71630513840299e-07	7.48665075490014e-06	1.5024968524446	0.292193064959137	5.30523737096643	0.660243119315688	0.880979889917458	0.429243813798505	0.808863299325724	1.10772640849307	2.3545567125557	3.98836302634887	1.29370253811852	5.07541563545665	3.82823043320728	0.777411306170089	3.3080536691374
"ENSRNOG00000062170"	"AABR07058158.1"	"ENSRNOT00000092920.1"	2.71359837988924e-07	7.48665075490014e-06	1.98740669445101	0.386480215446448	3.69919939398083	1.28846771282634	1.11817762126827	0.581319095445185	1.47255668605793	1.15646865290797	6.36555620687397	4.96622271461241	10.0349840368452	7.27234067919409	7.83004968982558	1.12339795370114	7.29383066547025
"ENSRNOG00000020687"	"Dpf1"	"ENSRNOT00000028091.8"	2.72494475317789e-07	7.5000319685731e-06	0.843693872952635	0.164093587382959	6.85790743173609	10.3474385973597	13.2613440194889	10.2587341757552	16.4502860302378	19.0040174530681	25.719299590897	21.6447732380099	28.4776965948205	30.744864455409	34.1724596834592	13.8643640551819	28.1518187125191
"ENSRNOG00000003611"	"Dynlt3"	"ENSRNOT00000004808.7"	2.7590705588951e-07	7.58029012943319e-06	0.842431900156364	0.163922692897153	7.22465455302738	20.9625646421409	22.0901025762624	21.5562661816182	24.4944976285997	18.6198332804941	42.1704120074186	32.1845958176178	57.4545850960761	56.3859269918804	38.8127860462227	21.5446528618231	45.4016611918431
"ENSRNOG00000056592"	"LOC102551357"	"ENSRNOT00000082096.1"	2.76175479308208e-07	7.58029012943319e-06	-3.57510145376063	0.695677712389221	1.54345071757654	3.61135934930673	2.79607570606627	2.38537565093246	6.89051973600165	6.27377094599907	0.521394521136285	0	0	0	0	4.39142027766124	0.104278904227257
"ENSRNOG00000003825"	"Wdr75"	"ENSRNOT00000050275.1"	2.86258347373787e-07	7.84617105104612e-06	-4.60836791420585	0.897918846274101	1.62595748553852	2.2523172148111	1.31751912214968	1.00722102671743	1.58390719199793	0.89444582483743	0	0	0.000898285947794412	0	0	1.41108207610271	0.000179657189558882
"ENSRNOG00000049846"	"Mir344g"	"ENSRNOT00000073580.1"	2.89406909989253e-07	7.92151482770309e-06	-3.52980000480605	0.688040945976464	1.33147004514901	22.711751904391	19.953848091336	28.7585880233521	33.8700712249822	23.0901346070273	0	0	0	0	1.6704720370321	25.6768787702177	0.33409440740642
"ENSRNOG00000057352"	"LOC100909912"	"ENSRNOT00000078986.1"	2.92713482788056e-07	8.0009697771185e-06	1.13903326535157	0.22211694599169	4.851878128363	1.7000538348023	1.87804417347843	1.3164133037667	2.71644435586341	2.88001897604919	4.36165580260293	5.86631816731208	6.14695792378798	7.06118664237512	4.98341330092495	2.09819492879201	5.68390636740061
"ENSRNOG00000057912"	"RF00105"	"ENSRNOT00000085944.1"	2.94062557642851e-07	8.02677369808316e-06	-3.55264931873492	0.692900651348154	1.45218142816061	18.9264599203258	22.3013596314931	25.9754988598019	40.5112616612532	44.8608329507959	0	0	0	0	3.3409440740642	30.515082604734	0.66818881481284
"ENSRNOG00000014925"	"Mesp2"	"ENSRNOT00000020047.5"	3.026508844989e-07	8.24983848433935e-06	-2.07437093479933	0.405009079118426	3.71384241199819	4.12305662723128	2.37599208578936	3.91063183244024	2.73174797983039	3.41034189317722	0.140256093132411	0.350435560224907	0.249645452335525	0.728052958648633	0.573424211830254	3.3103540836937	0.408362855234346
"ENSRNOG00000051572"	"LOC102555189"	"ENSRNOT00000083131.1"	3.06146076392621e-07	8.33364944487992e-06	-3.56827411661091	0.696979777898086	1.5542962978927	0.452092279932585	0.779952265394317	0.586736713945125	1.32731319235776	1.46009180918052	0	0	0	0.120638633755041	0	0.921237252162061	0.0241277267510082
"ENSRNOG00000053725"	"Usf2"	"ENSRNOT00000087381.1"	3.06622277820194e-07	8.33516279775416e-06	0.962391869279027	0.187991745654789	6.10226794165992	8.09466690453414	6.30322812541651	6.847041372483	11.3774589196959	13.8729276215988	16.2777810195581	15.7307750112563	20.9318148308509	25.9190295894401	26.9786817780416	9.29906458874567	21.1676164458294
"ENSRNOG00000053060"	"Zfc3h1"	"ENSRNOT00000081891.1"	3.11167442245168e-07	8.44713041503082e-06	-0.855253244594622	0.167154136345614	6.44677664040413	10.5907214090239	9.8618513786906	11.250579164744	6.35513554777161	5.56901642279806	3.16985825321882	2.83115099778063	4.16867853500905	2.87564377670019	3.01758817506887	8.72546078460563	3.21258394755551
"ENSRNOG00000010137"	"Xpo4"	"ENSRNOT00000013901.6"	3.13728113268314e-07	8.50499318828752e-06	-0.977946566437866	0.191191610777936	5.51238156157819	2.18702261622395	1.89676923607865	2.14854063729444	2.13701323710455	2.00475093832596	0.477683401700586	0.468221678529888	0.6419705192192	1.14574314544246	0.977067640746549	2.07481933300551	0.742137277127737
"ENSRNOG00000002721"	"Ndufb4"	"ENSRNOT00000003674.7"	3.14381327869132e-07	8.51105843494889e-06	1.31944398899464	0.2579752260189	6.72092171536478	77.1152283403551	105.639155194056	75.6915388469097	70.7487988037271	64.3745836609884	301.873240507718	358.876766521174	327.011504518189	231.324391375482	115.113268721155	78.7138609692073	266.839834328744
"ENSRNOG00000013493"	"Psma4"	"ENSRNOT00000093116.1"	3.1518887707461e-07	8.52127964118357e-06	-3.70065457013814	0.723613591933079	1.84033357766027	0.60771671691796	0.423581148389531	0.630606271390102	1.32876908606184	0.955329372873249	0	0	0	0.0525969712849154	0.0250969332373493	0.789200519126536	0.0155387809044529
"ENSRNOG00000010921"	"Taf1d"	"ENSRNOT00000078161.1"	3.17368990421606e-07	8.56853035856261e-06	-3.46978134292579	0.678642119281333	2.35315885872417	2.40538056072129	4.73902053450665	3.43267712014212	1.16497104339089	1.76244171374619	0.28433760775061	0	0	0.0584807533336298	0.162040257332957	2.70089819450143	0.100971723683439
"ENSRNOG00000002280"	"Sh3bgrl"	"ENSRNOT00000042827.5"	3.1948546127365e-07	8.61393657967336e-06	1.39719275631627	0.273339039843163	6.53080461336251	146.386583816161	155.827778530019	119.40999823323	84.4458032546065	61.5409672322322	485.923383732516	524.095237218399	305.437386147241	276.396272514744	285.394644080833	113.52222621325	375.449384738747
"ENSRNOG00000012828"	"Emg1"	"ENSRNOT00000017334.5"	3.22123263153298e-07	8.67325639389796e-06	0.859108387817756	0.168122286235211	6.33502816231026	9.79079010685708	10.2907192148235	9.98445415648678	10.810346747343	11.3791280725711	22.8091566612674	20.1048498471992	19.6510903174782	26.4016447711973	21.1364381343842	10.4510876596163	22.0206359463053
"ENSRNOG00000014476"	"Evl"	"ENSRNOT00000080230.1"	3.24897604695195e-07	8.73608661091545e-06	0.980007761130624	0.191842394079132	6.22407892070451	10.9065608819549	9.8883715971231	10.3115188492117	13.0254628585431	8.29571643553911	27.0223407842194	30.6448152951675	29.0326725555962	29.9834911789341	12.3428141684825	10.4855261244744	25.8052267964799
"ENSRNOG00000000288"	"Scarf2"	"ENSRNOT00000000313.7"	3.27995845619283e-07	8.80744400086359e-06	1.66704443162213	0.326448580542835	4.87229428009944	0.926759300756291	0.455115074057489	0.65729208431396	1.154282630017	1.28719686678939	1.7727354523523	3.55334986025114	3.24363093688748	5.88751406882667	8.30208323053347	0.896129191186826	4.55186270977021
"ENSRNOG00000010765"	"Vcl"	"ENSRNOT00000085126.1"	3.33804854288819e-07	8.95130013185591e-06	-3.92137382018414	0.76840164282888	1.64284533068089	0.399267160821681	1.16847207466188	0.559194131993824	0.247411192776554	0.386573866473882	0	0	0	0	0.0327231873833658	0.552183685345564	0.00654463747667316
"ENSRNOG00000031802"	"LOC691427"	"ENSRNOT00000051411.4"	3.3621453603751e-07	9.00373440629099e-06	1.7683937323267	0.346612983780865	7.12761599380308	429.729692927382	484.058342686126	384.339007191154	1919.07658870549	1667.78481834754	1990.6778501005	1941.99354346341	1821.0919829909	12097.9765518835	4367.58327593033	976.997689971538	4443.86464087373
"ENSRNOG00000040384"	"Mir770"	"ENSRNOT00000062137.1"	3.38313774820303e-07	9.04772479839938e-06	-3.53846131901346	0.693714201110867	1.44508742829988	20.7937249581135	24.5834994333976	29.6029249395751	27.8949293497795	57.2261801822235	0	0	0	0	2.68033130101708	32.0202517726178	0.536066260203416
"ENSRNOG00000017372"	"Higd2a"	"ENSRNOT00000023515.6"	3.4021485891698e-07	9.08630439239594e-06	1.27943876675998	0.250885723516104	6.09759469940663	23.0130246525629	20.2938008785552	17.1938198351855	39.3631773128896	42.2955528541427	67.0305607599284	63.4843703039265	69.1792222210739	180.397669723652	75.860147236196	28.4318751066672	91.1903940489554
"ENSRNOG00000058306"	"AABR07060318.1"	"ENSRNOT00000086478.1"	3.40871806222293e-07	9.09159701737171e-06	-3.23572097333083	0.634539418601415	0.924713306105472	0.313428738516912	0.19465328172514	0.331916215142571	0.577705704701282	0.910260109515844	0	0	0	0	0	0.46559280992035	0
"ENSRNOG00000022432"	"Tmem59l"	"ENSRNOT00000082319.1"	3.43259474543602e-07	9.14297447181528e-06	-4.29898736805296	0.843269270804062	2.24883514608375	3.88749455454881	0.96271104312702	5.07250849324299	3.18771737812059	3.80373844845472	0	0	0	0.832561775438338	0	3.38283398349883	0.166512355087668
"ENSRNOG00000002506"	"Cdkl2"	"ENSRNOT00000079304.1"	3.46257742630478e-07	9.2104559539707e-06	0.836781214518745	0.164192135704276	7.1524544239151	11.9958472538006	11.2577157504076	9.7890870362726	12.6099914123999	10.5181773976783	17.5314625008944	24.3270298166705	23.612501992648	30.3530475700332	21.1480158806259	11.2341637701118	23.3944115521744
"ENSRNOG00000038883"	"LOC294154"	"ENSRNOT00000059426.4"	3.47442605740157e-07	9.22958460851566e-06	1.28949294079423	0.253054778196301	7.47950029259256	10.5292028952906	10.843741659842	11.9215670087579	17.807714093476	21.2905165490645	27.2378217985513	31.2692691813152	41.2263905912418	71.6486905477034	72.6243596490449	14.4785484412862	48.8013063535713
"ENSRNOG00000002618"	"Ivns1abp"	"ENSRNOT00000081269.1"	3.50782931935409e-07	9.3058438583186e-06	-3.66041866404202	0.71858948395969	2.47548736461116	7.51345002231622	4.15417220904602	4.90598718013053	6.49240679648712	4.29165378707768	0	0.336605028319282	0	0.245990792163525	0.233695462560542	5.47153399901151	0.16325825660867
"ENSRNOG00000021725"	"Mlec"	"ENSRNOT00000038395.4"	3.54226099902617e-07	9.38462382589594e-06	0.861042539127357	0.169095699267015	6.25638986180521	11.9045318046179	11.3077026332768	11.7666769938324	8.30459462405497	7.96573570285007	22.8918301696866	30.9420070744008	19.7905999565605	19.5577341000749	15.6651428901816	10.2498483517264	21.7694628381809
"ENSRNOG00000019365"	"Ablim3"	"ENSRNOT00000080365.1"	3.55526987253051e-07	9.40651309264848e-06	1.06033906067547	0.208262935346601	5.58675234055668	2.63378709018003	3.70466371151132	3.56250074703387	2.42300030728864	5.87835999293873	5.78413653610525	8.92743300443017	7.69232212386862	10.7013838621464	13.1272802874153	3.64046236979052	9.24651116279315
"ENSRNOG00000015844"	"Snrpd2"	"ENSRNOT00000021221.4"	3.66619722362703e-07	9.68707071741558e-06	1.14908436600623	0.225952176157877	6.54243753539264	23.5079833859005	22.638555710989	18.6441205836155	25.1635166943534	37.3718685653279	48.1457996899439	51.4252218447131	48.6070136984624	121.033973064778	106.858123544077	25.4652089880373	75.2140263683949
"ENSRNOG00000051420"	"Cables2"	"ENSRNOT00000084452.1"	3.73723375736291e-07	9.86161935681236e-06	0.968681778063479	0.190614959086477	5.43805668874169	5.13782200712972	5.05912717280674	4.94677817146544	6.0866226559221	5.22346903213647	11.7006624599964	9.9832921882695	16.2965753466792	16.4086111439836	9.1738326107349	5.29076380789209	12.7125947499327
"ENSRNOG00000009378"	"Rpl4"	"ENSRNOT00000013461.7"	3.75050449112422e-07	9.88347706125116e-06	1.24560794924286	0.245140324116822	8.37681063172577	123.828826936463	128.021332704203	107.057748734952	61.196421392254	59.9428121924122	381.671335002824	432.369632676864	298.622013236189	179.688662009771	194.498488071446	96.0094283920568	297.370026199419
"ENSRNOG00000002618"	"Ivns1abp"	"ENSRNOT00000080481.1"	3.77466986939269e-07	9.93394857925033e-06	-3.21850332496956	0.633565662763497	0.916104481924837	1.13546631964706	2.47148906589151	1.63379868614965	1.50967009071102	2.50268045174693	0	0	0	0	0	1.85062092282923	0
"ENSRNOG00000051014"	"AABR07016418.1"	"ENSRNOT00000071355.1"	3.85179800795916e-07	1.01234855601759e-05	-2.52961001493869	0.498333395167485	4.55965369225793	65.2758722186569	52.7061395973362	77.2596449625369	124.615544259818	134.676507339012	4.29779616179157	6.51156311275193	0.816345453098276	11.9215270500334	19.0238849447244	90.906741675472	8.51422334447992
"ENSRNOG00000032034"	"Supt5h"	"ENSRNOT00000093383.1"	3.92811838189551e-07	1.031040026146e-05	-1.62802688650048	0.320957363240719	4.31318535608756	2.83416367191006	2.29115330627909	2.40655244647776	4.76476272446712	5.47922683136035	1.25058845008908	0.54149134454815	0.605116891550744	0.237522280113305	0.633623156285989	3.55517179609888	0.653668424517454
"ENSRNOG00000051495"	"AABR07010986.1"	"ENSRNOT00000082520.1"	4.17612366458676e-07	1.09468574948566e-05	-3.26669893521655	0.645497107708721	0.94020228704833	0.854025873008792	0.583239017635307	0.927174934223578	0.89668709940116	0.44373078944912	0	0	0	0	0	0.740971542743591	0
"ENSRNOG00000020386"	"Ash1l"	"ENSRNOT00000027629.7"	4.18326645946055e-07	1.09510953008097e-05	0.842669319334629	0.166521507021051	7.51735374339686	6.26567338410468	7.27719383838275	6.00277434380281	5.84127658423489	4.96869007072809	11.3018073603641	12.2414600468048	12.7955299936358	13.390035918772	12.8359952838856	6.07112164425064	12.5129657206925
"ENSRNOG00000019634"	"Eif4e2"	"ENSRNOT00000085476.1"	4.23752277881126e-07	1.10784945788526e-05	-3.66923911261957	0.725437698848103	1.14147237574984	1.10681066243959	0.929447831904931	1.27743446552205	1.45888803821684	0.65728729384744	0	0	0	0	0	1.08597365838617	0
"ENSRNOG00000032177"	"LOC499843"	"ENSRNOT00000040741.1"	4.2621174212644e-07	1.11281134304607e-05	-1.90324548609471	0.376368890415364	4.62151196201997	19.72200908166	18.2379988805134	25.992575634127	16.4757099307318	17.2287693632827	0.719177938736139	2.07660915723455	5.82552280202911	2.22229242034143	4.91636312597606	19.531412578063	3.15199308886346
"ENSRNOG00000053968"	"AABR07019086.1"	"ENSRNOT00000088122.1"	4.27700200475955e-07	1.11522827274105e-05	-1.65337929831757	0.327000588763794	6.12071329721042	8.25151079112031	8.3914425596469	9.7638882582488	24.0827418210452	20.5752428876431	1.7924372630481	1.06450916175462	2.03711481176795	3.43430725006358	3.57908119225402	14.2129652635409	2.38148993577765
"ENSRNOG00000002838"	"Pdzd11"	"ENSRNOT00000076824.2"	4.30914853337391e-07	1.12213398798779e-05	-3.19430454215553	0.631938935031133	0.904005090517821	0.953402921994707	1.75912514323631	0.837405471179307	1.10236233628097	0.948899392290915	0	0	0	0	0	1.12023905299644	0
"ENSRNOG00000032739"	"Da2-19"	"ENSRNOT00000045976.2"	4.34837855995106e-07	1.13086375226444e-05	-3.50434782083405	0.693513086131355	1.42803067921017	1.4964908663216	1.07430776214153	1.24297051530083	1.22791450871788	1.57472224644043	0	0	0	0	0.134881230142197	1.32328117978445	0.0269762460284394
"ENSRNOG00000018168"	"Klc4"	"ENSRNOT00000031625.3"	4.37922812487974e-07	1.13739402032427e-05	1.50079648028945	0.297088123060249	5.29919552503524	2.52723227530767	2.06759338517324	3.04489094834396	0.655705012238518	2.02925596157685	7.51107492379846	10.8548816499479	7.79760683543006	4.53371760224608	7.61708839180999	2.06493551652805	7.6628738806465
"ENSRNOG00000008602"	"Steap4"	"ENSRNOT00000048061.4"	4.39094995881577e-07	1.13894575044309e-05	-3.47473560498815	0.687906070367285	1.30393784524005	1.03298684785654	0.974474362478786	0.509789717349688	0.716937241851188	0.844492275249285	0	0	0	0	0.0466854293155344	0.815736088957098	0.00933708586310688
"ENSRNOG00000005715"	"Lgr4"	"ENSRNOT00000007681.4"	4.40682773552626e-07	1.1415700030709e-05	-1.04727307410643	0.207360768320769	6.25616321897413	17.7247256723677	17.9236806669742	13.6974391725416	9.27649742010675	7.1500530379084	4.42115654606652	4.02175250825263	3.93451439031588	2.56888570193758	4.76280624121365	13.1544791939797	3.94182307755725
"ENSRNOG00000033796"	"Kcnj5"	"ENSRNOT00000041038.5"	4.47091190721614e-07	1.1566587632546e-05	-2.64965685465873	0.524920516169981	3.34290168752369	0.763270879930196	0.851276207017732	1.05121869874399	1.36572735704953	1.47640518548366	0.0505117366647729	0.0408136829413957	0.0807843588846805	0.0775835424028159	0.0757631385767724	1.10157966564502	0.0650912918940875
"ENSRNOG00000046021"	"LOC108348172"	"ENSRNOT00000075774.2"	4.48584435590491e-07	1.15900883443243e-05	2.1127453243754	0.418606428615145	7.68806924044972	27.6148660807525	34.4544492411621	23.385548874307	120.991002518305	89.7149739757819	193.974854042799	245.574196858114	233.718840103718	681.460244465881	657.322500083609	59.2321681380617	402.410127110824
"ENSRNOG00000001608"	"Nxpe3"	"ENSRNOT00000002188.5"	4.50593444294412e-07	1.16241647459958e-05	-4.63656943739566	0.918816987310771	2.54072084953259	2.34238648401116	2.3003220095994	2.11165366407136	1.97608070818291	1.52240496715899	0	0.692641759871741	0	0	0	2.05056956660476	0.138528351974348
"ENSRNOG00000005668"	"Ndufa8"	"ENSRNOT00000084069.1"	4.51076484315022e-07	1.16241647459958e-05	0.859425291645051	0.170317002692496	6.66031850250982	34.0183994546714	42.6962433828422	38.4780468924532	30.0419199742378	31.5283828102021	77.3821257821436	54.6356823202845	121.461923862522	54.79256855023	73.1570852277726	35.3525985028813	76.2858771485905
"ENSRNOG00000007769"	"March2"	"ENSRNOT00000010399.7"	4.53802342177384e-07	1.16792220973107e-05	1.23120382840076	0.244050095019743	6.28633753451848	14.4831425473899	15.7293666658552	11.9149520206832	7.58084155546788	6.26249055584346	38.8203970923297	47.0137018509217	33.6832979952182	29.996784946827	18.145078181923	11.1941586690479	33.5318520134439
"ENSRNOG00000049523"	"AC097153.2"	"ENSRNOT00000074021.2"	4.5537654197661e-07	1.17045355802211e-05	-3.17709019388358	0.629847740407347	0.895397916381842	1.96390259289334	2.11168632066251	1.58541808649837	1.04323020339069	1.91064137359769	0	0	0	0	0	1.72297571540852	0
"ENSRNOG00000011280"	"Mllt3"	"ENSRNOT00000015094.6"	4.56103698073692e-07	1.17080401356559e-05	0.831712383167242	0.164894234397571	6.67287338473315	11.580771899921	11.5000068619118	13.6532495821629	9.57555957578979	8.36832563523579	21.2346799832035	21.7757476838865	27.3318945469354	20.913164578127	19.6773335263586	10.9355827110043	22.1865640637022
"ENSRNOG00000029510"	"Plxnb1"	"ENSRNOT00000043345.5"	4.60562223425277e-07	1.18071948015766e-05	-1.03662706462874	0.205596200706814	5.44702477803544	3.15795908685545	4.00766961998264	2.58795638743067	2.48283965943544	1.99047276438638	0.937394888260589	1.50368142037574	0.729465336965617	0.939410060136755	0.524315716927925	2.84537950361812	0.926853484533325
"ENSRNOG00000001172"	"Rnf10"	"ENSRNOT00000064910.2"	4.6243910327066e-07	1.18399944567373e-05	1.46971985669075	0.291537300745473	7.80406466442946	9.47830952836755	10.8750416252653	10.459850851648	19.1705802563495	25.7367823082674	31.5402083892831	45.6637022449738	40.92958716756	90.1542766598472	87.5353816569484	15.1441129139796	59.1646312237225
"ENSRNOG00000001316"	"Anapc5"	"ENSRNOT00000001794.7"	4.70771882583617e-07	1.20377888995607e-05	0.871769076612155	0.173043617980078	8.16496760152696	58.1375298534901	53.2625017742513	52.1194914355256	38.5561779495643	37.6217382119458	117.751661773336	106.946412745768	104.392670006888	111.405313280527	69.5553366793837	47.9394878449554	102.010278897181
"ENSRNOG00000039994"	"Upf3b"	"ENSRNOT00000092703.1"	4.78093126314392e-07	1.22092416033148e-05	-3.16891873738671	0.629390339409172	0.891312188133409	0.823879790546783	0.719938505876195	0.745185154431111	1.14368163780717	1.03019429257369	0	0	0	0	0	0.89257587624699	0
"ENSRNOG00000056037"	"AABR07034636.1"	"ENSRNOT00000083950.1"	4.81074064420086e-07	1.22695556430024e-05	-3.20791251974468	0.637285760630252	0.910809079312397	0.246145089917656	0.233059615640163	0.205020115240193	0.162723435905239	0.24348876271314	0	0	0	0	0	0.218087403883278	0
"ENSRNOG00000019671"	"Rsbn1"	"ENSRNOT00000026631.6"	4.83216651239853e-07	1.23083603825452e-05	-0.889599779572418	0.176758309142977	5.92576142327358	4.6890244707912	4.02952196326258	4.66372549037368	4.25775843120812	3.24968445170713	1.63966693326254	1.14309539880798	2.07019098145359	1.24720760594283	1.65446520354193	4.17794296146854	1.55092522460177
"ENSRNOG00000010420"	"Sem1"	"ENSRNOT00000013841.3"	4.85087299175623e-07	1.23401476351262e-05	1.00429369376016	0.199576687164029	5.23759033725499	9.5565688322089	8.43726035616261	11.2418260844582	9.00785739246977	9.39791655179583	30.6240520245768	21.6300058183861	26.4733299878686	19.8983742108424	17.4883173877356	9.52828584341906	23.2228158858819
"ENSRNOG00000058971"	"SNORD113"	"ENSRNOT00000087284.1"	4.87006256180102e-07	1.23730807419501e-05	-3.64269348215945	0.7239974185981	1.70435502740495	58.3367864536558	46.4037570792217	54.5401901236968	30.4994161949509	19.1333434190425	0	0	0	2.15405187745413	1.8126350393546	41.7826986541135	0.793337383361746
"ENSRNOG00000051892"	"AABR07072945.1"	"ENSRNOT00000090476.1"	4.89281856884199e-07	1.24149789473421e-05	-3.45354920146791	0.6865263057066	2.46060475782131	10.2304864552442	8.21612740086695	11.2529127724422	20.2242275706726	20.5981508434493	0	0.252635602644893	0.82335130309524	0	2.37743166783186	14.1043810085351	0.690683714714399
"ENSRNOG00000015865"	"Ap2s1"	"ENSRNOT00000021310.5"	4.96438445895566e-07	1.25804612305786e-05	1.00543379557278	0.199979503110161	7.13712365378521	36.8072015565311	38.4685456531651	41.3462991295318	75.4355225906375	66.316100968658	99.1161365643996	95.476970093862	111.751728034538	204.981062436075	109.466438671015	51.6747339797047	124.158467159978
"ENSRNOG00000038202"	"Calml4"	"ENSRNOT00000009716.5"	4.97494624589814e-07	1.25911251283478e-05	0.952109725530576	0.189388770227567	5.47037672918215	9.52250646712294	11.7342664745168	10.538548066542	7.86252771124236	9.65974360197046	27.0632676381988	29.0870985182109	21.6466466496188	21.6752968576141	15.1251128892015	9.86351846427891	22.9194845105688
"ENSRNOG00000014909"	"Sh2d5"	"ENSRNOT00000076439.2"	5.01638738777833e-07	1.26798149060718e-05	1.23531951364039	0.245801222344086	5.31193783453368	2.26121856694313	2.19175274933819	2.96131331270972	0.922854501788007	1.19966220395266	5.17883836440469	4.79140360934805	5.98226050343123	3.79324585475444	7.91118222751342	1.90736026694634	5.53138611189037
"ENSRNOG00000000519"	"Stk38"	"ENSRNOT00000092701.1"	5.03143351369067e-07	1.27016455975552e-05	-3.48316889217799	0.693152727927837	1.32366249148718	2.77739145308181	2.15318159653028	2.52302069592851	4.3562733008543	5.46700372540009	0	0	0	0.210066971300619	0	3.455374154359	0.0420133942601238
"ENSRNOG00000060123"	"Kifc2"	"ENSRNOT00000085152.2"	5.13181818926359e-07	1.29385802871039e-05	1.33582997231911	0.266031754653069	7.38672600398399	8.08749161611232	9.13723394280143	10.6232294664929	20.6685582501326	22.0870101925539	28.9995396780633	34.7582245886951	46.1321183306774	72.6403376929412	47.3435395857269	14.1207046936186	45.9747519752208
"ENSRNOG00000055687"	"AABR07035273.1"	"ENSRNOT00000083249.1"	5.18333409799596e-07	1.30518591893248e-05	-1.21412806488081	0.241887130661582	4.72085821992457	1.3289415667767	1.53440260634227	1.52057228386381	2.49253073375291	2.71622672994208	0.35635356874734	0.419015451834133	0.43385626015823	0.691063613788198	0.592544745394425	1.91853478413555	0.498566727984465
"ENSRNOG00000016443"	"Vps13d"	"ENSRNOT00000085291.1"	5.20153763758775e-07	1.30810750462026e-05	-0.875921852324004	0.174530730900832	6.82902750399801	5.42270711316448	5.4148333209651	5.3214208185788	5.0725692319726	3.96188641801035	1.2879421739247	2.22108102239799	1.30088499808407	2.66796094443576	2.24121276175549	5.03868338053827	1.9438163801196
"ENSRNOG00000055488"	"AABR07017200.1"	"ENSRNOT00000077112.1"	5.28193269452714e-07	1.32664208120969e-05	-1.78021910680098	0.354923833309775	4.70905198956502	17.3465007109364	16.629833269776	22.34843422602	27.6537111348396	29.9326066292524	0.903072603175177	3.57519531002201	4.5402451995811	3.32078115586781	7.26958030333281	22.7822171941649	3.92177491439578
"ENSRNOG00000015642"	"Pabpc4"	"ENSRNOT00000056592.3"	5.32015828596339e-07	1.33295071927227e-05	1.46423137963958	0.292005799758877	6.86802049961831	7.18407175889783	6.45986341711153	6.29712000217005	12.9081232438945	14.616494591049	19.169566546224	30.2808946489819	23.8731671307044	55.8236023240136	60.3144380812176	9.49313460262458	37.8923337462283
"ENSRNOG00000055331"	"Ints10"	"ENSRNOT00000091335.1"	5.32050269437536e-07	1.33295071927227e-05	-1.18384328204964	0.236089710495913	5.38634197443539	5.69308955059059	7.12684694602363	7.94097365187043	7.72703145236978	9.13729780046011	1.44676103675494	2.23822237261411	3.04458454610328	1.00751459274097	3.37463910268792	7.52504788026291	2.22234433018024
"ENSRNOG00000020930"	"Atxn7l3"	"ENSRNOT00000028407.7"	5.33261851707065e-07	1.33429925697966e-05	0.846517232262911	0.168832687763628	6.25618382606656	15.0220699003139	14.890335679104	14.7279658936288	14.0194430078627	13.2561796545868	27.2427719073202	27.8475895877088	28.1511234359831	39.5079072092597	27.2913082780212	14.3831988270992	30.0081400836586
"ENSRNOG00000005116"	"LOC108353446"	"ENSRNOT00000006859.5"	5.34153841512117e-07	1.33484573483551e-05	2.55760501813481	0.510131389529874	6.63797593597497	23.3975972766712	34.001459734153	23.5471911208496	4.47822990718195	5.21109760010011	225.582171509954	282.564043951452	203.61850297109	67.6255093579879	96.1814850865584	18.1271151277912	175.114342575408
"ENSRNOG00000057880"	"Myh11"	"ENSRNOT00000087567.1"	5.44315695978238e-07	1.3585269706802e-05	-3.69086475935891	0.736700350374879	1.15228519911951	0.447642145468342	0.645826683476912	0.182939218852318	0.0341608237974259	0.0329842710136702	0	0	0	0	0	0.268710628521734	0
"ENSRNOG00000042668"	"Msrb3"	"ENSRNOT00000064251.3"	5.4607798338987e-07	1.36121099331284e-05	1.69081737319931	0.337530775338258	5.40613829044296	2.11367060403398	1.77285732562907	1.29941590992934	0.951515477987028	0.638092115778692	10.002472296274	12.7113212309453	5.1224815861344	3.46095743467279	3.53554770755836	1.35511028667162	6.96655605111697
"ENSRNOG00000010643"	"Kank2"	"ENSRNOT00000045488.4"	5.53226850783544e-07	1.37729855552481e-05	1.80284819039706	0.360075000725137	5.47205332704356	1.46767762807598	1.20073934887448	1.10657473200601	0.680911194998635	0.450774600764519	8.28847380066208	11.2233689884685	4.34443371343929	2.9929645174412	2.34575589372121	0.981335500943925	5.83899938274646
"ENSRNOG00000056772"	"Col4a6"	"ENSRNOT00000079180.1"	5.56217519251545e-07	1.38300659711516e-05	-1.64274581244775	0.328166502311571	4.16368803691811	2.39704025734416	2.72251617640626	1.62027189521501	1.02007863223231	0.558007183067521	0.308495686472502	0.316394216405752	0.315807326958043	0.138960781719807	0.199110637649546	1.66358282885305	0.25575372984113
"ENSRNOG00000060464"	"Plxna3"	"ENSRNOT00000083148.1"	5.58625774518528e-07	1.38725400672101e-05	-0.84947875804856	0.169726089480082	6.31791536775797	4.78757464584063	4.41917624220164	4.66434991247851	6.68384387530387	7.50040863410922	1.49828557963606	2.76481644526701	1.7224688637057	2.14461554360806	2.60234585325436	5.61107066198677	2.14650645709424
"ENSRNOG00000058202"	"Ppp2r2c"	"ENSRNOT00000088469.1"	5.60991220153067e-07	1.39138460698039e-05	0.834147645707877	0.166690039262136	6.6278654653457	30.1062738614527	31.6183913642475	34.1528526113482	30.1408203725345	26.1025588353544	63.332342923281	70.1379443013131	71.3496535246301	71.7886323081594	38.8936840876404	30.4241794089875	63.1004514290048
"ENSRNOG00000008298"	"Dock7"	"ENSRNOT00000065112.2"	5.6941074158236e-07	1.4105015832422e-05	-3.61026580811213	0.721863548196996	1.71305344477006	0.892100031824064	0.952132074827175	0.857263891122575	1.77814032838822	1.77763674091449	0	0	0	0	0.308362330277159	1.2514546134153	0.0616724660554318
"ENSRNOG00000028982"	"Mrgprb3"	"ENSRNOT00000051589.3"	5.75104530789654e-07	1.4228272767364e-05	-3.89329955731315	0.778754126763348	2.65998832125323	0.532317192350185	0.586599187936003	0.896828574830722	3.52476961115337	4.35694652079064	0.0170901801434257	0	0	0.0806268077158729	0.113958256242099	1.97949221741218	0.0423350488202795
"ENSRNOG00000061122"	"LOC102551683"	"ENSRNOT00000091253.1"	5.77379033333319e-07	1.4266733545594e-05	-3.6355738057699	0.727313476349937	1.12463972232501	0.28675187103191	0.327849726138931	0.469875669374435	1.00320458423164	2.6235992195279	0	0	0	0	0	0.942256214060963	0
"ENSRNOG00000014208"	"Dctn3"	"ENSRNOT00000019561.5"	5.80112227980025e-07	1.43164184581322e-05	0.859499274320867	0.171978172369562	6.07671605124776	16.4387481677627	13.5269775011119	15.6580886178032	18.9095353023101	23.7011917648435	34.171875652344	29.3688274341821	45.5704624625348	39.518711150922	33.978668041735	17.6469082707663	36.5217089483436
"ENSRNOG00000019207"	"Shank1"	"ENSRNOT00000044257.5"	5.86824728840623e-07	1.44640617555157e-05	1.60017570747899	0.320323210968014	4.42863476740736	0.261164079936827	0.313317305484619	0.645675011631716	0.133256781311095	0.219888085350977	1.36013737803764	0.812248380525537	2.16522525434587	1.13070864227006	1.02496409201726	0.314660252743047	1.29865674943927
"ENSRNOG00000061662"	"RF00045"	"ENSRNOT00000084684.1"	5.91265452059451e-07	1.45554129980896e-05	0.84282075684004	0.168765033057154	6.65581215897131	582.857367176078	377.404024495545	685.678601520488	688.370040320557	521.458722816542	812.654678451686	586.408910594597	723.541466616428	1921.8894701363	1445.189452398	571.153751265842	1097.9367956394
"ENSRNOG00000004623"	"Rag2"	"ENSRNOT00000006097.5"	5.93113301517947e-07	1.45827869679667e-05	-3.57742373230497	0.716423814048387	2.61231461289371	0.636112247344515	0.789965248829282	0.912681882443035	1.99616007687604	1.94541940148314	0	0	0.0277143360155415	0.178353374757108	0.0661351230776135	1.2560677713952	0.0544405667700526
"ENSRNOG00000056612"	"Unc13c"	"ENSRNOT00000080662.1"	5.95919663427172e-07	1.46155197650201e-05	2.24723274793516	0.450118592998498	4.47011155135111	0.266966317464746	0.0868187395912662	0.582407015098431	0.120628727232973	0.126266300001896	1.00571848462564	0.625686012728143	2.98123598650127	2.33538112419322	2.21421276426237	0.236617419877862	1.83244687446213
"ENSRNOG00000051522"	"AABR07044011.1"	"ENSRNOT00000079674.1"	5.95497694530927e-07	1.46155197650201e-05	-3.16363344108803	0.633655426557635	0.888669539984067	0.359998795191249	0.488687082606915	0.113967563704998	0.566526100727545	0.569802081787997	0	0	0	0	0	0.419796324803741	0
"ENSRNOG00000061976"	"AABR07029970.1"	"ENSRNOT00000092405.1"	5.986279267082e-07	1.46637943431105e-05	-3.69666084871141	0.740567545689215	2.0798337650655	0.817294688413499	0.921088665638563	1.6227809372105	4.28945674716851	4.23389750934991	0	0	0.0768748811738564	0.0506852250396669	0.0547495781625672	2.3769037095562	0.0364619368752181
"ENSRNOG00000030210"	"Fndc1"	"ENSRNOT00000089458.1"	6.00014668715398e-07	1.46710960065212e-05	-3.75497654378376	0.752317519061626	1.77934824280781	0.591675836490325	0.325865259794825	0.266302688305467	0.164044250363973	0.243483599096194	0	0	0	0.0612112515409849	0	0.318274326810157	0.012242250308197
"ENSRNOG00000021177"	"Cox8a"	"ENSRNOT00000028754.5"	6.00406664040406e-07	1.46710960065212e-05	1.48250548613072	0.29703062631526	6.63536489953281	40.0651267760009	40.6392160193057	37.6676788677206	72.431133108199	130.554830755419	139.221443476364	154.202428817386	154.392227482789	396.393725239837	346.226718905622	64.2715971053291	238.0873087844
"ENSRNOG00000000923"	"Cct6a"	"ENSRNOT00000093591.1"	6.04861896009102e-07	1.47617588586359e-05	-3.45522566380272	0.692477411335569	1.2993479892709	1.67683835166439	1.13348194961282	2.4646377273877	0.877349733202669	0.952568072624033	0	0	0	0	0.082353153897267	1.42097516689832	0.0164706307794534
"ENSRNOG00000047106"	"Mtrf1"	"ENSRNOT00000072969.3"	6.13390473252045e-07	1.4951487095247e-05	1.06759343157725	0.214077308788871	4.97574817356546	3.44322351334046	3.00331553228125	3.15594769523912	1.94840793813662	1.7366326741076	10.0194291483196	5.97701295502515	7.58830930699733	6.04498831281248	4.6996081333793	2.65750547062101	6.86586957130677
"ENSRNOG00000059185"	"RF00004"	"ENSRNOT00000078501.1"	6.15681538054211e-07	1.49888956260692e-05	-3.11489220903444	0.624698590381993	0.864298923957276	13.2794563550293	14.5550680974862	29.5582860263945	9.33124115132318	14.9331225266591	0	0	0	0	0	16.3314348313785	0
"ENSRNOG00000055234"	"LOC102555534"	"ENSRNOT00000079740.1"	6.24298044641301e-07	1.51800176081677e-05	-3.1485175558289	0.631782715231647	0.881111597354507	0.190620911915633	0.295776421067193	0.229878523240459	0.291192572474158	0.125625101350392	0	0	0	0	0	0.226618706009567	0
"ENSRNOG00000013828"	"Sirt3"	"ENSRNOT00000018861.6"	6.28036683730561e-07	1.52522095116281e-05	0.906692923408779	0.18197951368714	5.70979517917828	7.68012838939026	8.28504567100147	7.63757966478491	7.80863973202687	6.2191049740222	14.1524484513334	18.5351563458213	18.6578178008846	20.6732147590512	11.9328147164299	7.52609968624514	16.7902904147041
"ENSRNOG00000043814"	"AC111867.1"	"ENSRNOT00000069081.1"	6.30596184314681e-07	1.52956237265166e-05	-3.13214732959418	0.628742829190306	0.872926484237146	15.0864762670282	5.15837734231998	19.3082100856963	18.4228001962686	27.8448055889576	0	0	0	0	0	17.1641338960541	0
"ENSRNOG00000051339"	"AABR07039328.3"	"ENSRNOT00000076603.1"	6.3743174927466e-07	1.5442524419775e-05	-1.84855942566051	0.371232681666737	4.38174970156878	10.5913082638136	10.9992287883158	12.3857616288205	33.4470346098865	29.3484047666954	1.68767684591568	1.74790678443168	1.10175276221743	3.28199710346285	6.14486655365335	19.3543476115064	2.7928400099362
"ENSRNOG00000002983"	"Nf1x"	"ENSRNOT00000039354.4"	6.43910640155703e-07	1.558043608787e-05	1.50707483080902	0.302773858744467	6.83522658679947	10.643899418007	10.1867087809172	12.8780060316145	30.2966245333206	28.6414408025976	46.2689096534983	57.9025732585342	44.8170851739486	117.108947841631	88.6111636482936	18.5293359132914	70.9417359151811
"ENSRNOG00000019097"	"Bap1"	"ENSRNOT00000025853.5"	6.45307110645452e-07	1.55951841605621e-05	0.831113286078859	0.166986124013623	7.7060340611584	19.4295105524662	18.4960439600262	18.3473866155516	18.0713018338954	21.5764171242376	33.756297667622	35.5078083739605	37.8959096933412	53.9472539938559	37.582716380345	19.1841320172354	39.7379972218249
"ENSRNOG00000058094"	"AABR07028902.1"	"ENSRNOT00000077767.1"	6.47308469789755e-07	1.56244968889447e-05	-0.822519577253697	0.165279400692038	6.76895146835858	7.07694089874214	6.43901364691906	8.13070380206884	6.62436779529278	6.07323465782927	1.9566852923964	2.36601726284352	2.75009413701718	3.21773268541216	3.36133556797031	6.86885216017042	2.73037298912791
"ENSRNOG00000020970"	"Rundc3a"	"ENSRNOT00000028487.3"	6.52361871437133e-07	1.57273177691845e-05	0.829816448590024	0.166796136032569	7.68582829411879	33.7039988169914	29.9585215610166	34.7409691462252	37.7300415226386	45.7863500838193	64.4977705461049	62.8319926631473	68.9798824357442	94.0442145470984	80.971987933729	36.3839762261382	74.2651696251648
"ENSRNOG00000028236"	"RGD1309104"	"ENSRNOT00000059807.3"	6.5739431385124e-07	1.58293841039976e-05	1.31248320089233	0.263892886027591	6.86730570895482	12.4990398873661	10.7639772676112	16.7982333622044	19.3075359782209	22.2474992121025	32.0735161588463	34.4155325566227	42.8076670597407	89.5225380494881	89.6599943761207	16.323257141501	57.6958496401637
"ENSRNOG00000045884"	"Gm25994"	"ENSRNOT00000073776.1"	6.59229783222394e-07	1.58543162792696e-05	-3.14104746856551	0.631619614776779	2.71271399301501	208.457237296267	137.737903145637	117.131590940563	81.2290782650815	65.7182939239775	15.2126925402281	2.83832547251789	0	14.0526617483514	1.31268585613617	122.054820714305	6.68327312344671
"ENSRNOG00000010019"	"Fam166a"	"ENSRNOT00000013335.4"	6.61331836924194e-07	1.5885591530093e-05	-3.13112272075376	0.629702012357695	0.872414179816935	0.376587569035625	0.468199859887043	0.370742562409008	0.539805610808819	0.765203901738989	0	0	0	0	0	0.504107900775897	0
"ENSRNOG00000007345"	"Amot"	"ENSRNOT00000049482.4"	6.63013760163558e-07	1.5906711483246e-05	1.46106238118317	0.293864246370698	4.56364344813872	1.0015467215254	0.725326627668204	0.710394220519757	0.509788728895198	0.486780795934724	4.15989003427944	1.53370249335917	1.67193957329739	5.06229077175744	2.06203048129876	0.686767418908657	2.89797067079844
"ENSRNOG00000047513"	"AABR07047789.1"	"ENSRNOT00000090799.1"	6.68397694171535e-07	1.59971462625571e-05	-1.18739154445084	0.238896018524655	6.04072890499211	2.61906878018351	2.57826937541559	2.89283377056991	2.72158890569568	3.51720948880633	0.988326317312166	1.31652202094578	0.327324402130593	0.725407651485636	0.897747952286976	2.8657940641342	0.85106566883223
"ENSRNOG00000060088"	"SNORD113"	"ENSRNOT00000082575.1"	6.67908720480233e-07	1.59971462625571e-05	-3.68392885145301	0.741163112405635	2.07947004149042	254.041912225063	40.8437388934931	110.4850401569	41.3606953160107	23.1282248876776	5.86312550192967	0.00680773391154625	5.08893402786251	0	0	93.9719222958289	2.19177345274075
"ENSRNOG00000019609"	"B4galt2"	"ENSRNOT00000026591.6"	6.75632115168798e-07	1.61507860389627e-05	1.2935376739887	0.260361335156409	7.02278245936262	12.0900798293934	11.4409031000057	10.1664866367313	21.8005906439603	24.441659720995	29.9565467372212	39.714857475372	39.6132155669063	76.4731208458542	74.3469845966837	15.9879439862171	52.0209450444075
"ENSRNOG00000045577"	"AABR07039174.1"	"ENSRNOT00000073116.1"	6.76637617258367e-07	1.61553345315772e-05	-3.13353314098304	0.630749500660258	0.873619389931576	4.79628005795759	7.23867298625321	14.2949777595678	21.6906421104623	23.5754907809675	0	0	0	0	0	14.3192127390417	0
"ENSRNOG00000049822"	"LOC103690064"	"ENSRNOT00000067337.4"	6.80229792084804e-07	1.62215569070332e-05	-3.279163115147	0.660199882561257	0.946434377013555	1.93135736159214	1.57590978402217	0.470191496777681	0.234887777006026	0.402930904208922	0	0	0	0	0	0.923055464721388	0
"ENSRNOG00000051382"	"Ntan1"	"ENSRNOT00000088075.2"	6.86351283273778e-07	1.6347864640188e-05	1.55143962346322	0.312463522852842	6.09254561232448	16.8699578017755	18.4975773297962	18.728297812533	36.8777927951885	39.8384842358428	63.7751380907971	59.6558010870811	83.8648903079215	268.564056587423	116.968529922972	26.1624219950272	118.565683199239
"ENSRNOG00000032635"	"LOC100360117"	"ENSRNOT00000041984.3"	6.88429446207735e-07	1.63776786740681e-05	1.02826179655208	0.207118776221454	6.98166720634107	58.4508157335154	63.7620815655337	57.7222569682398	30.9329793321807	34.82648446145	140.562840679185	168.642091546234	114.676851108014	81.9834519741166	93.5336363035832	49.1389236121839	119.879774322227
"ENSRNOG00000005975"	"LOC100362027"	"ENSRNOT00000057587.2"	7.12591955027416e-07	1.69321759865447e-05	1.81994878334828	0.367080569600239	4.30729881720004	17.2873269677773	5.68722026238961	10.9701235737881	5.82306640535524	8.89365892003664	76.9719955242888	22.644519236741	72.7486951042725	25.9301677892134	66.0101016587069	9.73227922586938	52.8610958626445
"ENSRNOG00000028630"	"Ksr2"	"ENSRNOT00000071074.2"	7.1909365999861e-07	1.70662024672964e-05	2.22189843452143	0.448312760079165	5.56664430904242	0.923528951171832	0.923931927038999	1.00316780259389	2.16393047714435	4.03189764368161	5.94956692892231	10.1272737032101	6.46600013059218	23.3349786461869	31.5675299993402	1.80929136032614	15.4890698816503
"ENSRNOG00000014999"	"Tnpo1"	"ENSRNOT00000020543.7"	7.21017933710843e-07	1.70914023831911e-05	-0.814221859042428	0.164302882473819	7.08321825012913	11.2961369195353	12.7738077804974	10.0551360026122	8.98242948737182	8.79461176119253	4.1195957393775	4.66090459738557	3.78288653720035	3.49456689940005	4.34901087267148	10.3804243902418	4.08139292920699
"ENSRNOG00000032798"	"Slco3a1"	"ENSRNOT00000075893.1"	7.28079746488608e-07	1.72381796131001e-05	-3.79448040827641	0.76598605697377	1.84133782412831	0.679276700712361	0.818439333137881	0.798419375696919	1.50960720955131	1.82466261367951	0.258055395299716	0	0	0	0	1.1260810465556	0.0516110790599432
"ENSRNOG00000036425"	"AABR07010633.1"	"ENSRNOT00000054537.1"	7.30929009618008e-07	1.72849882859189e-05	-3.16852467355652	0.639723417484467	0.891115156218313	17.5864609530663	5.6612969057647	21.313544455276	13.66128327992	11.0719291529476	0	0	0	0	0	13.8589029493949	0
"ENSRNOG00000004608"	"Pam16"	"ENSRNOT00000006314.5"	7.42213603540854e-07	1.75309260802969e-05	0.988471035184829	0.199691951710924	5.2449448429428	15.5396526723538	14.1817383729177	13.7223858495059	17.3928247175231	23.1635900289701	35.5879203197093	28.6957942723242	34.5370902584652	58.5389395424124	40.1681256167615	16.8000383282541	39.5055740019345
"ENSRNOG00000062060"	"AABR07065161.1"	"ENSRNOT00000092368.1"	7.47613431016226e-07	1.76374468600578e-05	-3.60911660605145	0.729325405176431	1.72804486215074	2.00381964126379	4.22700126594314	3.13107547851508	2.51368577772696	2.08300028644981	0	0	0.149705233940148	0.105108639387328	0	2.79171648997976	0.0509627746654952
"ENSRNOG00000053210"	"Zc3h11a"	"ENSRNOT00000090858.1"	7.57723288586877e-07	1.78546996550846e-05	-0.96631063863587	0.195374012397034	5.37970607403369	5.2775464805205	6.46066266659754	7.30725313372027	6.03194415698751	7.94628710035854	1.65326430425528	2.4095989617333	3.51995525369826	1.75192525218966	2.13545034581602	6.60473870763687	2.2940388235385
"ENSRNOG00000052253"	"RF00017"	"ENSRNOT00000090949.1"	7.59637018502856e-07	1.78785353867828e-05	2.01658934507552	0.407765658367956	5.78936349888636	85.3544225724259	62.7387654999385	106.73815783715	23.3574736639142	53.7852760194204	361.715979594032	500.092196370208	555.016123381843	174.369296291575	352.853164437072	66.3948191185698	388.809352014946
"ENSRNOG00000006911"	"Sptb"	"ENSRNOT00000009028.7"	7.61551456707674e-07	1.79023312189513e-05	1.06903638131867	0.216186576420583	6.74095191409831	2.92345806101347	2.87628686644307	3.03428759684186	3.79412325226735	3.6375363958045	4.63779883949236	9.76263285282765	8.3523015984904	16.0233926196379	6.90505100195325	3.25313843447405	9.13623538248031
"ENSRNOG00000010664"	"Wdr73"	"ENSRNOT00000032294.4"	7.64957896087936e-07	1.79611026383586e-05	0.930167427367797	0.188136793253516	5.50204597091229	6.38312716504074	6.55858414192093	5.41238486995426	4.29877929025107	4.78845543571091	8.77713616662239	17.12836886295	15.2141165793158	10.0786059420505	11.7133560050073	5.48826618057558	12.5823167111892
"ENSRNOG00000048320"	"Ndufa11"	"ENSRNOT00000070862.2"	7.68003136260784e-07	1.8011264084355e-05	1.05317562330179	0.21304994000224	6.86900671079022	78.5582859397677	81.0483612978129	90.1264350247106	50.2367842388201	56.2324628324932	241.940510165724	197.108107585036	205.95323038617	155.369497567784	101.614436133823	71.2404658667209	180.397156367707
"ENSRNOG00000016727"	"Akr1a1"	"ENSRNOT00000023072.5"	7.79010152458457e-07	1.82151950892604e-05	0.902312408583989	0.182633861481568	8.6270981404044	153.261356349016	155.341114557281	140.263822697825	179.429917350442	155.861989628361	310.462631543797	316.635445652141	385.463830666626	418.17908266788	291.329147404403	156.831640116585	344.414027586969
"ENSRNOG00000016242"	"Fzd1"	"ENSRNOT00000021979.4"	7.783661663709e-07	1.82151950892604e-05	-0.847751140114581	0.17158470838434	6.17727025792745	9.24446929676582	10.1213726839601	8.19189976888974	6.84587828797681	6.74108385734597	2.71565992710747	3.73691764249896	2.90114619952134	2.92469055787871	3.31697836297569	8.22894077898769	3.11907853799643
"ENSRNOG00000058785"	"LOC103692170"	"ENSRNOT00000082806.1"	7.79456296901287e-07	1.82151950892604e-05	-4.06220187587905	0.822234484179281	2.53997672824948	1.01176600168204	1.63137317231204	1.58933912137695	2.7517679841873	3.96356233526822	0	0	0	0.0649921034882471	0.438091605881559	2.18956172296531	0.100616741873961
"ENSRNOG00000000809"	"Atat1"	"ENSRNOT00000079253.1"	7.92222729540242e-07	1.84917288943451e-05	-3.12697072857757	0.633339561893715	0.87033818372884	0.357747743209928	0.257910273260136	0.468179965859334	0.178586084538677	0.516806990605602	0	0	0	0	0	0.355846211494735	0
"ENSRNOG00000004870"	"Dyrk3"	"ENSRNOT00000087793.1"	7.96254403699156e-07	1.85639688448308e-05	-3.72308503745502	0.754228404268715	1.16839533816757	0.179163493168184	1.06644927131792	0.969820522402915	0.341502104733586	0.290223497856676	0	0	0	0	0	0.569431777895856	0
"ENSRNOG00000047896"	"Kctd10"	"ENSRNOT00000073019.2"	8.03905278579283e-07	1.8720318337962e-05	0.91209213101926	0.184842937602821	6.42965729751219	6.85500961857401	8.18246489191234	6.55527679167497	5.38602621822281	5.71942637620799	17.727547369509	24.1223375076799	14.7302331886666	10.4052504941284	9.27111959276422	6.53964077931842	15.2512976305496
"ENSRNOG00000006995"	"Ano6"	"ENSRNOT00000089895.1"	8.17749197548909e-07	1.90203472392332e-05	0.9601032199511	0.19470432629249	5.39019179580637	2.66383416397618	3.39754910016385	2.54122915200064	1.3402944434522	1.94959886683986	5.47271212417888	4.79521094486179	6.99771281417892	4.45834132748298	5.04790601547452	2.37850114528655	5.35437664523542
"ENSRNOG00000012367"	"Pcdh7"	"ENSRNOT00000049245.5"	8.34205720889929e-07	1.9380369016267e-05	-0.904891166239785	0.183652577349361	5.7058432970546	8.38277928182768	7.76642019375545	7.52036483657075	4.95392069641045	4.56508918921348	1.9828766014395	3.38918832631655	2.427930657591	1.56200802558626	2.61946735586761	6.63771483955556	2.39629419336018
"ENSRNOG00000005985"	"Kcnma1"	"ENSRNOT00000066928.3"	8.40824724838403e-07	1.95112688198157e-05	-4.43630935981939	0.900655495193298	2.30274117263452	0.338043335187096	0.565504937153821	0.978685490371635	3.20921774028	3.50546646256901	0	0.271879283725847	0	0	0.000122516398157636	1.71938359311231	0.0544003600248009
"ENSRNOG00000052782"	"AABR07054809.1"	"ENSRNOT00000091217.1"	8.430195915155e-07	1.95393207544593e-05	-3.83398948427676	0.778453620422574	2.72107698077999	2.66252219693066	2.57011961875402	2.84176192311856	4.67388459958752	5.07915707832365	0	0.0457957874653987	0	0.0866086470624153	0.929228027209371	3.56548908334288	0.212326492347437
"ENSRNOG00000054563"	"Selenoh"	"ENSRNOT00000082857.1"	8.45421750860455e-07	1.95721061177589e-05	0.975218436884384	0.198030824447689	5.27049048803111	11.5674067307267	12.3806904321494	10.8976731830201	12.6370527737298	13.1809965091091	36.1274457442183	26.3035962223531	38.5969287290873	25.3226334953545	18.7842278268939	12.132763925747	29.0269664035814
"ENSRNOG00000014263"	"Olr854"	"ENSRNOT00000019099.3"	8.55167330078066e-07	1.97746219138355e-05	-3.05939014704655	0.621532022854012	0.836547892963329	0.53222884546219	0.356541005284818	0.42368705604961	0.351816553420538	0.418820904358098	0	0	0	0	0	0.416618872915051	0
"ENSRNOG00000054849"	"AABR07031388.1"	"ENSRNOT00000079904.1"	8.56306142299757e-07	1.97778774148651e-05	-1.95370532490012	0.396927033472113	3.76828563138739	2.06358562174076	1.52355463834901	2.03599975747801	3.34791556481216	2.79903582324431	0.375312165024075	0.469690379437892	0.446931064662814	0.086250659960651	0.237081041626373	2.35401828112485	0.323053062142361
"ENSRNOG00000018901"	"Rab14"	"ENSRNOT00000093109.1"	8.68301982792154e-07	2.00315953352644e-05	-3.37544680128299	0.686156481700958	1.25429344338748	1.13939498492149	1.39539820046996	0.69926679842226	0.76762070524492	1.0364806090726	0	0	0	0	0.0640666608368664	1.00763225962625	0.0128133321673733
"ENSRNOG00000035524"	"Mir99a"	"ENSRNOT00000053647.1"	8.8136723891169e-07	2.03093657831546e-05	-3.06984949084477	0.624406232653259	0.841777564862442	22.2672692288054	12.079148403935	8.777531099039	10.1030427208288	9.75370877795372	0	0	0	0	0	12.5961400461124	0
"ENSRNOG00000029876"	"Gucy1a2"	"ENSRNOT00000046058.4"	8.83535346654176e-07	2.03356794014469e-05	0.807156223235456	0.164191343882683	6.78688930814115	10.919272466859	8.47616666625181	12.9555866180279	8.88929378754164	12.7230630997739	18.3276297954417	14.7651486837223	26.3105641548506	22.9571421640848	26.2606207617676	10.7926765276908	21.7242211119734
"ENSRNOG00000019776"	"Sh3gl3"	"ENSRNOT00000079989.1"	8.98476060706754e-07	2.06077547396131e-05	0.835643420299623	0.170099884807047	6.16886954670544	11.8745397790908	12.7835025379197	9.72327298982494	13.7684670827442	8.34995009205876	22.8452962076163	28.7953368762947	26.6339064254184	25.1366579875032	13.8284361268956	11.2999464963277	23.4479267247456
"ENSRNOG00000001199"	"Pop5"	"ENSRNOT00000001591.7"	8.97798307962495e-07	2.06077547396131e-05	1.01564213522994	0.206733404414145	5.09291244130187	3.63978389570397	3.24394752408961	3.41339873578247	3.45621577565436	4.6278298197667	10.037114414762	11.3816914425818	6.72848043478233	10.4459710126223	7.15603706611259	3.67623515019942	9.1498588741722
"ENSRNOG00000010489"	"Samd4a"	"ENSRNOT00000060847.4"	8.9816638646796e-07	2.06077547396131e-05	2.02718500130794	0.412639152559619	5.3232210528601	1.37290569776092	2.39665798740494	2.54612403540514	1.03496396056306	1.03110038326772	19.7444510781815	17.3757627792849	17.4127936978787	2.87081000193478	7.54134709463626	1.67635041288036	12.9890329303832
"ENSRNOG00000002091"	"Gtf3c3"	"ENSRNOT00000082681.1"	9.00576693213277e-07	2.06241488353195e-05	-1.7648070088362	0.359269796531368	5.14307742371038	3.38176778782622	3.35942524631621	4.47294540749378	3.51946809447033	3.97118488253354	0.154910421375196	0.641787659598104	0.651309324566898	0.609515272078199	1.43210682097156	3.74095828372802	0.697925899717991
"ENSRNOG00000054898"	"AABR07021433.1"	"ENSRNOT00000088145.1"	9.01272285986109e-07	2.06241488353195e-05	-1.26641746100732	0.25781831083086	4.9421020972339	5.54331021720699	3.80713635690534	4.99230240732657	9.09841355597101	10.1008789625746	0.852738319565055	1.30670275172187	1.7947889451197	2.35302439631058	1.97676228005843	6.7084082999969	1.65680333855513
"ENSRNOG00000060369"	"AABR07015687.1"	"ENSRNOT00000082217.1"	9.02575813329361e-07	2.06301555856378e-05	-3.54211917140955	0.721149135019444	1.48172307448731	0.854262176601036	0.698471234770071	1.55020891212081	1.3101565760835	2.87479229140852	0	0	0	0.146229503213215	0	1.45757823819679	0.029245900642643
"ENSRNOG00000010034"	"Asah1"	"ENSRNOT00000013463.4"	9.06391279578006e-07	2.06934976813333e-05	-0.861281778731747	0.175380097487494	6.16019235721878	15.6039126316546	16.3133811612277	18.4917207556256	15.7746309205727	15.8075586496699	4.91942747761521	5.60702351280354	6.95317484392469	5.80703923939613	7.8518284703931	16.3982408237501	6.22769870882653
"ENSRNOG00000016896"	"Rpl3"	"ENSRNOT00000067032.3"	9.1411909527208e-07	2.08459126708939e-05	1.14147258825217	0.232513291253284	7.5294559138566	67.7671071891953	51.4765371899901	47.9295994223131	29.5071522853751	34.872305673007	182.250815596248	198.763940760656	84.3559768269001	89.0421790535467	103.664000717181	46.3105403519761	131.615382590906
"ENSRNOG00000025940"	"Mettl9"	"ENSRNOT00000039186.3"	9.18403364742133e-07	2.09195396311435e-05	0.877544518690792	0.178785624182376	5.80522830520519	9.86134808605108	9.99004580623878	6.68388935218249	7.71288963008578	5.98031039117012	21.4570169915909	24.6981842986269	15.3024109772796	15.1904210626781	10.9198787596064	8.04569665314565	17.5135824179564
"ENSRNOG00000011535"	"Gcsh"	"ENSRNOT00000015967.5"	9.21441518952247e-07	2.0964645902499e-05	0.915928685379573	0.186630416912099	5.55642411252832	7.46929499564105	8.93976546185612	8.43332761061682	6.81113093407566	5.12533192890243	15.5748942156649	20.878803914704	18.3988088259551	16.0245240303962	10.9436808068344	7.35577018621842	16.3641423587109
"ENSRNOG00000019848"	"Rbm39"	"ENSRNOT00000026964.7"	9.29319841798861e-07	2.11196459918899e-05	-0.840541714230028	0.171327819754844	6.67807568402048	24.0235137518948	22.1504753567984	23.3522167613345	22.4802550768026	21.5512512009639	10.9461924756441	9.03029199325577	8.94175746079662	6.92992512042532	8.17260733951848	22.7115424295588	8.80415487792806
"ENSRNOG00000036647"	"Olr292"	"ENSRNOT00000054880.5"	9.3334067844745e-07	2.1186726488881e-05	-3.51125469151146	0.715823517594173	1.78027153832399	0.411647226927756	0.406018044613497	0.535502037313708	0.48944432028754	0.693699038986265	0	0	0	0.0567807835157401	0.0175452435954778	0.507262133625753	0.0148652054222436
"ENSRNOG00000038150"	"RGD1560394"	"ENSRNOT00000058062.3"	9.41692055288479e-07	2.13518437753453e-05	1.26798440169172	0.258590399526291	5.0859932656563	6.70636882160999	5.66998692216299	5.45988715341789	12.8566967647145	16.3507692272276	25.4300521752733	27.5703962329242	15.5843097209655	42.5473690564315	27.6127382310328	9.4087417778266	27.7489730833255
"ENSRNOG00000042653"	"Ndufaf8"	"ENSRNOT00000065565.2"	9.50978555222142e-07	2.14641708756688e-05	1.66206527635026	0.339091791749342	3.86027906514061	4.03834621393839	2.30679370969651	3.42838230467184	5.2541739929298	3.94434047259066	15.3080371935956	11.4840431807249	16.2022307207635	29.310334348123	16.2805303215503	3.79440733876544	17.7170351529515
"ENSRNOG00000009950"	"Msantd2"	"ENSRNOT00000013370.6"	9.47905775918722e-07	2.14641708756688e-05	-1.52505091928168	0.311098007000698	4.09874082697641	4.06335651101505	3.95172938944213	3.75202445030501	3.88578919655244	4.77514721085349	0.551449887158553	1.00528517196082	0.559810659073306	0.738055210216104	1.21565888099456	4.08560935163362	0.814051961880669
"ENSRNOG00000056731"	"AABR07027799.1"	"ENSRNOT00000077512.1"	9.49289405199484e-07	2.14641708756688e-05	1.92733470543353	0.393183609729765	3.86884717338207	0.389052119617089	0.663706296940823	0.444391445082691	0.699352377222191	0.798476409501553	2.51820221909057	3.67617276780538	3.50655096390223	4.47262134708531	4.20217689776595	0.598995729672869	3.67514483912989
"ENSRNOG00000042499"	"LOC100364435"	"ENSRNOT00000041880.3"	9.50749759509676e-07	2.14641708756688e-05	1.37506447545331	0.280535661032256	5.51736950528547	18.6209986071945	21.3210114898132	17.8399261227755	14.4194980255424	13.3552588169759	88.559099678483	58.6577720775279	72.3562339918657	76.4145677960348	22.5749235742357	17.1113386124603	63.7125194236294
"ENSRNOG00000038068"	"Pcdh9"	"ENSRNOT00000057924.4"	9.52881675482513e-07	2.14826577508953e-05	-0.805528009901687	0.164355651543968	7.01493009543054	25.2648588514366	25.9654470132955	29.6624616112259	18.4607845345836	19.7727149648379	8.43992523323262	8.82984717934191	10.7331649476414	8.68664018519359	10.1877108892923	23.8252533950759	9.37545768694036
"ENSRNOG00000061981"	"AABR07062912.2"	"ENSRNOT00000092591.1"	9.66334431898516e-07	2.17611925419692e-05	-3.39240256286659	0.692557004634557	2.03078146063904	4.49243481325072	4.7820993971836	4.45819893695963	4.71752246229013	4.97128750534288	0	0	0.623189171129907	0	0.566669696690807	4.68430862300539	0.237971773564143
"ENSRNOG00000059379"	"AABR07060261.1"	"ENSRNOT00000086493.1"	9.72090161500796e-07	2.18659599664714e-05	-3.36217302202902	0.686549260905936	1.54622773161716	1.65730394876585	2.70890922682939	3.45848639418598	2.56392360729671	1.77552910132749	0	0.631614767961265	0	0	0	2.43283045568108	0.126322953592253
"ENSRNOG00000016855"	"B3galnt2"	"ENSRNOT00000085150.1"	9.84644794843208e-07	2.21232493190565e-05	-3.66616575062727	0.749009894396361	1.13993569475369	0.366099700667287	0.549067922318059	0.505820817286852	0.789565860456787	0.757748274205393	0	0	0	0	0	0.593660514986876	0
"ENSRNOG00000051406"	"RF00100"	"ENSRNOT00000089687.1"	1.00423352179288e-06	2.25378207263528e-05	-2.10159006103062	0.429702097114939	3.57369864869436	39.1565986564403	41.265760781214	48.267707197759	61.8537374458313	60.1026730888581	8.90321952216887	2.72314121369432	2.0956361172604	5.04344784501948	8.9338990658776	50.1292954340205	5.53986875280413
"ENSRNOG00000027091"	"Kctd18"	"ENSRNOT00000092859.1"	1.00732007003496e-06	2.25815179048448e-05	1.45260352187175	0.29704359979801	4.88366305068029	1.65882245127626	1.38663855895939	1.48758131936303	1.05751131168694	1.10662218332744	6.91895598427293	9.83027345947048	7.27666185388592	3.06135453102508	2.15907358390292	1.33943516492261	5.84926388251147
"ENSRNOG00000058522"	"Fam214a"	"ENSRNOT00000080608.1"	1.0095741925204e-06	2.26064765798609e-05	-0.873822729446817	0.1787045133179	5.87050101651212	6.96888585250797	6.67767170208945	6.02216480789767	6.35940532644435	5.02488884310634	2.34446844738016	1.74710176219575	2.09914654365116	2.2869572157548	3.22061384373766	6.21060330640916	2.33965756254391
"ENSRNOG00000062170"	"AABR07058158.1"	"ENSRNOT00000093358.1"	1.01095459164148e-06	2.26118365040173e-05	-3.36478611095685	0.688166515977145	1.4533840810167	1.55583949479679	1.80521164268065	2.99170163757853	2.95923822459853	1.79952186355804	0	0.37970360632372	0	0	0	2.22230257264251	0.075940721264744
"ENSRNOG00000061072"	"AABR07059778.1"	"ENSRNOT00000086248.1"	1.01962266920492e-06	2.27800027459231e-05	-3.0617186735086	0.626398477641705	0.837712156194353	2.12683782285629	3.90491007891844	4.49009831129069	6.51144374399899	6.52711651393055	0	0	0	0	0	4.71208129419899	0
"ENSRNOG00000014289"	"Arpc2"	"ENSRNOT00000078316.1"	1.03144830029122e-06	2.30182555933234e-05	-3.39432089822722	0.694768574559902	2.25466933600931	3.2832829390628	3.74249955402349	2.07183079070875	12.5378307345104	11.5039120489853	0.122131954344304	0	0	0.26719131450423	0.864797224191096	6.62787121345815	0.250824098607926
"ENSRNOG00000006957"	"Gria4"	"ENSRNOT00000009542.5"	1.03489849155882e-06	2.30692726740395e-05	-4.99705910530614	1.02296375344351	2.80993171521608	3.43087247244212	2.36760919446175	3.34592583366958	2.41631410252756	1.16658363908136	0	0	0	0.774481320616063	0	2.54546104843647	0.154896264123213
"ENSRNOG00000016532"	"Ino80c"	"ENSRNOT00000022169.6"	1.0425218205898e-06	2.32130954141888e-05	0.865168460296624	0.177163822148441	5.8664636118525	5.03625732840339	5.16507655461953	4.44206857826536	4.32946795962895	3.43803246898347	11.3639884180155	11.0217093663937	11.2769554342015	8.58923557018251	6.01138639547838	4.48218057798014	9.65265503685432
"ENSRNOG00000049931"	"LOC288913"	"ENSRNOT00000072494.2"	1.04883304065294e-06	2.33274123082146e-05	0.908816960961303	0.186147239268939	5.56322205968286	13.2490532296657	17.250583881827	13.2423077671558	18.0817173112559	22.8299722741425	37.7457079615761	24.5180449954708	35.9191028429577	40.6130798046429	44.4752858155421	16.9307268928094	36.6542442840379
"ENSRNOG00000047499"	"Rbm15"	"ENSRNOT00000070994.2"	1.05118860914119e-06	2.33274408368993e-05	-0.998598673946042	0.204555190531334	5.20239662756253	4.94289618819538	4.78511271123558	5.0094824777806	3.90727165593288	3.94678925893257	1.88226609968467	1.34143757149092	1.23059725611752	1.18012335868062	1.86511555052401	4.5183104584154	1.49990796729955
"ENSRNOG00000007646"	"Sipa1l1"	"ENSRNOT00000010626.7"	1.05029145864298e-06	2.33274408368993e-05	0.999568298007316	0.204746750591943	5.55976825455133	3.55289796524113	2.77329918368967	5.1835733572384	2.24712941672185	2.55995095345547	8.48980037957298	8.20240383951659	9.44342384240528	5.84520483920554	6.37090954427238	3.2633701752693	7.67034848899455
"ENSRNOG00000012886"	"Maff"	"ENSRNOT00000017181.4"	1.05729705244504e-06	2.33583675454888e-05	1.86601088110851	0.382327324273665	3.64771765523469	0.701494594812131	0.187474578977545	0.42772461334051	0.22998315411806	0.668655449350942	3.32107309451928	1.84454709885369	2.20909771684512	2.89287605813396	1.62755489907275	0.443066478119838	2.37902977348496
"ENSRNOG00000000774"	"Gabbr1"	"ENSRNOT00000082545.1"	1.05625843297584e-06	2.33583675454888e-05	-3.51273370555885	0.71969609911228	1.61695994181026	0.372378361980577	0.205068470963542	0.613375149411992	0.373576639049183	0.966067225163942	0	0	0	0.100463420183846	0	0.506093169313847	0.0200926840367692
"ENSRNOG00000019041"	"Psme1"	"ENSRNOT00000025887.5"	1.05560212117203e-06	2.33583675454888e-05	0.837524487817743	0.171589429244001	6.0826641395396	19.1511743964176	22.5415141442026	15.4121330682299	15.1310522969616	12.7231925058549	43.4049627661877	47.5874399564931	29.6528383107595	29.8747312324019	24.7776011765608	16.9918132823333	35.0595146884806
"ENSRNOG00000009873"	"Ints6"	"ENSRNOT00000086271.1"	1.05486880817667e-06	2.33583675454888e-05	-0.887547591319029	0.181832903458666	5.76169522336343	6.43204413167549	5.28352287421734	6.89082264678744	5.50250759009783	5.89352842327547	2.53203630803	1.5332796749746	2.46502251088503	2.15651502463599	2.4252590615559	6.00048513321071	2.2224225160163
"ENSRNOG00000047781"	"Slc25a23"	"ENSRNOT00000073000.2"	1.05855266626005e-06	2.33600647965205e-05	1.84814202261518	0.378684329932272	6.39832786354812	4.35304245460602	9.55137944091726	6.15987058930845	15.694144131982	15.9983968478535	24.7835364372014	47.5058636803286	31.9391068673406	103.502461085979	93.8906941688166	10.3513666929334	60.3243324479332
"ENSRNOG00000027456"	"Cdc42bpg"	"ENSRNOT00000038016.5"	1.06532834280874e-06	2.34834391206239e-05	2.1579720090922	0.442282540079097	3.40772101429726	0.0877479568927819	0.108769191871452	0.112842904050781	0.0598997367070635	0.0456160320268444	1.20193717194471	1.4643215443802	0.436672947795169	0.598905894854197	0.220205852903061	0.0829751643097845	0.784408682375467
"ENSRNOG00000030118"	"Msn"	"ENSRNOT00000076377.1"	1.07079899556665e-06	2.35778041057159e-05	-3.06630038687348	0.628577212148603	0.840003012876794	0.671964346743458	0.457272432336625	0.395961955998169	0.183228288507881	0.128430373744013	0	0	0	0	0	0.367371479466029	0
"ENSRNOG00000014450"	"Shprh"	"ENSRNOT00000019893.6"	1.07297132557632e-06	2.3599414826799e-05	-5.13260942024764	1.0522471318303	2.9114069067525	1.34526240599964	2.19214421405746	0.914554361086472	2.1846071067064	1.95157858373242	0	0	0	0.528830550111434	0	1.71762933431648	0.105766110022287
"ENSRNOG00000060206"	"Zfp592"	"ENSRNOT00000091569.1"	1.07545447681382e-06	2.36205549714507e-05	1.08779345446203	0.223031695917911	6.34215239504882	1.98642570810171	1.67351670857959	1.58829124972783	2.89925318552351	3.20765740398008	4.58170439316491	4.10932405992896	4.62416504149595	8.34740232794661	8.83447109462276	2.27102885118254	6.09941338343184
"ENSRNOG00000054743"	"RF00105"	"ENSRNOT00000079198.1"	1.07631635157794e-06	2.36205549714507e-05	-3.045674572858	0.624478827785413	0.829690105869056	7.65647820943574	10.637302601843	16.786057121417	13.8003605722265	11.6410165026943	0	0	0	0	0	12.1042430015233	0
"ENSRNOG00000016580"	"Rps23"	"ENSRNOT00000022348.6"	1.08739347921184e-06	2.38372528512622e-05	1.69850083133559	0.348401463779467	7.31001002179653	144.557480432987	147.943131386139	113.617244177127	54.4495466171782	58.4764741619682	668.134447370369	771.313358768573	521.109774166507	275.362294954286	243.718812182098	103.80877535508	495.927737488367
"ENSRNOG00000010802"	"Ube3d"	"ENSRNOT00000080195.1"	1.09017646967065e-06	2.38718531485781e-05	1.68348979602993	0.345358102201342	3.98903609961913	1.10311420473233	0.905077922467872	0.506134881362063	0.645970468291143	1.59580538532754	4.87210105069979	2.90086899162967	4.14830319677498	3.7863911376961	6.38257869586203	0.95122057243619	4.41804861453251
"ENSRNOG00000030431"	"RT1-Db2"	"ENSRNOT00000083085.1"	1.09246101614177e-06	2.38954745660944e-05	-3.02133312361018	0.619861404448683	0.817519381245143	0.692067832393717	0.731616845261597	0.481253329102305	0.770798539121047	0.766041938618761	0	0	0	0	0	0.688355696899485	0
"ENSRNOG00000061763"	"AABR07012039.1"	"ENSRNOT00000081080.1"	1.10248732248968e-06	2.40881932412106e-05	-3.43752325247202	0.705508745291879	2.05095585561392	28.0227212398367	24.9341336667431	57.2781489042443	15.1479662132214	21.4405797327594	0	0	0	1.89959030777146	7.10898987071637	29.364709951361	1.80171603569757
"ENSRNOG00000010448"	"Ptbp1"	"ENSRNOT00000093324.1"	1.10947785976678e-06	2.42142321002183e-05	-3.06547090758402	0.629310900602108	0.839588273232066	0.786215798694001	0.302065394165566	0.712302410076048	1.83401314640162	3.95771882886187	0	0	0	0	0	1.51846311563982	0
"ENSRNOG00000041475"	"AABR07073059.1"	"ENSRNOT00000063228.1"	1.15462112989445e-06	2.51717567999102e-05	-3.46132582661732	0.711728065795065	1.96167928534407	28.1557748278596	31.8635118563096	44.668384261652	132.676888190052	124.811928041022	0	0	0	3.35432462308826	13.2625316555447	72.435297435379	3.32337125572659
"ENSRNOG00000020857"	"Ppfia1"	"ENSRNOT00000092824.1"	1.15881004392231e-06	2.52353171872619e-05	2.42537760574925	0.498786814778856	5.22285398651964	0.960672484677145	0.488348537012469	0.149613404078945	2.05564144177143	1.9312391953418	6.7143025559319	5.52069181760884	11.6469516810504	7.71210135980511	9.30733193212106	1.11710301257636	8.18027586930346
"ENSRNOG00000041637"	"AABR07005447.1"	"ENSRNOT00000063390.2"	1.17182233585839e-06	2.54906731390842e-05	-3.63374935445789	0.747632206524064	1.92758233642129	111.912676317074	39.6683263205589	81.1993851263912	95.0375420764761	101.038589603954	0	0	13.5258072309782	0	2.30657134496199	85.7713038888908	3.16647571518804
"ENSRNOG00000014806"	"Pnkd"	"ENSRNOT00000074131.2"	1.18150987896064e-06	2.56732250782488e-05	1.05859933044119	0.217876469112792	4.90605216929986	9.19317993073989	8.75831093376608	8.43051818588263	9.96839339505858	7.00821610758589	30.4415136759104	22.8160633998714	27.5082774324483	23.1551138499169	10.8962741016023	8.67172371060661	22.9634484919499
"ENSRNOG00000018816"	"Cox5a"	"ENSRNOT00000025525.4"	1.19504363876057e-06	2.59388606673803e-05	0.860465365330644	0.177179631447363	6.78745864736747	69.7733047088767	65.064329857602	79.5811784204428	52.79395482608	68.1854895349863	157.352940732091	161.38093294897	193.10588042036	98.3070855781544	99.2952063405588	67.0796514695976	141.888409204027
"ENSRNOG00000017801"	"Atf4"	"ENSRNOT00000092302.1"	1.20731903909842e-06	2.61766317262728e-05	-3.01338383410683	0.620748924382978	0.813544736493472	0.958834771757373	1.20304040700246	0.497255642544471	0.851406552105041	0.763048383091319	0	0	0	0	0	0.854717151300133	0
"ENSRNOG00000023786"	"Ybx1"	"ENSRNOT00000015875.7"	1.2107509384927e-06	2.62223512001201e-05	1.52952973499936	0.31511551000454	7.54293136038437	46.0278513507262	49.3639195133783	44.7086032852977	17.9199917889162	16.2278291353114	172.533376956773	202.088230041574	143.106077869989	95.5898464781535	71.247537101905	34.849639014726	136.913013689679
"ENSRNOG00000054149"	"SNORD113"	"ENSRNOT00000087586.1"	1.23323662519675e-06	2.66801858095241e-05	-3.34197851386305	0.689036262682199	1.25579846895296	27.893630203757	15.3586276849239	31.689488602985	17.5675873153302	17.0582104484169	0	0	0	0	1.8126350393546	21.9135088510826	0.36252700787092
"ENSRNOG00000045909"	"Mir344i"	"ENSRNOT00000071136.1"	1.23638482015346e-06	2.67191253882018e-05	-3.32758069277344	0.686139315897485	1.13999254543031	29.366194948838	24.9635859115764	19.8014823401823	20.5728937499069	25.3807726987576	0	0	0	0	0.680418163700089	24.0169859298522	0.136083632740018
"ENSRNOG00000053622"	"SNORD113"	"ENSRNOT00000088384.1"	1.23915649221527e-06	2.67498520765032e-05	-3.31322142010534	0.683241048125739	2.33686312725935	96.8726289924516	64.6017176839593	87.3645072752926	40.9730956849448	41.1732539654573	2.6858703333931	0	2.16300445767482	0	15.2001644008699	66.1970407204211	4.00980783838756
"ENSRNOG00000014013"	"Map4k4"	"ENSRNOT00000083322.1"	1.25209302474319e-06	2.69997034508552e-05	0.804849375830182	0.166043812178023	7.54142408064926	13.8098297570677	14.7223466187798	11.9511224067457	17.4656585732388	13.445730304712	24.4016211353722	34.675862310782	19.5290025666429	42.8382293510779	25.3758855329381	14.2789375321088	29.3641201793626
"ENSRNOG00000045720"	"LOC103690168"	"ENSRNOT00000074027.1"	1.25351765893158e-06	2.7001042877225e-05	-3.01527799853918	0.622093500415909	0.814491818709643	0.367049477203602	0.278458917456759	0.432927896916528	0.316543178278278	0.397662260092263	0	0	0	0	0	0.358528345989486	0
"ENSRNOG00000031127"	"Snrpe"	"ENSRNOT00000042614.2"	1.26401635406995e-06	2.71976244175942e-05	1.07590836824573	0.222050603144046	4.83266474303975	17.9384300333613	12.3395965803402	15.0433438809382	16.0804669081129	15.7604549440446	35.0109026063338	21.714190814837	25.7095528027859	67.3580315030411	62.5873940900237	15.4324584693594	42.4760143634043
"ENSRNOG00000019773"	"Egln1"	"ENSRNOT00000026767.7"	1.28180272255398e-06	2.75329563020995e-05	1.09395068057062	0.225903624657273	5.38343826489012	15.8671944697506	16.3257475687433	14.3902719960618	8.19071817207345	9.46790061922944	37.0194462085073	37.3009227681203	43.6075801469056	17.7965638277974	32.9612280061934	12.8483665651717	33.7371481915048
"ENSRNOG00000060821"	"Rnf114"	"ENSRNOT00000086459.1"	1.28237970766705e-06	2.75329563020995e-05	1.01917835895905	0.210466833459262	6.59288973883122	9.0162373562076	8.63106492028786	9.05952029104607	13.5986742044132	13.026941500389	18.6584846801903	17.359098635227	23.735178977585	46.5423057358547	31.7274124817515	10.6664876544687	27.6044961021217
"ENSRNOG00000059377"	"AABR07009536.1"	"ENSRNOT00000087131.1"	1.28398627474133e-06	2.75376147257024e-05	-3.48258547457715	0.719213057559546	2.37426665839786	4.63131532901872	4.71705593438398	6.56322912777609	29.0252467318616	23.3012432696219	0.206757439792209	0	0	1.32403930074924	0.706182797369073	13.6476180785325	0.447395907582104
"ENSRNOG00000047436"	"Cabyr"	"ENSRNOT00000071392.1"	1.28746067831304e-06	2.75822792023021e-05	-2.99031811100292	0.617619957798592	0.802011874941513	0.306556399251577	0.174031790317363	0.207207584697547	0.156444282906119	0.394654699085456	0	0	0	0	0	0.247778951251612	0
"ENSRNOG00000060658"	"AABR07049682.1"	"ENSRNOT00000091707.1"	1.30278613711591e-06	2.78804674721663e-05	-3.32037746596172	0.686123607012556	1.4582134788558	0.115312707349444	0.191479182484458	0.193791229409957	0.497854188729488	0.229661972528647	0	0	0	0	0.047029617391406	0.245619856100399	0.0094059234782812
"ENSRNOG00000002122"	"Lrrc8c"	"ENSRNOT00000002896.5"	1.30436601697895e-06	2.78841654352447e-05	-0.920122227940256	0.190143745936252	5.5243192286666	2.65166621859668	2.91920295054771	2.55063185431762	3.24028289311269	2.57990983396972	1.11701861056687	1.04890752991428	0.563556659753675	0.925386823780429	1.5168133933864	2.78833875010888	1.03433660348033
"ENSRNOG00000002839"	"Slc19a2"	"ENSRNOT00000003817.5"	1.30749190048184e-06	2.79208696032851e-05	-3.75949196842499	0.776977402129377	2.26895004049158	0.746806618307238	0.904276391044486	1.03324137245561	0.86076838821735	1.01307597281677	0	0.0562166479994518	0.143130416371459	0	0	0.911633748568291	0.0398694128741822
"ENSRNOG00000011341"	"Rictor"	"ENSRNOT00000029565.6"	1.32014493940455e-06	2.81422270432463e-05	-0.850635576914941	0.1758711769203	5.97329304538917	5.39664901234248	5.71171459911676	5.55933160491643	5.18982710422891	4.55123600128043	2.08048874937255	2.45484627931048	1.77948497667167	2.06058884880738	1.72260112817306	5.281751664377	2.01960199646703
"ENSRNOG00000030445"	"Ormdl3"	"ENSRNOT00000049621.3"	1.32069794369577e-06	2.81422270432463e-05	0.851163163944607	0.1759832872587	5.90026926427266	27.5495105737583	33.9226643117024	31.1378566936606	31.2404637032594	36.9994293991217	65.8188738538962	81.6478693842961	47.3427621879987	55.0173252463364	82.5972111414979	32.1699849363005	66.4848083628051
"ENSRNOG00000028624"	"Kif26b"	"ENSRNOT00000017784.6"	1.3266401784994e-06	2.82253352712444e-05	0.918070226710787	0.189851784973683	5.47627625938999	0.991662670081427	1.14087871175118	0.662678233649551	1.13295743429686	0.994070973993891	1.45291543624252	3.02563434085294	1.68186122063992	2.71157456775425	2.36908075877164	0.984449604754582	2.24821326485225
"ENSRNOG00000005509"	"Pak7"	"ENSRNOT00000007410.4"	1.32744676150779e-06	2.82253352712444e-05	-4.24851490267204	0.878591069876651	2.2980413465038	1.28747353980656	0.612625123182519	0.932086205290863	1.36955309091175	0.991327866517655	0	0	0	0.395144447175296	0	1.03861316514187	0.0790288894350592
"ENSRNOG00000000931"	"Sfswap"	"ENSRNOT00000093278.1"	1.33654795944145e-06	2.83883932607194e-05	-3.5537832324171	0.735127491168717	1.50490052262083	0.63808032212238	0.536592510296222	0.652257884652243	0.477873853062694	0.95516128492497	0	0	0	0.0764069134714341	0	0.651993171011702	0.0152813826942868
"ENSRNOG00000024923"	"Nnat"	"ENSRNOT00000034166.4"	1.34538082968552e-06	2.85454088885203e-05	1.44158502904021	0.298283860927941	10.8333061653366	1035.07672914763	555.750040964651	1496.26160592506	1482.20611842956	1690.2872670294	3714.88538983526	2079.80941135518	5893.85807196488	7297.47479509378	4737.30268873468	1251.91635229926	4744.66607139676
"ENSRNOG00000059479"	"Adcy1"	"ENSRNOT00000088032.1"	1.35244020183281e-06	2.8664499978311e-05	0.915927984478162	0.189559008090462	8.31970587330133	37.0260497283481	25.2741258488157	52.5909169475233	30.1570194227964	47.3845740302592	71.6086142694155	57.210910558159	113.236405522307	76.4665420952367	108.340608730587	38.4865371955485	85.372616235141
"ENSRNOG00000010642"	"Lysmd2"	"ENSRNOT00000083410.1"	1.36679674550761e-06	2.89378323779106e-05	-3.45534640644497	0.715424287297062	1.42406052663635	1.58718420942723	0.253919476118958	0.581985987955085	1.3273150168162	0.812440519019318	0	0	0	0.0879766251236805	0	0.912569041867358	0.0175953250247361
"ENSRNOG00000028837"	"AC128207.1"	"ENSRNOT00000048453.4"	1.37334506361694e-06	2.90454419697939e-05	1.62878277624562	0.337303501676316	5.3304736498084	5.52109033750965	8.76371401424084	7.0904995495909	16.8960913878067	16.4497243544139	30.9286620693407	30.3399006061627	26.7030969485558	118.276221045581	56.8224063236105	10.9442239287124	52.6140573986501
"ENSRNOG00000041744"	"AABR07065531.1"	"ENSRNOT00000063497.1"	1.39647174704769e-06	2.95030710141194e-05	-2.86149162763007	0.592992881748189	3.56714755244267	87.6003177725872	52.8566735683048	127.186789837984	463.892560109065	520.079789285445	6.74878703125312	1.61559936248644	8.74641251274539	20.4714709908924	21.0767549656658	250.323226114677	11.7318049726086
"ENSRNOG00000049240"	"AABR07006090.1"	"ENSRNOT00000071809.1"	1.40686698107595e-06	2.96910361703749e-05	-3.30575345165222	0.685268104427756	1.54227655985497	22.4726683163125	29.2138457070513	28.5726412688563	25.0089002634595	36.5749040814627	0	0	0	0	10.8541759175527	28.3685919274285	2.17083518351054
"ENSRNOG00000004201"	"Rims2"	"ENSRNOT00000006393.4"	1.41513198948456e-06	2.98336921655484e-05	-3.44188043991854	0.713659391258284	1.41162549691044	0.91306048813781	0.446875814275323	0.702212808894824	0.339653764974856	0.732055925385293	0	0	0	0	0.0688614597174793	0.626771760333621	0.0137722919434959
"ENSRNOG00000017241"	"Dpcd"	"ENSRNOT00000023278.5"	1.41744930309239e-06	2.98507894148585e-05	0.832207639025415	0.172566417090049	6.05551372047405	19.430892042817	22.106823697957	22.4115175139098	13.4045270924247	19.7442938798407	44.4098929015634	42.9078994692546	49.8050214443698	28.3723617610126	32.2184735062382	19.4196108453898	39.5427298164877
"ENSRNOG00000008159"	"Msantd3"	"ENSRNOT00000083796.1"	1.42492490575432e-06	2.99763660905874e-05	0.972204205895422	0.201639938448662	5.27988142130105	1.67910528056838	2.2419676638496	1.93275125371906	1.2257973937384	1.63201688752825	4.03553566912752	5.14726234412571	4.31446646755112	3.55151742219852	3.35366109881594	1.74232769588074	4.08048860036376
"ENSRNOG00000013481"	"Cdh11"	"ENSRNOT00000018535.5"	1.43822885689277e-06	3.02241582789437e-05	-0.966011472223433	0.200432598598285	6.22559811065788	6.66226374722015	8.98137238640888	6.292183924314	9.78137732438638	7.05952811726992	2.55211691141403	2.19276485972855	1.47977447907924	3.98942812402984	3.52110169158263	7.75534509991987	2.74703721316686
"ENSRNOG00000014035"	"Arhgef4"	"ENSRNOT00000018935.7"	1.44120604774878e-06	3.0254640093472e-05	0.796346752299898	0.165243911257514	6.61205789503713	16.6576864776505	19.0004589192055	18.8582936485708	20.0653721158261	17.7439013123231	34.8262045087178	35.8555252738486	40.8137011264542	40.0929001183618	30.5647876202183	18.4651424947152	36.4306237295201
"ENSRNOG00000058148"	"RF00151"	"ENSRNOT00000083320.1"	1.44512667183636e-06	3.03048415405091e-05	-2.98103263636433	0.618641196747172	0.797369137622218	21.7737195979518	6.92505272500622	20.2179893939372	15.209339614067	8.32318917312371	0	0	0	0	0	14.4898581008172	0
"ENSRNOG00000001173"	"Cabp1"	"ENSRNOT00000039281.4"	1.44866859838283e-06	3.03470038204572e-05	1.18836056045701	0.24664048557501	4.58361471562226	3.07341342285795	2.86774892611674	4.80973331352955	3.35668749947166	3.20530208970472	9.13000814944709	12.1916527176487	12.6610568599744	9.05646111646695	7.46278185205163	3.46257705033612	10.1003921391178
"ENSRNOG00000030199"	"Tmem192"	"ENSRNOT00000042181.5"	1.45276420542751e-06	3.04006634202291e-05	1.44209181729382	0.299336612243046	5.56773274619293	2.76835154370498	2.48974196955282	2.27487968721986	3.42037674905451	3.478778429916	6.92411944515205	7.19954393934518	6.14183533190221	21.8773747085588	21.2421040449831	2.88642567588963	12.6769954939883
"ENSRNOG00000009888"	"Timm8b"	"ENSRNOT00000013188.5"	1.45941887685943e-06	3.05077045176407e-05	1.28974074781949	0.267763633254892	6.20845985188618	48.8561284119573	44.5510923855442	62.6561778936412	33.6669129715191	28.6412695449093	168.503379314826	149.125001800045	206.91623104365	100.861639529526	74.5758218562398	43.6743162415142	139.996414708857
"ENSRNOG00000011308"	"Uhrf2"	"ENSRNOT00000015406.5"	1.46860785184698e-06	3.0667441306693e-05	-0.897179114753128	0.186312214077448	5.59674286629227	5.87567691642371	5.38226353554779	5.51259211795353	5.87028669414396	6.35992241441904	2.22003191780926	1.89772856439039	3.10336296704943	1.37832148024031	2.26062015472252	5.80014833569761	2.17201301684238
"ENSRNOG00000053640"	"Kcng2"	"ENSRNOT00000088054.1"	1.47144333247443e-06	3.06943079154167e-05	1.0960527807125	0.227629412577496	5.78834024450438	4.73413174724908	4.24992159555954	4.78126372540713	8.42865450420698	5.28453175115494	9.66553979774203	12.2996689669185	12.334777236898	29.4849029703452	13.2361042934538	5.49570066471553	15.4041986530715
"ENSRNOG00000062093"	"AABR07061240.1"	"ENSRNOT00000092929.1"	1.47507841666305e-06	3.07377802134718e-05	-3.41913617417971	0.710162524966992	2.67324316776241	0.657898886999469	0.906407242495806	1.04625547495582	6.73158185300676	6.31093162220226	0.03194042934547	0	0.051754179883613	0.0701192159352094	0.233593752328724	3.13061501593202	0.0774815154986033
"ENSRNOG00000013176"	"Far1"	"ENSRNOT00000076430.2"	1.47831188421863e-06	3.07728010604628e-05	-0.848651761280369	0.176282953790661	6.00842939190927	9.26122577905174	9.9497716753707	8.93076389832016	7.77361356140113	5.79783007703384	5.18924111588954	2.30303398735436	3.28604550743295	3.07867824284539	2.4572408561862	8.34264099823551	3.26284794194169
"ENSRNOG00000016117"	"Myof"	"ENSRNOT00000021546.7"	1.51493983431999e-06	3.15021644246792e-05	-3.75063013936759	0.779877606491051	1.18216788912385	0.0935496716787392	0.0957910270609621	0.307053280394358	0.0870007415705192	0.199557401177411	0	0	0	0	0	0.156590424376398	0
"ENSRNOG00000062108"	"Tomm5"	"ENSRNOT00000093024.1"	1.52962234510228e-06	3.17741362818573e-05	0.868624212032052	0.180687592477182	5.74072989221334	21.1662662265608	28.8775680965474	24.497258863517	16.8748258115883	19.2845211508456	51.659066500337	48.112979388116	63.3656928923196	31.9896387620156	37.5953672498222	22.1400880298118	46.5445489585221
"ENSRNOG00000027864"	"Ppial4d"	"ENSRNOT00000091873.1"	1.53809441536508e-06	3.19166670463767e-05	0.882604908111598	0.183637998566958	8.6370141922881	356.711736726531	370.977746151455	343.955406400588	259.617192507193	237.190814891581	745.92514915608	644.927874548289	767.518183267796	822.246210912219	393.458066484062	313.69057933547	674.815096873689
"ENSRNOG00000053358"	"AABR07003699.1"	"ENSRNOT00000090501.1"	1.58691147867437e-06	3.28952141975836e-05	-3.07269224045985	0.64014851188894	0.843198939669979	0.82767609052105	0.607685084644083	1.59293933993034	0.825823038456184	0.624280208379896	0	0	0	0	0	0.895680752386311	0
"ENSRNOG00000008459"	"Anapc13"	"ENSRNOT00000011203.4"	1.59155020749455e-06	3.29568970343986e-05	1.46795003757006	0.305862227824783	5.03876234693579	10.7369168970985	8.6497402581915	11.4025315180805	6.55132979923188	5.22244048693483	40.9926260585001	48.8876447534328	45.4037914270213	22.5255378233505	13.9745819927352	8.51259179190744	34.356836411008
"ENSRNOG00000052113"	"Ppp1r9b"	"ENSRNOT00000089497.1"	1.6041939255153e-06	3.31840407327105e-05	1.22415366830008	0.255149060890556	8.8607472118992	31.5117117117634	36.5559391914578	37.8569162712159	47.5893780480405	56.7817850211229	70.8514125683633	90.5270003489276	105.343866096533	236.444960735204	188.943580015153	42.0591460487201	138.422163952836
"ENSRNOG00000004067"	"Nrcam"	"ENSRNOT00000093300.1"	1.60875484167095e-06	3.32436858158428e-05	-3.07968615206939	0.641971859989173	0.846695895474751	2.76233086152458	1.07939776312915	3.88436588823691	2.20781453513575	2.55350431736931	0	0	0	0	0	2.49748267307914	0
"ENSRNOG00000047261"	"AABR07031445.1"	"ENSRNOT00000071364.2"	1.61701141811449e-06	3.33794950758071e-05	-3.37052720441845	0.702749021931718	1.56562807668049	0.803836611520874	0.875377326543497	1.08858351274375	0.798104468252089	0.905695648580103	0	0.262430861912336	0	0	0	0.894319513528062	0.0524861723824672
"ENSRNOG00000038140"	"Nsd2"	"ENSRNOT00000021952.6"	1.62115334200646e-06	3.34301725062872e-05	0.865112139566616	0.180393651387709	6.93965238076547	7.09861442387887	6.88264679283029	7.20196071991144	3.77056960342648	4.32905584976976	14.6005132597549	14.1299141670349	14.954246719372	8.1569553348569	9.75296806468651	5.85656947796337	12.318919509141
"ENSRNOG00000057126"	"AABR07050134.1"	"ENSRNOT00000087947.1"	1.65689737034888e-06	3.41317413598792e-05	-2.98327974512749	0.622642891198698	2.93765653454751	1.66245315203896	1.17611013808598	2.43005260861546	2.79324810627655	2.62630060637442	0	0.127411818755546	0.0721095091317983	0.1492743219192	0.32282155481708	2.13763292227827	0.134323440924725
"ENSRNOG00000052358"	"SNORD113"	"ENSRNOT00000085768.1"	1.66192668341789e-06	3.41997934426711e-05	-3.00970626137422	0.628238117166443	0.811705950127165	60.5012397702756	8.01759492362298	7.71134076217795	8.28762508403855	4.2409375205878	0	0	0	0	0	17.7517476121406	0
"ENSRNOG00000004773"	"Yaf2"	"ENSRNOT00000006621.6"	1.66957028094706e-06	3.43214463252364e-05	0.80149075303881	0.167333217186966	6.38494845045568	11.3069747774517	11.8013981668993	12.2116410865093	15.7192936059913	9.00949164054805	23.284512002874	20.2409746004918	26.2415305709936	29.7635005452688	19.0645981070264	12.0097598554799	23.7190231653309
"ENSRNOG00000054311"	"LOC102551526"	"ENSRNOT00000084328.1"	1.67973784011264e-06	3.44589697489774e-05	-3.37865695378395	0.705566963704623	1.88530198842281	0.68858761217527	0.563554128092225	0.831764966791736	3.02982559202835	3.43766423219767	0	0.200792371215618	0	0	0.0891411177201099	1.71027930625705	0.0579866977871456
"ENSRNOG00000060509"	"LOC102556339"	"ENSRNOT00000079320.1"	1.67851448806962e-06	3.44589697489774e-05	-1.95761939557996	0.408798352132907	6.46005059062146	10.0720542201033	9.4109717381212	10.9053096694871	20.1627552048747	20.2574315666245	0.843515476429142	0.777359241659413	1.96000325000831	1.71292302786171	6.00313029447478	14.1617044798422	2.25938625808667
"ENSRNOG00000019746"	"Paf1"	"ENSRNOT00000093723.1"	1.69114734768857e-06	3.46571530394462e-05	-2.96494517994563	0.619347043327212	0.789325409412871	0.672523933448711	1.75885246755869	0.465124471936477	1.03275209936673	2.06471386355288	0	0	0	0	0	1.1987933671727	0
"ENSRNOG00000055317"	"AABR07028908.2"	"ENSRNOT00000081689.1"	1.70165873400816e-06	3.48365404254543e-05	-4.17637349583552	0.872628947851116	2.23182927170275	0.240881160132832	0.452466036025265	0.660015829134892	0.878661300856081	0.918535042405315	0	0	0	0	0.218958171065952	0.630111873710877	0.0437916342131904
"ENSRNOG00000035627"	"Mir325"	"ENSRNOT00000053750.1"	1.71096916237436e-06	3.49909967913032e-05	-2.95312653196753	0.617179927467396	0.783416085423821	27.9855487562198	8.29694556950233	31.0220254627713	8.01915377949154	6.32745380994302	0	0	0	0	0	16.3302254755856	0
"ENSRNOG00000005982"	"C1d"	"ENSRNOT00000089875.1"	1.71675743490713e-06	3.50731774098501e-05	-3.62390238319572	0.757474134041463	2.3263174752419	2.99853046408749	2.9660909538754	2.34215921942199	5.01012608357605	5.07696950228042	0	0	0	0.387430977378096	0.624668675199737	3.67877524464827	0.202419930515567
"ENSRNOG00000038902"	"RGD1565641"	"ENSRNOT00000059467.4"	1.72582082010757e-06	3.52220300639255e-05	0.916700187737791	0.191652582822885	5.39334261259617	26.4929221425289	23.5976840433502	25.8862225325696	46.3979458731086	32.1300585789857	75.5388726531666	39.6696206441534	72.7636273381322	83.6910553779177	57.2472473792513	30.9009666341086	65.7820846785242
"ENSRNOG00000000926"	"Mrps17"	"ENSRNOT00000093534.1"	1.7673203518901e-06	3.60318800549445e-05	0.897289802522508	0.187782016648912	5.51259894372508	9.9994369289423	10.4457540944657	9.94903705026333	15.6103370116924	16.7915176607895	31.1063049286549	25.9706057242583	21.0220125491971	32.0606009400273	23.4012170617705	12.5592165492306	26.7121482407816
"ENSRNOG00000059308"	"AABR07047750.2"	"ENSRNOT00000086284.1"	1.81528487401807e-06	3.68580946192788e-05	-2.06405025482723	0.432445644083177	4.19883547240873	34.437392957863	32.4791687111835	47.8859632878518	64.7834869879102	71.1034111090363	2.6566471667722	3.79752883578484	4.44374475024774	2.47458387638435	27.149309737334	50.137884610769	8.10436287330463
"ENSRNOG00000057999"	"AABR07047744.1"	"ENSRNOT00000078109.1"	1.81528487401807e-06	3.68580946192788e-05	-2.06405025482723	0.432445644083177	4.19883547240873	34.437392957863	32.4791687111835	47.8859632878518	64.7834869879102	71.1034111090363	2.6566471667722	3.79752883578484	4.44374475024774	2.47458387638435	27.149309737334	50.137884610769	8.10436287330463
"ENSRNOG00000049433"	"rno-mir-344a-1"	"ENSRNOT00000053681.2"	1.81339151091065e-06	3.68580946192788e-05	-3.36975478554818	0.705976822414713	1.75625795890592	119.473930164249	45.1011724666859	111.518162016404	34.2184692507009	36.5293252875344	1.33593483441075	0	0	0.702028041220553	3.16428984350147	69.3682118371148	1.04045054382655
"ENSRNOG00000046685"	"Mir344a-2"	"ENSRNOT00000053682.2"	1.81339151091065e-06	3.68580946192788e-05	-3.36975478554818	0.705976822414713	1.75625795890592	119.473930164249	45.1011724666859	111.518162016404	34.2184692507009	36.5293252875344	1.33593483441075	0	0	0.702028041220553	3.16428984350147	69.3682118371148	1.04045054382655
"ENSRNOG00000038166"	"Ptgr2"	"ENSRNOT00000058095.3"	1.8234379302594e-06	3.69857415188848e-05	1.04813248037097	0.219639043442121	5.71043449203588	4.06409885116085	4.08715653822832	3.14574117217533	3.2069960711712	1.95480106689646	10.7141382411854	11.6546436916652	8.04260615027001	8.08325316259566	4.29145023312141	3.29175873992643	8.55721829576754
"ENSRNOG00000048509"	"Ubxn6"	"ENSRNOT00000089071.1"	1.84562736520506e-06	3.73975434522174e-05	0.802273152748352	0.168204412060034	6.33633236564977	7.17098696895316	7.74545126542087	7.7698968745284	11.0267169210849	13.584855713975	19.3922875976247	17.6119690780084	12.6583162309685	23.0714574772819	19.9102454630972	9.45958154879247	18.5288551693961
"ENSRNOG00000052176"	"AC115255.1"	"ENSRNOT00000084663.1"	1.88318069610868e-06	3.81195013838465e-05	1.49893651194984	0.314534398453864	4.02484459782099	0.750982902984223	0.633855816565097	1.09143596992836	1.16533017831559	1.03782683109732	3.02156005380149	4.73856725247069	9.1984575546774	1.90443915358912	2.65733718516742	0.935886339778118	4.30407223994122
"ENSRNOG00000056716"	"Zbtb20"	"ENSRNOT00000093179.1"	1.88798117881102e-06	3.81776765515286e-05	-3.48314357411498	0.730975913707565	1.7115322318693	0.607111591721563	0.777033398721079	1.00722968622848	0.454257324435485	0.201769804414274	0	0	0	0.199096590474281	0	0.609480361104176	0.0398193180948562
"ENSRNOG00000001515"	"Map3k20"	"ENSRNOT00000002068.5"	1.89091978575712e-06	3.81981217067776e-05	1.43287018416479	0.300723328199719	5.43561802798784	4.94350904047921	6.63713799730652	4.17922417025068	2.84273541524009	1.80936988033851	16.1982660794956	23.5744513463311	17.4504486160865	9.19731058063137	8.32083544511208	4.082395300723	14.9482624135313
"ENSRNOG00000009300"	"LOC103690017"	"ENSRNOT00000076281.2"	1.9020346986107e-06	3.83835250736948e-05	0.956215355692516	0.200735290477352	5.55248497889576	2.29385954631533	1.63732329593696	2.41541855264171	1.27429153453516	2.21467081778621	4.47444536509361	4.58287366204271	7.14528901029067	3.4219531173711	3.45388322964619	1.96711274944307	4.61568887688886
"ENSRNOG00000041612"	"AABR07056643.1"	"ENSRNOT00000063365.1"	1.91127912286079e-06	3.8530842703695e-05	-2.92950520389323	0.615108124377638	0.771605421386671	25.7634629422511	14.3417882869773	20.1079051495925	13.6759955845486	14.6065473853355	0	0	0	0	0	17.699139869741	0
"ENSRNOG00000003442"	"Adora1"	"ENSRNOT00000004602.2"	1.92358125258744e-06	3.87001113528175e-05	0.805021264718031	0.169076246029881	6.42779366094557	7.79076088246303	8.3108579951474	7.27217961652797	9.97001088172684	5.84118522484415	12.3912483028272	16.9323911694495	13.5195569063351	24.5453808695709	12.3358499691813	7.83699892014188	15.9448854434728
"ENSRNOG00000061929"	"AABR07047991.1"	"ENSRNOT00000079757.1"	1.92253537126846e-06	3.87001113528175e-05	-3.27817102887787	0.688488740981627	1.51976510801237	50.7489614878874	45.891858060543	88.1287913122286	57.7030401243129	48.9225951809547	0	0	0	0	7.59513330703068	58.2790492331853	1.51902666140614
"ENSRNOG00000013004"	"Akr1d1"	"ENSRNOT00000083672.1"	1.92797233334973e-06	3.8749115344819e-05	-2.87812769778091	0.604543106617154	4.93609397115728	6.1469707476169	5.46681816413309	6.36562256337609	15.3981306338211	18.1370438689853	0.115579226407576	0.150142381382026	0.399238026468812	1.34670211488555	1.78075569096153	10.3029171955865	0.758483488021099
"ENSRNOG00000060388"	"RF00279"	"ENSRNOT00000080960.1"	1.9301712804879e-06	3.87540063479521e-05	-2.93031880779238	0.615535452535607	0.772012223336245	21.4634677094289	11.6768413150909	19.695432463123	9.95201785541435	3.4410991358394	0	0	0	0	0	13.2457716957793	0
"ENSRNOG00000007345"	"Amot"	"ENSRNOT00000090918.1"	1.96079781861014e-06	3.93290793232764e-05	1.1646287799366	0.244802432298419	6.07636458229111	1.89872688044569	2.31823958577499	1.41373747342767	1.62202721359887	1.0142636373905	6.00192499470491	8.40657069628074	4.70726278589174	2.81935075484773	2.94158578679622	1.65339895812754	4.97533900370427
"ENSRNOG00000002069"	"Slc35a5"	"ENSRNOT00000093457.1"	1.99348060489674e-06	3.99441912509997e-05	-3.10309668881132	0.652722297438413	0.858401163845715	0.562230192376946	0.737926917203601	1.03889198162479	1.50598862550573	2.35250367987862	0	0	0	0	0	1.23950827931794	0
"ENSRNOG00000010489"	"Samd4a"	"ENSRNOT00000089226.1"	2.02540261486736e-06	4.05428319382086e-05	1.56016671369735	0.328395790877755	5.96256249463844	6.08910384708345	3.94070856992401	3.575079400885	1.08536494653281	1.89951315202739	12.6600872433464	18.8143716478625	12.6766283093119	9.51934045613965	8.52398106406297	3.31795398329053	12.4388817441447
"ENSRNOG00000045965"	"LOC103689949"	"ENSRNOT00000075465.2"	2.02774569811343e-06	4.05487754788233e-05	-3.56688182887239	0.750821440564704	1.60818906116047	0.253048577891335	0.295186369586534	0.610310099947278	0.330315120467007	0.573362060871111	0	0	0	0	0.0730757598982819	0.412444445752653	0.0146151519796564
"ENSRNOG00000019134"	"Htr4"	"ENSRNOT00000025871.7"	2.05042772344648e-06	4.09197645473706e-05	2.32703210347826	0.490067644828622	3.90399376985746	1.12689262740918	0.107064080879666	1.9837777178956	0.73880268447705	1.09055191696298	4.07008751979554	7.52893222406523	10.238324334764	6.51586964393626	7.60544777423253	1.0094178055249	7.19173229935871
"ENSRNOG00000004207"	"Eml5"	"ENSRNOT00000057601.5"	2.04892845370986e-06	4.09197645473706e-05	-0.855576069178527	0.180176751126826	5.80016131403318	3.3702614926527	3.55786926764744	4.13737222197119	3.78820779635112	3.70867723018569	1.26823702823774	1.2505677628598	1.70775675070658	1.44609355532139	1.38437306221426	3.71247760176163	1.41140563186795
"ENSRNOG00000062298"	"Rpl13a"	"ENSRNOT00000093589.1"	2.0854688667194e-06	4.15771997301594e-05	-2.92494102178409	0.616431040446269	0.7693233303321	1.79971061840413	0.801320954976997	0.523480963922749	0.543529884605456	0.540648582886297	0	0	0	0	0	0.841738200959126	0
"ENSRNOG00000001632"	"Brwd1"	"ENSRNOT00000002231.6"	2.09000523254444e-06	4.16257625058624e-05	-0.818947969542573	0.172609206970664	6.11458417517801	3.90797829441264	3.86761362270874	4.06311734578144	2.66553275010043	3.0104268960624	1.37253384313413	1.46006410516166	1.58683691620834	1.0804962057104	1.34615206249215	3.50293378181313	1.36921662654134
"ENSRNOG00000011962"	"Gin1"	"ENSRNOT00000076441.1"	2.10488137819133e-06	4.18799540879694e-05	-2.95149669278512	0.622273654524227	0.782601165832613	0.404021407378442	0.956784788019285	1.5963913501879	0.974573349412116	0.710788657015138	0	0	0	0	0	0.928511910402576	0
"ENSRNOG00000004464"	"Sel1l"	"ENSRNOT00000045870.5"	2.11885691131282e-06	4.20888574015006e-05	-0.779917782515778	0.16447908041568	6.97256070745726	11.7488246985317	11.760136107686	11.2953977730951	12.5344810146591	11.6074504721289	4.20869575272871	4.54734058182202	4.34867462488571	5.15525765074244	6.03822606891074	11.7892580132202	4.85963893581792
"ENSRNOG00000025791"	"Dync1li2"	"ENSRNOT00000076337.1"	2.11962858589582e-06	4.20888574015006e-05	-3.23527679357447	0.682307341781613	1.20555868518257	3.0875467749325	3.39116770117424	3.921161283215	5.46187137218776	2.26939931699824	0	0.266160513994741	0	0	0	3.62622928970155	0.0532321027989482
"ENSRNOG00000027296"	"Pcdhga6"	"ENSRNOT00000027019.2"	2.1243912372191e-06	4.21412023503213e-05	-1.47091081331719	0.310239137609271	4.16602022390694	2.59968542315063	2.76519925682238	2.51797013022649	3.32149376328918	2.88554657165832	0.183139585828531	0.494649216256077	1.08092122789488	0.891409648072468	0.650924087441297	2.8179790290294	0.660208753098651
"ENSRNOG00000041492"	"Mir1249"	"ENSRNOT00000063245.2"	2.14321787442017e-06	4.24721486173844e-05	-2.9107781934169	0.614162268841431	0.762241916148506	21.7804460006631	46.6634132325697	25.8408767488074	17.465086025224	18.4632665364424	0	0	0	0	0	26.0426177087413	0
"ENSRNOG00000019381"	"Eri3"	"ENSRNOT00000092886.1"	2.15233369294308e-06	4.26101866064465e-05	0.864274147129705	0.182391404420109	7.29655493014699	30.4817903265162	31.233008447146	30.0606370995556	58.0280185849407	53.3565677099244	71.9424839790257	63.2636858514323	74.3310236032704	118.54198832929	90.7340216730495	40.6320044336166	83.7626406872136
"ENSRNOG00000030572"	"Smc5"	"ENSRNOT00000067796.2"	2.16500352334866e-06	4.28182383455094e-05	-0.987109333257993	0.208366143702414	5.30810084783808	2.30782789156618	2.19336456914671	2.40785642502103	3.42976836332492	3.27150458464941	1.36748360229683	0.916503566785495	0.728746452600681	0.607155080241449	0.986559199505466	2.72206436674165	0.921289580285984
"ENSRNOG00000004201"	"Rims2"	"ENSRNOT00000050753.4"	2.18670421134057e-06	4.32043044428077e-05	1.17049997472867	0.247183075664543	6.08016450170878	2.27889824991435	2.71326851218317	3.58462312797702	1.0482553168607	1.64187968381841	6.52825118107075	4.24054418622016	8.92802140304336	4.8301926050308	6.32212122595747	2.25338497815073	6.16982612026451
"ENSRNOG00000050016"	"Gtf3a"	"ENSRNOT00000073026.2"	2.20689561125983e-06	4.35598110840001e-05	0.945006887645408	0.199642646153626	5.38718473716503	7.90197747066748	7.53575285823476	6.27385600489557	3.64746687197132	3.90050204355991	12.4542825764615	18.7470707563097	12.3756671578698	12.3113668859373	9.2804144474378	5.85191104986581	13.0337603648032
"ENSRNOG00000022054"	"Paqr7"	"ENSRNOT00000022713.3"	2.2753845284183e-06	4.48669603976772e-05	-0.941265305148406	0.19911317221282	5.32285914323168	6.39257306480531	10.5502783746364	6.47323401763476	7.32053510473598	7.2850256677453	2.53505757109518	4.06864965083365	2.60159985336996	1.44713391726126	2.96935502416243	7.60432924591155	2.7243592033445
"ENSRNOG00000033087"	"Cdh23"	"ENSRNOT00000048029.4"	2.28448536661632e-06	4.5001636690095e-05	1.49831392878834	0.317004376757703	3.98732420715522	0.130630330595432	0.121503275039651	0.137167785948927	0.159825059702186	0.151874590664145	0.631621337453162	0.649950351601783	1.00161828443749	0.365227184797474	0.385145549957978	0.140200208390068	0.606712541649577
"ENSRNOG00000016334"	"Ptbp3"	"ENSRNOT00000089251.1"	2.3130595568434e-06	4.55192663733522e-05	1.14643471203156	0.242685554110059	5.20569792445684	2.70568150911968	2.3106493884349	4.30888405386892	1.65685847061159	2.8196916647814	4.98375006082184	7.34635844724301	8.93104652635239	4.91250206654395	13.6134525928985	2.7603530173633	7.95742193877194
"ENSRNOG00000048836"	"AABR07003935.7"	"ENSRNOT00000071016.1"	2.32185887429994e-06	4.56471005079383e-05	-2.90303420393501	0.614635603134409	0.758369921407562	12.8651940908082	14.4962507322486	8.67982597367765	4.27996334282949	11.3547639963129	0	0	0	0	0	10.3351996271754	0
"ENSRNOG00000048394"	"Zfp560"	"ENSRNOT00000071010.2"	2.32573597372194e-06	4.5678007721752e-05	-1.33347349262376	0.282345672905713	4.30868221164072	2.14492300204308	1.82891627714592	1.89944899977315	3.13179380688337	2.33081930476769	1.04227453469028	0.558773246871638	0.492334733289343	0.496103921434296	0.257531432347442	2.26718027812264	0.5694035737266
"ENSRNOG00000012424"	"Adam23"	"ENSRNOT00000040525.2"	2.32978815354131e-06	4.57122889492358e-05	-0.787089145901889	0.166668381837445	6.53003133692878	16.9527596853648	16.1319664522129	21.3472032152842	14.9883659500975	19.2737231716976	6.63613071710641	7.57913758889453	7.632121108469	5.24738185477686	9.10690291813709	17.7388036949314	7.24033483747678
"ENSRNOG00000000804"	"Mrps18b"	"ENSRNOT00000081673.1"	2.35079081288923e-06	4.60787552314797e-05	-2.94833106727448	0.62455890562187	0.781018353077292	1.08624546673809	0.855372485876973	0.594399024820288	0.762231395334421	0.96143925071166	0	0	0	0	0	0.851937524696286	0
"ENSRNOG00000032706"	"Kcnk18"	"ENSRNOT00000064022.1"	2.37513596701663e-06	4.65099500576765e-05	-3.44705495497314	0.730530288680707	2.13797543299786	2.71203124211535	2.07705164900173	2.12568602492671	2.92370170141385	1.3992752127481	0	0	0.179673290457664	0.120796076836732	0.0559323250668039	2.24754916604115	0.07128033847224
"ENSRNOG00000016573"	"Dgat2"	"ENSRNOT00000081669.1"	2.38176962179726e-06	4.65478585751048e-05	-2.95249665737147	0.625794399499513	0.783101148125791	0.201983522772887	0.207365508737192	0.233427990972177	0.217611384006178	0.247566945676723	0	0	0	0	0	0.221591070433031	0
"ENSRNOG00000012379"	"Wdr18"	"ENSRNOT00000093204.1"	2.38128169828937e-06	4.65478585751048e-05	-3.05353140387444	0.647203430648692	0.833618521377273	0.675167462176524	0.818820173161621	0.837427401314951	0.364222005919143	1.2595464990333	0	0	0	0	0	0.791036708321108	0
"ENSRNOG00000061433"	"SNORD113"	"ENSRNOT00000079463.1"	2.3885036294347e-06	4.66334743098596e-05	-3.31344630073956	0.702384769658475	1.90266212675515	52.1255644371845	35.0305239452727	66.3425093494668	34.4492925764343	39.2285301485692	0	0	0	2.10085252533647	17.9374092052537	45.4352840913855	4.00765234611803
"ENSRNOG00000013934"	"St5"	"ENSRNOT00000064902.2"	2.39977619066778e-06	4.68074456402198e-05	-0.861516925308126	0.182661574743859	5.74033365544468	5.00293177964608	5.15615963361028	3.90877551518112	7.49330856254726	6.19077535672719	3.08488770899875	2.69327416666651	1.47671698707376	1.55902375028883	1.83710215387917	5.55039016954239	2.1302009533814
"ENSRNOG00000020938"	"Ppp1r15a"	"ENSRNOT00000079633.1"	2.40444710462329e-06	4.68524368459387e-05	-3.1236653059528	0.662345098716981	0.868685472416454	0.158784641409761	0.301051455419162	0.507434991965783	0.0877096596955467	0.453897863416305	0	0	0	0	0	0.301775722381312	0
"ENSRNOG00000005504"	"Pkp4"	"ENSRNOT00000059246.5"	2.45406172700512e-06	4.77722409077214e-05	0.797983819026491	0.169354651604335	7.92319621769109	21.1811445539175	19.3853212416341	23.4358178561614	16.531454176062	22.0587705161346	40.3781677090915	34.1435163934337	45.130323529335	39.5214339899548	43.4050306177274	20.5185016687819	40.5156944479085
"ENSRNOG00000060990"	"AABR07000382.1"	"ENSRNOT00000081586.1"	2.45678719078956e-06	4.77783628654335e-05	-3.28135427237426	0.696429262088988	1.25947329869086	1.29834013240377	0.618545847445394	0.862799123101498	0.979067008126297	0.668523838468914	0	0	0	0.0801047438548772	0	0.885455189909175	0.0160209487709754
"ENSRNOG00000017545"	"Mrs2"	"ENSRNOT00000023787.5"	2.46514835783853e-06	4.78939656934178e-05	-1.10778264661356	0.235148526207601	4.7166727661224	5.36059026046736	4.72771544893804	4.66508992797248	5.23473737907774	5.80862842620607	1.75220213247805	2.42384434379411	1.46617033393126	1.37119738534442	0.889435851047242	5.15935228853234	1.58057000931902
"ENSRNOG00000051878"	"AABR07059158.1"	"ENSRNOT00000089132.1"	2.48940395809987e-06	4.83178435236681e-05	-3.21721414257466	0.683206014333951	1.4819221753159	1.1129919145796	1.14077745711026	1.43044334458345	1.35882430918683	0.995932055719912	0	0	0	0	0.405139875428602	1.20779381623601	0.0810279750857204
"ENSRNOG00000038436"	"RGD1307100"	"ENSRNOT00000084349.1"	2.49298376527605e-06	4.83399797225788e-05	-3.00871938101377	0.63896991893967	2.65171123516132	11.7037678556317	14.7374061408558	13.5120580512305	5.1104208231588	4.95849145235331	0.338604605036355	1.73268553249046	0	0.191948671015199	0.777837385281593	10.004428864646	0.608215238764721
"ENSRNOG00000046332"	"AABR07004812.1"	"ENSRNOT00000074995.1"	2.50312785934588e-06	4.84892324424802e-05	-3.57355354579108	0.759058750679818	3.09145813399226	26.8860866267498	13.7358194016147	37.8865811892634	63.1503487121187	51.5205579741799	0.502872343828675	0.218075991724992	0	2.25289927928212	7.70453902249308	38.6358787807853	2.13567732746577
"ENSRNOG00000004067"	"Nrcam"	"ENSRNOT00000085979.1"	2.5240656499916e-06	4.88470790877768e-05	-0.894666445962518	0.190104755178406	7.12876775552253	29.8738373628731	23.0811145071195	31.0614117056048	16.8137274887619	14.6284424316078	8.15647566683185	9.69283526771411	11.304985350037	5.95516258296817	6.3353706231892	23.0917066991934	8.28896589814807
"ENSRNOG00000012269"	"Lpcat3"	"ENSRNOT00000017090.5"	2.54176825410603e-06	4.91416795040188e-05	-0.907968643433204	0.192989761658849	5.44493259517876	10.5020090019163	9.64594804748047	7.54644140376275	12.1964001979286	10.2555110143941	4.71818781756139	3.12914346687147	2.95569657881694	3.73280888552215	3.42630402712577	10.0292619330964	3.59242815517954
"ENSRNOG00000018126"	"Abca1"	"ENSRNOT00000024564.7"	2.57061639701512e-06	4.96509796682735e-05	-1.03434863100275	0.219959645516831	5.64791493069714	2.61622976906902	3.18103564651276	2.66934001382237	2.0215614806903	1.08339678042254	0.724871328089118	1.04012954417088	0.526170180102623	0.539662077045935	0.723441497395835	2.3143127381034	0.710854925360878
"ENSRNOG00000000233"	"Grm6"	"ENSRNOT00000000249.6"	2.60236865938316e-06	5.02153259230732e-05	-2.06147572773003	0.438617377716719	4.12561899589136	0.943087761487113	1.22825709753921	1.95397091003567	3.49372327608917	3.12448054673987	0.121337852501576	0.140680291289094	0.0967331407655279	0.576250777956978	0.42935063155886	2.14870391837821	0.272870538814407
"ENSRNOG00000028261"	"Tppp"	"ENSRNOT00000039166.6"	2.63712654132535e-06	5.08365142698876e-05	0.782947007067788	0.166682684367538	6.46204031081409	22.8481903998565	21.5769751158974	28.6487570513491	21.2962728401681	28.8487184826575	48.4158671645803	35.0091746205726	52.5461385862485	45.9149363887406	57.1472798152402	24.6437827779857	47.8066793150764
"ENSRNOG00000052620"	"Rack1"	"ENSRNOT00000089829.1"	2.64992780364923e-06	5.09346452811995e-05	-3.51640336404136	0.748769774376595	1.7951583852945	1.09065783051308	0.697089945689377	1.12079805923468	0.776761430135173	0.71126088138353	0	0.0635049317202674	0	0	0.0542154447901084	0.879313629391168	0.0235440753020752
"ENSRNOG00000049229"	"Pomp"	"ENSRNOT00000071796.2"	2.64604459522959e-06	5.09346452811995e-05	1.07762335399123	0.229450442415082	6.77460743289851	73.7258697566561	72.3880118954071	72.8766451481419	48.4146352598767	43.2081269632516	200.672253039015	169.03481444779	199.240162458045	163.445922235475	80.0280352125013	62.1226578046667	162.484237478565
"ENSRNOG00000055749"	"RF00017"	"ENSRNOT00000088933.1"	2.64977365836449e-06	5.09346452811995e-05	1.83259187590741	0.39022426889227	5.54850582963602	58.393555046163	37.6114713714111	73.5429382255177	14.1509653800968	40.7564674086813	187.749264679621	288.301052351902	271.242751891344	106.060913653259	223.07737838357	44.891079486374	215.286272191939
"ENSRNOG00000054121"	"AABR07061178.1"	"ENSRNOT00000085062.1"	2.65351896794529e-06	5.09542494067557e-05	0.926651029171105	0.197329232391637	6.12601522469701	29.0872861827968	27.0768049881172	34.0262637373952	13.2667898405379	19.2249817767569	43.359965459747	57.5243124470072	64.7944751134829	52.6351505827309	43.1476526147411	24.5364253051208	52.2923112435418
"ENSRNOG00000001878"	"Klhl22"	"ENSRNOT00000091675.1"	2.68019862642859e-06	5.14167436398212e-05	-3.64547360827743	0.776637477705041	1.78373853507108	0.465309536877017	0.779709776595543	0.690283855857073	0.577240679681397	1.54591086458981	0	0	0	0	0.232133003838269	0.811690942720168	0.0464266007676538
"ENSRNOG00000020525"	"Col5a3"	"ENSRNOT00000027897.4"	2.69505249588643e-06	5.16516975928254e-05	-1.0140299371417	0.216082570386185	5.02753120486852	2.22368987054452	2.40480988489151	1.66254985029835	2.20219907221973	1.64973300872845	0.816233685344806	0.976905410413731	0.350680337669629	0.834394623894992	0.481171441347664	2.02859633733651	0.691877099734164
"ENSRNOG00000000931"	"Sfswap"	"ENSRNOT00000093391.1"	2.72518192287748e-06	5.21786764885633e-05	-3.17650567151212	0.677218949914972	1.15482287850204	1.65616301870133	1.79181064588297	1.26749759046987	1.41642859983264	0.989288972054511	0	0	0	0	0.113881591299641	1.42423776538826	0.0227763182599282
"ENSRNOG00000016088"	"Cdk10"	"ENSRNOT00000021607.8"	2.74518061295761e-06	5.25108534816419e-05	0.870346830342785	0.185613846398982	5.66892082296206	5.8790841069953	4.74184166766015	5.02607742225015	6.42655382648004	8.55292938124112	11.3774271329245	9.62207470815629	11.6400276117459	18.8912214375627	13.7542643468195	6.12529728092535	13.0570030474418
"ENSRNOG00000049235"	"Arl16"	"ENSRNOT00000071433.2"	2.78057528604977e-06	5.30854146855957e-05	0.862189615372834	0.18397710091428	5.62774521839285	11.3621125382489	10.6622188305243	11.2477812116226	11.0326333568083	14.0563769468217	25.5429269476745	24.1246333606517	22.1304494036679	23.8753032738184	25.8593322368261	11.6722245768052	24.3065290445277
"ENSRNOG00000059898"	"LOC100909599"	"ENSRNOT00000078330.1"	2.77950177199268e-06	5.30854146855957e-05	-3.47835008867153	0.742210248295578	1.51877475034351	1.14937212666002	0.327193417622265	0.0857375071148489	0.337385924992525	0.386088370670892	0	0	0	0.0553921328543666	0	0.45715546941211	0.0110784265708733
"ENSRNOG00000045762"	"AABR07018048.1"	"ENSRNOT00000075662.1"	2.78467626843101e-06	5.31125405307964e-05	-3.19749655113531	0.682337178995407	1.16531831831363	8.96219494845391	12.491427294565	14.7227216515521	41.2374898661435	20.9895934514068	0	0	0	0	1.50213081687591	19.6806854424243	0.300426163375182
"ENSRNOG00000025889"	"Gnas"	"ENSRNOT00000035916.5"	2.81006933644217e-06	5.35453308079562e-05	1.29911560212805	0.277337814024523	5.40250665496331	4.08157393714907	1.92780250492942	3.47004153757046	3.95470073707318	6.606828433265	8.56343176393216	7.35365449428359	21.4042065761499	14.3468934540295	13.6535537718321	4.00818942999743	13.0643480120454
"ENSRNOG00000061691"	"LOC102550455"	"ENSRNOT00000086613.1"	2.83013699837891e-06	5.38759124849902e-05	-3.20932745915585	0.685346992684851	1.35323819447713	0.627930724253795	0.588859678808976	0.546672196331612	0.422559671955939	0.58227996508686	0	0	0	0	0.106780269684568	0.553660447287436	0.0213560539369136
"ENSRNOG00000061409"	"RF00155"	"ENSRNOT00000085510.1"	2.8498023322559e-06	5.41982080789972e-05	-2.93759348773086	0.627508780016247	0.775649563305486	24.0218293792524	28.6161438353524	31.7258745613461	39.3180895680849	14.4297408153666	0	0	0	0	0	27.6223356318805	0
"ENSRNOG00000043192"	"Hacd1"	"ENSRNOT00000063911.2"	2.85792499938586e-06	5.43005749883314e-05	1.19363923757024	0.255008891471315	4.4631599624242	5.13006114628224	7.50039397528598	3.36035979366219	3.06919528189505	3.26136703367549	18.8082021122306	13.1607963961987	10.7524400931399	12.4578507172556	8.15439240947499	4.46427544616019	12.66673634566
"ENSRNOG00000061918"	"AABR07069008.3"	"ENSRNOT00000077575.1"	2.87351813928016e-06	5.45445488181178e-05	-3.20787891162942	0.685494093677762	1.54269681152167	0.566834063440153	0.622087500148251	0.463784907049546	0.672790702698303	0.638305288849609	0	0	0	0	0.262180652474267	0.592760492437172	0.0524361304948534
"ENSRNOG00000000007"	"Gad1"	"ENSRNOT00000000008.4"	2.89292644425301e-06	5.48604051155616e-05	-0.774479833748164	0.165548019290685	7.36748777244861	34.3038086473434	35.4744877617936	44.724380784031	31.2757462336576	32.390614754185	14.2812391460714	14.7532108707721	21.0044420740558	10.7310220707942	13.5048777225269	35.6338076362021	14.8549583768441
"ENSRNOG00000014599"	"Dhx36"	"ENSRNOT00000019824.6"	2.92319140158866e-06	5.53813422612644e-05	-0.767904542735522	0.164217465379665	7.04697082766865	14.3601025783351	13.9294539528227	14.2032131688467	15.587180828721	13.598935058845	4.85226952380274	5.51997197823591	6.50122596190567	6.36244567892322	6.5795170045301	14.3357771175141	5.96308602947953
"ENSRNOG00000056770"	"RF00411"	"ENSRNOT00000083475.1"	2.92852285277807e-06	5.54293575678156e-05	-2.8566547359455	0.610948477770356	0.735180187412806	25.2865702104387	12.4530871947078	19.1115206029166	54.7578312173025	24.9090954260152	0	0	0	0	0	27.3036209302762	0
"ENSRNOG00000048545"	"LOC100910483"	"ENSRNOT00000017253.7"	2.94060999846e-06	5.55520193894012e-05	2.31403286518594	0.494988228179079	4.75717016247475	2.92931352609872	4.56390629380037	3.13993661838231	0.489690453949871	0.536345842619341	15.7559183968788	22.7043133667659	17.5651258285239	8.88447649717132	12.516962425758	2.33183854697012	15.4853593030196
"ENSRNOG00000059749"	"SNORD113"	"ENSRNOT00000092167.1"	2.93966866384936e-06	5.55520193894012e-05	-2.8611520609226	0.612012346709708	0.737428849901354	16.1804333693857	3.77233135283234	26.7659118469171	12.6127157533914	6.36079519418745	0	0	0	0	0	13.1384375033428	0
"ENSRNOG00000019423"	"Dvl1"	"ENSRNOT00000026439.5"	2.9701005717156e-06	5.60556981235125e-05	0.792719606252212	0.169642739089254	6.22871163500791	6.01740949400551	4.97303770104933	5.17267322704374	5.18090842169519	7.72663860051338	10.4502195231265	9.45129492763183	12.9208613332421	10.8425139345858	13.2262256630208	5.81413348886143	11.3782230763214
"ENSRNOG00000020153"	"AABR07066830.1"	"ENSRNOT00000027293.7"	2.9845336166688e-06	5.6237640941672e-05	1.28917545237238	0.275943534693787	4.28695836473432	2.49170142771866	2.56079824249923	1.3326951460504	3.9835436120704	2.8821507903578	6.28688813970477	8.45331506327263	6.57375546131627	13.35260460462	7.34955374327493	2.6501778437393	8.40322340243772
"ENSRNOG00000035610"	"Mir377"	"ENSRNOT00000053733.3"	2.98541647427153e-06	5.6237640941672e-05	-2.84699878854849	0.609398139647324	0.730352213714299	12.6787008158376	14.9817935040315	24.9771003462981	35.7521769933584	43.1198007393025	0	0	0	0	0	26.3019144797656	0
"ENSRNOG00000047466"	"Bdnf"	"ENSRNOT00000083289.1"	2.98991035537101e-06	5.62688067544038e-05	-4.32724341036702	0.926304731662558	2.39038464640072	1.32732877811577	1.21962378183111	1.68937959673592	0.900340933574658	0.994487672670259	0	0	0	0	0.557679594300026	1.22623215258554	0.111535918860005
"ENSRNOG00000053726"	"SNORD116"	"ENSRNOT00000078749.1"	2.99558810053629e-06	5.63221720951876e-05	-2.84745697027196	0.60958735690456	0.730581304576036	13.9913338978826	4.73856920005333	19.6716261303598	5.69144778135503	9.20514598633809	0	0	0	0	0	10.6596245991978	0
"ENSRNOG00000000439"	"Ager"	"ENSRNOT00000089721.1"	3.01208175953558e-06	5.65752218764731e-05	-3.22154288600118	0.689838727426955	0.917624262440647	0.22456114440897	0.322417922416003	0.366750335081011	0.33669042626877	0.77241854963351	0	0	0	0	0	0.404567675561653	0
"ENSRNOG00000010050"	"Stard9"	"ENSRNOT00000079109.1"	3.01475673924184e-06	5.65752218764731e-05	-1.76996735714775	0.379023267059321	5.01342198489255	0.987776440935549	1.11595661334311	1.24664845139746	1.37392003888843	1.47600889889601	0.1824191142585	0.284150046919086	0.120689807288762	0.216800185363951	0.161325730023066	1.24006208869211	0.193076976770673
"ENSRNOG00000018454"	"Apoe"	"ENSRNOT00000080453.1"	3.055455522706e-06	5.7284732349541e-05	-3.73491499642341	0.800272101949753	1.94068199259791	1.5766380029527	1.65904495425648	0.781830508765254	2.55532740328851	3.02690736827187	0	0	0	0	0.796572062128076	1.91994964750696	0.159314412425615
"ENSRNOG00000018932"	"Ccdc124"	"ENSRNOT00000025626.5"	3.06046437305884e-06	5.73244068817646e-05	1.01637054194715	0.217791214335156	5.80594545784957	7.99945624800279	9.34791360247467	8.61470938851638	4.10426885675688	4.61601652542699	14.3061646110233	20.9634835619221	22.8331175879016	14.0955910798324	11.278244270147	6.93647292423554	16.6953202221653
"ENSRNOG00000058832"	"AABR07063873.1"	"ENSRNOT00000082019.1"	3.0779784064273e-06	5.75980151842963e-05	-2.86486262534282	0.614046523888875	0.739284132111466	0.619984968761978	0.534980124665798	1.06935996805052	0.404632248342283	1.04335390811348	0	0	0	0	0	0.734462243586812	0
"ENSRNOG00000055314"	"Msrb1"	"ENSRNOT00000090552.1"	3.0812872669921e-06	5.76055375188514e-05	0.911590298694757	0.195396929474328	5.32440946467936	10.6379327811975	9.29310273729785	8.27682116999901	8.70947088814645	8.13456207337058	25.8315493372687	20.6697175866369	19.3086891394686	20.112301417696	14.2327081342017	9.01037793000228	20.0309931230544
"ENSRNOG00000016870"	"Pcif1"	"ENSRNOT00000023202.5"	3.10288835189583e-06	5.79547016677848e-05	0.835609807322934	0.179165887555519	5.78020434543651	2.58021374587863	2.06386196389795	2.95153872082328	2.44378234468378	3.16621467466585	4.01832798686299	4.46007830146454	5.92627595467719	6.11109659409529	6.90975566209035	2.6411222899899	5.48510689983807
"ENSRNOG00000061006"	"AABR07017208.2"	"ENSRNOT00000090768.1"	3.16082894833084e-06	5.89813062797291e-05	-3.31308309395644	0.710949473230972	1.72979151881128	1.76486339123951	1.13802214155812	1.59326917995909	1.73388708096803	1.1474115284766	0	0	0	0.065099767799605	0.241118037385613	1.47549066444027	0.0612435610370436
"ENSRNOG00000016619"	"Use1"	"ENSRNOT00000022650.7"	3.16582641486695e-06	5.90189859486533e-05	0.918750825737358	0.197167103902022	5.62171818627543	7.8245093867672	8.1386951677389	6.33283527154	13.927135612037	15.1774146541611	20.2676371269737	21.2401039926824	14.7679885598312	24.1124447373113	29.7413112463544	10.2801180184488	22.0258971326306
"ENSRNOG00000011854"	"RGD1563986"	"ENSRNOT00000015921.6"	3.28662638246517e-06	6.12134163734138e-05	1.01535641686576	0.218260328391301	5.98813072869416	9.60469726155276	11.656201080934	8.8261200654382	6.97229148094551	5.00188879084175	20.8287463753265	25.3844953659984	23.8436018075304	22.6805587950225	10.6683113394542	8.41223973594244	20.6811427366664
"ENSRNOG00000053965"	"SNORD113"	"ENSRNOT00000091615.1"	3.32246869985431e-06	6.18228753286507e-05	-3.43103634740781	0.737888011764962	2.77733937679543	224.138002806391	124.082259609333	149.116690971232	58.5263178334829	35.2669951814778	31.3799190005223	1.8533013700811	2.86113745768782	0	1.59783466568326	118.226053280383	7.53843849879489
"ENSRNOG00000020140"	"Pigq"	"ENSRNOT00000027353.4"	3.33016133610872e-06	6.19078866769855e-05	1.0166677590617	0.218669767077808	6.85780297426158	7.88159467442074	7.25131806196689	7.60515753593959	13.0215540708469	13.390437805773	15.1033557850118	17.5278293477141	23.3689219617063	37.0949358413685	29.8590283933502	9.83001242978943	24.5908142658302
"ENSRNOG00000026646"	"Ndufs5"	"ENSRNOT00000036389.5"	3.34645882064413e-06	6.21525533727317e-05	1.30287476745541	0.280289254507491	6.35534313797215	49.3369223012044	53.6554940964169	60.9106475913575	30.4500762294439	29.9893472303908	177.764124380515	174.335377124027	201.417821005985	111.824585842879	68.5974706669606	44.8684974897627	146.787875804073
"ENSRNOG00000020315"	"Taf13"	"ENSRNOT00000027530.5"	3.37084960709568e-06	6.25469350784785e-05	1.10088582803766	0.236911467207177	5.5704337245409	7.54009477708795	10.0692988727961	6.58025790004821	4.05623506997001	3.88660878562609	21.7300435784593	21.2198488878507	18.0484624105706	10.4743240049783	12.2474399994088	6.42649908110567	16.7440237762535
"ENSRNOG00000033980"	"Wfdc11"	"ENSRNOT00000067008.3"	3.38199577942936e-06	6.26364582812633e-05	-1.61208859796697	0.346973565545876	3.85981716616957	3.84283028388255	3.64754391487438	4.88971246480067	6.6459396099064	5.85870032839277	1.13517600009463	0.565163986674121	0.800120442952192	0.955675043366939	0.84291087086142	4.97694532037135	0.859809268789861
"ENSRNOG00000051456"	"AABR07013729.1"	"ENSRNOT00000085930.1"	3.38135872604235e-06	6.26364582812633e-05	-2.79798872615892	0.602212559115775	3.12937930654241	0.669199208322704	0.556946646967804	0.599698895544528	1.51463518119871	1.57519402278378	0.0247772886254693	0.014216308066105	0.0207626508542233	0.145421667803141	0.124260618411759	0.983134790963505	0.0658877067521395
"ENSRNOG00000009209"	"Slitrk1"	"ENSRNOT00000012195.5"	3.38757277053134e-06	6.26811667540798e-05	-0.762753236449986	0.164181164889197	6.98839128563808	19.6139062992424	16.6849079321291	22.7750097940915	18.6723804714479	18.6001514426085	7.39244059876513	5.45196687566289	11.20366719096	7.17707416560365	9.87972365921685	19.2692711879039	8.2209744980417
"ENSRNOG00000052279"	"LOC103692169"	"ENSRNOT00000084616.1"	3.40027748740162e-06	6.28575550073114e-05	0.947750013198949	0.20403530245786	5.19669246409288	11.0415305590929	13.8783893247921	13.3652675597776	11.3171648921643	13.1192437058402	26.5085430958986	23.0789535322538	35.4217399489452	33.501783881232	24.2319254652564	12.5443192083334	28.5485891847172
"ENSRNOG00000060305"	"AABR07008462.1"	"ENSRNOT00000077266.1"	3.40882370646702e-06	6.29568121072292e-05	-3.03421114225704	0.65328964402004	0.823958390568574	0.254674655532216	0.156697237311065	0.233920574124318	0.261571777786805	0.0753002044072399	0	0	0	0	0	0.196432889832329	0
"ENSRNOG00000005642"	"Frs2"	"ENSRNOT00000007472.6"	3.43040146660481e-06	6.32963369308264e-05	1.51770118883596	0.326864762980471	7.56853999031948	6.05808034410118	6.37729483053643	4.95228032556784	8.6106623886396	7.6815283818731	15.2266922726455	16.5937421835973	17.6507585982416	65.1761787202182	48.6597992046661	6.73596925414363	32.6614341958737
"ENSRNOG00000047946"	"AABR07031734.15"	"ENSRNOT00000070795.1"	3.43901610273882e-06	6.33962624260235e-05	-2.85457186722496	0.614852956142591	0.734138753052535	13.7622638248877	6.22604320952878	6.13934301528325	19.598157677379	9.71877573736069	0	0	0	0	0	11.0889166928879	0
"ENSRNOG00000045605"	"Uxs1"	"ENSRNOT00000070920.2"	3.45446958192134e-06	6.36219551161109e-05	0.848151007207521	0.182721691851312	5.6783046535409	5.69565821474278	5.00059117401221	5.38289922736857	5.19916339618691	3.43391612542913	11.142479321439	10.682281470368	12.4113346897056	9.13683343946231	7.85560059315294	4.94244562754792	10.2457059028256
"ENSRNOG00000047028"	"Mmp24"	"ENSRNOT00000092194.1"	3.4578351769892e-06	6.36248093801253e-05	1.41376182324957	0.304587445171867	5.65135793326163	5.50316447485742	5.65439310319977	6.38096743221448	2.33118207737205	2.59080765289829	18.5595758886111	22.5014481319698	23.5007556307142	8.92561504341023	8.99456777260048	4.4921029481084	16.4963924934612
"ENSRNOG00000042499"	"LOC100364435"	"ENSRNOT00000022846.5"	3.4742752462189e-06	6.38680079353618e-05	1.69266760581626	0.364753219810442	9.14794144469966	1013.73862039968	901.15577122818	1009.12570405778	392.391507489608	407.887741479719	4963.53938596849	4110.95939539177	4680.76797714295	2460.44542164775	1377.40678908682	744.859868930993	3518.62379384756
"ENSRNOG00000047143"	"Fkbp1b"	"ENSRNOT00000071784.2"	3.51412962252191e-06	6.45407847354185e-05	0.917785353146036	0.197874234124485	5.26906360533823	5.74515355641902	5.78732420978561	5.5372304595041	7.98489459190797	6.06818982236762	11.5430759206354	14.9655361990746	13.2563985592084	21.4157109879641	9.76227362199488	6.22455852799686	14.1885990577755
"ENSRNOG00000026212"	"Micall1"	"ENSRNOT00000036357.6"	3.53236783456676e-06	6.48156790533422e-05	1.11628451859649	0.240726138022465	5.89262062985431	1.11402760726983	1.34698518487287	1.02840185185161	1.51442465968057	2.42187177197382	2.67157926650334	3.43053156862186	2.67042668206073	5.31710909399887	6.57705628856451	1.48514221512974	4.13334057994986
"ENSRNOG00000033147"	"Dear"	"ENSRNOT00000042146.4"	3.54339180957789e-06	6.49578126645745e-05	-3.32454366542502	0.717035632201979	1.618409664805	0.307085885983115	0.249867532070349	0.510595982619835	0.435945042234945	0.569949887221414	0	0.0211844179084061	0	0	0.0362572782589114	0.414688866025932	0.0114883392334635
"ENSRNOG00000050046"	"AABR07018226.1"	"ENSRNOT00000072409.1"	3.55330168211063e-06	6.50792785900059e-05	-3.16204567672999	0.68207312829993	1.34594980762734	14.0868032054765	16.2453448487397	23.3471426412878	17.7966426875126	32.0184482135097	0	0	0	5.31105882063178	0	20.6988763193053	1.06221176412636
"ENSRNOG00000012440"	"Msra"	"ENSRNOT00000016616.6"	3.62257931879546e-06	6.62868461316433e-05	0.852572847967488	0.184063943129711	5.63147581216366	18.1592783184721	17.002571454394	20.8192333305848	20.0991106920329	16.2016468073777	36.267772114437	35.3916348320339	41.3475656025536	43.9826675962129	32.4630786362832	18.4563681205723	37.8905437563041
"ENSRNOG00000055579"	"Tmbim6"	"ENSRNOT00000088176.1"	3.69116467201483e-06	6.74795298019538e-05	-3.73897942607593	0.807894382888915	1.9639789493594	1.94363930573577	2.81463750543531	1.9769666091837	3.62864233442518	5.20040037033613	0	0	0	1.41544758331953	0	3.11285722502322	0.283089516663906
"ENSRNOG00000058932"	"Zfp202"	"ENSRNOT00000084416.1"	3.70568764653394e-06	6.76825917892748e-05	-3.74385370168424	0.809089800880193	1.72885426698665	0.460623854398092	0.465125164376142	0.505026387129236	0.631014459216934	0.474788041490091	3.89671583155562e-07	4.10174194652287e-07	0	0.0887945354474529	2.96101713139849e-07	0.507315581322099	0.0177591262789888
"ENSRNOG00000030847"	"AABR07012868.1"	"ENSRNOT00000046960.2"	3.78178412886936e-06	6.89453689805006e-05	-2.80879536981834	0.607566142817306	0.711250504349227	1.75126902929873	0.569832180784646	1.19631314413063	2.634629222744	2.63890351271047	0	0	0	0	0	1.7581894179337	0
"ENSRNOG00000059001"	"AABR07017737.1"	"ENSRNOT00000085402.1"	3.78036120921494e-06	6.89453689805006e-05	-3.27923608708109	0.709314467622513	1.84381956966241	1.18576224830998	1.29451482011233	1.8381776117952	4.44363910985606	5.87562731807405	0	0	0	0.292242071416417	0.270359633333069	2.92754422162952	0.112520340949897
"ENSRNOG00000006340"	"Memo1"	"ENSRNOT00000008687.5"	3.82424845033069e-06	6.96554517832751e-05	0.848555319681095	0.183641670479542	5.64924801487745	7.68452165633291	8.52263240298211	6.64566796259675	9.22473607015282	6.56747374434741	18.3069223183573	16.5250845264774	13.7700878748385	16.7251717947757	14.4450255257772	7.7290063672824	15.9544584080452
"ENSRNOG00000046299"	"Atp5pb"	"ENSRNOT00000075932.1"	3.84017787704661e-06	6.98172522838833e-05	-3.25258297654415	0.704045165800464	1.77467753738201	5.59245979729316	4.37784462543437	3.54686282537852	2.56218906037903	2.31870397952626	0	0.0778449595604407	0	0.0809439134405243	0.525534796735748	3.67961205760227	0.136864733947343
"ENSRNOG00000016000"	"LOC100911417"	"ENSRNOT00000077057.1"	3.84017787704661e-06	6.98172522838833e-05	-3.25258297654415	0.704045165800464	1.77467753738201	5.59245979729316	4.37784462543437	3.54686282537852	2.56218906037903	2.31870397952626	0	0.0778449595604407	0	0.0809439134405243	0.525534796735748	3.67961205760227	0.136864733947343
"ENSRNOG00000013987"	"Sbno2"	"ENSRNOT00000068197.3"	3.88090779509966e-06	7.0364089456075e-05	0.849272451791477	0.183918345614534	5.64651290942764	1.98439986279201	2.10481019656401	1.71060795592472	1.78402391675801	1.71246953235355	2.96701645771884	3.42723891068034	3.7619844981812	4.65358050801434	4.85842257507492	1.85926229287846	3.93364858993393
"ENSRNOG00000028335"	"Fat4"	"ENSRNOT00000038703.7"	3.87489692372918e-06	7.0364089456075e-05	-0.842649041633633	0.182471266820818	8.61618400819897	31.0822169446816	24.8408853181568	31.366110522875	19.7580237764039	18.7363819534	9.37027393820006	8.41803675617575	11.7827955895352	9.54022191510778	8.48609157268171	25.1567237031035	9.5194839543401
"ENSRNOG00000054578"	"AC141344.1"	"ENSRNOT00000089733.1"	3.88036244126604e-06	7.0364089456075e-05	-2.83993588545283	0.615012307305847	0.726820762166469	1.23750109077346	0.986946117848303	1.15431646711778	2.23188505491272	2.24119686738126	0	0	0	0	0	1.5703691196067	0
"ENSRNOG00000004645"	"Galnt5"	"ENSRNOT00000006319.3"	3.90848981696263e-06	7.07993991798432e-05	-2.74391194962542	0.594410520387749	3.0333132235699	0.467015881735157	0.410330585034946	0.469831044939136	0.787170853218387	0.875159826110236	0.00885452158823218	0.0592607843014943	0.085120217392633	0.02713636586823	0.016774300818199	0.601901638207572	0.0394292379937577
"ENSRNOG00000014811"	"Cyhr1"	"ENSRNOT00000092930.1"	3.97118066987837e-06	7.18693035022645e-05	-3.33718486026738	0.723448529340043	1.49943306654553	1.58880686183519	1.31046461591845	1.23569636050106	4.15127568162748	3.56485120358671	0	0	0	0	0.522821009040024	2.37021894469378	0.104564201808005
"ENSRNOG00000050741"	"Rbm4"	"ENSRNOT00000067093.3"	3.97595202118893e-06	7.18900010984498e-05	1.02224501666155	0.221618425864818	6.1788692857128	20.2636115322902	17.1023850959434	17.5587687377673	20.368792166959	19.7922108533569	66.123659056327	50.7450228930411	76.7919654852995	24.9153033788464	33.7536150705858	19.0171536772634	50.46591317682
"ENSRNOG00000030285"	"Epha3"	"ENSRNOT00000090197.1"	3.99556839798084e-06	7.21788322176722e-05	-1.02744372946655	0.22279488451346	5.09928407443165	2.43832146123958	2.63448672049602	1.75923245503866	2.2479941905044	1.90634166051059	1.01180813324579	0.784623812779463	0.340168306486453	0.549867710150987	1.06070821067156	2.19727529755785	0.749435234666851
"ENSRNOG00000051119"	"AABR07039029.2"	"ENSRNOT00000076605.1"	4.01397984485093e-06	7.24453903327967e-05	-3.13266241897311	0.679439456732172	1.14840925488474	2.6990615705029	1.59941933812456	2.51484765762003	0.778586189850652	0.834995253970713	0	0	0	0.135415152381575	0	1.68538200201377	0.027083030476315
"ENSRNOG00000043382"	"AABR07055700.1"	"ENSRNOT00000071699.2"	4.10248897551332e-06	7.39754540743836e-05	-3.12609215045867	0.678682097964366	1.12961611797532	1.11344697575995	0.775145788537464	0.306152514090485	1.21261932069779	1.78883254181836	0	0	0	0	0.0767238827862389	1.03923942818081	0.0153447765572478
"ENSRNOG00000017583"	"Mapkap1"	"ENSRNOT00000023889.6"	4.1211492927438e-06	7.42443777584581e-05	0.754943366781444	0.163933622021906	6.91134369207145	9.74012671857415	9.4591420037182	10.1465897502106	10.4535208499471	8.47563485325992	17.0417164722899	17.671221264476	16.2978813193183	21.6066611995906	19.1155284136956	9.65500283514199	18.3466017338741
"ENSRNOG00000059179"	"AABR07014125.2"	"ENSRNOT00000084593.1"	4.14330450141833e-06	7.45757178061826e-05	-3.42815490822852	0.744593674239366	3.3263172404137	4.18132566655502	2.93282977812745	3.88856378170593	5.98533917162353	7.37256189438212	0	0.0417058187010224	0.531672577691427	0.155645858578278	0.614837952542077	4.87212405847881	0.268772441502561
"ENSRNOG00000007865"	"Ephb1"	"ENSRNOT00000010634.5"	4.16766061712023e-06	7.49460348906276e-05	0.78180207087305	0.169852063514998	6.20244436555833	3.51775768239022	3.61043045172747	2.85120795391778	4.07986817589619	3.53993855859993	6.93042835519782	9.89428718861136	4.56282941134979	8.17606164869869	5.7569638352933	3.51984056450632	7.06411408783019
"ENSRNOG00000039871"	"RGD1306063"	"ENSRNOT00000061214.4"	4.18067725227505e-06	7.51119502342109e-05	1.06113001362916	0.230570570654125	5.63115025913471	8.08670048599753	8.19120869508981	6.850776326187	13.6612194814666	8.65605952195928	16.2845136505252	17.6872595732792	20.7172551028447	49.4434686484339	19.8720725360253	9.08919290214004	24.8009139022217
"ENSRNOG00000032745"	"Slc17a3"	"ENSRNOT00000091749.1"	4.21669179160971e-06	7.56903815528348e-05	-3.30798850760773	0.719064541240353	1.61965283512019	0.315128639237169	0.345499635005882	0.393751248832292	0.976624593393376	1.18478015080031	0	0	0	0.058142872418666	0.0257534770318557	0.643156853453806	0.0167792698901043
"ENSRNOG00000060508"	"AABR07028523.1"	"ENSRNOT00000091646.1"	4.22267612462934e-06	7.57292061192575e-05	-3.23475102568471	0.703189907756484	1.80225642593447	2.87609888653187	2.65795879527259	2.81843703677693	1.93474396820591	1.75442642386505	0	0	0	0.207281749116938	0.383497812582243	2.40833302213047	0.118155912339836
"ENSRNOG00000050543"	"Safb"	"ENSRNOT00000089164.1"	4.24414178536971e-06	7.60453505973523e-05	-1.16193907076319	0.252647418669794	4.93971664259858	3.49224484325512	3.57668821497535	3.76616069553643	4.10507682385337	4.50493925494839	0.74917727553475	1.68910936623738	0.682094477890466	1.21987072781225	1.35323980102077	3.88902196651373	1.13869832969912
"ENSRNOG00000051750"	"SNORD116"	"ENSRNOT00000086621.1"	4.26327413255288e-06	7.63191540061431e-05	-3.04313800632027	0.661822715435597	1.03830472051468	13.356447264902	22.5420834258611	27.6691307484746	11.48967985648	7.42847826821665	0	0	0	1.08399171924405	0	16.4971639127869	0.21679834384881
"ENSRNOG00000043539"	"AABR07053681.2"	"ENSRNOT00000068806.2"	4.27979510888035e-06	7.65457578273302e-05	-3.43455874743385	0.747079998673988	1.43369750486171	49.1554158561141	83.3834520996514	57.7070661375682	75.183377640403	60.314528792554	0	0	0	0	3.21067015828166	65.1487681052581	0.642134031656332
"ENSRNOG00000018122"	"Tspan17"	"ENSRNOT00000086380.1"	4.28746922069048e-06	7.66138661374421e-05	1.55413905832146	0.338081425661242	6.07441356147535	9.07663191502342	9.25933890447443	5.54732530737032	19.9721225701586	10.9043500634668	26.1244399057447	33.7274113233844	25.5102947232477	109.765730515032	53.1270187996676	10.9519537520987	49.6509790534153
"ENSRNOG00000030809"	"AABR07034293.1"	"ENSRNOT00000048551.2"	4.38673417348791e-06	7.83170370414504e-05	-3.29755482985701	0.718082984083416	1.49090354429239	2.08685308381876	5.0999969007351	4.03791226311568	1.99530627814457	1.70663217332126	0	0	0	0.160982506382151	0.14916362961752	2.98534013982707	0.0620292271999342
"ENSRNOG00000007356"	"Chmp3"	"ENSRNOT00000010253.4"	4.39726134207734e-06	7.84343186462166e-05	0.911107084746807	0.198426345352058	5.26748365441492	9.8965678400001	9.30293973227763	11.4129199224284	7.81108481868379	6.83609895844737	25.2502185186263	24.1452884510716	24.78595163553	15.2388127379792	12.3257922473434	9.05192225436746	20.3492127181101
"ENSRNOG00000027503"	"Rps25"	"ENSRNOT00000029546.5"	4.40673611035314e-06	7.85326344414281e-05	1.75939093386143	0.383208154745042	6.74890299336101	134.834797652207	130.593881976681	124.359119843326	60.3374565364329	49.5599020123812	717.079020709044	708.599144958902	578.382436494802	271.974155758407	227.328917524973	99.9370316042056	500.672735089226
"ENSRNOG00000047748"	"AABR07038567.1"	"ENSRNOT00000075300.1"	4.42459497634172e-06	7.87800526919711e-05	-1.42402271373296	0.310219546293601	4.93401604436598	16.4870484676628	20.9598093167167	29.8832325727787	16.2638978793841	17.2627103097206	1.5938156738678	3.31645709532881	4.44674826180543	5.20832043113341	9.75783485167072	20.1713397092526	4.86463526276123
"ENSRNOG00000014476"	"Evl"	"ENSRNOT00000019583.3"	4.47905931925211e-06	7.96067430758916e-05	1.30784425354761	0.28506899428436	7.38929199762551	20.9042226429712	27.8689623656756	20.2111108957101	38.9819569122305	34.3181033587607	49.284609756883	83.6462218131404	63.0077269838414	215.529238157517	107.120423811055	28.4568712350696	103.717644104487
"ENSRNOG00000019940"	"Ssr2"	"ENSRNOT00000093056.1"	4.47509195928177e-06	7.96067430758916e-05	-2.79333791101654	0.608835425650258	0.703521774948324	0.796757375900186	1.20989609063712	0.444221834431761	1.93387408069366	1.15997881236633	0	0	0	0	0	1.10894563880581	0
"ENSRNOG00000049791"	"AABR07059552.1"	"ENSRNOT00000071219.1"	4.53276865648092e-06	8.04891366178159e-05	-3.45585015841355	0.753675866436249	2.17113628349334	11.5882437901525	6.97732898779652	8.46664765579214	17.257102443597	27.8473608525652	0	0.880429287655226	0	0	3.72541249076049	14.4273367459807	0.921168355683143
"ENSRNOG00000015401"	"Mapk4"	"ENSRNOT00000047271.5"	4.55608698621566e-06	8.08307751171314e-05	0.791178575653846	0.17258608762024	6.04629483064893	3.36777423360778	2.99603714767015	2.93579794711386	2.76436708418588	2.9832675369501	6.30190138082348	7.02415707879962	6.13022956052159	4.64773181745234	5.72013979338501	3.00944878990555	5.96483192619641
"ENSRNOG00000002436"	"Mmd"	"ENSRNOT00000003308.6"	4.59682370239276e-06	8.14805503670101e-05	-3.44902455927518	0.75266867787635	1.03136509907764	0.12071080953576	0.165549544944046	0.568238758605711	0.468607406007703	0.352606024230537	0	0	0	0	0	0.335142508664751	0
"ENSRNOG00000059615"	"Exoc6b"	"ENSRNOT00000086297.1"	4.65292730275972e-06	8.24013050570057e-05	-3.37373559398269	0.736646404231289	1.99867387867184	0.953182797636262	0.809584603970476	0.559577231314271	0.953004517193068	0.907336479774328	0	0.0342374092426488	0	0.0328029636496232	0.0577153982669572	0.836537125977681	0.0249511542318458
"ENSRNOG00000013368"	"Plcl2"	"ENSRNOT00000018146.7"	4.68042753941414e-06	8.28143147755089e-05	0.750691978468567	0.163955773177789	6.95337086385283	11.8925750273782	9.49094100307519	12.794967499975	5.78400061571413	6.73520067312004	16.1581031033177	17.2925105539988	20.1678023077809	14.4686121658685	16.5633588467491	9.33953696385251	16.930077395543
"ENSRNOG00000019851"	"Cox6a2"	"ENSRNOT00000026908.4"	4.72136145701732e-06	8.34640677910012e-05	1.60122235647231	0.34985609570575	4.73160887472493	5.72493695253693	4.35147157236714	7.12792290101097	11.1432718464963	21.5969319324049	36.2454347147245	21.1120923469621	59.2746892074581	58.7199376228601	23.3488918230207	9.98890704096325	39.7402091430051
"ENSRNOG00000062285"	"Pou5f2"	"ENSRNOT00000093516.1"	4.73034831772625e-06	8.35484069629065e-05	-2.7816236832663	0.607818540513402	0.697664661073204	0.310463140577111	0.838747440052938	0.404705306461211	0.129529519155651	0.308480251870685	0	0	0	0	0	0.398385131623519	0
"ENSRNOG00000004214"	"Rpl26"	"ENSRNOT00000005588.7"	4.74971368331104e-06	8.38157400375556e-05	1.9703408498103	0.430623862308575	7.82313337575469	191.385132727495	192.448139311314	166.075320736833	60.3686569355947	54.4956884600427	1196.80452789961	1391.71992170361	866.203983994923	389.100445727575	335.82751198783	132.954587634256	835.93127826271
"ENSRNOG00000013213"	"Epha4"	"ENSRNOT00000041689.4"	4.79483837529729e-06	8.4536754522479e-05	-0.759436199047607	0.16604889221855	7.58019347395841	24.7777471846614	27.1648983199644	25.1189516082963	20.434891064818	13.7323137495245	9.40610626115865	10.2662860237503	9.78165770081593	8.67490989045836	7.32484020846363	22.2457603854529	9.09076001692937
"ENSRNOG00000010912"	"Mrps25"	"ENSRNOT00000014933.5"	4.83541463482191e-06	8.51763660606807e-05	0.862873183268834	0.188737978920914	5.48684797076839	13.3717105511629	15.2623452007862	14.9484242222119	12.5105280420047	11.5924516405317	31.6029423540364	28.3459976980741	32.0206001747679	29.0530152507214	20.6575468152243	13.5370919313395	28.3360204585648
"ENSRNOG00000012406"	"Pcbp4"	"ENSRNOT00000017139.6"	4.85254679849244e-06	8.54022379269314e-05	1.04436318319793	0.228472680837373	7.47163095060742	20.9061494002272	22.3664802497516	19.766453851539	35.6785010748386	39.7152942686095	50.7986735380187	50.5861044818336	52.1290126185392	119.535306940231	84.0082216242742	27.6865757689932	71.4114638405793
"ENSRNOG00000010133"	"Bpgm"	"ENSRNOT00000013569.4"	4.87049956219341e-06	8.5642138264407e-05	0.752269420460401	0.164599934414262	6.72768117235102	17.2010425208407	16.1304916209178	18.1497676613716	22.3252846150364	23.8600262054685	30.9047476391797	29.5342861164855	37.3685621568519	45.68779821648	40.7067683399191	19.533322524727	36.8404324937832
"ENSRNOG00000012878"	"Atp7b"	"ENSRNOT00000089265.1"	4.88643985559589e-06	8.58462576403757e-05	-3.25339584679526	0.711964327117995	1.59016091048337	0.226837205483871	0.119107898682785	0.141230270246972	0.222120473097247	0.175160628210128	0	0	0	0	0.080442398350524	0.176891295144201	0.0160884796701048
"ENSRNOG00000016122"	"Hmgcr"	"ENSRNOT00000022055.4"	4.93579492004366e-06	8.66149420875877e-05	-0.768019748689901	0.168148882569927	6.82315042085408	13.1847187057721	12.325032859406	13.724635728717	18.4373231684364	19.9694809941402	5.27170664894155	5.43277963867668	4.68804976248659	7.62509051505166	9.66798748712582	15.5282382912943	6.53712281045646
"ENSRNOG00000005428"	"Ctbp1"	"ENSRNOT00000065393.2"	4.9389354876608e-06	8.66149420875877e-05	0.752715577856231	0.164803026883404	7.3939724533859	31.9858350795662	29.5721640696015	32.0079950705508	24.3810660576401	23.9523806425395	49.7544094703066	56.9496364141441	63.0305477724849	55.7339475104469	42.4363610251772	28.3798881839796	53.5809804385119
"ENSRNOG00000056607"	"RF00560"	"ENSRNOT00000087060.1"	4.95034726083948e-06	8.67383127038514e-05	-2.77803882386268	0.608301112221142	0.695872231371392	12.8753147438951	13.6456212832714	21.3950731012857	41.9806797988777	37.4315668292245	0	0	0	0	0	25.4656511513109	0
"ENSRNOG00000058050"	"Bclaf1"	"ENSRNOT00000079069.1"	4.96972505427092e-06	8.70009199650944e-05	-2.85526147607137	0.625322576176451	0.734483557475737	0.120944118898843	0.214766697315364	0.129205221647016	0.391864301932986	0.401153445644684	0	0	0	0	0	0.251586757087779	0
"ENSRNOG00000000488"	"Hmga1"	"ENSRNOT00000000580.4"	4.9819452317717e-06	8.71378717193467e-05	0.896170481026888	0.196289855497532	5.30285799715146	41.6755341897398	31.1978365115162	48.0377036423597	45.9153796145046	65.6854562349924	83.6153432363064	64.159450103501	99.8484435004446	105.708729669704	115.659740204019	46.5023820386225	93.798341342795
"ENSRNOG00000061874"	"AABR07047036.1"	"ENSRNOT00000091550.1"	5.04266175936716e-06	8.79669261314956e-05	-3.64954273313527	0.799811253210307	2.87478472981096	3.12813148575729	3.28655314601245	5.9418709244117	5.9469132485999	6.70635321941165	0	0	0.0845835602890699	0.62317411659622	0.629618763463052	5.0019644048386	0.267475288069668
"ENSRNOG00000055082"	"Maz"	"ENSRNOT00000086019.1"	5.04074917789269e-06	8.79669261314956e-05	1.48942199195351	0.326406833113932	6.34178203520111	7.262419559493	7.79985823035447	6.6302426183256	15.7494485386183	18.6894685191371	24.6829699989653	26.831289843581	29.0533586192405	74.35042457019	72.9337981755012	11.2262874931857	45.5703682414956
"ENSRNOG00000047386"	"Smg1"	"ENSRNOT00000072266.2"	5.04208678980351e-06	8.79669261314956e-05	-4.16414554467784	0.912583642205965	1.38892559177897	0.0892103111191654	0.175007395837367	0.0756426014316131	0.625610761431352	0.0624450484208479	0	0	0	0	0	0.205583223648069	0
"ENSRNOG00000006827"	"Tmem198b"	"ENSRNOT00000008929.3"	5.07343148827295e-06	8.83865938685131e-05	-1.09832347304015	0.240769165544428	4.66564780752635	3.66678356122825	3.9010939321074	3.07528970859753	2.99643253809616	3.93208261008635	1.21367163113921	0.847268088896623	0.643582069418385	1.42299966919382	1.22797754013905	3.51433647002314	1.07109979975742
"ENSRNOG00000006037"	"Snap25"	"ENSRNOT00000080581.1"	5.07563929062764e-06	8.83865938685131e-05	-3.29307842409939	0.721907196273865	2.49806579990385	3.58778719610901	5.18316764339366	5.83957643287862	13.3416961118515	10.8697870622454	0	0.318015914850576	0	1.67283837140607	0.384460767617126	7.76440288929564	0.475063010774754
"ENSRNOG00000014162"	"Plekhb2"	"ENSRNOT00000019419.5"	5.14329786839884e-06	8.94861579087443e-05	0.806846183005731	0.176984347076844	8.37607450181302	46.39827776785	40.8096835338777	48.2556080334604	39.1693227358742	44.8517485101599	90.1805382326055	81.9812350770671	91.1121424583906	91.8583291765442	82.0898297142547	43.8969281162444	87.4444149317724
"ENSRNOG00000012681"	"Lgals9"	"ENSRNOT00000093550.1"	5.18077761611075e-06	9.00591842267252e-05	-3.08670772640286	0.677306039394794	1.12543190859961	0.520818423518969	0.762078413446402	0.755178484351336	1.05752764069091	0.629934325366716	0	0	0	0.0680857891799186	0	0.745107457474867	0.0136171578359837
"ENSRNOG00000016396"	"Fbxo11"	"ENSRNOT00000093590.1"	5.21911933895272e-06	9.06461769851237e-05	-2.96015386098232	0.649757660244701	0.786929749931216	1.59562521874697	2.05231089765576	1.53924153723386	0.738753268431192	0.674018273719157	0	0	0	0	0	1.31998983915739	0
"ENSRNOG00000051775"	"AABR07016412.1"	"ENSRNOT00000088620.1"	5.22879808000771e-06	9.07347561747047e-05	-3.63466458415272	0.797881850980103	3.02635975305401	27.4908544318792	27.6489385199035	42.4507893873681	73.6996206988869	61.2574841070453	2.37909178463912	0	0	4.45548722806832	4.1083839709719	46.5095374290166	2.18859259673587
"ENSRNOG00000031269"	"RGD1304694"	"ENSRNOT00000042070.5"	5.28817032472682e-06	9.16847518154956e-05	1.22638946302907	0.269357471608638	7.85848759643239	16.5253508865505	17.5893905398133	16.544473478505	30.4571647336412	31.9266757325949	37.825019471382	49.268554054923	54.9516678011797	122.693785566985	95.9950887872633	22.608611074221	72.1468231363466
"ENSRNOG00000031671"	"Rasgef1a"	"ENSRNOT00000051804.6"	5.31353583770438e-06	9.20440032305837e-05	0.797684190611062	0.17523772526996	5.93554745020651	5.91820236756215	7.6767370994105	8.73010718391593	10.0970748187026	8.74841958148002	9.96146814508623	16.2255344780183	18.8726019972103	20.2057055452115	16.9521151145259	8.23410821021424	16.4434850560104
"ENSRNOG00000031244"	"LOC108349606"	"ENSRNOT00000051207.3"	5.32600558372351e-06	9.21794346311343e-05	1.22466249181427	0.269066780779317	6.10151314076248	18.6555489442531	32.9046406733215	23.3823556695592	9.10344206646541	11.5790511442892	56.9696503837722	69.6040271630861	58.4441522755653	44.6695092180773	35.3947420109027	19.1250076995777	53.0164162102807
"ENSRNOG00000060512"	"AABR07035541.2"	"ENSRNOT00000086773.1"	5.36660235045099e-06	9.28010111508614e-05	-2.76500767467462	0.607704526675878	0.689356656777364	1.58817711440529	2.37117136057281	2.53343787101164	3.40999364235671	2.35827946719132	0	0	0	0	0	2.45221189110755	0
"ENSRNOG00000032232"	"LOC687679"	"ENSRNOT00000050931.3"	5.37505627853629e-06	9.28661641427669e-05	2.1159761196529	0.465091614589696	4.65384285827532	14.6765541601456	7.26228682884373	3.47161347164527	14.573592408731	10.8554764167509	73.1982201016554	48.772494126565	53.8023786008378	70.5273377528986	76.8899617686781	10.1679046572233	64.638078470127
"ENSRNOG00000018916"	"Bcl7c"	"ENSRNOT00000025618.5"	5.38968111415868e-06	9.29829573335053e-05	1.22052323160695	0.268304765640728	4.83503734062245	5.42522991667361	5.40768609120569	4.08394975597127	3.01243260780322	2.82199460244157	14.5990323708915	24.1203382625996	11.4056004290294	10.1137891205277	6.14572804282753	4.15025859481907	13.2768976451751
"ENSRNOG00000021614"	"Kmt2e"	"ENSRNOT00000076950.2"	5.391200382308e-06	9.29829573335053e-05	1.41450921823173	0.310952305835131	5.03610700262234	3.02775691108804	3.04233923120129	5.19870434448148	8.56327711334736	7.4640932104856	11.2178427119903	16.0416426777861	10.8823965995498	33.334558050803	30.0826746838426	5.45923416212075	20.3118229447944
"ENSRNOG00000019857"	"Gng7"	"ENSRNOT00000026893.4"	5.40883129200353e-06	9.31866786944805e-05	2.2858579257336	0.502577274920088	7.13960182469937	4.0468965086933	4.28032692238187	3.6212239432284	12.2597069824882	20.3379652306428	26.7167508723616	33.7830413451369	44.2951624172606	131.702600284711	153.629760985067	8.90922391748692	78.0254631809074
"ENSRNOG00000036798"	"Dusp3"	"ENSRNOT00000055194.3"	5.41241697418111e-06	9.31866786944805e-05	0.747577736619426	0.164370279202226	7.2846813041184	11.3288810602285	10.8223119634217	11.5736306700772	11.0089836093266	13.1769511149543	19.3218255711934	23.0135424347491	20.0443496384713	24.077859003297	22.6745503132861	11.5821516836017	21.8264253921994
"ENSRNOG00000014059"	"Odf2l"	"ENSRNOT00000080600.1"	5.45306643385756e-06	9.38050499303431e-05	-1.29737262607477	0.285352782245571	4.39639260085467	2.63569433796729	1.78963408065993	2.76323642642667	2.1771789093781	2.35031675501524	0.579448325804404	0.48464355655098	0.71760072070473	0.217402150442502	1.23103541249076	2.34321210188945	0.646026033198675
"ENSRNOG00000004232"	"G2e3"	"ENSRNOT00000005670.7"	5.53896865911844e-06	9.51694712765887e-05	-1.38341795244599	0.304498661889805	4.10947796182373	1.21632887128672	1.38854169625782	1.27300716917914	1.09086615132908	0.985915279451713	0.146991528302418	0.21848890684609	0.68578977727257	0.213170154793359	0.255768542154158	1.19093183350089	0.304041781873719
"ENSRNOG00000055185"	"Dusp9"	"ENSRNOT00000087962.1"	5.54198767993053e-06	9.51694712765887e-05	-2.72993382803111	0.600890138939827	0.671819733455609	0.105550303289891	0.102617414992441	0.176595998524311	0.100425803187269	0.265314402751136	0	0	0	0	0	0.15010078454901	0
"ENSRNOG00000014761"	"Rasd2"	"ENSRNOT00000020017.3"	5.61386128472798e-06	9.63202502852418e-05	0.744459013954209	0.163962090929772	6.94723477019258	8.71626251646942	8.24718693837795	13.3882557793027	11.5312722093632	9.8928402550792	17.9073556403853	15.9354773674209	24.4184044862285	22.6952912274484	16.1184609498437	10.3551635397185	19.4149979342654
"ENSRNOG00000026319"	"Akap9"	"ENSRNOT00000010118.6"	5.78894975342181e-06	9.92384232383737e-05	-1.95030515270363	0.430155428731149	5.70034739585966	3.11095772388173	3.28308041821982	3.37330167754432	3.15312088258058	2.6226055879728	0.492332796534003	0.260524649493737	0.408853655419125	0.541660964582343	0.324323682196043	3.10861325803985	0.40553914964505
"ENSRNOG00000014031"	"Esco1"	"ENSRNOT00000033312.5"	5.80547070556193e-06	9.94356205463447e-05	0.775257235109699	0.171011888141252	6.1266753281178	4.84212219888647	4.84840846515485	4.19251230369723	3.30176381781469	2.80463258414371	7.53237102857682	7.28364100200081	8.72504258305465	7.32251556625501	7.0737701927628	3.99788787393939	7.58746807453002
"ENSRNOG00000010299"	"Eps15"	"ENSRNOT00000064145.2"	5.81246012107831e-06	9.94693628837728e-05	0.74817317530003	0.165046737915916	7.47208704793566	21.1535630164424	21.3169072755756	23.0419443735315	20.4914982354399	27.1127315864233	35.5801106605925	36.5326294198275	38.2748818638979	49.1739019415974	55.4994647167809	22.6233288974825	43.0121977205392
"ENSRNOG00000006947"	"Pdhx"	"ENSRNOT00000009552.5"	5.84983477426551e-06	0.000100022584746868	-2.8600588841124	0.631116418878776	0.736882261496255	0.134209229952905	0.140282026983878	0.417039703814407	0.617444335827361	0.238652697573189	0	0	0	0	0	0.309525598830348	0
"ENSRNOG00000017960"	"Deaf1"	"ENSRNOT00000048817.3"	5.88459980040536e-06	0.000100530270900546	1.26729851087654	0.279726357237088	7.34774312140056	14.4551237988519	17.0907768684942	14.5286348339035	32.9852022131884	26.2307123021884	39.9108471660125	47.8744658884256	50.2962851239462	138.776273629002	73.0642497215412	21.0580900033253	69.9844243057855
"ENSRNOG00000049336"	"Lime1"	"ENSRNOT00000019545.5"	5.91179463735514e-06	0.000100907867638645	-1.97698245960448	0.436466254296775	3.63733549287522	2.44651498952136	2.44894253759069	2.16692722514875	3.66950923344977	3.54320597733428	0.445147981202425	0.684539321659631	0.054204652660614	0.604031784869041	0.362165365330423	2.85501999260897	0.430017821144427
"ENSRNOG00000045619"	"AABR07025366.1"	"ENSRNOT00000074539.1"	5.95703759899467e-06	0.000101592611100927	-3.23039768448827	0.713441473862652	1.66932915349303	34.3834209099445	16.3467691956068	48.1786413244508	40.203031463935	40.9917912514302	3.15783129086161	0	0	0	3.58865501490267	36.0207308290735	1.34929726115286
"ENSRNOG00000061345"	"LOC690414"	"ENSRNOT00000089968.1"	5.98160689358785e-06	0.000101923906973543	-1.22768033927101	0.271188407526063	4.63811917420139	5.06528397751361	4.50350086618755	5.50531912179609	10.93140111175	9.0835179647466	2.71308638405003	0.837918027859785	1.35619044427793	2.17323584988719	2.12457806096839	7.01780460839877	1.84100175340866
"ENSRNOG00000001861"	"Ydjc"	"ENSRNOT00000078394.1"	6.0053628115405e-06	0.000102240785941837	1.4661883619607	0.323933592017553	4.12427010461927	0.733408063559589	1.24952596363814	0.668976544250339	1.16571632035813	2.55796352470827	3.01459243340705	4.2756431119825	3.03798118346234	8.01548698214088	5.22035046631707	1.27511808330289	4.71281083546197
"ENSRNOG00000003829"	"Ap3s1"	"ENSRNOT00000064116.1"	6.09799637802593e-06	0.0001037287504063	0.771814903881365	0.17064365543458	6.14016304522227	13.3032667629579	16.9570673745921	14.1433133842412	12.0286788001369	11.468981185315	29.9712576308907	25.735522720975	33.3185430796004	21.7362177865551	20.3888781858232	13.5802615014486	26.2300838807689
"ENSRNOG00000037886"	"Hs6st3"	"ENSRNOT00000057567.3"	6.13775472665236e-06	0.000104315510650146	-3.32899546586795	0.736244822389268	2.02858587385088	2.90926213384847	1.4820908316129	4.6310661308846	1.95461735521779	4.71098063594596	0	0	0	0.160297543414933	1.04077721847161	3.13760341750194	0.240214952377309
"ENSRNOG00000009968"	"Ercc8"	"ENSRNOT00000013598.5"	6.19120289401463e-06	0.000105133734147976	0.804383786350529	0.177970768077566	5.91196357520341	5.04993489117879	5.29587788951441	4.55369930285475	5.36322624766084	4.44049660457122	7.56321442587913	9.80484379170185	12.3970865552192	12.0776525166642	8.16195024550708	4.940646987156	10.0009495069943
"ENSRNOG00000050746"	"AABR07024463.1"	"ENSRNOT00000070877.2"	6.20218612320064e-06	0.000105140053381922	-2.74960857021631	0.608404334708514	0.681657104548208	0.120328183295583	0.136668023599534	0.141609466437321	0.0857457694801219	0.0753397556619966	0	0	0	0	0	0.111938239694911	0
"ENSRNOG00000018960"	"AABR07001382.1"	"ENSRNOT00000081637.1"	6.2001421442045e-06	0.000105140053381922	-1.22367836220481	0.270758438685824	5.3977906775476	2.14678213726684	2.49326938971018	2.86533539849319	1.40294958413678	1.00131723412138	0.403036964525261	0.794385308187735	0.75876312674245	0.302163980567598	0.360302704554651	1.98193074874567	0.523730416915539
"ENSRNOG00000004947"	"Zfp871"	"ENSRNOT00000006697.7"	6.22023950361012e-06	0.000105291831914739	-0.843905804993782	0.186755993337496	5.62000110532348	9.08717394261354	8.14972049874549	7.60152663729188	14.763261493202	12.3751561765423	2.83744451241339	5.21350525577692	3.29609307982021	4.86961371140058	3.50312804115951	10.395367749679	3.94395692011412
"ENSRNOG00000013282"	"Mctp1"	"ENSRNOT00000064743.3"	6.2217659167462e-06	0.000105291831914739	-3.74151472458425	0.828005127368899	1.94086826805835	5.43426598223986	2.36553564339796	4.71340268343189	3.22760817072212	2.79530696189382	0	0	1.46248604086404	0	0	3.70722388833713	0.292497208172808
"ENSRNOG00000018343"	"Isca1"	"ENSRNOT00000024781.6"	6.26191031425396e-06	0.000105880782165163	0.740492591748118	0.163921990973276	7.1429285996396	24.4716771040778	21.4488627860582	26.0365804642783	25.215677999911	25.6039676352868	39.4924934716596	38.6115410115927	50.6484114933521	48.8417822503207	52.424191924461	24.5553531979224	46.0036840302772
"ENSRNOG00000051591"	"LOC100911422"	"ENSRNOT00000090180.1"	6.30938695073605e-06	0.000106592601195854	-3.36691677832325	0.745594596012268	0.990311208601679	0.34140266768877	0.84478777956596	0.178439670422979	1.94338206059922	0.892142633945487	0	0	0	0	0	0.840030962444483	0
"ENSRNOG00000002948"	"Abcc3"	"ENSRNOT00000003977.6"	6.41323254987565e-06	0.000108254709915576	-3.4123445536356	0.75623393411337	1.01305276737585	0.256811432086868	0.234347150234324	0.150906432697255	0.129937020744636	0.0760200585969772	0	1.3885770918446e-07	0	5.0540081791011e-07	0	0.169604418872012	1.28851705418914e-07
"ENSRNOG00000002161"	"Tlr6"	"ENSRNOT00000076753.2"	6.50886461570161e-06	0.000109775463905837	-2.6956197121997	0.597811385406277	3.26171714214662	1.05984340048824	1.37219780458278	1.95234359418109	2.6593133430869	2.89163015704442	0.0232022025553181	0.0258174457344346	0.110763642461987	0.217394924504359	0.598419785873478	1.98706565987669	0.195119600225915
"ENSRNOG00000039417"	"Dda1"	"ENSRNOT00000060404.3"	6.52255494595299e-06	0.000109912815785672	0.750199886962788	0.166389338108072	6.49530244576449	10.0011988634981	11.9467218268351	11.4922237672364	16.3546479201427	19.472653767205	22.7622322775047	21.5072555870019	21.5462898100432	30.5858877094965	31.8866022579274	13.8534892289835	25.6576535283947
"ENSRNOG00000015383"	"Asxl3"	"ENSRNOT00000020661.6"	6.61616219212348e-06	0.000111395485268743	0.823155691167854	0.182693004229995	5.67074448867986	1.43975456377844	1.26786833636878	1.46743164332048	1.35016185978066	1.37734054243223	2.48277125704052	2.76933067628909	3.25436922804232	2.76717528776147	2.80524868903128	1.38051138913612	2.81577902763294
"ENSRNOG00000041423"	"AABR07007689.1"	"ENSRNOT00000063176.1"	6.63970126446102e-06	0.000111696909981175	-3.30283755817726	0.733161822225238	1.57163983489345	11.9847168343298	9.86917362455141	22.4647920663649	101.337925642095	70.5694145058905	0	0	0	2.49613725488243	2.11726149214761	43.2452045346463	0.922679749406008
"ENSRNOG00000049219"	"Rnf187"	"ENSRNOT00000073082.1"	6.67386081714614e-06	0.00011217633571958	0.79638276506851	0.176823327283497	8.11944146884536	51.6262910659708	51.8837385161623	52.5846539709	75.4063589614955	84.9943535437721	92.7017535399718	101.400815122825	120.938236578089	203.406729729385	115.685410648237	63.2990792116601	126.826589123702
"ENSRNOG00000015997"	"Ccdc106"	"ENSRNOT00000021613.5"	6.68803572869946e-06	0.00011231932545393	0.816842430859999	0.181384200382349	5.69895384591555	11.2330506059288	10.040304363032	9.32281445395276	11.5759340553669	14.3287713456678	21.0454859265074	21.2327450011751	22.024737666752	24.2509456622619	23.4087213566802	11.3001749647897	22.3925271226753
"ENSRNOG00000014139"	"Sclt1"	"ENSRNOT00000019256.6"	6.70490215078839e-06	0.000112507236174575	1.02058740764497	0.226653784158012	5.3972171340807	2.67633036762784	2.29960360048131	3.6240327303044	2.5796728526131	2.46292692255846	7.21667167875347	9.27495141151309	11.7549676813556	3.84242275294812	4.34183438662354	2.72851329471702	7.28616958223876
"ENSRNOG00000019996"	"Slc16a1"	"ENSRNOT00000027234.5"	6.7888550972644e-06	0.000113819578225456	-0.835553885537081	0.18567025934569	5.929489971725	15.4608730500876	16.3327387207243	14.3473606090193	7.22005536451044	7.90394360522285	5.14888597440577	4.54229931414317	3.54562506538143	4.29207437222895	4.93032450688506	12.2529942699129	4.49184184660888
"ENSRNOG00000006030"	"Ptprz1"	"ENSRNOT00000008719.5"	6.9075572272958e-06	0.000115711801837127	-0.935926590101913	0.208144778388324	7.96317622314705	26.2273181093964	43.7864201916332	25.7586105614868	32.3927382324488	17.335989235808	9.7030684198499	16.2129218864454	7.89982681158562	10.2235688599376	6.85574666928489	29.1002152661546	10.1790265294207
[truncated: 8,303,522 more chars]
