# Supplementary material for: Free circular introns with an unusual branchpoint in neuronal projections
Source: eLife. 2019 Nov 7;8:e47809. doi: 10.7554/eLife.47809 (PMC6879206; doi:10.7554/eLife.47809)
Supplement: Figure 2—source data 2. [file elife-47809-fig2-data2.xlsx]

## Sheet: Sheet1
Table S4: ACDBio smFISH probe information
Gene name	Targeted feature	rnor6 coordinates	Genomic strand	ACDBio channel	Refseq accession and sequence
Pabpc1	Exons	chr7:75,409,581-75,421,874	-	C1	>NM_134353.3 Rattus norvegicus poly(A) binding protein, cytoplasmic 1 (Pabpc1), mRNA CTGCCGCCCGGACCCAGCACCGCCAGCCTCGCTCCCCCGGTTCCACGGCCGTTGAGTACGCGTCGATTCCGGTTGAATTTTGTCCCTCTGCGCTCGCCCCCGCTCCCCTCCCCCCGGCTCCGTCCCCCGGCCCCGCACTCGCTCTCCTCCTCTCACGGGAAAGGTCGCGGCCTGCGGCCCCGCGGGCAGCCGTGCCGAGATGAACCCCAGCGCCCCCAGCTACCCCATGGCCTCTCTGTACGTGGGGGACCTGCACCCCGACGTGACCGAGGCGATGCTCTACGAGAAGTTCAGCCCGGCCGGGCCCATCCTCT…
Rpl4	Exons	chr8:69,121,682-69,126,805	+	C2	>NM_022510.1 Rattus norvegicus ribosomal protein L4 (Rpl4), mRNA CCTGTGGGAGCAGCCGGGTAGAGAGGAGCGTGGCCTTCTCCTCTCCCCGCCATGGCTTGTGCCCGTCCCCTCATATCGGTGTACTCTGAAAAGGGGGAGTCATCTGGCAAGAATGTCACTTTGCCAGCTGTGTTCAAAGCTCCCATTCGACCGGATATTGTGAACTTTGTTCACACCAACTTGAGGAAGAACAATAGACAGCCCTATGCTGTCAGTGAATTAGCAGGTCATCAGACCAGTGCTGAGTCCTGGGGTACTGGTAGAGCTGTGGCTCGAATTCCAAGAGTTCGAGGTGGTGGCACCCACCGTTCTGGCCAGGGTGCCTTTGGAAACA…
Sept3	Exons	chr7:123,506,534-123,526,542	+	C3	>NM_019375.1 Rattus norvegicus septin 3 (Sept3), mRNA GGAATTCCGGGCGCGGGACAAAGGAGGATTCATGTCCAAAGGGCTCCCAGAGGCTAGGACGGACACAGCCATGTCAGAGCTGGTGCCCGAGCCCAGGCCTAAGCCGGCGGTGCCCATGAAGCCGGTCAGCATCAACTCCAACCTACTAGGCTGCATTGGCATTGACACCATTATCGAACAGATGCGCAAGAAGACCATGAAGACTGGTTTTGACTTCAACATCATGGTCGTTGGCCAGAGTGGACTGGGCAAGTCGACGCTGGTCAACACACTATTCAAGTCTCAAGTGAGCCGGAAGGCCTCCAGCTGGAACCGGGAGGAGAAGATCCCGAAGACAGTGGAGAT…
Sept3	Regular intron	chr7:123,518,149-123,521,143	+	C1	>Sept3_i7 TAGGTGCATGGGGCTCTCTTTGTCACCAGATGCTCCCTCGGTGCCTCTGGGGGTTGCCTTCAGGTCTTTCCTCCTGCTCTTCCCTTACCATGACCCGTTGTCACTTCACCTAACCTAGACCACAGGAGGTATGGATGTCAGTGACCCTCACTAGGACTGTGAACTCACAGAGGGGCTTCCTGTGCTCAGGAAATTAGTCCCTTCAATCACCAGACATTAGGAGAGCCTCACCTTCCTTCCAAGGATCTGGCAAAACCATTTTCAGATGATGGGGCATTGAGCTAATGCCCAGAGGAATCTATAGTTAGAGTTTGCCTCAGTTTCTCCCTCTACAAAATACAGAGGCTGGACTAGGTGAGTGGCTTATAGGCTTTCTCTGACTTTAGAAG…
Sept3	Retained intron	chr7:123,523,992-123,526,476	+	C2	>Sept3_i10 TGAGCGTGGACACAGAGGAAAGCCACGACAGTAACCCGTGATGAGCCCTTCTCTGTGTTATCATACATATCCCCCTTCTCTAAACACACACACACCCCAGATACCACCTCCAGCCACCTCCTCCTTTCAGCTGTCCTACAGGCCTGTCTGGTATTTGTGCAGTATTTTGTCTGGTGTGTGTGAGTGTGTGTGTGTGTGTGTGTGTGTGTGTGTGTGTGTGTGTGTGTGTGTATGATAGAGAATGCCTGTGTGTCATGTGTTTGTGTGTCTTGCCTGTGCCTGTGCGTGTGCATGCCTGTGTGTGTGCGTGTGTGTGCCTCTGTGTACGCGTGTGCTCAGGGGTGAGGTATTTTCATTGCCCTCTCTGGAAAGTTCTTTGTAAGTCTGC…
Srsf5	Exons	chr6:104,611,026-104,615,302	+	C2	>NM_001195505.1 Rattus norvegicus serine and arginine rich splicing factor 5 (Srsf5), transcript variant 1, mRNA TGCTAAGTGCGTCAGTTGTGGAGAGACGTAGAGGAGTTGAGTTCGTGTGTGTAGGGAGGCAGACAGCTCCGACGCAGACTACGGACCTCTCCAGGTCTCAGCCGTCAAAGACCCTGTCCGGTAGGTGAGTGGCTCGCTTTGAGGGCAAGGCTTCTCGGATCGAGGCTTCTTCATGGCCGCTCGGGTCGCGAGCGGCCGGGGCTTCGCTCTTTGCGGAGGACGGCGTCTAACAGAGCGCAGTTGATTGAGGAAACACTAGCCGGGGATCATGAGTGGCTGTCGAGTG…
Srsf5	Regular intron	chr6:104,611,276-104,612,018	+	C1	>Srsf5_i1 TGGGCGCTGGGGCACGTCTCCCTTTTGGTGTTGCTTGAGGGGACACAAGGCGGAAGGGCGGGCGTGGGGGAGGGCGTTTATAGAGGGAAGCAGCGCGCCCCTCCCCGCCACCCTTAGGTGGTTCTTATCCGGTCCTTATGCTTGTACGCTGGTATCCGGCCTTGCCCGAGGCTGCAGTTCCTTATTGGCCTGCAGGCTCGGCGCCCAGGGCCCGGTTTGCCCGCGGCTGAGGGGGGAGCTCGGCTCGCTCGCTCCTCCCCCGCCGCAGACTCGGCCGTCGCCATTTTGTGCTGCGAACGCGCCCGTCGCCGACTGCGCAAGCTCGGTTGTGGCGTCGCGAGATTCCGGCTTGTGACGCTCGGGGAGGCCGGGACGCGGGCGCGGCCGGC…
Srsf5	Detained intron	chr6:104,613,193-104,614,310	+	C3	>Srsf5_intron TGGATTTAATTCAATTATAATTTTAAACTTTAGTTAAATGTAACTGGGGGATGTTTCAGATTTTAATATTAGTGATCAAATGTAAATGTTTTGAGGTTATTTTTTCATGTTTTTTAAAATCAATTTTAACCAAATATTAAACCCTTTATTTGCCAGCCTATCTGTGTCGTTGGCCTTATGACGAGGAGTGCCTGTGGGTTATCCTAATCGTTGTCTTGGTCACTCTTGGTTGGGCCTGGTTGACTTTGCCAGTCAGCTCCTACAGTGATCAGTTGGCCACCTCTAGATCTGTGTTTGCCGGTCTAGACGTAATCGGTGCACTTACTTGAAGTGCCGGGTTGCAGCGATCCCAGAACGTTGATAACGTGATCTGATCCCTAAGTTG…
Creld1	Exons	chr4:145,440,284-145,449,891	+	C1	>NM_001024783.1 Rattus norvegicus cysteine-rich with EGF-like domains 1 (Creld1), mRNA TGGGAATCTAACCCTCTCTCTCTAATTCTGGCCCCTAATAATCCACTGAGACCCTAAAACAATGGGCTGACGCCTATTCTTTTGCCAGCGATCCCGGCCACCTCCCCCTACGGCTGGCTTTTCCAGTGAACCCTCCCCCTGCCCTCTATCTGCACGTTCCCAGCCTGGGAAAAGATGGCTCCACAGCCCCTAAGGGGCCTGGTCCCATTTCTGCTCTGGTGCTTGAGCCTGTTTCTTAGCCTCCCAGGACCTGTCTGGCTCCAACCCTCTCCTCCTCCCCATTCTGCTCCCCGAGCTGAGCCCCATCCATGT…
Creld1	Intron	chr4:145,444,998-145,445,260	+	C3	>Creld1_intron GTGAGGGGCGGGAGGGGCTCACAGACAGGCCCTGGCTTTTACTTGACCAAGAAACAGTTGCATGACAGCCTAGTTGAGAGCCTTCCAAATCTAGATCTGAAGACTTGCCTCTGGGTACCAGGCCCACAGTCTGGGATTGTTTACTCCTCTGCCCAAAGGGCCTTGATCAACTGGTTCCTGGGACATAGGCCCATGTTGAGCTGAATTCCAGATTCGGGGAGAGTAGGAGAAGGCAGCCACTCCCGCACTGTCAGCACCCTCGC
Polr2a	Exons	Proprietary to Advanced Cell Diagnostics, Inc		C1
Ppib	Exons	Proprietary to Advanced Cell Diagnostics, Inc		C2
Ubc	Exons	Proprietary to Advanced Cell Diagnostics, Inc		C3
