# Supplementary material for: Free circular introns with an unusual branchpoint in neuronal projections
Source: eLife. 2019 Nov 7;8:e47809. doi: 10.7554/eLife.47809 (PMC6879206; doi:10.7554/eLife.47809)
Supplement: Figure 3—source data 1. [file elife-47809-fig3-data1.tds]

# This table is a compilation of observations for each intron region and the source for Figures 3, 4, and 5.
# There are 190,180 rows (intron regions) and 73 columns (observations for each intron region).
# cb is an abbreviation for Cell Body or whole cell data; p refers to Projections data.

# The variables are explained below:
# [chr, start, end]	Chromosomal coordinates for intron region (rnor6)
# strand	Chromosomal strand of intron region
# intron_id	Unique ID for each intron region made by combining ensembl gene ID and intron number
# ens_geneid	Ensembl gene ID for the gene corresponding to the intron region
# ext_geneid	Gene name of the gene corresponding to the intron region
# intron_len	Length of intron region
# [cbr1_intron...cbr5_intron]	Number of reads on intron region in whole-cell total RNAseq, replicates 1-5	
# [pr1_intron...pr5_intron]	Number of reads on intron region in projection total RNAseq, replicates 1-5
# polya_intron	Number of reads on intron region in polyA+ RNAseq, sum of three replicates
# ribo_intron	Number of reads on intron region in ribosome profiling, sum of three replicates
# [cbr1_ee...cbr5_ee]	Number of reads on 50 nt exon-exon junction in whole-cell total RNAseq, replicates 1-5
# [pr1_ee...pr5_ee]	Number of reads on 50 nt exon-exon junction in projection total RNAseq, replicates 1-5
# polya_ee	Number of reads on 50 nt exon-exon junction in polyA+ RNAseq, sum of three replicates
# ribo_ee	Number of reads on 50 nt exon-exon junction in ribosome profiling, sum of three replicates
# [cbr1_ei...cbr5_ei]	Number of reads on 50 nt exon-intron boundary in whole-cell total RNAseq, replicates 1-5
# [pr1_ei...pr5_ei]	Number of reads on 50 nt exon-intron boundary in projection total RNAseq, replicates 1-5
# polya_ei	Number of reads on 50 nt exon-intron boundary in polyA+ RNAseq, sum of three replicates
# ribo_ei	Number of reads on 50 nt exon-intron boundary in ribosome profiling, sum of three replicates
# [cbr1_ie...cbr5_ie]	Number of reads on 50 nt intron-exon boundary in whole-cell total RNAseq, replicates 1-5
# [pr1_ie...pr5_ie]	Number of reads on 50 nt intron-exon boundary in projection total RNAseq, replicates 1-5
# polya_ie	Number of reads on 50 nt intron-exon boundary in polyA+ RNAseq, sum of three replicates
# ribo_ie	Number of reads on 50 nt intron-exon boundary in ribosome profiling, sum of three replicates
# CBpas_intron	Number of reads on intron region in polyA site sequencing data from whole-cells
# Ppas_intron	Number of reads on intron region in polyA site sequencing data from projections
# circ_num_cb	Total number of circularly permuted reads on intron region in five whole-cell total RNAseq replicates
# circ_num_p	Total number of circularly permuted reads on intron region in five projection total RNAseq replicates
# mean_cb_intron	Mean reads on intron region across five replicates of whole-cell total RNAseq
# mean_p_intron	Mean reads on intron region across five replicates of projection total RNAseq
# cb_intron_perlen	Mean reads (whole-cell total RNAseq replicates) on intron region divided by intron region length
# p_intron_perlen	Mean reads (projection total RNAseq replicates) on intron region divided by intron region length
# mean_cb_ee	Mean reads on exon-exon junction in whole cell total RNAseq replicates
# mean_p_ee	Mean reads on exon-exon junction in projection total RNAseq replicates
# mean_cb_ei	Mean reads on exon-intron boundary in whole cell total RNAseq replicates
# mean_p_ei	Mean reads on exon-intron boundary in projection total RNAseq replicates
# mean_cb_ie	Mean reads on intron-exon boundary in whole cell total RNAseq replicates
# mean_p_ie	Mean reads on intron-exon boundary in projection total RNAseq replicates
# P_over_CB_intron_log	Natural log (mean_p_intron/mean_cb_intron)
# cb_thresh	Intron regions with at least one read in each of the five whole-cell total RNAseq replicates and cb_intron_perlen > 0.005 
# p_thresh	Intron regions with at least one read in each of the five projection total RNAseq replicates and p_intron_perlen > 0.005
#
"chr"	"start"	"end"	"strand"	"intron_id"	"ens_geneid"	"ext_geneid"	"intron_len"	"cbr1_intron"	"cbr2_intron"	"cbr3_intron"	"cbr4_intron"	"cbr5_intron"	"pr1_intron"	"pr2_intron"	"pr3_intron"	"pr4_intron"	"pr5_intron"	"polya_intron"	"ribo_intron"	"cbr1_ee"	"cbr2_ee"	"cbr3_ee"	"cbr4_ee"	"cbr5_ee"	"pr1_ee"	"pr2_ee"	"pr3_ee"	"pr4_ee"	"pr5_ee"	"polya_ee"	"ribo_ee"	"cbr1_ei"	"cbr2_ei"	"cbr3_ei"	"cbr4_ei"	"cbr5_ei"	"pr1_ei"	"pr2_ei"	"pr3_ei"	"pr4_ei"	"pr5_ei"	"polya_ei"	"ribo_ei"	"cbr1_ie"	"cbr2_ie"	"cbr3_ie"	"cbr4_ie"	"cbr5_ie"	"pr1_ie"	"pr2_ie"	"pr3_ie"	"pr4_ie"	"pr5_ie"	"polya_ie"	"ribo_ie"	"CBpas_intron"	"Ppas_intron"	"circ_num_cb"	"circ_num_p"	"mean_cb_intron"	"mean_p_intron"	"cb_intron_perlen"	"p_intron_perlen"	"mean_cb_ee"	"mean_p_ee"	"mean_cb_ei"	"mean_p_ei"	"mean_cb_ie"	"mean_p_ie"	"P_over_CB_intron_log"	"cb_thresh"	"p_thresh"
"1"	100037118	100038720	"+"	"ENSRNOG00000048901_001i"	"ENSRNOG00000048901"	"LOC103690048"	1602	0	0	0	0	0	0	0	0	0	0	0	0	0	0	0	0	0	0	0	0	0	0	0	0	0	0	0	0	0	0	0	0	0	0	0	0	0	0	0	0	0	0	0	0	0	0	0	0	0	0	NA	NA	0	0	0	0	0	0	0	0	0	0	NA	FALSE	FALSE
"1"	100038881	100039832	"+"	"ENSRNOG00000048901_002i"	"ENSRNOG00000048901"	"LOC103690048"	951	0	0	0	0	0	0	0	0	0	0	0	0	0	0	0	0	0	0	0	0	0	0	0	0	0	0	0	0	0	0	0	0	0	0	0	0	0	0	0	0	0	0	0	0	0	0	0	0	0	0	NA	NA	0	0	0	0	0	0	0	0	0	0	NA	FALSE	FALSE
"1"	100040120	100040207	"+"	"ENSRNOG00000048901_003i"	"ENSRNOG00000048901"	"LOC103690048"	87	0	0	0	0	0	0	0	0	0	0	0	0	0	0	0	0	0	0	0	0	0	0	0	0	0	0	0	0	0	0	0	0	0	0	0	0	0	0	0	0	0	0	0	0	0	0	0	0	0	0	NA	NA	0	0	0	0	0	0	0	0	0	0	NA	FALSE	FALSE
"1"	100040345	100040707	"+"	"ENSRNOG00000048901_004i"	"ENSRNOG00000048901"	"LOC103690048"	362	0	0	0	0	0	0	0	0	0	0	0	0	0	0	0	0	0	0	0	0	0	0	0	0	0	0	0	0	0	0	0	0	0	0	0	0	0	0	0	0	0	0	0	0	0	0	0	0	0	0	NA	NA	0	0	0	0	0	0	0	0	0	0	NA	FALSE	FALSE
"1"	100047281	100047908	"+"	"ENSRNOG00000045980_001i"	"ENSRNOG00000045980"	"AABR07003247.1"	627	0	0	0	0	0	0	0	0	0	0	0	0	0	0	0	0	0	0	0	0	0	0	0	0	0	0	0	0	0	0	0	0	0	0	0	0	0	0	0	0	0	0	0	0	0	0	0	0	0	0	NA	NA	0	0	0	0	0	0	0	0	0	0	NA	FALSE	FALSE
"1"	100048047	100055973	"+"	"ENSRNOG00000045980_002i"	"ENSRNOG00000045980"	"AABR07003247.1"	7926	0	0	0	0	0	0	0	0	0	0	0	0	0	0	0	0	0	0	0	0	0	0	0	0	0	0	0	0	0	0	0	0	0	0	0	0	0	0	0	0	0	0	0	0	0	0	0	0	0	0	NA	NA	0	0	0	0	0	0	0	0	0	0	NA	FALSE	FALSE
"1"	100056285	100056399	"+"	"ENSRNOG00000045980_003i"	"ENSRNOG00000045980"	"AABR07003247.1"	114	0	0	0	0	0	0	0	0	0	0	0	0	0	0	0	0	0	0	0	0	0	0	0	0	0	0	0	0	0	0	0	0	0	0	0	0	0	0	0	0	0	0	0	0	0	0	0	0	0	0	NA	NA	0	0	0	0	0	0	0	0	0	0	NA	FALSE	FALSE
"1"	100056520	100058157	"+"	"ENSRNOG00000045980_004i"	"ENSRNOG00000045980"	"AABR07003247.1"	1637	0	0	0	0	0	0	0	0	0	0	0	0	0	0	0	0	0	0	0	0	0	0	0	0	0	0	0	0	0	0	0	0	0	0	0	0	0	0	0	0	0	0	0	0	0	0	0	0	0	0	NA	NA	0	0	0	0	0	0	0	0	0	0	NA	FALSE	FALSE
"1"	100060238	100080494	"+"	"ENSRNOG00000032857_001i"	"ENSRNOG00000032857"	"Klk1b3"	20256	0	0	0	0	0	0	0	0	0	8	0	0	0	0	0	0	0	0	0	0	0	0	0	0	0	0	0	0	0	0	0	0	0	0	0	0	0	0	0	0	0	0	0	0	0	0	0	0	0	0	NA	NA	0	1.6	0	7.89889415481833e-05	0	0	0	0	0	0	Inf	FALSE	FALSE
"1"	100080657	100081419	"+"	"ENSRNOG00000032857_002i"	"ENSRNOG00000032857"	"Klk1b3"	762	0	0	0	0	0	0	0	0	0	0	0	0	0	0	0	0	0	0	0	0	0	0	0	0	0	0	0	0	0	0	0	0	0	0	0	0	0	0	0	0	0	0	0	0	0	0	0	0	0	0	NA	NA	0	0	0	0	0	0	0	0	0	0	NA	FALSE	FALSE
"1"	100081566	100086519	"+"	"ENSRNOG00000032857_003i"	"ENSRNOG00000032857"	"Klk1b3"	4953	0	0	0	0	0	0	0	0	0	0	0	0	0	0	0	0	0	0	0	0	0	0	0	0	0	0	0	0	0	0	0	0	0	0	0	0	0	0	0	0	0	0	0	0	0	0	0	0	0	0	NA	NA	0	0	0	0	0	0	0	0	0	0	NA	FALSE	FALSE
"1"	100086602	100088309	"+"	"ENSRNOG00000032857_004i"	"ENSRNOG00000032857"	"Klk1b3"	1707	0	0	0	0	0	0	0	0	0	5	0	0	0	0	0	0	0	0	0	0	0	0	0	0	0	0	0	0	0	0	0	0	0	0	0	0	0	0	0	0	0	0	0	0	0	0	0	0	0	0	NA	NA	0	1	0	0.000585823081429408	0	0	0	0	0	0	Inf	FALSE	FALSE
"1"	100088464	100089323	"+"	"ENSRNOG00000032857_005i"	"ENSRNOG00000032857"	"Klk1b3"	859	0	0	0	0	0	0	0	0	0	0	0	0	0	0	0	0	0	0	0	0	0	0	0	0	0	0	0	0	0	0	0	0	0	0	0	0	0	0	0	0	0	0	0	0	0	0	0	0	0	0	NA	NA	0	0	0	0	0	0	0	0	0	0	NA	FALSE	FALSE
"1"	100089611	100089706	"+"	"ENSRNOG00000032857_006i"	"ENSRNOG00000032857"	"Klk1b3"	95	0	0	0	0	0	0	0	0	0	9	0	0	0	0	0	0	0	0	0	0	0	0	0	0	0	0	0	0	0	0	0	0	0	0	0	0	0	0	0	0	0	0	0	0	0	9	0	0	0	0	NA	NA	0	1.8	0	0.0189473684210526	0	0	0	0	0	1.8	Inf	FALSE	FALSE
"1"	100089844	100090207	"+"	"ENSRNOG00000032857_007i"	"ENSRNOG00000032857"	"Klk1b3"	363	0	0	0	0	0	0	0	0	0	0	0	0	0	0	0	0	0	0	0	0	0	0	0	0	0	0	0	0	0	0	0	0	0	0	0	0	0	0	0	0	0	0	0	0	0	0	0	0	0	0	NA	NA	0	0	0	0	0	0	0	0	0	0	NA	FALSE	FALSE
"1"	100090407	100131448	"+"	"ENSRNOG00000032857_008i"	"ENSRNOG00000032857"	"Klk1b3"	41041	0	0	0	0	0	0	0	2	0	17	3	0	0	0	0	0	0	0	0	0	0	0	0	0	0	0	0	0	0	0	0	0	0	0	0	0	0	0	0	0	0	0	0	0	0	0	0	0	0	0	NA	NA	0	3.8	0	9.25903364927755e-05	0	0	0	0	0	0	Inf	FALSE	FALSE
"1"	100131608	100133452	"+"	"ENSRNOG00000032857_010i"	"ENSRNOG00000032857"	"Klk1b3"	1844	0	0	0	0	0	0	0	0	0	0	0	0	0	0	0	0	0	0	0	0	0	0	0	0	0	0	0	0	0	0	0	0	0	0	0	0	0	0	0	0	0	0	0	0	0	0	0	0	0	0	NA	NA	0	0	0	0	0	0	0	0	0	0	NA	FALSE	FALSE
"1"	100133613	100134520	"+"	"ENSRNOG00000032857_011i"	"ENSRNOG00000032857"	"Klk1b3"	907	0	0	0	0	0	0	0	0	0	0	0	0	0	0	0	0	0	0	0	0	3	0	0	0	0	0	0	0	0	0	0	0	0	0	0	0	0	0	0	0	0	0	0	0	0	0	0	0	0	0	NA	NA	0	0	0	0	0	0.6	0	0	0	0	NA	FALSE	FALSE
"1"	100134808	100134903	"+"	"ENSRNOG00000032857_012i"	"ENSRNOG00000032857"	"Klk1b3"	95	0	0	0	0	0	0	0	0	0	0	0	0	0	0	0	0	0	0	0	0	0	0	0	0	0	0	0	0	0	0	0	0	0	0	0	0	0	0	0	0	0	0	0	0	0	0	0	0	0	0	NA	NA	0	0	0	0	0	0	0	0	0	0	NA	FALSE	FALSE
"1"	100135041	100135400	"+"	"ENSRNOG00000032857_013i"	"ENSRNOG00000032857"	"Klk1b3"	359	0	0	0	0	0	0	0	0	0	0	0	0	0	0	0	0	0	0	0	0	0	0	0	0	0	0	0	0	0	0	0	0	0	0	0	0	0	0	0	0	0	0	0	0	0	0	0	0	0	0	NA	NA	0	0	0	0	0	0	0	0	0	0	NA	FALSE	FALSE
"1"	100135674	100199056	"+"	"ENSRNOG00000032857_015i"	"ENSRNOG00000032857"	"Klk1b3"	63382	0	0	1	0	0	5	0	0	0	12	0	0	0	0	0	0	0	0	0	0	0	0	0	0	0	0	0	0	0	0	0	0	0	0	0	0	0	0	0	0	0	0	0	0	0	0	0	0	0	0	NA	NA	0.2	3.4	3.15547000725758e-06	5.36429901233789e-05	0	0	0	0	0	0	2.83321334405622	FALSE	FALSE
"1"	100162009	100162869	"+"	"ENSRNOG00000033414_001i"	"ENSRNOG00000033414"	"Klk1c3"	860	0	0	0	0	0	0	0	0	0	0	0	0	0	0	0	0	0	0	0	0	0	0	0	0	0	0	0	0	0	0	0	0	0	0	0	0	0	0	0	0	0	0	0	0	0	0	0	0	0	0	NA	NA	0	0	0	0	0	0	0	0	0	0	NA	FALSE	FALSE
"1"	100163145	100163240	"+"	"ENSRNOG00000033414_002i"	"ENSRNOG00000033414"	"Klk1c3"	95	0	0	0	0	0	0	0	0	0	0	0	0	0	0	0	0	0	0	0	0	0	0	0	0	0	0	0	0	0	0	0	0	0	0	0	0	0	0	0	0	0	0	0	0	0	0	0	0	0	0	NA	NA	0	0	0	0	0	0	0	0	0	0	NA	FALSE	FALSE
"1"	100163378	100163740	"+"	"ENSRNOG00000033414_003i"	"ENSRNOG00000033414"	"Klk1c3"	362	0	0	0	0	0	0	0	0	0	0	0	0	0	0	0	0	0	0	0	0	0	0	0	0	0	0	0	0	0	0	0	0	0	0	0	0	0	0	0	0	0	0	0	0	0	0	0	0	0	0	NA	NA	0	0	0	0	0	0	0	0	0	0	NA	FALSE	FALSE
"1"	100164674	100164769	"+"	"ENSRNOG00000054979_001i"	"ENSRNOG00000054979"	"LOC108348116"	95	0	0	0	0	0	0	0	0	0	0	0	0	0	0	0	0	0	0	0	0	0	0	0	0	0	0	0	0	0	0	0	0	0	0	0	0	0	0	0	0	0	0	0	0	0	0	0	0	0	0	NA	NA	0	0	0	0	0	0	0	0	0	0	NA	FALSE	FALSE
"1"	100164907	100165269	"+"	"ENSRNOG00000054979_002i"	"ENSRNOG00000054979"	"LOC108348116"	362	0	0	0	0	0	0	0	0	0	0	0	0	0	0	0	0	0	0	0	0	0	0	0	0	0	0	0	0	0	0	0	0	0	0	0	0	0	0	0	0	0	0	0	0	0	0	0	0	0	0	NA	NA	0	0	0	0	0	0	0	0	0	0	NA	FALSE	FALSE
"1"	100189555	100193563	"+"	"ENSRNOG00000033805_001i"	"ENSRNOG00000033805"	"Klk15"	4008	0	0	0	0	0	0	0	0	0	0	0	0	0	0	0	0	0	0	0	0	0	0	0	0	0	0	0	0	0	0	0	0	0	0	0	0	0	0	0	0	0	0	0	0	0	0	0	0	0	0	NA	NA	0	0	0	0	0	0	0	0	0	0	NA	FALSE	FALSE
"1"	100193715	100194240	"+"	"ENSRNOG00000033805_002i"	"ENSRNOG00000033805"	"Klk15"	525	0	0	0	0	0	0	0	0	0	0	0	0	0	0	0	0	0	0	0	0	0	0	0	0	0	0	0	0	0	0	0	0	0	0	0	0	0	0	0	0	0	0	0	0	0	0	0	0	0	0	NA	NA	0	0	0	0	0	0	0	0	0	0	NA	FALSE	FALSE
"1"	100194525	100194625	"+"	"ENSRNOG00000033805_003i"	"ENSRNOG00000033805"	"Klk15"	100	0	0	0	0	0	0	0	0	0	0	0	0	0	0	0	0	0	0	0	0	0	0	0	0	0	0	0	0	0	0	0	0	0	0	0	0	0	0	0	0	0	0	0	0	0	0	0	0	0	0	NA	NA	0	0	0	0	0	0	0	0	0	0	NA	FALSE	FALSE
"1"	100194763	100196128	"+"	"ENSRNOG00000033805_004i"	"ENSRNOG00000033805"	"Klk15"	1365	0	0	0	0	0	0	0	0	0	0	0	0	0	0	0	0	0	0	0	0	0	0	0	0	0	0	0	0	0	0	0	0	0	0	0	0	0	0	0	0	0	0	0	0	0	0	0	0	0	0	NA	NA	0	0	0	0	0	0	0	0	0	0	NA	FALSE	FALSE
"1"	100199145	100201102	"+"	"ENSRNOG00000032857_016i"	"ENSRNOG00000032857"	"Klk1b3"	1957	0	0	0	0	0	0	0	0	0	1	0	0	0	0	0	0	0	0	0	0	0	0	0	0	0	0	0	0	0	0	0	0	0	0	0	0	0	0	0	0	0	0	0	0	0	0	0	0	0	0	NA	NA	0	0.2	0	0.000102197240674502	0	0	0	0	0	0	Inf	FALSE	FALSE
"1"	100201263	100202175	"+"	"ENSRNOG00000032857_017i"	"ENSRNOG00000032857"	"Klk1b3"	912	2	0	0	0	0	8	0	0	0	4	16	3	0	0	0	0	0	0	0	0	0	0	0	0	0	0	0	0	0	0	0	0	0	0	0	0	0	0	0	0	0	0	0	0	0	0	0	0	0	0	NA	NA	0.4	2.4	0.00043859649122807	0.00263157894736842	0	0	0	0	0	0	1.79175946922805	FALSE	FALSE
"1"	100202463	100202558	"+"	"ENSRNOG00000032857_018i"	"ENSRNOG00000032857"	"Klk1b3"	95	0	0	0	0	0	0	0	0	0	0	0	0	0	0	0	0	0	0	0	0	0	0	0	0	0	0	0	0	0	0	0	0	0	0	0	0	0	0	0	0	0	0	0	0	0	0	0	0	0	0	NA	NA	0	0	0	0	0	0	0	0	0	0	NA	FALSE	FALSE
"1"	100202696	100203059	"+"	"ENSRNOG00000032857_019i"	"ENSRNOG00000032857"	"Klk1b3"	363	0	0	0	0	0	0	0	0	0	0	0	0	0	0	0	0	0	0	0	0	0	0	0	0	0	0	0	0	0	0	0	0	0	0	0	0	0	0	0	0	0	0	0	0	0	0	0	0	0	0	NA	NA	0	0	0	0	0	0	0	0	0	0	NA	FALSE	FALSE
"1"	100204318	100204458	"-"	"ENSRNOG00000032170_001i"	"ENSRNOG00000032170"	"AABR07003250.1"	140	0	0	0	0	0	0	0	0	0	0	0	0	0	0	0	0	0	0	0	0	0	0	0	0	0	0	0	0	0	0	0	0	0	0	0	0	0	0	0	0	0	0	0	0	0	0	0	0	0	0	NA	NA	0	0	0	0	0	0	0	0	0	0	NA	FALSE	FALSE
"1"	100204593	100205046	"-"	"ENSRNOG00000032170_002i"	"ENSRNOG00000032170"	"AABR07003250.1"	453	0	0	0	0	0	0	0	0	0	0	3	0	0	0	0	0	0	0	0	0	0	0	0	0	0	0	0	0	0	0	0	0	0	0	0	0	0	0	0	0	0	0	0	0	0	0	3	0	0	0	NA	NA	0	0	0	0	0	0	0	0	0	0	NA	FALSE	FALSE
"1"	100224446	100224711	"+"	"ENSRNOG00000019132_001i"	"ENSRNOG00000019132"	"Fv1"	265	7	7	1	7	22	5	0	0	0	3	22	0	19	13	10	1	4	0	5	0	1	1	166	4	0	5	0	0	0	0	0	0	0	0	0	0	0	0	0	0	1	0	0	0	0	0	6	0	0	0	14	NA	8.8	1.6	0.0332075471698113	0.0060377358490566	9.4	1.4	1	0	0.2	0	-1.70474809223843	TRUE	FALSE
"1"	100224744	100225034	"+"	"ENSRNOG00000019132_002i"	"ENSRNOG00000019132"	"Fv1"	290	4	13	4	16	10	0	1	0	0	0	28	1	26	20	14	11	13	0	1	0	23	4	144	2	4	0	0	6	0	0	0	0	0	0	1	0	0	0	1	0	2	0	0	0	0	0	2	0	0	0	NA	NA	9.4	0.2	0.0324137931034483	0.000689655172413793	16.8	5.6	2	0	0.6	0	-3.85014760171006	TRUE	FALSE
"1"	100227370	100227577	"-"	"ENSRNOG00000021659_001i"	"ENSRNOG00000021659"	"Acp4"	207	0	0	3	0	0	0	0	0	0	0	0	0	0	0	0	0	0	0	0	0	0	0	0	0	0	0	0	0	0	0	0	0	0	0	0	0	0	0	3	0	0	0	0	0	0	0	0	0	0	0	NA	NA	0.6	0	0.00289855072463768	0	0	0	0	0	0.6	0	-Inf	FALSE	FALSE
"1"	100227691	100227768	"-"	"ENSRNOG00000021659_002i"	"ENSRNOG00000021659"	"Acp4"	77	0	0	0	0	0	0	0	0	0	0	0	0	0	0	0	0	0	0	0	0	0	0	0	0	0	0	0	0	0	0	0	0	0	0	0	0	0	0	0	0	0	0	0	0	0	0	0	0	0	0	NA	NA	0	0	0	0	0	0	0	0	0	0	NA	FALSE	FALSE
"1"	100227948	100228035	"-"	"ENSRNOG00000021659_003i"	"ENSRNOG00000021659"	"Acp4"	87	0	0	0	0	0	0	0	0	0	0	0	0	0	0	0	0	0	0	0	0	0	0	0	0	0	0	0	0	0	0	0	0	0	0	0	0	0	0	0	0	0	0	0	0	0	0	0	0	0	0	NA	NA	0	0	0	0	0	0	0	0	0	0	NA	FALSE	FALSE
"1"	100228164	100228532	"-"	"ENSRNOG00000021659_004i"	"ENSRNOG00000021659"	"Acp4"	368	0	0	0	0	0	0	0	0	0	0	0	0	0	0	0	0	0	0	0	0	0	0	0	0	0	0	0	0	0	0	0	0	0	0	0	0	0	0	0	0	0	0	0	0	0	0	0	0	0	0	NA	NA	0	0	0	0	0	0	0	0	0	0	NA	FALSE	FALSE
"1"	100228616	100228698	"-"	"ENSRNOG00000021659_005i"	"ENSRNOG00000021659"	"Acp4"	82	0	0	0	0	0	0	0	0	0	0	0	0	0	0	0	0	0	0	0	0	0	3	0	0	0	0	0	0	0	0	0	0	0	0	0	0	0	0	0	0	0	0	0	0	0	0	0	0	0	0	NA	NA	0	0	0	0	0	0.6	0	0	0	0	NA	FALSE	FALSE
"1"	100228832	100229451	"-"	"ENSRNOG00000021659_006i"	"ENSRNOG00000021659"	"Acp4"	619	0	0	0	0	0	0	0	0	0	0	0	0	0	0	0	0	0	0	0	0	0	0	0	0	0	0	0	0	0	0	0	0	0	0	0	0	0	0	0	0	0	0	0	0	0	0	0	0	0	0	NA	NA	0	0	0	0	0	0	0	0	0	0	NA	FALSE	FALSE
"1"	100229548	100229623	"-"	"ENSRNOG00000021659_007i"	"ENSRNOG00000021659"	"Acp4"	75	0	0	0	0	0	0	0	0	0	0	0	0	0	0	0	0	0	0	0	0	0	0	0	0	0	0	0	0	0	0	0	0	0	0	0	0	0	0	0	0	0	0	0	0	0	0	0	0	0	0	NA	NA	0	0	0	0	0	0	0	0	0	0	NA	FALSE	FALSE
"1"	100229723	100230289	"-"	"ENSRNOG00000021659_008i"	"ENSRNOG00000021659"	"Acp4"	566	0	0	0	0	0	0	0	2	0	0	1	0	0	0	0	0	0	0	0	0	0	0	0	0	0	0	0	0	0	0	0	0	0	0	0	0	0	0	0	0	0	0	0	0	0	0	0	0	0	0	NA	NA	0	0.4	0	0.000706713780918728	0	0	0	0	0	0	Inf	FALSE	FALSE
"1"	100230437	100231190	"-"	"ENSRNOG00000021659_009i"	"ENSRNOG00000021659"	"Acp4"	753	0	0	0	0	0	0	0	0	0	2	0	0	0	0	0	0	0	0	0	0	0	0	0	0	0	0	0	0	0	0	0	0	0	0	0	0	0	0	0	0	0	0	0	0	0	2	0	0	0	0	NA	NA	0	0.4	0	0.000531208499335989	0	0	0	0	0	0.4	Inf	FALSE	FALSE
"1"	100231278	100231355	"-"	"ENSRNOG00000021659_010i"	"ENSRNOG00000021659"	"Acp4"	77	0	0	0	0	0	0	0	0	0	0	0	0	0	0	0	0	0	0	0	1	0	0	0	0	0	0	0	0	0	0	0	0	0	0	0	0	0	0	0	0	0	0	0	0	0	0	0	0	0	0	NA	NA	0	0	0	0	0	0.2	0	0	0	0	NA	FALSE	FALSE
"1"	100231461	100233886	"-"	"ENSRNOG00000021659_011i"	"ENSRNOG00000021659"	"Acp4"	2425	0	0	0	0	0	0	0	0	0	1	0	0	0	0	0	0	0	0	0	0	0	0	0	0	0	0	0	0	0	0	0	0	0	0	0	0	0	0	0	0	0	0	0	0	0	0	0	0	0	0	NA	NA	0	0.2	0	8.24742268041237e-05	0	0	0	0	0	0	Inf	FALSE	FALSE
"1"	100291642	100292477	"-"	"ENSRNOG00000019138_001i"	"ENSRNOG00000019138"	"Clec11a"	835	1	0	5	5	10	0	9	0	13	2	13	0	0	3	1	3	3	3	0	0	0	0	9	0	0	0	0	0	0	0	0	0	0	0	0	0	1	0	4	0	0	0	0	0	0	0	3	0	0	0	NA	NA	4.2	4.8	0.00502994011976048	0.00574850299401198	2	0.6	0	0	1	0	0.133531392624523	FALSE	FALSE
"1"	100292670	100292904	"-"	"ENSRNOG00000019138_002i"	"ENSRNOG00000019138"	"Clec11a"	234	0	1	0	2	1	0	0	0	0	0	1	0	2	3	3	2	1	0	3	4	0	0	18	0	0	1	0	0	1	0	0	0	0	0	0	0	0	0	0	0	0	0	0	0	0	0	0	0	0	0	NA	NA	0.8	0	0.00341880341880342	0	2.2	1.4	0.4	0	0	0	-Inf	FALSE	FALSE
"1"	100293107	100293250	"-"	"ENSRNOG00000019138_003i"	"ENSRNOG00000019138"	"Clec11a"	143	0	0	0	0	0	0	0	0	0	0	1	0	0	5	0	0	0	7	0	0	0	0	0	0	0	0	0	0	0	0	0	0	0	0	0	0	0	0	0	0	0	0	0	0	0	0	0	0	0	0	NA	NA	0	0	0	0	1	1.4	0	0	0	0	NA	FALSE	FALSE
"1"	100297195	100299591	"+"	"ENSRNOG00000019207_001i"	"ENSRNOG00000019207"	"Shank1"	2396	49	57	70	449	538	10	0	0	92	49	57	0	0	0	0	0	2	0	4	0	0	0	49	1	0	0	0	0	0	0	0	0	0	0	0	0	2	0	2	10	4	0	0	0	0	0	0	0	0	0	28	NA	232.6	30.2	0.0970784641068447	0.0126043405676127	0.4	0.8	0	0	3.6	0	-2.04147831570374	TRUE	FALSE
"1"	100299890	100300050	"+"	"ENSRNOG00000019207_003i"	"ENSRNOG00000019207"	"Shank1"	160	0	0	3	7	3	0	0	0	0	0	0	0	7	5	5	6	19	9	19	1	26	16	85	1	0	0	3	3	2	0	0	0	0	0	0	0	0	0	0	0	0	0	0	0	0	0	0	0	0	0	NA	NA	2.6	0	0.01625	0	8.4	14.2	1.6	0	0	0	-Inf	FALSE	FALSE
"1"	100300255	100300665	"+"	"ENSRNOG00000019207_004i"	"ENSRNOG00000019207"	"Shank1"	410	4	0	6	24	16	0	0	0	0	0	0	0	4	10	6	9	10	3	21	10	4	9	73	2	0	0	0	0	1	0	0	0	0	0	0	0	0	0	0	2	1	0	0	0	0	0	0	0	0	0	NA	NA	10	0	0.024390243902439	0	7.8	9.4	0.2	0	0.6	0	-Inf	FALSE	FALSE
"1"	100300738	100303108	"+"	"ENSRNOG00000019207_005i"	"ENSRNOG00000019207"	"Shank1"	2370	23	8	14	60	51	0	4	0	3	9	7	0	4	1	6	2	0	6	19	0	1	3	114	8	0	0	1	15	9	0	0	0	1	0	0	0	0	0	0	0	0	0	0	0	0	0	0	0	0	0	NA	NA	31.2	3.2	0.0131645569620253	0.00135021097046414	2.6	5.8	5	0.2	0	0	-2.27726728500976	TRUE	FALSE
"1"	100303218	100303433	"+"	"ENSRNOG00000019207_006i"	"ENSRNOG00000019207"	"Shank1"	215	0	0	0	0	1	0	0	0	0	0	0	0	0	1	5	1	4	0	11	3	16	9	110	1	0	0	0	0	0	0	0	0	0	0	0	0	0	0	0	0	1	0	0	0	0	0	0	0	0	0	NA	NA	0.2	0	0.000930232558139535	0	2.2	7.8	0	0	0.2	0	-Inf	FALSE	FALSE
"1"	100303586	100306251	"+"	"ENSRNOG00000019207_007i"	"ENSRNOG00000019207"	"Shank1"	2665	16	9	9	89	65	0	0	0	1	3	0	0	4	9	5	16	8	8	18	8	7	10	139	0	0	0	0	4	8	0	0	0	0	0	0	0	0	0	0	0	0	0	0	0	0	0	0	0	0	0	NA	NA	37.6	0.8	0.014108818011257	0.000300187617260788	8.4	10.2	2.4	0	0	0	-3.85014760171006	TRUE	FALSE
"1"	100306420	100306798	"+"	"ENSRNOG00000019207_008i"	"ENSRNOG00000019207"	"Shank1"	378	0	0	0	3	4	0	0	0	0	0	0	0	3	6	3	7	1	5	9	0	2	20	198	2	0	0	0	0	0	0	0	0	0	0	0	0	0	0	0	0	0	0	0	0	0	0	0	0	0	0	NA	NA	1.4	0	0.0037037037037037	0	4	7.2	0	0	0	0	-Inf	FALSE	FALSE
"1"	100306916	100312476	"+"	"ENSRNOG00000019207_009i"	"ENSRNOG00000019207"	"Shank1"	5560	64	50	50	277	212	0	0	3	18	20	92	0	7	8	3	5	13	6	40	8	25	15	49	0	0	0	0	0	1	0	0	0	0	0	0	0	2	0	0	3	2	0	0	0	0	0	0	0	0	0	14	22	130.6	8.2	0.0234892086330935	0.00147482014388489	7.2	18.8	0.2	0	1.4	0	-2.76800506257212	TRUE	FALSE
"1"	100312555	100312795	"+"	"ENSRNOG00000019207_010i"	"ENSRNOG00000019207"	"Shank1"	240	0	0	0	0	0	0	0	0	0	0	0	0	8	14	3	16	6	14	22	1	18	10	283	2	0	0	0	0	0	0	0	0	0	0	0	0	0	0	0	0	0	0	0	0	0	0	0	0	0	0	NA	NA	0	0	0	0	9.4	13	0	0	0	0	NA	FALSE	FALSE
"1"	100312863	100313121	"+"	"ENSRNOG00000019207_011i"	"ENSRNOG00000019207"	"Shank1"	258	0	4	0	2	8	0	0	0	0	2	4	0	1	8	8	9	2	16	59	4	5	1	321	2	0	0	0	0	0	0	0	0	0	0	0	0	0	3	0	0	1	0	0	0	0	0	0	0	0	0	NA	NA	2.8	0.4	0.0108527131782946	0.00155038759689922	5.6	17	0	0	0.8	0	-1.94591014905531	FALSE	FALSE
"1"	100313453	100314201	"+"	"ENSRNOG00000019207_012i"	"ENSRNOG00000019207"	"Shank1"	748	7	6	11	21	29	0	3	3	3	10	5	1	2	4	1	2	1	0	7	0	0	1	70	2	0	4	2	13	13	0	3	3	3	2	0	0	0	0	1	0	0	0	0	0	0	0	2	0	0	0	NA	NA	14.8	3.8	0.0197860962566845	0.00508021390374332	2	1.6	6.4	2.2	0.2	0	-1.35962611403773	TRUE	FALSE
"1"	100314396	100319456	"+"	"ENSRNOG00000019207_013i"	"ENSRNOG00000019207"	"Shank1"	5060	2	3	14	20	31	7	0	0	0	7	3	0	2	5	1	0	2	3	3	0	3	1	50	0	0	0	0	0	0	0	0	0	0	0	0	0	0	0	0	0	0	0	0	0	0	0	0	0	0	0	NA	NA	14	2.8	0.00276679841897233	0.000553359683794466	2	2	0	0	0	0	-1.6094379124341	FALSE	FALSE
"1"	100319571	100319713	"+"	"ENSRNOG00000019207_014i"	"ENSRNOG00000019207"	"Shank1"	142	0	0	0	7	0	0	0	0	0	0	0	0	1	6	13	10	8	9	5	4	17	6	26	3	0	0	0	2	0	0	0	0	0	0	0	0	0	0	0	5	0	0	0	0	0	0	0	0	0	0	NA	NA	1.4	0	0.00985915492957746	0	7.6	8.2	0.4	0	1	0	-Inf	FALSE	FALSE
"1"	100319790	100320203	"+"	"ENSRNOG00000019207_015i"	"ENSRNOG00000019207"	"Shank1"	413	0	5	4	15	12	7	0	4	7	0	8	0	1	5	7	5	0	6	6	4	14	5	72	5	0	0	1	13	3	7	0	4	7	0	1	0	0	0	0	0	0	0	0	0	0	0	0	0	0	0	NA	NA	7.2	3.6	0.0174334140435835	0.00871670702179177	3.6	7	3.4	3.6	0	0	-0.693147180559945	FALSE	FALSE
"1"	100320231	100328057	"+"	"ENSRNOG00000019207_016i"	"ENSRNOG00000019207"	"Shank1"	7826	38	44	44	350	380	0	11	0	20	17	120	4	2	2	3	4	3	4	13	4	15	4	56	2	0	0	0	0	0	0	0	0	0	0	0	0	0	0	0	0	1	0	0	0	0	0	2	0	0	0	14	NA	171.2	9.6	0.0218757986199847	0.00122668029644774	2.8	8	0	0	0.2	0	-2.88106936523385	TRUE	FALSE
"1"	100328141	100328383	"+"	"ENSRNOG00000019207_017i"	"ENSRNOG00000019207"	"Shank1"	242	6	1	3	15	16	0	1	4	8	5	4	1	0	0	2	3	5	0	3	9	11	16	124	0	0	0	0	0	1	0	0	0	0	0	0	0	3	0	0	7	7	0	0	0	0	0	1	0	0	0	NA	87	8.2	3.6	0.0338842975206612	0.0148760330578512	2	7.8	0.2	0	3.4	0	-0.823200308808143	TRUE	FALSE
"1"	100328509	100329017	"+"	"ENSRNOG00000019207_018i"	"ENSRNOG00000019207"	"Shank1"	508	3	2	0	4	3	0	5	0	0	0	1	0	3	5	6	17	9	11	18	7	8	14	99	4	0	0	0	0	0	0	0	0	0	0	0	0	0	2	0	0	0	0	0	0	0	0	0	0	0	0	NA	NA	2.4	1	0.0047244094488189	0.00196850393700787	8	11.6	0	0	0.4	0	-0.8754687373539	FALSE	FALSE
"1"	100329154	100329593	"+"	"ENSRNOG00000019207_019i"	"ENSRNOG00000019207"	"Shank1"	439	1	0	1	5	12	0	0	0	0	0	1	0	3	13	7	5	7	3	37	8	25	5	88	2	0	0	0	1	0	0	0	0	0	0	0	0	0	0	0	0	0	0	0	0	0	0	0	0	0	0	NA	NA	3.8	0	0.00865603644646925	0	7	15.6	0.2	0	0	0	-Inf	FALSE	FALSE
"1"	100329675	100330228	"+"	"ENSRNOG00000019207_020i"	"ENSRNOG00000019207"	"Shank1"	553	2	6	14	61	55	0	0	0	3	0	14	0	5	5	7	7	2	6	50	6	4	0	63	0	0	0	0	0	0	0	0	0	0	0	3	0	0	0	9	2	5	0	0	0	0	0	0	0	0	0	NA	NA	27.6	0.6	0.0499095840867993	0.00108499095840868	5.2	13.2	0	0	3.2	0	-3.8286413964891	TRUE	FALSE
"1"	100330253	100330435	"+"	"ENSRNOG00000019207_021i"	"ENSRNOG00000019207"	"Shank1"	182	0	0	11	21	37	0	2	0	0	1	2	0	5	5	7	2	3	6	29	1	1	0	60	0	0	0	9	2	5	0	0	0	0	0	0	0	0	0	0	0	3	0	2	0	0	0	0	0	0	0	NA	NA	13.8	0.6	0.0758241758241758	0.0032967032967033	4.4	7.4	3.2	0	0.6	0.4	-3.13549421592915	FALSE	FALSE
"1"	100330505	100330854	"+"	"ENSRNOG00000019207_022i"	"ENSRNOG00000019207"	"Shank1"	349	1	0	1	7	14	0	0	0	0	1	0	0	0	3	2	4	5	0	13	7	25	18	281	2	0	0	1	3	4	0	0	0	0	1	0	0	0	0	0	2	1	0	0	0	0	0	0	0	0	0	NA	NA	4.6	0.2	0.0131805157593123	0.000573065902578797	2.8	12.6	1.6	0.2	0.6	0	-3.13549421592915	FALSE	FALSE
"1"	100330974	100336823	"+"	"ENSRNOG00000019207_023i"	"ENSRNOG00000019207"	"Shank1"	5849	8	6	13	75	109	0	0	0	2	7	28	0	4	4	17	17	28	5	29	10	45	11	113	1	0	0	0	0	2	0	0	0	0	0	0	0	0	0	2	0	0	0	0	0	0	0	0	0	0	0	NA	NA	42.2	1.8	0.00721490853137288	0.000307744913660455	14	20	0.4	0	0.4	0	-3.15463355613985	TRUE	FALSE
"1"	100336921	100337443	"+"	"ENSRNOG00000019207_024i"	"ENSRNOG00000019207"	"Shank1"	522	1	1	0	4	2	5	0	0	0	2	0	0	12	14	11	61	67	30	65	9	201	145	63	3	0	0	0	0	0	0	0	0	0	0	0	0	0	0	0	1	1	0	0	0	0	2	0	0	0	0	NA	NA	1.6	1.4	0.00306513409961686	0.00268199233716475	33	90	0	0	0.4	0.4	-0.133531392624523	FALSE	FALSE
"1"	100340532	100342667	"+"	"ENSRNOG00000019207_025i"	"ENSRNOG00000019207"	"Shank1"	2135	33	17	27	174	120	22	114	38	340	200	1649	7	2	8	2	29	33	6	20	4	49	52	175	1	0	0	0	0	0	0	0	0	0	0	0	0	0	2	0	21	10	0	0	0	53	19	45	0	0	0	NA	NA	74.2	142.8	0.0347540983606557	0.0668852459016394	14.8	26.2	0	0	6.6	14.4	0.654680899732149	TRUE	TRUE
"1"	100346625	100347272	"-"	"ENSRNOG00000037298_001i"	"ENSRNOG00000037298"	"RGD1309036"	647	0	0	0	1	0	0	0	0	0	0	13	1	0	0	0	0	0	0	0	0	0	0	0	0	0	0	0	0	0	0	0	0	0	0	0	0	0	0	0	1	0	0	0	0	0	0	1	0	0	0	NA	NA	0.2	0	0.000309119010819165	0	0	0	0	0	0.2	0	-Inf	FALSE	FALSE
"1"	100347407	100348416	"-"	"ENSRNOG00000037298_002i"	"ENSRNOG00000037298"	"RGD1309036"	1009	0	0	0	0	0	0	0	0	0	0	3	0	0	0	0	0	0	0	0	0	0	0	0	0	0	0	0	0	0	0	0	0	0	0	0	0	0	0	0	0	0	0	0	0	0	0	0	0	0	0	NA	NA	0	0	0	0	0	0	0	0	0	0	NA	FALSE	FALSE
"1"	100348538	100348690	"-"	"ENSRNOG00000037298_003i"	"ENSRNOG00000037298"	"RGD1309036"	152	0	0	1	2	1	0	0	0	0	0	0	0	0	0	0	1	2	0	0	0	0	0	1	0	0	0	0	2	1	0	0	0	0	0	0	0	0	0	0	0	0	0	0	0	0	0	0	0	0	0	NA	NA	0.8	0	0.00526315789473684	0	0.6	0	0.6	0	0	0	-Inf	FALSE	FALSE
"1"	100348758	100359159	"-"	"ENSRNOG00000037298_004i"	"ENSRNOG00000037298"	"RGD1309036"	10401	3	25	12	43	52	1	8	6	14	30	191	9	0	0	0	0	0	0	0	0	0	0	0	0	0	0	0	6	0	0	0	0	0	0	0	0	0	0	0	0	0	0	0	0	0	0	0	0	0	0	NA	NA	27	11.8	0.00259590423997693	0.0011345062974714	0	0	1.2	0	0	0	-0.82773733453271	FALSE	FALSE
"1"	100379255	100393302	"+"	"ENSRNOG00000019318_001i"	"ENSRNOG00000019318"	"Syt3"	14047	3	9	2	8	12	0	0	0	0	0	82	4	0	0	0	0	0	0	0	0	0	0	0	0	0	0	0	0	0	0	0	0	0	0	0	0	0	0	0	0	0	0	0	0	0	0	6	0	0	0	NA	NA	6.8	0	0.000484089129351463	0	0	0	0	0	0	0	-Inf	FALSE	FALSE
"1"	100394020	100395082	"+"	"ENSRNOG00000019318_005i"	"ENSRNOG00000019318"	"Syt3"	1062	10	16	10	92	125	0	4	8	36	43	47	7	9	6	10	1	1	0	16	2	0	0	37	2	0	0	3	0	4	0	0	0	0	0	1	0	0	0	0	0	2	0	0	0	7	0	0	0	0	0	NA	NA	50.6	18.2	0.0476459510357815	0.0171374764595104	5.4	3.6	1.4	0	0.4	1.4	-1.02252998221067	TRUE	FALSE
"1"	100395254	100398833	"+"	"ENSRNOG00000019318_006i"	"ENSRNOG00000019318"	"Syt3"	3579	6	5	11	21	42	0	0	0	0	2	6	0	6	4	0	6	16	0	0	4	7	3	42	6	0	0	0	0	2	0	0	0	0	0	0	0	0	0	0	0	0	0	0	0	0	0	0	0	0	0	NA	NA	17	0.4	0.00474993014808606	0.000111763062307907	6.4	2.8	0.4	0	0	0	-3.74950407593037	FALSE	FALSE
"1"	100399608	100400838	"+"	"ENSRNOG00000019318_008i"	"ENSRNOG00000019318"	"Syt3"	1230	3	4	4	13	15	0	0	0	0	0	37	0	33	34	35	28	30	10	5	14	10	5	191	4	0	0	0	0	0	0	0	0	0	0	0	0	0	0	0	3	3	0	0	0	0	0	3	0	0	0	NA	NA	7.8	0	0.00634146341463415	0	32	8.8	0	0	1.2	0	-Inf	TRUE	FALSE
"1"	100401215	100401824	"+"	"ENSRNOG00000019318_009i"	"ENSRNOG00000019318"	"Syt3"	609	0	0	0	0	2	0	0	0	0	0	0	0	0	2	0	3	2	0	3	0	0	4	104	1	0	0	0	0	0	0	0	0	0	0	0	0	0	0	0	0	1	0	0	0	0	0	0	0	0	0	NA	NA	0.4	0	0.000656814449917898	0	1.4	1.4	0	0	0.2	0	-Inf	FALSE	FALSE
"1"	100402044	100403976	"+"	"ENSRNOG00000019318_010i"	"ENSRNOG00000019318"	"Syt3"	1932	7	2	5	62	66	0	0	0	3	1	4	1	12	27	34	19	38	1	4	2	2	1	72	0	0	0	1	5	2	0	0	0	0	0	0	0	0	0	0	0	0	0	0	0	0	0	0	0	0	0	NA	NA	28.4	0.8	0.0146997929606625	0.00041407867494824	26	2	1.6	0	0	0	-3.56953269648137	TRUE	FALSE
"1"	100404098	100404208	"+"	"ENSRNOG00000019318_011i"	"ENSRNOG00000019318"	"Syt3"	110	0	0	0	0	0	0	0	0	0	0	5	0	40	44	45	26	31	10	16	6	0	11	85	1	0	0	0	0	0	0	0	0	0	0	5	0	0	0	0	0	0	0	0	0	0	0	0	0	0	0	NA	NA	0	0	0	0	37.2	8.6	0	0	0	0	NA	FALSE	FALSE
"1"	100404381	100404471	"+"	"ENSRNOG00000019318_012i"	"ENSRNOG00000019318"	"Syt3"	90	0	0	0	0	0	0	0	0	0	0	0	0	8	14	7	4	4	0	0	0	10	4	67	2	0	0	0	0	0	0	0	0	0	0	0	0	0	0	0	0	0	0	0	0	0	0	0	0	0	0	NA	NA	0	0	0	0	7.4	2.8	0	0	0	0	NA	FALSE	FALSE
"1"	100404605	100407126	"+"	"ENSRNOG00000019318_013i"	"ENSRNOG00000019318"	"Syt3"	2521	0	2	7	11	10	3	0	0	2	0	22	1	9	6	7	8	2	17	0	4	0	1	37	0	0	0	0	0	0	0	0	0	0	0	1	0	0	0	0	0	0	0	0	0	0	0	0	0	0	0	NA	NA	6	1	0.00238000793335978	0.000396667988893296	6.4	4.4	0	0	0	0	-1.79175946922805	FALSE	FALSE
"1"	100407195	100407365	"+"	"ENSRNOG00000019318_014i"	"ENSRNOG00000019318"	"Syt3"	170	0	0	0	0	0	0	0	0	0	0	7	0	2	5	12	12	7	0	0	1	0	5	216	0	0	0	0	0	0	0	0	0	0	0	0	0	0	0	0	0	0	0	0	0	0	0	5	0	0	0	NA	NA	0	0	0	0	7.6	1.2	0	0	0	0	NA	FALSE	FALSE
"1"	100448043	100450257	"+"	"ENSRNOG00000019418_001i"	"ENSRNOG00000019418"	"Lrrc4b"	2214	13	18	16	63	73	9	0	0	0	0	35	7	18	23	23	21	23	6	0	0	7	3	280	27	0	0	0	0	0	0	0	0	0	0	0	0	0	2	0	1	4	0	0	0	0	0	1	0	0	0	NA	NA	36.6	1.8	0.0165311653116531	0.000813008130081301	21.6	3.2	0	0	1.4	0	-3.0122615755052	TRUE	FALSE
"1"	100450596	100466553	"+"	"ENSRNOG00000019418_002i"	"ENSRNOG00000019418"	"Lrrc4b"	15957	70	90	84	275	361	9	8	0	2	11	421	1	37	42	19	7	14	2	14	1	0	6	497	11	5	0	0	11	17	8	0	0	1	0	0	0	0	0	0	2	0	0	0	0	0	0	1	0	0	0	14	NA	176	6	0.0110296421633139	0.000376010528294792	23.8	4.6	6.6	1.8	0.4	0	-3.3787245258101	TRUE	FALSE
"1"	100471150	100471682	"+"	"ENSRNOG00000019424_002i"	"ENSRNOG00000019424"	"Aspdh"	532	10	10	4	113	145	0	11	2	72	78	231	0	0	0	0	0	0	0	4	0	0	0	0	0	1	1	3	12	18	0	8	0	0	6	17	0	4	5	0	2	3	0	0	0	1	0	19	0	0	0	NA	NA	56.4	32.6	0.106015037593985	0.0612781954887218	0	0.8	7	2.8	2.8	0.2	-0.548156870131351	TRUE	FALSE
"1"	100471828	100472061	"+"	"ENSRNOG00000019424_003i"	"ENSRNOG00000019424"	"Aspdh"	233	3	3	2	14	14	0	3	0	6	5	157	0	0	0	0	0	0	3	4	0	0	0	3	0	3	1	2	0	3	0	0	0	0	2	13	0	0	2	0	1	2	0	3	0	0	0	11	0	0	0	NA	NA	7.2	2.8	0.0309012875536481	0.0120171673819742	0	1.4	1.8	0.4	1	0.6	-0.944461608840852	TRUE	FALSE
"1"	100472147	100472235	"+"	"ENSRNOG00000019424_004i"	"ENSRNOG00000019424"	"Aspdh"	88	0	4	2	9	7	0	0	0	0	0	121	0	0	0	0	0	0	0	4	0	0	0	7	0	0	4	0	8	3	0	0	0	0	0	42	0	0	2	2	1	4	0	0	0	0	0	40	0	0	0	NA	NA	4.4	0	0.05	0	0	0.8	3	0	1.8	0	-Inf	FALSE	FALSE
"1"	100472386	100472463	"+"	"ENSRNOG00000019424_005i"	"ENSRNOG00000019424"	"Aspdh"	77	0	2	1	13	10	0	0	0	0	1	106	0	0	0	0	0	0	0	4	0	0	0	4	0	0	2	0	12	8	0	0	0	0	1	22	0	0	0	1	1	3	0	0	0	0	0	24	0	0	0	NA	NA	5.2	0.2	0.0675324675324675	0.0025974025974026	0	0.8	4.4	0.2	1	0	-3.25809653802148	FALSE	FALSE
"1"	100472685	100472757	"+"	"ENSRNOG00000019424_006i"	"ENSRNOG00000019424"	"Aspdh"	72	2	0	2	5	2	0	0	0	2	0	108	0	0	0	0	1	2	0	4	0	0	0	15	0	1	0	0	4	1	0	0	0	0	0	35	0	2	0	2	3	1	0	0	0	2	0	40	0	0	0	NA	NA	2.2	0.4	0.0305555555555556	0.00555555555555556	0.6	0.8	1.2	0	1.6	0.4	-1.70474809223843	FALSE	FALSE
"1"	100472913	100473217	"+"	"ENSRNOG00000019424_009i"	"ENSRNOG00000019424"	"Aspdh"	304	9	15	9	36	66	1	0	0	49	36	152	0	0	3	1	8	6	4	4	0	0	1	3	0	0	0	1	4	5	0	0	0	0	2	38	0	0	6	6	15	17	1	0	0	14	14	13	0	0	0	NA	NA	27	17.2	0.0888157894736842	0.056578947368421	3.6	1.8	2	0.4	8.8	5.8	-0.450927482184922	TRUE	FALSE
"1"	100473763	100474362	"+"	"ENSRNOG00000019442_001i"	"ENSRNOG00000019442"	"Josd2"	599	7	11	5	3	8	0	0	0	0	0	35	1	2	5	2	0	0	5	4	4	0	2	19	1	0	0	0	0	0	0	0	0	0	0	2	0	4	1	1	1	6	0	0	0	0	0	0	0	0	0	NA	NA	6.8	0	0.0113522537562604	0	1.8	3	0	0	2.6	0	-Inf	TRUE	FALSE
"1"	100474526	100476128	"+"	"ENSRNOG00000019442_002i"	"ENSRNOG00000019442"	"Josd2"	1602	25	38	24	77	99	13	2	20	31	25	165	4	4	3	4	4	4	0	4	5	0	2	7	1	0	3	2	7	12	4	0	5	5	8	11	0	0	0	0	0	1	0	0	0	0	0	15	0	0	0	14	NA	52.6	18.2	0.0328339575530587	0.0113607990012484	3.8	2.2	4.8	4.4	0.2	0	-1.06129452566091	TRUE	TRUE
"1"	100476255	100476804	"+"	"ENSRNOG00000019442_003i"	"ENSRNOG00000019442"	"Josd2"	549	5	1	9	9	5	0	0	1	15	8	77	0	13	12	7	47	25	9	11	4	17	18	21	0	2	0	2	0	0	0	0	0	0	6	2	0	1	1	2	4	1	0	0	1	0	2	17	0	0	0	NA	NA	5.8	4.8	0.0105646630236794	0.0087431693989071	20.8	11.8	0.8	1.2	1.8	0.6	-0.189241999638528	TRUE	FALSE
"1"	100477000	100477105	"+"	"ENSRNOG00000019442_004i"	"ENSRNOG00000019442"	"Josd2"	105	0	0	0	1	1	0	0	0	2	0	2	0	0	4	0	0	2	3	4	2	0	0	10	3	0	0	0	1	1	0	0	0	0	0	0	0	0	0	0	0	0	0	0	0	2	0	1	0	0	0	NA	NA	0.4	0.4	0.00380952380952381	0.00380952380952381	1.2	1.8	0.4	0	0	0.4	0	FALSE	FALSE
"1"	100495983	100496933	"-"	"ENSRNOG00000019532_001i"	"ENSRNOG00000019532"	"Emc10"	950	8	18	16	43	42	5	0	0	3	1	177	13	0	4	0	7	5	0	0	0	1	0	57	9	0	1	3	1	0	0	0	0	0	0	0	0	0	1	1	0	0	0	0	0	0	0	0	0	0	0	NA	NA	25.4	1.8	0.0267368421052632	0.00189473684210526	3.2	0.2	1	0	0.4	0	-2.64696250912237	TRUE	FALSE
"1"	100497028	100497121	"-"	"ENSRNOG00000019532_002i"	"ENSRNOG00000019532"	"Emc10"	93	0	0	0	5	6	0	0	0	0	0	0	0	8	15	9	18	14	5	6	5	4	3	199	7	0	0	0	5	3	0	0	0	0	0	0	0	0	0	0	0	3	0	0	0	0	0	0	0	0	0	NA	NA	2.2	0	0.0236559139784946	0	12.8	4.6	1.6	0	0.6	0	-Inf	FALSE	FALSE
"1"	100497304	100497530	"-"	"ENSRNOG00000019532_003i"	"ENSRNOG00000019532"	"Emc10"	226	2	0	5	2	2	0	0	0	0	0	1	0	10	21	5	5	8	0	3	5	0	0	196	19	0	0	3	1	1	0	0	0	0	0	0	0	0	0	2	1	1	0	0	0	0	0	0	0	0	0	NA	NA	2.2	0	0.00973451327433628	0	9.8	1.6	1	0	0.8	0	-Inf	FALSE	FALSE
"1"	100497636	100498252	"-"	"ENSRNOG00000019532_004i"	"ENSRNOG00000019532"	"Emc10"	616	4	10	8	9	12	0	0	0	0	0	20	0	21	23	19	15	26	0	11	4	8	14	222	4	2	4	0	1	1	0	0	0	0	0	8	0	1	0	1	0	3	0	0	0	0	0	0	0	0	0	NA	NA	8.6	0	0.013961038961039	0	20.8	7.4	1.6	0	1	0	-Inf	TRUE	FALSE
"1"	100498363	100499917	"-"	"ENSRNOG00000019532_005i"	"ENSRNOG00000019532"	"Emc10"	1554	44	45	50	107	90	11	1	0	3	1	242	0	18	27	21	10	9	4	12	8	0	0	260	13	5	2	4	0	1	0	0	0	0	0	0	0	0	5	1	5	5	0	1	0	0	0	12	0	0	0	NA	NA	67.2	3.2	0.0432432432432432	0.00205920205920206	17	4.8	2.4	0	3.2	0.2	-3.04452243772342	TRUE	FALSE
"1"	100499991	100501240	"-"	"ENSRNOG00000019532_006i"	"ENSRNOG00000019532"	"Emc10"	1249	12	7	5	4	7	0	0	0	0	0	1	0	16	12	15	26	34	0	9	0	1	3	60	13	0	0	0	0	0	0	0	0	0	0	0	0	0	0	0	3	2	0	0	0	0	0	0	0	0	0	NA	NA	7	0	0.0056044835868695	0	20.6	2.6	0	0	1	0	-Inf	TRUE	FALSE
"1"	100501719	100501902	"+"	"ENSRNOG00000031739_001i"	"ENSRNOG00000031739"	"Fam71e1"	183	0	10	2	6	2	0	0	0	2	0	6	0	2	1	2	5	2	3	10	2	0	0	1	0	0	0	0	0	0	0	0	0	0	0	0	0	0	10	2	3	2	0	0	0	2	0	0	0	0	0	NA	NA	4	0.4	0.0218579234972678	0.00218579234972678	2.4	3	0	0	3.4	0.4	-2.30258509299405	FALSE	FALSE
"1"	100502022	100502467	"+"	"ENSRNOG00000031739_002i"	"ENSRNOG00000031739"	"Fam71e1"	445	26	17	16	22	33	1	0	4	0	0	20	2	0	4	3	1	0	5	0	7	0	0	0	0	7	0	5	4	7	1	0	4	0	0	4	0	0	2	0	0	0	0	0	0	0	0	1	0	0	0	NA	NA	22.8	1	0.0512359550561798	0.00224719101123596	1.6	2.4	4.6	1	0.4	0	-3.1267605359604	TRUE	FALSE
"1"	100502599	100505154	"+"	"ENSRNOG00000031739_003i"	"ENSRNOG00000031739"	"Fam71e1"	2555	60	100	46	101	100	11	3	0	0	7	66	0	0	2	2	8	0	5	6	1	7	0	0	0	14	19	8	28	9	7	0	0	0	2	0	0	0	3	0	0	7	0	0	0	0	0	4	0	0	0	NA	NA	81.4	4.2	0.0318590998043053	0.00164383561643836	2.4	3.8	15.6	1.8	2	0	-2.96429074771917	TRUE	FALSE
"1"	100505426	100505965	"+"	"ENSRNOG00000031739_004i"	"ENSRNOG00000031739"	"Fam71e1"	539	22	25	22	28	31	2	12	2	1	5	59	0	0	0	3	3	7	3	16	1	5	11	0	0	2	6	2	1	3	0	10	2	0	0	3	0	4	3	6	11	12	0	0	0	1	1	3	0	0	0	NA	NA	25.6	4.4	0.0474953617810761	0.00816326530612245	2.6	7.2	2.8	2.4	7.2	0.4	-1.7609878105613	TRUE	TRUE
"1"	100506844	100508428	"-"	"ENSRNOG00000019627_001i"	"ENSRNOG00000019627"	"Mybpc2"	1584	0	0	0	0	0	0	0	0	0	0	1	0	0	0	0	0	0	0	0	0	0	0	0	0	0	0	0	0	0	0	0	0	0	0	0	0	0	0	0	0	0	0	0	0	0	0	0	0	0	0	NA	NA	0	0	0	0	0	0	0	0	0	0	NA	FALSE	FALSE
"1"	100508616	100509858	"-"	"ENSRNOG00000019627_002i"	"ENSRNOG00000019627"	"Mybpc2"	1242	0	0	0	0	0	0	0	0	0	0	0	0	0	0	2	0	0	0	2	0	0	0	0	0	0	0	0	0	0	0	0	0	0	0	0	0	0	0	0	0	0	0	0	0	0	0	0	0	0	0	NA	NA	0	0	0	0	0.4	0.4	0	0	0	0	NA	FALSE	FALSE
"1"	100509996	100510080	"-"	"ENSRNOG00000019627_003i"	"ENSRNOG00000019627"	"Mybpc2"	84	0	0	0	0	0	0	0	0	0	0	0	0	0	0	3	0	0	0	0	0	0	0	0	0	0	0	0	0	0	0	0	0	0	0	0	0	0	0	0	0	0	0	0	0	0	0	0	0	0	0	NA	NA	0	0	0	0	0.6	0	0	0	0	0	NA	FALSE	FALSE
"1"	100510241	100510418	"-"	"ENSRNOG00000019627_004i"	"ENSRNOG00000019627"	"Mybpc2"	177	0	0	0	0	0	0	0	0	0	0	0	0	0	0	0	4	0	0	0	0	1	0	0	0	0	0	0	0	0	0	0	0	0	0	0	0	0	0	0	0	0	0	0	0	0	0	0	0	0	0	NA	NA	0	0	0	0	0.8	0.2	0	0	0	0	NA	FALSE	FALSE
"1"	100510559	100510943	"-"	"ENSRNOG00000019627_005i"	"ENSRNOG00000019627"	"Mybpc2"	384	0	0	0	0	0	0	0	0	0	0	0	0	0	0	0	0	0	0	0	0	0	0	0	0	0	0	0	0	0	0	0	0	0	0	0	0	0	0	0	0	0	0	0	0	0	0	0	0	0	0	NA	NA	0	0	0	0	0	0	0	0	0	0	NA	FALSE	FALSE
"1"	100511140	100511568	"-"	"ENSRNOG00000019627_006i"	"ENSRNOG00000019627"	"Mybpc2"	428	0	0	0	0	0	0	0	0	0	0	0	0	0	0	0	0	0	0	0	0	0	0	0	0	0	0	0	0	0	0	0	0	0	0	0	0	0	0	0	0	0	0	0	0	0	0	0	0	0	0	NA	NA	0	0	0	0	0	0	0	0	0	0	NA	FALSE	FALSE
"1"	100511658	100511792	"-"	"ENSRNOG00000019627_007i"	"ENSRNOG00000019627"	"Mybpc2"	134	0	0	0	0	0	0	0	0	0	0	0	0	0	0	0	0	0	0	3	0	0	0	0	0	0	0	0	0	0	0	0	0	0	0	0	0	0	0	0	0	0	0	0	0	0	0	0	0	0	0	NA	NA	0	0	0	0	0	0.6	0	0	0	0	NA	FALSE	FALSE
"1"	100511961	100513019	"-"	"ENSRNOG00000019627_008i"	"ENSRNOG00000019627"	"Mybpc2"	1058	0	0	0	0	0	0	0	0	0	0	0	0	0	0	0	0	0	0	0	0	0	0	0	0	0	0	0	0	0	0	0	0	0	0	0	0	0	0	0	0	0	0	0	0	0	0	0	0	0	0	NA	NA	0	0	0	0	0	0	0	0	0	0	NA	FALSE	FALSE
"1"	100513155	100513720	"-"	"ENSRNOG00000019627_009i"	"ENSRNOG00000019627"	"Mybpc2"	565	0	0	0	0	0	0	0	0	0	1	0	0	0	0	0	0	0	0	0	0	0	0	0	0	0	0	0	0	0	0	0	0	0	0	0	0	0	0	0	0	0	0	0	0	0	0	0	0	0	0	NA	NA	0	0.2	0	0.000353982300884956	0	0	0	0	0	0	Inf	FALSE	FALSE
"1"	100513910	100514318	"-"	"ENSRNOG00000019627_010i"	"ENSRNOG00000019627"	"Mybpc2"	408	0	0	0	0	0	0	0	0	0	0	0	0	0	0	0	0	0	0	0	0	0	0	0	0	0	0	0	0	0	0	0	0	0	0	0	0	0	0	0	0	0	0	0	0	0	0	0	0	0	0	NA	NA	0	0	0	0	0	0	0	0	0	0	NA	FALSE	FALSE
"1"	100514424	100514515	"-"	"ENSRNOG00000019627_011i"	"ENSRNOG00000019627"	"Mybpc2"	91	0	0	0	0	0	0	0	0	0	0	0	0	0	0	0	0	0	0	0	0	0	0	0	0	0	0	0	0	0	0	0	0	0	0	0	0	0	0	0	0	0	0	0	0	0	0	0	0	0	0	NA	NA	0	0	0	0	0	0	0	0	0	0	NA	FALSE	FALSE
"1"	100514676	100516687	"-"	"ENSRNOG00000019627_012i"	"ENSRNOG00000019627"	"Mybpc2"	2011	0	0	0	0	0	0	0	0	0	1	0	0	0	0	0	0	0	0	0	0	0	0	3	0	0	0	0	0	0	0	0	0	0	0	0	0	0	0	0	0	0	0	0	0	0	0	0	0	0	0	NA	NA	0	0.2	0	9.94530084535057e-05	0	0	0	0	0	0	Inf	FALSE	FALSE
"1"	100516828	100516960	"-"	"ENSRNOG00000019627_013i"	"ENSRNOG00000019627"	"Mybpc2"	132	0	0	0	0	0	0	0	0	0	0	0	0	0	0	0	0	0	0	0	0	0	0	0	0	0	0	0	0	0	0	0	0	0	0	0	0	0	0	0	0	0	0	0	0	0	0	0	0	0	0	NA	NA	0	0	0	0	0	0	0	0	0	0	NA	FALSE	FALSE
"1"	100516991	100517331	"-"	"ENSRNOG00000019627_014i"	"ENSRNOG00000019627"	"Mybpc2"	340	0	0	0	0	0	0	0	0	0	0	0	0	2	0	0	0	0	0	0	0	0	0	0	0	0	0	0	0	0	0	0	0	0	0	0	0	0	0	0	0	0	0	0	0	0	0	0	0	0	0	NA	NA	0	0	0	0	0.4	0	0	0	0	0	NA	FALSE	FALSE
"1"	100517439	100518713	"-"	"ENSRNOG00000019627_015i"	"ENSRNOG00000019627"	"Mybpc2"	1274	0	0	0	1	0	0	0	0	0	0	0	0	0	0	0	0	0	0	0	0	0	0	0	0	0	0	0	0	0	0	0	0	0	0	0	0	0	0	0	0	0	0	0	0	0	0	0	0	0	0	NA	NA	0.2	0	0.000156985871271586	0	0	0	0	0	0	0	-Inf	FALSE	FALSE
"1"	100518880	100519843	"-"	"ENSRNOG00000019627_016i"	"ENSRNOG00000019627"	"Mybpc2"	963	0	0	0	0	0	0	0	1	0	0	0	0	0	0	0	0	0	0	0	0	0	0	0	0	0	0	0	0	0	0	0	0	0	0	0	0	0	0	0	0	0	0	0	0	0	0	0	0	0	0	NA	NA	0	0.2	0	0.000207684319833853	0	0	0	0	0	0	Inf	FALSE	FALSE
"1"	100520017	100520924	"-"	"ENSRNOG00000019627_017i"	"ENSRNOG00000019627"	"Mybpc2"	907	0	0	0	0	0	0	0	0	0	0	0	0	0	0	0	0	0	0	0	0	0	0	0	0	0	0	0	0	0	0	0	0	0	0	0	0	0	0	0	0	0	0	0	0	0	0	0	0	0	0	NA	NA	0	0	0	0	0	0	0	0	0	0	NA	FALSE	FALSE
"1"	100521031	100521259	"-"	"ENSRNOG00000019627_018i"	"ENSRNOG00000019627"	"Mybpc2"	228	0	0	0	0	0	0	0	0	0	0	0	0	0	0	0	0	0	0	0	0	0	0	0	0	0	0	0	0	0	0	0	0	0	0	0	0	0	0	0	0	0	0	0	0	0	0	0	0	0	0	NA	NA	0	0	0	0	0	0	0	0	0	0	NA	FALSE	FALSE
"1"	100521385	100521499	"-"	"ENSRNOG00000019627_019i"	"ENSRNOG00000019627"	"Mybpc2"	114	0	0	0	0	0	0	0	0	0	0	0	0	0	0	0	0	0	0	0	0	0	0	0	0	0	0	0	0	0	0	0	0	0	0	0	0	0	0	0	0	0	0	0	0	0	0	0	0	0	0	NA	NA	0	0	0	0	0	0	0	0	0	0	NA	FALSE	FALSE
"1"	100521633	100521933	"-"	"ENSRNOG00000019627_020i"	"ENSRNOG00000019627"	"Mybpc2"	300	0	0	0	0	0	0	0	0	0	0	0	0	0	0	0	0	0	0	0	0	0	0	0	0	0	0	0	0	0	0	0	0	0	0	0	0	0	0	0	0	0	0	0	0	0	0	0	0	0	0	NA	NA	0	0	0	0	0	0	0	0	0	0	NA	FALSE	FALSE
"1"	100522128	100525847	"-"	"ENSRNOG00000019627_021i"	"ENSRNOG00000019627"	"Mybpc2"	3719	0	0	0	0	0	0	0	0	0	1	2	0	0	0	0	0	0	0	0	0	0	0	0	0	0	0	0	0	0	0	0	0	0	0	0	0	0	0	0	0	0	0	0	0	0	0	0	0	0	0	NA	NA	0	0.2	0	5.37778972842162e-05	0	0	0	0	0	0	Inf	FALSE	FALSE
"1"	100525908	100526051	"-"	"ENSRNOG00000019627_022i"	"ENSRNOG00000019627"	"Mybpc2"	143	0	0	0	0	0	0	0	0	0	0	0	0	3	0	0	0	0	0	0	4	0	0	0	0	0	0	0	0	0	0	0	0	0	0	0	0	0	0	0	0	0	0	0	0	0	0	0	0	0	0	NA	NA	0	0	0	0	0.6	0.8	0	0	0	0	NA	FALSE	FALSE
"1"	100526101	100527126	"-"	"ENSRNOG00000019627_023i"	"ENSRNOG00000019627"	"Mybpc2"	1025	0	0	0	0	0	0	0	0	0	0	0	0	0	0	0	0	0	0	0	0	0	0	0	0	0	0	0	0	0	0	0	0	0	0	0	0	0	0	0	0	0	0	0	0	0	0	0	0	0	0	NA	NA	0	0	0	0	0	0	0	0	0	0	NA	FALSE	FALSE
"1"	100527245	100527390	"-"	"ENSRNOG00000019627_024i"	"ENSRNOG00000019627"	"Mybpc2"	145	0	0	0	0	0	0	0	0	0	0	0	0	0	0	0	0	0	0	0	0	0	0	0	0	0	0	0	0	0	0	0	0	0	0	0	0	0	0	0	0	0	0	0	0	0	0	0	0	0	0	NA	NA	0	0	0	0	0	0	0	0	0	0	NA	FALSE	FALSE
"1"	100527585	100527771	"-"	"ENSRNOG00000019627_025i"	"ENSRNOG00000019627"	"Mybpc2"	186	0	0	0	0	0	0	0	0	0	0	0	0	0	0	0	0	0	0	7	0	0	0	0	0	0	0	0	0	0	0	0	0	0	0	0	0	0	0	0	0	0	0	0	0	0	0	0	0	0	0	NA	NA	0	0	0	0	0	1.4	0	0	0	0	NA	FALSE	FALSE
"1"	100527859	100528262	"-"	"ENSRNOG00000019627_026i"	"ENSRNOG00000019627"	"Mybpc2"	403	0	0	0	0	0	0	0	0	0	0	0	0	0	0	0	0	0	0	3	0	0	0	0	0	0	0	0	0	0	0	0	0	0	0	0	0	0	0	0	0	0	0	0	0	0	0	0	0	0	0	NA	NA	0	0	0	0	0	0.6	0	0	0	0	NA	FALSE	FALSE
"1"	100528347	100530097	"-"	"ENSRNOG00000019627_027i"	"ENSRNOG00000019627"	"Mybpc2"	1750	0	0	0	0	1	0	0	0	0	2	0	0	0	0	0	0	0	0	0	0	0	0	0	0	0	0	0	0	0	0	0	0	0	0	0	0	0	0	0	0	0	0	0	0	0	0	0	0	0	0	NA	NA	0.2	0.4	0.000114285714285714	0.000228571428571429	0	0	0	0	0	0	0.693147180559945	FALSE	FALSE
"1"	100533585	100534179	"-"	"ENSRNOG00000019660_001i"	"ENSRNOG00000019660"	"Spib"	594	0	0	0	0	0	0	0	3	0	0	0	0	0	0	0	0	0	0	0	0	0	0	0	0	0	0	0	0	0	0	0	0	0	0	0	0	0	0	0	0	0	0	0	0	0	0	0	0	0	0	NA	NA	0	0.6	0	0.00101010101010101	0	0	0	0	0	0	Inf	FALSE	FALSE
"1"	100534331	100534709	"-"	"ENSRNOG00000019660_002i"	"ENSRNOG00000019660"	"Spib"	378	0	0	0	0	0	0	0	0	0	0	0	0	0	0	0	0	0	0	0	0	0	0	0	0	0	0	0	0	0	0	0	0	0	0	0	0	0	0	0	0	0	0	0	0	0	0	0	0	0	0	NA	NA	0	0	0	0	0	0	0	0	0	0	NA	FALSE	FALSE
"1"	100534943	100535193	"-"	"ENSRNOG00000019660_003i"	"ENSRNOG00000019660"	"Spib"	250	0	0	0	0	0	0	0	0	0	0	0	0	0	0	0	0	0	0	0	0	0	0	0	0	0	0	0	0	0	0	0	0	0	0	0	0	0	0	0	0	0	0	0	0	0	0	0	0	0	0	NA	NA	0	0	0	0	0	0	0	0	0	0	NA	FALSE	FALSE
"1"	100535267	100536559	"-"	"ENSRNOG00000019660_004i"	"ENSRNOG00000019660"	"Spib"	1292	0	0	0	0	0	0	0	0	0	0	0	0	0	0	0	0	0	0	0	0	0	0	0	0	0	0	0	0	0	0	0	0	0	0	0	0	0	0	0	0	0	0	0	0	0	0	0	0	0	0	NA	NA	0	0	0	0	0	0	0	0	0	0	NA	FALSE	FALSE
"1"	100536588	100537346	"-"	"ENSRNOG00000019660_005i"	"ENSRNOG00000019660"	"Spib"	758	0	0	0	0	1	0	0	0	0	0	0	0	0	0	0	0	0	0	0	0	0	0	0	0	0	0	0	0	0	0	0	0	0	0	0	0	0	0	0	0	0	0	0	0	0	0	0	0	0	0	NA	NA	0.2	0	0.000263852242744063	0	0	0	0	0	0	0	-Inf	FALSE	FALSE
"1"	100538212	100538524	"-"	"ENSRNOG00000019681_001i"	"ENSRNOG00000019681"	"Pold1"	312	0	0	0	0	0	0	0	0	0	0	0	0	0	0	0	0	0	0	0	0	0	0	2	0	0	0	0	0	0	0	0	0	0	0	0	0	0	0	0	0	0	0	0	0	0	0	0	0	0	0	NA	NA	0	0	0	0	0	0	0	0	0	0	NA	FALSE	FALSE
"1"	100538623	100538694	"-"	"ENSRNOG00000019681_002i"	"ENSRNOG00000019681"	"Pold1"	71	0	0	0	0	0	0	0	0	0	0	0	0	0	0	1	0	0	0	0	0	0	0	1	0	0	0	0	0	0	0	0	0	0	0	0	0	0	0	0	0	0	0	0	0	0	0	0	0	0	0	NA	NA	0	0	0	0	0.2	0	0	0	0	0	NA	FALSE	FALSE
"1"	100538748	100539011	"-"	"ENSRNOG00000019681_003i"	"ENSRNOG00000019681"	"Pold1"	263	0	0	0	0	0	0	0	0	0	0	0	0	0	0	0	0	0	0	0	0	0	0	0	0	0	0	0	0	0	0	0	0	0	0	0	0	0	0	0	0	0	0	0	0	0	0	0	0	0	0	NA	NA	0	0	0	0	0	0	0	0	0	0	NA	FALSE	FALSE
"1"	100539126	100539209	"-"	"ENSRNOG00000019681_004i"	"ENSRNOG00000019681"	"Pold1"	83	0	0	0	0	2	0	0	0	0	0	0	0	0	0	0	0	0	0	0	0	0	0	0	0	0	0	0	0	2	0	0	0	0	0	0	0	0	0	0	0	0	0	0	0	0	0	0	0	0	0	NA	NA	0.4	0	0.00481927710843374	0	0	0	0.4	0	0	0	-Inf	FALSE	FALSE
"1"	100539343	100539738	"-"	"ENSRNOG00000019681_005i"	"ENSRNOG00000019681"	"Pold1"	395	0	0	0	6	6	0	4	0	0	0	0	0	1	1	0	0	0	0	0	0	0	0	4	0	0	0	0	0	1	0	4	0	0	0	0	0	0	0	0	0	0	0	0	0	0	0	0	0	0	0	NA	NA	2.4	0.8	0.00607594936708861	0.0020253164556962	0.4	0	0.2	0.8	0	0	-1.09861228866811	FALSE	FALSE
"1"	100539842	100539917	"-"	"ENSRNOG00000019681_006i"	"ENSRNOG00000019681"	"Pold1"	75	0	0	0	1	0	0	0	0	0	0	0	0	0	0	0	0	0	0	0	0	0	0	3	0	0	0	0	1	0	0	0	0	0	0	0	0	0	0	0	0	0	0	0	0	0	0	0	0	0	0	NA	NA	0.2	0	0.00266666666666667	0	0	0	0.2	0	0	0	-Inf	FALSE	FALSE
"1"	100540071	100540353	"-"	"ENSRNOG00000019681_007i"	"ENSRNOG00000019681"	"Pold1"	282	0	0	0	0	0	0	0	0	0	0	2	0	0	0	1	2	1	0	0	0	0	0	0	0	0	0	0	0	0	0	0	0	0	0	0	0	0	0	0	0	0	0	0	0	0	0	0	0	0	0	NA	NA	0	0	0	0	0.8	0	0	0	0	0	NA	FALSE	FALSE
"1"	100540530	100541049	"-"	"ENSRNOG00000019681_008i"	"ENSRNOG00000019681"	"Pold1"	519	1	0	0	0	0	0	0	0	0	0	0	0	0	0	0	0	0	0	0	0	0	0	2	0	0	0	0	0	0	0	0	0	0	0	0	0	0	0	0	0	0	0	0	0	0	0	0	0	0	0	NA	NA	0.2	0	0.000385356454720617	0	0	0	0	0	0	0	-Inf	FALSE	FALSE
"1"	100541188	100541291	"-"	"ENSRNOG00000019681_009i"	"ENSRNOG00000019681"	"Pold1"	103	0	0	0	0	0	0	0	0	0	0	0	0	0	0	0	0	0	0	0	0	0	0	1	0	0	0	0	0	0	0	0	0	0	0	0	0	0	0	0	0	0	0	0	0	0	0	0	0	0	0	NA	NA	0	0	0	0	0	0	0	0	0	0	NA	FALSE	FALSE
"1"	100541388	100543057	"-"	"ENSRNOG00000019681_010i"	"ENSRNOG00000019681"	"Pold1"	1669	0	1	1	4	2	0	0	0	0	0	0	0	0	0	0	0	0	0	0	1	0	0	0	0	0	0	0	0	0	0	0	0	0	0	0	0	0	0	0	0	0	0	0	0	0	0	0	0	0	0	NA	NA	1.6	0	0.000958657878969443	0	0	0.2	0	0	0	0	-Inf	FALSE	FALSE
"1"	100543206	100543450	"-"	"ENSRNOG00000019681_011i"	"ENSRNOG00000019681"	"Pold1"	244	0	0	0	0	0	0	0	0	0	0	0	0	1	0	0	0	0	0	0	0	0	0	3	0	0	0	0	0	0	0	0	0	0	0	0	0	0	0	0	0	0	0	0	0	0	0	0	0	0	0	NA	NA	0	0	0	0	0.2	0	0	0	0	0	NA	FALSE	FALSE
"1"	100543565	100543850	"-"	"ENSRNOG00000019681_012i"	"ENSRNOG00000019681"	"Pold1"	285	0	0	0	0	0	0	0	0	0	0	0	0	0	2	0	2	2	0	0	0	0	0	6	0	0	0	0	0	0	0	0	0	0	0	0	0	0	0	0	0	0	0	0	0	0	0	0	0	0	0	NA	NA	0	0	0	0	1.2	0	0	0	0	0	NA	FALSE	FALSE
"1"	100543968	100544129	"-"	"ENSRNOG00000019681_013i"	"ENSRNOG00000019681"	"Pold1"	161	0	0	0	0	0	0	0	0	0	0	0	0	0	0	0	0	0	0	1	0	0	0	6	0	0	0	0	0	0	0	0	0	0	0	0	0	0	0	0	0	0	0	0	0	0	0	0	0	0	0	NA	NA	0	0	0	0	0	0.2	0	0	0	0	NA	FALSE	FALSE
"1"	100544219	100544297	"-"	"ENSRNOG00000019681_014i"	"ENSRNOG00000019681"	"Pold1"	78	0	0	0	0	0	0	0	0	0	0	0	0	5	1	0	0	0	0	0	0	0	0	0	0	0	0	0	0	0	0	0	0	0	0	0	0	0	0	0	0	0	0	0	0	0	0	0	0	0	0	NA	NA	0	0	0	0	1.2	0	0	0	0	0	NA	FALSE	FALSE
"1"	100544490	100544730	"-"	"ENSRNOG00000019681_015i"	"ENSRNOG00000019681"	"Pold1"	240	0	0	0	0	0	0	0	0	0	0	0	0	0	0	0	1	1	5	0	0	0	0	1	1	0	0	0	0	0	0	0	0	0	0	0	0	0	0	0	0	0	0	0	0	0	0	0	0	0	0	NA	NA	0	0	0	0	0.4	1	0	0	0	0	NA	FALSE	FALSE
"1"	100544842	100545042	"-"	"ENSRNOG00000019681_016i"	"ENSRNOG00000019681"	"Pold1"	200	0	0	1	0	1	0	0	0	0	0	0	0	2	4	3	0	0	3	0	0	0	0	4	0	0	0	0	0	1	0	0	0	0	0	0	0	0	0	0	0	0	0	0	0	0	0	0	0	0	0	NA	NA	0.4	0	0.002	0	1.8	0.6	0.2	0	0	0	-Inf	FALSE	FALSE
"1"	100545184	100546222	"-"	"ENSRNOG00000019681_017i"	"ENSRNOG00000019681"	"Pold1"	1038	0	1	0	0	2	0	0	0	0	0	0	0	0	0	0	0	0	0	0	0	0	0	1	0	0	0	0	0	0	0	0	0	0	0	0	0	0	0	0	0	0	0	0	0	0	0	0	0	0	0	NA	NA	0.6	0	0.000578034682080925	0	0	0	0	0	0	0	-Inf	FALSE	FALSE
"1"	100546328	100546541	"-"	"ENSRNOG00000019681_018i"	"ENSRNOG00000019681"	"Pold1"	213	0	0	0	0	0	0	0	0	0	0	0	0	6	6	4	9	10	0	5	0	1	9	4	0	0	0	0	0	0	0	0	0	0	0	0	0	0	0	0	0	0	0	0	0	0	0	0	0	0	0	NA	NA	0	0	0	0	7	3	0	0	0	0	NA	FALSE	FALSE
"1"	100546709	100546955	"-"	"ENSRNOG00000019681_019i"	"ENSRNOG00000019681"	"Pold1"	246	0	0	0	0	0	0	0	0	0	0	0	0	0	0	0	0	0	0	0	0	0	0	1	0	0	0	0	0	0	0	0	0	0	0	0	0	0	0	0	0	0	0	0	0	0	0	0	0	0	0	NA	NA	0	0	0	0	0	0	0	0	0	0	NA	FALSE	FALSE
"1"	100547086	100547155	"-"	"ENSRNOG00000019681_020i"	"ENSRNOG00000019681"	"Pold1"	69	0	0	0	0	0	0	0	0	0	0	0	0	0	0	0	0	0	0	0	0	0	0	1	0	0	0	0	0	0	0	0	0	0	0	0	0	0	0	0	0	0	0	0	0	0	0	0	0	0	0	NA	NA	0	0	0	0	0	0	0	0	0	0	NA	FALSE	FALSE
"1"	100547238	100547320	"-"	"ENSRNOG00000019681_021i"	"ENSRNOG00000019681"	"Pold1"	82	0	0	0	3	4	0	0	0	0	0	0	0	0	3	0	1	1	0	0	0	0	0	0	0	0	0	0	3	4	0	0	0	0	0	0	0	0	0	0	0	0	0	0	0	0	0	0	0	0	0	NA	NA	1.4	0	0.0170731707317073	0	1	0	1.4	0	0	0	-Inf	FALSE	FALSE
"1"	100547490	100547563	"-"	"ENSRNOG00000019681_022i"	"ENSRNOG00000019681"	"Pold1"	73	0	0	0	0	0	0	0	0	0	0	0	0	0	2	0	0	0	0	7	0	0	0	2	0	0	0	0	0	0	0	0	0	0	0	0	0	0	0	0	0	0	0	0	0	0	0	0	0	0	0	NA	NA	0	0	0	0	0.4	1.4	0	0	0	0	NA	FALSE	FALSE
"1"	100547690	100547767	"-"	"ENSRNOG00000019681_023i"	"ENSRNOG00000019681"	"Pold1"	77	0	0	0	0	0	0	0	0	0	0	0	0	0	0	0	0	0	0	0	0	0	0	0	0	0	0	0	0	0	0	0	0	0	0	0	0	0	0	0	0	0	0	0	0	0	0	0	0	0	0	NA	NA	0	0	0	0	0	0	0	0	0	0	NA	FALSE	FALSE
"1"	100547915	100548399	"-"	"ENSRNOG00000019681_024i"	"ENSRNOG00000019681"	"Pold1"	484	0	1	0	0	0	0	0	0	0	0	0	0	4	3	0	2	0	3	0	0	0	0	0	0	0	1	0	0	0	0	0	0	0	0	0	0	0	0	0	0	0	0	0	0	0	0	0	0	0	0	NA	NA	0.2	0	0.000413223140495868	0	1.8	0.6	0.2	0	0	0	-Inf	FALSE	FALSE
"1"	100548514	100548873	"-"	"ENSRNOG00000019681_025i"	"ENSRNOG00000019681"	"Pold1"	359	0	3	0	0	0	0	0	0	0	0	0	0	0	4	2	0	0	0	0	0	0	0	0	0	0	0	0	0	0	0	0	0	0	0	0	0	0	3	0	0	0	0	0	0	0	0	0	0	0	0	NA	NA	0.6	0	0.00167130919220056	0	1.2	0	0	0	0.6	0	-Inf	FALSE	FALSE
"1"	100549064	100553861	"-"	"ENSRNOG00000019681_026i"	"ENSRNOG00000019681"	"Pold1"	4797	2	13	0	2	2	0	0	0	0	0	9	0	0	0	0	0	0	0	0	0	0	0	0	0	0	0	0	2	0	0	0	0	0	0	0	0	0	0	0	0	0	0	0	0	0	0	0	0	0	0	NA	NA	3.8	0	0.000792161767771524	0	0	0	0.4	0	0	0	-Inf	FALSE	FALSE
"1"	100555080	100555309	"-"	"ENSRNOG00000019812_001i"	"ENSRNOG00000019812"	"Nr1h2"	229	1	0	0	0	0	0	0	0	0	0	0	0	4	7	11	5	3	0	0	1	0	0	87	2	0	0	0	0	0	0	0	0	0	0	0	0	1	0	0	0	0	0	0	0	0	0	0	0	0	0	NA	NA	0.2	0	0.000873362445414847	0	6	0.2	0	0	0.2	0	-Inf	FALSE	FALSE
"1"	100555519	100556743	"-"	"ENSRNOG00000019812_002i"	"ENSRNOG00000019812"	"Nr1h2"	1224	4	4	2	11	7	0	0	0	0	0	0	0	2	3	2	1	0	12	7	5	0	0	55	0	2	0	0	0	1	0	0	0	0	0	0	0	0	1	0	0	1	0	0	0	0	0	0	0	0	0	NA	NA	5.6	0	0.00457516339869281	0	1.6	4.8	0.6	0	0.4	0	-Inf	FALSE	FALSE
"1"	100556844	100557287	"-"	"ENSRNOG00000019812_003i"	"ENSRNOG00000019812"	"Nr1h2"	443	1	0	0	4	1	0	0	0	0	4	0	0	26	21	10	15	10	22	10	31	6	9	70	1	0	0	0	0	0	0	0	0	0	0	0	0	0	0	0	0	0	0	0	0	0	0	0	0	0	0	NA	NA	1.2	0.8	0.00270880361173815	0.0018058690744921	16.4	15.6	0	0	0	0	-0.405465108108164	FALSE	FALSE
"1"	100557468	100557567	"-"	"ENSRNOG00000019812_004i"	"ENSRNOG00000019812"	"Nr1h2"	99	3	0	0	0	0	0	0	0	0	0	0	0	6	18	7	5	7	3	9	4	3	10	67	0	0	0	0	0	0	0	0	0	0	0	0	0	3	0	0	0	0	0	0	0	0	0	0	0	0	0	NA	NA	0.6	0	0.00606060606060606	0	8.6	5.8	0	0	0.6	0	-Inf	FALSE	FALSE
"1"	100557828	100557923	"-"	"ENSRNOG00000019812_005i"	"ENSRNOG00000019812"	"Nr1h2"	95	0	0	0	0	0	0	0	0	0	0	1	0	13	19	10	4	2	10	19	6	12	0	47	0	0	0	0	0	0	0	0	0	0	0	0	0	0	0	0	0	0	0	0	0	0	0	0	0	0	0	NA	NA	0	0	0	0	9.6	9.4	0	0	0	0	NA	FALSE	FALSE
"1"	100558215	100558475	"-"	"ENSRNOG00000019812_006i"	"ENSRNOG00000019812"	"Nr1h2"	260	5	18	19	21	20	28	9	17	5	1	75	9	9	10	9	0	0	2	3	0	0	4	22	0	0	0	0	12	5	0	0	0	0	0	0	0	0	3	6	2	0	9	3	0	0	0	19	1	0	0	NA	NA	16.6	12	0.0638461538461539	0.0461538461538462	5.6	1.8	3.4	0	2.2	2.4	-0.324496045574497	TRUE	TRUE
"1"	100558590	100558665	"-"	"ENSRNOG00000019812_007i"	"ENSRNOG00000019812"	"Nr1h2"	75	0	1	2	9	4	0	0	0	0	1	0	0	11	17	18	15	2	5	19	7	25	13	42	1	0	1	2	9	1	0	0	0	0	0	0	0	0	1	2	3	3	0	0	0	0	0	0	0	0	0	NA	NA	3.2	0.2	0.0426666666666667	0.00266666666666667	12.6	13.8	2.6	0	1.8	0	-2.77258872223978	FALSE	FALSE
"1"	100558724	100559575	"-"	"ENSRNOG00000019812_008i"	"ENSRNOG00000019812"	"Nr1h2"	851	4	7	1	4	0	2	1	6	0	0	10	0	53	83	42	74	62	53	48	51	77	80	37	2	0	0	0	0	0	0	0	0	0	0	0	0	0	0	0	3	0	0	0	0	0	0	9	0	0	0	NA	NA	3.2	1.8	0.00376028202115159	0.00211515863689777	62.8	61.8	0	0	0.6	0	-0.575364144903562	FALSE	FALSE
"1"	100559708	100559806	"-"	"ENSRNOG00000019812_009i"	"ENSRNOG00000019812"	"Nr1h2"	98	0	0	0	0	0	0	0	0	0	0	0	0	25	15	25	18	17	21	24	4	18	34	16	1	0	0	0	0	0	0	0	0	0	0	0	0	0	0	0	0	0	0	0	0	0	0	0	0	0	0	NA	NA	0	0	0	0	20	20.2	0	0	0	0	NA	FALSE	FALSE
"1"	100577613	100584368	"+"	"ENSRNOG00000019854_001i"	"ENSRNOG00000019854"	"Napsa"	6755	0	1	0	0	0	0	0	0	0	4	2	0	0	0	0	0	0	0	0	0	0	0	0	0	0	0	0	0	0	0	0	0	0	0	0	0	0	0	0	0	0	0	0	0	0	0	0	0	0	0	NA	NA	0.2	0.8	2.96076980014804e-05	0.000118430792005922	0	0	0	0	0	0	1.38629436111989	FALSE	FALSE
"1"	100584505	100584591	"+"	"ENSRNOG00000019854_002i"	"ENSRNOG00000019854"	"Napsa"	86	0	0	0	0	0	0	0	0	0	0	0	0	0	0	0	0	0	0	0	0	0	0	0	0	0	0	0	0	0	0	0	0	0	0	0	0	0	0	0	0	0	0	0	0	0	0	0	0	0	0	NA	NA	0	0	0	0	0	0	0	0	0	0	NA	FALSE	FALSE
"1"	100584716	100584848	"+"	"ENSRNOG00000019854_003i"	"ENSRNOG00000019854"	"Napsa"	132	0	0	0	0	0	0	0	0	0	0	0	0	0	0	0	0	0	0	0	0	0	0	0	0	0	0	0	0	0	0	0	0	0	0	0	0	0	0	0	0	0	0	0	0	0	0	0	0	0	0	NA	NA	0	0	0	0	0	0	0	0	0	0	NA	FALSE	FALSE
"1"	100584968	100585507	"+"	"ENSRNOG00000019854_004i"	"ENSRNOG00000019854"	"Napsa"	539	0	0	0	0	0	0	0	0	0	0	0	0	0	0	0	0	0	0	0	0	0	0	0	0	0	0	0	0	0	0	0	0	0	0	0	0	0	0	0	0	0	0	0	0	0	0	0	0	0	0	NA	NA	0	0	0	0	0	0	0	0	0	0	NA	FALSE	FALSE
"1"	100585708	100587712	"+"	"ENSRNOG00000019854_005i"	"ENSRNOG00000019854"	"Napsa"	2004	0	0	0	0	0	0	0	0	0	5	0	0	0	0	0	0	0	0	0	0	0	0	0	0	0	0	0	0	0	0	0	0	0	0	0	0	0	0	0	0	0	0	0	0	0	0	0	0	0	0	NA	NA	0	1	0	0.000499001996007984	0	0	0	0	0	0	Inf	FALSE	FALSE
"1"	100587836	100587924	"+"	"ENSRNOG00000019854_006i"	"ENSRNOG00000019854"	"Napsa"	88	0	0	0	0	0	0	0	0	0	0	0	0	0	0	0	0	0	0	0	0	0	0	0	0	0	0	0	0	0	0	0	0	0	0	0	0	0	0	0	0	0	0	0	0	0	0	0	0	0	0	NA	NA	0	0	0	0	0	0	0	0	0	0	NA	FALSE	FALSE
"1"	100588070	100588437	"+"	"ENSRNOG00000019854_007i"	"ENSRNOG00000019854"	"Napsa"	367	0	0	0	0	0	0	0	0	0	0	0	0	0	0	0	0	0	0	0	0	0	0	0	0	0	0	0	0	0	0	0	0	0	0	0	0	0	0	0	0	0	0	0	0	0	0	0	0	0	0	NA	NA	0	0	0	0	0	0	0	0	0	0	NA	FALSE	FALSE
"1"	100588537	100589498	"+"	"ENSRNOG00000019854_008i"	"ENSRNOG00000019854"	"Napsa"	961	0	0	0	4	1	0	0	0	0	3	0	0	0	0	0	0	0	0	0	0	0	0	0	0	0	0	0	0	0	0	0	0	0	0	0	0	0	0	0	0	0	0	0	0	0	0	0	0	0	0	NA	NA	1	0.6	0.00104058272632674	0.000624349635796046	0	0	0	0	0	0	-0.510825623765991	FALSE	FALSE
"1"	100594765	100598147	"+"	"ENSRNOG00000019959_002i"	"ENSRNOG00000019959"	"Kcnc3"	3382	11	8	15	80	119	0	0	0	10	4	8	3	5	6	7	5	12	32	18	6	0	0	53	5	0	0	1	1	0	0	0	0	0	0	0	0	0	0	0	0	2	0	0	0	0	0	0	0	0	0	NA	NA	46.6	2.8	0.0137788290952099	0.000827912477823773	7	11.2	0.4	0	0.4	0	-2.81198112395044	TRUE	FALSE
"1"	100599256	100600603	"+"	"ENSRNOG00000019959_003i"	"ENSRNOG00000019959"	"Kcnc3"	1347	0	10	8	12	12	0	0	0	0	0	103	0	14	12	13	26	18	14	30	4	28	10	38	2	0	0	0	0	0	0	0	0	0	0	0	0	0	0	0	0	4	0	0	0	0	0	4	0	0	0	NA	NA	8.4	0	0.00623608017817372	0	16.6	17.2	0	0	0.8	0	-Inf	FALSE	FALSE
"1"	100600634	100601332	"+"	"ENSRNOG00000019959_004i"	"ENSRNOG00000019959"	"Kcnc3"	698	15	22	18	96	95	0	0	0	1	2	153	2	18	7	11	31	11	13	24	5	19	9	89	3	0	0	0	4	5	0	0	0	0	0	0	0	14	1	7	3	2	0	0	0	0	0	15	1	0	0	14	NA	49.2	0.6	0.070487106017192	0.000859598853868195	15.6	14	1.8	0	5.4	0	-4.40671924726425	TRUE	FALSE
"1"	100601528	100601757	"+"	"ENSRNOG00000019959_006i"	"ENSRNOG00000019959"	"Kcnc3"	229	2	8	4	61	72	0	0	0	0	5	58	0	6	9	10	57	65	0	16	0	64	61	15	0	0	0	2	10	8	0	0	0	0	0	34	0	2	5	1	5	8	0	0	0	0	0	0	0	0	0	NA	NA	29.4	1	0.128384279475983	0.00436681222707424	29.4	28.2	4	0	4.2	0	-3.38099467434464	TRUE	FALSE
"1"	100601887	100603732	"+"	"ENSRNOG00000019959_008i"	"ENSRNOG00000019959"	"Kcnc3"	1845	5	12	8	128	152	0	0	0	10	5	491	1	6	10	10	58	58	5	19	0	64	43	18	0	0	4	0	16	37	0	0	0	4	2	7	0	0	3	0	5	6	0	0	0	1	0	6	0	0	0	NA	NA	61	3	0.0330623306233062	0.0016260162601626	28.4	26.2	11.4	1.2	2.8	0.2	-3.0122615755052	TRUE	FALSE
"1"	100604069	100605002	"+"	"ENSRNOG00000019959_011i"	"ENSRNOG00000019959"	"Kcnc3"	933	4	10	6	99	102	5	11	0	30	21	635	0	0	4	2	60	53	3	17	0	60	32	3	0	0	2	0	0	11	0	0	0	1	2	17	0	1	1	0	7	9	0	0	0	3	2	8	0	0	0	NA	NA	44.2	13.4	0.047374062165059	0.0143622722400857	23.8	22.4	2.6	0.6	3.6	1	-1.19347008212679	TRUE	FALSE
"1"	100609528	100609811	"-"	"ENSRNOG00000020014_002i"	"ENSRNOG00000020014"	"Myh14"	283	0	0	0	0	2	0	0	0	0	0	0	0	3	0	2	0	0	0	1	0	3	0	3	0	0	0	0	0	0	0	0	0	0	0	0	0	0	0	0	0	0	0	0	0	0	0	0	0	0	0	NA	NA	0.4	0	0.00141342756183746	0	1	0.8	0	0	0	0	-Inf	FALSE	FALSE
"1"	100609985	100611584	"-"	"ENSRNOG00000020014_003i"	"ENSRNOG00000020014"	"Myh14"	1599	0	0	0	3	2	0	0	0	0	0	0	0	10	7	2	0	0	2	0	5	0	5	2	1	0	0	0	0	0	0	0	0	0	0	0	0	0	0	0	0	0	0	0	0	0	0	0	0	0	0	NA	NA	1	0	0.000625390869293308	0	3.8	2.4	0	0	0	0	-Inf	FALSE	FALSE
"1"	100611694	100614651	"-"	"ENSRNOG00000020014_004i"	"ENSRNOG00000020014"	"Myh14"	2957	0	1	4	1	4	0	0	0	2	5	0	0	1	0	1	0	0	9	14	5	0	0	1	0	0	0	0	0	0	0	0	0	0	0	0	0	0	0	0	0	0	0	0	0	0	0	0	0	0	0	NA	NA	2	1.4	0.000676361176868448	0.000473452823807913	0.4	5.6	0	0	0	0	-0.356674943938732	FALSE	FALSE
"1"	100614861	100616513	"-"	"ENSRNOG00000020014_005i"	"ENSRNOG00000020014"	"Myh14"	1652	0	0	4	2	2	0	0	0	0	0	8	3	2	2	0	0	0	0	2	4	0	0	0	0	0	0	0	0	0	0	0	0	0	0	0	0	0	0	0	0	0	0	0	0	0	0	1	1	0	0	NA	NA	1.6	0	0.000968523002421308	0	0.8	1.2	0	0	0	0	-Inf	FALSE	FALSE
"1"	100616638	100616727	"-"	"ENSRNOG00000020014_006i"	"ENSRNOG00000020014"	"Myh14"	89	0	0	0	0	0	0	0	0	0	0	0	0	2	3	1	0	3	6	0	0	0	0	0	0	0	0	0	0	0	0	0	0	0	0	0	0	0	0	0	0	0	0	0	0	0	0	0	0	0	0	NA	NA	0	0	0	0	1.8	1.2	0	0	0	0	NA	FALSE	FALSE
"1"	100616817	100617335	"-"	"ENSRNOG00000020014_007i"	"ENSRNOG00000020014"	"Myh14"	518	0	0	0	0	0	0	0	0	0	0	0	0	0	2	0	2	3	14	9	1	0	0	2	0	0	0	0	0	0	0	0	0	0	0	0	0	0	0	0	0	0	0	0	0	0	0	0	0	0	0	NA	NA	0	0	0	0	1.4	4.8	0	0	0	0	NA	FALSE	FALSE
"1"	100617465	100618290	"-"	"ENSRNOG00000020014_008i"	"ENSRNOG00000020014"	"Myh14"	825	0	0	0	0	1	0	0	0	0	0	0	0	0	3	0	0	4	13	9	0	0	0	0	0	0	0	0	0	0	0	0	0	0	0	0	0	0	0	0	0	0	0	0	0	0	0	0	0	0	0	NA	NA	0.2	0	0.000242424242424242	0	1.4	4.4	0	0	0	0	-Inf	FALSE	FALSE
"1"	100618453	100619087	"-"	"ENSRNOG00000020014_009i"	"ENSRNOG00000020014"	"Myh14"	634	0	0	0	0	0	0	0	0	0	0	0	0	0	8	7	0	0	6	1	6	0	0	2	0	0	0	0	0	0	0	0	0	0	0	0	0	0	0	0	0	0	0	0	0	0	0	0	0	0	0	NA	NA	0	0	0	0	3	2.6	0	0	0	0	NA	FALSE	FALSE
"1"	100619301	100622882	"-"	"ENSRNOG00000020014_010i"	"ENSRNOG00000020014"	"Myh14"	3581	4	3	0	7	3	0	0	0	0	0	0	0	0	0	4	0	2	0	5	0	0	0	5	0	2	0	0	0	0	0	0	0	0	0	0	0	0	0	0	0	0	0	0	0	0	0	0	0	0	0	NA	NA	3.4	0	0.000949455459368891	0	1.2	1	0.4	0	0	0	-Inf	FALSE	FALSE
"1"	100623096	100624085	"-"	"ENSRNOG00000020014_011i"	"ENSRNOG00000020014"	"Myh14"	989	1	0	0	3	2	0	0	0	0	0	0	0	2	4	2	2	1	4	9	0	0	8	2	0	0	0	0	0	0	0	0	0	0	0	0	0	0	0	0	0	0	0	0	0	0	0	0	0	0	0	NA	NA	1.2	0	0.00121334681496461	0	2.2	4.2	0	0	0	0	-Inf	FALSE	FALSE
"1"	100624335	100625190	"-"	"ENSRNOG00000020014_012i"	"ENSRNOG00000020014"	"Myh14"	855	0	0	1	0	1	0	0	0	0	0	0	0	0	4	2	0	0	0	0	0	0	0	1	0	0	0	0	0	0	0	0	0	0	0	0	0	0	0	0	0	0	0	0	0	0	0	0	0	0	0	NA	NA	0.4	0	0.000467836257309942	0	1.2	0	0	0	0	0	-Inf	FALSE	FALSE
"1"	100625344	100625424	"-"	"ENSRNOG00000020014_013i"	"ENSRNOG00000020014"	"Myh14"	80	0	0	0	0	0	0	0	0	0	0	0	0	0	1	1	0	1	0	2	3	0	0	4	0	0	0	0	0	0	0	0	0	0	0	0	0	0	0	0	0	0	0	0	0	0	0	0	0	0	0	NA	NA	0	0	0	0	0.6	1	0	0	0	0	NA	FALSE	FALSE
"1"	100625530	100626084	"-"	"ENSRNOG00000020014_014i"	"ENSRNOG00000020014"	"Myh14"	554	0	0	0	0	0	0	0	0	0	0	0	0	4	1	0	0	0	1	0	0	3	0	0	0	0	0	0	0	0	0	0	0	0	0	0	0	0	0	0	0	0	0	0	0	0	0	0	0	0	0	NA	NA	0	0	0	0	1	0.8	0	0	0	0	NA	FALSE	FALSE
"1"	100626292	100626455	"-"	"ENSRNOG00000020014_015i"	"ENSRNOG00000020014"	"Myh14"	163	0	0	0	0	0	0	0	0	0	0	0	0	2	4	2	2	0	1	7	0	0	0	1	0	0	0	0	0	0	0	0	0	0	0	0	0	0	0	0	0	0	0	0	0	0	0	0	0	0	0	NA	NA	0	0	0	0	2	1.6	0	0	0	0	NA	FALSE	FALSE
"1"	100626601	100628116	"-"	"ENSRNOG00000020014_016i"	"ENSRNOG00000020014"	"Myh14"	1515	0	0	0	0	0	0	0	0	0	2	0	0	2	1	2	3	0	2	7	0	0	0	1	0	0	0	0	0	0	0	0	0	0	0	0	0	0	0	0	0	0	0	0	0	0	0	0	0	0	0	NA	NA	0	0.4	0	0.000264026402640264	1.6	1.8	0	0	0	0	Inf	FALSE	FALSE
"1"	100628330	100629247	"-"	"ENSRNOG00000020014_017i"	"ENSRNOG00000020014"	"Myh14"	917	2	1	0	0	0	0	0	0	0	0	0	0	0	1	0	0	0	0	0	2	1	0	3	0	0	0	0	0	0	0	0	0	0	0	0	0	0	0	0	0	0	0	0	0	0	0	0	0	0	0	NA	NA	0.6	0	0.000654307524536532	0	0.2	0.6	0	0	0	0	-Inf	FALSE	FALSE
"1"	100629420	100629570	"-"	"ENSRNOG00000020014_018i"	"ENSRNOG00000020014"	"Myh14"	150	0	0	0	0	0	0	0	0	0	0	0	0	3	8	11	0	0	0	2	5	13	0	4	0	0	0	0	0	0	0	0	0	0	0	0	0	0	0	0	0	0	0	0	0	0	0	0	0	0	0	NA	NA	0	0	0	0	4.4	4	0	0	0	0	NA	FALSE	FALSE
"1"	100629695	100630007	"-"	"ENSRNOG00000020014_019i"	"ENSRNOG00000020014"	"Myh14"	312	0	0	0	0	0	0	0	0	0	0	0	0	0	3	2	0	0	0	13	1	0	0	6	0	0	0	0	0	0	0	0	0	0	0	0	0	0	0	0	0	0	0	0	0	0	0	0	0	0	0	NA	NA	0	0	0	0	1	2.8	0	0	0	0	NA	FALSE	FALSE
"1"	100630146	100630595	"-"	"ENSRNOG00000020014_020i"	"ENSRNOG00000020014"	"Myh14"	449	1	1	0	0	0	0	0	0	0	0	1	0	0	0	9	0	0	0	1	0	0	0	2	0	0	0	0	0	0	0	0	0	0	0	0	0	0	0	0	0	0	0	0	0	0	0	0	0	0	0	NA	NA	0.4	0	0.00089086859688196	0	1.8	0.2	0	0	0	0	-Inf	FALSE	FALSE
"1"	100630803	100631353	"-"	"ENSRNOG00000020014_021i"	"ENSRNOG00000020014"	"Myh14"	550	0	0	0	0	0	0	0	0	0	0	0	0	1	0	2	0	2	1	0	0	0	0	4	0	0	0	0	0	0	0	0	0	0	0	0	0	0	0	0	0	0	0	0	0	0	0	0	0	0	0	NA	NA	0	0	0	0	1	0.2	0	0	0	0	NA	FALSE	FALSE
"1"	100631486	100632214	"-"	"ENSRNOG00000020014_022i"	"ENSRNOG00000020014"	"Myh14"	728	0	0	0	0	0	0	0	0	0	0	0	0	2	0	3	1	0	0	6	0	8	0	2	0	0	0	0	0	0	0	0	0	0	0	0	0	0	0	0	0	0	0	0	0	0	0	0	0	0	0	NA	NA	0	0	0	0	1.2	2.8	0	0	0	0	NA	FALSE	FALSE
"1"	100632324	100632985	"-"	"ENSRNOG00000020014_023i"	"ENSRNOG00000020014"	"Myh14"	661	4	0	1	0	2	0	0	0	0	2	0	0	1	2	0	4	0	0	0	1	0	0	4	0	0	0	1	0	0	0	0	0	0	0	0	0	0	0	0	0	0	0	0	0	0	0	0	0	0	0	NA	NA	1.4	0.4	0.00211800302571861	0.000605143721633888	1.4	0.2	0.2	0	0	0	-1.25276296849537	FALSE	FALSE
"1"	100633147	100633541	"-"	"ENSRNOG00000020014_024i"	"ENSRNOG00000020014"	"Myh14"	394	0	0	0	0	0	0	0	0	0	0	0	0	0	11	2	3	2	3	5	2	0	0	2	0	0	0	0	0	0	0	0	0	0	0	0	0	0	0	0	0	0	0	0	0	0	0	0	0	0	0	NA	NA	0	0	0	0	3.6	2	0	0	0	0	NA	FALSE	FALSE
"1"	100633612	100634061	"-"	"ENSRNOG00000020014_025i"	"ENSRNOG00000020014"	"Myh14"	449	0	2	0	0	0	0	0	0	0	0	0	0	7	6	2	3	1	8	10	2	6	4	7	0	0	0	0	0	0	0	0	0	0	0	0	0	0	0	0	0	0	0	0	0	0	0	0	0	0	0	NA	NA	0.4	0	0.00089086859688196	0	3.8	6	0	0	0	0	-Inf	FALSE	FALSE
"1"	100634184	100634931	"-"	"ENSRNOG00000020014_026i"	"ENSRNOG00000020014"	"Myh14"	747	0	0	0	0	0	0	0	0	0	0	0	0	6	6	0	4	0	5	0	0	0	0	3	0	0	0	0	0	0	0	0	0	0	0	0	0	0	0	0	0	0	0	0	0	0	0	0	0	0	0	NA	NA	0	0	0	0	3.2	1	0	0	0	0	NA	FALSE	FALSE
"1"	100635120	100638396	"-"	"ENSRNOG00000020014_027i"	"ENSRNOG00000020014"	"Myh14"	3276	3	0	2	0	1	0	0	0	0	0	2	0	0	3	5	1	0	0	0	2	1	2	1	0	0	0	0	0	0	0	0	0	0	0	0	0	0	0	1	0	0	0	0	0	0	0	0	0	0	0	NA	NA	1.2	0	0.000366300366300366	0	1.8	1	0	0	0.2	0	-Inf	FALSE	FALSE
"1"	100638512	100638930	"-"	"ENSRNOG00000020014_028i"	"ENSRNOG00000020014"	"Myh14"	418	0	0	0	0	0	0	0	0	0	0	0	0	2	7	3	4	2	16	4	0	0	0	0	0	0	0	0	0	0	0	0	0	0	0	0	0	0	0	0	0	0	0	0	0	0	0	0	0	0	0	NA	NA	0	0	0	0	3.6	4	0	0	0	0	NA	FALSE	FALSE
"1"	100639105	100639595	"-"	"ENSRNOG00000020014_029i"	"ENSRNOG00000020014"	"Myh14"	490	0	0	0	1	0	0	0	0	0	0	0	0	2	1	1	2	3	10	6	0	2	0	6	1	0	0	0	1	0	0	0	0	0	0	0	0	0	0	0	0	0	0	0	0	0	0	0	0	0	0	NA	NA	0.2	0	0.000408163265306122	0	1.8	3.6	0.2	0	0	0	-Inf	FALSE	FALSE
"1"	100639770	100639861	"-"	"ENSRNOG00000020014_030i"	"ENSRNOG00000020014"	"Myh14"	91	0	0	0	0	0	0	0	0	0	0	0	0	1	12	3	1	1	6	6	0	4	0	3	0	0	0	0	0	0	0	0	0	0	0	0	0	0	0	0	0	0	0	0	0	0	0	0	0	0	0	NA	NA	0	0	0	0	3.6	3.2	0	0	0	0	NA	FALSE	FALSE
"1"	100640015	100641711	"-"	"ENSRNOG00000020014_031i"	"ENSRNOG00000020014"	"Myh14"	1696	3	4	0	0	0	0	0	0	0	0	0	0	0	1	0	3	4	3	2	5	4	0	6	0	0	0	0	0	0	0	0	0	0	0	0	0	0	0	0	0	0	0	0	0	0	0	0	0	0	0	NA	NA	1.4	0	0.000825471698113207	0	1.6	2.8	0	0	0	0	-Inf	FALSE	FALSE
"1"	100641831	100644559	"-"	"ENSRNOG00000020014_032i"	"ENSRNOG00000020014"	"Myh14"	2728	0	0	0	7	1	0	0	0	2	3	2	0	3	19	12	7	6	12	23	1	4	17	4	0	0	0	0	0	0	0	0	0	0	0	0	0	0	0	0	0	0	0	0	0	0	0	0	0	0	0	NA	NA	1.6	1	0.000586510263929619	0.000366568914956012	9.4	11.4	0	0	0	0	-0.470003629245736	FALSE	FALSE
"1"	100644656	100651855	"-"	"ENSRNOG00000020014_033i"	"ENSRNOG00000020014"	"Myh14"	7199	0	0	3	1	4	0	0	0	0	9	1	0	5	10	1	2	9	5	11	1	3	0	0	0	0	0	0	0	0	0	0	0	0	0	0	0	0	0	0	0	0	0	0	0	0	0	0	0	0	0	NA	NA	1.6	1.8	0.000222253090707043	0.000250034727045423	5.4	4	0	0	0	0	0.117783035656383	FALSE	FALSE
"1"	100651997	100653005	"-"	"ENSRNOG00000020014_034i"	"ENSRNOG00000020014"	"Myh14"	1008	0	0	0	0	0	0	0	0	0	0	0	0	2	2	7	4	0	7	6	0	3	6	1	0	0	0	0	0	0	0	0	0	0	0	0	0	0	0	0	0	0	0	0	0	0	0	0	0	0	0	NA	NA	0	0	0	0	3	4.4	0	0	0	0	NA	FALSE	FALSE
"1"	100653105	100654305	"-"	"ENSRNOG00000020014_035i"	"ENSRNOG00000020014"	"Myh14"	1200	2	0	3	0	1	0	0	1	0	0	0	0	0	4	1	1	0	0	3	4	0	0	10	0	0	0	0	0	0	0	0	0	0	0	0	0	0	0	0	0	0	0	0	0	0	0	0	0	0	0	NA	NA	1.2	0.2	0.001	0.000166666666666667	1.2	1.4	0	0	0	0	-1.79175946922805	FALSE	FALSE
"1"	100654370	100654688	"-"	"ENSRNOG00000020014_036i"	"ENSRNOG00000020014"	"Myh14"	318	0	0	0	0	0	0	0	0	0	0	0	0	0	4	4	0	0	11	4	0	5	3	0	0	0	0	0	0	0	0	0	0	0	0	0	0	0	0	0	0	0	0	0	0	0	0	0	0	0	0	NA	NA	0	0	0	0	1.6	4.6	0	0	0	0	NA	FALSE	FALSE
"1"	100654782	100656696	"-"	"ENSRNOG00000020014_037i"	"ENSRNOG00000020014"	"Myh14"	1914	1	3	8	16	11	0	0	0	0	0	0	0	11	11	12	0	0	4	13	3	0	0	0	0	0	0	0	0	0	0	0	0	0	0	0	0	0	1	0	0	0	0	0	0	0	0	0	0	0	0	NA	NA	7.8	0	0.00407523510971787	0	6.8	4	0	0	0.2	0	-Inf	FALSE	FALSE
"1"	100656721	100657236	"-"	"ENSRNOG00000020014_038i"	"ENSRNOG00000020014"	"Myh14"	515	0	0	0	0	1	0	0	0	0	0	0	0	10	7	13	0	0	3	14	6	0	0	1	0	0	0	0	0	0	0	0	0	0	0	0	0	0	0	0	0	1	0	0	0	0	0	0	0	0	0	NA	NA	0.2	0	0.000388349514563107	0	6	4.6	0	0	0.2	0	-Inf	FALSE	FALSE
"1"	100657340	100657532	"-"	"ENSRNOG00000020014_039i"	"ENSRNOG00000020014"	"Myh14"	192	2	0	0	0	2	0	0	0	0	0	0	0	4	9	0	1	0	5	6	0	0	0	0	0	0	0	0	0	0	0	0	0	0	0	0	0	2	0	0	0	2	0	0	0	0	0	0	0	0	0	NA	NA	0.8	0	0.00416666666666667	0	2.8	2.2	0	0	0.8	0	-Inf	FALSE	FALSE
"1"	100657561	100660094	"-"	"ENSRNOG00000020014_040i"	"ENSRNOG00000020014"	"Myh14"	2533	0	3	2	0	2	0	0	0	0	3	0	0	7	9	0	1	1	6	6	0	2	0	0	0	0	0	0	0	0	0	0	0	0	0	0	0	0	0	0	0	0	0	0	0	0	0	0	0	0	0	NA	NA	1.4	0.6	0.000552704303197789	0.000236873272799052	3.6	2.8	0	0	0	0	-0.847297860387204	FALSE	FALSE
"1"	100660252	100665429	"-"	"ENSRNOG00000020014_041i"	"ENSRNOG00000020014"	"Myh14"	5177	4	18	4	7	6	0	0	1	1	7	1	0	3	8	8	0	4	21	25	8	9	0	0	0	0	0	0	0	0	0	0	0	0	7	0	0	0	0	0	0	0	0	0	0	0	0	0	0	0	0	NA	NA	7.8	1.8	0.00150666409117249	0.000347691713347499	4.6	12.6	0	1.4	0	0	-1.46633706879343	FALSE	FALSE
"1"	100665826	100669495	"-"	"ENSRNOG00000020014_042i"	"ENSRNOG00000020014"	"Myh14"	3669	4	0	0	1	1	0	0	0	0	1	0	0	4	0	0	4	1	7	4	2	0	8	0	0	0	0	0	0	0	0	0	0	0	0	0	0	0	0	0	0	0	0	0	0	0	0	0	0	0	0	NA	NA	1.2	0.2	0.000327064595257563	5.45107658762606e-05	1.8	4.2	0	0	0	0	-1.79175946922805	FALSE	FALSE
"1"	100669685	100671036	"-"	"ENSRNOG00000020014_043i"	"ENSRNOG00000020014"	"Myh14"	1351	3	0	0	0	1	2	4	0	0	2	6	4	3	0	0	0	0	0	2	0	0	0	0	0	0	0	0	0	0	0	0	0	0	0	0	0	0	0	0	0	0	0	4	0	0	0	0	0	0	0	NA	NA	0.8	1.6	0.000592153960029608	0.00118430792005922	0.6	0.4	0	0	0	0.8	0.693147180559945	FALSE	FALSE
"1"	100708925	100709005	"+"	"ENSRNOG00000047254_001i"	"ENSRNOG00000047254"	"Izumo2"	80	0	0	0	0	0	0	0	0	0	0	0	0	0	0	0	0	0	0	0	0	0	0	0	0	0	0	0	0	0	0	0	0	0	0	0	0	0	0	0	0	0	0	0	0	0	0	0	0	0	0	NA	NA	0	0	0	0	0	0	0	0	0	0	NA	FALSE	FALSE
"1"	100709081	100710213	"+"	"ENSRNOG00000047254_002i"	"ENSRNOG00000047254"	"Izumo2"	1132	0	0	0	0	0	0	0	0	0	0	0	0	0	0	0	0	0	0	0	0	0	0	0	0	0	0	0	0	0	0	0	0	0	0	0	0	0	0	0	0	0	0	0	0	0	0	0	0	0	0	NA	NA	0	0	0	0	0	0	0	0	0	0	NA	FALSE	FALSE
"1"	100710301	100710482	"+"	"ENSRNOG00000047254_003i"	"ENSRNOG00000047254"	"Izumo2"	181	0	0	0	0	0	0	0	0	0	0	0	0	0	0	0	0	0	0	0	0	0	0	0	0	0	0	0	0	0	0	0	0	0	0	0	0	0	0	0	0	0	0	0	0	0	0	0	0	0	0	NA	NA	0	0	0	0	0	0	0	0	0	0	NA	FALSE	FALSE
"1"	100710504	100713319	"+"	"ENSRNOG00000047254_004i"	"ENSRNOG00000047254"	"Izumo2"	2815	0	0	0	0	0	0	0	0	0	0	1	0	0	0	0	0	0	0	0	0	0	0	0	0	0	0	0	0	0	0	0	0	0	0	0	0	0	0	0	0	0	0	0	0	0	0	0	0	0	0	NA	NA	0	0	0	0	0	0	0	0	0	0	NA	FALSE	FALSE
"1"	100713401	100716849	"+"	"ENSRNOG00000047254_005i"	"ENSRNOG00000047254"	"Izumo2"	3448	0	0	0	0	0	0	0	0	0	0	0	0	0	0	0	0	0	0	0	0	0	0	0	0	0	0	0	0	0	0	0	0	0	0	0	0	0	0	0	0	0	0	0	0	0	0	0	0	0	0	NA	NA	0	0	0	0	0	0	0	0	0	0	NA	FALSE	FALSE
"1"	100716974	100721208	"+"	"ENSRNOG00000047254_006i"	"ENSRNOG00000047254"	"Izumo2"	4234	0	0	0	0	0	0	0	0	0	0	0	0	0	0	0	0	0	0	0	0	0	0	0	0	0	0	0	0	0	0	0	0	0	0	0	0	0	0	0	0	0	0	0	0	0	0	0	0	0	0	NA	NA	0	0	0	0	0	0	0	0	0	0	NA	FALSE	FALSE
"1"	100739058	100741334	"-"	"ENSRNOG00000026572_001i"	"ENSRNOG00000026572"	"Zfp473"	2276	0	0	3	0	2	0	0	4	0	7	0	1	0	0	0	0	0	0	0	0	0	0	0	0	0	0	0	0	0	0	0	0	0	7	0	0	0	0	0	0	0	0	0	0	0	0	0	0	0	0	NA	NA	1	2.2	0.000439367311072056	0.000966608084358524	0	0	0	1.4	0	0	0.78845736036427	FALSE	FALSE
"1"	100741428	100743469	"-"	"ENSRNOG00000026572_002i"	"ENSRNOG00000026572"	"Zfp473"	2041	0	2	0	1	1	0	0	0	0	0	11	0	2	0	0	0	0	0	0	0	0	0	0	0	0	0	0	0	0	0	0	0	0	0	0	0	0	0	0	0	0	0	0	0	0	0	0	0	0	0	NA	NA	0.8	0	0.000391964723174914	0	0.4	0	0	0	0	0	-Inf	FALSE	FALSE
"1"	100743603	100745850	"-"	"ENSRNOG00000026572_003i"	"ENSRNOG00000026572"	"Zfp473"	2247	0	0	0	2	0	0	0	0	0	0	1	0	2	0	0	0	0	0	0	0	0	0	0	0	0	0	0	0	0	0	0	0	0	0	0	0	0	0	0	0	0	0	0	0	0	0	0	0	0	0	NA	NA	0.4	0	0.000178015131286159	0	0.4	0	0	0	0	0	-Inf	FALSE	FALSE
"1"	100755710	100758277	"+"	"ENSRNOG00000026517_001i"	"ENSRNOG00000026517"	"Vrk3"	2567	11	9	11	8	8	0	0	0	1	0	80	27	0	0	0	0	0	0	0	0	0	0	25	1	0	0	0	0	0	0	0	0	0	0	1	0	0	1	2	3	1	0	0	0	0	0	1	0	0	0	NA	NA	9.4	0.2	0.00366186209583171	7.79119594857811e-05	0	0	0	0	1.4	0	-3.85014760171006	FALSE	FALSE
"1"	100758340	100761973	"+"	"ENSRNOG00000026517_002i"	"ENSRNOG00000026517"	"Vrk3"	3633	30	48	46	56	40	0	2	2	6	1	44	2	10	13	7	3	4	18	4	0	2	0	32	2	1	0	2	4	2	0	0	0	0	0	3	0	0	0	1	1	0	0	0	0	0	0	0	0	0	0	NA	NA	44	2.2	0.0121112028626479	0.000605560143132398	7.4	4.8	1.8	0	0.4	0	-2.99573227355399	TRUE	FALSE
"1"	100762114	100765615	"+"	"ENSRNOG00000026517_003i"	"ENSRNOG00000026517"	"Vrk3"	3501	28	32	28	38	20	0	1	0	0	0	1	0	35	89	47	611	561	24	27	4	340	251	46	0	0	0	2	0	0	0	1	0	0	0	0	0	4	1	0	4	5	0	0	0	0	0	0	0	0	0	NA	NA	29.2	0.2	0.00834047415024279	5.71265352756355e-05	268.6	129.2	0.4	0.2	2.8	0	-4.98360662170834	TRUE	FALSE
"1"	100765766	100767577	"+"	"ENSRNOG00000026517_004i"	"ENSRNOG00000026517"	"Vrk3"	1811	4	7	7	8	14	0	0	0	0	1	0	0	6	14	10	5	7	7	0	8	8	4	70	1	0	0	0	0	0	0	0	0	0	0	0	0	0	0	0	0	0	0	0	0	0	0	0	0	0	0	NA	NA	8	0.2	0.00441744892324683	0.000110436223081171	8.4	5.4	0	0	0	0	-3.68887945411394	FALSE	FALSE
"1"	100767773	100768756	"+"	"ENSRNOG00000026517_005i"	"ENSRNOG00000026517"	"Vrk3"	983	3	11	0	2	4	0	0	0	0	0	0	0	5	17	11	10	23	0	5	0	17	18	55	2	3	0	0	0	0	0	0	0	0	0	0	0	0	0	0	2	0	0	0	0	0	0	0	0	0	0	NA	NA	4	0	0.00406917599186165	0	13.2	8	0.6	0	0.4	0	-Inf	FALSE	FALSE
"1"	100768822	100770608	"+"	"ENSRNOG00000026517_006i"	"ENSRNOG00000026517"	"Vrk3"	1786	0	9	1	1	8	0	0	0	0	1	0	0	3	5	8	54	69	0	5	0	14	13	31	5	0	0	0	0	0	0	0	0	0	0	0	0	0	0	0	0	3	0	0	0	0	0	0	0	0	0	NA	NA	3.8	0.2	0.00212765957446809	0.000111982082866741	27.8	6.4	0	0	0.6	0	-2.94443897916644	FALSE	FALSE
"1"	100770676	100771760	"+"	"ENSRNOG00000026517_007i"	"ENSRNOG00000026517"	"Vrk3"	1084	3	2	3	4	2	0	0	0	0	0	2	0	0	7	2	2	7	0	8	0	0	6	59	1	0	0	0	0	0	0	0	0	0	0	0	0	0	2	0	0	0	0	0	0	0	0	0	0	0	0	NA	NA	2.8	0	0.0025830258302583	0	3.6	2.8	0	0	0.4	0	-Inf	FALSE	FALSE
"1"	100771846	100772414	"+"	"ENSRNOG00000026517_008i"	"ENSRNOG00000026517"	"Vrk3"	568	0	4	0	5	3	0	0	0	0	0	2	0	0	1	0	2	4	0	0	3	6	6	50	1	0	1	0	1	0	0	0	0	0	0	0	0	0	0	0	1	1	0	0	0	0	0	0	0	0	0	NA	NA	2.4	0	0.00422535211267606	0	1.4	3	0.4	0	0.4	0	-Inf	FALSE	FALSE
"1"	100772521	100774553	"+"	"ENSRNOG00000026517_009i"	"ENSRNOG00000026517"	"Vrk3"	2032	11	4	5	6	11	14	0	0	0	0	6	0	0	0	0	1	2	6	0	5	9	4	62	1	0	0	1	0	1	0	0	0	0	0	0	0	2	4	0	0	0	0	0	0	0	0	0	0	0	0	NA	NA	7.4	2.8	0.00364173228346457	0.00137795275590551	0.6	4.8	0.4	0	1.2	0	-0.971860583028966	FALSE	FALSE
"1"	100774647	100775769	"+"	"ENSRNOG00000026517_010i"	"ENSRNOG00000026517"	"Vrk3"	1122	3	4	3	4	8	0	0	0	0	2	0	0	5	10	3	2	11	8	3	2	1	2	45	2	0	4	0	1	1	0	0	0	0	0	0	0	0	0	0	0	0	0	0	0	0	0	0	0	0	0	NA	NA	4.4	0.4	0.00392156862745098	0.00035650623885918	6.2	3.2	1.2	0	0	0	-2.39789527279837	FALSE	FALSE
"1"	100775903	100776860	"+"	"ENSRNOG00000026517_011i"	"ENSRNOG00000026517"	"Vrk3"	957	0	0	2	5	3	0	0	0	0	0	1	0	11	7	5	1	0	8	2	3	0	0	52	0	0	0	0	0	0	0	0	0	0	0	0	0	0	0	0	0	0	0	0	0	0	0	0	0	0	0	NA	NA	2	0	0.00208986415882968	0	4.8	2.6	0	0	0	0	-Inf	FALSE	FALSE
"1"	100776982	100780454	"+"	"ENSRNOG00000026517_012i"	"ENSRNOG00000026517"	"Vrk3"	3472	19	23	21	30	29	0	0	2	0	2	18	0	0	9	3	7	5	0	0	1	0	0	26	1	0	0	2	0	2	0	0	0	0	0	0	0	0	0	0	0	0	0	0	0	0	0	0	0	0	0	NA	NA	24.4	0.8	0.00702764976958525	0.000230414746543779	4.8	0.2	0.8	0	0	0	-3.41772668361337	TRUE	FALSE
"1"	100780514	100781251	"+"	"ENSRNOG00000026517_013i"	"ENSRNOG00000026517"	"Vrk3"	737	4	6	0	6	6	0	0	0	0	5	3	1	6	10	7	14	4	0	0	1	2	1	30	0	0	3	0	4	0	0	0	0	0	0	2	0	0	3	0	0	0	0	0	0	0	0	0	0	0	0	NA	NA	4.4	1	0.00597014925373134	0.00135685210312076	8.2	0.8	1.4	0	0.6	0	-1.48160454092422	FALSE	FALSE
"1"	100781412	100782742	"+"	"ENSRNOG00000026517_014i"	"ENSRNOG00000026517"	"Vrk3"	1330	3	2	11	22	13	0	0	0	0	0	12	0	11	26	16	6	4	12	14	11	11	18	14	0	0	0	4	0	2	0	0	0	0	0	0	0	0	0	0	3	1	0	0	0	0	0	0	0	0	0	NA	NA	10.2	0	0.00766917293233083	0	12.6	13.2	1.2	0	0.8	0	-Inf	TRUE	FALSE
"1"	100809076	100810327	"-"	"ENSRNOG00000020060_001i"	"ENSRNOG00000020060"	"Atf5"	1251	12	34	11	42	47	0	0	0	3	1	26	0	29	79	20	268	371	216	639	58	1853	1155	18	0	1	0	0	0	0	0	0	0	0	1	0	0	3	7	3	22	31	0	0	0	3	0	2	0	0	0	NA	NA	29.2	0.8	0.0233413269384492	0.000639488409272582	153.4	784.2	0.2	0.2	13.2	0.6	-3.59731226058845	TRUE	FALSE
"1"	100811814	100824806	"+"	"ENSRNOG00000048733_001i"	"ENSRNOG00000048733"	"Nup62"	12992	95	136	75	187	258	6	16	5	29	32	74	3	6	3	7	4	9	0	0	0	1	0	46	1	0	0	0	0	2	0	1	0	0	2	0	0	3	1	0	0	0	0	0	0	0	0	0	0	0	0	NA	70	150.2	17.6	0.011560960591133	0.00135467980295567	5.8	0.2	0.4	0.6	0.8	0	-2.14406883728593	TRUE	FALSE
"1"	100830101	100832323	"+"	"ENSRNOG00000020148_001i"	"ENSRNOG00000020148"	"Il4i1"	2222	4	5	2	9	15	0	0	0	0	6	7	0	0	0	0	0	0	0	0	0	0	0	0	0	0	0	0	0	0	0	0	0	0	0	0	0	0	0	0	0	0	0	0	0	0	0	0	0	0	0	NA	NA	7	1.2	0.00315031503150315	0.00054005400540054	0	0	0	0	0	0	-1.76358859226136	FALSE	FALSE
"1"	100832337	100832427	"+"	"ENSRNOG00000020148_002i"	"ENSRNOG00000020148"	"Il4i1"	90	0	0	0	0	0	0	0	0	0	0	0	0	0	0	0	0	0	0	0	0	0	0	0	0	0	0	0	0	0	0	0	0	0	0	0	0	0	0	0	0	0	0	0	0	0	0	0	0	0	0	NA	NA	0	0	0	0	0	0	0	0	0	0	NA	FALSE	FALSE
"1"	100832664	100833306	"+"	"ENSRNOG00000020148_003i"	"ENSRNOG00000020148"	"Il4i1"	642	0	0	0	1	6	0	0	0	0	0	0	0	0	0	0	0	0	0	0	0	0	0	0	0	0	0	0	0	0	0	0	0	0	0	0	0	0	0	0	0	3	0	0	0	0	0	0	0	0	0	NA	NA	1.4	0	0.00218068535825545	0	0	0	0	0	0.6	0	-Inf	FALSE	FALSE
"1"	100833420	100833928	"+"	"ENSRNOG00000020148_004i"	"ENSRNOG00000020148"	"Il4i1"	508	2	0	1	5	0	0	0	0	0	0	0	0	0	0	0	0	0	0	0	0	0	0	0	0	0	0	0	1	0	0	0	0	0	0	0	0	0	0	0	1	0	0	0	0	0	0	0	0	0	0	NA	NA	1.6	0	0.0031496062992126	0	0	0	0.2	0	0.2	0	-Inf	FALSE	FALSE
"1"	100834131	100835095	"+"	"ENSRNOG00000020148_005i"	"ENSRNOG00000020148"	"Il4i1"	964	0	1	0	3	2	0	0	0	3	5	0	0	0	0	0	0	0	0	0	0	0	0	0	0	0	0	0	0	1	0	0	0	0	0	0	0	0	0	0	0	0	0	0	0	0	0	0	0	0	0	NA	NA	1.2	1.6	0.0012448132780083	0.0016597510373444	0	0	0.2	0	0	0	0.287682072451781	FALSE	FALSE
"1"	100835165	100835255	"+"	"ENSRNOG00000020148_006i"	"ENSRNOG00000020148"	"Il4i1"	90	0	0	0	0	0	0	0	0	0	0	1	0	0	0	0	0	0	0	0	0	0	0	0	0	0	0	0	0	0	0	0	0	0	0	0	0	0	0	0	0	0	0	0	0	0	0	0	0	0	0	NA	NA	0	0	0	0	0	0	0	0	0	0	NA	FALSE	FALSE
"1"	100835393	100835524	"+"	"ENSRNOG00000020148_007i"	"ENSRNOG00000020148"	"Il4i1"	131	0	0	0	0	0	0	0	0	0	0	1	0	0	0	0	0	0	0	0	0	0	0	0	0	0	0	0	0	0	0	0	0	0	0	0	0	0	0	0	0	0	0	0	0	0	0	0	0	0	0	NA	NA	0	0	0	0	0	0	0	0	0	0	NA	FALSE	FALSE
"1"	100837381	100837509	"-"	"ENSRNOG00000020191_001i"	"ENSRNOG00000020191"	"Tbc1d17"	128	7	6	0	15	11	0	0	0	0	2	3	0	7	18	14	10	12	0	11	1	7	9	45	5	2	1	0	6	6	0	0	0	0	1	1	0	5	2	0	9	1	0	0	0	0	1	0	0	0	0	NA	NA	7.8	0.4	0.0609375	0.003125	12.2	5.6	3	0.2	3.4	0.2	-2.9704144655697	FALSE	FALSE
"1"	100837597	100837941	"-"	"ENSRNOG00000020191_002i"	"ENSRNOG00000020191"	"Tbc1d17"	344	1	0	6	2	3	0	0	0	0	0	6	0	4	1	2	1	1	0	0	0	0	0	51	0	0	0	0	0	0	0	0	0	0	0	0	0	0	0	0	0	2	0	0	0	0	0	1	0	0	0	NA	NA	2.4	0	0.00697674418604651	0	1.8	0	0	0	0.4	0	-Inf	FALSE	FALSE
"1"	100838059	100838148	"-"	"ENSRNOG00000020191_003i"	"ENSRNOG00000020191"	"Tbc1d17"	89	0	2	0	0	0	0	0	0	0	0	0	0	1	3	1	5	8	0	4	0	5	3	58	1	0	0	0	0	0	0	0	0	0	0	0	0	0	2	0	0	0	0	0	0	0	0	0	0	0	0	NA	NA	0.4	0	0.00449438202247191	0	3.6	2.4	0	0	0.4	0	-Inf	FALSE	FALSE
"1"	100838247	100838600	"-"	"ENSRNOG00000020191_004i"	"ENSRNOG00000020191"	"Tbc1d17"	353	0	0	0	0	0	0	0	0	0	0	0	0	1	9	0	5	4	0	0	0	0	0	47	2	0	0	0	0	0	0	0	0	0	0	0	0	0	0	0	0	0	0	0	0	0	0	0	0	0	0	NA	NA	0	0	0	0	3.8	0	0	0	0	0	NA	FALSE	FALSE
"1"	100838701	100838796	"-"	"ENSRNOG00000020191_005i"	"ENSRNOG00000020191"	"Tbc1d17"	95	0	0	0	1	1	0	0	0	0	0	0	0	0	2	2	3	2	0	0	0	0	0	31	1	0	0	0	0	1	0	0	0	0	0	0	0	0	0	0	1	0	0	0	0	0	0	0	0	0	0	NA	NA	0.4	0	0.00421052631578947	0	1.8	0	0.2	0	0.2	0	-Inf	FALSE	FALSE
"1"	100838898	100838979	"-"	"ENSRNOG00000020191_006i"	"ENSRNOG00000020191"	"Tbc1d17"	81	0	0	0	1	0	0	0	0	0	0	0	0	1	3	4	2	6	3	2	0	0	6	55	2	0	0	0	0	0	0	0	0	0	0	0	0	0	0	0	1	0	0	0	0	0	0	0	0	0	0	NA	NA	0.2	0	0.00246913580246914	0	3.2	2.2	0	0	0.2	0	-Inf	FALSE	FALSE
"1"	100839097	100839431	"-"	"ENSRNOG00000020191_007i"	"ENSRNOG00000020191"	"Tbc1d17"	334	1	4	0	0	0	0	0	0	0	0	6	0	1	7	2	2	6	7	2	1	0	0	33	1	0	0	0	0	0	0	0	0	0	0	0	0	0	4	0	0	0	0	0	0	0	0	0	0	0	0	NA	NA	1	0	0.0029940119760479	0	3.6	2	0	0	0.8	0	-Inf	FALSE	FALSE
"1"	100839527	100840102	"-"	"ENSRNOG00000020191_008i"	"ENSRNOG00000020191"	"Tbc1d17"	575	2	3	4	0	3	0	0	0	0	0	0	0	3	3	2	11	7	0	7	8	0	1	21	0	0	0	4	0	2	0	0	0	0	0	0	0	0	0	0	0	0	0	0	0	0	0	0	0	0	0	NA	NA	2.4	0	0.00417391304347826	0	5.2	3.2	1.2	0	0	0	-Inf	FALSE	FALSE
"1"	100840207	100840291	"-"	"ENSRNOG00000020191_009i"	"ENSRNOG00000020191"	"Tbc1d17"	84	0	0	2	0	1	0	0	0	0	0	0	0	3	6	2	4	4	0	0	0	0	0	26	10	0	0	0	0	1	0	0	0	0	0	0	0	0	0	2	0	0	0	0	0	0	0	0	0	0	0	NA	NA	0.6	0	0.00714285714285714	0	3.8	0	0.2	0	0.4	0	-Inf	FALSE	FALSE
"1"	100840421	100841107	"-"	"ENSRNOG00000020191_010i"	"ENSRNOG00000020191"	"Tbc1d17"	686	3	3	4	5	10	0	0	0	0	1	0	0	14	18	7	28	13	0	7	6	4	4	19	2	0	0	0	0	0	0	0	0	0	0	0	0	0	0	1	4	3	0	0	0	0	0	0	0	0	0	NA	NA	5	0.2	0.00728862973760933	0.000291545189504373	16	4.2	0	0	1.6	0	-3.2188758248682	TRUE	FALSE
"1"	100841270	100841358	"-"	"ENSRNOG00000020191_011i"	"ENSRNOG00000020191"	"Tbc1d17"	88	4	4	1	5	1	0	0	0	0	0	0	0	17	27	14	23	15	8	5	3	1	12	49	5	0	3	1	1	0	0	0	0	0	0	0	0	4	2	0	4	1	0	0	0	0	0	0	0	0	0	NA	NA	3	0	0.0340909090909091	0	19.2	5.8	1	0	2.2	0	-Inf	TRUE	FALSE
"1"	100841471	100841972	"-"	"ENSRNOG00000020191_012i"	"ENSRNOG00000020191"	"Tbc1d17"	501	3	7	1	10	10	0	0	0	0	0	0	0	56	38	30	87	91	6	23	4	35	39	31	5	0	0	0	1	0	0	0	0	0	0	0	0	3	5	1	5	7	0	0	0	0	0	0	0	0	0	NA	NA	6.2	0	0.012375249500998	0	60.4	21.4	0.2	0	4.2	0	-Inf	TRUE	FALSE
"1"	100842181	100842900	"-"	"ENSRNOG00000020191_013i"	"ENSRNOG00000020191"	"Tbc1d17"	719	2	1	1	2	2	0	0	0	0	1	0	0	5	11	15	9	12	9	10	0	2	13	27	1	0	0	0	0	0	0	0	0	0	0	0	0	0	0	0	0	0	0	0	0	0	1	0	0	0	0	NA	NA	1.6	0.2	0.00222531293463143	0.000278164116828929	10.4	6.8	0	0	0	0.2	-2.07944154167984	FALSE	FALSE
"1"	100843025	100844595	"-"	"ENSRNOG00000020191_014i"	"ENSRNOG00000020191"	"Tbc1d17"	1570	3	4	6	9	8	0	0	0	0	0	4	0	7	7	10	7	7	3	0	0	0	4	32	5	0	0	1	0	4	0	0	0	0	0	0	0	0	0	1	1	0	0	0	0	0	0	0	0	0	0	NA	NA	6	0	0.00382165605095541	0	7.6	1.4	1	0	0.4	0	-Inf	FALSE	FALSE
"1"	100844671	100844764	"-"	"ENSRNOG00000020191_015i"	"ENSRNOG00000020191"	"Tbc1d17"	93	0	1	1	0	0	0	0	0	0	0	2	0	8	8	6	3	5	6	0	2	0	3	60	2	0	0	1	0	0	0	0	0	0	0	0	0	0	1	1	0	0	0	0	0	0	0	0	0	0	0	NA	NA	0.4	0	0.0043010752688172	0	6	2.2	0.2	0	0.4	0	-Inf	FALSE	FALSE
"1"	100844864	100845175	"-"	"ENSRNOG00000020191_016i"	"ENSRNOG00000020191"	"Tbc1d17"	311	4	3	12	7	14	0	8	6	0	0	24	0	0	0	1	0	0	0	0	0	0	0	22	8	0	0	0	0	0	0	0	0	0	0	0	0	0	0	5	0	2	0	0	0	0	0	1	0	0	0	NA	NA	8	2.8	0.0257234726688103	0.0090032154340836	0.2	0	0	0	1.4	0	-1.04982212449868	TRUE	FALSE
"1"	100845674	100848843	"+"	"ENSRNOG00000020289_001i"	"ENSRNOG00000020289"	"Akt1s1"	3169	67	75	44	65	125	13	18	11	0	8	749	45	0	1	0	0	2	0	0	0	0	0	24	2	4	0	0	0	0	0	0	0	0	0	0	0	3	0	0	0	2	0	0	0	0	0	3	0	0	0	NA	NA	75.2	10	0.0237298832439255	0.00315556958030925	0.6	0	0.8	0	1	0	-2.01756613796175	TRUE	FALSE
"1"	100849233	100850055	"+"	"ENSRNOG00000020289_002i"	"ENSRNOG00000020289"	"Akt1s1"	822	1	2	10	4	5	0	5	0	0	0	4	0	22	35	29	36	44	26	29	14	50	33	44	0	1	0	0	0	1	0	0	0	0	0	0	0	0	0	4	0	1	0	0	0	0	0	0	0	0	0	NA	NA	4.4	1	0.00535279805352798	0.00121654501216545	33.2	30.4	0.4	0	1	0	-1.48160454092422	TRUE	FALSE
"1"	100850134	100850214	"+"	"ENSRNOG00000020289_003i"	"ENSRNOG00000020289"	"Akt1s1"	80	6	2	0	1	11	0	7	0	11	13	37	0	28	44	26	34	60	14	23	17	41	40	86	0	4	2	0	0	2	0	7	0	0	2	12	0	3	2	0	1	9	0	0	0	11	11	11	0	0	0	NA	NA	4	6.2	0.05	0.0775	38.4	27	1.6	1.8	3	4.4	0.438254930931155	FALSE	FALSE
"1"	100850385	100851127	"+"	"ENSRNOG00000020289_004i"	"ENSRNOG00000020289"	"Akt1s1"	742	0	6	3	14	4	0	0	0	0	0	10	0	2	8	0	5	2	8	11	0	0	7	130	0	0	3	0	0	0	0	0	0	0	0	0	0	0	0	0	0	0	0	0	0	0	0	1	0	0	0	NA	NA	5.4	0	0.00727762803234501	0	3.4	5.2	0.6	0	0	0	-Inf	FALSE	FALSE
"1"	100854122	100854673	"+"	"ENSRNOG00000020318_002i"	"ENSRNOG00000020318"	"Pnkp"	551	7	3	8	7	3	12	0	0	0	1	12	1	5	3	0	2	2	0	0	4	0	3	1	0	0	0	1	0	0	0	0	0	0	0	1	0	4	0	1	1	0	0	0	0	0	0	0	0	0	0	NA	NA	5.6	2.6	0.0101633393829401	0.00471869328493648	2.4	1.4	0.2	0	1.2	0	-0.767255152713667	TRUE	FALSE
"1"	100854721	100854946	"+"	"ENSRNOG00000020318_003i"	"ENSRNOG00000020318"	"Pnkp"	225	6	6	2	0	7	1	0	0	3	0	0	0	1	10	4	0	0	0	0	8	0	0	7	0	4	2	1	0	0	0	0	0	0	0	0	0	1	4	1	0	4	0	0	0	3	0	0	0	0	0	NA	NA	4.2	0.8	0.0186666666666667	0.00355555555555556	3	1.6	1.4	0	2	0.6	-1.65822807660353	FALSE	FALSE
"1"	100855244	100856274	"+"	"ENSRNOG00000020318_004i"	"ENSRNOG00000020318"	"Pnkp"	1030	6	4	9	10	12	1	0	3	0	0	4	0	9	20	10	15	20	3	5	3	3	17	20	0	3	0	0	1	0	0	0	0	0	0	0	0	1	0	2	3	3	0	0	0	0	0	0	0	0	0	NA	NA	8.2	0.8	0.00796116504854369	0.000776699029126214	14.8	6.2	0.8	0	1.8	0	-2.32727770558442	TRUE	FALSE
"1"	100856355	100856439	"+"	"ENSRNOG00000020318_005i"	"ENSRNOG00000020318"	"Pnkp"	84	5	4	0	2	2	0	0	10	0	0	1	0	3	10	4	0	3	0	1	0	6	0	2	0	3	2	0	1	2	0	0	9	0	0	0	0	2	2	0	2	1	0	0	10	0	0	0	0	0	0	NA	NA	2.6	2	0.030952380952381	0.0238095238095238	4	1.4	1.6	1.8	1.4	2	-0.262364264467491	FALSE	FALSE
"1"	100856498	100856762	"+"	"ENSRNOG00000020318_006i"	"ENSRNOG00000020318"	"Pnkp"	264	1	0	1	7	0	0	0	1	0	0	8	0	0	8	4	0	0	0	0	0	0	0	7	0	0	0	0	0	0	0	0	0	0	0	0	0	1	0	1	6	0	0	0	0	0	0	0	0	0	0	NA	NA	1.8	0.2	0.00681818181818182	0.000757575757575758	2.4	0	0	0	1.6	0	-2.19722457733622	FALSE	FALSE
"1"	100856871	100857024	"+"	"ENSRNOG00000020318_007i"	"ENSRNOG00000020318"	"Pnkp"	153	0	0	0	0	2	0	0	0	0	0	0	0	4	2	6	0	4	0	5	12	0	0	10	0	0	0	0	0	2	0	0	0	0	0	0	0	0	0	0	0	0	0	0	0	0	0	0	0	0	0	NA	NA	0.4	0	0.00261437908496732	0	3.2	3.4	0.4	0	0	0	-Inf	FALSE	FALSE
"1"	100857097	100857481	"+"	"ENSRNOG00000020318_008i"	"ENSRNOG00000020318"	"Pnkp"	384	2	4	1	2	3	0	0	0	0	0	0	0	3	6	0	0	0	0	4	0	0	0	2	2	0	0	0	0	0	0	0	0	0	0	0	0	2	0	0	1	0	0	0	0	0	0	0	0	0	0	NA	NA	2.4	0	0.00625	0	1.8	0.8	0	0	0.6	0	-Inf	TRUE	FALSE
"1"	100857531	100857606	"+"	"ENSRNOG00000020318_009i"	"ENSRNOG00000020318"	"Pnkp"	75	2	1	0	1	5	0	0	0	0	0	0	0	3	2	2	6	7	4	5	1	2	0	19	0	2	1	0	1	1	0	0	0	0	0	0	0	0	0	0	0	4	0	0	0	0	0	0	0	0	0	NA	NA	1.8	0	0.024	0	4	2.4	1	0	0.8	0	-Inf	FALSE	FALSE
"1"	100857678	100857766	"+"	"ENSRNOG00000020318_010i"	"ENSRNOG00000020318"	"Pnkp"	88	4	2	1	6	8	0	0	0	0	0	0	0	7	11	0	1	11	11	5	0	9	0	20	0	0	2	0	4	8	0	0	0	0	0	0	0	4	0	1	2	0	0	0	0	0	0	0	0	0	0	NA	NA	4.2	0	0.0477272727272727	0	6	5	2.8	0	1.4	0	-Inf	TRUE	FALSE
"1"	100857860	100857943	"+"	"ENSRNOG00000020318_011i"	"ENSRNOG00000020318"	"Pnkp"	83	0	5	1	6	5	0	0	0	1	0	0	0	24	16	27	17	15	4	14	20	7	9	24	0	0	5	0	6	4	0	0	0	0	0	0	0	0	1	1	0	1	0	0	0	1	0	0	0	0	0	NA	NA	3.4	0.2	0.0409638554216867	0.00240963855421687	19.8	10.8	3	0	0.6	0.2	-2.83321334405622	FALSE	FALSE
"1"	100858041	100858125	"+"	"ENSRNOG00000020318_012i"	"ENSRNOG00000020318"	"Pnkp"	84	2	6	11	7	12	0	2	0	0	0	3	0	3	1	2	0	1	3	4	0	2	1	10	0	2	6	10	4	10	0	2	0	0	0	0	0	0	1	1	3	2	0	0	0	0	0	1	0	0	0	NA	NA	7.6	0.4	0.0904761904761905	0.00476190476190476	1.4	2	6.4	0.4	1.4	0	-2.94443897916644	TRUE	FALSE
"1"	100858188	100858278	"+"	"ENSRNOG00000020318_013i"	"ENSRNOG00000020318"	"Pnkp"	90	0	0	0	1	5	0	0	0	0	0	0	0	14	4	8	7	20	10	0	5	0	6	12	0	0	0	0	1	2	0	0	0	0	0	0	0	0	0	0	0	3	0	0	0	0	0	0	0	0	0	NA	NA	1.2	0	0.0133333333333333	0	10.6	4.2	0.6	0	0.6	0	-Inf	FALSE	FALSE
"1"	100858389	100858460	"+"	"ENSRNOG00000020318_014i"	"ENSRNOG00000020318"	"Pnkp"	71	0	1	1	0	1	0	0	0	0	0	0	0	2	3	5	6	5	5	3	6	0	0	21	0	0	1	0	0	0	0	0	0	0	0	0	0	0	0	1	0	1	0	0	0	0	0	0	0	0	0	NA	NA	0.6	0	0.00845070422535211	0	4.2	2.8	0.2	0	0.4	0	-Inf	FALSE	FALSE
"1"	100858549	100858622	"+"	"ENSRNOG00000020318_015i"	"ENSRNOG00000020318"	"Pnkp"	73	1	0	0	1	1	0	0	2	0	0	0	0	1	7	7	4	3	5	3	8	0	1	34	0	1	0	0	1	1	0	0	2	0	0	0	0	1	0	0	0	0	0	0	0	0	0	0	0	0	0	NA	NA	0.6	0.4	0.00821917808219178	0.00547945205479452	4.4	3.4	0.6	0.4	0.2	0	-0.405465108108164	FALSE	FALSE
"1"	100859724	100859809	"-"	"ENSRNOG00000020358_001i"	"ENSRNOG00000020358"	"Ptov1"	85	0	1	3	3	0	3	0	0	0	0	31	1	28	35	26	23	29	29	17	8	13	15	352	18	0	0	0	0	0	3	0	0	0	0	9	1	0	1	3	3	0	0	0	0	0	0	19	0	0	0	NA	NA	1.4	0.6	0.0164705882352941	0.00705882352941176	28.2	16.4	0	0.6	1.4	0	-0.847297860387204	FALSE	FALSE
"1"	100860008	100860630	"-"	"ENSRNOG00000020358_002i"	"ENSRNOG00000020358"	"Ptov1"	622	7	7	8	27	12	0	1	0	0	0	27	0	57	46	56	55	42	56	21	16	13	18	595	11	2	3	3	8	0	0	1	0	0	0	0	0	0	0	1	5	1	0	0	0	0	0	0	0	0	0	NA	NA	12.2	0.2	0.0196141479099678	0.000321543408360129	51.2	24.8	3.2	0.2	1.4	0	-4.11087386417331	TRUE	FALSE
"1"	100860736	100860859	"-"	"ENSRNOG00000020358_003i"	"ENSRNOG00000020358"	"Ptov1"	123	0	0	2	0	2	0	0	0	0	0	2	0	40	26	19	19	13	25	24	13	9	4	879	20	0	0	2	0	0	0	0	0	0	0	2	0	0	0	0	0	2	0	0	0	0	0	0	0	0	0	NA	NA	0.8	0	0.00650406504065041	0	23.4	15	0.4	0	0.4	0	-Inf	FALSE	FALSE
"1"	100860918	100861005	"-"	"ENSRNOG00000020358_004i"	"ENSRNOG00000020358"	"Ptov1"	87	3	3	2	1	1	0	0	0	0	0	1	0	8	18	22	11	19	17	20	3	4	2	1173	23	0	2	0	0	1	0	0	0	0	0	0	0	3	0	2	1	1	0	0	0	0	0	1	0	0	0	NA	NA	2	0	0.0229885057471264	0	15.6	9.2	0.6	0	1.4	0	-Inf	TRUE	FALSE
"1"	100861080	100861155	"-"	"ENSRNOG00000020358_005i"	"ENSRNOG00000020358"	"Ptov1"	75	0	3	5	2	4	5	0	0	0	0	5	0	17	46	14	61	79	0	25	5	25	18	831	48	0	0	5	0	2	0	0	0	0	0	0	0	0	2	4	2	2	5	0	0	0	0	2	0	0	0	NA	NA	2.8	1	0.0373333333333333	0.0133333333333333	43.4	14.6	1.4	0	2	1	-1.02961941718116	FALSE	FALSE
"1"	100861246	100861756	"-"	"ENSRNOG00000020358_006i"	"ENSRNOG00000020358"	"Ptov1"	510	2	2	3	9	7	0	3	0	0	0	3	0	27	28	18	28	22	9	21	1	1	10	732	35	2	0	0	0	2	0	0	0	0	0	1	0	0	2	1	0	0	0	0	0	0	0	0	0	0	0	NA	NA	4.6	0.6	0.00901960784313725	0.00117647058823529	24.6	8.4	0.8	0	0.6	0	-2.03688192726104	TRUE	FALSE
"1"	100861913	100863071	"-"	"ENSRNOG00000020358_007i"	"ENSRNOG00000020358"	"Ptov1"	1158	20	17	13	50	45	7	0	0	0	6	67	0	57	101	52	48	24	68	47	25	9	19	508	21	2	1	0	6	3	0	0	0	0	0	2	0	3	15	5	14	11	0	0	0	0	0	0	0	0	0	NA	NA	29	2.6	0.0250431778929188	0.00224525043177893	56.4	33.6	2.4	0	9.6	0	-2.41178438495904	TRUE	FALSE
"1"	100863180	100863318	"-"	"ENSRNOG00000020358_008i"	"ENSRNOG00000020358"	"Ptov1"	138	2	5	7	7	0	0	0	0	0	0	0	0	39	51	60	66	87	49	16	29	66	33	798	25	1	5	2	6	0	0	0	0	0	0	0	0	1	0	5	0	0	0	0	0	0	0	0	0	0	0	NA	NA	4.2	0	0.0304347826086957	0	60.6	38.6	2.8	0	1.2	0	-Inf	FALSE	FALSE
"1"	100863377	100863451	"-"	"ENSRNOG00000020358_009i"	"ENSRNOG00000020358"	"Ptov1"	74	2	2	2	3	3	0	0	0	0	0	16	0	12	15	23	13	19	27	13	16	5	9	1037	18	1	0	2	3	3	0	0	0	0	0	3	0	1	2	1	1	1	0	0	0	0	0	9	0	0	0	NA	NA	2.4	0	0.0324324324324324	0	16.4	14	1.8	0	1.2	0	-Inf	TRUE	FALSE
"1"	100863535	100863631	"-"	"ENSRNOG00000020358_010i"	"ENSRNOG00000020358"	"Ptov1"	96	0	8	2	2	0	0	0	0	0	0	0	0	30	57	35	30	34	34	15	15	9	12	362	24	0	1	0	0	0	0	0	0	0	0	0	0	0	7	2	2	0	0	0	0	0	0	0	0	0	0	NA	NA	2.4	0	0.025	0	37.2	17	0.2	0	2.2	0	-Inf	FALSE	FALSE
"1"	100863770	100865615	"-"	"ENSRNOG00000020358_011i"	"ENSRNOG00000020358"	"Ptov1"	1845	23	18	25	23	29	0	0	0	1	3	21	2	2	7	10	10	8	6	2	3	7	0	154	38	0	0	1	2	1	0	0	0	0	0	0	0	0	2	2	5	1	0	0	0	0	0	0	0	0	0	NA	NA	23.6	0.8	0.0127913279132791	0.00043360433604336	7.4	3.6	0.8	0	2	0	-3.38439026334577	TRUE	FALSE
"1"	100875109	100875520	"-"	"ENSRNOG00000020363_001i"	"ENSRNOG00000020363"	"Med25"	411	7	5	0	10	2	0	0	0	0	0	8	0	14	9	9	17	24	6	28	3	6	5	126	5	1	0	0	1	0	0	0	0	0	0	0	0	6	4	0	4	1	0	0	0	0	0	3	0	0	0	NA	NA	4.8	0	0.0116788321167883	0	14.6	9.6	0.4	0	3	0	-Inf	FALSE	FALSE
"1"	100875699	100875844	"-"	"ENSRNOG00000020363_002i"	"ENSRNOG00000020363"	"Med25"	145	0	0	0	0	0	0	1	0	0	0	1	0	15	15	9	63	93	9	21	7	46	45	185	2	0	0	0	0	0	0	1	0	0	0	0	0	0	0	0	0	0	0	0	0	0	0	0	0	0	0	NA	NA	0	0.2	0	0.00137931034482759	39	25.6	0	0.2	0	0	Inf	FALSE	FALSE
"1"	100876064	100876160	"-"	"ENSRNOG00000020363_003i"	"ENSRNOG00000020363"	"Med25"	96	0	0	0	5	6	0	0	0	0	0	24	0	7	6	3	13	14	2	0	0	2	5	166	0	0	0	0	4	2	0	0	0	0	0	7	0	0	0	0	1	4	0	0	0	0	0	0	0	0	0	NA	NA	2.2	0	0.0229166666666667	0	8.6	1.8	1.2	0	1	0	-Inf	FALSE	FALSE
"1"	100876233	100876502	"-"	"ENSRNOG00000020363_004i"	"ENSRNOG00000020363"	"Med25"	269	4	0	15	31	48	0	0	1	0	0	26	0	3	12	20	14	14	4	21	8	28	15	137	3	0	0	1	1	5	0	0	0	0	0	4	0	1	0	9	10	6	0	0	1	0	0	2	0	0	0	NA	NA	19.6	0.2	0.0728624535315985	0.000743494423791822	12.6	15.2	1.4	0	5.2	0.2	-4.58496747867057	FALSE	FALSE
"1"	100876692	100878394	"-"	"ENSRNOG00000020363_005i"	"ENSRNOG00000020363"	"Med25"	1702	8	23	8	47	53	0	0	0	0	1	11	0	8	22	4	14	22	13	12	5	7	15	128	3	0	7	0	0	2	0	0	0	0	0	1	0	3	6	1	5	4	0	0	0	0	0	0	0	0	0	NA	NA	27.8	0.2	0.0163337250293772	0.000117508813160987	14	10.4	1.8	0	3.8	0	-4.93447393313069	TRUE	FALSE
"1"	100878503	100878605	"-"	"ENSRNOG00000020363_006i"	"ENSRNOG00000020363"	"Med25"	102	0	0	0	1	3	0	0	0	0	0	3	0	4	2	3	24	13	8	1	6	4	7	173	3	0	0	0	0	2	0	0	0	0	0	0	0	0	0	0	1	0	0	0	0	0	0	1	0	0	0	NA	NA	0.8	0	0.00784313725490196	0	9.2	5.2	0.4	0	0.2	0	-Inf	FALSE	FALSE
"1"	100878664	100878736	"-"	"ENSRNOG00000020363_007i"	"ENSRNOG00000020363"	"Med25"	72	0	1	0	8	1	0	0	0	0	0	0	0	7	8	2	10	18	11	3	7	7	1	191	1	0	1	0	8	1	0	0	0	0	0	0	0	0	0	0	0	1	0	0	0	0	0	0	0	0	0	NA	NA	2	0	0.0277777777777778	0	9	5.8	2	0	0.2	0	-Inf	FALSE	FALSE
"1"	100878823	100879391	"-"	"ENSRNOG00000020363_008i"	"ENSRNOG00000020363"	"Med25"	568	0	0	0	1	4	0	0	0	0	0	0	0	3	3	2	0	1	0	0	0	4	0	95	3	0	0	0	0	3	0	0	0	0	0	0	0	0	0	0	0	0	0	0	0	0	0	0	0	0	0	NA	NA	1	0	0.00176056338028169	0	1.8	0.8	0.6	0	0	0	-Inf	FALSE	FALSE
"1"	100879524	100879851	"-"	"ENSRNOG00000020363_009i"	"ENSRNOG00000020363"	"Med25"	327	0	3	1	1	0	0	0	0	1	0	13	0	3	2	5	2	6	1	0	0	5	3	17	3	0	0	0	0	0	0	0	0	0	0	0	0	0	0	0	0	0	0	0	0	1	0	0	0	0	0	NA	NA	1	0.2	0.00305810397553517	0.000611620795107034	3.6	1.8	0	0	0	0.2	-1.6094379124341	FALSE	FALSE
"1"	100880046	100880121	"-"	"ENSRNOG00000020363_010i"	"ENSRNOG00000020363"	"Med25"	75	4	9	0	18	21	0	0	0	1	0	0	0	19	21	16	29	30	7	20	14	33	59	135	0	0	4	0	18	20	0	0	0	1	0	0	0	4	9	0	0	3	0	0	0	0	0	0	0	0	0	NA	NA	10.4	0.2	0.138666666666667	0.00266666666666667	23	26.6	8.4	0.2	3.2	0	-3.95124371858143	FALSE	FALSE
"1"	100880210	100880431	"-"	"ENSRNOG00000020363_011i"	"ENSRNOG00000020363"	"Med25"	221	0	0	0	0	0	0	0	0	0	0	0	0	7	22	10	3	13	7	6	2	3	4	37	5	0	0	0	0	0	0	0	0	0	0	0	0	0	0	0	0	0	0	0	0	0	0	0	0	0	0	NA	NA	0	0	0	0	11	4.4	0	0	0	0	NA	FALSE	FALSE
"1"	100880563	100880686	"-"	"ENSRNOG00000020363_012i"	"ENSRNOG00000020363"	"Med25"	123	1	0	8	0	6	0	0	0	0	0	0	0	20	22	19	92	101	15	16	2	118	60	103	0	0	0	0	0	0	0	0	0	0	0	0	0	1	0	8	0	1	0	0	0	0	0	0	0	0	0	NA	NA	3	0	0.024390243902439	0	50.8	42.2	0	0	2	0	-Inf	FALSE	FALSE
"1"	100880850	100881111	"-"	"ENSRNOG00000020363_013i"	"ENSRNOG00000020363"	"Med25"	261	0	1	0	6	11	0	0	0	0	0	0	0	16	11	4	11	23	21	4	4	10	9	72	5	0	0	0	0	0	0	0	0	0	0	0	0	0	1	0	2	2	0	0	0	0	0	0	0	0	0	NA	NA	3.6	0	0.0137931034482759	0	13	9.6	0	0	1	0	-Inf	FALSE	FALSE
"1"	100881233	100881508	"-"	"ENSRNOG00000020363_014i"	"ENSRNOG00000020363"	"Med25"	275	1	3	6	13	25	0	5	0	3	4	15	0	19	20	21	69	102	11	11	3	67	49	174	3	0	0	2	4	4	0	0	0	0	2	1	0	1	1	0	9	20	0	0	0	3	1	1	0	0	0	31	NA	9.6	2.4	0.0349090909090909	0.00872727272727273	46.2	28.2	2	0.4	6.2	0.8	-1.38629436111989	TRUE	FALSE
"1"	100881608	100887230	"-"	"ENSRNOG00000020363_015i"	"ENSRNOG00000020363"	"Med25"	5622	7	22	17	41	60	0	0	0	9	1	23	0	1	7	4	10	13	0	0	1	15	17	145	1	0	0	0	0	0	0	0	0	0	0	0	0	1	0	0	3	1	0	0	0	0	0	0	0	0	0	NA	NA	29.4	2	0.00522945570971185	0.000355745286374956	7	6.6	0	0	1	0	-2.68784749378469	TRUE	FALSE
"1"	100887356	100887544	"-"	"ENSRNOG00000020363_016i"	"ENSRNOG00000020363"	"Med25"	188	5	0	4	1	1	0	0	0	0	0	0	0	0	2	0	10	4	10	9	2	6	6	62	15	0	0	0	1	1	0	0	0	0	0	0	0	5	0	4	0	0	0	0	0	0	0	0	0	0	0	NA	NA	2.2	0	0.0117021276595745	0	3.2	6.6	0.4	0	1.8	0	-Inf	FALSE	FALSE
"1"	100887591	100887668	"-"	"ENSRNOG00000020363_017i"	"ENSRNOG00000020363"	"Med25"	77	0	1	0	1	4	10	7	0	4	2	58	3	0	4	4	2	1	0	6	0	6	0	84	2	0	1	0	0	3	4	7	0	4	2	22	2	0	0	0	1	1	0	0	0	0	0	4	0	0	0	NA	NA	1.2	4.6	0.0155844155844156	0.0597402597402597	2.2	2.4	0.8	3.4	0.4	0	1.34373474670109	FALSE	FALSE
"1"	100892117	100892332	"+"	"ENSRNOG00000053084_002i"	"ENSRNOG00000053084"	"Fuz"	215	0	0	0	1	1	2	0	0	0	0	0	0	13	13	9	6	4	10	1	4	0	3	10	0	0	0	0	1	0	2	0	0	0	0	0	0	0	0	0	0	1	0	0	0	0	0	0	0	0	0	NA	NA	0.4	0.4	0.00186046511627907	0.00186046511627907	9	3.6	0.2	0.4	0.2	0	0	FALSE	FALSE
"1"	100892455	100892645	"+"	"ENSRNOG00000053084_003i"	"ENSRNOG00000053084"	"Fuz"	190	1	14	2	6	0	0	0	0	0	1	0	0	5	2	2	2	2	0	4	0	0	2	26	3	0	8	1	4	0	0	0	0	0	1	0	0	1	0	0	0	0	0	0	0	0	0	0	0	0	0	NA	NA	4.6	0.2	0.0242105263157895	0.00105263157894737	2.6	1.2	2.6	0.2	0.2	0	-3.13549421592915	FALSE	FALSE
"1"	100892731	100892990	"+"	"ENSRNOG00000053084_004i"	"ENSRNOG00000053084"	"Fuz"	259	14	4	4	7	25	0	0	0	0	0	1	0	9	11	5	2	4	10	0	4	0	6	18	1	4	2	2	1	7	0	0	0	0	0	0	0	3	0	0	1	1	0	0	0	0	0	0	0	0	0	NA	NA	10.8	0	0.0416988416988417	0	6.2	4	3.2	0	1	0	-Inf	TRUE	FALSE
"1"	100893060	100893259	"+"	"ENSRNOG00000053084_005i"	"ENSRNOG00000053084"	"Fuz"	199	4	0	0	5	1	0	0	0	0	1	4	0	4	6	2	0	2	0	0	0	0	0	28	2	1	0	0	0	0	0	0	0	0	1	0	0	3	0	0	5	0	0	0	0	0	0	3	0	0	0	NA	NA	2	0.2	0.0100502512562814	0.00100502512562814	2.8	0	0.2	0.2	1.6	0	-2.30258509299405	FALSE	FALSE
"1"	100893365	100894602	"+"	"ENSRNOG00000053084_006i"	"ENSRNOG00000053084"	"Fuz"	1237	14	23	14	60	52	0	8	3	5	1	70	0	2	0	0	0	1	0	0	4	0	1	3	0	0	0	2	2	2	0	5	3	0	0	13	0	0	3	2	0	2	0	0	0	1	0	1	0	0	0	NA	NA	32.6	3.4	0.0263540824575586	0.00274858528698464	0.6	1	1.2	1.6	1.4	0.2	-2.26053685675055	TRUE	FALSE
"1"	100894801	100894874	"+"	"ENSRNOG00000053084_007i"	"ENSRNOG00000053084"	"Fuz"	73	0	0	0	0	1	0	0	0	0	0	5	0	6	5	5	5	4	3	3	1	0	0	8	1	0	0	0	0	1	0	0	0	0	0	1	0	0	0	0	0	0	0	0	0	0	0	0	0	0	0	NA	NA	0.2	0	0.00273972602739726	0	5	1.4	0.2	0	0	0	-Inf	FALSE	FALSE
"1"	100894971	100895111	"+"	"ENSRNOG00000053084_008i"	"ENSRNOG00000053084"	"Fuz"	140	4	4	4	1	21	2	3	0	0	0	2	0	4	9	6	0	2	2	4	3	0	0	25	2	3	2	4	0	3	0	0	0	0	0	2	0	0	0	0	0	1	0	0	0	0	0	0	0	0	0	NA	NA	6.8	1	0.0485714285714286	0.00714285714285714	4.2	1.8	2.4	0	0.2	0	-1.91692261218206	TRUE	FALSE
"1"	100895219	100895298	"+"	"ENSRNOG00000053084_009i"	"ENSRNOG00000053084"	"Fuz"	79	0	9	2	5	6	4	5	0	0	2	19	1	9	2	7	6	6	1	0	3	1	0	23	0	0	4	1	5	6	0	5	0	0	0	9	1	0	8	1	0	0	4	0	0	0	2	8	0	0	0	NA	NA	4.4	2.2	0.0556962025316456	0.0278481012658228	6	1	3.2	1	1.8	1.2	-0.693147180559945	FALSE	FALSE
"1"	100895364	100895436	"+"	"ENSRNOG00000053084_010i"	"ENSRNOG00000053084"	"Fuz"	72	2	4	1	3	3	0	0	0	0	0	3	0	18	27	17	10	41	10	3	27	8	8	16	0	0	0	0	0	1	0	0	0	0	0	0	0	2	4	1	3	3	0	0	0	0	0	0	0	0	0	NA	NA	2.6	0	0.0361111111111111	0	22.6	11.2	0.2	0	2.6	0	-Inf	TRUE	FALSE
"1"	100895512	100896335	"+"	"ENSRNOG00000053084_011i"	"ENSRNOG00000053084"	"Fuz"	823	4	16	10	16	16	0	0	0	5	0	11	0	5	12	7	7	7	13	7	14	0	17	64	2	0	10	3	0	6	0	0	0	0	0	1	0	0	1	0	1	0	0	0	0	0	0	2	0	0	0	NA	NA	12.4	1	0.0150668286755772	0.00121506682867558	7.6	10.2	3.8	0	0.4	0	-2.51769647261099	TRUE	FALSE
"1"	100897025	100897174	"-"	"ENSRNOG00000026243_001i"	"ENSRNOG00000026243"	"Ap2a1"	149	2	0	1	7	7	0	0	0	0	0	0	0	17	11	16	33	50	0	36	13	17	18	420	15	0	0	0	1	4	0	0	0	0	0	0	0	2	0	1	0	1	0	0	0	0	0	0	0	0	0	NA	NA	3.4	0	0.0228187919463087	0	25.4	16.8	1	0	0.8	0	-Inf	FALSE	FALSE
"1"	100897310	100897430	"-"	"ENSRNOG00000026243_002i"	"ENSRNOG00000026243"	"Ap2a1"	120	2	0	0	1	1	0	0	0	0	0	1	0	20	19	17	21	16	0	0	13	4	2	301	94	2	0	0	0	0	0	0	0	0	0	0	0	0	0	0	1	1	0	0	0	0	0	0	0	0	0	NA	NA	0.8	0	0.00666666666666667	0	18.6	3.8	0.4	0	0.4	0	-Inf	FALSE	FALSE
"1"	100897501	100897596	"-"	"ENSRNOG00000026243_003i"	"ENSRNOG00000026243"	"Ap2a1"	95	0	0	0	0	0	0	0	0	0	0	0	1	53	48	76	55	95	25	38	24	49	38	292	2	0	0	0	0	0	0	0	0	0	0	0	0	0	0	0	0	0	0	0	0	0	0	0	0	0	0	NA	NA	0	0	0	0	65.4	34.8	0	0	0	0	NA	FALSE	FALSE
"1"	100897714	100897799	"-"	"ENSRNOG00000026243_004i"	"ENSRNOG00000026243"	"Ap2a1"	85	1	0	0	0	3	0	0	0	0	1	2	0	35	54	55	143	218	13	20	19	59	82	334	2	0	0	0	0	0	0	0	0	0	0	0	0	1	0	0	0	3	0	0	0	0	1	2	0	0	0	NA	NA	0.8	0.2	0.00941176470588235	0.00235294117647059	101	38.6	0	0	0.8	0.2	-1.38629436111989	FALSE	FALSE
"1"	100897922	100898961	"-"	"ENSRNOG00000026243_005i"	"ENSRNOG00000026243"	"Ap2a1"	1039	10	1	12	22	34	5	0	0	0	1	10	1	16	9	8	0	6	0	9	0	0	0	128	7	0	0	1	0	0	0	0	0	0	0	1	0	1	0	0	0	0	0	0	0	0	0	0	0	0	0	NA	NA	15.8	1.2	0.0152069297401347	0.00115495668912416	7.8	1.8	0.2	0	0.2	0	-2.57768838323897	TRUE	FALSE
"1"	100899054	100899185	"-"	"ENSRNOG00000026243_006i"	"ENSRNOG00000026243"	"Ap2a1"	131	0	0	0	1	0	0	0	0	0	0	0	0	15	15	21	32	35	24	4	15	13	8	264	6	0	0	0	1	0	0	0	0	0	0	0	0	0	0	0	0	0	0	0	0	0	0	0	0	0	0	NA	NA	0.2	0	0.00152671755725191	0	23.6	12.8	0.2	0	0	0	-Inf	FALSE	FALSE
"1"	100899269	100899367	"-"	"ENSRNOG00000026243_007i"	"ENSRNOG00000026243"	"Ap2a1"	98	0	0	2	3	2	0	0	0	0	0	1	0	7	9	14	29	45	1	0	0	7	2	165	36	0	0	2	3	1	0	0	0	0	0	0	0	0	0	0	0	1	0	0	0	0	0	0	0	0	0	NA	NA	1.4	0	0.0142857142857143	0	20.8	2	1.2	0	0.2	0	-Inf	FALSE	FALSE
"1"	100899425	100899684	"-"	"ENSRNOG00000026243_008i"	"ENSRNOG00000026243"	"Ap2a1"	259	0	0	9	12	6	0	0	6	3	0	12	0	1	15	8	9	11	0	2	3	2	3	144	8	0	0	0	1	2	0	0	0	0	0	0	0	0	0	0	0	0	0	0	0	3	0	1	0	0	0	NA	NA	5.4	1.8	0.0208494208494209	0.00694980694980695	8.8	2	0.6	0	0	0.6	-1.09861228866811	FALSE	FALSE
"1"	100899751	100899967	"-"	"ENSRNOG00000026243_009i"	"ENSRNOG00000026243"	"Ap2a1"	216	0	2	5	17	33	4	0	0	0	0	6	0	21	33	43	48	61	8	9	19	22	30	175	23	0	1	1	6	15	0	0	0	0	0	0	0	0	0	2	0	3	4	0	0	0	0	0	0	0	0	NA	56	11.4	0.8	0.0527777777777778	0.0037037037037037	41.2	17.6	4.6	0	1	0.8	-2.65675690671466	FALSE	FALSE
"1"	100900129	100900215	"-"	"ENSRNOG00000026243_010i"	"ENSRNOG00000026243"	"Ap2a1"	86	2	0	1	2	6	0	0	0	0	0	5	0	48	73	72	251	312	39	23	24	92	105	46	7	2	0	0	0	3	0	0	0	0	0	0	0	0	0	1	2	3	0	0	0	0	0	4	0	0	0	NA	NA	2.2	0	0.0255813953488372	0	151.2	56.6	1	0	1.2	0	-Inf	FALSE	FALSE
"1"	100900384	100900463	"-"	"ENSRNOG00000026243_011i"	"ENSRNOG00000026243"	"Ap2a1"	79	11	2	3	8	14	0	0	4	0	0	4	0	7	7	26	36	38	4	17	2	18	6	197	5	11	0	2	6	11	0	0	4	0	0	1	0	8	2	1	5	4	0	0	0	0	0	3	0	0	0	NA	NA	7.6	0.8	0.0962025316455696	0.010126582278481	22.8	9.4	6	0.8	4	0	-2.25129179860649	TRUE	FALSE
"1"	100900696	100900828	"-"	"ENSRNOG00000026243_012i"	"ENSRNOG00000026243"	"Ap2a1"	132	3	0	3	9	6	0	0	0	0	0	4	0	16	34	16	29	26	3	7	3	19	11	325	6	1	0	1	0	1	0	0	0	0	0	0	0	2	0	2	8	2	0	0	0	0	0	4	0	0	0	NA	NA	4.2	0	0.0318181818181818	0	24.2	8.6	0.6	0	2.8	0	-Inf	FALSE	FALSE
"1"	100900927	100901867	"-"	"ENSRNOG00000026243_013i"	"ENSRNOG00000026243"	"Ap2a1"	940	0	8	4	11	18	0	0	6	5	0	1	0	18	16	28	10	6	10	5	3	1	7	176	7	0	0	2	0	1	0	0	0	3	0	0	0	0	0	0	1	0	0	0	0	0	0	0	0	0	0	NA	NA	8.2	2.2	0.00872340425531915	0.00234042553191489	15.6	5.2	0.6	0.6	0.2	0	-1.31567679390594	FALSE	FALSE
"1"	100902051	100902349	"-"	"ENSRNOG00000026243_014i"	"ENSRNOG00000026243"	"Ap2a1"	298	0	1	0	0	0	0	0	0	0	1	0	0	21	11	23	16	17	3	0	5	0	5	198	3	0	0	0	0	0	0	0	0	0	0	0	0	0	0	0	0	0	0	0	0	0	1	0	0	0	0	NA	NA	0.2	0.2	0.000671140939597316	0.000671140939597316	17.6	2.6	0	0	0	0.2	0	FALSE	FALSE
"1"	100902488	100902582	"-"	"ENSRNOG00000026243_015i"	"ENSRNOG00000026243"	"Ap2a1"	94	3	0	0	3	1	0	0	0	0	0	1	0	15	4	13	10	11	2	0	9	0	1	233	33	3	0	0	2	1	0	0	0	0	0	0	0	0	0	0	1	0	0	0	0	0	0	0	0	0	0	NA	NA	1.4	0	0.0148936170212766	0	10.6	2.4	1.2	0	0.2	0	-Inf	FALSE	FALSE
"1"	100902752	100903076	"-"	"ENSRNOG00000026243_016i"	"ENSRNOG00000026243"	"Ap2a1"	324	0	0	1	3	0	0	0	0	0	0	2	0	33	39	43	20	34	14	27	11	1	16	395	36	0	0	0	0	0	0	0	0	0	0	0	0	0	0	0	1	0	0	0	0	0	0	0	0	0	0	NA	NA	0.8	0	0.00246913580246914	0	33.8	13.8	0	0	0.2	0	-Inf	FALSE	FALSE
"1"	100903228	100903849	"-"	"ENSRNOG00000026243_017i"	"ENSRNOG00000026243"	"Ap2a1"	621	5	1	5	3	14	0	0	0	0	0	0	0	55	55	58	54	73	2	12	9	25	12	194	15	1	0	0	0	2	0	0	0	0	0	0	0	0	0	0	0	2	0	0	0	0	0	0	0	0	0	NA	NA	5.6	0	0.00901771336553945	0	59	12	0.6	0	0.4	0	-Inf	TRUE	FALSE
"1"	100903959	100905550	"-"	"ENSRNOG00000026243_018i"	"ENSRNOG00000026243"	"Ap2a1"	1591	8	5	6	44	26	0	1	0	2	1	1	0	53	100	85	28	50	27	20	18	11	1	108	1	0	0	0	9	3	0	0	0	0	0	0	0	0	0	0	8	11	0	0	0	0	0	0	0	0	0	NA	NA	17.8	0.8	0.0111879321181647	0.000502828409805154	63.2	15.4	2.4	0	3.8	0	-3.10234200861225	TRUE	FALSE
"1"	100905653	100906030	"-"	"ENSRNOG00000026243_019i"	"ENSRNOG00000026243"	"Ap2a1"	377	2	7	0	4	14	0	0	0	0	4	0	0	9	23	18	14	18	6	9	5	9	4	191	11	0	0	0	0	4	0	0	0	0	0	0	0	2	0	0	0	0	0	0	0	0	0	0	0	0	0	NA	NA	5.4	0.8	0.0143236074270557	0.00212201591511936	16.4	6.6	0.8	0	0.4	0	-1.90954250488444	FALSE	FALSE
"1"	100906161	100913424	"-"	"ENSRNOG00000026243_020i"	"ENSRNOG00000026243"	"Ap2a1"	7263	27	27	20	139	129	0	0	4	3	4	46	0	6	31	16	3	6	9	16	10	3	3	187	8	0	0	0	2	2	0	0	0	0	0	1	0	0	0	0	2	1	0	0	0	0	0	0	0	0	0	NA	NA	68.4	2.2	0.00941759603469641	0.00030290513561889	12.4	8.2	0.8	0	0.6	0	-3.43691546426423	TRUE	FALSE
"1"	100913619	100913776	"-"	"ENSRNOG00000026243_021i"	"ENSRNOG00000026243"	"Ap2a1"	157	0	0	0	0	2	0	0	0	0	0	1	0	47	79	75	10	43	47	30	11	4	7	173	16	0	0	0	0	0	0	0	0	0	0	0	0	0	0	0	0	2	0	0	0	0	0	0	0	0	0	NA	NA	0.4	0	0.00254777070063694	0	50.8	19.8	0	0	0.4	0	-Inf	FALSE	FALSE
"1"	100913920	100914013	"-"	"ENSRNOG00000026243_022i"	"ENSRNOG00000026243"	"Ap2a1"	93	1	0	2	0	1	0	0	0	0	0	0	0	16	22	6	20	40	2	18	0	21	2	79	19	0	0	2	0	0	0	0	0	0	0	0	0	0	0	0	0	1	0	0	0	0	0	0	0	0	0	NA	NA	0.8	0	0.00860215053763441	0	20.8	8.6	0.4	0	0.2	0	-Inf	FALSE	FALSE
"1"	100914083	100926268	"-"	"ENSRNOG00000026243_023i"	"ENSRNOG00000026243"	"Ap2a1"	12185	98	128	142	228	240	14	2	4	3	7	217	1	18	28	41	22	27	7	14	17	13	1	133	29	0	0	0	0	1	0	0	0	0	0	3	0	1	0	4	3	1	0	0	0	0	0	0	0	0	0	NA	NA	167.2	6	0.0137217890849405	0.000492408699220353	27.2	10.4	0.2	0	1.8	0	-3.32743123142255	TRUE	FALSE
"1"	100940062	100940388	"+"	"ENSRNOG00000020443_001i"	"ENSRNOG00000020443"	"Tsks"	326	0	0	0	0	0	0	0	0	0	0	0	0	0	3	0	0	0	0	0	0	0	0	0	0	0	0	0	0	0	0	0	0	0	0	0	0	0	0	0	0	0	0	0	0	0	0	0	0	0	0	NA	NA	0	0	0	0	0.6	0	0	0	0	0	NA	FALSE	FALSE
"1"	100940612	100946744	"+"	"ENSRNOG00000020443_002i"	"ENSRNOG00000020443"	"Tsks"	6132	0	0	0	0	0	0	0	0	0	15	0	0	0	0	0	0	0	0	0	0	0	0	0	0	0	0	0	0	0	0	0	0	0	0	0	0	0	0	0	0	0	0	0	0	0	0	0	0	0	0	NA	NA	0	3	0	0.000489236790606654	0	0	0	0	0	0	Inf	FALSE	FALSE
"1"	100946841	100947003	"+"	"ENSRNOG00000020443_003i"	"ENSRNOG00000020443"	"Tsks"	162	0	0	0	0	0	0	0	0	0	0	0	0	0	0	0	0	0	0	0	0	0	0	0	0	0	0	0	0	0	0	0	0	0	0	0	0	0	0	0	0	0	0	0	0	0	0	0	0	0	0	NA	NA	0	0	0	0	0	0	0	0	0	0	NA	FALSE	FALSE
"1"	100947088	100948045	"+"	"ENSRNOG00000020443_004i"	"ENSRNOG00000020443"	"Tsks"	957	0	0	0	0	0	0	0	0	0	0	0	0	0	0	0	0	0	0	0	0	0	0	0	0	0	0	0	0	0	0	0	0	0	0	0	0	0	0	0	0	0	0	0	0	0	0	0	0	0	0	NA	NA	0	0	0	0	0	0	0	0	0	0	NA	FALSE	FALSE
"1"	100948130	100948727	"+"	"ENSRNOG00000020443_005i"	"ENSRNOG00000020443"	"Tsks"	597	0	0	0	0	0	0	0	0	0	0	0	0	0	0	0	0	0	0	0	0	0	0	0	0	0	0	0	0	0	0	0	0	0	0	0	0	0	0	0	0	0	0	0	0	0	0	0	0	0	0	NA	NA	0	0	0	0	0	0	0	0	0	0	NA	FALSE	FALSE
"1"	100949015	100950030	"+"	"ENSRNOG00000020443_006i"	"ENSRNOG00000020443"	"Tsks"	1015	0	2	0	0	1	0	0	0	0	0	1	0	0	0	0	0	0	0	0	0	0	0	0	0	0	0	0	0	0	0	0	0	0	0	0	0	0	0	0	0	0	0	0	0	0	0	0	0	0	0	NA	NA	0.6	0	0.000591133004926108	0	0	0	0	0	0	0	-Inf	FALSE	FALSE
"1"	100950226	100950606	"+"	"ENSRNOG00000020443_007i"	"ENSRNOG00000020443"	"Tsks"	380	0	0	0	0	0	0	0	0	0	0	0	0	0	0	0	0	0	0	0	0	0	0	1	0	0	0	0	0	0	0	0	0	0	0	0	0	0	0	0	0	0	0	0	0	0	0	0	0	0	0	NA	NA	0	0	0	0	0	0	0	0	0	0	NA	FALSE	FALSE
"1"	100950781	100952412	"+"	"ENSRNOG00000020443_008i"	"ENSRNOG00000020443"	"Tsks"	1631	0	0	0	0	0	0	0	0	0	0	2	0	0	0	1	0	0	0	0	0	0	0	0	0	0	0	0	0	0	0	0	0	0	0	0	0	0	0	0	0	0	0	0	0	0	0	0	0	0	0	NA	NA	0	0	0	0	0.2	0	0	0	0	0	NA	FALSE	FALSE
"1"	100952549	100953504	"+"	"ENSRNOG00000020443_009i"	"ENSRNOG00000020443"	"Tsks"	955	0	0	0	0	0	0	0	0	0	0	3	0	0	0	0	0	0	0	0	0	0	0	1	0	0	0	0	0	0	0	0	0	0	0	0	0	0	0	0	0	0	0	0	0	0	0	0	0	0	0	NA	NA	0	0	0	0	0	0	0	0	0	0	NA	FALSE	FALSE
"1"	100953630	100953764	"+"	"ENSRNOG00000020443_010i"	"ENSRNOG00000020443"	"Tsks"	134	0	0	0	0	0	0	0	0	0	0	0	0	0	0	0	0	0	0	0	0	0	0	0	0	0	0	0	0	0	0	0	0	0	0	0	0	0	0	0	0	0	0	0	0	0	0	0	0	0	0	NA	NA	0	0	0	0	0	0	0	0	0	0	NA	FALSE	FALSE
"1"	100955404	100955543	"-"	"ENSRNOG00000026163_001i"	"ENSRNOG00000026163"	"Cpt1c"	139	0	0	1	0	3	0	0	0	0	0	2	0	7	5	1	3	7	0	0	3	0	7	75	0	0	0	1	0	2	0	0	0	0	0	2	0	0	0	0	0	0	0	0	0	0	0	0	0	0	0	NA	NA	0.8	0	0.00575539568345324	0	4.6	2	0.6	0	0	0	-Inf	FALSE	FALSE
"1"	100955637	100955753	"-"	"ENSRNOG00000026163_002i"	"ENSRNOG00000026163"	"Cpt1c"	116	0	0	0	1	0	0	0	0	0	0	0	0	14	17	17	17	8	0	3	5	1	1	26	0	0	0	0	0	0	0	0	0	0	0	0	0	0	0	0	1	0	0	0	0	0	0	0	0	0	0	NA	NA	0.2	0	0.00172413793103448	0	14.6	2	0	0	0.2	0	-Inf	FALSE	FALSE
"1"	100955868	100956379	"-"	"ENSRNOG00000026163_003i"	"ENSRNOG00000026163"	"Cpt1c"	511	0	0	0	0	2	0	0	0	0	0	0	0	15	23	7	13	20	3	5	3	4	6	46	2	0	0	0	0	0	0	0	0	0	0	0	0	0	0	0	0	1	0	0	0	0	0	0	0	0	0	NA	NA	0.4	0	0.000782778864970646	0	15.6	4.2	0	0	0.2	0	-Inf	FALSE	FALSE
"1"	100956533	100957118	"-"	"ENSRNOG00000026163_004i"	"ENSRNOG00000026163"	"Cpt1c"	585	3	9	3	27	38	0	5	0	7	2	18	0	1	7	4	8	6	0	0	4	0	0	106	1	0	0	0	0	0	0	0	0	0	0	0	0	0	0	0	0	1	0	4	0	0	0	3	0	0	0	NA	NA	16	2.8	0.0273504273504274	0.00478632478632479	5.2	0.8	0	0	0.2	0.8	-1.74296930505862	TRUE	FALSE
"1"	100957254	100957763	"-"	"ENSRNOG00000026163_005i"	"ENSRNOG00000026163"	"Cpt1c"	509	5	1	2	11	12	0	0	0	0	0	0	0	2	1	0	1	4	0	5	0	0	0	22	1	0	1	0	1	4	0	0	0	0	0	0	0	0	0	2	0	2	0	0	0	0	0	0	0	0	0	NA	NA	6.2	0	0.0121807465618861	0	1.6	1	1.2	0	0.8	0	-Inf	TRUE	FALSE
"1"	100957929	100958359	"-"	"ENSRNOG00000026163_006i"	"ENSRNOG00000026163"	"Cpt1c"	430	1	2	4	7	10	0	0	0	0	1	0	0	4	2	4	7	13	5	8	0	8	0	51	3	0	2	0	0	0	0	0	0	0	0	0	0	0	0	0	2	0	0	0	0	0	0	0	0	0	0	NA	NA	4.8	0.2	0.0111627906976744	0.000465116279069767	6	4.2	0.4	0	0.4	0	-3.17805383034795	TRUE	FALSE
"1"	100958477	100959514	"-"	"ENSRNOG00000026163_007i"	"ENSRNOG00000026163"	"Cpt1c"	1037	3	10	12	8	8	3	2	0	0	0	5	0	15	34	16	41	69	3	2	6	27	7	31	1	0	0	0	0	1	0	0	0	0	0	0	0	0	1	0	1	5	3	0	0	0	0	1	0	0	0	NA	NA	8.2	1	0.00790742526518804	0.000964320154291225	35	9	0.2	0	1.4	0.6	-2.10413415427021	TRUE	FALSE
"1"	100959621	100960318	"-"	"ENSRNOG00000026163_008i"	"ENSRNOG00000026163"	"Cpt1c"	697	3	4	5	3	18	0	0	2	0	2	0	0	4	25	6	4	5	4	1	2	3	0	61	3	0	1	0	2	6	0	0	2	0	1	0	0	0	0	0	0	0	0	0	0	0	0	0	0	0	0	NA	NA	6.6	0.8	0.00946915351506456	0.00114777618364419	8.8	2	1.8	0.6	0	0	-2.11021320034659	TRUE	FALSE
"1"	100960502	100960606	"-"	"ENSRNOG00000026163_009i"	"ENSRNOG00000026163"	"Cpt1c"	104	0	2	0	0	0	0	0	0	0	0	0	0	2	2	4	2	1	0	9	0	3	0	88	0	0	0	0	0	0	0	0	0	0	0	0	0	0	2	0	0	0	0	0	0	0	0	0	0	0	0	NA	NA	0.4	0	0.00384615384615385	0	2.2	2.4	0	0	0.4	0	-Inf	FALSE	FALSE
"1"	100960803	100961364	"-"	"ENSRNOG00000026163_010i"	"ENSRNOG00000026163"	"Cpt1c"	561	15	1	8	31	57	0	0	0	0	0	6	0	5	16	10	10	9	12	0	4	4	0	40	0	0	0	4	3	3	0	0	0	0	0	0	0	4	0	0	2	3	0	0	0	0	0	1	0	0	0	NA	NA	22.4	0	0.0399286987522282	0	10	4	2	0	1.8	0	-Inf	TRUE	FALSE
"1"	100961450	100961535	"-"	"ENSRNOG00000026163_011i"	"ENSRNOG00000026163"	"Cpt1c"	85	2	4	9	4	4	0	0	0	0	0	10	0	16	35	25	24	15	5	24	5	6	12	25	4	1	4	6	0	1	0	0	0	0	0	4	0	2	1	9	4	3	0	0	0	0	0	1	0	0	0	NA	NA	4.6	0	0.0541176470588235	0	23	10.4	2.4	0	3.8	0	-Inf	TRUE	FALSE
"1"	100961644	100961790	"-"	"ENSRNOG00000026163_012i"	"ENSRNOG00000026163"	"Cpt1c"	146	10	11	3	16	21	0	6	0	0	0	9	0	19	16	15	6	14	4	12	11	0	1	44	0	0	5	0	5	7	0	0	0	0	0	4	0	7	6	3	5	5	0	0	0	0	0	3	0	0	0	NA	NA	12.2	1.2	0.0835616438356164	0.00821917808219178	14	5.6	3.4	0	5.2	0	-2.31911439494526	TRUE	FALSE
"1"	100961866	100964413	"-"	"ENSRNOG00000026163_013i"	"ENSRNOG00000026163"	"Cpt1c"	2547	78	65	43	96	145	0	3	1	6	4	119	0	37	33	21	9	7	10	3	13	5	0	43	0	7	10	10	12	23	0	0	0	3	2	10	0	6	1	8	7	2	0	0	0	0	0	2	0	0	0	NA	NA	85.4	2.8	0.0335296427169219	0.0010993325480958	21.4	6.2	12.4	1	4.8	0	-3.41772668361337	TRUE	FALSE
"1"	100964552	100964626	"-"	"ENSRNOG00000026163_014i"	"ENSRNOG00000026163"	"Cpt1c"	74	0	0	0	2	1	0	0	0	0	0	0	0	4	7	1	1	4	0	0	0	0	0	28	1	0	0	0	2	0	0	0	0	0	0	0	0	0	0	0	0	0	0	0	0	0	0	0	0	0	0	NA	NA	0.6	0	0.00810810810810811	0	3.4	0	0.4	0	0	0	-Inf	FALSE	FALSE
"1"	100964729	100965233	"-"	"ENSRNOG00000026163_015i"	"ENSRNOG00000026163"	"Cpt1c"	504	1	5	1	34	43	0	0	0	0	0	0	0	2	14	10	18	21	0	0	0	2	0	92	2	0	0	0	1	1	0	0	0	0	0	0	0	0	0	0	0	0	0	0	0	0	0	0	0	0	0	NA	NA	16.8	0	0.0333333333333333	0	13	0.4	0.4	0	0	0	-Inf	TRUE	FALSE
"1"	100965406	100967766	"-"	"ENSRNOG00000026163_016i"	"ENSRNOG00000026163"	"Cpt1c"	2360	11	15	10	9	19	0	0	0	1	0	4	0	5	11	7	4	21	9	0	0	1	1	63	6	0	0	3	0	0	0	0	0	0	0	0	0	0	4	1	0	0	0	0	0	0	0	0	0	0	0	NA	NA	12.8	0.2	0.00542372881355932	8.47457627118644e-05	9.6	2.2	0.6	0	1	0	-4.15888308335967	TRUE	FALSE
"1"	100967907	100968530	"-"	"ENSRNOG00000026163_017i"	"ENSRNOG00000026163"	"Cpt1c"	623	14	7	7	18	23	0	0	0	3	1	1	1	17	22	8	19	16	4	0	4	8	9	26	1	5	1	0	1	3	0	0	0	0	0	0	0	0	1	0	1	0	0	0	0	0	0	0	0	0	0	NA	NA	13.8	0.8	0.0221508828250401	0.00128410914927769	16.4	5	2	0	0.4	0	-2.84781214347737	TRUE	FALSE
"1"	100968686	100969376	"-"	"ENSRNOG00000026163_018i"	"ENSRNOG00000026163"	"Cpt1c"	690	6	7	4	21	22	0	7	0	0	1	2	1	2	7	3	2	2	6	13	0	5	11	24	1	0	0	0	0	0	0	0	0	0	0	0	0	0	0	0	1	0	0	0	0	0	0	0	0	0	0	NA	NA	12	1.6	0.0173913043478261	0.00231884057971014	3.2	7	0	0	0.2	0	-2.01490302054226	TRUE	FALSE
"1"	100971357	100971776	"-"	"ENSRNOG00000026109_001i"	"ENSRNOG00000026109"	"Prmt1"	419	0	1	0	1	5	0	0	0	0	0	2	0	31	25	16	32	33	19	40	4	5	23	248	44	0	0	0	0	2	0	0	0	0	0	0	0	0	0	0	0	0	0	0	0	0	0	0	0	0	0	NA	NA	1.4	0	0.00334128878281623	0	27.4	18.2	0.4	0	0	0	-Inf	FALSE	FALSE
"1"	100971899	100972387	"-"	"ENSRNOG00000026109_002i"	"ENSRNOG00000026109"	"Prmt1"	488	4	7	7	5	9	0	0	0	0	0	7	0	44	41	36	10	16	6	25	13	8	13	285	10	1	1	0	0	0	0	0	0	0	0	0	0	1	0	7	5	5	0	0	0	0	0	4	0	0	0	NA	NA	6.4	0	0.0131147540983607	0	29.4	13	0.4	0	3.6	0	-Inf	TRUE	FALSE
"1"	100972539	100973420	"-"	"ENSRNOG00000026109_003i"	"ENSRNOG00000026109"	"Prmt1"	881	3	4	6	5	4	0	0	0	0	0	30	0	45	49	41	37	35	29	17	3	7	21	236	17	0	0	0	0	1	0	0	0	0	0	1	0	0	0	0	0	0	0	0	0	0	0	1	0	0	0	NA	NA	4.4	0	0.00499432463110102	0	41.4	15.4	0.2	0	0	0	-Inf	FALSE	FALSE
"1"	100973537	100973627	"-"	"ENSRNOG00000026109_004i"	"ENSRNOG00000026109"	"Prmt1"	90	0	0	0	0	0	0	0	0	0	0	4	0	29	33	14	25	23	5	12	3	0	0	415	19	0	0	0	0	0	0	0	0	0	0	4	0	0	0	0	0	0	0	0	0	0	0	0	0	0	0	NA	NA	0	0	0	0	24.8	4	0	0	0	0	NA	FALSE	FALSE
"1"	100973716	100974157	"-"	"ENSRNOG00000026109_005i"	"ENSRNOG00000026109"	"Prmt1"	441	1	0	0	1	5	0	0	0	0	0	3	0	32	74	52	32	38	17	31	13	10	11	235	9	1	0	0	1	0	0	0	0	0	0	0	0	0	0	0	0	0	0	0	0	0	0	0	0	0	0	NA	NA	1.4	0	0.00317460317460317	0	45.6	16.4	0.4	0	0	0	-Inf	FALSE	FALSE
"1"	100974301	100976079	"-"	"ENSRNOG00000026109_006i"	"ENSRNOG00000026109"	"Prmt1"	1778	16	18	16	16	13	0	0	0	0	0	5	0	10	13	5	14	10	19	10	4	0	2	273	40	3	0	0	0	0	0	0	0	0	0	0	0	2	0	0	3	1	0	0	0	0	0	1	0	0	0	NA	NA	15.8	0	0.00888638920134983	0	10.4	7	0.6	0	1.2	0	-Inf	TRUE	FALSE
"1"	100976144	100976237	"-"	"ENSRNOG00000026109_007i"	"ENSRNOG00000026109"	"Prmt1"	93	4	0	0	1	1	0	0	0	0	0	0	0	41	75	58	41	46	19	37	12	13	35	95	16	1	0	0	0	1	0	0	0	0	0	0	0	3	0	0	1	0	0	0	0	0	0	0	0	0	0	NA	NA	1.2	0	0.0129032258064516	0	52.2	23.2	0.4	0	0.8	0	-Inf	FALSE	FALSE
"1"	100976394	100977649	"-"	"ENSRNOG00000026109_008i"	"ENSRNOG00000026109"	"Prmt1"	1255	8	12	3	9	14	0	0	0	0	0	11	0	7	14	32	1	5	23	10	6	1	8	300	27	0	0	0	0	0	0	0	0	0	0	0	0	4	0	0	0	0	0	0	0	0	0	0	0	0	0	NA	NA	9.2	0	0.00733067729083665	0	11.8	9.6	0	0	0.8	0	-Inf	TRUE	FALSE
"1"	100977752	100980304	"-"	"ENSRNOG00000026109_009i"	"ENSRNOG00000026109"	"Prmt1"	2552	15	40	20	68	55	18	12	20	60	18	115	28	0	1	0	0	0	0	0	2	0	0	100	4	0	0	0	0	0	0	0	0	0	0	1	0	0	1	0	0	0	0	0	0	0	0	0	0	0	0	NA	NA	39.6	25.6	0.0155172413793103	0.0100313479623824	0.2	0.4	0	0	0.2	0	-0.436236766774918	TRUE	TRUE
"1"	100985249	100986699	"-"	"ENSRNOG00000020486_001i"	"ENSRNOG00000020486"	"Bcl2l12"	1450	0	0	3	0	8	8	0	0	0	0	13	0	1	3	0	0	0	0	1	0	0	0	0	0	0	0	3	0	0	0	0	0	0	0	1	0	0	0	0	0	1	0	0	0	0	0	0	0	0	0	NA	NA	2.2	1.6	0.00151724137931034	0.00110344827586207	0.8	0.2	0.6	0	0.2	0	-0.318453731118535	FALSE	FALSE
"1"	100986988	100988099	"-"	"ENSRNOG00000020486_002i"	"ENSRNOG00000020486"	"Bcl2l12"	1111	2	2	0	7	4	0	0	0	1	0	19	1	0	0	0	1	0	4	1	0	0	0	1	0	0	0	0	0	0	0	0	0	0	0	0	0	0	0	0	2	0	0	0	0	1	0	1	1	0	0	NA	NA	3	0.2	0.0027002700270027	0.00018001800180018	0.2	1	0	0	0.4	0.2	-2.70805020110221	FALSE	FALSE
"1"	100988192	100988284	"-"	"ENSRNOG00000020486_003i"	"ENSRNOG00000020486"	"Bcl2l12"	92	0	2	1	0	0	0	0	0	0	0	0	0	0	1	0	0	0	12	3	0	0	0	1	0	0	2	1	0	0	0	0	0	0	0	0	0	0	2	1	0	0	0	0	0	0	0	0	0	0	0	NA	NA	0.6	0	0.00652173913043478	0	0.2	3	0.6	0	0.6	0	-Inf	FALSE	FALSE
"1"	100988372	100991053	"-"	"ENSRNOG00000020486_004i"	"ENSRNOG00000020486"	"Bcl2l12"	2681	4	1	0	9	4	0	0	0	0	0	2	0	1	3	0	0	1	4	7	0	0	0	4	0	0	0	0	0	0	0	0	0	0	0	0	0	0	0	0	0	0	0	0	0	0	0	0	0	0	0	NA	NA	3.6	0	0.00134278254382693	0	1	2.2	0	0	0	0	-Inf	FALSE	FALSE
"1"	100991197	100991380	"-"	"ENSRNOG00000020486_005i"	"ENSRNOG00000020486"	"Bcl2l12"	183	5	1	0	0	3	0	0	0	0	0	0	0	7	4	0	13	7	0	2	0	0	0	9	0	3	0	0	0	2	0	0	0	0	0	0	0	2	1	0	0	1	0	0	0	0	0	0	0	0	0	NA	NA	1.8	0	0.00983606557377049	0	6.2	0.4	1	0	0.8	0	-Inf	FALSE	FALSE
"1"	100991496	100992061	"-"	"ENSRNOG00000020486_006i"	"ENSRNOG00000020486"	"Bcl2l12"	565	0	0	0	3	0	0	0	0	0	0	17	0	0	0	0	0	0	0	0	0	0	0	2	0	0	0	0	0	0	0	0	0	0	0	0	0	0	0	0	0	0	0	0	0	0	0	1	0	0	0	NA	NA	0.6	0	0.00106194690265487	0	0	0	0	0	0	0	-Inf	FALSE	FALSE
"1"	100992243	100993182	"-"	"ENSRNOG00000020486_007i"	"ENSRNOG00000020486"	"Bcl2l12"	939	0	0	0	0	2	0	0	0	0	1	0	0	0	0	0	0	0	0	0	0	0	0	0	0	0	0	0	0	0	0	0	0	0	0	0	0	0	0	0	0	0	0	0	0	0	0	0	0	0	0	NA	NA	0.4	0.2	0.000425985090521832	0.000212992545260916	0	0	0	0	0	0	-0.693147180559945	FALSE	FALSE
"1"	100992507	100993235	"+"	"ENSRNOG00000043388_001i"	"ENSRNOG00000043388"	"Irf3"	728	14	9	27	13	16	7	0	0	0	6	33	3	3	7	4	5	2	7	3	0	0	0	7	0	3	2	12	4	3	0	0	0	0	1	1	0	0	0	4	0	0	0	0	0	0	0	0	0	0	0	NA	NA	15.8	2.6	0.0217032967032967	0.00357142857142857	4.2	2	4.8	0.2	0.8	0	-1.80449849500548	TRUE	FALSE
"1"	100993435	100994593	"+"	"ENSRNOG00000043388_002i"	"ENSRNOG00000043388"	"Irf3"	1158	1	0	8	0	4	3	0	0	0	0	28	1	7	7	0	1	0	0	0	0	0	0	14	0	0	0	0	0	0	0	0	0	0	0	0	0	0	0	0	0	0	0	0	0	0	0	0	0	0	0	NA	NA	2.6	0.6	0.00224525043177893	0.000518134715025907	3	0	0	0	0	0	-1.46633706879343	FALSE	FALSE
"1"	100994766	100994856	"+"	"ENSRNOG00000043388_003i"	"ENSRNOG00000043388"	"Irf3"	90	0	0	4	1	2	0	0	0	0	0	0	0	6	11	6	15	8	0	0	0	1	0	26	0	0	0	1	0	0	0	0	0	0	0	0	0	0	0	3	1	2	0	0	0	0	0	0	0	0	0	NA	NA	1.4	0	0.0155555555555556	0	9.2	0.2	0.2	0	1.2	0	-Inf	FALSE	FALSE
"1"	100994931	100995081	"+"	"ENSRNOG00000043388_004i"	"ENSRNOG00000043388"	"Irf3"	150	4	9	7	12	24	0	0	0	2	0	2	0	7	6	20	7	1	0	3	2	0	0	13	0	1	4	5	6	11	0	0	0	0	0	0	0	3	4	2	5	11	0	0	0	2	0	0	0	0	0	NA	NA	11.2	0.4	0.0746666666666667	0.00266666666666667	8.2	1	5.4	0	5	0.4	-3.3322045101752	TRUE	FALSE
"1"	100995257	100995359	"+"	"ENSRNOG00000043388_005i"	"ENSRNOG00000043388"	"Irf3"	102	2	2	0	31	34	0	0	0	0	0	4	0	0	4	9	0	0	0	0	0	0	0	12	1	2	0	0	31	33	0	0	0	0	0	0	0	0	2	0	0	1	0	0	0	0	0	3	0	0	0	NA	NA	13.8	0	0.135294117647059	0	2.6	0	13.2	0	0.6	0	-Inf	FALSE	FALSE
"1"	100995741	100996479	"+"	"ENSRNOG00000043388_006i"	"ENSRNOG00000043388"	"Irf3"	738	22	30	26	68	75	4	0	0	10	0	101	0	0	0	0	0	2	0	0	0	0	1	7	1	1	2	5	2	1	0	0	0	0	0	4	0	3	2	1	6	8	0	0	0	0	0	2	0	0	0	NA	NA	44.2	2.8	0.0598915989159892	0.0037940379403794	0.4	0.2	2.2	0	4	0	-2.75910537190249	TRUE	FALSE
"1"	100996596	100996973	"+"	"ENSRNOG00000043388_007i"	"ENSRNOG00000043388"	"Irf3"	377	0	0	0	1	2	0	0	0	0	0	0	0	3	6	5	0	5	0	0	0	2	1	16	0	0	0	0	0	2	0	0	0	0	0	0	0	0	0	0	0	0	0	0	0	0	0	0	0	0	0	NA	NA	0.6	0	0.00159151193633952	0	3.8	0.6	0.4	0	0	0	-Inf	FALSE	FALSE
"1"	100998134	100998252	"-"	"ENSRNOG00000056946_001i"	"ENSRNOG00000056946"	"Scaf1"	118	0	0	0	0	2	0	0	0	0	0	8	0	1	2	6	5	2	5	0	0	5	1	153	0	0	0	0	0	0	0	0	0	0	0	2	0	0	0	0	0	2	0	0	0	0	0	1	0	0	0	NA	NA	0.4	0	0.00338983050847458	0	3.2	2.2	0	0	0.4	0	-Inf	FALSE	FALSE
"1"	100998382	100999830	"-"	"ENSRNOG00000056946_002i"	"ENSRNOG00000056946"	"Scaf1"	1448	20	26	20	15	23	0	0	0	1	2	3	0	4	7	14	7	23	9	4	4	14	15	66	2	0	0	0	0	0	0	0	0	0	0	0	0	0	0	0	0	0	0	0	0	0	0	0	0	0	0	NA	NA	20.8	0.6	0.0143646408839779	0.000414364640883978	11	9.2	0	0	0	0	-3.54577861047326	TRUE	FALSE
"1"	101000050	101000266	"-"	"ENSRNOG00000056946_003i"	"ENSRNOG00000056946"	"Scaf1"	216	5	0	5	6	6	0	0	0	0	0	4	0	25	33	16	79	136	11	32	12	119	135	263	5	2	0	1	1	2	0	0	0	0	0	1	0	0	0	0	5	4	0	0	0	0	0	0	0	0	0	NA	NA	4.4	0	0.0203703703703704	0	57.8	61.8	1.2	0	1.8	0	-Inf	FALSE	FALSE
"1"	101000350	101000769	"-"	"ENSRNOG00000056946_004i"	"ENSRNOG00000056946"	"Scaf1"	419	8	4	1	4	5	0	1	0	0	0	0	0	13	12	17	18	29	5	8	7	17	21	195	3	0	0	0	0	0	0	0	0	0	0	0	0	2	0	0	1	0	0	0	0	0	0	0	0	0	0	NA	NA	4.4	0.2	0.0105011933174224	0.000477326968973747	17.8	11.6	0	0	0.6	0	-3.09104245335832	TRUE	FALSE
"1"	101003443	101006776	"-"	"ENSRNOG00000056946_005i"	"ENSRNOG00000056946"	"Scaf1"	3333	17	50	24	125	158	4	0	0	19	14	81	1	10	17	18	24	29	18	8	8	26	18	82	0	2	0	1	0	0	0	0	0	0	0	0	0	1	7	3	7	14	1	0	0	2	0	4	0	0	0	NA	NA	74.8	7.4	0.0224422442244224	0.00222022202220222	19.6	15.6	0.6	0	6.4	0.6	-2.31333788477031	TRUE	FALSE
"1"	101006893	101006978	"-"	"ENSRNOG00000056946_006i"	"ENSRNOG00000056946"	"Scaf1"	85	0	1	2	0	1	0	0	0	0	3	0	0	7	12	8	19	27	10	9	5	51	16	87	6	0	1	0	0	1	0	0	0	0	0	0	0	0	0	2	0	0	0	0	0	0	3	0	0	0	0	NA	NA	0.8	0.6	0.00941176470588235	0.00705882352941176	14.6	18.2	0.4	0	0.4	0.6	-0.287682072451781	FALSE	FALSE
"1"	101007080	101007350	"-"	"ENSRNOG00000056946_007i"	"ENSRNOG00000056946"	"Scaf1"	270	6	10	6	7	4	6	9	11	7	5	1	1	0	2	8	14	28	7	9	7	12	15	103	0	0	5	1	0	0	0	0	0	0	0	0	0	1	0	1	2	0	0	0	0	0	0	0	0	0	0	NA	87	6.6	7.6	0.0244444444444444	0.0281481481481481	10.4	10	1.2	0	0.8	0	0.141078598259906	TRUE	TRUE
"1"	101007449	101007891	"-"	"ENSRNOG00000056946_008i"	"ENSRNOG00000056946"	"Scaf1"	442	0	4	0	3	5	0	0	0	0	0	0	0	4	7	6	6	6	0	10	10	19	18	13	6	0	0	0	0	3	0	0	0	0	0	0	0	0	0	0	0	1	0	0	0	0	0	0	0	0	0	NA	NA	2.4	0	0.00542986425339366	0	5.8	11.4	0.6	0	0.2	0	-Inf	FALSE	FALSE
"1"	101007950	101008154	"-"	"ENSRNOG00000056946_009i"	"ENSRNOG00000056946"	"Scaf1"	204	1	0	2	4	4	0	0	0	0	0	10	0	3	1	0	11	2	6	0	0	5	1	17	3	1	0	0	0	0	0	0	0	0	0	0	0	0	0	0	2	3	0	0	0	0	0	0	0	0	0	NA	NA	2.2	0	0.0107843137254902	0	3.4	2.4	0.2	0	1	0	-Inf	FALSE	FALSE
"1"	101012986	101015182	"+"	"ENSRNOG00000037247_001i"	"ENSRNOG00000037247"	"Rras"	2196	1	0	2	4	5	1	0	0	0	0	2	0	1	1	0	0	0	0	0	0	0	0	20	1	0	0	0	0	0	0	0	0	0	0	0	0	0	0	0	0	0	0	0	0	0	0	0	0	0	0	NA	NA	2.4	0.2	0.00109289617486339	9.10746812386157e-05	0.4	0	0	0	0	0	-2.484906649788	FALSE	FALSE
"1"	101015271	101015376	"+"	"ENSRNOG00000037247_002i"	"ENSRNOG00000037247"	"Rras"	105	0	0	0	0	2	0	0	0	0	0	0	0	0	1	0	0	0	0	2	0	0	0	26	1	0	0	0	0	0	0	0	0	0	0	0	0	0	0	0	0	2	0	0	0	0	0	0	0	0	0	NA	NA	0.4	0	0.00380952380952381	0	0.2	0.4	0	0	0.4	0	-Inf	FALSE	FALSE
"1"	101015480	101015565	"+"	"ENSRNOG00000037247_003i"	"ENSRNOG00000037247"	"Rras"	85	0	0	0	0	0	0	0	0	0	0	0	0	2	9	5	0	2	5	0	0	0	0	20	2	0	0	0	0	0	0	0	0	0	0	0	0	0	0	0	0	0	0	0	0	0	0	0	0	0	0	NA	NA	0	0	0	0	3.6	1	0	0	0	0	NA	FALSE	FALSE
"1"	101015675	101016161	"+"	"ENSRNOG00000037247_004i"	"ENSRNOG00000037247"	"Rras"	486	1	0	0	2	0	0	0	0	0	0	0	0	6	11	6	10	4	9	12	0	1	8	30	0	0	0	0	0	0	0	0	0	0	0	0	0	0	0	0	0	0	0	0	0	0	0	0	0	0	0	NA	NA	0.6	0	0.00123456790123457	0	7.4	6	0	0	0	0	-Inf	FALSE	FALSE
"1"	101016281	101016353	"+"	"ENSRNOG00000037247_005i"	"ENSRNOG00000037247"	"Rras"	72	0	3	0	0	0	0	0	0	0	0	6	0	13	25	9	10	5	10	1	1	0	6	18	1	0	3	0	0	0	0	0	0	0	0	0	0	0	3	0	0	0	0	0	0	0	0	0	0	0	0	NA	NA	0.6	0	0.00833333333333333	0	12.4	3.6	0.6	0	0.6	0	-Inf	FALSE	FALSE
"1"	101023436	101023571	"-"	"ENSRNOG00000059408_001i"	"ENSRNOG00000059408"	"Prr12"	135	4	0	0	0	6	0	0	0	0	0	24	1	0	2	0	0	0	0	2	0	1	0	3	0	4	0	0	0	2	0	0	0	0	0	0	0	0	0	0	0	0	0	0	0	0	0	0	0	0	0	NA	NA	2	0	0.0148148148148148	0	0.4	0.6	1.2	0	0	0	-Inf	FALSE	FALSE
"1"	101023668	101023749	"-"	"ENSRNOG00000059408_002i"	"ENSRNOG00000059408"	"Prr12"	81	0	0	0	5	0	0	0	0	0	0	48	0	0	1	3	5	0	0	0	8	2	1	30	0	0	0	0	5	0	0	0	0	0	0	0	0	0	0	0	0	0	0	0	0	0	0	0	0	0	0	NA	NA	1	0	0.0123456790123457	0	1.8	2.2	1	0	0	0	-Inf	FALSE	FALSE
"1"	101023897	101025431	"-"	"ENSRNOG00000059408_003i"	"ENSRNOG00000059408"	"Prr12"	1534	3	7	3	0	3	0	0	0	0	1	66	1	0	3	1	0	0	0	0	0	0	0	17	0	0	0	0	0	0	0	0	0	0	0	2	0	0	0	0	0	0	0	0	0	0	0	3	0	0	0	NA	NA	3.2	0.2	0.00208604954367666	0.000130378096479791	0.8	0	0	0	0	0	-2.77258872223978	FALSE	FALSE
"1"	101025530	101025796	"-"	"ENSRNOG00000059408_004i"	"ENSRNOG00000059408"	"Prr12"	266	0	0	2	0	0	0	0	0	0	0	23	0	4	0	0	5	5	0	0	0	0	0	3	0	0	0	0	0	0	0	0	0	0	0	7	0	0	0	2	0	0	0	0	0	0	0	0	0	0	0	NA	NA	0.4	0	0.00150375939849624	0	2.8	0	0	0	0.4	0	-Inf	FALSE	FALSE
"1"	101025923	101028249	"-"	"ENSRNOG00000059408_005i"	"ENSRNOG00000059408"	"Prr12"	2326	8	3	11	11	25	0	0	0	0	1	4	0	7	1	0	0	1	0	0	1	0	0	9	0	0	0	0	0	0	0	0	0	0	0	0	0	0	0	0	0	0	0	0	0	0	0	0	0	0	0	NA	NA	11.6	0.2	0.00498710232158212	8.59845227858985e-05	1.8	0.2	0	0	0	0	-4.06044301054642	FALSE	FALSE
"1"	101028732	101029081	"-"	"ENSRNOG00000059408_006i"	"ENSRNOG00000059408"	"Prr12"	349	0	0	0	0	0	0	0	0	0	0	11	0	2	13	7	9	12	22	38	13	33	40	2	0	0	0	0	0	0	0	0	0	0	0	0	0	0	0	0	0	0	0	0	0	0	0	0	0	0	0	NA	NA	0	0	0	0	8.6	29.2	0	0	0	0	NA	FALSE	FALSE
"1"	101029216	101029356	"-"	"ENSRNOG00000059408_007i"	"ENSRNOG00000059408"	"Prr12"	140	0	0	0	0	0	0	0	0	0	0	22	1	2	0	0	0	0	0	1	6	6	2	13	0	0	0	0	0	0	0	0	0	0	0	0	0	0	0	0	0	0	0	0	0	0	0	0	0	0	0	NA	NA	0	0	0	0	0.4	3	0	0	0	0	NA	FALSE	FALSE
"1"	101029474	101036794	"-"	"ENSRNOG00000059408_008i"	"ENSRNOG00000059408"	"Prr12"	7320	10	16	16	17	26	0	0	3	0	0	43	2	0	0	0	4	3	0	4	0	1	0	0	0	0	0	0	0	0	0	0	0	0	0	0	0	0	0	0	0	0	0	0	0	0	0	1	0	0	0	NA	NA	17	0.6	0.0023224043715847	8.19672131147541e-05	1.4	1	0	0	0	0	-3.34403896782221	FALSE	FALSE
"1"	101037220	101038600	"-"	"ENSRNOG00000059408_009i"	"ENSRNOG00000059408"	"Prr12"	1380	4	7	7	5	7	0	0	0	0	0	0	0	0	0	7	15	28	0	7	0	5	26	2	1	0	0	0	0	0	0	0	0	0	0	0	0	0	0	0	0	0	0	0	0	0	0	0	0	0	0	NA	NA	6	0	0.00434782608695652	0	10	7.6	0	0	0	0	-Inf	FALSE	FALSE
"1"	101039268	101039867	"-"	"ENSRNOG00000059408_010i"	"ENSRNOG00000059408"	"Prr12"	599	0	0	0	3	5	0	0	0	0	0	41	2	0	0	0	0	0	0	0	0	3	1	0	3	0	0	0	0	0	0	0	0	0	0	0	0	0	0	0	0	0	0	0	0	0	0	0	0	0	0	NA	NA	1.6	0	0.00267111853088481	0	0	0.8	0	0	0	0	-Inf	FALSE	FALSE
"1"	101043047	101043125	"-"	"ENSRNOG00000059408_011i"	"ENSRNOG00000059408"	"Prr12"	78	0	1	0	2	1	0	0	0	0	0	1	2	0	0	0	10	8	0	0	0	16	2	34	0	0	1	0	2	0	0	0	0	0	0	0	0	0	0	0	0	1	0	0	0	0	0	0	0	0	0	NA	NA	0.8	0	0.0102564102564103	0	3.6	3.6	0.6	0	0.2	0	-Inf	FALSE	FALSE
"1"	101043288	101044097	"-"	"ENSRNOG00000059408_012i"	"ENSRNOG00000059408"	"Prr12"	809	2	1	0	16	27	0	0	0	1	5	35	13	0	1	0	1	0	0	0	0	0	2	8	6	0	0	0	0	0	0	0	0	0	0	0	0	2	0	0	0	0	0	0	0	0	0	8	0	0	0	NA	NA	9.2	1.2	0.011372064276885	0.00148331273176761	0.4	0.4	0	0	0.4	0	-2.03688192726104	FALSE	FALSE
"1"	101044211	101045683	"-"	"ENSRNOG00000059408_013i"	"ENSRNOG00000059408"	"Prr12"	1472	0	0	3	21	39	0	0	0	1	0	2	7	3	2	2	6	6	0	16	0	12	0	20	0	0	0	0	0	0	0	0	0	0	0	0	0	0	0	1	5	8	0	0	0	0	0	0	0	0	0	NA	NA	12.6	0.2	0.00855978260869565	0.000135869565217391	3.8	5.6	0	0	2.8	0	-4.14313472639153	FALSE	FALSE
"1"	101047210	101047530	"-"	"ENSRNOG00000020517_001i"	"ENSRNOG00000020517"	"Prrg2"	320	0	0	0	0	0	0	0	0	0	0	0	1	0	0	0	0	1	0	0	0	0	0	0	0	0	0	0	0	0	0	0	0	0	0	0	0	0	0	0	0	0	0	0	0	0	0	0	0	0	0	NA	NA	0	0	0	0	0.2	0	0	0	0	0	NA	FALSE	FALSE
"1"	101047669	101049487	"-"	"ENSRNOG00000020517_003i"	"ENSRNOG00000020517"	"Prrg2"	1818	0	1	0	3	0	0	1	0	2	0	2	0	0	3	0	1	3	0	0	0	0	0	1	0	0	0	0	0	0	0	0	0	0	0	0	0	0	0	0	0	0	0	0	0	2	0	0	0	0	0	NA	NA	0.8	0.6	0.00044004400440044	0.00033003300330033	1.4	0	0	0	0	0.4	-0.287682072451781	FALSE	FALSE
"1"	101049630	101053261	"-"	"ENSRNOG00000020517_004i"	"ENSRNOG00000020517"	"Prrg2"	3631	7	1	0	0	1	0	0	0	0	0	4	0	0	0	0	1	0	0	0	0	0	0	0	2	0	0	0	0	0	0	0	0	0	0	0	0	0	0	0	0	0	0	0	0	0	0	1	0	0	0	NA	NA	1.8	0	0.0004957312035252	0	0.2	0	0	0	0	0	-Inf	FALSE	FALSE
"1"	101053302	101053493	"-"	"ENSRNOG00000020517_005i"	"ENSRNOG00000020517"	"Prrg2"	191	2	0	0	2	0	0	0	0	0	0	0	0	0	0	0	0	0	0	0	0	0	0	3	0	0	0	0	2	0	0	0	0	0	0	0	0	0	0	0	0	0	0	0	0	0	0	0	0	0	0	NA	NA	0.8	0	0.00418848167539267	0	0	0	0.4	0	0	0	-Inf	FALSE	FALSE
"1"	101053676	101053997	"-"	"ENSRNOG00000020517_006i"	"ENSRNOG00000020517"	"Prrg2"	321	0	3	0	0	0	0	0	0	0	0	0	0	0	0	0	0	0	0	0	0	0	0	0	0	0	1	0	0	0	0	0	0	0	0	0	0	0	0	0	0	0	0	0	0	0	0	0	0	0	0	NA	NA	0.6	0	0.00186915887850467	0	0	0	0.2	0	0	0	-Inf	FALSE	FALSE
"1"	101054152	101054728	"-"	"ENSRNOG00000020517_008i"	"ENSRNOG00000020517"	"Prrg2"	576	2	3	0	0	0	0	0	0	0	0	0	0	0	0	0	0	0	0	0	0	0	0	0	2	0	0	0	0	0	0	0	0	0	0	0	0	0	3	0	0	0	0	0	0	0	0	0	0	0	0	NA	NA	1	0	0.00173611111111111	0	0	0	0	0	0.6	0	-Inf	FALSE	FALSE
"1"	101055674	101066125	"+"	"ENSRNOG00000020543_001i"	"ENSRNOG00000020543"	"Nosip"	10451	43	40	38	59	81	0	0	0	0	3	49	1	6	0	0	0	0	0	0	0	0	0	24	1	0	0	0	0	0	0	0	0	0	0	0	0	0	0	0	0	0	0	0	0	0	0	0	0	0	0	NA	NA	52.2	0.6	0.00499473734570855	5.7410774088604e-05	1.2	0	0	0	0	0	-4.46590811865458	FALSE	FALSE
"1"	101066203	101068809	"+"	"ENSRNOG00000020543_002i"	"ENSRNOG00000020543"	"Nosip"	2606	15	9	4	19	14	0	0	0	0	0	40	1	6	2	1	1	0	0	0	0	0	0	35	1	0	3	0	2	0	0	0	0	0	0	0	0	4	0	0	0	1	0	0	0	0	0	9	0	0	0	NA	NA	12.2	0	0.0046815042210284	0	2	0	1	0	1	0	-Inf	FALSE	FALSE
"1"	101068982	101069369	"+"	"ENSRNOG00000020543_004i"	"ENSRNOG00000020543"	"Nosip"	387	0	0	0	0	4	0	0	0	0	0	0	0	11	15	9	16	13	8	0	1	2	11	60	12	0	0	0	0	0	0	0	0	0	0	0	0	0	0	0	0	1	0	0	0	0	0	0	0	0	0	NA	NA	0.8	0	0.0020671834625323	0	12.8	4.4	0	0	0.2	0	-Inf	FALSE	FALSE
"1"	101069476	101070004	"+"	"ENSRNOG00000020543_005i"	"ENSRNOG00000020543"	"Nosip"	528	5	5	7	4	6	0	0	0	0	0	48	0	4	3	5	0	0	0	2	0	0	0	24	4	5	0	3	0	2	0	0	0	0	0	0	0	0	1	1	1	0	0	0	0	0	0	5	0	0	0	NA	NA	5.4	0	0.0102272727272727	0	2.4	0.4	2	0	0.6	0	-Inf	TRUE	FALSE
"1"	101070087	101071247	"+"	"ENSRNOG00000020543_006i"	"ENSRNOG00000020543"	"Nosip"	1160	7	12	19	42	24	0	0	0	0	1	77	2	9	8	8	2	2	6	5	3	0	0	23	3	2	3	1	1	4	0	0	0	0	0	1	1	0	0	5	1	0	0	0	0	0	0	5	0	0	0	NA	NA	20.8	0.2	0.0179310344827586	0.000172413793103448	5.8	2.8	2.2	0	1.2	0	-4.64439089914137	TRUE	FALSE
"1"	101071408	101071488	"+"	"ENSRNOG00000020543_007i"	"ENSRNOG00000020543"	"Nosip"	80	0	0	2	3	4	0	0	0	0	0	1	0	17	28	24	21	26	23	11	4	5	5	54	12	0	0	0	2	2	0	0	0	0	0	0	0	0	0	2	1	2	0	0	0	0	0	1	0	0	0	NA	NA	1.8	0	0.0225	0	23.2	9.6	0.8	0	1	0	-Inf	FALSE	FALSE
"1"	101071608	101071705	"+"	"ENSRNOG00000020543_008i"	"ENSRNOG00000020543"	"Nosip"	97	1	0	3	0	1	0	0	0	0	0	0	0	6	8	2	0	5	11	0	2	0	0	68	7	0	0	3	0	1	0	0	0	0	0	0	0	1	0	2	0	0	0	0	0	0	0	0	0	0	0	NA	NA	1	0	0.0103092783505155	0	4.2	2.6	0.8	0	0.6	0	-Inf	FALSE	FALSE
"1"	101071894	101071968	"+"	"ENSRNOG00000020543_009i"	"ENSRNOG00000020543"	"Nosip"	74	0	0	0	0	2	0	0	0	0	0	0	0	7	4	15	3	14	0	11	0	0	0	39	0	0	0	0	0	0	0	0	0	0	0	0	0	0	0	0	0	2	0	0	0	0	0	0	0	0	0	NA	NA	0.4	0	0.00540540540540541	0	8.6	2.2	0	0	0.4	0	-Inf	FALSE	FALSE
"1"	101072078	101072382	"+"	"ENSRNOG00000020543_010i"	"ENSRNOG00000020543"	"Nosip"	304	1	0	0	3	4	0	0	0	0	0	1	0	20	13	9	2	6	3	1	1	1	0	42	6	0	0	0	1	1	0	0	0	0	0	0	0	1	0	0	0	0	0	0	0	0	0	0	0	0	0	NA	NA	1.6	0	0.00526315789473684	0	10	1.2	0.4	0	0.2	0	-Inf	FALSE	FALSE
"1"	101077405	101077565	"-"	"ENSRNOG00000043007_002i"	"ENSRNOG00000043007"	"Rcn3"	160	1	0	0	0	0	0	0	0	0	0	1	0	10	4	3	0	0	0	3	4	0	0	6	1	1	0	0	0	0	0	0	0	0	0	0	0	0	0	0	0	0	0	0	0	0	0	0	0	0	0	NA	NA	0.2	0	0.00125	0	3.4	1.4	0.2	0	0	0	-Inf	FALSE	FALSE
"1"	101077766	101078922	"-"	"ENSRNOG00000043007_003i"	"ENSRNOG00000043007"	"Rcn3"	1156	0	0	0	5	1	0	0	0	1	0	15	0	3	3	3	0	0	1	4	1	0	0	8	1	0	0	0	0	0	0	0	0	0	0	0	0	0	0	0	0	0	0	0	0	0	0	0	0	0	0	NA	NA	1.2	0.2	0.00103806228373702	0.000173010380622837	1.8	1.2	0	0	0	0	-1.79175946922805	FALSE	FALSE
"1"	101078984	101081048	"-"	"ENSRNOG00000043007_004i"	"ENSRNOG00000043007"	"Rcn3"	2064	18	27	16	13	3	16	13	11	2	0	56	0	1	2	1	0	0	0	0	1	0	0	1	0	0	0	0	0	0	0	0	0	0	0	3	0	0	0	0	0	0	0	0	0	0	0	0	0	0	0	NA	NA	15.4	8.4	0.00746124031007752	0.00406976744186047	0.8	0.2	0	0	0	0	-0.606135803570316	TRUE	FALSE
"1"	101081222	101082869	"-"	"ENSRNOG00000043007_005i"	"ENSRNOG00000043007"	"Rcn3"	1647	3	0	0	0	1	0	0	3	0	0	0	0	5	0	1	0	0	0	0	0	0	0	11	0	0	0	0	0	0	0	0	0	0	0	0	0	0	0	0	0	0	0	0	0	0	0	0	0	0	0	NA	NA	0.8	0.6	0.000485731633272617	0.000364298724954463	1.2	0	0	0	0	0	-0.287682072451781	FALSE	FALSE
"1"	101083073	101085419	"-"	"ENSRNOG00000043007_006i"	"ENSRNOG00000043007"	"Rcn3"	2346	4	0	0	0	0	0	1	0	0	0	0	1	4	4	0	0	0	0	6	0	0	0	12	1	0	0	0	0	0	0	0	0	0	0	0	0	0	0	0	0	0	0	0	0	0	0	0	0	0	0	NA	NA	0.8	0.2	0.000341005967604433	8.52514919011083e-05	1.6	1.2	0	0	0	0	-1.38629436111989	FALSE	FALSE
"1"	101085885	101086099	"-"	"ENSRNOG00000043007_008i"	"ENSRNOG00000043007"	"Rcn3"	214	0	0	0	0	0	0	0	0	0	0	0	0	0	0	3	0	0	0	0	0	0	0	4	1	0	0	0	0	0	0	0	0	0	0	0	0	0	0	0	0	0	0	0	0	0	0	0	0	0	0	NA	NA	0	0	0	0	0.6	0	0	0	0	0	NA	FALSE	FALSE
"1"	101087234	101087422	"-"	"ENSRNOG00000020583_001i"	"ENSRNOG00000020583"	"Fcgrt"	188	0	0	0	0	0	0	0	0	0	0	0	0	10	2	8	1	6	0	5	1	0	0	15	2	0	0	0	0	0	0	0	0	0	0	0	0	0	0	0	0	0	0	0	0	0	0	0	0	0	0	NA	NA	0	0	0	0	5.4	1.2	0	0	0	0	NA	FALSE	FALSE
"1"	101087540	101088581	"-"	"ENSRNOG00000020583_002i"	"ENSRNOG00000020583"	"Fcgrt"	1041	0	0	0	0	0	0	0	0	0	0	0	0	8	5	2	1	0	0	0	7	2	0	4	0	0	0	0	0	0	0	0	0	0	0	0	0	0	0	0	0	0	0	0	0	0	0	0	0	0	0	NA	NA	0	0	0	0	3.2	1.8	0	0	0	0	NA	FALSE	FALSE
"1"	101088852	101094233	"-"	"ENSRNOG00000020583_003i"	"ENSRNOG00000020583"	"Fcgrt"	5381	5	7	9	17	2	0	0	0	0	0	1	0	4	8	1	1	2	0	0	0	0	0	27	1	0	0	0	1	0	0	0	0	0	0	0	0	0	0	2	0	0	0	0	0	0	0	0	0	0	0	NA	NA	8	0	0.00148671250696896	0	3.2	0	0.2	0	0.4	0	-Inf	FALSE	FALSE
"1"	101094510	101094720	"-"	"ENSRNOG00000020583_004i"	"ENSRNOG00000020583"	"Fcgrt"	210	0	0	0	0	0	0	0	0	0	0	0	0	12	15	10	4	2	0	17	0	1	0	4	1	0	0	0	0	0	0	0	0	0	0	0	0	0	0	0	0	0	0	0	0	0	0	0	0	0	0	NA	NA	0	0	0	0	8.6	3.6	0	0	0	0	NA	FALSE	FALSE
"1"	101094979	101095322	"-"	"ENSRNOG00000020583_005i"	"ENSRNOG00000020583"	"Fcgrt"	343	0	0	0	0	0	0	0	0	0	0	0	0	3	2	2	0	1	0	3	0	0	0	6	3	0	0	0	0	0	0	0	0	0	0	0	0	0	0	0	0	0	0	0	0	0	0	0	0	0	0	NA	NA	0	0	0	0	1.6	0.6	0	0	0	0	NA	FALSE	FALSE
"1"	101116820	101117163	"-"	"ENSRNOG00000020595_001i"	"ENSRNOG00000020595"	"Rps11"	343	4	2	4	1	8	0	0	0	0	0	6	0	159	180	162	38	62	348	500	200	140	130	1021	29	0	0	4	0	3	0	0	0	0	0	1	0	1	1	0	0	0	0	0	0	0	0	1	0	0	0	NA	NA	3.8	0	0.0110787172011662	0	120.2	263.6	1.4	0	0.4	0	-Inf	TRUE	FALSE
"1"	101117294	101117598	"-"	"ENSRNOG00000020595_002i"	"ENSRNOG00000020595"	"Rps11"	304	15	9	8	16	28	0	0	0	1	6	12	0	374	659	385	271	226	1176	1255	655	443	326	827	33	0	0	0	0	0	0	0	0	1	0	0	0	0	2	2	0	2	0	0	0	0	0	6	0	0	0	NA	NA	15.2	1.4	0.05	0.00460526315789474	383	771	0	0.2	1.2	0	-2.38482319123102	TRUE	FALSE
"1"	101117675	101117857	"-"	"ENSRNOG00000020595_003i"	"ENSRNOG00000020595"	"Rps11"	182	7	5	7	6	4	0	3	0	4	6	15	0	283	446	416	210	135	955	825	487	307	169	1295	70	2	5	5	5	3	0	0	0	4	6	3	0	5	0	2	1	0	0	3	0	0	0	2	0	0	0	NA	NA	5.8	2.6	0.0318681318681319	0.0142857142857143	298	548.6	4	2	1.6	0.6	-0.802346472524937	TRUE	FALSE
"1"	101117990	101118732	"-"	"ENSRNOG00000020595_004i"	"ENSRNOG00000020595"	"Rps11"	742	11	25	10	8	13	0	5	0	0	4	71	10	24	40	36	0	2	29	38	21	0	1	296	172	1	0	0	0	0	0	0	0	0	0	0	0	5	2	5	1	2	0	0	0	0	2	0	0	0	0	NA	NA	13.4	1.8	0.0180592991913747	0.00242587601078167	20.4	17.8	0.2	0	3	0.4	-2.00746804205475	TRUE	FALSE
"1"	101120824	101120908	"-"	"ENSRNOG00000020618_001i"	"ENSRNOG00000020618"	"Gm45713"	84	1	1	3	1	5	0	0	0	0	0	0	0	224	348	230	48	70	714	713	339	119	112	629	135	1	1	3	0	2	0	0	0	0	0	0	0	1	0	3	1	3	0	0	0	0	0	0	0	0	0	NA	NA	2.2	0	0.0261904761904762	0	184	399.4	1.4	0	1.6	0	-Inf	TRUE	FALSE
"1"	101121032	101121258	"-"	"ENSRNOG00000020618_002i"	"ENSRNOG00000020618"	"Gm45713"	226	14	21	31	4	8	16	33	15	12	3	31	0	286	550	353	118	130	1111	1254	466	203	157	391	53	0	0	0	0	2	4	0	0	0	0	0	0	10	17	26	2	5	12	32	13	12	1	10	0	0	0	NA	NA	15.6	15.8	0.0690265486725664	0.0699115044247788	287.4	638.2	0.4	0.8	12	14	0.0127390257774299	TRUE	TRUE
"1"	101121319	101121489	"-"	"ENSRNOG00000020618_003i"	"ENSRNOG00000020618"	"Gm45713"	170	4	9	3	13	31	0	0	0	0	3	7	0	65	126	67	38	35	166	269	74	130	188	726	38	0	9	0	12	24	0	0	0	0	3	0	0	0	0	0	0	4	0	0	0	0	0	0	0	0	0	NA	NA	12	0.6	0.0705882352941176	0.00352941176470588	66.2	165.4	9	0.6	0.8	0	-2.99573227355399	TRUE	FALSE
"1"	101121576	101121778	"-"	"ENSRNOG00000020618_004i"	"ENSRNOG00000020618"	"Gm45713"	202	10	8	7	12	10	12	1	3	1	0	15	0	330	415	249	145	182	837	970	447	534	381	1423	29	1	5	0	8	1	0	0	0	1	0	0	0	9	1	7	3	6	3	1	3	0	0	8	0	0	0	NA	NA	9.4	3.4	0.0465346534653465	0.0168316831683168	264.2	633.8	3	0.2	5.2	1.4	-1.01693425765384	TRUE	FALSE
"1"	101121881	101121977	"-"	"ENSRNOG00000020618_005i"	"ENSRNOG00000020618"	"Gm45713"	96	1	2	0	2	5	0	0	0	0	0	30	1	418	626	428	237	232	1646	1614	696	595	429	1870	171	0	0	0	0	0	0	0	0	0	0	0	0	1	2	0	2	5	0	0	0	0	0	17	0	0	0	NA	NA	2	0	0.0208333333333333	0	388.2	996	0	0	2	0	-Inf	FALSE	FALSE
"1"	101122044	101122286	"-"	"ENSRNOG00000020618_006i"	"ENSRNOG00000020618"	"Gm45713"	242	15	16	14	12	42	0	0	12	3	4	33	1	63	80	52	37	26	225	207	118	88	79	649	55	6	10	2	3	15	0	0	0	0	0	9	1	1	0	4	3	8	0	0	6	0	4	7	0	0	0	NA	NA	19.8	3.8	0.0818181818181818	0.015702479338843	51.6	143.4	7.2	0	3.2	2	-1.65068087096815	TRUE	FALSE
"1"	101122360	101123372	"-"	"ENSRNOG00000020618_007i"	"ENSRNOG00000020618"	"Gm45713"	1012	27	27	15	28	17	2	0	0	0	0	209	37	0	0	0	0	1	0	0	0	0	0	364	77	0	0	0	0	0	0	0	0	0	0	45	2	0	3	0	5	3	0	0	0	0	0	1	0	0	0	NA	NA	22.8	0.4	0.0225296442687747	0.000395256916996047	0.2	0	0	0	2.2	0	-4.04305126783455	TRUE	FALSE
"1"	101126987	101127069	"-"	"ENSRNOG00000056212_001i"	"ENSRNOG00000056212"	"Flt3lg"	82	0	0	0	0	0	0	0	0	0	0	0	0	0	0	0	0	0	0	0	0	0	0	0	0	0	0	0	0	0	0	0	0	0	0	0	0	0	0	0	0	0	0	0	0	0	0	0	0	0	0	NA	NA	0	0	0	0	0	0	0	0	0	0	NA	FALSE	FALSE
"1"	101127249	101128648	"-"	"ENSRNOG00000056212_002i"	"ENSRNOG00000056212"	"Flt3lg"	1399	1	5	3	6	15	0	0	0	0	1	10	0	0	0	0	0	0	0	0	0	0	0	0	0	0	5	0	0	0	0	0	0	0	0	0	0	0	0	0	0	2	0	0	0	0	0	0	0	0	0	NA	NA	6	0.2	0.00428877769835597	0.000142959256611866	0	0	1	0	0.4	0	-3.40119738166216	FALSE	FALSE
"1"	101128794	101129299	"-"	"ENSRNOG00000056212_003i"	"ENSRNOG00000056212"	"Flt3lg"	505	0	0	0	0	3	0	0	0	0	0	0	0	5	0	1	0	0	0	0	0	0	0	1	0	0	0	0	0	2	0	0	0	0	0	0	0	0	0	0	0	1	0	0	0	0	0	0	0	0	0	NA	NA	0.6	0	0.00118811881188119	0	1.2	0	0.4	0	0.2	0	-Inf	FALSE	FALSE
"1"	101129444	101130029	"-"	"ENSRNOG00000056212_004i"	"ENSRNOG00000056212"	"Flt3lg"	585	0	0	0	14	8	0	0	0	0	0	0	0	0	0	0	0	0	0	0	0	0	0	0	0	0	0	0	0	0	0	0	0	0	0	0	0	0	0	0	0	0	0	0	0	0	0	0	0	0	0	NA	NA	4.4	0	0.00752136752136752	0	0	0	0	0	0	0	-Inf	FALSE	FALSE
"1"	101130084	101130600	"-"	"ENSRNOG00000056212_005i"	"ENSRNOG00000056212"	"Flt3lg"	516	4	2	1	13	14	0	0	0	0	1	0	0	0	0	0	0	0	0	0	0	0	0	0	0	0	0	0	0	0	0	0	0	0	0	0	0	0	0	0	0	0	0	0	0	0	0	0	0	0	0	NA	NA	6.8	0.2	0.0131782945736434	0.000387596899224806	0	0	0	0	0	0	-3.52636052461616	TRUE	FALSE
"1"	101130715	101130979	"-"	"ENSRNOG00000056212_006i"	"ENSRNOG00000056212"	"Flt3lg"	264	0	0	0	1	0	0	0	0	0	0	0	0	0	0	1	0	0	0	0	0	0	0	0	0	0	0	0	0	0	0	0	0	0	0	0	0	0	0	0	1	0	0	0	0	0	0	0	0	0	0	NA	NA	0.2	0	0.000757575757575758	0	0.2	0	0	0	0.2	0	-Inf	FALSE	FALSE
"1"	101138510	101139121	"-"	"ENSRNOG00000020623_001i"	"ENSRNOG00000020623"	"Aldh16a1"	611	2	0	2	7	5	0	0	0	0	0	6	0	0	0	1	0	1	8	2	0	0	0	14	1	2	0	2	2	0	0	0	0	0	0	0	0	0	0	0	0	0	0	0	0	0	0	1	0	0	0	NA	NA	3.2	0	0.00523731587561375	0	0.4	2	1.2	0	0	0	-Inf	FALSE	FALSE
"1"	101139245	101139456	"-"	"ENSRNOG00000020623_002i"	"ENSRNOG00000020623"	"Aldh16a1"	211	2	2	0	4	10	0	0	0	0	0	0	0	1	0	1	0	2	2	0	2	0	0	12	0	2	0	0	0	6	0	0	0	0	0	0	0	0	0	0	1	0	0	0	0	0	0	0	0	0	0	NA	NA	3.6	0	0.0170616113744076	0	0.8	0.8	1.6	0	0.2	0	-Inf	FALSE	FALSE
"1"	101139643	101140630	"-"	"ENSRNOG00000020623_003i"	"ENSRNOG00000020623"	"Aldh16a1"	987	1	1	3	0	0	0	0	0	0	0	0	0	0	1	0	0	0	0	0	0	0	0	11	0	0	0	3	0	0	0	0	0	0	0	0	0	0	0	0	0	0	0	0	0	0	0	0	0	0	0	NA	NA	1	0	0.00101317122593718	0	0.2	0	0.6	0	0	0	-Inf	FALSE	FALSE
"1"	101140833	101140984	"-"	"ENSRNOG00000020623_004i"	"ENSRNOG00000020623"	"Aldh16a1"	151	0	0	0	3	0	0	0	0	0	0	0	0	1	0	0	0	0	0	0	0	0	1	17	0	0	0	0	0	0	0	0	0	0	0	0	0	0	0	0	0	0	0	0	0	0	0	0	0	0	0	NA	NA	0.6	0	0.00397350993377483	0	0.2	0.2	0	0	0	0	-Inf	FALSE	FALSE
"1"	101141153	101141578	"-"	"ENSRNOG00000020623_005i"	"ENSRNOG00000020623"	"Aldh16a1"	425	0	3	0	0	0	0	0	0	0	0	0	0	3	8	0	0	0	0	1	0	0	0	4	1	0	3	0	0	0	0	0	0	0	0	0	0	0	0	0	0	0	0	0	0	0	0	0	0	0	0	NA	NA	0.6	0	0.00141176470588235	0	2.2	0.2	0.6	0	0	0	-Inf	FALSE	FALSE
"1"	101141710	101141825	"-"	"ENSRNOG00000020623_006i"	"ENSRNOG00000020623"	"Aldh16a1"	115	3	0	1	3	2	0	0	0	0	0	0	0	2	5	3	0	6	0	0	0	3	3	5	0	0	0	1	3	2	0	0	0	0	0	0	0	3	0	0	0	0	0	0	0	0	0	0	0	0	0	NA	NA	1.8	0	0.0156521739130435	0	3.2	1.2	1.2	0	0.6	0	-Inf	FALSE	FALSE
"1"	101141932	101142040	"-"	"ENSRNOG00000020623_007i"	"ENSRNOG00000020623"	"Aldh16a1"	108	1	1	1	10	10	0	0	0	0	0	0	0	4	0	0	1	4	0	2	0	0	1	2	0	1	0	0	10	9	0	0	0	0	0	0	0	0	1	1	0	1	0	0	0	0	0	0	0	0	0	NA	NA	4.6	0	0.0425925925925926	0	1.8	0.6	4	0	0.6	0	-Inf	TRUE	FALSE
"1"	101142178	101142366	"-"	"ENSRNOG00000020623_008i"	"ENSRNOG00000020623"	"Aldh16a1"	188	0	4	1	5	2	0	0	0	0	0	1	0	3	3	6	1	6	0	0	3	0	0	2	0	0	3	0	4	1	0	0	0	0	0	0	0	0	1	0	1	1	0	0	0	0	0	0	0	0	0	NA	NA	2.4	0	0.0127659574468085	0	3.8	0.6	1.6	0	0.6	0	-Inf	FALSE	FALSE
"1"	101142463	101142765	"-"	"ENSRNOG00000020623_009i"	"ENSRNOG00000020623"	"Aldh16a1"	302	0	0	0	0	3	0	0	0	0	0	0	0	0	2	0	2	6	2	6	0	0	0	9	0	0	0	0	0	0	0	0	0	0	0	0	0	0	0	0	0	3	0	0	0	0	0	0	0	0	0	NA	NA	0.6	0	0.00198675496688742	0	2	1.6	0	0	0.6	0	-Inf	FALSE	FALSE
"1"	101142952	101143310	"-"	"ENSRNOG00000020623_010i"	"ENSRNOG00000020623"	"Aldh16a1"	358	0	0	0	0	12	0	0	0	0	1	0	0	6	3	2	2	1	3	1	0	0	0	2	0	0	0	0	0	4	0	0	0	0	0	0	0	0	0	0	0	0	0	0	0	0	0	0	0	0	0	NA	NA	2.4	0.2	0.00670391061452514	0.000558659217877095	2.8	0.8	0.8	0	0	0	-2.484906649788	FALSE	FALSE
"1"	101143464	101143546	"-"	"ENSRNOG00000020623_011i"	"ENSRNOG00000020623"	"Aldh16a1"	82	0	0	0	0	1	0	0	0	0	0	0	0	0	2	0	0	1	0	0	0	0	0	4	0	0	0	0	0	0	0	0	0	0	0	0	0	0	0	0	0	1	0	0	0	0	0	0	0	0	0	NA	NA	0.2	0	0.0024390243902439	0	0.6	0	0	0	0.2	0	-Inf	FALSE	FALSE
"1"	101143729	101143867	"-"	"ENSRNOG00000020623_012i"	"ENSRNOG00000020623"	"Aldh16a1"	138	0	0	0	0	0	0	0	0	0	0	0	0	4	0	0	4	8	3	0	0	6	3	5	0	0	0	0	0	0	0	0	0	0	0	0	0	0	0	0	0	0	0	0	0	0	0	0	0	0	0	NA	NA	0	0	0	0	3.2	2.4	0	0	0	0	NA	FALSE	FALSE
"1"	101143946	101144027	"-"	"ENSRNOG00000020623_013i"	"ENSRNOG00000020623"	"Aldh16a1"	81	2	0	1	0	0	0	0	0	0	0	0	0	0	4	3	2	1	0	4	0	0	0	4	0	2	0	1	0	0	0	0	0	0	0	0	0	0	0	0	0	0	0	0	0	0	0	0	0	0	0	NA	NA	0.6	0	0.00740740740740741	0	2	0.8	0.6	0	0	0	-Inf	FALSE	FALSE
"1"	101144207	101144726	"-"	"ENSRNOG00000020623_014i"	"ENSRNOG00000020623"	"Aldh16a1"	519	0	0	0	2	2	0	0	0	0	0	0	0	1	0	0	0	0	0	6	0	0	0	6	0	0	0	0	0	0	0	0	0	0	0	0	0	0	0	0	0	0	0	0	0	0	0	0	0	0	0	NA	NA	0.8	0	0.00154142581888247	0	0.2	1.2	0	0	0	0	-Inf	FALSE	FALSE
"1"	101144854	101146045	"-"	"ENSRNOG00000020623_015i"	"ENSRNOG00000020623"	"Aldh16a1"	1191	0	2	2	3	8	0	0	0	0	0	0	0	0	6	0	3	3	0	7	0	0	0	1	0	0	0	1	0	0	0	0	0	0	0	0	0	0	2	0	0	0	0	0	0	0	0	0	0	0	0	NA	NA	3	0	0.00251889168765743	0	2.4	1.4	0.2	0	0.4	0	-Inf	FALSE	FALSE
"1"	101146149	101151173	"-"	"ENSRNOG00000020623_016i"	"ENSRNOG00000020623"	"Aldh16a1"	5024	24	17	6	17	41	10	0	0	0	13	13	4	0	6	3	0	0	0	7	0	0	0	13	0	0	0	0	0	0	0	0	0	0	0	0	0	0	0	0	0	0	0	0	0	0	0	0	0	0	0	NA	NA	21	4.6	0.00417993630573248	0.000915605095541401	1.8	1.4	0	0	0	0	-1.51846613422837	FALSE	FALSE
"1"	101153153	101153502	"+"	"ENSRNOG00000020634_001i"	"ENSRNOG00000020634"	"Pih1d1"	349	0	6	1	0	0	0	0	0	0	0	1	0	2	16	2	4	8	0	14	0	0	0	7	1	0	0	0	0	0	0	0	0	0	0	0	0	0	0	0	0	0	0	0	0	0	0	0	0	0	0	NA	NA	1.4	0	0.00401146131805158	0	6.4	2.8	0	0	0	0	-Inf	FALSE	FALSE
"1"	101153570	101154324	"+"	"ENSRNOG00000020634_002i"	"ENSRNOG00000020634"	"Pih1d1"	754	1	0	0	0	0	0	0	0	0	0	1	1	13	20	18	46	48	5	10	8	7	4	17	2	0	0	0	0	0	0	0	0	0	0	0	0	0	0	0	0	0	0	0	0	0	0	1	1	0	0	NA	NA	0.2	0	0.00026525198938992	0	29	6.8	0	0	0	0	-Inf	FALSE	FALSE
"1"	101154505	101155179	"+"	"ENSRNOG00000020634_003i"	"ENSRNOG00000020634"	"Pih1d1"	674	6	2	0	3	3	0	0	0	0	0	3	4	0	0	0	3	2	0	0	0	0	0	23	4	0	2	0	0	0	0	0	0	0	0	0	0	0	0	0	1	1	0	0	0	0	0	0	0	0	0	NA	NA	2.8	0	0.00415430267062315	0	1	0	0.4	0	0.4	0	-Inf	FALSE	FALSE
"1"	101155242	101155329	"+"	"ENSRNOG00000020634_004i"	"ENSRNOG00000020634"	"Pih1d1"	87	0	0	1	5	5	0	0	0	0	0	9	0	16	10	8	7	2	1	3	6	1	2	34	11	0	0	0	5	5	0	0	0	0	0	7	0	0	0	1	0	0	0	0	0	0	0	0	0	0	0	NA	NA	2.2	0	0.0252873563218391	0	8.6	2.6	2	0	0.2	0	-Inf	FALSE	FALSE
"1"	101155412	101155698	"+"	"ENSRNOG00000020634_005i"	"ENSRNOG00000020634"	"Pih1d1"	286	3	0	0	3	2	1	0	0	0	4	2	0	0	14	5	7	4	0	9	0	2	1	85	5	0	0	0	0	0	0	0	0	0	0	0	0	0	0	0	1	1	1	0	0	0	0	1	0	0	0	NA	NA	1.6	1	0.00559440559440559	0.0034965034965035	6	2.4	0	0	0.4	0.2	-0.470003629245736	FALSE	FALSE
"1"	101155829	101155950	"+"	"ENSRNOG00000020634_006i"	"ENSRNOG00000020634"	"Pih1d1"	121	2	1	0	0	0	0	0	0	0	0	0	0	2	22	7	6	1	8	7	0	4	0	44	3	0	0	0	0	0	0	0	0	0	0	0	0	2	1	0	0	0	0	0	0	0	0	0	0	0	0	NA	NA	0.6	0	0.00495867768595041	0	7.6	3.8	0	0	0.6	0	-Inf	FALSE	FALSE
"1"	101156027	101156378	"+"	"ENSRNOG00000020634_007i"	"ENSRNOG00000020634"	"Pih1d1"	351	2	0	0	0	6	0	0	0	0	0	0	0	7	15	5	9	5	5	2	5	8	0	62	3	2	0	0	0	0	0	0	0	0	0	0	0	0	0	0	0	3	0	0	0	0	0	0	0	0	0	NA	NA	1.6	0	0.00455840455840456	0	8.2	4	0.4	0	0.6	0	-Inf	FALSE	FALSE
"1"	101156523	101156682	"+"	"ENSRNOG00000020634_008i"	"ENSRNOG00000020634"	"Pih1d1"	159	0	0	3	1	0	0	0	0	0	0	0	0	0	1	5	6	2	0	4	1	5	2	11	6	0	0	0	0	0	0	0	0	0	0	0	0	0	0	3	1	0	0	0	0	0	0	0	0	0	0	NA	NA	0.8	0	0.0050314465408805	0	2.8	2.4	0	0	0.8	0	-Inf	FALSE	FALSE
"1"	101161447	101166102	"+"	"ENSRNOG00000020650_002i"	"ENSRNOG00000020650"	"Slc17a7"	4655	27	27	19	463	417	0	4	5	216	135	298	60	14	14	25	22	21	16	14	10	9	11	650	118	0	1	0	0	0	0	0	0	0	0	0	0	0	2	0	0	3	0	0	0	0	0	0	0	0	0	14	NA	190.6	72	0.0409452201933405	0.0154672395273899	19.2	12	0.2	0	1	0	-0.973510872204046	TRUE	FALSE
"1"	101166356	101166900	"+"	"ENSRNOG00000020650_003i"	"ENSRNOG00000020650"	"Slc17a7"	544	76	104	148	223	346	7	6	3	5	23	103	1	176	290	259	487	440	127	108	148	120	129	1407	63	10	17	22	45	63	0	3	0	0	10	24	0	11	8	18	5	7	0	0	0	0	2	6	0	0	0	50	NA	179.4	8.8	0.329779411764706	0.0161764705882353	330.4	126.4	31.4	2.6	9.8	0.4	-3.01486622814053	TRUE	TRUE
"1"	101166976	101167208	"+"	"ENSRNOG00000020650_004i"	"ENSRNOG00000020650"	"Slc17a7"	232	7	4	24	23	26	0	0	0	0	4	32	0	194	300	275	466	453	123	117	151	116	127	744	122	3	4	11	0	4	0	0	0	0	2	2	0	0	0	2	10	9	0	0	0	0	1	9	0	0	0	NA	NA	16.8	0.8	0.0724137931034483	0.00344827586206897	337.6	126.8	4.4	0.4	4.2	0.2	-3.04452243772342	TRUE	FALSE
"1"	101167328	101167599	"+"	"ENSRNOG00000020650_005i"	"ENSRNOG00000020650"	"Slc17a7"	271	5	8	9	29	24	0	0	0	0	0	32	0	174	192	193	162	268	83	104	114	103	107	1631	3	0	4	0	4	1	0	0	0	0	0	0	0	4	0	3	12	15	0	0	0	0	0	4	0	0	0	NA	NA	15	0	0.0553505535055351	0	197.8	102.2	1.8	0	6.8	0	-Inf	TRUE	FALSE
"1"	101167715	101167790	"+"	"ENSRNOG00000020650_006i"	"ENSRNOG00000020650"	"Slc17a7"	75	16	14	23	77	83	1	3	0	5	11	48	0	191	272	245	248	226	150	85	188	110	122	839	23	15	13	20	66	74	1	3	0	5	9	9	0	1	4	6	14	13	0	0	0	1	2	3	0	0	0	NA	NA	42.6	4	0.568	0.0533333333333333	236.4	131	37.6	3.6	7.6	0.6	-2.36555989215543	TRUE	FALSE
"1"	101167879	101168019	"+"	"ENSRNOG00000020650_007i"	"ENSRNOG00000020650"	"Slc17a7"	140	0	1	0	33	38	8	0	0	0	3	32	0	37	62	36	110	64	39	8	22	13	37	754	5	0	1	0	16	14	0	0	0	0	0	8	0	0	0	0	4	7	8	0	0	0	0	12	0	0	0	NA	NA	14.4	2.2	0.102857142857143	0.0157142857142857	61.8	23.8	6.2	0	2.2	1.6	-1.87877084621768	FALSE	FALSE
"1"	101168107	101168201	"+"	"ENSRNOG00000020650_008i"	"ENSRNOG00000020650"	"Slc17a7"	94	2	5	1	4	7	0	0	0	0	0	0	0	250	270	304	294	303	151	109	192	166	195	907	38	0	0	0	4	6	0	0	0	0	0	0	0	2	5	1	0	1	0	0	0	0	0	0	0	0	0	NA	NA	3.8	0	0.0404255319148936	0	284.2	162.6	2	0	1.8	0	-Inf	TRUE	FALSE
"1"	101168345	101169133	"+"	"ENSRNOG00000020650_009i"	"ENSRNOG00000020650"	"Slc17a7"	788	6	4	4	34	64	0	0	0	0	1	11	1	482	668	546	631	707	301	195	381	207	246	1126	27	0	0	0	0	0	0	0	0	0	0	0	0	3	0	2	12	18	0	0	0	0	0	0	0	0	0	NA	NA	22.4	0.2	0.0284263959390863	0.000253807106598985	606.8	266	0	0	7	0	-4.71849887129509	TRUE	FALSE
"1"	101169284	101169409	"+"	"ENSRNOG00000020650_010i"	"ENSRNOG00000020650"	"Slc17a7"	125	0	0	0	0	0	0	0	0	0	0	14	0	174	209	236	214	225	139	91	80	46	85	1479	19	0	0	0	0	0	0	0	0	0	0	1	0	0	0	0	0	0	0	0	0	0	0	1	0	0	0	NA	NA	0	0	0	0	211.6	88.2	0	0	0	0	NA	FALSE	FALSE
"1"	101169543	101170216	"+"	"ENSRNOG00000020650_011i"	"ENSRNOG00000020650"	"Slc17a7"	673	2	2	2	2	3	0	0	3	0	0	6	0	104	119	102	1526	1327	82	28	74	563	532	1367	41	0	0	0	0	0	0	0	0	0	0	0	0	0	0	0	1	2	0	0	0	0	0	1	0	0	0	NA	NA	2.2	0.6	0.00326894502228826	0.000891530460624071	635.6	255.8	0	0	0.6	0	-1.29928298413026	FALSE	FALSE
"1"	101170328	101170690	"+"	"ENSRNOG00000020650_012i"	"ENSRNOG00000020650"	"Slc17a7"	362	1	3	2	7	8	0	0	0	2	0	1	0	179	210	223	364	405	118	74	106	211	205	729	5	0	0	0	0	0	0	0	0	0	0	0	0	0	2	0	1	1	0	0	0	0	0	0	0	0	0	NA	NA	4.2	0.4	0.0116022099447514	0.00110497237569061	276.2	142.8	0	0	0.8	0	-2.35137525716348	TRUE	FALSE
"1"	101170819	101171794	"+"	"ENSRNOG00000020650_013i"	"ENSRNOG00000020650"	"Slc17a7"	975	18	2	5	17	28	0	7	0	1	1	8	0	128	133	159	172	179	136	86	100	89	86	1034	60	0	0	3	2	8	0	0	0	0	0	0	0	5	0	0	0	2	0	0	0	0	1	1	0	0	0	NA	NA	14	1.8	0.0143589743589744	0.00184615384615385	154.2	99.4	2.6	0	1.4	0.2	-2.05127066471314	TRUE	FALSE
"1"	101173649	101173963	"-"	"ENSRNOG00000047401_001i"	"ENSRNOG00000047401"	"Gfy"	314	0	0	0	0	0	0	0	0	0	0	0	0	0	0	0	0	3	8	0	0	0	0	0	0	0	0	0	0	0	0	0	0	0	0	0	0	0	0	0	0	0	0	0	0	0	0	0	0	0	0	NA	NA	0	0	0	0	0.6	1.6	0	0	0	0	NA	FALSE	FALSE
"1"	101174138	101174411	"-"	"ENSRNOG00000047401_002i"	"ENSRNOG00000047401"	"Gfy"	273	0	0	0	0	0	0	0	0	0	0	0	0	0	0	0	0	0	0	0	0	0	0	0	0	0	0	0	0	0	0	0	0	0	0	0	0	0	0	0	0	0	0	0	0	0	0	0	0	0	0	NA	NA	0	0	0	0	0	0	0	0	0	0	NA	FALSE	FALSE
"1"	101178344	101178512	"+"	"ENSRNOG00000020681_001i"	"ENSRNOG00000020681"	"Pth2"	168	0	0	0	0	0	0	0	0	0	0	0	0	0	0	1	0	0	0	0	0	0	0	4	0	0	0	0	0	0	0	0	0	0	0	0	0	0	0	0	0	0	0	0	0	0	0	0	0	0	0	NA	NA	0	0	0	0	0.2	0	0	0	0	0	NA	FALSE	FALSE
"1"	101180799	101180908	"-"	"ENSRNOG00000025378_001i"	"ENSRNOG00000025378"	"Ccdc155"	109	0	0	0	0	0	0	0	0	0	0	0	0	0	0	0	1	2	0	0	0	0	0	0	0	0	0	0	0	0	0	0	0	0	0	0	0	0	0	0	0	0	0	0	0	0	0	0	0	0	0	NA	NA	0	0	0	0	0.6	0	0	0	0	0	NA	FALSE	FALSE
"1"	101181026	101181103	"-"	"ENSRNOG00000025378_002i"	"ENSRNOG00000025378"	"Ccdc155"	77	0	0	0	0	3	0	0	0	0	0	0	0	0	0	0	0	1	0	0	0	0	0	0	0	0	0	0	0	3	0	0	0	0	0	0	0	0	0	0	0	0	0	0	0	0	0	0	0	0	0	NA	NA	0.6	0	0.00779220779220779	0	0.2	0	0.6	0	0	0	-Inf	FALSE	FALSE
"1"	101181169	101182151	"-"	"ENSRNOG00000025378_003i"	"ENSRNOG00000025378"	"Ccdc155"	982	0	1	0	1	0	0	0	0	0	0	0	0	0	0	1	0	2	0	0	0	0	0	0	0	0	0	0	0	0	0	0	0	0	0	0	0	0	0	0	0	0	0	0	0	0	0	0	0	0	0	NA	NA	0.4	0	0.000407331975560081	0	0.6	0	0	0	0	0	-Inf	FALSE	FALSE
"1"	101182201	101183556	"-"	"ENSRNOG00000025378_004i"	"ENSRNOG00000025378"	"Ccdc155"	1355	0	0	0	0	3	0	0	0	0	2	0	0	0	0	1	1	0	0	0	0	0	0	0	0	0	0	0	0	0	0	0	0	0	0	0	0	0	0	0	0	0	0	0	0	0	0	0	0	0	0	NA	NA	0.6	0.4	0.00044280442804428	0.00029520295202952	0.4	0	0	0	0	0	-0.405465108108164	FALSE	FALSE
"1"	101183619	101183879	"-"	"ENSRNOG00000025378_005i"	"ENSRNOG00000025378"	"Ccdc155"	260	0	0	0	0	0	0	0	0	0	0	0	0	0	0	0	0	0	0	5	0	0	0	0	0	0	0	0	0	0	0	0	0	0	0	0	0	0	0	0	0	0	0	0	0	0	0	0	0	0	0	NA	NA	0	0	0	0	0	1	0	0	0	0	NA	FALSE	FALSE
"1"	101183903	101184002	"-"	"ENSRNOG00000025378_006i"	"ENSRNOG00000025378"	"Ccdc155"	99	0	0	0	0	0	0	0	0	0	0	0	0	0	0	0	0	0	0	5	0	0	0	0	0	0	0	0	0	0	0	0	0	0	0	0	0	0	0	0	0	0	0	0	0	0	0	0	0	0	0	NA	NA	0	0	0	0	0	1	0	0	0	0	NA	FALSE	FALSE
"1"	101184016	101185110	"-"	"ENSRNOG00000025378_007i"	"ENSRNOG00000025378"	"Ccdc155"	1094	0	0	0	0	0	0	0	0	0	0	0	0	0	0	0	0	0	0	5	0	0	0	0	0	0	0	0	0	0	0	0	0	0	0	0	0	0	0	0	0	0	0	0	0	0	0	0	0	0	0	NA	NA	0	0	0	0	0	1	0	0	0	0	NA	FALSE	FALSE
"1"	101185228	101185484	"-"	"ENSRNOG00000025378_008i"	"ENSRNOG00000025378"	"Ccdc155"	256	0	0	3	0	1	0	0	0	0	0	0	0	0	0	0	0	0	0	0	0	0	0	0	0	0	0	0	0	0	0	0	0	0	0	0	0	0	0	0	0	0	0	0	0	0	0	0	0	0	0	NA	NA	0.8	0	0.003125	0	0	0	0	0	0	0	-Inf	FALSE	FALSE
"1"	101185573	101185726	"-"	"ENSRNOG00000025378_009i"	"ENSRNOG00000025378"	"Ccdc155"	153	0	0	0	0	0	0	0	0	0	0	0	0	0	0	0	0	0	0	0	0	0	0	0	0	0	0	0	0	0	0	0	0	0	0	0	0	0	0	0	0	0	0	0	0	0	0	0	0	0	0	NA	NA	0	0	0	0	0	0	0	0	0	0	NA	FALSE	FALSE
"1"	101185792	101186180	"-"	"ENSRNOG00000025378_010i"	"ENSRNOG00000025378"	"Ccdc155"	388	0	0	0	0	0	0	0	0	0	1	0	0	0	0	0	0	0	0	0	0	0	0	0	0	0	0	0	0	0	0	0	0	0	0	0	0	0	0	0	0	0	0	0	0	0	0	0	0	0	0	NA	NA	0	0.2	0	0.000515463917525773	0	0	0	0	0	0	Inf	FALSE	FALSE
"1"	101186241	101186464	"-"	"ENSRNOG00000025378_011i"	"ENSRNOG00000025378"	"Ccdc155"	223	0	0	0	1	0	0	0	0	0	0	0	0	0	0	0	0	0	0	0	0	0	0	0	0	0	0	0	0	0	0	0	0	0	0	0	0	0	0	0	0	0	0	0	0	0	0	0	0	0	0	NA	NA	0.2	0	0.000896860986547085	0	0	0	0	0	0	0	-Inf	FALSE	FALSE
"1"	101186522	101186887	"-"	"ENSRNOG00000025378_012i"	"ENSRNOG00000025378"	"Ccdc155"	365	0	0	0	0	0	0	0	0	0	0	0	0	0	0	0	0	0	0	0	0	0	0	0	0	0	0	0	0	0	0	0	0	0	0	0	0	0	0	0	0	0	0	0	0	0	0	0	0	0	0	NA	NA	0	0	0	0	0	0	0	0	0	0	NA	FALSE	FALSE
"1"	101186966	101190981	"-"	"ENSRNOG00000025378_013i"	"ENSRNOG00000025378"	"Ccdc155"	4015	3	8	2	6	2	0	0	0	0	6	12	0	0	0	0	0	0	0	0	0	0	0	0	0	0	0	0	0	0	0	0	0	0	0	0	0	0	0	0	0	0	0	0	0	0	0	0	0	0	0	NA	NA	4.2	1.2	0.00104607721046077	0.000298879202988792	0	0	0	0	0	0	-1.25276296849537	FALSE	FALSE
"1"	101191033	101191256	"-"	"ENSRNOG00000025378_014i"	"ENSRNOG00000025378"	"Ccdc155"	223	0	0	0	0	0	0	0	0	0	0	0	0	0	0	0	0	0	0	0	0	0	0	0	0	0	0	0	0	0	0	0	0	0	0	0	0	0	0	0	0	0	0	0	0	0	0	0	0	0	0	NA	NA	0	0	0	0	0	0	0	0	0	0	NA	FALSE	FALSE
"1"	101191375	101191720	"-"	"ENSRNOG00000025378_015i"	"ENSRNOG00000025378"	"Ccdc155"	345	0	0	0	1	1	0	0	0	0	0	0	0	0	0	1	0	0	0	0	0	0	0	0	0	0	0	0	0	0	0	0	0	0	0	0	0	0	0	0	0	0	0	0	0	0	0	0	0	0	0	NA	NA	0.4	0	0.00115942028985507	0	0.2	0	0	0	0	0	-Inf	FALSE	FALSE
"1"	101191883	101192093	"-"	"ENSRNOG00000025378_016i"	"ENSRNOG00000025378"	"Ccdc155"	210	0	0	0	1	0	0	0	0	0	0	0	0	0	0	0	0	0	0	0	0	0	0	0	0	0	0	0	0	0	0	0	0	0	0	0	0	0	0	0	0	0	0	0	0	0	0	0	0	0	0	NA	NA	0.2	0	0.000952380952380952	0	0	0	0	0	0	0	-Inf	FALSE	FALSE
"1"	101192161	101193328	"-"	"ENSRNOG00000025378_017i"	"ENSRNOG00000025378"	"Ccdc155"	1167	0	0	0	1	1	0	0	0	0	0	1	0	0	0	0	0	0	0	0	0	0	0	0	0	0	0	0	0	0	0	0	0	0	0	0	0	0	0	0	0	0	0	0	0	0	0	0	0	0	0	NA	NA	0.4	0	0.000342759211653813	0	0	0	0	0	0	0	-Inf	FALSE	FALSE
"1"	101193394	101193751	"-"	"ENSRNOG00000025378_018i"	"ENSRNOG00000025378"	"Ccdc155"	357	0	0	0	0	0	0	0	0	0	0	0	0	0	0	0	0	0	0	0	0	0	0	0	0	0	0	0	0	0	0	0	0	0	0	0	0	0	0	0	0	0	0	0	0	0	0	0	0	0	0	NA	NA	0	0	0	0	0	0	0	0	0	0	NA	FALSE	FALSE
"1"	101193939	101194274	"-"	"ENSRNOG00000025378_019i"	"ENSRNOG00000025378"	"Ccdc155"	335	0	0	0	0	4	0	0	0	0	0	1	0	0	0	0	0	0	0	0	0	0	0	0	0	0	0	0	0	0	0	0	0	0	0	0	0	0	0	0	0	3	0	0	0	0	0	1	0	0	0	NA	NA	0.8	0	0.00238805970149254	0	0	0	0	0	0.6	0	-Inf	FALSE	FALSE
"1"	101194380	101198650	"-"	"ENSRNOG00000025378_020i"	"ENSRNOG00000025378"	"Ccdc155"	4270	2	4	4	1	4	0	0	6	0	0	4	1	4	0	0	0	0	0	0	0	0	0	0	0	0	0	0	0	0	0	0	0	0	0	0	0	0	0	4	0	1	0	0	0	0	0	0	0	0	0	NA	NA	3	1.2	0.000702576112412178	0.000281030444964871	0.8	0	0	0	1	0	-0.916290731874155	FALSE	FALSE
"1"	101205811	101208708	"-"	"ENSRNOG00000020686_001i"	"ENSRNOG00000020686"	"Dkkl1"	2897	0	0	0	0	0	0	0	0	0	5	2	0	0	0	0	0	0	0	0	0	0	0	0	0	0	0	0	0	0	0	0	0	0	0	0	0	0	0	0	0	0	0	0	0	0	0	0	0	0	0	NA	NA	0	1	0	0.000345184673800483	0	0	0	0	0	0	Inf	FALSE	FALSE
"1"	101208799	101208923	"-"	"ENSRNOG00000020686_002i"	"ENSRNOG00000020686"	"Dkkl1"	124	0	0	0	0	0	0	0	0	0	0	0	0	0	0	0	0	0	0	0	0	0	0	0	0	0	0	0	0	0	0	0	0	0	0	0	0	0	0	0	0	0	0	0	0	0	0	0	0	0	0	NA	NA	0	0	0	0	0	0	0	0	0	0	NA	FALSE	FALSE
"1"	101209065	101209972	"-"	"ENSRNOG00000020686_003i"	"ENSRNOG00000020686"	"Dkkl1"	907	0	0	0	0	0	0	0	0	0	0	0	0	0	0	0	0	1	0	0	0	0	0	0	0	0	0	0	0	0	0	0	0	0	0	0	0	0	0	0	0	0	0	0	0	0	0	0	0	0	0	NA	NA	0	0	0	0	0.2	0	0	0	0	0	NA	FALSE	FALSE
"1"	101210143	101210321	"-"	"ENSRNOG00000020686_004i"	"ENSRNOG00000020686"	"Dkkl1"	178	0	0	0	0	0	0	0	0	0	0	0	0	0	0	0	0	0	0	0	0	0	0	0	0	0	0	0	0	0	0	0	0	0	0	0	0	0	0	0	0	0	0	0	0	0	0	0	0	0	0	NA	NA	0	0	0	0	0	0	0	0	0	0	NA	FALSE	FALSE
"1"	101213847	101214592	"+"	"ENSRNOG00000020695_001i"	"ENSRNOG00000020695"	"Tead2"	745	0	0	0	0	0	0	0	0	0	0	4	1	0	0	0	0	0	0	0	0	0	0	0	0	0	0	0	0	0	0	0	0	0	0	0	0	0	0	0	0	0	0	0	0	0	0	0	0	0	0	NA	NA	0	0	0	0	0	0	0	0	0	0	NA	FALSE	FALSE
"1"	101214703	101215163	"+"	"ENSRNOG00000020695_002i"	"ENSRNOG00000020695"	"Tead2"	460	0	0	0	2	0	0	0	0	1	0	1	2	0	0	0	0	0	2	0	0	0	0	0	0	0	0	0	0	0	0	0	0	0	0	0	0	0	0	0	0	0	0	0	0	0	0	1	0	0	0	NA	NA	0.4	0.2	0.000869565217391304	0.000434782608695652	0	0.4	0	0	0	0	-0.693147180559945	FALSE	FALSE
"1"	101215402	101215998	"+"	"ENSRNOG00000020695_003i"	"ENSRNOG00000020695"	"Tead2"	596	0	0	0	0	0	0	0	0	0	0	0	0	5	0	0	0	0	0	0	0	0	0	3	1	0	0	0	0	0	0	0	0	0	0	0	0	0	0	0	0	0	0	0	0	0	0	0	0	0	0	NA	NA	0	0	0	0	1	0	0	0	0	0	NA	FALSE	FALSE
"1"	101216064	101217155	"+"	"ENSRNOG00000020695_004i"	"ENSRNOG00000020695"	"Tead2"	1091	0	0	0	0	1	0	0	0	0	0	1	0	0	0	0	0	0	0	0	0	0	0	4	0	0	0	0	0	0	0	0	0	0	0	0	0	0	0	0	0	0	0	0	0	0	0	0	0	0	0	NA	NA	0.2	0	0.000183318056828598	0	0	0	0	0	0	0	-Inf	FALSE	FALSE
"1"	101217219	101218528	"+"	"ENSRNOG00000020695_005i"	"ENSRNOG00000020695"	"Tead2"	1309	0	0	3	0	1	0	0	0	0	0	0	0	1	0	0	0	0	0	0	0	0	0	11	0	0	0	0	0	0	0	0	0	0	0	0	0	0	0	0	0	0	0	0	0	0	0	0	0	0	0	NA	NA	0.8	0	0.000611153552330023	0	0.2	0	0	0	0	0	-Inf	FALSE	FALSE
"1"	101218637	101218734	"+"	"ENSRNOG00000020695_006i"	"ENSRNOG00000020695"	"Tead2"	97	0	0	0	0	0	0	0	0	0	0	0	0	0	13	2	1	1	5	9	0	0	0	11	0	0	0	0	0	0	0	0	0	0	0	0	0	0	0	0	0	0	0	0	0	0	0	0	0	0	0	NA	NA	0	0	0	0	3.4	2.8	0	0	0	0	NA	FALSE	FALSE
"1"	101218794	101221589	"+"	"ENSRNOG00000020695_007i"	"ENSRNOG00000020695"	"Tead2"	2795	3	0	0	0	0	0	0	0	0	0	0	0	4	17	3	4	2	20	12	0	7	1	0	0	0	0	0	0	0	0	0	0	0	0	0	0	0	0	0	0	0	0	0	0	0	0	0	0	0	0	NA	NA	0.6	0	0.000214669051878354	0	6	8	0	0	0	0	-Inf	FALSE	FALSE
"1"	101221655	101223349	"+"	"ENSRNOG00000020695_008i"	"ENSRNOG00000020695"	"Tead2"	1694	0	0	0	0	0	0	0	0	0	6	1	0	1	4	0	2	4	7	0	1	11	15	0	0	0	0	0	0	0	0	0	0	0	2	0	0	0	0	0	0	0	0	0	0	0	0	0	0	0	0	NA	NA	0	1.2	0	0.000708382526564345	2.2	6.8	0	0.4	0	0	Inf	FALSE	FALSE
"1"	101223493	101226220	"+"	"ENSRNOG00000020695_009i"	"ENSRNOG00000020695"	"Tead2"	2727	1	3	0	0	0	0	0	0	0	0	0	0	1	0	0	0	0	0	0	0	0	0	5	1	0	0	0	0	0	0	0	0	0	0	0	0	0	0	0	0	0	0	0	0	0	0	0	0	0	0	NA	NA	0.8	0	0.000293362669600293	0	0.2	0	0	0	0	0	-Inf	FALSE	FALSE
"1"	101226395	101228185	"+"	"ENSRNOG00000020695_010i"	"ENSRNOG00000020695"	"Tead2"	1790	0	0	0	0	0	0	0	0	0	0	1	0	0	0	0	0	2	8	0	1	2	0	14	0	0	0	0	0	0	0	0	0	0	0	0	0	0	0	0	0	0	0	0	0	0	0	0	0	0	0	NA	NA	0	0	0	0	0.4	2.2	0	0	0	0	NA	FALSE	FALSE
"1"	101228348	101229005	"+"	"ENSRNOG00000020695_011i"	"ENSRNOG00000020695"	"Tead2"	657	0	0	0	0	0	0	0	0	0	1	0	0	1	1	0	2	1	0	0	0	0	5	4	0	0	0	0	0	0	0	0	0	0	0	0	0	0	0	0	0	0	0	0	0	0	0	0	0	0	0	NA	NA	0	0.2	0	0.00030441400304414	1	1	0	0	0	0	Inf	FALSE	FALSE
"1"	101229159	101229682	"+"	"ENSRNOG00000020695_012i"	"ENSRNOG00000020695"	"Tead2"	523	0	0	0	0	0	0	0	0	0	0	3	0	0	0	1	0	0	1	2	0	0	0	4	0	0	0	0	0	0	0	0	0	0	0	0	0	0	0	0	0	0	0	0	0	0	0	0	0	0	0	NA	NA	0	0	0	0	0.2	0.6	0	0	0	0	NA	FALSE	FALSE
"1"	101230810	101231482	"-"	"ENSRNOG00000020699_001i"	"ENSRNOG00000020699"	"Cd37"	672	0	0	0	0	1	0	0	0	0	0	0	0	0	0	0	0	0	0	0	0	0	0	0	0	0	0	0	0	0	0	0	0	0	0	0	0	0	0	0	0	0	0	0	0	0	0	0	0	0	0	NA	NA	0.2	0	0.000297619047619048	0	0	0	0	0	0	0	-Inf	FALSE	FALSE
"1"	101231567	101232223	"-"	"ENSRNOG00000020699_002i"	"ENSRNOG00000020699"	"Cd37"	656	0	0	0	0	0	0	0	0	0	0	0	0	0	0	0	0	0	0	0	0	0	0	0	0	0	0	0	0	0	0	0	0	0	0	0	0	0	0	0	0	0	0	0	0	0	0	0	0	0	0	NA	NA	0	0	0	0	0	0	0	0	0	0	NA	FALSE	FALSE
"1"	101232461	101232856	"-"	"ENSRNOG00000020699_003i"	"ENSRNOG00000020699"	"Cd37"	395	0	0	0	0	0	0	0	0	0	0	0	0	0	0	0	0	0	0	0	0	0	0	0	0	0	0	0	0	0	0	0	0	0	0	0	0	0	0	0	0	0	0	0	0	0	0	0	0	0	0	NA	NA	0	0	0	0	0	0	0	0	0	0	NA	FALSE	FALSE
"1"	101232962	101233854	"-"	"ENSRNOG00000020699_004i"	"ENSRNOG00000020699"	"Cd37"	892	0	0	0	0	0	0	0	0	0	0	0	0	0	0	0	0	0	0	0	0	0	0	1	0	0	0	0	0	0	0	0	0	0	0	0	0	0	0	0	0	0	0	0	0	0	0	0	0	0	0	NA	NA	0	0	0	0	0	0	0	0	0	0	NA	FALSE	FALSE
"1"	101233930	101234010	"-"	"ENSRNOG00000020699_005i"	"ENSRNOG00000020699"	"Cd37"	80	0	0	0	0	0	0	0	0	0	0	0	0	0	0	0	0	0	0	0	0	0	0	0	0	0	0	0	0	0	0	0	0	0	0	0	0	0	0	0	0	0	0	0	0	0	0	0	0	0	0	NA	NA	0	0	0	0	0	0	0	0	0	0	NA	FALSE	FALSE
"1"	101234136	101235346	"-"	"ENSRNOG00000020699_006i"	"ENSRNOG00000020699"	"Cd37"	1210	0	0	0	0	0	0	0	0	0	4	0	0	0	0	0	0	0	0	0	0	0	0	1	0	0	0	0	0	0	0	0	0	0	0	0	0	0	0	0	0	0	0	0	0	0	0	0	0	0	0	NA	NA	0	0.8	0	0.000661157024793388	0	0	0	0	0	0	Inf	FALSE	FALSE
"1"	101235420	101235507	"-"	"ENSRNOG00000020699_007i"	"ENSRNOG00000020699"	"Cd37"	87	0	0	0	0	0	0	0	0	0	0	0	0	0	0	0	0	0	0	0	0	0	0	1	0	0	0	0	0	0	0	0	0	0	0	0	0	0	0	0	0	0	0	0	0	0	0	0	0	0	0	NA	NA	0	0	0	0	0	0	0	0	0	0	NA	FALSE	FALSE
"1"	101235583	101235806	"-"	"ENSRNOG00000020699_008i"	"ENSRNOG00000020699"	"Cd37"	223	0	0	0	0	0	0	0	0	0	0	0	2	0	0	0	0	0	0	0	0	0	0	0	0	0	0	0	0	0	0	0	0	0	0	0	0	0	0	0	0	0	0	0	0	0	0	0	0	0	0	NA	NA	0	0	0	0	0	0	0	0	0	0	NA	FALSE	FALSE
"1"	101249958	101250324	"+"	"ENSRNOG00000025220_001i"	"ENSRNOG00000025220"	"Slc6a16"	366	0	0	0	0	0	0	0	0	0	0	0	0	0	0	0	0	0	0	0	0	0	0	0	0	0	0	0	0	0	0	0	0	0	0	0	0	0	0	0	0	0	0	0	0	0	0	0	0	0	0	NA	NA	0	0	0	0	0	0	0	0	0	0	NA	FALSE	FALSE
"1"	101250483	101250661	"+"	"ENSRNOG00000025220_002i"	"ENSRNOG00000025220"	"Slc6a16"	178	0	0	0	0	0	0	0	0	0	0	0	0	0	0	0	0	0	0	0	0	0	0	0	0	0	0	0	0	0	0	0	0	0	0	0	0	0	0	0	0	0	0	0	0	0	0	0	0	0	0	NA	NA	0	0	0	0	0	0	0	0	0	0	NA	FALSE	FALSE
"1"	101250789	101250942	"+"	"ENSRNOG00000025220_003i"	"ENSRNOG00000025220"	"Slc6a16"	153	0	0	0	0	0	0	0	0	0	0	0	0	0	0	0	0	0	0	0	0	0	0	0	0	0	0	0	0	0	0	0	0	0	0	0	0	0	0	0	0	0	0	0	0	0	0	0	0	0	0	NA	NA	0	0	0	0	0	0	0	0	0	0	NA	FALSE	FALSE
"1"	101251119	101251301	"+"	"ENSRNOG00000025220_004i"	"ENSRNOG00000025220"	"Slc6a16"	182	0	0	0	0	0	0	0	0	0	0	0	0	0	0	0	0	0	0	0	0	0	0	0	0	0	0	0	0	0	0	0	0	0	0	0	0	0	0	0	0	0	0	0	0	0	0	0	0	0	0	NA	NA	0	0	0	0	0	0	0	0	0	0	NA	FALSE	FALSE
"1"	101251416	101251553	"+"	"ENSRNOG00000025220_005i"	"ENSRNOG00000025220"	"Slc6a16"	137	0	0	0	0	0	0	0	0	0	0	0	0	0	0	0	0	0	0	0	0	0	0	0	0	0	0	0	0	0	0	0	0	0	0	0	0	0	0	0	0	0	0	0	0	0	0	0	0	0	0	NA	NA	0	0	0	0	0	0	0	0	0	0	NA	FALSE	FALSE
"1"	101251796	101256838	"+"	"ENSRNOG00000025220_006i"	"ENSRNOG00000025220"	"Slc6a16"	5042	0	0	0	0	0	0	0	0	0	5	0	0	0	0	0	0	0	0	0	0	0	0	0	0	0	0	0	0	0	0	0	0	0	0	0	0	0	0	0	0	0	0	0	0	0	0	0	0	0	0	NA	NA	0	1	0	0.000198333994446648	0	0	0	0	0	0	Inf	FALSE	FALSE
"1"	101257023	101257259	"+"	"ENSRNOG00000025220_007i"	"ENSRNOG00000025220"	"Slc6a16"	236	0	0	0	0	0	0	0	0	0	0	0	0	0	0	0	0	0	0	0	0	0	0	0	0	0	0	0	0	0	0	0	0	0	0	0	0	0	0	0	0	0	0	0	0	0	0	0	0	0	0	NA	NA	0	0	0	0	0	0	0	0	0	0	NA	FALSE	FALSE
"1"	101257462	101257587	"+"	"ENSRNOG00000025220_008i"	"ENSRNOG00000025220"	"Slc6a16"	125	0	0	0	0	0	0	0	0	0	0	0	0	0	0	0	0	0	0	0	0	0	0	0	0	0	0	0	0	0	0	0	0	0	0	0	0	0	0	0	0	0	0	0	0	0	0	0	0	0	0	NA	NA	0	0	0	0	0	0	0	0	0	0	NA	FALSE	FALSE
"1"	101257748	101260704	"+"	"ENSRNOG00000025220_009i"	"ENSRNOG00000025220"	"Slc6a16"	2956	0	0	0	0	3	0	0	0	0	0	0	0	0	0	0	0	0	0	0	0	0	0	0	0	0	0	0	0	0	0	0	0	0	0	0	0	0	0	0	0	0	0	0	0	0	0	0	0	0	0	NA	NA	0.6	0	0.00020297699594046	0	0	0	0	0	0	0	-Inf	FALSE	FALSE
"1"	101260868	101261029	"+"	"ENSRNOG00000025220_010i"	"ENSRNOG00000025220"	"Slc6a16"	161	0	0	0	0	0	0	0	0	0	0	0	0	0	0	0	0	0	0	0	0	0	0	0	0	0	0	0	0	0	0	0	0	0	0	0	0	0	0	0	0	0	0	0	0	0	0	0	0	0	0	NA	NA	0	0	0	0	0	0	0	0	0	0	NA	FALSE	FALSE
"1"	101265830	101268046	"+"	"ENSRNOG00000037219_001i"	"ENSRNOG00000037219"	"RGD1562492"	2216	0	0	0	0	0	0	0	0	0	0	0	0	0	0	0	0	0	0	0	0	0	0	0	0	0	0	0	0	0	0	0	0	0	0	0	0	0	0	0	0	0	0	0	0	0	0	0	0	0	0	NA	NA	0	0	0	0	0	0	0	0	0	0	NA	FALSE	FALSE
"1"	101268335	101268453	"+"	"ENSRNOG00000037219_002i"	"ENSRNOG00000037219"	"RGD1562492"	118	0	0	0	0	0	0	0	0	0	0	0	0	0	0	0	0	0	0	0	0	0	0	0	0	0	0	0	0	0	0	0	0	0	0	0	0	0	0	0	0	0	0	0	0	0	0	0	0	0	0	NA	NA	0	0	0	0	0	0	0	0	0	0	NA	FALSE	FALSE
"1"	101268612	101268693	"+"	"ENSRNOG00000037219_003i"	"ENSRNOG00000037219"	"RGD1562492"	81	0	0	0	0	0	0	0	0	0	0	0	0	0	0	0	0	0	0	0	0	0	0	0	0	0	0	0	0	0	0	0	0	0	0	0	0	0	0	0	0	0	0	0	0	0	0	0	0	0	0	NA	NA	0	0	0	0	0	0	0	0	0	0	NA	FALSE	FALSE
"1"	101268821	101268915	"+"	"ENSRNOG00000037219_004i"	"ENSRNOG00000037219"	"RGD1562492"	94	0	0	0	0	0	0	0	0	0	0	0	0	0	0	0	0	0	0	0	0	0	0	0	0	0	0	0	0	0	0	0	0	0	0	0	0	0	0	0	0	0	0	0	0	0	0	0	0	0	0	NA	NA	0	0	0	0	0	0	0	0	0	0	NA	FALSE	FALSE
"1"	101269095	101270761	"+"	"ENSRNOG00000037219_005i"	"ENSRNOG00000037219"	"RGD1562492"	1666	0	0	0	0	0	0	0	0	0	0	4	0	0	0	0	0	0	0	0	0	0	0	0	0	0	0	0	0	0	0	0	0	0	0	0	0	0	0	0	0	0	0	0	0	0	0	0	0	0	0	NA	NA	0	0	0	0	0	0	0	0	0	0	NA	FALSE	FALSE
"1"	101270873	101271017	"+"	"ENSRNOG00000037219_006i"	"ENSRNOG00000037219"	"RGD1562492"	144	0	0	0	0	0	0	0	0	0	0	0	0	0	0	0	0	0	0	0	0	0	0	0	0	0	0	0	0	0	0	0	0	0	0	0	0	0	0	0	0	0	0	0	0	0	0	0	0	0	0	NA	NA	0	0	0	0	0	0	0	0	0	0	NA	FALSE	FALSE
"1"	101271130	101271231	"+"	"ENSRNOG00000037219_007i"	"ENSRNOG00000037219"	"RGD1562492"	101	0	0	0	0	0	0	0	0	0	0	0	0	0	0	0	0	0	0	0	0	0	0	0	0	0	0	0	0	0	0	0	0	0	0	0	0	0	0	0	0	0	0	0	0	0	0	0	0	0	0	NA	NA	0	0	0	0	0	0	0	0	0	0	NA	FALSE	FALSE
"1"	101271260	101274664	"+"	"ENSRNOG00000037219_008i"	"ENSRNOG00000037219"	"RGD1562492"	3404	0	0	0	0	0	0	0	0	0	2	0	0	0	0	0	0	0	0	0	0	0	0	0	0	0	0	0	0	0	0	0	0	0	0	0	0	0	0	0	0	0	0	0	0	0	0	0	0	0	0	NA	NA	0	0.4	0	0.000117508813160987	0	0	0	0	0	0	Inf	FALSE	FALSE
"1"	101274852	101275131	"+"	"ENSRNOG00000037219_009i"	"ENSRNOG00000037219"	"RGD1562492"	279	0	0	0	0	0	0	0	0	0	0	0	0	0	0	0	0	0	0	0	0	0	0	0	0	0	0	0	0	0	0	0	0	0	0	0	0	0	0	0	0	0	0	0	0	0	0	0	0	0	0	NA	NA	0	0	0	0	0	0	0	0	0	0	NA	FALSE	FALSE
"1"	101275334	101275450	"+"	"ENSRNOG00000037219_010i"	"ENSRNOG00000037219"	"RGD1562492"	116	0	0	0	0	0	0	0	0	0	0	0	0	0	0	0	0	0	0	0	0	0	0	0	0	0	0	0	0	0	0	0	0	0	0	0	0	0	0	0	0	0	0	0	0	0	0	0	0	0	0	NA	NA	0	0	0	0	0	0	0	0	0	0	NA	FALSE	FALSE
"1"	101275611	101275917	"+"	"ENSRNOG00000037219_011i"	"ENSRNOG00000037219"	"RGD1562492"	306	0	0	0	0	0	0	0	0	0	0	0	0	0	0	0	0	0	0	0	0	0	0	0	0	0	0	0	0	0	0	0	0	0	0	0	0	0	0	0	0	0	0	0	0	0	0	0	0	0	0	NA	NA	0	0	0	0	0	0	0	0	0	0	NA	FALSE	FALSE
"1"	101276084	101276293	"+"	"ENSRNOG00000037219_012i"	"ENSRNOG00000037219"	"RGD1562492"	209	0	0	0	0	0	0	0	0	0	0	0	0	0	0	0	0	0	0	0	0	0	0	0	0	0	0	0	0	0	0	0	0	0	0	0	0	0	0	0	0	0	0	0	0	0	0	0	0	0	0	NA	NA	0	0	0	0	0	0	0	0	0	0	NA	FALSE	FALSE
"1"	101293835	101294766	"-"	"ENSRNOG00000020714_001i"	"ENSRNOG00000020714"	"Trpm4"	931	1	3	0	4	1	0	0	0	0	0	5	0	0	0	0	0	1	0	4	0	0	0	0	0	0	2	0	0	0	0	0	0	0	0	0	0	0	0	0	0	0	0	0	0	0	0	0	0	0	0	NA	NA	1.8	0	0.00193340494092374	0	0.2	0.8	0.4	0	0	0	-Inf	FALSE	FALSE
"1"	101294873	101294962	"-"	"ENSRNOG00000020714_002i"	"ENSRNOG00000020714"	"Trpm4"	89	0	0	0	0	0	0	0	0	0	0	0	0	2	2	0	1	0	0	0	0	0	0	2	0	0	0	0	0	0	0	0	0	0	0	0	0	0	0	0	0	0	0	0	0	0	0	0	0	0	0	NA	NA	0	0	0	0	1	0	0	0	0	0	NA	FALSE	FALSE
"1"	101295036	101295116	"-"	"ENSRNOG00000020714_003i"	"ENSRNOG00000020714"	"Trpm4"	80	0	0	0	1	0	0	0	0	0	0	0	0	0	0	0	0	0	0	0	0	0	3	0	0	0	0	0	0	0	0	0	0	0	0	0	0	0	0	0	1	0	0	0	0	0	0	0	0	0	0	NA	NA	0.2	0	0.0025	0	0	0.6	0	0	0.2	0	-Inf	FALSE	FALSE
"1"	101295250	101295438	"-"	"ENSRNOG00000020714_004i"	"ENSRNOG00000020714"	"Trpm4"	188	0	0	0	0	0	0	0	0	0	0	0	0	0	0	0	0	0	0	0	0	0	0	0	0	0	0	0	0	0	0	0	0	0	0	0	0	0	0	0	0	0	0	0	0	0	0	0	0	0	0	NA	NA	0	0	0	0	0	0	0	0	0	0	NA	FALSE	FALSE
"1"	101295636	101298657	"-"	"ENSRNOG00000020714_005i"	"ENSRNOG00000020714"	"Trpm4"	3021	1	0	0	1	0	0	0	0	0	8	0	0	0	0	5	0	0	0	1	0	0	0	3	0	0	0	0	0	0	0	0	0	0	0	0	0	0	0	0	0	0	0	0	0	0	0	0	0	0	0	NA	NA	0.4	1.6	0.000132406487917908	0.000529625951671632	1	0.2	0	0	0	0	1.38629436111989	FALSE	FALSE
"1"	101298836	101298956	"-"	"ENSRNOG00000020714_006i"	"ENSRNOG00000020714"	"Trpm4"	120	0	0	0	0	0	0	0	0	0	0	0	0	0	0	0	0	0	0	0	0	0	0	0	0	0	0	0	0	0	0	0	0	0	0	0	0	0	0	0	0	0	0	0	0	0	0	0	0	0	0	NA	NA	0	0	0	0	0	0	0	0	0	0	NA	FALSE	FALSE
"1"	101299132	101299447	"-"	"ENSRNOG00000020714_007i"	"ENSRNOG00000020714"	"Trpm4"	315	0	0	0	0	0	0	0	0	0	0	0	0	0	0	0	1	0	0	5	0	0	0	3	0	0	0	0	0	0	0	0	0	0	0	0	0	0	0	0	0	0	0	0	0	0	0	0	0	0	0	NA	NA	0	0	0	0	0.2	1	0	0	0	0	NA	FALSE	FALSE
"1"	101299581	101300617	"-"	"ENSRNOG00000020714_008i"	"ENSRNOG00000020714"	"Trpm4"	1036	0	0	0	1	0	0	0	0	0	4	0	0	0	0	0	0	0	0	0	0	0	0	1	0	0	0	0	0	0	0	0	0	0	0	0	0	0	0	0	0	0	0	0	0	0	0	0	0	0	0	NA	NA	0.2	0.8	0.000193050193050193	0.000772200772200772	0	0	0	0	0	0	1.38629436111989	FALSE	FALSE
"1"	101301041	101305082	"-"	"ENSRNOG00000020714_009i"	"ENSRNOG00000020714"	"Trpm4"	4041	1	0	5	0	2	0	0	0	0	0	9	0	2	1	0	0	0	0	0	0	0	0	3	0	0	0	0	0	0	0	0	0	0	0	0	0	0	0	0	0	0	0	0	0	0	0	0	0	0	0	NA	NA	1.6	0	0.000395941598614204	0	0.6	0	0	0	0	0	-Inf	FALSE	FALSE
"1"	101305161	101305469	"-"	"ENSRNOG00000020714_010i"	"ENSRNOG00000020714"	"Trpm4"	308	2	0	0	3	2	0	0	0	0	0	10	0	0	0	0	0	0	0	0	0	0	0	0	0	0	0	0	0	0	0	0	0	0	0	0	0	2	0	0	2	0	0	0	0	0	0	0	0	0	0	NA	NA	1.4	0	0.00454545454545455	0	0	0	0	0	0.8	0	-Inf	FALSE	FALSE
"1"	101305583	101307350	"-"	"ENSRNOG00000020714_011i"	"ENSRNOG00000020714"	"Trpm4"	1767	0	0	0	0	0	0	0	0	0	0	0	0	0	0	0	1	0	0	0	0	0	0	4	0	0	0	0	0	0	0	0	0	0	0	0	0	0	0	0	0	0	0	0	0	0	0	0	0	0	0	NA	NA	0	0	0	0	0.2	0	0	0	0	0	NA	FALSE	FALSE
"1"	101307497	101307573	"-"	"ENSRNOG00000020714_012i"	"ENSRNOG00000020714"	"Trpm4"	76	0	0	0	0	0	0	0	0	0	0	0	0	0	0	0	0	2	0	0	0	0	0	7	0	0	0	0	0	0	0	0	0	0	0	0	0	0	0	0	0	0	0	0	0	0	0	0	0	0	0	NA	NA	0	0	0	0	0.4	0	0	0	0	0	NA	FALSE	FALSE
"1"	101307704	101308401	"-"	"ENSRNOG00000020714_013i"	"ENSRNOG00000020714"	"Trpm4"	697	1	2	1	0	0	0	0	0	0	0	0	0	0	0	0	0	1	0	0	0	0	0	1	0	0	0	0	0	0	0	0	0	0	0	0	0	0	0	0	0	0	0	0	0	0	0	0	0	0	0	NA	NA	0.8	0	0.00114777618364419	0	0.2	0	0	0	0	0	-Inf	FALSE	FALSE
"1"	101308531	101308689	"-"	"ENSRNOG00000020714_014i"	"ENSRNOG00000020714"	"Trpm4"	158	0	0	0	0	0	0	0	0	0	0	0	0	0	0	2	0	0	0	0	0	0	0	2	0	0	0	0	0	0	0	0	0	0	0	0	0	0	0	0	0	0	0	0	0	0	0	0	0	0	0	NA	NA	0	0	0	0	0.4	0	0	0	0	0	NA	FALSE	FALSE
"1"	101309032	101309662	"-"	"ENSRNOG00000020714_015i"	"ENSRNOG00000020714"	"Trpm4"	630	2	0	0	6	4	0	0	0	0	0	2	0	0	0	1	0	3	0	0	0	0	0	1	0	0	0	0	0	0	0	0	0	0	0	0	0	0	0	0	0	0	0	0	0	0	0	0	0	0	0	NA	NA	2.4	0	0.00380952380952381	0	0.8	0	0	0	0	0	-Inf	FALSE	FALSE
"1"	101309776	101311666	"-"	"ENSRNOG00000020714_016i"	"ENSRNOG00000020714"	"Trpm4"	1890	0	2	0	5	11	0	0	0	0	3	0	0	0	0	0	3	0	0	0	0	0	0	1	0	0	0	0	0	0	0	0	0	0	0	0	0	0	0	0	0	0	0	0	0	0	0	0	0	0	0	NA	NA	3.6	0.6	0.0019047619047619	0.000317460317460317	0.6	0	0	0	0	0	-1.79175946922805	FALSE	FALSE
"1"	101311767	101311878	"-"	"ENSRNOG00000020714_017i"	"ENSRNOG00000020714"	"Trpm4"	111	0	0	0	0	0	0	0	0	0	0	0	0	0	0	0	0	0	0	0	0	0	0	1	0	0	0	0	0	0	0	0	0	0	0	0	0	0	0	0	0	0	0	0	0	0	0	0	0	0	0	NA	NA	0	0	0	0	0	0	0	0	0	0	NA	FALSE	FALSE
"1"	101312071	101312198	"-"	"ENSRNOG00000020714_018i"	"ENSRNOG00000020714"	"Trpm4"	127	0	0	0	0	0	0	0	0	0	0	0	0	1	1	0	0	1	0	0	0	0	0	6	0	0	0	0	0	0	0	0	0	0	0	0	0	0	0	0	0	0	0	0	0	0	0	0	0	0	0	NA	NA	0	0	0	0	0.6	0	0	0	0	0	NA	FALSE	FALSE
"1"	101312261	101316232	"-"	"ENSRNOG00000020714_019i"	"ENSRNOG00000020714"	"Trpm4"	3971	0	1	1	7	6	0	0	0	0	1	0	0	1	0	0	3	0	0	0	1	2	3	0	0	0	0	0	0	0	0	0	0	0	0	0	0	0	0	0	0	3	0	0	0	0	0	0	0	0	0	NA	NA	3	0.2	0.000755477209770839	5.03651473180559e-05	0.8	1.2	0	0	0.6	0	-2.70805020110221	FALSE	FALSE
"1"	101316417	101316636	"-"	"ENSRNOG00000020714_020i"	"ENSRNOG00000020714"	"Trpm4"	219	1	0	0	0	0	0	0	0	0	0	0	0	0	0	0	0	1	0	0	0	0	0	0	0	0	0	0	0	0	0	0	0	0	0	0	0	1	0	0	0	0	0	0	0	0	0	0	0	0	0	NA	NA	0.2	0	0.00091324200913242	0	0.2	0	0	0	0.2	0	-Inf	FALSE	FALSE
"1"	101316801	101316929	"-"	"ENSRNOG00000020714_021i"	"ENSRNOG00000020714"	"Trpm4"	128	3	0	0	0	0	0	0	0	0	0	0	0	0	0	0	0	0	0	0	0	0	0	0	0	3	0	0	0	0	0	0	0	0	0	0	0	0	0	0	0	0	0	0	0	0	0	0	0	0	0	NA	NA	0.6	0	0.0046875	0	0	0	0.6	0	0	0	-Inf	FALSE	FALSE
"1"	101317111	101317379	"-"	"ENSRNOG00000020714_022i"	"ENSRNOG00000020714"	"Trpm4"	268	0	0	0	3	2	0	5	0	0	0	1	0	0	0	0	0	0	0	0	0	0	0	0	0	0	0	0	0	0	0	0	0	0	0	0	0	0	0	0	0	0	0	0	0	0	0	0	0	0	0	NA	NA	1	1	0.00373134328358209	0.00373134328358209	0	0	0	0	0	0	0	FALSE	FALSE
"1"	101317555	101322813	"-"	"ENSRNOG00000020714_023i"	"ENSRNOG00000020714"	"Trpm4"	5258	2	5	2	10	15	0	0	0	3	1	6	0	0	0	0	0	0	0	0	0	0	0	2	0	0	1	0	0	0	0	0	0	0	0	0	0	0	0	0	0	0	0	0	0	0	0	0	0	0	0	NA	NA	6.8	0.8	0.00129326740205401	0.000152149106124002	0	0	0.2	0	0	0	-2.14006616349627	FALSE	FALSE
"1"	101322885	101323117	"-"	"ENSRNOG00000020714_024i"	"ENSRNOG00000020714"	"Trpm4"	232	0	0	0	1	0	0	0	0	0	0	0	1	0	0	0	0	0	0	0	0	0	0	0	0	0	0	0	0	0	0	0	0	0	0	0	0	0	0	0	1	0	0	0	0	0	0	0	0	0	0	NA	NA	0.2	0	0.000862068965517241	0	0	0	0	0	0.2	0	-Inf	FALSE	FALSE
"1"	101326855	101326933	"+"	"ENSRNOG00000020719_001i"	"ENSRNOG00000020719"	"Hrc"	78	0	0	0	0	0	0	0	0	0	0	0	0	0	0	0	0	0	0	0	0	0	0	0	0	0	0	0	0	0	0	0	0	0	0	0	0	0	0	0	0	0	0	0	0	0	0	0	0	0	0	NA	NA	0	0	0	0	0	0	0	0	0	0	NA	FALSE	FALSE
"1"	101327005	101327374	"+"	"ENSRNOG00000020719_002i"	"ENSRNOG00000020719"	"Hrc"	369	0	0	0	0	0	0	0	0	0	0	0	0	0	0	0	0	0	0	0	0	0	0	0	0	0	0	0	0	0	0	0	0	0	0	0	0	0	0	0	0	0	0	0	0	0	0	0	0	0	0	NA	NA	0	0	0	0	0	0	0	0	0	0	NA	FALSE	FALSE
"1"	101327444	101327640	"+"	"ENSRNOG00000020719_003i"	"ENSRNOG00000020719"	"Hrc"	196	0	0	0	0	1	0	0	0	0	0	0	0	0	0	0	0	0	0	0	0	0	0	0	0	0	0	0	0	0	0	0	0	0	0	0	0	0	0	0	0	0	0	0	0	0	0	0	0	0	0	NA	NA	0.2	0	0.00102040816326531	0	0	0	0	0	0	0	-Inf	FALSE	FALSE
"1"	101327696	101328100	"+"	"ENSRNOG00000020719_004i"	"ENSRNOG00000020719"	"Hrc"	404	0	0	0	0	0	0	0	0	0	0	0	0	0	0	0	0	0	0	0	0	0	0	0	0	0	0	0	0	0	0	0	0	0	0	0	0	0	0	0	0	0	0	0	0	0	0	0	0	0	0	NA	NA	0	0	0	0	0	0	0	0	0	0	NA	FALSE	FALSE
"1"	101328138	101328326	"+"	"ENSRNOG00000020719_005i"	"ENSRNOG00000020719"	"Hrc"	188	0	0	0	0	0	0	0	0	0	0	0	0	0	0	0	0	0	0	0	0	0	0	1	0	0	0	0	0	0	0	0	0	0	0	0	0	0	0	0	0	0	0	0	0	0	0	0	0	0	0	NA	NA	0	0	0	0	0	0	0	0	0	0	NA	FALSE	FALSE
"1"	101329447	101329610	"-"	"ENSRNOG00000020731_001i"	"ENSRNOG00000020731"	"Ppfia3"	163	6	7	2	5	6	8	9	12	20	31	49	0	21	41	38	40	80	169	166	154	274	352	153	0	5	0	0	2	1	0	2	7	2	13	13	0	1	6	2	3	4	8	7	2	13	4	8	0	0	0	NA	NA	5.2	16	0.0319018404907975	0.098159509202454	44	223	1.6	4.8	3.2	6.8	1.1239300966524	TRUE	TRUE
"1"	101329683	101330016	"-"	"ENSRNOG00000020731_002i"	"ENSRNOG00000020731"	"Ppfia3"	333	0	0	0	6	0	8	0	0	11	0	3	0	19	31	16	10	17	110	76	111	81	73	102	5	0	0	0	0	0	8	0	0	0	0	0	0	0	0	0	0	0	0	0	0	0	0	0	0	0	0	NA	NA	1.2	3.8	0.0036036036036036	0.0114114114114114	18.6	90.2	0	1.6	0	0	1.15267950993839	FALSE	FALSE
"1"	101330189	101330373	"-"	"ENSRNOG00000020731_003i"	"ENSRNOG00000020731"	"Ppfia3"	184	0	0	4	0	0	0	0	0	0	0	0	0	43	107	63	8	13	206	215	321	27	30	139	6	0	0	0	0	0	0	0	0	0	0	0	0	0	0	4	0	0	0	0	0	0	0	0	0	0	0	NA	NA	0.8	0	0.00434782608695652	0	46.8	159.8	0	0	0.8	0	-Inf	FALSE	FALSE
"1"	101330443	101330523	"-"	"ENSRNOG00000020731_004i"	"ENSRNOG00000020731"	"Ppfia3"	80	0	2	0	1	4	0	0	0	0	0	6	0	18	16	16	62	44	64	23	69	205	137	214	1	0	2	0	1	3	0	0	0	0	0	0	0	0	0	0	0	1	0	0	0	0	0	0	0	0	0	NA	NA	1.4	0	0.0175	0	31.2	99.6	1.2	0	0.2	0	-Inf	FALSE	FALSE
"1"	101330700	101331126	"-"	"ENSRNOG00000020731_005i"	"ENSRNOG00000020731"	"Ppfia3"	426	7	0	3	1	3	0	0	0	0	0	0	0	0	4	9	6	7	22	2	11	29	17	102	3	0	0	0	0	1	0	0	0	0	0	0	0	3	0	0	0	1	0	0	0	0	0	0	0	0	0	NA	NA	2.8	0	0.00657276995305164	0	5.2	16.2	0.2	0	0.8	0	-Inf	FALSE	FALSE
"1"	101331225	101331738	"-"	"ENSRNOG00000020731_006i"	"ENSRNOG00000020731"	"Ppfia3"	513	0	4	1	0	0	0	0	0	0	0	4	0	15	26	25	28	18	78	52	92	54	61	95	0	0	0	0	0	0	0	0	0	0	0	0	0	0	0	0	0	0	0	0	0	0	0	0	0	0	0	NA	NA	1	0	0.00194931773879142	0	22.4	67.4	0	0	0	0	-Inf	FALSE	FALSE
"1"	101331915	101332922	"-"	"ENSRNOG00000020731_007i"	"ENSRNOG00000020731"	"Ppfia3"	1007	5	12	8	2	8	0	0	0	0	0	18	0	0	4	9	22	13	27	18	36	74	59	115	2	1	0	1	0	1	0	0	0	0	0	0	0	0	2	0	0	0	0	0	0	0	0	0	0	0	0	NA	NA	7	0	0.00695134061569017	0	9.6	42.8	0.6	0	0.4	0	-Inf	TRUE	FALSE
"1"	101332950	101333110	"-"	"ENSRNOG00000020731_008i"	"ENSRNOG00000020731"	"Ppfia3"	160	0	0	1	9	10	0	0	0	0	0	0	0	1	2	6	20	18	34	31	63	76	47	135	3	0	0	0	1	0	0	0	0	0	0	0	0	0	0	1	0	0	0	0	0	0	0	0	0	0	0	NA	NA	4	0	0.025	0	9.4	50.2	0.2	0	0.2	0	-Inf	FALSE	FALSE
"1"	101333174	101335638	"-"	"ENSRNOG00000020731_009i"	"ENSRNOG00000020731"	"Ppfia3"	2464	0	5	10	32	32	0	5	3	17	14	10	0	33	33	40	27	38	137	154	194	138	179	74	2	0	0	1	2	3	0	0	0	0	0	0	0	0	0	0	0	0	0	0	0	0	0	0	0	0	0	NA	NA	15.8	7.8	0.00641233766233766	0.00316558441558442	34.2	160.4	1.2	0	0	0	-0.705886206337375	FALSE	FALSE
"1"	101335840	101336312	"-"	"ENSRNOG00000020731_010i"	"ENSRNOG00000020731"	"Ppfia3"	472	0	1	5	16	11	0	0	0	1	2	0	0	12	15	15	4	18	28	69	84	62	44	112	3	0	0	3	2	1	0	0	0	0	1	0	0	0	0	0	3	0	0	0	0	0	0	0	0	0	0	NA	NA	6.6	0.6	0.0139830508474576	0.00127118644067797	12.8	57.4	1.2	0.2	0.6	0	-2.39789527279837	FALSE	FALSE
"1"	101336395	101336599	"-"	"ENSRNOG00000020731_011i"	"ENSRNOG00000020731"	"Ppfia3"	204	0	0	3	0	1	0	0	0	0	0	0	0	3	9	8	10	10	11	9	21	84	56	139	0	0	0	0	0	1	0	0	0	0	0	0	0	0	0	3	0	0	0	0	0	0	0	0	0	0	0	NA	NA	0.8	0	0.00392156862745098	0	8	36.2	0.2	0	0.6	0	-Inf	FALSE	FALSE
"1"	101336694	101337309	"-"	"ENSRNOG00000020731_012i"	"ENSRNOG00000020731"	"Ppfia3"	615	3	0	0	2	2	0	0	0	0	0	0	0	20	20	20	17	5	107	85	63	26	33	35	5	0	0	0	0	0	0	0	0	0	0	0	0	0	0	0	0	1	0	0	0	0	0	0	0	0	0	NA	NA	1.4	0	0.00227642276422764	0	16.4	62.8	0	0	0.2	0	-Inf	FALSE	FALSE
"1"	101337438	101337528	"-"	"ENSRNOG00000020731_013i"	"ENSRNOG00000020731"	"Ppfia3"	90	0	0	0	0	0	0	0	0	0	0	0	0	54	45	42	27	22	132	151	162	182	149	138	3	0	0	0	0	0	0	0	0	0	0	0	0	0	0	0	0	0	0	0	0	0	0	0	0	0	0	NA	NA	0	0	0	0	38	155.2	0	0	0	0	NA	FALSE	FALSE
"1"	101337693	101339433	"-"	"ENSRNOG00000020731_014i"	"ENSRNOG00000020731"	"Ppfia3"	1740	7	3	15	10	10	0	0	0	0	2	0	0	62	119	103	275	221	400	388	422	2099	1993	56	3	0	1	0	0	1	0	0	0	0	0	0	0	0	0	0	3	1	0	0	0	0	0	0	0	0	0	NA	NA	9	0.4	0.00517241379310345	0.000229885057471264	156	1060.4	0.4	0	0.8	0	-3.11351530921037	TRUE	FALSE
"1"	101339654	101341734	"-"	"ENSRNOG00000020731_015i"	"ENSRNOG00000020731"	"Ppfia3"	2080	2	1	2	4	9	0	0	0	0	0	4	0	12	12	13	7	10	57	31	74	31	25	86	4	0	0	0	0	1	0	0	0	0	0	0	0	0	0	0	0	4	0	0	0	0	0	0	0	0	0	NA	NA	3.6	0	0.00173076923076923	0	10.8	43.6	0.2	0	0.8	0	-Inf	FALSE	FALSE
"1"	101341923	101343634	"-"	"ENSRNOG00000020731_016i"	"ENSRNOG00000020731"	"Ppfia3"	1711	0	3	0	5	5	0	0	0	1	0	6	0	5	20	13	12	23	92	84	68	128	131	124	4	0	0	0	0	1	0	0	0	0	0	0	0	0	3	0	3	0	0	0	0	0	0	0	0	0	0	NA	NA	2.6	0.2	0.00151957919345412	0.000116890707188778	14.6	100.6	0.2	0	1.2	0	-2.56494935746154	FALSE	FALSE
"1"	101343780	101345016	"-"	"ENSRNOG00000020731_017i"	"ENSRNOG00000020731"	"Ppfia3"	1236	0	1	5	15	9	0	0	0	0	0	0	0	17	8	9	6	14	19	40	24	38	32	80	0	0	0	0	2	0	0	0	0	0	0	0	0	0	0	0	0	0	0	0	0	0	0	0	0	0	0	NA	NA	6	0	0.00485436893203883	0	10.8	30.6	0.4	0	0	0	-Inf	FALSE	FALSE
"1"	101345094	101345185	"-"	"ENSRNOG00000020731_018i"	"ENSRNOG00000020731"	"Ppfia3"	91	1	0	0	2	1	0	0	0	0	0	0	0	15	15	11	17	14	67	71	99	68	63	62	0	1	0	0	0	1	0	0	0	0	0	0	0	1	0	0	2	0	0	0	0	0	0	0	0	0	0	NA	NA	0.8	0	0.00879120879120879	0	14.4	73.6	0.4	0	0.6	0	-Inf	FALSE	FALSE
"1"	101345249	101345466	"-"	"ENSRNOG00000020731_019i"	"ENSRNOG00000020731"	"Ppfia3"	217	3	0	0	3	4	0	0	0	0	0	0	0	6	8	7	0	0	28	12	61	6	7	42	1	0	0	0	2	0	0	0	0	0	0	0	0	3	0	0	0	0	0	0	0	0	0	0	0	0	0	NA	NA	2	0	0.00921658986175115	0	4.2	22.8	0.4	0	0.6	0	-Inf	FALSE	FALSE
"1"	101345599	101346463	"-"	"ENSRNOG00000020731_020i"	"ENSRNOG00000020731"	"Ppfia3"	864	0	0	0	0	0	0	0	0	0	0	0	0	15	19	26	6	18	104	33	90	30	50	13	2	0	0	0	0	0	0	0	0	0	0	0	0	0	0	0	0	0	0	0	0	0	0	0	0	0	0	NA	NA	0	0	0	0	16.8	61.4	0	0	0	0	NA	FALSE	FALSE
"1"	101346548	101346636	"-"	"ENSRNOG00000020731_021i"	"ENSRNOG00000020731"	"Ppfia3"	88	0	1	1	3	0	0	0	0	0	0	1	0	27	26	22	3	15	82	90	92	39	37	28	1	0	1	0	3	0	0	0	0	0	0	0	0	0	1	1	0	0	0	0	0	0	0	0	0	0	0	NA	NA	1	0	0.0113636363636364	0	18.6	68	0.8	0	0.4	0	-Inf	FALSE	FALSE
"1"	101346772	101346867	"-"	"ENSRNOG00000020731_022i"	"ENSRNOG00000020731"	"Ppfia3"	95	0	0	0	0	0	0	0	0	0	0	0	0	2	18	7	3	3	12	23	29	26	33	63	3	0	0	0	0	0	0	0	0	0	0	0	0	0	0	0	0	0	0	0	0	0	0	0	0	0	0	NA	NA	0	0	0	0	6.6	24.6	0	0	0	0	NA	FALSE	FALSE
"1"	101347015	101348104	"-"	"ENSRNOG00000020731_023i"	"ENSRNOG00000020731"	"Ppfia3"	1089	18	6	16	25	21	4	0	0	0	0	8	1	20	21	21	6	8	87	46	63	46	48	55	3	3	0	5	5	1	0	0	0	0	0	0	0	1	0	0	6	1	0	0	0	0	0	0	0	0	0	NA	NA	17.2	0.8	0.0157943067033976	0.000734618916437098	15.2	58	2.8	0	1.6	0	-3.06805293513362	TRUE	FALSE
"1"	101348327	101349220	"-"	"ENSRNOG00000020731_024i"	"ENSRNOG00000020731"	"Ppfia3"	893	8	13	1	8	16	0	7	4	0	1	2	1	14	14	24	9	22	38	58	34	56	65	80	8	0	0	0	0	0	0	0	0	0	0	0	0	0	2	0	0	0	0	0	0	0	0	0	0	0	0	NA	NA	9.2	2.4	0.0103023516237402	0.00268756998880179	16.6	50.2	0	0	0.4	0	-1.34373474670109	TRUE	FALSE
"1"	101349296	101349461	"-"	"ENSRNOG00000020731_025i"	"ENSRNOG00000020731"	"Ppfia3"	165	0	0	0	0	0	0	0	0	0	0	2	0	9	31	20	8	11	54	34	79	47	58	76	10	0	0	0	0	0	0	0	0	0	0	0	0	0	0	0	0	0	0	0	0	0	0	0	0	0	0	NA	NA	0	0	0	0	15.8	54.4	0	0	0	0	NA	FALSE	FALSE
"1"	101349537	101350237	"-"	"ENSRNOG00000020731_026i"	"ENSRNOG00000020731"	"Ppfia3"	700	7	5	1	7	1	0	0	0	0	2	1	0	6	14	14	5	6	68	67	54	28	40	32	30	2	3	0	0	0	0	0	0	0	0	0	0	5	0	0	0	0	0	0	0	0	0	0	0	0	0	NA	NA	4.2	0.4	0.006	0.000571428571428571	9	51.4	1	0	1	0	-2.35137525716348	TRUE	FALSE
"1"	101350403	101350701	"-"	"ENSRNOG00000020731_027i"	"ENSRNOG00000020731"	"Ppfia3"	298	1	9	2	27	14	0	0	0	0	0	3	0	8	11	10	11	13	26	34	22	73	55	149	8	0	0	0	0	4	0	0	0	0	0	0	0	0	2	0	0	0	0	0	0	0	0	0	0	0	0	NA	NA	10.6	0	0.0355704697986577	0	10.6	42	0.8	0	0.4	0	-Inf	TRUE	FALSE
"1"	101350804	101351739	"-"	"ENSRNOG00000020731_028i"	"ENSRNOG00000020731"	"Ppfia3"	935	0	0	2	2	0	0	0	0	0	0	1	0	11	19	23	13	10	23	45	78	11	24	72	16	0	0	0	0	0	0	0	0	0	0	0	0	0	0	0	0	0	0	0	0	0	0	0	0	0	0	NA	NA	0.8	0	0.000855614973262032	0	15.2	36.2	0	0	0	0	-Inf	FALSE	FALSE
"1"	101358418	101358720	"-"	"ENSRNOG00000020746_001i"	"ENSRNOG00000020746"	"Lin7b"	302	26	41	13	186	261	13	49	27	169	199	183	2	35	59	46	39	51	33	31	31	30	29	4	0	7	11	5	28	35	12	5	4	12	15	18	1	10	22	4	19	33	0	20	12	10	33	8	0	0	0	NA	NA	105.4	91.4	0.349006622516556	0.302649006622517	46	30.8	17.2	9.6	17.6	15	-0.142517157647158	TRUE	TRUE
"1"	101358885	101359536	"-"	"ENSRNOG00000020746_002i"	"ENSRNOG00000020746"	"Lin7b"	651	5	16	5	14	18	5	0	6	0	3	150	3	3	1	3	0	3	0	2	6	0	3	25	0	0	1	1	0	1	0	0	0	0	0	5	1	3	4	4	1	6	0	0	4	0	0	2	0	0	0	NA	NA	11.6	2.8	0.0178187403993856	0.0043010752688172	2	2.2	0.6	0	3.6	0.8	-1.42138568093116	TRUE	FALSE
"1"	101359747	101360326	"-"	"ENSRNOG00000020746_003i"	"ENSRNOG00000020746"	"Lin7b"	579	0	3	9	15	28	0	0	0	0	4	6	1	5	6	2	1	9	13	3	8	0	5	23	5	0	0	0	2	7	0	0	0	0	0	0	0	0	0	2	0	6	0	0	0	0	4	0	0	0	0	NA	NA	11	0.8	0.0189982728842832	0.00138169257340242	4.6	5.8	1.8	0	1.6	0.8	-2.62103882411258	FALSE	FALSE
"1"	101360399	101360539	"-"	"ENSRNOG00000020746_004i"	"ENSRNOG00000020746"	"Lin7b"	140	0	1	0	0	1	0	0	0	0	0	16	1	1	2	4	2	8	0	4	0	4	6	19	4	0	0	0	0	0	0	0	0	0	0	0	0	0	0	0	0	1	0	0	0	0	0	2	0	0	0	NA	NA	0.4	0	0.00285714285714286	0	3.4	2.8	0	0	0.2	0	-Inf	FALSE	FALSE
"1"	101360659	101360934	"-"	"ENSRNOG00000020746_005i"	"ENSRNOG00000020746"	"Lin7b"	275	1	2	6	3	1	0	7	2	16	0	278	24	1	0	0	0	0	0	0	0	0	0	22	0	0	0	0	0	0	0	0	0	0	0	2	0	1	2	6	3	1	0	7	2	16	0	34	0	0	0	NA	NA	2.6	5	0.00945454545454546	0.0181818181818182	0.2	0	0	0	2.6	5	0.653926467406664	TRUE	FALSE
"1"	101368295	101368372	"-"	"ENSRNOG00000020763_001i"	"ENSRNOG00000020763"	"Snrnp70"	77	0	0	0	1	1	0	0	0	0	0	56	16	16	23	12	14	23	6	2	4	3	2	0	0	0	0	0	1	1	0	0	0	0	0	0	0	0	0	0	0	0	0	0	0	0	0	1	0	0	0	NA	NA	0.4	0	0.00519480519480519	0	17.6	3.4	0.4	0	0	0	-Inf	FALSE	FALSE
"1"	101368461	101371724	"-"	"ENSRNOG00000020763_002i"	"ENSRNOG00000020763"	"Snrnp70"	3263	5	20	3	25	38	0	0	0	0	0	116	3	4	7	5	7	13	0	0	3	0	1	16	8	0	0	0	2	0	0	0	0	0	0	3	0	0	0	0	0	0	0	0	0	0	0	0	0	0	0	NA	NA	18.2	0	0.00557768924302789	0	7.2	0.8	0.4	0	0	0	-Inf	TRUE	FALSE
"1"	101371827	101373538	"-"	"ENSRNOG00000020763_003i"	"ENSRNOG00000020763"	"Snrnp70"	1711	196	234	175	744	921	15	10	1	14	30	2793	6	3	11	11	5	9	0	14	8	2	26	0	25	12	14	3	5	6	0	0	0	0	0	25	0	15	12	6	11	12	0	0	0	0	0	34	0	0	0	14	NA	454	14	0.265341905318527	0.00818234950321449	7.8	10	8	0	11.2	0	-3.47903986842609	TRUE	TRUE
"1"	101374202	101375152	"-"	"ENSRNOG00000020763_004i"	"ENSRNOG00000020763"	"Snrnp70"	950	50	55	42	359	273	0	0	2	5	6	102	0	24	46	36	27	38	9	13	8	2	17	41	28	29	28	34	289	197	0	0	0	4	5	27	0	0	0	0	1	1	0	0	0	0	0	13	0	0	0	NA	NA	155.8	2.6	0.164	0.00273684210526316	34.2	9.8	115.4	1.8	0.4	0	-4.09306168840921	TRUE	FALSE
"1"	101375235	101379369	"-"	"ENSRNOG00000020763_005i"	"ENSRNOG00000020763"	"Snrnp70"	4134	86	94	101	222	291	0	0	0	3	6	410	0	37	33	33	44	22	14	7	5	8	19	89	1	0	2	1	1	3	0	0	0	0	0	1	0	1	4	0	5	22	0	0	0	0	0	4	0	0	0	NA	NA	158.8	1.8	0.0384131591678762	0.000435413642960813	33.8	10.6	1.4	0	6.4	0	-4.47985888391092	TRUE	FALSE
"1"	101379433	101379554	"-"	"ENSRNOG00000020763_006i"	"ENSRNOG00000020763"	"Snrnp70"	121	0	1	6	2	2	0	0	0	0	0	1	0	24	33	33	10	16	2	0	3	2	4	103	17	0	1	4	2	2	0	0	0	0	0	0	0	0	0	2	0	0	0	0	0	0	0	0	0	0	0	NA	NA	2.2	0	0.0181818181818182	0	23.2	2.2	1.8	0	0.4	0	-Inf	FALSE	FALSE
"1"	101379620	101384513	"-"	"ENSRNOG00000020763_007i"	"ENSRNOG00000020763"	"Snrnp70"	4893	51	66	94	133	148	0	0	0	0	17	96	0	24	32	34	108	98	0	0	3	21	7	78	9	2	0	1	4	2	0	0	0	0	3	0	0	0	2	7	1	7	0	0	0	0	0	0	0	0	0	NA	NA	98.4	3.4	0.020110361741263	0.000694870222767219	59.2	6.2	1.8	0.6	3.4	0	-3.36526537243609	TRUE	FALSE
"1"	101384569	101384741	"-"	"ENSRNOG00000020763_008i"	"ENSRNOG00000020763"	"Snrnp70"	172	0	0	0	2	5	0	0	0	0	0	0	0	64	63	76	49	41	9	4	2	10	0	61	8	0	0	0	1	4	0	0	0	0	0	0	0	0	0	0	1	1	0	0	0	0	0	0	0	0	0	NA	NA	1.4	0	0.00813953488372093	0	58.6	5	1	0	0.4	0	-Inf	FALSE	FALSE
"1"	101384805	101387111	"-"	"ENSRNOG00000020763_009i"	"ENSRNOG00000020763"	"Snrnp70"	2306	8	14	20	24	21	0	0	0	0	1	2	0	57	94	82	18	24	14	6	2	19	2	84	18	0	0	0	1	0	0	0	0	0	0	0	0	0	1	2	3	2	0	0	0	0	0	0	0	0	0	NA	NA	17.4	0.2	0.00754553339115351	8.67302688638335e-05	55	8.6	0.2	0	1.6	0	-4.46590811865458	TRUE	FALSE
"1"	101387269	101387534	"-"	"ENSRNOG00000020763_010i"	"ENSRNOG00000020763"	"Snrnp70"	265	0	4	9	12	6	0	0	0	0	1	5	0	154	237	286	294	307	51	41	17	51	52	43	0	0	4	4	2	2	0	0	0	0	1	0	0	0	0	0	10	4	0	0	0	0	0	0	0	0	0	NA	NA	6.2	0.2	0.0233962264150943	0.000754716981132076	255.6	42.4	2.4	0.2	2.8	0	-3.43398720448515	FALSE	FALSE
"1"	101387616	101387945	"-"	"ENSRNOG00000020763_011i"	"ENSRNOG00000020763"	"Snrnp70"	329	1	4	16	23	26	0	0	0	1	1	25	1	104	186	219	251	276	54	27	20	44	40	28	0	0	3	0	0	0	0	0	0	0	0	0	0	0	0	0	1	0	0	0	0	0	0	17	0	0	0	NA	NA	14	0.4	0.0425531914893617	0.00121580547112462	207.2	37	0.6	0	0.2	0	-3.55534806148941	TRUE	FALSE
"1"	101398900	101400800	"+"	"ENSRNOG00000020779_001i"	"ENSRNOG00000020779"	"Kcna7"	1900	0	0	0	0	2	0	0	0	0	0	0	0	0	0	0	0	0	0	0	0	0	0	0	0	0	0	0	0	0	0	0	0	0	0	0	0	0	0	0	0	0	0	0	0	0	0	0	0	0	0	NA	NA	0.4	0	0.000210526315789474	0	0	0	0	0	0	0	-Inf	FALSE	FALSE
"1"	101405387	101406303	"+"	"ENSRNOG00000020783_001i"	"ENSRNOG00000020783"	"Ntf4"	916	0	0	0	0	0	0	0	0	0	0	0	0	0	0	0	0	0	0	0	0	0	0	0	0	0	0	0	0	0	0	0	0	0	0	0	0	0	0	0	0	0	0	0	0	0	0	0	0	0	0	NA	NA	0	0	0	0	0	0	0	0	0	0	NA	FALSE	FALSE
"1"	101406425	101407013	"+"	"ENSRNOG00000020783_002i"	"ENSRNOG00000020783"	"Ntf4"	588	0	0	0	0	0	0	0	0	0	0	0	0	0	0	0	0	0	0	0	0	0	0	0	0	0	0	0	0	0	0	0	0	0	0	0	0	0	0	0	0	0	0	0	0	0	0	0	0	0	0	NA	NA	0	0	0	0	0	0	0	0	0	0	NA	FALSE	FALSE
"1"	101410188	101410495	"+"	"ENSRNOG00000047040_001i"	"ENSRNOG00000047040"	"Lhb"	307	0	0	0	1	0	0	0	0	0	0	0	0	0	3	0	1	2	0	0	0	0	0	0	0	0	0	0	0	0	0	0	0	0	0	0	0	0	0	0	0	0	0	0	0	0	0	0	0	0	0	NA	NA	0.2	0	0.000651465798045603	0	1.2	0	0	0	0	0	-Inf	FALSE	FALSE
"1"	101410697	101410790	"+"	"ENSRNOG00000047040_002i"	"ENSRNOG00000047040"	"Lhb"	93	0	0	0	0	0	0	0	0	0	0	0	0	1	0	0	0	0	0	0	0	0	0	0	0	0	0	0	0	0	0	0	0	0	0	0	0	0	0	0	0	0	0	0	0	0	0	0	0	0	0	NA	NA	0	0	0	0	0.2	0	0	0	0	0	NA	FALSE	FALSE
"1"	101410956	101411497	"+"	"ENSRNOG00000047040_003i"	"ENSRNOG00000047040"	"Lhb"	541	0	0	0	0	0	0	0	0	0	0	0	0	0	3	0	0	0	0	0	0	0	0	0	0	0	0	0	0	0	0	0	0	0	0	0	0	0	0	0	0	0	0	0	0	0	0	0	0	0	0	NA	NA	0	0	0	0	0.6	0	0	0	0	0	NA	FALSE	FALSE
"1"	101411617	101411828	"+"	"ENSRNOG00000047040_004i"	"ENSRNOG00000047040"	"Lhb"	211	0	0	0	0	0	0	0	3	0	0	0	0	1	0	0	0	0	0	0	0	0	0	0	0	0	0	0	0	0	0	0	0	0	0	0	0	0	0	0	0	0	0	0	0	0	0	0	0	0	0	NA	NA	0	0.6	0	0.0028436018957346	0.2	0	0	0	0	0	Inf	FALSE	FALSE
"1"	101413175	101413402	"+"	"ENSRNOG00000047040_008i"	"ENSRNOG00000047040"	"Lhb"	227	0	0	0	0	0	0	0	0	0	0	0	0	0	0	0	0	1	0	4	0	0	0	0	0	0	0	0	0	0	0	0	0	0	0	0	0	0	0	0	0	0	0	0	0	0	0	0	0	0	0	NA	NA	0	0	0	0	0.2	0.8	0	0	0	0	NA	FALSE	FALSE
"1"	101413876	101413962	"-"	"ENSRNOG00000020793_001i"	"ENSRNOG00000020793"	"Ruvbl2"	86	3	0	4	0	3	0	0	0	0	0	0	0	38	39	38	39	47	13	21	11	15	18	48	4	0	0	4	0	0	0	0	0	0	0	0	0	3	0	4	0	3	0	0	0	0	0	0	0	0	0	NA	NA	2	0	0.0232558139534884	0	40.2	15.6	0.8	0	2	0	-Inf	FALSE	FALSE
"1"	101414078	101414257	"-"	"ENSRNOG00000020793_002i"	"ENSRNOG00000020793"	"Ruvbl2"	179	0	1	0	2	2	0	0	0	0	0	1	0	20	36	29	79	100	29	3	7	7	15	20	2	0	0	0	0	0	0	0	0	0	0	0	0	0	1	0	2	2	0	0	0	0	0	0	0	0	0	NA	NA	1	0	0.00558659217877095	0	52.8	12.2	0	0	1	0	-Inf	FALSE	FALSE
"1"	101414388	101414551	"-"	"ENSRNOG00000020793_003i"	"ENSRNOG00000020793"	"Ruvbl2"	163	0	7	4	8	15	2	0	0	0	0	0	0	24	29	18	15	28	4	23	8	0	9	89	0	0	0	3	2	8	0	0	0	0	0	0	0	0	7	1	2	7	2	0	0	0	0	0	0	0	0	NA	NA	6.8	0.4	0.0417177914110429	0.00245398773006135	22.8	8.8	2.6	0	3.4	0.4	-2.83321334405622	FALSE	FALSE
"1"	101414672	101416047	"-"	"ENSRNOG00000020793_004i"	"ENSRNOG00000020793"	"Ruvbl2"	1375	6	11	4	7	18	0	0	0	0	1	0	0	39	53	26	18	29	21	7	7	5	24	117	5	0	0	0	0	1	0	0	0	0	0	0	0	0	2	0	0	0	0	0	0	0	0	0	0	0	0	NA	NA	9.2	0.2	0.00669090909090909	0.000145454545454545	33	12.8	0.2	0	0.4	0	-3.8286413964891	TRUE	FALSE
"1"	101416167	101416250	"-"	"ENSRNOG00000020793_005i"	"ENSRNOG00000020793"	"Ruvbl2"	83	0	0	3	0	2	0	0	0	0	0	0	0	14	20	22	11	20	0	9	2	2	7	30	0	0	0	0	0	2	0	0	0	0	0	0	0	0	0	3	0	0	0	0	0	0	0	0	0	0	0	NA	NA	1	0	0.0120481927710843	0	17.4	4	0.4	0	0.6	0	-Inf	FALSE	FALSE
"1"	101416346	101416671	"-"	"ENSRNOG00000020793_006i"	"ENSRNOG00000020793"	"Ruvbl2"	325	3	4	1	13	14	0	0	0	0	0	0	0	3	11	8	0	2	0	0	0	2	11	40	5	3	0	0	3	2	0	0	0	0	0	0	0	0	0	0	0	2	0	0	0	0	0	0	0	0	0	NA	NA	7	0	0.0215384615384615	0	4.8	2.6	1.6	0	0.4	0	-Inf	TRUE	FALSE
"1"	101416796	101416935	"-"	"ENSRNOG00000020793_007i"	"ENSRNOG00000020793"	"Ruvbl2"	139	1	6	0	1	1	0	0	0	0	0	0	0	21	26	25	5	12	12	9	2	0	0	88	3	1	2	0	0	1	0	0	0	0	0	0	0	0	4	0	1	0	0	0	0	0	0	0	0	0	0	NA	NA	1.8	0	0.0129496402877698	0	17.8	4.6	0.8	0	1	0	-Inf	FALSE	FALSE
"1"	101417030	101417105	"-"	"ENSRNOG00000020793_008i"	"ENSRNOG00000020793"	"Ruvbl2"	75	2	3	0	1	1	0	0	0	0	0	1	0	19	16	13	5	5	0	2	7	0	5	58	2	2	0	0	0	0	0	0	0	0	0	0	0	2	3	0	1	1	0	0	0	0	0	0	0	0	0	NA	NA	1.4	0	0.0186666666666667	0	11.6	2.8	0.4	0	1.4	0	-Inf	FALSE	FALSE
"1"	101417213	101420741	"-"	"ENSRNOG00000020793_009i"	"ENSRNOG00000020793"	"Ruvbl2"	3528	8	11	19	27	46	0	0	0	2	2	6	0	12	16	6	21	11	19	4	3	0	3	34	3	0	0	0	0	0	0	0	0	0	0	0	0	0	0	0	0	5	0	0	0	0	0	0	0	0	0	NA	NA	22.2	0.8	0.00629251700680272	0.000226757369614512	13.2	5.8	0	0	1	0	-3.32323584019244	TRUE	FALSE
"1"	101420809	101420910	"-"	"ENSRNOG00000020793_010i"	"ENSRNOG00000020793"	"Ruvbl2"	101	0	0	0	0	1	0	0	0	0	0	0	0	10	20	9	8	2	25	7	0	0	1	12	4	0	0	0	0	0	0	0	0	0	0	0	0	0	0	0	0	1	0	0	0	0	0	0	0	0	0	NA	NA	0.2	0	0.00198019801980198	0	9.8	6.6	0	0	0.2	0	-Inf	FALSE	FALSE
"1"	101421041	101421894	"-"	"ENSRNOG00000020793_011i"	"ENSRNOG00000020793"	"Ruvbl2"	853	6	3	6	9	2	0	0	0	0	0	0	0	12	15	21	9	7	6	0	2	0	0	76	0	0	0	0	0	0	0	0	0	0	0	0	0	0	0	0	0	0	0	0	0	0	0	0	0	0	0	NA	NA	5.2	0	0.00609613130128957	0	12.8	1.6	0	0	0	0	-Inf	TRUE	FALSE
"1"	101422037	101422324	"-"	"ENSRNOG00000020793_012i"	"ENSRNOG00000020793"	"Ruvbl2"	287	4	0	1	0	6	0	0	0	0	0	1	0	20	22	21	5	5	17	23	5	0	0	16	9	0	0	0	0	2	0	0	0	0	0	0	0	0	0	0	0	0	0	0	0	0	0	0	0	0	0	NA	NA	2.2	0	0.00766550522648084	0	14.6	9	0.4	0	0	0	-Inf	FALSE	FALSE
"1"	101422381	101423605	"-"	"ENSRNOG00000020793_013i"	"ENSRNOG00000020793"	"Ruvbl2"	1224	3	0	7	5	15	0	0	0	0	3	1	0	0	9	2	2	1	1	3	2	0	0	97	2	0	0	0	0	1	0	0	0	0	0	0	0	0	0	0	0	0	0	0	0	0	0	0	0	0	0	NA	NA	6	0.6	0.00490196078431373	0.000490196078431373	2.8	1.2	0.2	0	0	0	-2.30258509299405	FALSE	FALSE
"1"	101423661	101426606	"-"	"ENSRNOG00000020793_014i"	"ENSRNOG00000020793"	"Ruvbl2"	2945	8	5	14	7	9	0	0	0	0	0	14	1	0	6	0	0	0	0	0	0	0	0	109	11	0	0	0	0	0	0	0	0	0	0	0	0	0	1	0	0	0	0	0	0	0	0	0	0	0	0	NA	NA	8.6	0	0.00292020373514431	0	1.2	0	0	0	0.2	0	-Inf	FALSE	FALSE
"1"	101427528	101428892	"+"	"ENSRNOG00000020812_001i"	"ENSRNOG00000020812"	"Gys1"	1364	11	5	9	16	7	0	0	0	0	0	0	0	7	9	10	2	5	1	10	1	0	1	6	0	0	0	0	0	1	0	0	0	0	0	0	0	0	0	2	0	0	0	0	0	0	0	0	0	0	0	NA	NA	9.6	0	0.00703812316715543	0	6.6	2.6	0.2	0	0.4	0	-Inf	TRUE	FALSE
"1"	101429075	101430606	"+"	"ENSRNOG00000020812_002i"	"ENSRNOG00000020812"	"Gys1"	1531	0	4	1	5	10	0	0	0	0	0	4	0	0	2	5	0	3	0	0	0	3	0	15	0	0	0	0	0	0	0	0	0	0	0	0	0	0	0	0	0	0	0	0	0	0	0	0	0	0	0	NA	NA	4	0	0.00261267145656434	0	2	0.6	0	0	0	0	-Inf	FALSE	FALSE
"1"	101430799	101432025	"+"	"ENSRNOG00000020812_003i"	"ENSRNOG00000020812"	"Gys1"	1226	4	0	7	0	6	0	0	1	0	3	5	0	5	6	5	3	6	3	0	6	0	0	6	4	1	0	0	0	0	0	0	0	0	0	0	0	0	0	2	0	0	0	0	0	0	0	0	0	0	0	NA	NA	3.4	0.8	0.00277324632952692	0.00065252854812398	5	1.8	0.2	0	0.4	0	-1.44691898293633	FALSE	FALSE
"1"	101432212	101432429	"+"	"ENSRNOG00000020812_004i"	"ENSRNOG00000020812"	"Gys1"	217	0	0	0	1	2	0	0	0	0	0	0	0	3	18	14	10	8	8	15	4	1	2	14	2	0	0	0	0	0	0	0	0	0	0	0	0	0	0	0	0	1	0	0	0	0	0	0	0	0	0	NA	NA	0.6	0	0.00276497695852535	0	10.6	6	0	0	0.2	0	-Inf	FALSE	FALSE
"1"	101432575	101434129	"+"	"ENSRNOG00000020812_005i"	"ENSRNOG00000020812"	"Gys1"	1554	17	7	5	19	31	0	0	0	0	4	4	0	10	12	5	6	6	1	0	0	0	0	2	2	5	0	0	0	0	0	0	0	0	0	0	0	0	1	0	0	0	0	0	0	0	0	0	0	0	0	NA	NA	15.8	0.8	0.0101673101673102	0.000514800514800515	7.8	0.2	1	0	0.2	0	-2.98315349134713	TRUE	FALSE
"1"	101434248	101434590	"+"	"ENSRNOG00000020812_006i"	"ENSRNOG00000020812"	"Gys1"	342	0	0	0	1	0	0	0	0	0	0	0	0	3	9	15	2	0	0	0	0	0	5	7	0	0	0	0	0	0	0	0	0	0	0	0	0	0	0	0	1	0	0	0	0	0	0	0	0	0	0	NA	NA	0.2	0	0.000584795321637427	0	5.8	1	0	0	0.2	0	-Inf	FALSE	FALSE
"1"	101434712	101435241	"+"	"ENSRNOG00000020812_007i"	"ENSRNOG00000020812"	"Gys1"	529	5	1	0	2	3	0	0	0	0	0	0	0	7	8	4	3	3	0	0	0	0	0	8	0	0	0	0	0	0	0	0	0	0	0	0	0	0	0	0	1	0	0	0	0	0	0	0	0	0	0	NA	NA	2.2	0	0.00415879017013233	0	5	0	0	0	0.2	0	-Inf	FALSE	FALSE
"1"	101435349	101436319	"+"	"ENSRNOG00000020812_008i"	"ENSRNOG00000020812"	"Gys1"	970	8	19	12	18	23	0	0	0	0	0	6	0	6	5	8	2	1	0	0	5	0	0	4	0	1	3	0	1	4	0	0	0	0	0	1	0	0	0	0	0	4	0	0	0	0	0	0	0	0	0	NA	NA	16	0	0.0164948453608247	0	4.4	1	1.8	0	0.8	0	-Inf	TRUE	FALSE
"1"	101436380	101436465	"+"	"ENSRNOG00000020812_009i"	"ENSRNOG00000020812"	"Gys1"	85	0	0	0	3	1	0	0	0	0	0	0	0	11	3	9	4	5	0	4	1	0	0	12	1	0	0	0	0	1	0	0	0	0	0	0	0	0	0	0	3	0	0	0	0	0	0	0	0	0	0	NA	NA	0.8	0	0.00941176470588235	0	6.4	1	0.2	0	0.6	0	-Inf	FALSE	FALSE
"1"	101436545	101439318	"+"	"ENSRNOG00000020812_010i"	"ENSRNOG00000020812"	"Gys1"	2773	5	5	11	3	19	0	0	0	0	8	4	0	8	31	39	13	39	3	1	12	13	5	12	4	0	2	1	0	0	0	0	0	0	0	0	0	1	0	0	0	2	0	0	0	0	4	0	0	0	0	NA	NA	8.6	1.6	0.00310133429498738	0.000576992426974396	26	6.8	0.6	0	0.6	0.8	-1.68175857401373	FALSE	FALSE
"1"	101439433	101439675	"+"	"ENSRNOG00000020812_011i"	"ENSRNOG00000020812"	"Gys1"	242	0	0	0	0	1	0	0	0	0	0	0	0	6	16	6	17	12	11	0	0	0	2	16	0	0	0	0	0	0	0	0	0	0	0	0	0	0	0	0	0	0	0	0	0	0	0	0	0	0	0	NA	NA	0.2	0	0.000826446280991736	0	11.4	2.6	0	0	0	0	-Inf	FALSE	FALSE
"1"	101439803	101442399	"+"	"ENSRNOG00000020812_012i"	"ENSRNOG00000020812"	"Gys1"	2596	0	5	5	11	15	3	0	0	0	12	3	0	14	17	8	18	46	2	3	4	3	17	7	0	0	0	0	0	0	0	0	0	0	0	0	0	0	0	0	0	0	0	0	0	0	0	1	0	0	0	NA	NA	7.2	3	0.00277349768875193	0.00115562403697997	20.6	5.8	0	0	0	0	-0.8754687373539	FALSE	FALSE
"1"	101442496	101442575	"+"	"ENSRNOG00000020812_013i"	"ENSRNOG00000020812"	"Gys1"	79	0	0	0	0	0	0	0	0	0	0	0	0	8	17	8	17	15	0	0	6	0	4	23	1	0	0	0	0	0	0	0	0	0	0	0	0	0	0	0	0	0	0	0	0	0	0	0	0	0	0	NA	NA	0	0	0	0	13	2	0	0	0	0	NA	FALSE	FALSE
"1"	101442740	101445286	"+"	"ENSRNOG00000020812_014i"	"ENSRNOG00000020812"	"Gys1"	2546	17	9	12	2	11	0	0	0	0	0	15	0	9	26	8	29	35	33	4	4	8	3	31	0	0	3	0	0	0	0	0	0	0	0	0	0	0	0	0	0	0	0	0	0	0	0	0	0	0	0	NA	NA	10.2	0	0.00400628436763551	0	21.4	10.4	0.6	0	0	0	-Inf	FALSE	FALSE
"1"	101445368	101445506	"+"	"ENSRNOG00000020812_015i"	"ENSRNOG00000020812"	"Gys1"	138	0	0	0	1	1	0	0	0	0	0	0	0	24	22	25	50	112	1	3	0	16	55	41	2	0	0	0	0	0	0	0	0	0	0	0	0	0	0	0	1	1	0	0	0	0	0	0	0	0	0	NA	NA	0.4	0	0.00289855072463768	0	46.6	15	0	0	0.4	0	-Inf	FALSE	FALSE
"1"	101448523	101448724	"-"	"ENSRNOG00000020843+ENSRNOG00000036301_003i"	"ENSRNOG00000036301"	"AC128792.1"	201	11	6	16	36	50	0	15	0	0	7	27	1	198	354	224	172	309	1055	1210	506	841	1121	2050	10	4	4	7	20	33	0	6	0	0	3	0	1	2	0	3	1	3	0	0	0	0	0	0	0	0	0	NA	NA	23.8	4.4	0.118407960199005	0.0218905472636816	251.4	946.6	13.6	1.8	1.8	0	-1.68808103975321	TRUE	FALSE
"1"	101448851	101449292	"-"	"ENSRNOG00000020843+ENSRNOG00000036301_004i"	"ENSRNOG00000036301"	"AC128792.1"	441	14	21	18	12	22	0	0	0	0	1	71	1	138	243	119	108	208	575	607	324	483	604	1257	57	3	3	3	0	2	0	0	0	0	0	1	0	1	2	3	4	4	0	0	0	0	1	18	0	0	0	NA	NA	17.4	0.2	0.0394557823129252	0.000453514739229025	163.2	518.6	2.2	0	2.8	0.2	-4.46590811865458	TRUE	FALSE
"1"	101449440	101449727	"-"	"ENSRNOG00000020843+ENSRNOG00000036301_005i"	"ENSRNOG00000036301"	"AC128792.1"	287	33	35	40	34	59	15	5	14	5	25	555	46	205	287	196	59	81	724	629	385	264	364	2066	31	10	11	7	11	15	0	0	0	0	0	0	0	6	12	11	1	6	5	2	1	0	1	85	1	0	0	NA	22	40.2	12.8	0.14006968641115	0.0445993031358885	165.6	473.2	10.8	0	7.2	1.8	-1.1444218246994	TRUE	TRUE
"1"	101452070	101453186	"-"	"ENSRNOG00000020876_001i"	"ENSRNOG00000020876"	"Bax"	1116	11	19	8	51	62	4	0	0	8	1	21	0	23	32	37	29	72	22	27	24	27	14	214	9	1	9	1	4	9	0	0	0	0	1	7	0	0	0	0	9	1	0	0	0	0	0	1	0	0	0	NA	NA	30.2	2.6	0.0270609318996416	0.00232974910394265	38.6	22.8	4.8	0.2	2	0	-2.45233047935339	TRUE	FALSE
"1"	101453292	101455430	"-"	"ENSRNOG00000020876_002i"	"ENSRNOG00000020876"	"Bax"	2138	20	18	20	17	17	0	0	1	0	0	18	0	14	24	8	10	8	36	11	4	7	12	211	2	0	0	3	0	0	0	0	0	0	0	0	0	0	0	0	0	0	0	0	0	0	0	0	0	0	0	NA	NA	18.4	0.2	0.00860617399438728	9.35453695042096e-05	12.8	14	0.6	0	0	0	-4.52178857704904	TRUE	FALSE
"1"	101455567	101456346	"-"	"ENSRNOG00000020876_003i"	"ENSRNOG00000020876"	"Bax"	779	12	8	9	5	6	0	0	0	0	0	2	0	20	52	21	20	28	40	44	28	21	4	321	12	6	0	0	0	1	0	0	0	0	0	1	0	0	3	4	1	0	0	0	0	0	0	0	0	0	0	NA	NA	8	0	0.0102695763799743	0	28.2	27.4	1.4	0	1.6	0	-Inf	TRUE	FALSE
"1"	101456494	101456586	"-"	"ENSRNOG00000020876_004i"	"ENSRNOG00000020876"	"Bax"	92	0	2	0	5	2	0	0	0	0	0	3	0	8	11	7	4	19	2	11	0	5	3	211	4	0	1	0	1	2	0	0	0	0	0	1	0	0	1	0	4	0	0	0	0	0	0	1	0	0	0	NA	NA	1.8	0	0.0195652173913043	0	9.8	4.2	0.8	0	1	0	-Inf	FALSE	FALSE
"1"	101466787	101466987	"-"	"ENSRNOG00000020883_001i"	"ENSRNOG00000020883"	"Dhdh"	200	4	0	0	3	1	0	0	0	0	0	5	0	0	0	0	0	1	10	5	0	1	0	0	0	0	0	0	0	0	0	0	0	0	0	0	0	4	0	0	3	0	0	0	0	0	0	2	0	0	0	NA	NA	1.6	0	0.008	0	0.2	3.2	0	0	1.4	0	-Inf	FALSE	FALSE
"1"	101467136	101469463	"-"	"ENSRNOG00000020883_002i"	"ENSRNOG00000020883"	"Dhdh"	2327	8	10	10	13	14	0	0	0	1	8	41	0	3	5	13	0	0	15	7	3	0	0	0	0	0	0	0	0	0	0	0	0	0	0	4	0	0	0	0	2	0	0	0	0	1	0	0	0	0	0	NA	NA	11	1.8	0.00472711645896003	0.000773528147829824	4.2	5	0	0	0.4	0.2	-1.81010860789625	FALSE	FALSE
"1"	101469589	101471873	"-"	"ENSRNOG00000020883_003i"	"ENSRNOG00000020883"	"Dhdh"	2284	19	12	21	29	59	0	0	0	1	1	81	0	1	0	2	0	2	9	4	0	0	0	5	0	5	2	3	7	32	0	0	0	1	0	0	0	4	0	0	2	5	0	0	0	0	0	0	0	0	0	NA	NA	28	0.4	0.0122591943957968	0.000175131348511384	1	2.6	9.8	0.2	2.2	0	-4.24849524204936	TRUE	FALSE
"1"	101472127	101474797	"-"	"ENSRNOG00000020883_004i"	"ENSRNOG00000020883"	"Dhdh"	2670	17	26	17	40	39	0	0	0	0	0	28	0	0	0	1	2	0	3	0	1	0	0	0	0	6	5	1	12	12	0	0	0	0	0	0	0	2	0	1	0	0	0	0	0	0	0	1	0	0	0	NA	NA	27.8	0	0.0104119850187266	0	0.6	0.8	7.2	0	0.6	0	-Inf	TRUE	FALSE
"1"	101474454	101502986	"+"	"ENSRNOG00000020927_001i"	"ENSRNOG00000020927"	"Tulp2"	28532	4	1	1	3	9	2	2	0	0	23	8	2	0	0	0	0	0	0	0	0	0	0	0	0	0	0	0	0	0	0	0	0	0	0	0	0	0	0	0	0	0	0	0	0	0	0	0	0	0	0	NA	119	3.6	5.4	0.000126174120285995	0.000189261180428992	0	0	0	0	0	0	0.405465108108164	FALSE	FALSE
"1"	101474974	101476140	"-"	"ENSRNOG00000020883_005i"	"ENSRNOG00000020883"	"Dhdh"	1166	39	75	35	90	88	27	21	5	33	21	53	3	1	4	0	0	0	11	10	0	0	0	5	0	0	2	2	2	1	0	0	0	0	0	1	0	8	20	5	4	2	3	5	2	11	3	2	0	0	0	NA	NA	65.4	21.4	0.0560891938250429	0.0183533447684391	1	4.2	1.4	0	7.8	4.8	-1.11713133643535	TRUE	TRUE
"1"	101476241	101476777	"-"	"ENSRNOG00000020883_006i"	"ENSRNOG00000020883"	"Dhdh"	536	17	22	20	33	16	12	4	3	0	0	17	0	1	4	0	0	0	0	6	1	0	1	0	0	2	0	2	4	1	0	0	0	0	0	0	0	5	1	2	1	2	0	0	0	0	0	1	0	0	0	NA	NA	21.6	3.8	0.0402985074626866	0.00708955223880597	1	1.6	1.8	0	2.2	0	-1.73769224795778	TRUE	FALSE
"1"	101481194	101481368	"-"	"ENSRNOG00000020889_001i"	"ENSRNOG00000020889"	"Nucb1"	174	1	0	0	0	0	0	0	0	0	0	0	0	18	13	9	0	4	0	0	3	0	0	171	6	0	0	0	0	0	0	0	0	0	0	0	0	1	0	0	0	0	0	0	0	0	0	0	0	0	0	NA	NA	0.2	0	0.00114942528735632	0	8.8	0.6	0	0	0.2	0	-Inf	FALSE	FALSE
"1"	101481466	101481831	"-"	"ENSRNOG00000020889_002i"	"ENSRNOG00000020889"	"Nucb1"	365	2	2	0	1	1	0	0	0	0	0	2	0	12	38	22	3	5	23	17	9	0	0	127	6	0	1	0	0	0	0	0	0	0	0	0	0	2	0	0	0	0	0	0	0	0	0	2	0	0	0	NA	NA	1.2	0	0.00328767123287671	0	16	9.8	0.2	0	0.4	0	-Inf	FALSE	FALSE
"1"	101482003	101482246	"-"	"ENSRNOG00000020889_003i"	"ENSRNOG00000020889"	"Nucb1"	243	0	0	2	5	8	11	0	0	5	5	0	0	11	21	21	14	4	14	4	1	1	0	12	1	0	0	0	0	0	0	0	0	0	0	0	0	0	0	0	1	0	0	0	0	0	0	0	0	0	0	NA	NA	3	4.2	0.0123456790123457	0.017283950617284	14.2	4	0	0	0.2	0	0.336472236621213	FALSE	FALSE
"1"	101482340	101482412	"-"	"ENSRNOG00000020889_004i"	"ENSRNOG00000020889"	"Nucb1"	72	0	0	0	0	0	0	0	0	0	0	0	0	24	34	33	15	23	3	8	5	4	7	51	4	0	0	0	0	0	0	0	0	0	0	0	0	0	0	0	0	0	0	0	0	0	0	0	0	0	0	NA	NA	0	0	0	0	25.8	5.4	0	0	0	0	NA	FALSE	FALSE
"1"	101482506	101482731	"-"	"ENSRNOG00000020889_005i"	"ENSRNOG00000020889"	"Nucb1"	225	2	0	2	0	0	0	0	0	0	0	0	1	24	59	34	8	10	15	24	6	6	6	57	2	2	0	2	0	0	0	0	0	0	0	0	0	0	0	0	0	0	0	0	0	0	0	0	0	0	0	NA	NA	0.8	0	0.00355555555555556	0	27	11.4	0.8	0	0	0	-Inf	FALSE	FALSE
"1"	101482791	101486545	"-"	"ENSRNOG00000020889_006i"	"ENSRNOG00000020889"	"Nucb1"	3754	36	39	42	39	69	0	0	0	1	11	377	2	42	51	47	6	21	7	24	6	0	0	34	17	0	0	1	0	0	0	0	0	0	0	1	1	2	0	2	0	0	0	0	0	0	0	6	0	0	0	NA	NA	45	2.4	0.0119872136387853	0.000639318060735216	33.4	7.4	0.2	0	0.8	0	-2.93119375241642	TRUE	FALSE
"1"	101486637	101486857	"-"	"ENSRNOG00000020889_007i"	"ENSRNOG00000020889"	"Nucb1"	220	1	3	1	0	2	0	0	0	0	0	4	0	28	15	29	5	8	0	7	2	0	3	87	28	0	3	0	0	2	0	0	0	0	0	0	0	0	0	0	0	0	0	0	0	0	0	4	0	0	0	NA	NA	1.4	0	0.00636363636363636	0	17	2.4	1	0	0	0	-Inf	FALSE	FALSE
"1"	101487044	101488290	"-"	"ENSRNOG00000020889_008i"	"ENSRNOG00000020889"	"Nucb1"	1246	9	9	14	16	15	0	0	0	0	0	10	0	26	49	43	8	16	5	6	2	12	11	112	7	0	0	0	0	2	0	0	0	0	0	0	0	0	2	0	1	2	0	0	0	0	0	1	0	0	0	NA	NA	12.6	0	0.0101123595505618	0	28.4	7.2	0.4	0	1	0	-Inf	TRUE	FALSE
"1"	101488395	101490357	"-"	"ENSRNOG00000020889_009i"	"ENSRNOG00000020889"	"Nucb1"	1962	18	24	22	18	40	6	0	0	1	7	68	5	57	56	52	22	37	37	14	20	11	21	169	10	1	2	0	0	1	0	0	0	0	0	1	0	0	1	0	0	3	0	0	0	0	0	0	0	0	0	NA	NA	24.4	2.8	0.0124362895005097	0.00142711518858308	44.8	20.6	0.8	0	0.8	0	-2.164963715118	TRUE	FALSE
"1"	101490491	101491688	"-"	"ENSRNOG00000020889_010i"	"ENSRNOG00000020889"	"Nucb1"	1197	0	6	2	6	5	0	0	3	0	0	0	0	36	30	24	18	24	26	9	6	13	3	27	10	0	0	0	0	0	0	0	0	0	0	0	0	0	0	0	0	0	0	0	3	0	0	0	0	0	0	NA	NA	3.8	0.6	0.00317460317460317	0.00050125313283208	26.4	11.4	0	0	0	0.6	-1.84582669049833	FALSE	FALSE
"1"	101491797	101500150	"-"	"ENSRNOG00000020889_011i"	"ENSRNOG00000020889"	"Nucb1"	8353	38	60	33	53	54	0	1	0	0	1	23	0	24	26	56	16	37	7	1	6	0	23	130	29	0	0	3	1	1	0	0	0	0	0	0	0	1	0	0	0	0	0	0	0	0	0	0	0	0	0	NA	NA	47.6	0.4	0.00569855141865198	4.78869867113612e-05	31.8	7.4	1	0	0.2	0	-4.77912349311153	TRUE	FALSE
"1"	101500293	101500741	"-"	"ENSRNOG00000020889_012i"	"ENSRNOG00000020889"	"Nucb1"	448	2	2	1	5	6	0	0	0	1	0	67	6	2	5	4	3	0	4	3	0	0	0	0	5	0	0	0	0	0	0	0	0	0	0	20	0	0	0	0	0	3	0	0	0	1	0	3	0	0	0	NA	NA	3.2	0.2	0.00714285714285714	0.000446428571428571	2.8	1.4	0	0	0.6	0.2	-2.77258872223978	TRUE	FALSE
"1"	101503078	101503467	"+"	"ENSRNOG00000020927_002i"	"ENSRNOG00000020927"	"Tulp2"	389	0	0	0	0	0	0	0	0	0	0	0	0	0	0	0	0	0	0	0	0	0	0	0	0	0	0	0	0	0	0	0	0	0	0	0	0	0	0	0	0	0	0	0	0	0	0	0	0	0	0	NA	NA	0	0	0	0	0	0	0	0	0	0	NA	FALSE	FALSE
"1"	101503501	101503944	"+"	"ENSRNOG00000020927_003i"	"ENSRNOG00000020927"	"Tulp2"	443	0	0	0	0	0	0	0	0	0	0	0	0	0	0	0	0	0	0	0	0	0	0	0	0	0	0	0	0	0	0	0	0	0	0	0	0	0	0	0	0	0	0	0	0	0	0	0	0	0	0	NA	NA	0	0	0	0	0	0	0	0	0	0	NA	FALSE	FALSE
"1"	101503997	101504730	"+"	"ENSRNOG00000020927_004i"	"ENSRNOG00000020927"	"Tulp2"	733	0	0	0	0	0	0	0	0	0	0	0	0	0	0	0	0	0	0	0	0	0	0	0	0	0	0	0	0	0	0	0	0	0	0	0	0	0	0	0	0	0	0	0	0	0	0	0	0	0	0	NA	NA	0	0	0	0	0	0	0	0	0	0	NA	FALSE	FALSE
"1"	101504870	101505682	"+"	"ENSRNOG00000020927_005i"	"ENSRNOG00000020927"	"Tulp2"	812	0	0	0	0	0	0	0	0	0	5	0	0	0	0	0	0	0	0	0	0	0	0	0	0	0	0	0	0	0	0	0	0	0	0	0	0	0	0	0	0	0	0	0	0	0	0	0	0	0	0	NA	NA	0	1	0	0.00123152709359606	0	0	0	0	0	0	Inf	FALSE	FALSE
"1"	101505821	101505941	"+"	"ENSRNOG00000020927_006i"	"ENSRNOG00000020927"	"Tulp2"	120	0	0	0	0	0	0	0	0	0	0	0	0	0	0	0	0	0	0	0	0	0	0	0	0	0	0	0	0	0	0	0	0	0	0	0	0	0	0	0	0	0	0	0	0	0	0	0	0	0	0	NA	NA	0	0	0	0	0	0	0	0	0	0	NA	FALSE	FALSE
"1"	101506110	101507001	"+"	"ENSRNOG00000020927_007i"	"ENSRNOG00000020927"	"Tulp2"	891	0	0	0	0	0	0	0	0	0	0	0	1	0	0	0	0	0	0	0	0	0	0	0	0	0	0	0	0	0	0	0	0	0	0	0	0	0	0	0	0	0	0	0	0	0	0	0	0	0	0	NA	NA	0	0	0	0	0	0	0	0	0	0	NA	FALSE	FALSE
"1"	101507175	101507815	"+"	"ENSRNOG00000020927_008i"	"ENSRNOG00000020927"	"Tulp2"	640	0	0	0	0	0	0	0	0	0	0	0	0	0	0	0	0	0	0	0	0	0	0	0	0	0	0	0	0	0	0	0	0	0	0	0	0	0	0	0	0	0	0	0	0	0	0	0	0	0	0	NA	NA	0	0	0	0	0	0	0	0	0	0	NA	FALSE	FALSE
"1"	101508134	101508965	"+"	"ENSRNOG00000020927_010i"	"ENSRNOG00000020927"	"Tulp2"	831	0	0	0	0	0	0	0	0	0	0	0	0	0	0	0	0	0	0	0	0	0	0	0	0	0	0	0	0	0	0	0	0	0	0	0	0	0	0	0	0	0	0	0	0	0	0	0	0	0	0	NA	NA	0	0	0	0	0	0	0	0	0	0	NA	FALSE	FALSE
"1"	101509079	101509505	"+"	"ENSRNOG00000020927_011i"	"ENSRNOG00000020927"	"Tulp2"	426	0	0	0	0	0	0	0	0	0	0	0	0	0	0	0	0	0	0	0	0	0	0	0	0	0	0	0	0	0	0	0	0	0	0	0	0	0	0	0	0	0	0	0	0	0	0	0	0	0	0	NA	NA	0	0	0	0	0	0	0	0	0	0	NA	FALSE	FALSE
"1"	101509621	101509710	"+"	"ENSRNOG00000020927_012i"	"ENSRNOG00000020927"	"Tulp2"	89	0	0	0	0	0	0	0	0	0	0	0	0	0	0	0	0	0	0	0	0	0	0	0	0	0	0	0	0	0	0	0	0	0	0	0	0	0	0	0	0	0	0	0	0	0	0	0	0	0	0	NA	NA	0	0	0	0	0	0	0	0	0	0	NA	FALSE	FALSE
"1"	101509810	101510899	"+"	"ENSRNOG00000020927_013i"	"ENSRNOG00000020927"	"Tulp2"	1089	0	0	0	0	0	0	0	0	0	0	0	0	0	0	0	0	0	0	0	0	0	0	0	0	0	0	0	0	0	0	0	0	0	0	0	0	0	0	0	0	0	0	0	0	0	0	0	0	0	0	NA	NA	0	0	0	0	0	0	0	0	0	0	NA	FALSE	FALSE
"1"	101511072	101511250	"+"	"ENSRNOG00000020927_014i"	"ENSRNOG00000020927"	"Tulp2"	178	0	0	0	0	0	0	0	0	0	0	0	0	0	0	0	0	0	0	0	0	0	0	0	0	0	0	0	0	0	0	0	0	0	0	0	0	0	0	0	0	0	0	0	0	0	0	0	0	0	0	NA	NA	0	0	0	0	0	0	0	0	0	0	NA	FALSE	FALSE
"1"	101512317	101512759	"-"	"ENSRNOG00000020938_002i"	"ENSRNOG00000020938"	"Ppp1r15a"	442	2	2	4	2	1	0	0	0	0	0	6	0	7	13	25	0	6	0	3	0	0	0	24	0	1	0	0	0	1	0	0	0	0	0	0	0	1	0	4	0	0	0	0	0	0	0	6	0	0	0	NA	NA	2.2	0	0.00497737556561086	0	10.2	0.6	0.4	0	1	0	-Inf	FALSE	FALSE
"1"	101514548	101514758	"-"	"ENSRNOG00000020938_006i"	"ENSRNOG00000020938"	"Ppp1r15a"	210	0	1	4	0	0	3	0	0	0	0	0	0	43	64	74	46	102	24	29	8	17	28	28	0	0	0	0	0	0	3	0	0	0	0	0	0	0	1	4	0	0	0	0	0	0	0	0	0	0	0	NA	NA	1	0.6	0.00476190476190476	0.00285714285714286	65.8	21.2	0	0.6	1	0	-0.510825623765991	FALSE	FALSE
"1"	101518155	101518609	"+"	"ENSRNOG00000020942_001i"	"ENSRNOG00000020942"	"Plekha4"	454	0	0	0	0	0	0	0	0	0	0	0	0	0	0	0	0	2	7	0	0	0	0	0	0	0	0	0	0	0	0	0	0	0	0	0	0	0	0	0	0	0	0	0	0	0	0	0	0	0	0	NA	NA	0	0	0	0	0.4	1.4	0	0	0	0	NA	FALSE	FALSE
"1"	101518700	101520345	"+"	"ENSRNOG00000020942_002i"	"ENSRNOG00000020942"	"Plekha4"	1645	0	0	3	0	0	0	0	0	0	0	0	0	0	0	0	0	0	4	4	0	0	0	1	0	0	0	3	0	0	0	0	0	0	0	0	0	0	0	0	0	0	0	0	0	0	0	0	0	0	0	NA	NA	0.6	0	0.000364741641337386	0	0	1.6	0.6	0	0	0	-Inf	FALSE	FALSE
"1"	101520454	101522051	"+"	"ENSRNOG00000020942_003i"	"ENSRNOG00000020942"	"Plekha4"	1597	0	0	0	0	0	0	0	0	0	0	0	0	0	0	0	0	0	5	0	0	0	0	0	0	0	0	0	0	0	0	0	0	0	0	0	0	0	0	0	0	0	0	0	0	0	0	0	0	0	0	NA	NA	0	0	0	0	0	1	0	0	0	0	NA	FALSE	FALSE
"1"	101522125	101522211	"+"	"ENSRNOG00000020942_004i"	"ENSRNOG00000020942"	"Plekha4"	86	0	0	0	0	0	0	0	0	0	0	0	0	3	0	0	0	0	0	8	0	1	0	0	0	0	0	0	0	0	0	0	0	0	0	0	0	0	0	0	0	0	0	0	0	0	0	0	0	0	0	NA	NA	0	0	0	0	0.6	1.8	0	0	0	0	NA	FALSE	FALSE
"1"	101522313	101522414	"+"	"ENSRNOG00000020942_005i"	"ENSRNOG00000020942"	"Plekha4"	101	0	0	0	0	0	0	0	0	0	0	0	0	0	0	0	0	0	0	0	0	0	0	0	0	0	0	0	0	0	0	0	0	0	0	0	0	0	0	0	0	0	0	0	0	0	0	0	0	0	0	NA	NA	0	0	0	0	0	0	0	0	0	0	NA	FALSE	FALSE
"1"	101522525	101525505	"+"	"ENSRNOG00000020942_006i"	"ENSRNOG00000020942"	"Plekha4"	2980	0	0	0	2	0	0	0	0	0	1	1	0	0	0	0	0	0	0	0	0	0	0	1	0	0	0	0	0	0	0	0	0	0	0	0	0	0	0	0	0	0	0	0	0	0	0	0	0	0	0	NA	NA	0.4	0.2	0.000134228187919463	6.71140939597316e-05	0	0	0	0	0	0	-0.693147180559945	FALSE	FALSE
"1"	101525722	101526047	"+"	"ENSRNOG00000020942_007i"	"ENSRNOG00000020942"	"Plekha4"	325	0	0	1	0	0	0	0	0	0	0	13	2	0	0	0	0	0	4	4	0	1	0	1	0	0	0	0	0	0	0	0	0	0	0	0	0	0	0	1	0	0	0	0	0	0	0	3	0	0	0	NA	NA	0.2	0	0.000615384615384615	0	0	1.8	0	0	0.2	0	-Inf	FALSE	FALSE
"1"	101526328	101527183	"+"	"ENSRNOG00000020942_008i"	"ENSRNOG00000020942"	"Plekha4"	855	1	0	0	0	0	4	0	0	0	0	0	0	1	5	2	0	0	9	0	0	10	0	0	1	0	0	0	0	0	0	0	0	0	0	0	0	1	0	0	0	0	4	0	0	0	0	0	0	0	0	NA	NA	0.2	0.8	0.000233918128654971	0.000935672514619883	1.6	3.8	0	0	0.2	0.8	1.38629436111989	FALSE	FALSE
"1"	101527268	101528219	"+"	"ENSRNOG00000020942_009i"	"ENSRNOG00000020942"	"Plekha4"	951	0	4	0	4	1	0	0	0	2	0	1	0	0	1	1	0	0	2	3	0	0	0	0	0	0	0	0	0	0	0	0	0	0	0	0	0	0	0	0	0	0	0	0	0	0	0	0	0	0	0	NA	NA	1.8	0.4	0.00189274447949527	0.000420609884332282	0.4	1	0	0	0	0	-1.50407739677627	FALSE	FALSE
"1"	101528268	101528554	"+"	"ENSRNOG00000020942_010i"	"ENSRNOG00000020942"	"Plekha4"	286	0	0	0	0	0	0	0	0	0	0	0	0	2	1	1	2	0	3	3	0	0	0	2	0	0	0	0	0	0	0	0	0	0	0	0	0	0	0	0	0	0	0	0	0	0	0	0	0	0	0	NA	NA	0	0	0	0	1.2	1.2	0	0	0	0	NA	FALSE	FALSE
"1"	101528636	101528790	"+"	"ENSRNOG00000020942_011i"	"ENSRNOG00000020942"	"Plekha4"	154	0	0	0	0	1	0	0	0	0	0	1	0	0	0	0	0	0	0	0	0	0	0	0	0	0	0	0	0	0	0	0	0	0	0	0	0	0	0	0	0	1	0	0	0	0	0	0	0	0	0	NA	NA	0.2	0	0.0012987012987013	0	0	0	0	0	0.2	0	-Inf	FALSE	FALSE
"1"	101528941	101531125	"+"	"ENSRNOG00000020942_012i"	"ENSRNOG00000020942"	"Plekha4"	2184	0	0	0	0	0	0	0	0	0	2	1	0	0	0	0	0	0	10	0	0	0	1	0	0	0	0	0	0	0	0	0	0	0	0	0	0	0	0	0	0	0	0	0	0	0	0	0	0	0	0	NA	NA	0	0.4	0	0.000183150183150183	0	2.2	0	0	0	0	Inf	FALSE	FALSE
"1"	101531225	101534429	"+"	"ENSRNOG00000020942_013i"	"ENSRNOG00000020942"	"Plekha4"	3204	0	0	0	0	2	0	0	0	0	0	1	0	0	3	3	0	0	0	1	0	0	0	2	0	0	0	0	0	0	0	0	0	0	0	0	0	0	0	0	0	0	0	0	0	0	0	0	0	0	0	NA	NA	0.4	0	0.000124843945068664	0	1.2	0.2	0	0	0	0	-Inf	FALSE	FALSE
"1"	101534571	101535624	"+"	"ENSRNOG00000020942_014i"	"ENSRNOG00000020942"	"Plekha4"	1053	2	0	2	1	1	0	0	0	0	0	1	0	0	0	0	1	0	0	1	0	2	0	3	0	0	0	0	0	0	0	0	0	0	0	0	0	0	0	0	0	0	0	0	0	0	0	0	0	0	0	NA	NA	1.2	0	0.00113960113960114	0	0.2	0.6	0	0	0	0	-Inf	FALSE	FALSE
"1"	101535725	101535860	"+"	"ENSRNOG00000020942_015i"	"ENSRNOG00000020942"	"Plekha4"	135	0	0	0	0	0	0	0	0	0	0	0	0	0	0	0	0	2	0	5	0	1	0	7	0	0	0	0	0	0	0	0	0	0	0	0	0	0	0	0	0	0	0	0	0	0	0	0	0	0	0	NA	NA	0	0	0	0	0.4	1.2	0	0	0	0	NA	FALSE	FALSE
"1"	101535938	101536570	"+"	"ENSRNOG00000020942_016i"	"ENSRNOG00000020942"	"Plekha4"	632	0	0	0	0	0	0	0	0	0	0	0	0	0	0	2	1	7	0	0	3	0	0	8	0	0	0	0	0	0	0	0	0	0	0	0	0	0	0	0	0	0	0	0	0	0	0	0	0	0	0	NA	NA	0	0	0	0	2	0.6	0	0	0	0	NA	FALSE	FALSE
"1"	101536733	101539730	"+"	"ENSRNOG00000020942_017i"	"ENSRNOG00000020942"	"Plekha4"	2997	0	0	0	5	0	0	0	0	0	0	1	0	0	1	0	0	0	0	6	0	0	15	5	0	0	0	0	0	0	0	0	0	0	0	1	0	0	0	0	0	0	0	0	0	0	0	0	0	0	0	NA	NA	1	0	0.000333667000333667	0	0.2	4.2	0	0	0	0	-Inf	FALSE	FALSE
"1"	101539781	101540129	"+"	"ENSRNOG00000020942_018i"	"ENSRNOG00000020942"	"Plekha4"	348	0	0	0	0	0	0	0	0	0	0	3	0	0	1	0	0	0	5	6	0	5	0	15	0	0	0	0	0	0	0	0	0	0	0	0	0	0	0	0	0	0	0	0	0	0	0	0	0	0	0	NA	NA	0	0	0	0	0.2	3.2	0	0	0	0	NA	FALSE	FALSE
"1"	101540243	101540341	"+"	"ENSRNOG00000020942_019i"	"ENSRNOG00000020942"	"Plekha4"	98	0	1	0	0	0	0	0	0	0	0	0	0	0	1	0	2	0	8	6	0	0	0	19	0	0	0	0	0	0	0	0	0	0	0	0	0	0	1	0	0	0	0	0	0	0	0	0	0	0	0	NA	NA	0.2	0	0.00204081632653061	0	0.6	2.8	0	0	0.2	0	-Inf	FALSE	FALSE
"1"	101541354	101542149	"+"	"ENSRNOG00000020949_001i"	"ENSRNOG00000020949"	"Hsd17b14"	795	0	0	0	0	0	0	0	0	0	0	0	0	0	0	0	0	0	0	0	0	0	0	0	0	0	0	0	0	0	0	0	0	0	0	0	0	0	0	0	0	0	0	0	0	0	0	0	0	0	0	NA	NA	0	0	0	0	0	0	0	0	0	0	NA	FALSE	FALSE
"1"	101542189	101542305	"+"	"ENSRNOG00000020949_002i"	"ENSRNOG00000020949"	"Hsd17b14"	116	0	0	0	0	0	0	0	0	0	0	0	0	0	0	0	0	0	0	0	0	0	0	0	0	0	0	0	0	0	0	0	0	0	0	0	0	0	0	0	0	0	0	0	0	0	0	0	0	0	0	NA	NA	0	0	0	0	0	0	0	0	0	0	NA	FALSE	FALSE
"1"	101542389	101543316	"+"	"ENSRNOG00000020949_003i"	"ENSRNOG00000020949"	"Hsd17b14"	927	0	0	0	0	0	0	0	0	0	4	0	0	0	0	0	0	0	0	0	0	0	0	0	0	0	0	0	0	0	0	0	0	0	0	0	0	0	0	0	0	0	0	0	0	0	0	0	0	0	0	NA	NA	0	0.8	0	0.000862998921251348	0	0	0	0	0	0	Inf	FALSE	FALSE
"1"	101543384	101544773	"+"	"ENSRNOG00000020949_004i"	"ENSRNOG00000020949"	"Hsd17b14"	1389	0	0	0	0	0	0	0	0	0	0	0	1	0	0	0	0	0	0	0	0	0	0	0	0	0	0	0	0	0	0	0	0	0	0	0	0	0	0	0	0	0	0	0	0	0	0	0	1	0	0	NA	NA	0	0	0	0	0	0	0	0	0	0	NA	FALSE	FALSE
"1"	101544866	101548110	"+"	"ENSRNOG00000020949_005i"	"ENSRNOG00000020949"	"Hsd17b14"	3244	0	0	0	0	0	0	0	0	0	3	1	1	0	0	0	0	0	0	0	0	0	0	0	0	0	0	0	0	0	0	0	0	0	0	0	0	0	0	0	0	0	0	0	0	0	0	0	0	0	0	NA	NA	0	0.6	0	0.000184956843403206	0	0	0	0	0	0	Inf	FALSE	FALSE
"1"	101548216	101549935	"+"	"ENSRNOG00000020949_006i"	"ENSRNOG00000020949"	"Hsd17b14"	1719	0	0	0	0	1	0	0	0	0	0	1	0	0	0	0	0	0	0	0	0	0	0	0	0	0	0	0	0	0	0	0	0	0	0	0	0	0	0	0	0	0	0	0	0	0	0	0	0	0	0	NA	NA	0.2	0	0.000116346713205352	0	0	0	0	0	0	0	-Inf	FALSE	FALSE
"1"	101550004	101550098	"+"	"ENSRNOG00000020949_007i"	"ENSRNOG00000020949"	"Hsd17b14"	94	0	0	0	0	1	0	0	0	0	0	2	0	0	0	0	0	0	0	0	0	0	0	0	0	0	0	0	0	0	0	0	0	0	0	0	0	0	0	0	0	1	0	0	0	0	0	0	0	0	0	NA	NA	0.2	0	0.00212765957446809	0	0	0	0	0	0.2	0	-Inf	FALSE	FALSE
"1"	101550196	101550885	"+"	"ENSRNOG00000020949_008i"	"ENSRNOG00000020949"	"Hsd17b14"	689	0	0	0	0	0	0	0	0	0	0	0	0	0	0	0	0	1	0	0	0	0	0	1	0	0	0	0	0	0	0	0	0	0	0	0	0	0	0	0	0	0	0	0	0	0	0	0	0	0	0	NA	NA	0	0	0	0	0.2	0	0	0	0	0	NA	FALSE	FALSE
"1"	101554673	101559605	"+"	"ENSRNOG00000020956_001i"	"ENSRNOG00000020956"	"Bcat2"	4932	19	13	21	52	53	1	8	2	0	3	58	3	0	2	0	0	0	0	0	0	0	0	12	0	0	0	0	0	0	0	0	0	0	0	0	0	0	0	0	0	0	0	0	0	0	0	0	0	0	0	NA	NA	31.6	2.8	0.00640713706407137	0.00056772100567721	0.4	0	0	0	0	0	-2.42353770341171	TRUE	FALSE
"1"	101559681	101560138	"+"	"ENSRNOG00000020956_002i"	"ENSRNOG00000020956"	"Bcat2"	457	0	2	0	0	2	0	0	0	0	0	0	0	6	11	8	6	11	1	0	0	0	5	10	1	0	0	0	0	0	0	0	0	0	0	0	0	0	0	0	0	0	0	0	0	0	0	0	0	0	0	NA	NA	0.8	0	0.00175054704595186	0	8.4	1.2	0	0	0	0	-Inf	FALSE	FALSE
"1"	101560343	101567166	"+"	"ENSRNOG00000020956_003i"	"ENSRNOG00000020956"	"Bcat2"	6823	12	40	22	79	100	0	0	3	6	8	16	0	4	3	6	2	2	7	2	0	3	1	12	2	3	0	0	2	5	0	0	0	0	0	3	0	0	0	0	0	1	0	0	0	0	0	0	0	0	0	NA	NA	50.6	3.4	0.0074160926278763	0.000498314524402755	3.4	2.6	2	0	0.2	0	-2.7001761446713	TRUE	FALSE
"1"	101567278	101567359	"+"	"ENSRNOG00000020956_004i"	"ENSRNOG00000020956"	"Bcat2"	81	4	0	0	1	2	0	0	0	0	2	2	0	4	3	0	2	5	0	5	1	4	6	33	4	4	0	0	1	0	0	0	0	0	2	2	0	0	0	0	0	2	0	0	0	0	2	0	0	0	0	NA	NA	1.4	0.4	0.0172839506172839	0.00493827160493827	2.8	3.2	1	0.4	0.4	0.4	-1.25276296849537	FALSE	FALSE
"1"	101567480	101567619	"+"	"ENSRNOG00000020956_005i"	"ENSRNOG00000020956"	"Bcat2"	139	1	1	0	0	1	0	0	0	0	0	3	0	18	21	11	15	10	10	0	0	2	2	21	0	0	0	0	0	0	0	0	0	0	0	0	0	1	1	0	0	0	0	0	0	0	0	0	0	0	0	NA	NA	0.6	0	0.00431654676258993	0	15	2.8	0	0	0.4	0	-Inf	FALSE	FALSE
"1"	101567784	101570179	"+"	"ENSRNOG00000020956_006i"	"ENSRNOG00000020956"	"Bcat2"	2395	14	20	11	12	12	0	0	0	0	7	21	0	2	2	8	0	2	0	0	0	1	0	9	1	0	0	0	1	0	0	0	0	0	0	0	0	5	4	0	0	0	0	0	0	0	0	0	0	0	0	NA	NA	13.8	1.4	0.00576200417536534	0.00058455114822547	2.8	0.2	0.2	0	1.8	0	-2.28819635554195	TRUE	FALSE
"1"	101570323	101570479	"+"	"ENSRNOG00000020956_007i"	"ENSRNOG00000020956"	"Bcat2"	156	0	0	0	0	0	0	0	0	0	0	0	0	3	4	1	2	3	4	3	1	0	3	16	0	0	0	0	0	0	0	0	0	0	0	0	0	0	0	0	0	0	0	0	0	0	0	0	0	0	0	NA	NA	0	0	0	0	2.6	2.2	0	0	0	0	NA	FALSE	FALSE
"1"	101570566	101570777	"+"	"ENSRNOG00000020956_008i"	"ENSRNOG00000020956"	"Bcat2"	211	2	4	0	1	8	0	0	0	0	0	1	0	0	0	0	3	0	0	3	2	0	0	18	1	0	0	0	0	0	0	0	0	0	0	0	0	0	2	0	0	3	0	0	0	0	0	0	0	0	0	NA	NA	3	0	0.014218009478673	0	0.6	1	0	0	1	0	-Inf	FALSE	FALSE
"1"	101570919	101570992	"+"	"ENSRNOG00000020956_009i"	"ENSRNOG00000020956"	"Bcat2"	73	0	0	0	0	0	0	0	0	0	0	1	0	4	0	2	1	1	0	1	0	0	0	19	0	0	0	0	0	0	0	0	0	0	0	0	0	0	0	0	0	0	0	0	0	0	0	1	0	0	0	NA	NA	0	0	0	0	1.6	0.2	0	0	0	0	NA	FALSE	FALSE
"1"	101571068	101571709	"+"	"ENSRNOG00000020956_010i"	"ENSRNOG00000020956"	"Bcat2"	641	0	1	0	1	4	0	0	0	0	1	3	0	7	4	0	0	0	5	0	0	0	2	34	1	0	0	0	0	0	0	0	0	0	0	0	0	0	0	0	0	0	0	0	0	0	0	0	0	0	0	NA	NA	1.2	0.2	0.00187207488299532	0.00031201248049922	2.2	1.4	0	0	0	0	-1.79175946922805	FALSE	FALSE
"1"	101595864	101596383	"-"	"ENSRNOG00000020990_001i"	"ENSRNOG00000020990"	"Fgf21"	519	0	0	0	0	0	0	0	0	0	0	0	0	0	0	0	2	0	0	0	0	0	0	1	0	0	0	0	0	0	0	0	0	0	0	0	0	0	0	0	0	0	0	0	0	0	0	0	0	0	0	NA	NA	0	0	0	0	0.4	0	0	0	0	0	NA	FALSE	FALSE
"1"	101596488	101596584	"-"	"ENSRNOG00000020990_002i"	"ENSRNOG00000020990"	"Fgf21"	96	0	0	0	0	0	0	0	0	0	0	0	0	0	0	0	3	2	0	0	0	0	0	0	0	0	0	0	0	0	0	0	0	0	0	0	0	0	0	0	0	0	0	0	0	0	0	0	0	0	0	NA	NA	0	0	0	0	1	0	0	0	0	0	NA	FALSE	FALSE
"1"	101599497	101600196	"+"	"ENSRNOG00000020995_001i"	"ENSRNOG00000020995"	"Fut1"	699	0	0	0	0	0	0	0	1	0	0	0	0	0	0	0	0	0	0	0	0	0	0	0	0	0	0	0	0	0	0	0	0	0	0	0	0	0	0	0	0	0	0	0	0	0	0	0	0	0	0	NA	NA	0	0.2	0	0.000286123032904149	0	0	0	0	0	0	Inf	FALSE	FALSE
"1"	101603444	101604136	"+"	"ENSRNOG00000024678_001i"	"ENSRNOG00000024678"	"Izumo1"	692	0	0	0	0	0	0	0	0	0	0	0	0	0	0	0	0	0	0	0	0	0	0	0	0	0	0	0	0	0	0	0	0	0	0	0	0	0	0	0	0	0	0	0	0	0	0	0	0	0	0	NA	NA	0	0	0	0	0	0	0	0	0	0	NA	FALSE	FALSE
"1"	101604450	101605059	"+"	"ENSRNOG00000024678_002i"	"ENSRNOG00000024678"	"Izumo1"	609	0	0	0	0	2	0	0	0	0	0	0	0	0	0	0	0	0	0	0	0	0	0	0	0	0	0	0	0	0	0	0	0	0	0	0	0	0	0	0	0	2	0	0	0	0	0	0	0	0	0	NA	NA	0.4	0	0.000656814449917898	0	0	0	0	0	0.4	0	-Inf	FALSE	FALSE
"1"	101605135	101605918	"+"	"ENSRNOG00000024678_003i"	"ENSRNOG00000024678"	"Izumo1"	783	0	0	0	0	0	0	0	0	0	0	1	0	0	2	0	0	0	0	0	0	0	0	0	0	0	0	0	0	0	0	0	0	0	0	0	0	0	0	0	0	0	0	0	0	0	0	0	0	0	0	NA	NA	0	0	0	0	0.4	0	0	0	0	0	NA	FALSE	FALSE
"1"	101606006	101606621	"+"	"ENSRNOG00000024678_004i"	"ENSRNOG00000024678"	"Izumo1"	615	0	0	0	0	0	0	0	0	0	0	0	0	0	2	0	0	0	0	0	0	0	0	0	0	0	0	0	0	0	0	0	0	0	0	0	0	0	0	0	0	0	0	0	0	0	0	0	0	0	0	NA	NA	0	0	0	0	0.4	0	0	0	0	0	NA	FALSE	FALSE
"1"	101606643	101606889	"+"	"ENSRNOG00000024678_005i"	"ENSRNOG00000024678"	"Izumo1"	246	0	0	0	0	0	0	0	0	0	0	0	0	0	2	0	0	0	0	0	0	0	0	0	0	0	0	0	0	0	0	0	0	0	0	0	0	0	0	0	0	0	0	0	0	0	0	0	0	0	0	NA	NA	0	0	0	0	0.4	0	0	0	0	0	NA	FALSE	FALSE
"1"	101606971	101607085	"+"	"ENSRNOG00000024678_006i"	"ENSRNOG00000024678"	"Izumo1"	114	0	0	0	0	0	0	0	0	0	0	0	0	0	0	0	0	0	0	0	0	0	0	0	0	0	0	0	0	0	0	0	0	0	0	0	0	0	0	0	0	0	0	0	0	0	0	0	0	0	0	NA	NA	0	0	0	0	0	0	0	0	0	0	NA	FALSE	FALSE
"1"	101607187	101607516	"+"	"ENSRNOG00000024678_007i"	"ENSRNOG00000024678"	"Izumo1"	329	1	0	0	1	0	0	0	0	0	0	2	0	0	0	0	0	0	0	0	0	0	0	0	0	0	0	0	0	0	0	0	0	0	0	0	0	1	0	0	0	0	0	0	0	0	0	0	0	0	0	NA	NA	0.4	0	0.00121580547112462	0	0	0	0	0	0.2	0	-Inf	FALSE	FALSE
"1"	101607671	101607973	"+"	"ENSRNOG00000024678_008i"	"ENSRNOG00000024678"	"Izumo1"	302	0	0	0	0	0	0	0	0	0	0	0	0	0	0	0	0	1	0	0	0	0	0	0	0	0	0	0	0	0	0	0	0	0	0	0	0	0	0	0	0	0	0	0	0	0	0	0	0	0	0	NA	NA	0	0	0	0	0.2	0	0	0	0	0	NA	FALSE	FALSE
"1"	101608194	101608773	"+"	"ENSRNOG00000024678_009i"	"ENSRNOG00000024678"	"Izumo1"	579	0	0	0	0	0	0	0	0	0	0	0	0	0	0	0	0	0	0	0	0	0	0	0	0	0	0	0	0	0	0	0	0	0	0	0	0	0	0	0	0	0	0	0	0	0	0	0	0	0	0	NA	NA	0	0	0	0	0	0	0	0	0	0	NA	FALSE	FALSE
"1"	101610815	101611721	"+"	"ENSRNOG00000021004_001i"	"ENSRNOG00000021004"	"Rasip1"	906	0	0	0	0	3	0	0	0	0	9	4	1	0	0	0	0	0	0	0	0	0	0	9	8	0	0	0	0	0	0	0	0	0	0	0	0	0	0	0	0	0	0	0	0	0	0	0	0	0	0	NA	NA	0.6	1.8	0.000662251655629139	0.00198675496688742	0	0	0	0	0	0	1.09861228866811	FALSE	FALSE
"1"	101612078	101614506	"+"	"ENSRNOG00000021004_002i"	"ENSRNOG00000021004"	"Rasip1"	2428	2	0	2	1	6	0	0	0	0	0	0	0	6	11	6	2	2	0	10	0	6	4	18	3	2	0	0	0	0	0	0	0	0	0	0	0	0	0	0	0	0	0	0	0	0	0	0	0	0	0	NA	NA	2.2	0	0.000906095551894563	0	5.4	4	0.4	0	0	0	-Inf	FALSE	FALSE
"1"	101615161	101616996	"+"	"ENSRNOG00000021004_003i"	"ENSRNOG00000021004"	"Rasip1"	1835	21	15	26	20	30	0	0	0	0	0	46	0	5	7	10	4	6	0	4	3	3	0	9	0	3	3	0	1	10	0	0	0	0	0	4	0	0	0	0	0	0	0	0	0	0	0	0	0	0	0	NA	NA	22.4	0	0.0122070844686648	0	6.4	2	3.4	0	0	0	-Inf	TRUE	FALSE
"1"	101617035	101617199	"+"	"ENSRNOG00000021004_004i"	"ENSRNOG00000021004"	"Rasip1"	164	0	0	0	2	3	0	0	0	0	0	7	0	4	5	5	5	2	0	0	0	0	0	19	0	0	0	0	2	0	0	0	0	0	0	1	0	0	0	0	0	1	0	0	0	0	0	2	0	0	0	NA	NA	1	0	0.00609756097560976	0	4.2	0	0.4	0	0.2	0	-Inf	FALSE	FALSE
"1"	101617352	101617455	"+"	"ENSRNOG00000021004_005i"	"ENSRNOG00000021004"	"Rasip1"	103	3	0	0	8	3	0	0	0	1	0	0	0	0	5	3	0	0	0	0	0	0	0	35	0	3	0	0	7	2	0	0	0	1	0	0	0	0	0	0	0	1	0	0	0	0	0	0	0	0	0	NA	NA	2.8	0.2	0.0271844660194175	0.00194174757281553	1.6	0	2.4	0.2	0.2	0	-2.63905732961526	FALSE	FALSE
"1"	101617572	101618566	"+"	"ENSRNOG00000021004_006i"	"ENSRNOG00000021004"	"Rasip1"	994	0	4	1	6	14	0	0	0	0	0	5	0	4	5	4	3	2	0	0	0	1	0	31	0	0	0	0	0	1	0	0	0	0	0	0	0	0	0	0	0	1	0	0	0	0	0	0	0	0	0	NA	NA	5	0	0.00503018108651911	0	3.6	0.2	0.2	0	0.2	0	-Inf	FALSE	FALSE
"1"	101618811	101618931	"+"	"ENSRNOG00000021004_007i"	"ENSRNOG00000021004"	"Rasip1"	120	0	0	0	0	0	0	0	0	0	0	0	0	3	7	5	2	5	10	0	6	0	0	21	0	0	0	0	0	0	0	0	0	0	0	0	0	0	0	0	0	0	0	0	0	0	0	0	0	0	0	NA	NA	0	0	0	0	4.4	3.2	0	0	0	0	NA	FALSE	FALSE
"1"	101619105	101620375	"+"	"ENSRNOG00000021004_008i"	"ENSRNOG00000021004"	"Rasip1"	1270	0	1	5	5	2	0	0	0	0	0	3	0	22	24	11	10	32	10	12	7	3	2	26	2	0	0	2	0	0	0	0	0	0	0	0	0	0	1	3	2	0	0	0	0	0	0	0	0	0	0	NA	NA	2.6	0	0.00204724409448819	0	19.8	6.8	0.4	0	1.2	0	-Inf	FALSE	FALSE
"1"	101620524	101621241	"+"	"ENSRNOG00000021004_009i"	"ENSRNOG00000021004"	"Rasip1"	717	2	0	0	7	5	0	0	0	0	0	2	0	17	7	11	8	15	7	2	1	0	6	33	1	0	0	0	0	3	0	0	0	0	0	0	0	0	0	0	2	2	0	0	0	0	0	2	0	0	0	NA	NA	2.8	0	0.00390516039051604	0	11.6	3.2	0.6	0	0.8	0	-Inf	FALSE	FALSE
"1"	101623366	101624326	"+"	"ENSRNOG00000024580_001i"	"ENSRNOG00000024580"	"Mamstr"	960	0	1	0	0	0	0	0	0	0	1	6	0	0	0	0	0	0	0	0	0	0	0	0	0	0	0	0	0	0	0	0	0	0	0	0	0	0	0	0	0	0	0	0	0	0	1	1	0	0	0	NA	NA	0.2	0.2	0.000208333333333333	0.000208333333333333	0	0	0	0	0	0.2	0	FALSE	FALSE
"1"	101624366	101624874	"+"	"ENSRNOG00000024580_002i"	"ENSRNOG00000024580"	"Mamstr"	508	0	0	0	2	0	0	0	0	0	0	0	0	0	0	0	0	0	0	0	0	0	1	0	0	0	0	0	0	0	0	0	0	0	0	0	0	0	0	0	2	0	0	0	0	0	0	0	0	0	0	NA	NA	0.4	0	0.00078740157480315	0	0	0.2	0	0	0.4	0	-Inf	FALSE	FALSE
"1"	101625015	101625304	"+"	"ENSRNOG00000024580_003i"	"ENSRNOG00000024580"	"Mamstr"	289	0	1	0	0	0	0	0	0	0	0	0	1	0	0	0	0	0	0	0	0	0	0	0	0	0	0	0	0	0	0	0	0	0	0	0	0	0	0	0	0	0	0	0	0	0	0	0	0	0	0	NA	NA	0.2	0	0.00069204152249135	0	0	0	0	0	0	0	-Inf	FALSE	FALSE
"1"	101625490	101625789	"+"	"ENSRNOG00000024580_004i"	"ENSRNOG00000024580"	"Mamstr"	299	0	1	0	0	1	0	0	0	0	0	0	0	0	2	0	0	0	0	0	0	0	0	0	0	0	0	0	0	0	0	0	0	0	0	0	0	0	1	0	0	0	0	0	0	0	0	0	0	0	0	NA	NA	0.4	0	0.00133779264214047	0	0.4	0	0	0	0.2	0	-Inf	FALSE	FALSE
"1"	101625892	101626059	"+"	"ENSRNOG00000024580_006i"	"ENSRNOG00000024580"	"Mamstr"	167	0	0	0	0	0	0	0	0	0	0	0	0	0	0	0	0	0	0	0	0	0	0	0	0	0	0	0	0	0	0	0	0	0	0	0	0	0	0	0	0	0	0	0	0	0	0	0	0	0	0	NA	NA	0	0	0	0	0	0	0	0	0	0	NA	FALSE	FALSE
"1"	101626255	101626832	"+"	"ENSRNOG00000024580_007i"	"ENSRNOG00000024580"	"Mamstr"	577	4	0	0	0	0	0	0	0	0	0	1	0	0	0	0	0	0	0	0	0	2	0	0	0	0	0	0	0	0	0	0	0	0	0	0	0	0	0	0	0	0	0	0	0	0	0	0	0	0	0	NA	NA	0.8	0	0.00138648180242634	0	0	0.4	0	0	0	0	-Inf	FALSE	FALSE
"1"	101627113	101627139	"+"	"ENSRNOG00000024580_010i"	"ENSRNOG00000024580"	"Mamstr"	26	0	0	0	0	0	0	0	0	0	0	0	0	0	3	0	4	0	0	0	0	0	0	0	0	0	0	0	0	0	0	0	0	0	0	0	0	0	0	0	0	0	0	0	0	0	0	0	0	0	0	NA	NA	0	0	0	0	1.4	0	0	0	0	0	NA	FALSE	FALSE
"1"	101627195	101627325	"+"	"ENSRNOG00000024580_011i"	"ENSRNOG00000024580"	"Mamstr"	130	1	0	1	1	4	0	0	0	0	0	1	0	0	0	0	5	0	0	0	0	0	0	0	0	0	0	0	0	0	0	0	0	0	0	0	0	1	0	1	1	3	0	0	0	0	0	0	0	0	0	NA	NA	1.4	0	0.0107692307692308	0	1	0	0	0	1.2	0	-Inf	FALSE	FALSE
"1"	101634408	101639580	"-"	"ENSRNOG00000021011_001i"	"ENSRNOG00000021011"	"Fut2"	5172	0	0	0	0	0	0	0	0	0	0	1	0	0	0	0	0	0	0	0	0	0	0	1	0	0	0	0	0	0	0	0	0	0	0	0	0	0	0	0	0	0	0	0	0	0	0	0	0	0	0	NA	NA	0	0	0	0	0	0	0	0	0	0	NA	FALSE	FALSE
"1"	101639685	101651561	"-"	"ENSRNOG00000021011_002i"	"ENSRNOG00000021011"	"Fut2"	11876	1	0	0	2	3	0	0	0	0	3	3	0	0	0	0	0	0	0	0	0	0	0	0	0	0	0	0	0	0	0	0	0	0	0	0	0	0	0	0	0	0	0	0	0	0	0	0	0	0	0	NA	NA	1.2	0.6	0.000101044122600202	5.0522061300101e-05	0	0	0	0	0	0	-0.693147180559945	FALSE	FALSE
"1"	101669171	101670754	"+"	"ENSRNOG00000021016_001i"	"ENSRNOG00000021016"	"Ntn5"	1583	0	0	0	0	0	0	0	1	0	0	0	0	0	0	0	0	0	0	0	0	0	0	0	0	0	0	0	0	0	0	0	0	0	0	0	0	0	0	0	0	0	0	0	0	0	0	0	0	0	0	NA	NA	0	0.2	0	0.000126342387871131	0	0	0	0	0	0	Inf	FALSE	FALSE
"1"	101671400	101674559	"+"	"ENSRNOG00000021016_002i"	"ENSRNOG00000021016"	"Ntn5"	3159	0	0	0	0	2	0	0	0	0	8	1	0	0	0	0	0	0	0	0	0	0	0	0	0	0	0	0	0	0	0	0	0	0	0	0	0	0	0	0	0	0	0	0	0	0	0	0	0	0	0	NA	NA	0.4	1.6	0.000126622348844571	0.000506489395378284	0	0	0	0	0	0	1.38629436111989	FALSE	FALSE
"1"	101674710	101675029	"+"	"ENSRNOG00000021016_003i"	"ENSRNOG00000021016"	"Ntn5"	319	0	0	0	0	0	0	0	0	0	0	0	0	0	0	0	0	0	0	0	0	0	0	0	0	0	0	0	0	0	0	0	0	0	0	0	0	0	0	0	0	0	0	0	0	0	0	0	0	0	0	NA	NA	0	0	0	0	0	0	0	0	0	0	NA	FALSE	FALSE
"1"	101675084	101675473	"+"	"ENSRNOG00000021016_004i"	"ENSRNOG00000021016"	"Ntn5"	389	0	0	0	0	0	0	0	0	0	0	0	0	0	0	0	0	0	0	0	0	0	0	0	0	0	0	0	0	0	0	0	0	0	0	0	0	0	0	0	0	0	0	0	0	0	0	0	0	0	0	NA	NA	0	0	0	0	0	0	0	0	0	0	NA	FALSE	FALSE
"1"	101675555	101677189	"+"	"ENSRNOG00000021016_005i"	"ENSRNOG00000021016"	"Ntn5"	1634	0	0	0	0	0	0	0	0	0	1	1	0	0	0	0	0	0	0	0	0	0	0	0	0	0	0	0	0	0	0	0	0	0	0	0	0	0	0	0	0	0	0	0	0	0	0	0	0	0	0	NA	NA	0	0.2	0	0.000122399020807834	0	0	0	0	0	0	Inf	FALSE	FALSE
"1"	101682479	101682563	"+"	"ENSRNOG00000021017_001i"	"ENSRNOG00000021017"	"Car11"	84	0	1	0	0	0	0	0	0	0	0	0	1	3	0	0	0	2	0	0	0	0	0	35	1	0	0	0	0	0	0	0	0	0	0	0	0	0	1	0	0	0	0	0	0	0	0	0	1	0	0	NA	NA	0.2	0	0.00238095238095238	0	1	0	0	0	0.2	0	-Inf	FALSE	FALSE
"1"	101682639	101683369	"+"	"ENSRNOG00000021017_002i"	"ENSRNOG00000021017"	"Car11"	730	1	5	6	20	13	0	0	0	0	0	30	1	0	5	0	1	5	0	0	4	0	0	64	5	0	1	0	3	4	0	0	0	0	0	0	0	1	2	2	1	0	0	0	0	0	0	3	0	0	0	NA	NA	9	0	0.0123287671232877	0	2.2	0.8	1.6	0	1.2	0	-Inf	TRUE	FALSE
"1"	101683513	101685123	"+"	"ENSRNOG00000021017_003i"	"ENSRNOG00000021017"	"Car11"	1610	11	20	22	41	31	0	0	0	1	0	2	0	14	18	3	29	28	5	5	2	17	7	59	1	0	4	0	0	1	0	0	0	0	0	0	0	0	2	0	4	0	0	0	0	0	0	0	0	0	0	NA	NA	25	0.2	0.015527950310559	0.000124223602484472	18.4	7.2	1	0	1.2	0	-4.8283137373023	TRUE	FALSE
"1"	101685310	101685521	"+"	"ENSRNOG00000021017_004i"	"ENSRNOG00000021017"	"Car11"	211	3	2	9	26	37	0	0	0	0	0	8	0	10	6	3	28	20	9	1	0	3	2	68	2	0	0	2	14	19	0	0	0	0	0	0	0	2	0	1	2	1	0	0	0	0	0	0	0	0	0	NA	NA	15.4	0	0.0729857819905213	0	13.4	3	7	0	1.2	0	-Inf	TRUE	FALSE
"1"	101685618	101685748	"+"	"ENSRNOG00000021017_005i"	"ENSRNOG00000021017"	"Car11"	130	9	3	3	54	68	4	0	0	5	4	56	0	35	49	27	63	51	23	20	14	39	30	48	0	4	0	0	5	6	0	0	0	0	1	8	0	5	3	3	47	61	4	0	0	5	2	16	0	0	0	NA	NA	27.4	2.6	0.210769230769231	0.02	45	25.2	3	0.2	23.8	2.2	-2.35503156836659	TRUE	FALSE
"1"	101685822	101686143	"+"	"ENSRNOG00000021017_006i"	"ENSRNOG00000021017"	"Car11"	321	4	6	1	41	46	0	0	0	1	2	27	0	13	25	9	40	23	9	18	8	15	16	84	1	0	1	0	1	0	0	0	0	1	0	1	0	0	2	1	21	23	0	0	0	0	0	2	0	0	0	NA	NA	19.6	0.6	0.0610591900311526	0.00186915887850467	22	13.2	0.4	0.2	9.4	0	-3.48635519000246	TRUE	FALSE
"1"	101686299	101686379	"+"	"ENSRNOG00000021017_007i"	"ENSRNOG00000021017"	"Car11"	80	5	4	0	16	29	0	0	0	0	0	2	0	46	54	48	168	96	36	19	33	98	43	133	2	5	2	0	3	9	0	0	0	0	0	1	0	0	0	0	15	22	0	0	0	0	0	1	0	0	0	NA	NA	10.8	0	0.135	0	82.4	45.8	3.8	0	7.4	0	-Inf	FALSE	FALSE
"1"	101686546	101687162	"+"	"ENSRNOG00000021017_008i"	"ENSRNOG00000021017"	"Car11"	616	4	7	0	24	25	0	0	0	0	2	1	0	32	70	33	102	123	13	21	8	31	36	38	0	0	1	0	4	8	0	0	0	0	0	0	0	2	4	0	0	1	0	0	0	0	1	0	0	0	0	NA	NA	12	0.4	0.0194805194805195	0.000649350649350649	72	21.8	2.6	0	1.4	0.2	-3.40119738166216	FALSE	FALSE
"1"	101688436	101689277	"+"	"ENSRNOG00000021027_003i"	"ENSRNOG00000021027"	"Dbp"	841	15	10	6	62	72	4	0	3	21	20	60	5	7	1	4	0	2	12	0	0	0	0	88	5	2	2	1	0	1	0	0	0	0	0	0	0	0	0	0	2	4	0	0	0	4	0	6	0	0	0	NA	NA	33	9.6	0.0392390011890606	0.0114149821640904	2.8	2.4	1.2	0	1.2	0.8	-1.23474446299269	TRUE	FALSE
"1"	101689689	101690931	"+"	"ENSRNOG00000021027_005i"	"ENSRNOG00000021027"	"Dbp"	1242	6	14	12	13	12	11	0	0	0	0	55	5	4	3	3	16	11	0	0	0	7	12	22	0	0	0	0	0	0	0	0	0	0	0	0	0	0	0	1	1	0	0	0	0	0	0	0	0	0	0	NA	NA	11.4	2.2	0.00917874396135266	0.00177133655394525	7.4	3.8	0	0	0.4	0	-1.64515599503618	TRUE	FALSE
"1"	101691144	101692348	"+"	"ENSRNOG00000021027_006i"	"ENSRNOG00000021027"	"Dbp"	1204	6	5	9	3	10	0	4	0	0	1	94	1	19	29	13	10	10	31	10	6	0	2	5	2	0	0	1	0	0	0	0	0	0	0	0	0	0	0	0	0	0	0	0	0	0	0	0	0	0	0	NA	NA	6.6	1	0.00548172757475083	0.000830564784053156	16.2	9.8	0.2	0	0	0	-1.88706964903238	TRUE	FALSE
"1"	101694492	101694772	"-"	"ENSRNOG00000021032_001i"	"ENSRNOG00000021032"	"Sphk2"	280	2	1	2	16	22	5	0	0	1	5	49	1	3	1	5	5	4	0	0	0	0	0	36	0	0	0	0	2	4	0	0	0	1	2	2	0	0	0	1	7	6	5	0	0	0	1	7	0	0	0	NA	NA	8.6	2.2	0.0307142857142857	0.00785714285714286	3.6	0	1.2	0.6	2.8	1.2	-1.36330484289519	TRUE	FALSE
"1"	101694889	101694970	"-"	"ENSRNOG00000021032_002i"	"ENSRNOG00000021032"	"Sphk2"	81	0	1	0	1	4	0	0	0	0	0	8	0	0	1	2	11	10	0	0	2	7	4	37	1	0	0	0	0	3	0	0	0	0	0	7	0	0	1	0	1	1	0	0	0	0	0	0	0	0	0	NA	NA	1.2	0	0.0148148148148148	0	4.8	2.6	0.6	0	0.6	0	-Inf	FALSE	FALSE
"1"	101695066	101695171	"-"	"ENSRNOG00000021032_003i"	"ENSRNOG00000021032"	"Sphk2"	105	0	0	2	1	2	0	0	0	0	0	0	0	1	4	0	2	3	0	0	0	0	2	29	2	0	0	2	0	1	0	0	0	0	0	0	0	0	0	0	0	0	0	0	0	0	0	0	0	0	0	NA	NA	1	0	0.00952380952380952	0	2	0.4	0.6	0	0	0	-Inf	FALSE	FALSE
"1"	101695322	101695980	"-"	"ENSRNOG00000021032_004i"	"ENSRNOG00000021032"	"Sphk2"	658	0	6	1	22	33	0	0	0	0	0	6	0	6	2	4	1	1	0	0	0	0	2	13	5	0	0	0	0	2	0	0	0	0	0	0	0	0	0	0	0	1	0	0	0	0	0	0	0	0	0	NA	NA	12.4	0	0.0188449848024316	0	2.8	0.4	0.4	0	0.2	0	-Inf	FALSE	FALSE
"1"	101696453	101697247	"-"	"ENSRNOG00000021032_005i"	"ENSRNOG00000021032"	"Sphk2"	794	23	20	28	80	110	0	0	0	0	2	28	0	10	16	7	14	21	24	0	4	9	7	26	1	0	6	3	1	2	0	0	0	0	1	2	0	4	2	1	4	6	0	0	0	0	0	0	0	0	0	14	NA	52.2	0.4	0.065743073047859	0.000503778337531486	13.6	8.8	2.4	0.2	3.4	0	-4.87137322676275	TRUE	FALSE
"1"	101702072	101702266	"+"	"ENSRNOG00000021035_001i"	"ENSRNOG00000021035"	"Rpl18"	194	0	0	2	4	5	0	0	0	0	0	0	0	128	159	160	181	183	259	238	137	155	160	663	52	0	0	0	3	2	0	0	0	0	0	0	0	0	0	2	0	2	0	0	0	0	0	0	0	0	0	NA	NA	2.2	0	0.011340206185567	0	162.2	189.8	1	0	0.8	0	-Inf	FALSE	FALSE
"1"	101702375	101702674	"+"	"ENSRNOG00000021035_002i"	"ENSRNOG00000021035"	"Rpl18"	299	4	11	0	12	10	0	0	0	0	0	5	0	121	160	133	22	53	201	190	108	56	56	488	54	1	0	0	0	4	0	0	0	0	0	1	0	1	0	0	2	3	0	0	0	0	0	1	0	0	0	NA	NA	7.4	0	0.0247491638795987	0	97.8	122.2	1	0	1.2	0	-Inf	FALSE	FALSE
"1"	101702774	101703017	"+"	"ENSRNOG00000021035_003i"	"ENSRNOG00000021035"	"Rpl18"	243	0	4	2	2	6	0	0	0	0	2	12	0	77	133	86	31	54	189	180	133	53	110	641	33	0	0	0	1	1	0	0	0	0	0	0	0	0	0	2	0	1	0	0	0	0	0	3	0	0	0	NA	NA	2.8	0.4	0.011522633744856	0.00164609053497942	76.2	133	0.4	0	0.6	0	-1.94591014905531	FALSE	FALSE
"1"	101703212	101703435	"+"	"ENSRNOG00000021035_004i"	"ENSRNOG00000021035"	"Rpl18"	223	0	4	3	2	2	0	0	0	0	0	6	0	89	115	82	76	91	105	183	82	121	106	478	3	0	1	1	0	0	0	0	0	0	0	0	0	0	1	2	0	1	0	0	0	0	0	0	0	0	0	NA	NA	2.2	0	0.00986547085201794	0	90.6	119.4	0.4	0	0.8	0	-Inf	FALSE	FALSE
"1"	101705220	101705964	"+"	"ENSRNOG00000021039_001i"	"ENSRNOG00000021039"	"Fam83e"	744	4	4	4	3	4	0	0	0	0	0	0	0	0	0	0	0	0	0	0	0	0	0	0	0	0	0	3	1	2	0	0	0	0	0	0	0	0	1	1	1	0	0	0	0	0	0	0	0	0	0	NA	NA	3.8	0	0.00510752688172043	0	0	0	1.2	0	0.6	0	-Inf	TRUE	FALSE
"1"	101706133	101706381	"+"	"ENSRNOG00000021039_002i"	"ENSRNOG00000021039"	"Fam83e"	248	0	0	0	0	0	0	0	0	0	0	0	0	0	0	0	0	0	0	0	0	0	0	0	0	0	0	0	0	0	0	0	0	0	0	0	0	0	0	0	0	0	0	0	0	0	0	0	0	0	0	NA	NA	0	0	0	0	0	0	0	0	0	0	NA	FALSE	FALSE
"1"	101706507	101709133	"+"	"ENSRNOG00000021039_003i"	"ENSRNOG00000021039"	"Fam83e"	2626	0	0	0	0	0	0	0	0	0	0	0	0	0	0	0	0	0	0	0	0	0	0	0	0	0	0	0	0	0	0	0	0	0	0	0	0	0	0	0	0	0	0	0	0	0	0	0	0	0	0	NA	NA	0	0	0	0	0	0	0	0	0	0	NA	FALSE	FALSE
"1"	101709579	101711145	"+"	"ENSRNOG00000021039_004i"	"ENSRNOG00000021039"	"Fam83e"	1566	1	4	0	1	0	0	0	0	0	0	0	0	0	0	0	0	0	0	0	0	0	0	0	0	0	0	0	0	0	0	0	0	0	0	0	0	0	0	0	0	0	0	0	0	0	0	0	0	0	0	NA	NA	1.2	0	0.000766283524904215	0	0	0	0	0	0	0	-Inf	FALSE	FALSE
"1"	101712477	101713466	"-"	"ENSRNOG00000021046_002i"	"ENSRNOG00000021046"	"Sult2b1"	989	0	1	0	1	2	0	0	0	0	0	1	0	0	0	1	0	1	0	0	0	0	0	14	2	0	0	0	0	0	0	0	0	0	0	0	0	0	0	0	0	0	0	0	0	0	0	0	0	0	0	NA	NA	0.8	0	0.000808897876643074	0	0.4	0	0	0	0	0	-Inf	FALSE	FALSE
"1"	101713648	101716927	"-"	"ENSRNOG00000021046_003i"	"ENSRNOG00000021046"	"Sult2b1"	3279	4	7	2	4	12	0	0	0	2	0	61	0	1	3	4	0	8	3	0	2	0	0	25	4	0	4	0	0	0	0	0	0	0	0	1	0	0	0	0	0	0	0	0	0	0	0	4	0	0	0	NA	NA	5.8	0.4	0.00176883196096371	0.000121988411100945	3.2	1	0.8	0	0	0	-2.67414864942653	FALSE	FALSE
"1"	101717023	101717309	"-"	"ENSRNOG00000021046_004i"	"ENSRNOG00000021046"	"Sult2b1"	286	0	0	0	0	0	0	0	0	0	0	5	0	1	0	1	0	4	0	0	0	0	2	13	1	0	0	0	0	0	0	0	0	0	0	0	0	0	0	0	0	0	0	0	0	0	0	0	0	0	0	NA	NA	0	0	0	0	1.2	0.4	0	0	0	0	NA	FALSE	FALSE
"1"	101717437	101718863	"-"	"ENSRNOG00000021046_005i"	"ENSRNOG00000021046"	"Sult2b1"	1426	0	0	1	0	0	0	0	0	0	0	1	0	0	3	1	3	8	0	3	5	10	9	20	1	0	0	0	0	0	0	0	0	0	0	0	0	0	0	0	0	0	0	0	0	0	0	0	0	0	0	NA	NA	0.2	0	0.000140252454417952	0	3	5.4	0	0	0	0	-Inf	FALSE	FALSE
"1"	101719073	101724533	"-"	"ENSRNOG00000021046_006i"	"ENSRNOG00000021046"	"Sult2b1"	5460	1	0	0	12	19	0	0	0	0	2	10	0	0	4	4	0	3	0	0	0	3	2	52	4	0	0	0	0	0	0	0	0	0	0	0	0	0	0	0	0	0	0	0	0	0	0	0	0	0	0	NA	NA	6.4	0.4	0.00117216117216117	7.32600732600733e-05	2.2	1	0	0	0	0	-2.77258872223978	FALSE	FALSE
"1"	101724677	101741329	"-"	"ENSRNOG00000021046_007i"	"ENSRNOG00000021046"	"Sult2b1"	16652	6	5	4	23	46	10	0	0	1	8	31	0	0	5	1	0	0	8	0	0	0	1	56	1	0	0	0	0	0	0	0	0	0	0	0	0	0	0	0	0	1	1	0	0	0	0	0	0	0	0	NA	NA	16.8	3.8	0.00100888782128273	0.000228200816718712	1.2	1.8	0	0	0.2	0.2	-1.48637781967687	FALSE	FALSE
"1"	101741442	101773149	"-"	"ENSRNOG00000021046_008i"	"ENSRNOG00000021046"	"Sult2b1"	31707	28	66	37	139	197	0	5	4	4	8	178	2	0	0	3	0	1	8	0	0	0	1	35	1	0	0	0	0	0	0	0	0	0	0	0	0	0	0	0	0	0	0	0	0	0	0	0	0	0	0	NA	NA	93.4	4.2	0.00294572176490996	0.000132462863090169	0.8	1.8	0	0	0	0	-3.10180681994547	FALSE	FALSE
"1"	101784876	101787687	"+"	"ENSRNOG00000021048_002i"	"ENSRNOG00000021048"	"AC095693.1"	2811	15	20	15	55	53	0	0	0	1	4	38	0	1	4	4	1	6	5	3	0	2	9	2	1	0	0	0	0	0	0	0	0	0	0	0	0	1	0	1	2	0	0	0	0	0	0	0	0	0	0	NA	NA	31.6	1	0.0112415510494486	0.000355745286374956	3.2	3.8	0	0	0.8	0	-3.45315712059287	TRUE	FALSE
"1"	101788083	101789389	"+"	"ENSRNOG00000021048_003i"	"ENSRNOG00000021048"	"AC095693.1"	1306	0	12	3	9	6	0	0	0	0	0	11	5	3	25	19	42	66	9	22	9	21	30	13	1	0	0	0	0	0	0	0	0	0	0	0	0	0	0	0	0	0	0	0	0	0	0	2	0	0	0	NA	NA	6	0	0.00459418070444104	0	31	18.2	0	0	0	0	-Inf	FALSE	FALSE
"1"	101789526	101789844	"+"	"ENSRNOG00000021048_004i"	"ENSRNOG00000021048"	"AC095693.1"	318	0	0	0	0	0	0	0	0	0	0	4	0	4	5	0	70	53	0	2	0	32	21	10	1	0	0	0	0	0	0	0	0	0	0	0	0	0	0	0	0	0	0	0	0	0	0	0	0	0	0	NA	NA	0	0	0	0	26.4	11	0	0	0	0	NA	FALSE	FALSE
"1"	101789983	101792297	"+"	"ENSRNOG00000021048_005i"	"ENSRNOG00000021048"	"AC095693.1"	2314	15	15	14	30	53	0	0	3	0	2	19	7	7	18	14	23	37	8	19	2	23	22	24	3	0	1	0	2	7	0	0	0	0	0	0	0	0	4	0	0	0	0	0	0	0	0	2	0	0	0	NA	NA	25.4	1	0.0109766637856525	0.000432152117545376	19.8	14.8	2	0	0.8	0	-3.23474917402449	TRUE	FALSE
"1"	101796615	101796702	"-"	"ENSRNOG00000021051_001i"	"ENSRNOG00000021051"	"Cyth2"	87	5	4	0	3	5	0	0	0	0	0	0	0	51	44	30	23	24	18	6	6	4	4	133	3	1	0	0	1	1	0	0	0	0	0	0	0	4	4	0	2	5	0	0	0	0	0	0	0	0	0	NA	NA	3.4	0	0.0390804597701149	0	34.4	7.6	0.6	0	3	0	-Inf	FALSE	FALSE
"1"	101796858	101796935	"-"	"ENSRNOG00000021051_002i"	"ENSRNOG00000021051"	"Cyth2"	77	2	3	0	5	3	0	0	0	0	0	2	0	5	10	21	6	3	5	5	5	2	0	150	12	2	2	0	3	3	0	0	0	0	0	1	0	0	3	0	2	1	0	0	0	0	0	0	0	0	0	NA	NA	2.6	0	0.0337662337662338	0	9	3.4	2	0	1.2	0	-Inf	FALSE	FALSE
"1"	101797008	101797096	"-"	"ENSRNOG00000021051_003i"	"ENSRNOG00000021051"	"Cyth2"	88	4	2	2	3	4	0	0	0	0	0	0	0	24	19	21	5	17	6	0	5	1	1	217	9	0	2	1	2	4	0	0	0	0	0	0	0	4	2	1	1	0	0	0	0	0	0	0	0	0	0	NA	NA	3	0	0.0340909090909091	0	17.2	2.6	1.8	0	1.6	0	-Inf	TRUE	FALSE
"1"	101797177	101799006	"-"	"ENSRNOG00000021051_004i"	"ENSRNOG00000021051"	"Cyth2"	1829	46	40	20	99	98	0	1	0	2	0	310	4	23	31	31	15	35	22	14	7	2	18	71	2	1	1	0	2	1	0	0	0	0	0	4	0	2	1	0	1	3	0	0	0	0	0	0	0	0	0	NA	NA	60.6	0.6	0.033132859486058	0.000328048113723346	27	12.6	1	0	1.4	0	-4.61512051684126	TRUE	FALSE
"1"	101799119	101799503	"-"	"ENSRNOG00000021051_005i"	"ENSRNOG00000021051"	"Cyth2"	384	43	41	19	145	133	0	0	0	0	6	3	0	50	72	47	66	87	8	44	12	16	27	63	0	1	0	0	1	0	0	0	0	0	0	1	0	14	10	7	36	32	0	0	0	0	4	0	0	0	0	14	NA	76.2	1.2	0.1984375	0.003125	64.4	21.4	0.4	0	19.8	0.8	-4.15103990589865	TRUE	FALSE
"1"	101799653	101799791	"-"	"ENSRNOG00000021051_006i"	"ENSRNOG00000021051"	"Cyth2"	138	2	0	0	2	5	0	0	0	0	0	0	0	15	38	20	16	23	21	11	5	4	5	229	5	0	0	0	0	2	0	0	0	0	0	0	0	0	0	0	1	0	0	0	0	0	0	0	0	0	0	NA	NA	1.8	0	0.0130434782608696	0	22.4	9.2	0.4	0	0.2	0	-Inf	FALSE	FALSE
"1"	101799905	101800475	"-"	"ENSRNOG00000021051_007i"	"ENSRNOG00000021051"	"Cyth2"	570	16	32	12	21	19	9	13	0	9	0	49	0	20	37	27	5	7	0	16	0	0	0	142	1	6	4	2	3	2	3	0	0	0	0	9	0	0	2	2	3	0	0	0	0	0	0	0	0	0	0	NA	NA	20	6.2	0.0350877192982456	0.0108771929824561	19.2	3.2	3.4	0.6	1.4	0	-1.17118298150295	TRUE	FALSE
"1"	101800557	101801135	"-"	"ENSRNOG00000021051_008i"	"ENSRNOG00000021051"	"Cyth2"	578	2	5	6	4	12	2	1	0	0	0	1	0	10	15	12	48	45	0	0	0	4	2	148	8	0	4	0	0	0	0	0	0	0	0	0	0	0	0	0	2	5	0	0	0	0	0	0	0	0	0	NA	NA	5.8	0.6	0.0100346020761246	0.00103806228373702	26	1.2	0.8	0	1.4	0	-2.26868354131836	TRUE	FALSE
"1"	101801255	101801793	"-"	"ENSRNOG00000021051_009i"	"ENSRNOG00000021051"	"Cyth2"	538	11	13	13	12	5	0	0	0	0	0	5	0	23	45	44	9	12	23	8	7	0	0	126	14	2	0	6	1	3	0	0	0	0	0	0	0	0	2	3	3	1	0	0	0	0	0	0	0	0	0	NA	NA	10.8	0	0.0200743494423792	0	26.6	7.6	2.4	0	1.8	0	-Inf	TRUE	FALSE
"1"	101801861	101801955	"-"	"ENSRNOG00000021051_010i"	"ENSRNOG00000021051"	"Cyth2"	94	2	13	5	3	1	0	0	0	0	0	0	0	17	28	35	6	18	14	9	2	0	0	49	10	0	6	2	1	0	0	0	0	0	0	0	0	2	10	3	2	1	0	0	0	0	0	0	0	0	0	NA	NA	4.8	0	0.051063829787234	0	20.8	5	1.8	0	3.6	0	-Inf	TRUE	FALSE
"1"	101802104	101802984	"-"	"ENSRNOG00000021051_011i"	"ENSRNOG00000021051"	"Cyth2"	880	55	68	51	41	48	3	0	2	1	1	68	2	4	9	15	0	2	5	7	3	0	1	103	14	0	0	0	0	0	0	0	0	0	1	0	0	4	13	2	3	0	0	0	0	0	0	2	0	0	0	NA	NA	52.6	1.4	0.0597727272727273	0.00159090909090909	6	3.2	0	0.2	4.4	0	-3.62624388312245	TRUE	FALSE
"1"	101807009	101808293	"-"	"ENSRNOG00000021056_001i"	"ENSRNOG00000021056"	"Kcnj14"	1284	1	2	1	5	2	0	0	0	0	0	6	0	4	1	1	0	1	0	0	0	0	0	1	0	0	0	0	0	0	0	0	0	0	0	0	0	0	2	0	1	0	0	0	0	0	0	0	0	0	0	NA	NA	2.2	0	0.00171339563862928	0	1.4	0	0	0	0.6	0	-Inf	FALSE	FALSE
"1"	101814201	101815202	"-"	"ENSRNOG00000021058_001i"	"ENSRNOG00000021058"	"Grwd1"	1001	0	2	0	12	8	0	0	0	0	0	9	0	2	4	8	1	3	0	0	4	0	0	35	4	0	0	0	0	1	0	0	0	0	0	0	0	0	0	0	0	1	0	0	0	0	0	1	0	0	0	NA	NA	4.4	0	0.0043956043956044	0	3.6	0.8	0.2	0	0.2	0	-Inf	FALSE	FALSE
"1"	101815401	101815587	"-"	"ENSRNOG00000021058_002i"	"ENSRNOG00000021058"	"Grwd1"	186	0	1	0	0	1	0	0	0	0	0	1	0	13	10	3	15	5	1	0	0	1	0	32	1	0	0	0	0	0	0	0	0	0	0	0	0	0	0	0	0	0	0	0	0	0	0	1	0	0	0	NA	NA	0.4	0	0.0021505376344086	0	9.2	0.4	0	0	0	0	-Inf	FALSE	FALSE
"1"	101815731	101815841	"-"	"ENSRNOG00000021058_003i"	"ENSRNOG00000021058"	"Grwd1"	110	0	0	0	0	1	0	0	0	0	0	10	0	5	5	0	5	4	0	0	0	6	1	7	3	0	0	0	0	0	0	0	0	0	0	0	0	0	0	0	0	1	0	0	0	0	0	2	0	0	0	NA	NA	0.2	0	0.00181818181818182	0	3.8	1.4	0	0	0.2	0	-Inf	FALSE	FALSE
"1"	101816056	101818108	"-"	"ENSRNOG00000021058_004i"	"ENSRNOG00000021058"	"Grwd1"	2052	11	23	11	36	30	0	0	2	1	1	18	0	0	4	0	1	0	0	0	0	0	0	21	2	1	1	0	10	6	0	0	0	0	1	0	0	0	0	1	0	3	0	0	0	0	0	0	0	0	0	NA	NA	22.2	0.8	0.0108187134502924	0.000389863547758285	1	0	3.6	0.2	0.8	0	-3.32323584019244	TRUE	FALSE
"1"	101818269	101818507	"-"	"ENSRNOG00000021058_005i"	"ENSRNOG00000021058"	"Grwd1"	238	1	2	1	4	0	0	0	0	0	0	0	0	7	9	4	3	0	0	0	1	0	0	4	0	1	1	1	1	0	0	0	0	0	0	0	0	0	0	0	0	0	0	0	0	0	0	0	0	0	0	NA	NA	1.6	0	0.00672268907563025	0	4.6	0.2	0.8	0	0	0	-Inf	FALSE	FALSE
"1"	101818626	101818816	"-"	"ENSRNOG00000021058_006i"	"ENSRNOG00000021058"	"Grwd1"	190	0	0	3	2	3	0	2	3	3	0	11	1	6	2	6	4	6	0	3	0	0	0	12	0	0	0	2	0	0	0	0	3	0	0	0	0	0	0	1	2	1	0	2	0	0	0	0	0	0	0	NA	NA	1.6	1.6	0.00842105263157895	0.00842105263157895	4.8	0.6	0.4	0.6	0.8	0.4	0	FALSE	FALSE
"1"	101822307	101822460	"-"	"ENSRNOG00000021063_004i"	"ENSRNOG00000021063"	"Grin2d"	153	0	0	0	0	0	0	0	0	0	0	0	1	4	5	0	7	0	1	2	0	0	0	3	0	0	0	0	0	0	0	0	0	0	0	0	0	0	0	0	0	0	0	0	0	0	0	0	0	0	0	NA	NA	0	0	0	0	3.2	0.6	0	0	0	0	NA	FALSE	FALSE
"1"	101822694	101822846	"-"	"ENSRNOG00000021063_005i"	"ENSRNOG00000021063"	"Grin2d"	152	0	0	0	0	0	0	0	0	0	0	0	0	0	0	0	0	1	0	0	0	0	0	8	2	0	0	0	0	0	0	0	0	0	0	0	0	0	0	0	0	0	0	0	0	0	0	0	0	0	0	NA	NA	0	0	0	0	0.2	0	0	0	0	0	NA	FALSE	FALSE
"1"	101823035	101839738	"-"	"ENSRNOG00000021063_006i"	"ENSRNOG00000021063"	"Grin2d"	16703	0	1	4	14	6	0	0	0	7	7	18	0	2	0	0	1	3	0	0	0	0	0	24	2	0	0	0	0	0	0	0	0	0	0	0	0	0	0	0	0	0	0	0	0	0	0	0	0	0	0	NA	NA	5	2.8	0.000299347422618691	0.000167634556666467	1.2	0	0	0	0	0	-0.579818495252942	FALSE	FALSE
"1"	101839900	101840766	"-"	"ENSRNOG00000021063_007i"	"ENSRNOG00000021063"	"Grin2d"	866	0	0	0	0	2	0	0	0	0	0	0	0	0	5	0	0	1	0	1	0	0	0	9	0	0	0	0	0	0	0	0	0	0	0	0	0	0	0	0	0	1	0	0	0	0	0	0	0	0	0	NA	NA	0.4	0	0.00046189376443418	0	1.2	0.2	0	0	0.2	0	-Inf	FALSE	FALSE
"1"	101840997	101841087	"-"	"ENSRNOG00000021063_008i"	"ENSRNOG00000021063"	"Grin2d"	90	0	0	0	0	0	0	0	0	0	0	0	0	0	0	0	1	0	0	0	0	0	0	22	0	0	0	0	0	0	0	0	0	0	0	0	0	0	0	0	0	0	0	0	0	0	0	0	0	0	0	NA	NA	0	0	0	0	0.2	0	0	0	0	0	NA	FALSE	FALSE
"1"	101841214	101843229	"-"	"ENSRNOG00000021063_009i"	"ENSRNOG00000021063"	"Grin2d"	2015	0	0	1	5	1	0	0	0	0	0	19	0	3	0	2	0	2	0	0	0	0	0	27	0	0	0	0	0	0	0	0	0	0	0	6	0	0	0	0	0	0	0	0	0	0	0	0	0	0	0	NA	NA	1.4	0	0.000694789081885856	0	1.4	0	0	0	0	0	-Inf	FALSE	FALSE
"1"	101843384	101843949	"-"	"ENSRNOG00000021063_010i"	"ENSRNOG00000021063"	"Grin2d"	565	0	0	0	1	1	0	0	0	0	3	3	0	3	0	0	0	0	0	0	0	0	0	28	0	0	0	0	0	0	0	0	0	0	0	0	0	0	0	0	1	0	0	0	0	0	3	1	0	0	0	NA	NA	0.4	0.6	0.000707964601769912	0.00106194690265487	0.6	0	0	0	0.2	0.6	0.405465108108164	FALSE	FALSE
"1"	101844119	101844358	"-"	"ENSRNOG00000021063_011i"	"ENSRNOG00000021063"	"Grin2d"	239	0	0	0	0	1	0	0	0	0	0	0	0	0	1	0	1	0	0	0	0	0	0	11	1	0	0	0	0	1	0	0	0	0	0	0	0	0	0	0	0	0	0	0	0	0	0	0	0	0	0	NA	NA	0.2	0	0.000836820083682008	0	0.4	0	0.2	0	0	0	-Inf	FALSE	FALSE
"1"	101844571	101844881	"-"	"ENSRNOG00000021063_012i"	"ENSRNOG00000021063"	"Grin2d"	310	0	0	0	1	0	0	0	0	0	0	0	0	0	2	0	1	1	0	4	0	0	0	19	0	0	0	0	0	0	0	0	0	0	0	0	0	0	0	0	0	0	0	0	0	0	0	0	0	0	0	NA	NA	0.2	0	0.000645161290322581	0	0.8	0.8	0	0	0	0	-Inf	FALSE	FALSE
"1"	101844997	101848432	"-"	"ENSRNOG00000021063_013i"	"ENSRNOG00000021063"	"Grin2d"	3435	0	0	0	1	2	0	0	0	0	0	0	0	0	0	1	4	0	0	0	0	0	0	10	0	0	0	0	0	0	0	0	0	0	0	0	0	0	0	0	0	0	0	0	0	0	0	0	0	0	0	NA	NA	0.6	0	0.000174672489082969	0	1	0	0	0	0	0	-Inf	FALSE	FALSE
"1"	101849053	101852570	"-"	"ENSRNOG00000021063_014i"	"ENSRNOG00000021063"	"Grin2d"	3517	0	3	0	0	0	0	0	0	0	0	2	0	0	0	0	0	0	0	0	0	0	0	8	4	0	0	0	0	0	0	0	0	0	0	0	0	0	0	0	0	0	0	0	0	0	0	0	0	0	0	NA	NA	0.6	0	0.000170599943133352	0	0	0	0	0	0	0	-Inf	FALSE	FALSE
"1"	101853056	101856164	"-"	"ENSRNOG00000021063_016i"	"ENSRNOG00000021063"	"Grin2d"	3108	11	4	4	68	42	0	0	0	20	7	51	15	0	0	0	0	0	0	0	0	0	0	0	2	0	0	0	0	0	0	0	0	0	0	0	0	0	0	0	1	0	0	0	0	0	0	0	1	0	0	NA	NA	25.8	5.4	0.0083011583011583	0.00173745173745174	0	0	0	0	0.2	0	-1.56397553835734	TRUE	FALSE
"1"	101859526	101860180	"+"	"ENSRNOG00000021082_001i"	"ENSRNOG00000021082"	"Kdelr1"	654	11	16	9	17	11	0	0	4	6	0	47	4	27	74	36	69	90	30	18	10	5	41	169	29	2	0	1	2	3	0	0	0	0	0	6	0	2	7	1	1	2	0	0	2	0	0	0	0	0	0	NA	NA	12.8	2	0.0195718654434251	0.00305810397553517	59.2	20.8	1.6	0	2.6	0.4	-1.85629799036563	TRUE	FALSE
"1"	101860282	101860457	"+"	"ENSRNOG00000021082_002i"	"ENSRNOG00000021082"	"Kdelr1"	175	0	3	0	2	0	0	0	0	0	0	0	0	7	29	7	7	9	19	4	4	3	4	218	14	0	2	0	1	0	0	0	0	0	0	0	0	0	1	0	1	0	0	0	0	0	0	0	0	0	0	NA	NA	1	0	0.00571428571428571	0	11.8	6.8	0.6	0	0.4	0	-Inf	FALSE	FALSE
"1"	101860617	101868280	"+"	"ENSRNOG00000021082_003i"	"ENSRNOG00000021082"	"Kdelr1"	7663	50	59	61	107	130	0	5	5	0	2	99	4	30	45	31	37	18	30	27	4	4	3	211	52	0	0	0	0	2	0	0	0	0	0	0	0	0	0	0	0	0	0	0	0	0	0	3	0	0	0	NA	NA	81.4	2.4	0.0106224716168602	0.000313193266344774	32.2	13.6	0.4	0	0	0	-3.52390653565459	TRUE	FALSE
"1"	101868534	101869484	"+"	"ENSRNOG00000021082_004i"	"ENSRNOG00000021082"	"Kdelr1"	950	6	3	4	11	10	0	0	0	0	0	22	0	12	22	15	20	13	5	1	2	4	0	268	21	3	0	0	8	2	0	0	0	0	0	0	0	0	0	0	0	0	0	0	0	0	0	1	0	0	0	NA	NA	6.8	0	0.00715789473684211	0	16.4	2.4	2.6	0	0	0	-Inf	TRUE	FALSE
"1"	101873446	101873681	"-"	"ENSRNOG00000021093_001i"	"ENSRNOG00000021093"	"Syngr4"	235	0	0	0	1	1	0	0	0	0	0	2	0	1	1	1	3	0	0	0	0	1	0	1	0	0	0	0	0	0	0	0	0	0	0	0	0	0	0	0	0	0	0	0	0	0	0	0	0	0	0	NA	NA	0.4	0	0.00170212765957447	0	1.2	0.2	0	0	0	0	-Inf	FALSE	FALSE
"1"	101873822	101874899	"-"	"ENSRNOG00000021093_002i"	"ENSRNOG00000021093"	"Syngr4"	1077	6	0	2	0	4	0	0	0	1	0	0	0	0	0	1	0	0	0	0	0	7	0	0	0	0	0	0	0	2	0	0	0	1	0	0	0	0	0	0	0	0	0	0	0	0	0	0	0	0	0	NA	NA	2.4	0.2	0.00222841225626741	0.000185701021355617	0.2	1.4	0.4	0.2	0	0	-2.484906649788	FALSE	FALSE
"1"	101875138	101882681	"-"	"ENSRNOG00000021093_003i"	"ENSRNOG00000021093"	"Syngr4"	7543	3	0	1	2	6	0	0	0	12	3	7	1	0	0	0	0	0	0	0	0	0	0	0	0	0	0	0	0	0	0	0	0	0	0	0	0	0	0	0	0	0	0	0	0	0	0	0	0	0	0	NA	NA	2.4	3	0.000318175792125149	0.000397719740156436	0	0	0	0	0	0	0.22314355131421	FALSE	FALSE
"1"	101882883	101883631	"-"	"ENSRNOG00000021093_004i"	"ENSRNOG00000021093"	"Syngr4"	748	0	0	0	2	0	0	0	0	0	0	0	0	1	0	1	0	0	0	0	0	0	0	1	0	0	0	0	0	0	0	0	0	0	0	0	0	0	0	0	0	0	0	0	0	0	0	0	0	0	0	NA	NA	0.4	0	0.00053475935828877	0	0.4	0	0	0	0	0	-Inf	FALSE	FALSE
"1"	101884145	101884275	"+"	"ENSRNOG00000021096_001i"	"ENSRNOG00000021096"	"Tmem143"	130	0	2	0	0	0	0	3	0	0	0	27	7	0	2	0	0	0	0	0	0	0	0	29	1	0	0	0	0	0	0	0	0	0	0	12	0	0	2	0	0	0	0	3	0	0	0	2	0	0	0	NA	NA	0.4	0.6	0.00307692307692308	0.00461538461538461	0.4	0	0	0	0.4	0.6	0.405465108108164	FALSE	FALSE
"1"	101884711	101886174	"+"	"ENSRNOG00000021096_003i"	"ENSRNOG00000021096"	"Tmem143"	1463	4	14	15	23	16	15	0	16	0	2	35	0	1	4	5	11	6	0	7	0	2	0	15	0	0	1	0	3	4	0	0	0	0	0	1	0	0	2	0	0	0	0	0	0	0	0	0	0	0	0	NA	NA	14.4	6.6	0.00984278879015721	0.00451127819548872	5.4	1.8	1.6	0	0.4	0	-0.780158557549575	TRUE	FALSE
"1"	101886280	101891724	"+"	"ENSRNOG00000021096_004i"	"ENSRNOG00000021096"	"Tmem143"	5444	9	16	1	13	24	0	0	0	0	0	22	0	4	4	5	7	4	0	0	1	1	0	34	0	0	0	0	0	0	0	0	0	0	0	0	0	7	0	0	0	0	0	0	0	0	0	0	0	0	0	NA	NA	12.6	0	0.00231447465099192	0	4.8	0.4	0	0	1.4	0	-Inf	FALSE	FALSE
"1"	101891920	101893076	"+"	"ENSRNOG00000021096_005i"	"ENSRNOG00000021096"	"Tmem143"	1156	1	1	4	0	1	0	0	0	0	0	0	0	0	6	3	2	0	0	0	0	0	0	10	2	0	1	0	0	0	0	0	0	0	0	0	0	0	0	0	0	0	0	0	0	0	0	0	0	0	0	NA	NA	1.4	0	0.00121107266435986	0	2.2	0	0.2	0	0	0	-Inf	FALSE	FALSE
"1"	101893208	101894306	"+"	"ENSRNOG00000021096_006i"	"ENSRNOG00000021096"	"Tmem143"	1098	0	4	6	3	5	0	0	0	0	0	7	0	0	3	1	0	1	0	0	0	0	0	13	0	0	3	1	0	2	0	0	0	0	0	1	0	0	0	0	0	0	0	0	0	0	0	1	0	0	0	NA	NA	3.6	0	0.00327868852459016	0	1	0	1.2	0	0	0	-Inf	FALSE	FALSE
"1"	101894587	101898634	"+"	"ENSRNOG00000021096_007i"	"ENSRNOG00000021096"	"Tmem143"	4047	7	5	11	42	32	1	5	1	6	8	173	0	1	2	4	8	3	5	8	3	3	0	17	3	0	0	2	1	0	0	5	1	0	1	0	0	0	0	0	0	3	1	0	0	0	0	0	0	0	0	NA	NA	19.4	4.2	0.00479367432666172	0.00103780578206079	3.6	3.8	0.6	1.4	0.6	0.2	-1.53018854077996	FALSE	FALSE
"1"	101898825	101899041	"+"	"ENSRNOG00000021096_008i"	"ENSRNOG00000021096"	"Tmem143"	216	2	0	4	10	16	0	0	0	0	0	7	0	0	6	3	2	1	8	0	0	0	0	7	0	0	0	0	0	2	0	0	0	0	0	0	0	1	0	2	0	1	0	0	0	0	0	3	0	0	0	NA	NA	6.4	0	0.0296296296296296	0	2.4	1.6	0.4	0	0.8	0	-Inf	FALSE	FALSE
"1"	101899461	101899960	"+"	"ENSRNOG00000021096_010i"	"ENSRNOG00000021096"	"Tmem143"	499	16	23	16	36	44	9	10	13	34	16	511	0	0	0	0	0	0	0	0	0	0	0	0	0	5	0	3	0	8	5	0	0	1	1	6	0	6	7	6	17	12	0	5	4	17	7	8	0	0	0	NA	NA	27	16.4	0.0541082164328657	0.0328657314629258	0	0	3.2	1.4	9.6	6.6	-0.498555531174176	TRUE	TRUE
"1"	101900941	101901943	"-"	"ENSRNOG00000021104_001i"	"ENSRNOG00000021104"	"Emp3"	1002	1	0	0	1	0	0	0	0	0	0	0	0	0	6	0	0	0	0	0	0	0	0	1	0	0	0	0	0	0	0	0	0	0	0	0	0	0	0	0	0	0	0	0	0	0	0	0	0	0	0	NA	NA	0.4	0	0.000399201596806387	0	1.2	0	0	0	0	0	-Inf	FALSE	FALSE
"1"	101902085	101902547	"-"	"ENSRNOG00000021104_002i"	"ENSRNOG00000021104"	"Emp3"	462	0	0	0	0	0	0	0	0	0	0	0	0	3	1	2	1	0	0	0	2	0	0	3	0	0	0	0	0	0	0	0	0	0	0	0	0	0	0	0	0	0	0	0	0	0	0	0	0	0	0	NA	NA	0	0	0	0	1.4	0.4	0	0	0	0	NA	FALSE	FALSE
"1"	101902651	101902862	"-"	"ENSRNOG00000021104_003i"	"ENSRNOG00000021104"	"Emp3"	211	0	0	0	0	0	0	0	3	0	0	0	0	2	0	0	0	0	0	2	0	0	0	6	1	0	0	0	0	0	0	0	0	0	0	0	0	0	0	0	0	0	0	0	0	0	0	0	0	0	0	NA	NA	0	0.6	0	0.0028436018957346	0.4	0.4	0	0	0	0	Inf	FALSE	FALSE
"1"	101903100	101903870	"-"	"ENSRNOG00000021104_004i"	"ENSRNOG00000021104"	"Emp3"	770	4	0	0	3	0	5	0	0	1	0	3	1	0	0	2	0	0	0	0	0	0	0	0	0	0	0	0	0	0	0	0	0	0	0	0	0	4	0	0	2	0	5	0	0	0	0	1	0	0	0	NA	NA	1.4	1.2	0.00181818181818182	0.00155844155844156	0.4	0	0	0	1.2	1	-0.154150679827258	FALSE	FALSE
"1"	101907052	101907154	"+"	"ENSRNOG00000021109_001i"	"ENSRNOG00000021109"	"Ccdc114"	102	3	3	1	0	0	0	0	0	0	0	13	3	5	0	0	0	0	0	0	0	0	0	0	0	2	3	1	0	0	0	0	0	0	0	0	1	1	0	0	0	0	0	0	0	0	0	1	0	0	0	NA	NA	1.4	0	0.0137254901960784	0	1	0	1.2	0	0.2	0	-Inf	FALSE	FALSE
"1"	101907247	101910993	"+"	"ENSRNOG00000021109_002i"	"ENSRNOG00000021109"	"Ccdc114"	3746	0	13	18	8	6	0	0	0	0	0	9	0	1	3	0	0	0	0	2	0	0	0	0	1	0	0	1	0	2	0	0	0	0	0	0	0	0	0	0	0	0	0	0	0	0	0	0	0	0	0	NA	NA	9	0	0.00240256273358249	0	0.8	0.4	0.6	0	0	0	-Inf	FALSE	FALSE
"1"	101911094	101911453	"+"	"ENSRNOG00000021109_003i"	"ENSRNOG00000021109"	"Ccdc114"	359	0	0	0	1	0	0	0	0	0	0	0	0	6	8	0	0	0	0	0	0	0	0	1	0	0	0	0	0	0	0	0	0	0	0	0	0	0	0	0	1	0	0	0	0	0	0	0	0	0	0	NA	NA	0.2	0	0.000557103064066852	0	2.8	0	0	0	0.2	0	-Inf	FALSE	FALSE
"1"	101911644	101917927	"+"	"ENSRNOG00000021109_004i"	"ENSRNOG00000021109"	"Ccdc114"	6283	8	20	10	12	6	0	0	0	0	2	7	0	0	0	0	0	0	0	0	0	0	0	0	0	0	0	0	0	0	0	0	0	0	0	0	0	0	0	0	0	0	0	0	0	0	0	0	0	0	0	NA	NA	11.2	0.4	0.00178258793569951	6.3663854846411e-05	0	0	0	0	0	0	-3.3322045101752	FALSE	FALSE
"1"	101918051	101918256	"+"	"ENSRNOG00000021109_005i"	"ENSRNOG00000021109"	"Ccdc114"	205	1	0	0	0	0	0	0	0	0	0	0	0	1	4	3	4	0	0	0	0	0	0	0	0	1	0	0	0	0	0	0	0	0	0	0	0	0	0	0	0	0	0	0	0	0	0	0	0	0	0	NA	NA	0.2	0	0.000975609756097561	0	2.4	0	0.2	0	0	0	-Inf	FALSE	FALSE
"1"	101918371	101921954	"+"	"ENSRNOG00000021109_006i"	"ENSRNOG00000021109"	"Ccdc114"	3583	6	26	11	44	9	0	0	0	1	3	1	0	0	0	0	0	0	0	0	0	0	0	0	0	0	0	0	0	0	0	0	0	0	0	0	0	0	7	0	0	0	0	0	0	0	0	0	0	0	0	NA	NA	19.2	0.8	0.0053586380128384	0.000223276583868267	0	0	0	0	1.4	0	-3.17805383034795	TRUE	FALSE
"1"	101922023	101925896	"+"	"ENSRNOG00000021109_007i"	"ENSRNOG00000021109"	"Ccdc114"	3873	3	6	12	15	9	0	0	0	0	4	1	0	0	3	2	0	0	0	0	0	0	0	0	1	0	3	0	0	0	0	0	0	0	0	0	0	2	0	1	0	0	0	0	0	0	0	0	0	0	0	NA	NA	9	0.8	0.00232378001549187	0.000206558223599277	1	0	0.6	0	0.6	0	-2.42036812865043	FALSE	FALSE
"1"	101926085	101926294	"+"	"ENSRNOG00000021109_008i"	"ENSRNOG00000021109"	"Ccdc114"	209	0	0	0	0	0	0	0	0	0	0	0	0	3	2	4	0	0	4	0	0	0	0	2	0	0	0	0	0	0	0	0	0	0	0	0	0	0	0	0	0	0	0	0	0	0	0	0	0	0	0	NA	NA	0	0	0	0	1.8	0.8	0	0	0	0	NA	FALSE	FALSE
"1"	101926430	101926802	"+"	"ENSRNOG00000021109_009i"	"ENSRNOG00000021109"	"Ccdc114"	372	2	0	3	1	0	0	0	0	0	0	0	0	4	0	4	0	0	0	0	0	0	0	0	0	0	0	0	0	0	0	0	0	0	0	0	0	1	0	0	0	0	0	0	0	0	0	0	0	0	0	NA	NA	1.2	0	0.0032258064516129	0	1.6	0	0	0	0.2	0	-Inf	FALSE	FALSE
"1"	101926886	101926986	"+"	"ENSRNOG00000021109_010i"	"ENSRNOG00000021109"	"Ccdc114"	100	1	0	1	1	0	0	0	0	0	0	0	0	0	0	0	0	0	0	0	0	0	0	1	0	1	0	1	1	0	0	0	0	0	0	0	0	0	0	0	0	0	0	0	0	0	0	0	0	0	0	NA	NA	0.6	0	0.006	0	0	0	0.6	0	0	0	-Inf	FALSE	FALSE
"1"	101927156	101931406	"+"	"ENSRNOG00000021109_011i"	"ENSRNOG00000021109"	"Ccdc114"	4250	1	0	2	11	5	0	0	0	0	0	0	0	3	8	1	1	0	0	2	8	0	0	5	0	0	0	0	2	0	0	0	0	0	0	0	0	0	0	0	0	0	0	0	0	0	0	0	0	0	0	NA	NA	3.8	0	0.000894117647058823	0	2.6	2	0.4	0	0	0	-Inf	FALSE	FALSE
"1"	101931571	101931646	"+"	"ENSRNOG00000021109_012i"	"ENSRNOG00000021109"	"Ccdc114"	75	0	3	0	0	1	0	0	0	0	0	1	0	12	4	5	0	1	0	6	0	0	0	0	0	0	0	0	0	0	0	0	0	0	0	0	0	0	3	0	0	1	0	0	0	0	0	1	0	0	0	NA	NA	0.8	0	0.0106666666666667	0	4.4	1.2	0	0	0.8	0	-Inf	FALSE	FALSE
"1"	101931745	101932000	"+"	"ENSRNOG00000021109_013i"	"ENSRNOG00000021109"	"Ccdc114"	255	0	1	0	0	0	0	0	0	0	0	0	0	0	0	0	0	0	0	2	0	0	0	1	0	0	0	0	0	0	0	0	0	0	0	0	0	0	0	0	0	0	0	0	0	0	0	0	0	0	0	NA	NA	0.2	0	0.000784313725490196	0	0	0.4	0	0	0	0	-Inf	FALSE	FALSE
"1"	101932080	101932159	"+"	"ENSRNOG00000021109_014i"	"ENSRNOG00000021109"	"Ccdc114"	79	0	0	2	0	0	0	0	0	0	0	0	0	0	2	1	5	0	0	0	0	0	0	0	0	0	0	0	0	0	0	0	0	0	0	0	0	0	0	2	0	0	0	0	0	0	0	0	0	0	0	NA	NA	0.4	0	0.00506329113924051	0	1.6	0	0	0	0.4	0	-Inf	FALSE	FALSE
"1"	101960844	101961149	"-"	"ENSRNOG00000028781_001i"	"ENSRNOG00000028781"	"Abcc6"	305	0	0	0	0	0	0	0	0	0	0	2	0	0	0	0	0	0	0	0	0	0	0	0	0	0	0	0	0	0	0	0	0	0	0	0	0	0	0	0	0	0	0	0	0	0	0	0	0	0	0	NA	NA	0	0	0	0	0	0	0	0	0	0	NA	FALSE	FALSE
"1"	101961345	101963422	"-"	"ENSRNOG00000028781_002i"	"ENSRNOG00000028781"	"Abcc6"	2077	0	0	0	0	0	0	0	0	0	2	1	0	0	0	0	0	0	0	0	0	0	0	0	0	0	0	0	0	0	0	0	0	0	0	0	0	0	0	0	0	0	0	0	0	0	0	0	0	0	0	NA	NA	0	0.4	0	0.000192585459797785	0	0	0	0	0	0	Inf	FALSE	FALSE
"1"	101963590	101963673	"-"	"ENSRNOG00000028781_003i"	"ENSRNOG00000028781"	"Abcc6"	83	0	0	0	0	0	0	0	0	0	0	0	0	0	0	0	0	0	0	0	0	0	0	1	0	0	0	0	0	0	0	0	0	0	0	0	0	0	0	0	0	0	0	0	0	0	0	0	0	0	0	NA	NA	0	0	0	0	0	0	0	0	0	0	NA	FALSE	FALSE
"1"	101963833	101964378	"-"	"ENSRNOG00000028781_004i"	"ENSRNOG00000028781"	"Abcc6"	545	0	0	0	0	0	0	0	0	0	0	0	0	0	0	0	0	0	0	0	0	0	0	0	0	0	0	0	0	0	0	0	0	0	0	0	0	0	0	0	0	0	0	0	0	0	0	0	0	0	0	NA	NA	0	0	0	0	0	0	0	0	0	0	NA	FALSE	FALSE
"1"	101964526	101965526	"-"	"ENSRNOG00000028781_005i"	"ENSRNOG00000028781"	"Abcc6"	1000	0	0	0	0	0	0	0	0	0	0	0	0	0	0	0	0	0	0	0	0	0	0	1	0	0	0	0	0	0	0	0	0	0	0	0	0	0	0	0	0	0	0	0	0	0	0	0	0	0	0	NA	NA	0	0	0	0	0	0	0	0	0	0	NA	FALSE	FALSE
"1"	101965629	101966542	"-"	"ENSRNOG00000028781_006i"	"ENSRNOG00000028781"	"Abcc6"	913	0	0	0	0	0	0	0	0	0	0	0	0	0	0	0	0	0	0	0	0	0	0	0	0	0	0	0	0	0	0	0	0	0	0	0	0	0	0	0	0	0	0	0	0	0	0	0	0	0	0	NA	NA	0	0	0	0	0	0	0	0	0	0	NA	FALSE	FALSE
"1"	101966670	101968260	"-"	"ENSRNOG00000028781_007i"	"ENSRNOG00000028781"	"Abcc6"	1590	0	0	0	0	0	0	0	0	0	0	0	0	0	0	0	0	0	0	0	0	0	0	0	0	0	0	0	0	0	0	0	0	0	0	0	0	0	0	0	0	0	0	0	0	0	0	0	0	0	0	NA	NA	0	0	0	0	0	0	0	0	0	0	NA	FALSE	FALSE
"1"	101968461	101969470	"-"	"ENSRNOG00000028781_008i"	"ENSRNOG00000028781"	"Abcc6"	1009	0	2	0	0	0	0	0	0	0	0	0	0	0	0	0	0	0	0	0	0	0	0	0	0	0	0	0	0	0	0	0	0	0	0	0	0	0	0	0	0	0	0	0	0	0	0	0	0	0	0	NA	NA	0.4	0	0.000396432111000991	0	0	0	0	0	0	0	-Inf	FALSE	FALSE
"1"	101969782	101972717	"-"	"ENSRNOG00000028781_009i"	"ENSRNOG00000028781"	"Abcc6"	2935	0	0	0	0	1	0	0	0	0	0	0	0	0	0	0	0	0	0	0	0	0	0	0	0	0	0	0	0	0	0	0	0	0	0	0	0	0	0	0	0	0	0	0	0	0	0	0	0	0	0	NA	NA	0.2	0	6.81431005110733e-05	0	0	0	0	0	0	0	-Inf	FALSE	FALSE
"1"	101972926	101973443	"-"	"ENSRNOG00000028781_010i"	"ENSRNOG00000028781"	"Abcc6"	517	0	0	0	0	0	0	0	0	0	0	0	0	0	0	0	0	0	0	0	0	0	0	2	0	0	0	0	0	0	0	0	0	0	0	0	0	0	0	0	0	0	0	0	0	0	0	0	0	0	0	NA	NA	0	0	0	0	0	0	0	0	0	0	NA	FALSE	FALSE
"1"	101973568	101976838	"-"	"ENSRNOG00000028781_011i"	"ENSRNOG00000028781"	"Abcc6"	3270	0	0	0	0	0	0	0	0	0	3	0	0	0	0	0	0	0	0	0	0	0	0	0	0	0	0	0	0	0	0	0	0	0	0	0	0	0	0	0	0	0	0	0	0	0	0	0	0	0	0	NA	NA	0	0.6	0	0.00018348623853211	0	0	0	0	0	0	Inf	FALSE	FALSE
"1"	101976915	101979258	"-"	"ENSRNOG00000028781_012i"	"ENSRNOG00000028781"	"Abcc6"	2343	0	0	0	0	0	0	0	0	0	0	0	0	0	0	0	0	0	0	0	0	0	0	0	0	0	0	0	0	0	0	0	0	0	0	0	0	0	0	0	0	0	0	0	0	0	0	0	0	0	0	NA	NA	0	0	0	0	0	0	0	0	0	0	NA	FALSE	FALSE
"1"	101979434	101979835	"-"	"ENSRNOG00000028781_013i"	"ENSRNOG00000028781"	"Abcc6"	401	0	0	0	0	0	0	0	0	0	0	0	0	0	0	0	0	0	0	0	0	0	0	0	0	0	0	0	0	0	0	0	0	0	0	0	0	0	0	0	0	0	0	0	0	0	0	0	0	0	0	NA	NA	0	0	0	0	0	0	0	0	0	0	NA	FALSE	FALSE
"1"	101980004	101981845	"-"	"ENSRNOG00000028781_014i"	"ENSRNOG00000028781"	"Abcc6"	1841	0	0	0	0	0	0	0	0	0	0	0	0	0	0	0	0	0	0	0	0	0	0	0	0	0	0	0	0	0	0	0	0	0	0	0	0	0	0	0	0	0	0	0	0	0	0	0	0	0	0	NA	NA	0	0	0	0	0	0	0	0	0	0	NA	FALSE	FALSE
"1"	101982023	101982201	"-"	"ENSRNOG00000028781_015i"	"ENSRNOG00000028781"	"Abcc6"	178	0	0	0	0	0	0	0	0	0	0	0	0	0	0	0	0	0	0	0	0	0	0	0	0	0	0	0	0	0	0	0	0	0	0	0	0	0	0	0	0	0	0	0	0	0	0	0	0	0	0	NA	NA	0	0	0	0	0	0	0	0	0	0	NA	FALSE	FALSE
"1"	101982329	101984132	"-"	"ENSRNOG00000028781_016i"	"ENSRNOG00000028781"	"Abcc6"	1803	0	0	0	0	0	0	0	0	0	0	0	0	0	0	0	0	0	0	0	0	0	0	0	0	0	0	0	0	0	0	0	0	0	0	0	0	0	0	0	0	0	0	0	0	0	0	0	0	0	0	NA	NA	0	0	0	0	0	0	0	0	0	0	NA	FALSE	FALSE
"1"	101984206	101985790	"-"	"ENSRNOG00000028781_017i"	"ENSRNOG00000028781"	"Abcc6"	1584	0	0	0	0	0	0	0	0	0	0	0	0	0	0	0	0	0	0	0	0	0	0	0	0	0	0	0	0	0	0	0	0	0	0	0	0	0	0	0	0	0	0	0	0	0	0	0	0	0	0	NA	NA	0	0	0	0	0	0	0	0	0	0	NA	FALSE	FALSE
"1"	101985879	101988908	"-"	"ENSRNOG00000028781_018i"	"ENSRNOG00000028781"	"Abcc6"	3029	0	0	0	0	0	0	0	0	0	0	1	0	0	0	0	0	0	0	0	0	0	0	0	0	0	0	0	0	0	0	0	0	0	0	0	0	0	0	0	0	0	0	0	0	0	0	0	0	0	0	NA	NA	0	0	0	0	0	0	0	0	0	0	NA	FALSE	FALSE
"1"	101989056	101989225	"-"	"ENSRNOG00000028781_019i"	"ENSRNOG00000028781"	"Abcc6"	169	0	0	0	0	0	0	0	0	0	0	0	0	0	0	0	0	0	0	0	0	0	0	0	0	0	0	0	0	0	0	0	0	0	0	0	0	0	0	0	0	0	0	0	0	0	0	0	0	0	0	NA	NA	0	0	0	0	0	0	0	0	0	0	NA	FALSE	FALSE
"1"	101989430	101992012	"-"	"ENSRNOG00000028781_020i"	"ENSRNOG00000028781"	"Abcc6"	2582	0	0	0	0	0	0	0	0	4	1	0	0	0	0	0	0	0	0	0	0	0	0	0	0	0	0	0	0	0	0	0	0	0	0	0	0	0	0	0	0	0	0	0	0	0	0	0	0	0	0	NA	NA	0	1	0	0.000387296669248644	0	0	0	0	0	0	Inf	FALSE	FALSE
"1"	101992106	101995678	"-"	"ENSRNOG00000028781_021i"	"ENSRNOG00000028781"	"Abcc6"	3572	0	0	0	0	0	0	0	0	0	1	0	0	0	0	0	0	0	0	0	0	0	0	0	0	0	0	0	0	0	0	0	0	0	0	0	0	0	0	0	0	0	0	0	0	0	0	0	0	0	0	NA	NA	0	0.2	0	5.59910414333707e-05	0	0	0	0	0	0	Inf	FALSE	FALSE
"1"	101995841	101997390	"-"	"ENSRNOG00000028781_022i"	"ENSRNOG00000028781"	"Abcc6"	1549	0	0	0	0	0	0	0	0	0	0	0	0	0	0	0	0	0	0	0	0	0	0	0	0	0	0	0	0	0	0	0	0	0	0	0	0	0	0	0	0	0	0	0	0	0	0	0	0	0	0	NA	NA	0	0	0	0	0	0	0	0	0	0	NA	FALSE	FALSE
"1"	101997569	101998889	"-"	"ENSRNOG00000028781_023i"	"ENSRNOG00000028781"	"Abcc6"	1320	0	0	0	0	0	0	0	0	0	0	0	0	0	0	0	0	0	0	0	0	0	0	0	0	0	0	0	0	0	0	0	0	0	0	0	0	0	0	0	0	0	0	0	0	0	0	0	0	0	0	NA	NA	0	0	0	0	0	0	0	0	0	0	NA	FALSE	FALSE
"1"	101999070	101999577	"-"	"ENSRNOG00000028781_024i"	"ENSRNOG00000028781"	"Abcc6"	507	0	0	0	0	0	0	0	0	0	0	0	0	0	0	0	0	0	0	0	0	0	0	0	0	0	0	0	0	0	0	0	0	0	0	0	0	0	0	0	0	0	0	0	0	0	0	0	0	0	0	NA	NA	0	0	0	0	0	0	0	0	0	0	NA	FALSE	FALSE
"1"	101999710	102000313	"-"	"ENSRNOG00000028781_025i"	"ENSRNOG00000028781"	"Abcc6"	603	0	0	0	0	0	0	0	0	0	0	0	0	0	0	0	0	0	0	0	0	0	0	0	0	0	0	0	0	0	0	0	0	0	0	0	0	0	0	0	0	0	0	0	0	0	0	0	0	0	0	NA	NA	0	0	0	0	0	0	0	0	0	0	NA	FALSE	FALSE
"1"	102000376	102001580	"-"	"ENSRNOG00000028781_026i"	"ENSRNOG00000028781"	"Abcc6"	1204	0	0	0	0	0	0	0	0	0	0	0	0	0	0	0	0	0	0	0	0	0	0	0	0	0	0	0	0	0	0	0	0	0	0	0	0	0	0	0	0	0	0	0	0	0	0	0	0	0	0	NA	NA	0	0	0	0	0	0	0	0	0	0	NA	FALSE	FALSE
"1"	102001707	102003817	"-"	"ENSRNOG00000028781_027i"	"ENSRNOG00000028781"	"Abcc6"	2110	0	0	0	0	0	0	0	0	0	2	0	0	0	0	0	0	0	0	0	0	0	0	0	0	0	0	0	0	0	0	0	0	0	0	0	0	0	0	0	0	0	0	0	0	0	0	0	0	0	0	NA	NA	0	0.4	0	0.00018957345971564	0	0	0	0	0	0	Inf	FALSE	FALSE
"1"	102003947	102004061	"-"	"ENSRNOG00000028781_028i"	"ENSRNOG00000028781"	"Abcc6"	114	0	0	0	0	0	0	0	0	0	0	0	0	0	0	0	0	0	0	0	0	0	0	0	0	0	0	0	0	0	0	0	0	0	0	0	0	0	0	0	0	0	0	0	0	0	0	0	0	0	0	NA	NA	0	0	0	0	0	0	0	0	0	0	NA	FALSE	FALSE
"1"	102004188	102012086	"-"	"ENSRNOG00000028781_029i"	"ENSRNOG00000028781"	"Abcc6"	7898	0	0	0	0	1	0	0	0	0	3	1	0	0	0	0	0	0	0	0	0	0	0	0	0	0	0	0	0	0	0	0	0	0	0	0	0	0	0	0	0	0	0	0	0	0	0	0	0	0	0	NA	NA	0.2	0.6	2.53228665484933e-05	7.59685996454799e-05	0	0	0	0	0	0	1.09861228866811	FALSE	FALSE
"1"	102012270	102013118	"-"	"ENSRNOG00000028781_030i"	"ENSRNOG00000028781"	"Abcc6"	848	0	0	0	0	0	0	0	0	0	0	0	0	0	0	0	0	0	0	0	0	0	0	0	0	0	0	0	0	0	0	0	0	0	0	0	0	0	0	0	0	0	0	0	0	0	0	0	0	0	0	NA	NA	0	0	0	0	0	0	0	0	0	0	NA	FALSE	FALSE
"1"	102017476	102023076	"+"	"ENSRNOG00000021118_001i"	"ENSRNOG00000021118"	"Nomo1"	5600	23	11	12	47	41	0	0	0	0	4	6	0	8	18	21	5	6	12	9	1	0	11	48	16	0	0	0	0	2	0	0	0	0	0	1	0	0	0	0	1	3	0	0	0	0	0	0	0	0	0	NA	NA	26.8	0.8	0.00478571428571429	0.000142857142857143	11.6	6.6	0.4	0	0.8	0	-3.51154543883102	FALSE	FALSE
"1"	102023167	102024042	"+"	"ENSRNOG00000021118_002i"	"ENSRNOG00000021118"	"Nomo1"	875	4	0	3	0	7	0	0	0	0	0	0	1	6	12	18	3	11	13	7	9	1	3	49	12	0	0	0	0	2	0	0	0	0	0	0	0	0	0	0	0	0	0	0	0	0	0	0	0	0	0	NA	NA	2.8	0	0.0032	0	10	6.6	0.4	0	0	0	-Inf	FALSE	FALSE
"1"	102024089	102026846	"+"	"ENSRNOG00000021118_003i"	"ENSRNOG00000021118"	"Nomo1"	2757	2	4	5	7	15	0	0	0	0	0	0	0	3	9	7	11	20	15	0	4	10	9	42	3	0	0	0	0	1	0	0	0	0	0	0	0	0	0	0	1	0	0	0	0	0	0	0	0	0	0	NA	NA	6.6	0	0.00239390642002176	0	10	7.6	0.2	0	0.2	0	-Inf	FALSE	FALSE
"1"	102026948	102027789	"+"	"ENSRNOG00000021118_004i"	"ENSRNOG00000021118"	"Nomo1"	841	3	6	8	4	15	0	0	0	0	0	0	0	6	14	16	13	8	4	19	6	17	3	28	5	0	0	0	1	3	0	0	0	0	0	0	0	0	0	0	0	0	0	0	0	0	0	0	0	0	0	NA	NA	7.2	0	0.00856123662306778	0	11.4	9.8	0.8	0	0	0	-Inf	TRUE	FALSE
"1"	102027897	102030456	"+"	"ENSRNOG00000021118_005i"	"ENSRNOG00000021118"	"Nomo1"	2559	5	0	7	31	29	0	0	0	0	1	0	0	5	5	14	3	12	0	3	10	11	12	44	7	0	0	0	0	0	0	0	0	0	0	0	0	0	0	0	0	0	0	0	0	0	0	0	0	0	0	NA	NA	14.4	0.2	0.00562719812426729	7.81555295037124e-05	7.8	7.2	0	0	0	0	-4.27666611901606	FALSE	FALSE
"1"	102030530	102031364	"+"	"ENSRNOG00000021118_006i"	"ENSRNOG00000021118"	"Nomo1"	834	0	0	0	2	4	3	0	0	0	0	0	0	12	25	23	7	9	2	19	5	4	14	23	8	0	0	0	0	3	0	0	0	0	0	0	0	0	0	0	0	0	0	0	0	0	0	0	0	0	0	NA	NA	1.2	0.6	0.00143884892086331	0.000719424460431655	15.2	8.8	0.6	0	0	0	-0.693147180559945	FALSE	FALSE
"1"	102031518	102031943	"+"	"ENSRNOG00000021118_007i"	"ENSRNOG00000021118"	"Nomo1"	425	0	1	0	3	2	0	0	0	0	4	0	0	8	17	8	4	2	0	5	4	0	0	35	3	0	1	0	0	0	0	0	0	0	0	0	0	0	0	0	0	0	0	0	0	0	0	0	0	0	0	NA	NA	1.2	0.8	0.00282352941176471	0.00188235294117647	7.8	1.8	0.2	0	0	0	-0.405465108108164	FALSE	FALSE
"1"	102032082	102033049	"+"	"ENSRNOG00000021118_008i"	"ENSRNOG00000021118"	"Nomo1"	967	0	1	1	4	7	0	0	0	0	0	0	0	12	17	11	6	3	0	15	1	0	0	36	0	0	0	0	0	0	0	0	0	0	0	0	0	0	0	0	2	0	0	0	0	0	0	0	0	0	0	NA	NA	2.6	0	0.00268872802481903	0	9.8	3.2	0	0	0.4	0	-Inf	FALSE	FALSE
"1"	102033140	102036377	"+"	"ENSRNOG00000021118_009i"	"ENSRNOG00000021118"	"Nomo1"	3237	1	0	9	8	9	0	0	0	0	1	0	0	13	24	7	9	8	14	20	2	6	9	20	4	0	0	0	0	0	0	0	0	0	0	0	0	0	0	0	0	0	0	0	0	0	0	0	0	0	0	NA	NA	5.4	0.2	0.00166821130676552	6.17856039542787e-05	12.2	10.2	0	0	0	0	-3.29583686600433	FALSE	FALSE
"1"	102036484	102036654	"+"	"ENSRNOG00000021118_010i"	"ENSRNOG00000021118"	"Nomo1"	170	0	0	0	0	0	0	0	0	0	0	0	0	24	28	32	21	28	7	15	15	11	18	47	4	0	0	0	0	0	0	0	0	0	0	0	0	0	0	0	0	0	0	0	0	0	0	0	0	0	0	NA	NA	0	0	0	0	26.6	13.2	0	0	0	0	NA	FALSE	FALSE
"1"	102036806	102041062	"+"	"ENSRNOG00000021118_011i"	"ENSRNOG00000021118"	"Nomo1"	4256	0	0	2	6	5	0	0	0	0	0	0	0	68	82	66	55	88	23	53	32	54	102	38	1	0	0	0	0	1	0	0	0	0	0	0	0	0	0	0	0	0	0	0	0	0	0	0	0	0	0	NA	NA	2.6	0	0.000610902255639098	0	71.8	52.8	0.2	0	0	0	-Inf	FALSE	FALSE
"1"	102041238	102043331	"+"	"ENSRNOG00000021118_012i"	"ENSRNOG00000021118"	"Nomo1"	2093	0	2	1	4	1	0	0	0	0	0	4	0	19	19	14	11	21	10	6	7	30	5	117	1	0	0	0	0	0	0	0	0	0	0	0	0	0	0	1	0	0	0	0	0	0	0	0	0	0	0	NA	NA	1.6	0	0.000764452938365982	0	16.8	11.6	0	0	0.2	0	-Inf	FALSE	FALSE
"1"	102043474	102043810	"+"	"ENSRNOG00000021118_013i"	"ENSRNOG00000021118"	"Nomo1"	336	0	0	0	2	0	0	0	0	0	0	0	0	20	35	17	11	22	25	24	18	8	18	32	2	0	0	0	0	0	0	0	0	0	0	0	0	0	0	0	0	0	0	0	0	0	0	0	0	0	0	NA	NA	0.4	0	0.00119047619047619	0	21	18.6	0	0	0	0	-Inf	FALSE	FALSE
"1"	102043943	102045007	"+"	"ENSRNOG00000021118_014i"	"ENSRNOG00000021118"	"Nomo1"	1064	6	6	5	11	10	0	0	0	0	0	1	0	12	5	12	2	2	8	7	13	2	0	62	1	0	0	0	0	0	0	0	0	0	0	0	0	0	0	0	0	1	0	0	0	0	0	0	0	0	0	NA	NA	7.6	0	0.00714285714285714	0	6.6	6	0	0	0.2	0	-Inf	TRUE	FALSE
"1"	102045145	102047665	"+"	"ENSRNOG00000021118_015i"	"ENSRNOG00000021118"	"Nomo1"	2520	0	1	6	1	10	0	0	0	0	0	1	0	8	21	8	1	7	1	19	6	2	3	37	3	0	0	4	0	1	0	0	0	0	0	0	0	0	0	0	0	0	0	0	0	0	0	0	0	0	0	NA	NA	3.6	0	0.00142857142857143	0	9	6.2	1	0	0	0	-Inf	FALSE	FALSE
"1"	102047754	102048524	"+"	"ENSRNOG00000021118_016i"	"ENSRNOG00000021118"	"Nomo1"	770	0	3	0	1	0	0	0	0	0	0	1	0	53	50	52	15	28	50	37	17	7	12	65	1	0	1	0	0	0	0	0	0	0	0	0	0	0	0	0	0	0	0	0	0	0	0	0	0	0	0	NA	NA	0.8	0	0.00103896103896104	0	39.6	24.6	0.2	0	0	0	-Inf	FALSE	FALSE
"1"	102048589	102049712	"+"	"ENSRNOG00000021118_017i"	"ENSRNOG00000021118"	"Nomo1"	1123	1	5	0	0	4	0	0	0	0	0	0	0	21	21	11	8	13	5	46	5	5	1	100	1	0	0	0	0	0	0	0	0	0	0	0	0	0	0	0	0	0	0	0	0	0	0	0	0	0	0	NA	NA	2	0	0.00178094390026714	0	14.8	12.4	0	0	0	0	-Inf	FALSE	FALSE
"1"	102049809	102052702	"+"	"ENSRNOG00000021118_018i"	"ENSRNOG00000021118"	"Nomo1"	2893	5	16	9	27	23	0	0	0	0	1	2	1	8	16	11	1	9	4	4	3	0	5	113	4	0	0	0	0	0	0	0	0	0	0	0	0	0	0	0	0	0	0	0	0	0	0	0	0	0	0	NA	NA	16	0.2	0.00553059108192188	6.91323885240235e-05	9	3.2	0	0	0	0	-4.38202663467388	TRUE	FALSE
"1"	102052922	102053004	"+"	"ENSRNOG00000021118_019i"	"ENSRNOG00000021118"	"Nomo1"	82	1	0	0	1	0	0	0	0	0	0	0	0	26	73	84	28	34	17	34	31	24	36	31	1	0	0	0	1	0	0	0	0	0	0	0	0	1	0	0	0	0	0	0	0	0	0	0	0	0	0	NA	NA	0.4	0	0.0048780487804878	0	49	28.4	0.2	0	0.2	0	-Inf	FALSE	FALSE
"1"	102053088	102054489	"+"	"ENSRNOG00000021118_020i"	"ENSRNOG00000021118"	"Nomo1"	1401	1	4	9	7	12	0	0	0	0	1	3	1	20	30	17	31	28	10	8	5	18	15	20	4	0	0	0	1	0	0	0	0	0	0	0	1	0	0	0	0	0	0	0	0	0	0	0	0	0	0	NA	NA	6.6	0.2	0.00471092077087794	0.000142755174875089	25.2	11.2	0.2	0	0	0	-3.49650756146648	FALSE	FALSE
"1"	102054650	102054779	"+"	"ENSRNOG00000021118_021i"	"ENSRNOG00000021118"	"Nomo1"	129	0	0	0	0	0	0	0	0	0	0	0	0	5	15	15	9	6	13	9	5	2	4	83	2	0	0	0	0	0	0	0	0	0	0	0	0	0	0	0	0	0	0	0	0	0	0	0	0	0	0	NA	NA	0	0	0	0	10	6.6	0	0	0	0	NA	FALSE	FALSE
"1"	102054907	102056310	"+"	"ENSRNOG00000021118_022i"	"ENSRNOG00000021118"	"Nomo1"	1403	3	4	0	5	14	0	0	0	0	0	0	0	15	37	30	13	13	22	17	7	2	28	41	2	3	0	0	0	0	0	0	0	0	0	0	0	0	0	0	0	2	0	0	0	0	0	0	0	0	0	NA	NA	5.2	0	0.00370634354953671	0	21.6	15.2	0.6	0	0.4	0	-Inf	FALSE	FALSE
"1"	102056425	102057202	"+"	"ENSRNOG00000021118_023i"	"ENSRNOG00000021118"	"Nomo1"	777	0	0	0	2	0	0	0	0	0	0	4	0	9	8	16	4	6	17	2	1	0	6	105	0	0	0	0	0	0	0	0	0	0	0	0	0	0	0	0	0	0	0	0	0	0	0	0	0	0	0	NA	NA	0.4	0	0.000514800514800515	0	8.6	5.2	0	0	0	0	-Inf	FALSE	FALSE
"1"	102057331	102059652	"+"	"ENSRNOG00000021118_024i"	"ENSRNOG00000021118"	"Nomo1"	2321	3	1	5	19	25	0	0	0	0	2	1	0	23	29	31	19	22	24	7	11	0	12	82	2	1	0	0	1	6	0	0	0	0	0	0	0	0	0	0	0	0	0	0	0	0	0	0	0	0	0	NA	NA	10.6	0.4	0.0045669969840586	0.0001723395088324	24.8	10.8	1.6	0	0	0	-3.27714473299218	FALSE	FALSE
"1"	102059795	102060858	"+"	"ENSRNOG00000021118_025i"	"ENSRNOG00000021118"	"Nomo1"	1063	1	1	1	3	0	0	0	1	0	0	0	0	13	11	16	10	7	7	12	20	2	3	61	2	0	0	0	0	0	0	0	1	0	0	0	0	0	0	0	0	0	0	0	0	0	0	0	0	0	0	NA	NA	1.2	0.2	0.00112888052681091	0.000188146754468485	11.4	8.8	0	0.2	0	0	-1.79175946922805	FALSE	FALSE
"1"	102060943	102062785	"+"	"ENSRNOG00000021118_026i"	"ENSRNOG00000021118"	"Nomo1"	1842	0	3	2	5	12	0	0	0	0	0	0	0	5	13	20	15	8	6	21	2	0	2	22	2	0	0	0	0	0	0	0	0	0	0	0	0	0	0	0	0	0	0	0	0	0	0	0	0	0	0	NA	NA	4.4	0	0.00238870792616721	0	12.2	6.2	0	0	0	0	-Inf	FALSE	FALSE
"1"	102062897	102064317	"+"	"ENSRNOG00000021118_027i"	"ENSRNOG00000021118"	"Nomo1"	1420	0	1	0	7	5	0	0	0	0	0	3	0	21	28	37	22	30	19	30	11	14	25	80	3	0	0	0	0	0	0	0	0	0	0	1	0	0	0	0	1	3	0	0	0	0	0	0	0	0	0	NA	NA	2.6	0	0.00183098591549296	0	27.6	19.8	0	0	0.8	0	-Inf	FALSE	FALSE
"1"	102064420	102066045	"+"	"ENSRNOG00000021118_028i"	"ENSRNOG00000021118"	"Nomo1"	1625	5	7	2	28	19	1	0	0	1	0	11	0	40	31	27	36	37	70	30	45	33	16	125	5	0	0	0	0	0	0	0	0	0	0	0	0	4	0	0	4	5	0	0	0	1	0	0	0	0	0	NA	NA	12.2	0.4	0.00750769230769231	0.000246153846153846	34.2	38.8	0	0	2.6	0.2	-3.41772668361337	TRUE	FALSE
"1"	102066166	102067870	"+"	"ENSRNOG00000021118_029i"	"ENSRNOG00000021118"	"Nomo1"	1704	0	9	4	5	8	0	3	3	0	1	7	0	21	25	25	9	12	22	4	4	4	4	146	7	0	0	0	0	1	0	0	0	0	0	0	0	0	0	1	0	1	0	3	3	0	0	1	0	0	0	NA	NA	5.2	1.4	0.00305164319248826	0.000821596244131455	18.4	7.6	0.2	0	0.4	1.2	-1.31218638896617	FALSE	FALSE
"1"	102067964	102068254	"+"	"ENSRNOG00000021118_030i"	"ENSRNOG00000021118"	"Nomo1"	290	0	0	0	0	0	0	0	0	0	0	0	0	10	20	19	7	6	0	5	2	0	13	49	1	0	0	0	0	0	0	0	0	0	0	0	0	0	0	0	0	0	0	0	0	0	0	0	0	0	0	NA	NA	0	0	0	0	12.4	4	0	0	0	0	NA	FALSE	FALSE
"1"	102087376	102088583	"+"	"ENSRNOG00000053946_001i"	"ENSRNOG00000053946"	"AC120807.1"	1207	0	0	0	0	0	0	0	0	0	0	0	0	0	0	0	0	0	0	0	0	0	0	0	0	0	0	0	0	0	0	0	0	0	0	0	0	0	0	0	0	0	0	0	0	0	0	0	0	0	0	NA	NA	0	0	0	0	0	0	0	0	0	0	NA	FALSE	FALSE
"1"	102110846	102111560	"-"	"ENSRNOG00000021130_001i"	"ENSRNOG00000021130"	"Abcc8"	714	0	0	4	0	0	0	0	0	0	0	0	0	1	0	0	2	0	0	0	0	0	0	18	0	0	0	0	0	0	0	0	0	0	0	0	0	0	0	0	0	0	0	0	0	0	0	0	0	0	0	NA	NA	0.8	0	0.00112044817927171	0	0.6	0	0	0	0	0	-Inf	FALSE	FALSE
"1"	102111624	102111891	"-"	"ENSRNOG00000021130_002i"	"ENSRNOG00000021130"	"Abcc8"	267	0	2	0	0	1	0	0	0	0	0	0	1	1	1	0	1	4	0	0	0	0	0	24	0	0	0	0	0	0	0	0	0	0	0	0	0	0	0	0	0	1	0	0	0	0	0	0	0	0	0	NA	NA	0.6	0	0.00224719101123595	0	1.4	0	0	0	0.2	0	-Inf	FALSE	FALSE
"1"	102112026	102112642	"-"	"ENSRNOG00000021130_003i"	"ENSRNOG00000021130"	"Abcc8"	616	0	1	1	1	4	0	0	0	0	0	3	0	1	4	0	0	0	0	0	0	0	0	11	0	0	0	0	0	0	0	0	0	0	0	0	0	0	0	0	0	0	0	0	0	0	0	0	0	0	0	NA	NA	1.4	0	0.00227272727272727	0	1	0	0	0	0	0	-Inf	FALSE	FALSE
"1"	102112747	102113000	"-"	"ENSRNOG00000021130_004i"	"ENSRNOG00000021130"	"Abcc8"	253	0	0	0	1	0	0	0	0	0	0	0	0	0	7	0	2	2	0	0	0	0	0	11	0	0	0	0	0	0	0	0	0	0	0	0	0	0	0	0	0	0	0	0	0	0	0	0	0	0	0	NA	NA	0.2	0	0.000790513833992095	0	2.2	0	0	0	0	0	-Inf	FALSE	FALSE
"1"	102113110	102113280	"-"	"ENSRNOG00000021130_005i"	"ENSRNOG00000021130"	"Abcc8"	170	1	0	1	0	1	0	0	0	0	0	0	0	4	2	1	7	4	1	1	0	3	0	4	0	1	0	1	0	0	0	0	0	0	0	0	0	0	0	0	0	0	0	0	0	0	0	0	0	0	0	NA	NA	0.6	0	0.00352941176470588	0	3.6	1	0.4	0	0	0	-Inf	FALSE	FALSE
"1"	102113360	102114161	"-"	"ENSRNOG00000021130_006i"	"ENSRNOG00000021130"	"Abcc8"	801	5	1	0	8	11	0	0	0	0	0	0	0	0	0	0	2	2	0	0	2	0	0	13	0	0	0	0	0	0	0	0	0	0	0	0	0	1	0	0	4	0	0	0	0	0	0	0	0	0	0	NA	NA	5	0	0.00624219725343321	0	0.8	0.4	0	0	1	0	-Inf	FALSE	FALSE
"1"	102114293	102114394	"-"	"ENSRNOG00000021130_007i"	"ENSRNOG00000021130"	"Abcc8"	101	0	0	0	0	0	0	0	0	0	0	0	0	0	0	0	0	1	3	0	0	0	0	16	0	0	0	0	0	0	0	0	0	0	0	0	0	0	0	0	0	0	0	0	0	0	0	0	0	0	0	NA	NA	0	0	0	0	0.2	0.6	0	0	0	0	NA	FALSE	FALSE
"1"	102114516	102114843	"-"	"ENSRNOG00000021130_008i"	"ENSRNOG00000021130"	"Abcc8"	327	0	0	0	2	1	0	0	0	0	0	0	0	0	0	0	1	0	0	0	2	0	0	11	0	0	0	0	2	0	0	0	0	0	0	0	0	0	0	0	0	0	0	0	0	0	0	0	0	0	0	NA	NA	0.6	0	0.0018348623853211	0	0.2	0.4	0.4	0	0	0	-Inf	FALSE	FALSE
"1"	102114958	102115645	"-"	"ENSRNOG00000021130_009i"	"ENSRNOG00000021130"	"Abcc8"	687	1	3	3	3	6	0	0	2	1	0	9	0	0	1	2	4	3	5	9	2	0	2	9	0	0	0	1	0	0	0	0	0	0	0	0	0	0	0	1	0	3	0	0	0	1	0	0	0	0	0	NA	NA	3.2	0.6	0.00465793304221252	0.000873362445414847	2	3.6	0.2	0	0.8	0.2	-1.67397643357167	FALSE	FALSE
"1"	102115749	102119188	"-"	"ENSRNOG00000021130_010i"	"ENSRNOG00000021130"	"Abcc8"	3439	4	5	3	17	14	0	0	0	1	0	8	0	0	3	3	51	59	0	0	0	13	30	1	0	0	0	0	0	0	0	0	0	0	0	0	0	0	0	0	3	1	0	0	0	0	0	0	0	0	0	NA	NA	8.6	0.2	0.00250072695551032	5.81564408258215e-05	23.2	8.6	0	0	0.8	0	-3.76120011569356	FALSE	FALSE
"1"	102119282	102121406	"-"	"ENSRNOG00000021130_011i"	"ENSRNOG00000021130"	"Abcc8"	2124	2	5	1	10	10	0	0	0	0	0	12	0	0	1	1	2	5	2	0	0	5	6	16	0	0	0	0	0	0	0	0	0	0	0	0	0	0	2	0	1	0	0	0	0	0	0	2	0	0	0	NA	NA	5.6	0	0.00263653483992467	0	1.8	2.6	0	0	0.6	0	-Inf	FALSE	FALSE
"1"	102121565	102122001	"-"	"ENSRNOG00000021130_012i"	"ENSRNOG00000021130"	"Abcc8"	436	0	0	1	0	1	0	0	0	0	0	0	0	5	7	0	8	5	9	0	0	6	8	16	0	0	0	0	0	0	0	0	0	0	0	0	0	0	0	1	0	0	0	0	0	0	0	0	0	0	0	NA	NA	0.4	0	0.000917431192660551	0	5	4.6	0	0	0.2	0	-Inf	FALSE	FALSE
"1"	102122072	102123084	"-"	"ENSRNOG00000021130_013i"	"ENSRNOG00000021130"	"Abcc8"	1012	0	0	1	2	6	0	0	0	0	0	0	0	15	0	4	0	4	0	3	0	0	0	24	0	0	0	0	0	0	0	0	0	0	0	0	0	0	0	0	0	0	0	0	0	0	0	0	0	0	0	NA	NA	1.8	0	0.00177865612648221	0	4.6	0.6	0	0	0	0	-Inf	FALSE	FALSE
"1"	102123252	102123439	"-"	"ENSRNOG00000021130_014i"	"ENSRNOG00000021130"	"Abcc8"	187	0	0	0	0	0	0	0	0	0	0	0	0	0	0	0	2	2	0	0	0	1	0	12	0	0	0	0	0	0	0	0	0	0	0	0	0	0	0	0	0	0	0	0	0	0	0	0	0	0	0	NA	NA	0	0	0	0	0.8	0.2	0	0	0	0	NA	FALSE	FALSE
"1"	102123682	102124228	"-"	"ENSRNOG00000021130_015i"	"ENSRNOG00000021130"	"Abcc8"	546	0	0	1	0	1	0	0	0	0	0	0	0	0	2	2	1	1	0	0	0	0	0	5	0	0	0	0	0	0	0	0	0	0	0	0	0	0	0	0	0	0	0	0	0	0	0	0	0	0	0	NA	NA	0.4	0	0.000732600732600733	0	1.2	0	0	0	0	0	-Inf	FALSE	FALSE
"1"	102124329	102125183	"-"	"ENSRNOG00000021130_016i"	"ENSRNOG00000021130"	"Abcc8"	854	1	0	1	1	4	0	0	0	0	0	3	1	0	3	3	0	3	0	0	0	0	0	11	1	0	0	0	0	0	0	0	0	0	0	0	0	0	0	0	0	1	0	0	0	0	0	0	0	0	0	NA	NA	1.4	0	0.00163934426229508	0	1.8	0	0	0	0.2	0	-Inf	FALSE	FALSE
"1"	102125310	102126593	"-"	"ENSRNOG00000021130_017i"	"ENSRNOG00000021130"	"Abcc8"	1283	0	3	4	10	6	0	0	0	0	0	0	0	3	3	1	1	1	0	0	0	0	0	15	0	0	0	0	0	0	0	0	0	0	0	0	0	0	0	0	0	0	0	0	0	0	0	0	0	0	0	NA	NA	4.6	0	0.00358534684333593	0	1.8	0	0	0	0	0	-Inf	FALSE	FALSE
"1"	102126732	102128247	"-"	"ENSRNOG00000021130_018i"	"ENSRNOG00000021130"	"Abcc8"	1515	1	10	3	3	5	0	0	0	0	0	0	0	5	2	0	4	2	10	0	0	0	0	7	0	0	5	0	2	4	0	0	0	0	0	0	0	0	1	0	0	0	0	0	0	0	0	0	0	0	0	NA	NA	4.4	0	0.0029042904290429	0	2.6	2	2.2	0	0.2	0	-Inf	FALSE	FALSE
"1"	102128329	102128965	"-"	"ENSRNOG00000021130_019i"	"ENSRNOG00000021130"	"Abcc8"	636	4	0	3	1	2	0	0	0	0	0	0	0	6	8	8	9	16	0	0	0	0	15	12	0	0	0	0	0	0	0	0	0	0	0	0	0	0	0	0	0	0	0	0	0	0	0	0	0	0	0	NA	NA	2	0	0.00314465408805031	0	9.4	3	0	0	0	0	-Inf	FALSE	FALSE
"1"	102129051	102129990	"-"	"ENSRNOG00000021130_020i"	"ENSRNOG00000021130"	"Abcc8"	939	0	0	1	2	2	0	0	0	0	0	0	0	0	1	2	3	2	5	0	0	0	7	8	0	0	0	0	0	0	0	0	0	0	0	0	0	0	0	0	0	0	0	0	0	0	0	0	0	0	0	NA	NA	1	0	0.00106496272630458	0	1.6	2.4	0	0	0	0	-Inf	FALSE	FALSE
"1"	102130090	102130987	"-"	"ENSRNOG00000021130_021i"	"ENSRNOG00000021130"	"Abcc8"	897	13	0	3	2	6	0	0	0	0	0	1	0	0	0	0	0	1	0	0	0	0	0	1	0	0	0	0	0	0	0	0	0	0	0	0	0	0	0	0	0	0	0	0	0	0	0	0	0	0	0	NA	NA	4.8	0	0.00535117056856187	0	0.2	0	0	0	0	0	-Inf	FALSE	FALSE
"1"	102131027	102133084	"-"	"ENSRNOG00000021130_022i"	"ENSRNOG00000021130"	"Abcc8"	2057	0	7	1	8	6	0	0	0	1	0	0	0	0	1	1	2	1	0	0	2	0	0	8	0	0	0	0	0	1	0	0	0	0	0	0	0	0	2	0	0	0	0	0	0	0	0	0	0	0	0	NA	NA	4.4	0.2	0.00213903743315508	9.72289742343218e-05	1	0.4	0.2	0	0.4	0	-3.09104245335832	FALSE	FALSE
"1"	102133118	102141864	"-"	"ENSRNOG00000021130_023i"	"ENSRNOG00000021130"	"Abcc8"	8746	8	11	5	26	59	0	0	0	0	14	3	0	1	1	1	4	2	0	0	2	1	0	2	0	0	0	0	0	1	0	0	0	0	0	0	0	0	0	0	0	0	0	0	0	0	0	0	0	0	0	21	NA	21.8	2.8	0.00249256803109993	0.00032014635261834	1.8	0.6	0.2	0	0	0	-2.05229055261389	FALSE	FALSE
"1"	102141971	102142525	"-"	"ENSRNOG00000021130_024i"	"ENSRNOG00000021130"	"Abcc8"	554	1	0	0	0	0	0	0	0	0	0	0	0	0	3	0	1	3	0	0	0	2	1	11	0	0	0	0	0	0	0	0	0	0	0	0	0	0	0	0	0	0	0	0	0	0	0	0	0	0	0	NA	NA	0.2	0	0.00036101083032491	0	1.4	0.6	0	0	0	0	-Inf	FALSE	FALSE
"1"	102142602	102142947	"-"	"ENSRNOG00000021130_025i"	"ENSRNOG00000021130"	"Abcc8"	345	0	3	0	6	1	0	0	0	0	0	0	0	2	15	10	7	18	2	0	0	8	9	18	0	0	3	0	0	0	0	0	0	0	0	0	0	0	0	0	0	0	0	0	0	0	0	0	0	0	0	NA	NA	2	0	0.00579710144927536	0	10.4	3.8	0.6	0	0	0	-Inf	FALSE	FALSE
"1"	102143065	102143207	"-"	"ENSRNOG00000021130_026i"	"ENSRNOG00000021130"	"Abcc8"	142	0	1	0	5	1	0	0	0	0	1	0	0	0	0	0	0	5	0	0	4	0	12	6	0	0	0	0	3	0	0	0	0	0	0	0	0	0	0	0	2	1	0	0	0	0	1	0	0	0	0	NA	NA	1.4	0.2	0.00985915492957746	0.00140845070422535	1	3.2	0.6	0	0.6	0.2	-1.94591014905531	FALSE	FALSE
"1"	102143314	102144311	"-"	"ENSRNOG00000021130_027i"	"ENSRNOG00000021130"	"Abcc8"	997	1	0	3	1	3	0	0	0	0	0	0	0	6	5	6	22	5	0	3	0	8	8	12	0	0	0	0	0	0	0	0	0	0	0	0	0	0	0	0	0	0	0	0	0	0	0	0	0	0	0	NA	NA	1.6	0	0.00160481444332999	0	8.8	3.8	0	0	0	0	-Inf	FALSE	FALSE
"1"	102144458	102145882	"-"	"ENSRNOG00000021130_028i"	"ENSRNOG00000021130"	"Abcc8"	1424	0	0	0	3	3	0	0	0	0	0	0	0	2	5	8	38	64	7	0	0	8	18	9	0	0	0	0	1	0	0	0	0	0	0	0	0	0	0	0	2	2	0	0	0	0	0	0	0	0	0	NA	NA	1.2	0	0.000842696629213483	0	23.4	6.6	0.2	0	0.8	0	-Inf	FALSE	FALSE
"1"	102145924	102156343	"-"	"ENSRNOG00000021130_029i"	"ENSRNOG00000021130"	"Abcc8"	10419	3	12	4	21	46	0	0	1	0	18	16	0	2	3	3	1	0	5	0	0	0	0	11	0	0	0	0	0	0	0	0	0	0	0	0	0	0	0	0	1	0	0	0	0	0	0	0	0	0	0	NA	NA	17.2	3.8	0.00165083021403206	0.000364718303100106	1.8	1	0	0	0.2	0	-1.50990831708707	FALSE	FALSE
"1"	102156507	102157314	"-"	"ENSRNOG00000021130_030i"	"ENSRNOG00000021130"	"Abcc8"	807	1	0	2	4	9	0	0	0	0	0	0	0	0	3	8	0	2	0	0	0	0	0	4	0	0	0	0	0	1	0	0	0	0	0	0	0	0	0	0	0	0	0	0	0	0	0	0	0	0	0	NA	NA	3.2	0	0.00396530359355638	0	2.6	0	0.2	0	0	0	-Inf	FALSE	FALSE
"1"	102157450	102160552	"-"	"ENSRNOG00000021130_031i"	"ENSRNOG00000021130"	"Abcc8"	3102	0	6	0	10	9	0	0	0	0	0	1	0	0	1	1	0	0	0	0	0	0	0	8	0	0	0	0	0	0	0	0	0	0	0	0	0	0	0	0	0	0	0	0	0	0	0	0	0	0	0	NA	NA	5	0	0.00161186331399097	0	0.4	0	0	0	0	0	-Inf	FALSE	FALSE
"1"	102160709	102163339	"-"	"ENSRNOG00000021130_032i"	"ENSRNOG00000021130"	"Abcc8"	2630	1	2	9	9	11	0	0	0	0	0	5	0	0	3	0	6	3	0	0	0	0	0	0	0	0	0	0	1	1	0	0	0	0	0	0	0	0	0	0	0	0	0	0	0	0	0	0	0	0	0	NA	NA	6.4	0	0.00243346007604563	0	2.4	0	0.4	0	0	0	-Inf	FALSE	FALSE
"1"	102163505	102177381	"-"	"ENSRNOG00000021130_033i"	"ENSRNOG00000021130"	"Abcc8"	13876	1	1	0	28	24	0	0	0	0	7	5	1	3	3	2	3	10	4	0	0	0	3	12	4	0	0	0	0	0	0	0	0	0	0	0	0	0	0	0	0	0	0	0	0	0	0	0	0	0	0	NA	NA	10.8	1.4	0.000778322283078697	0.000100893629287979	4.2	1.4	0	0	0	0	-2.04307389750896	FALSE	FALSE
"1"	102177571	102178323	"-"	"ENSRNOG00000021130_034i"	"ENSRNOG00000021130"	"Abcc8"	752	0	0	0	4	2	0	0	0	0	0	0	0	4	5	2	0	5	0	0	0	0	0	9	0	0	0	0	0	0	0	0	0	0	0	0	0	0	0	0	0	0	0	0	0	0	0	0	0	0	0	NA	NA	1.2	0	0.00159574468085106	0	3.2	0	0	0	0	0	-Inf	FALSE	FALSE
"1"	102178567	102181324	"-"	"ENSRNOG00000021130_035i"	"ENSRNOG00000021130"	"Abcc8"	2757	2	16	12	57	54	0	0	2	1	13	3	0	0	0	0	0	0	5	0	0	0	0	7	0	0	1	0	0	0	0	0	0	0	0	0	0	0	0	0	0	1	0	0	0	0	0	0	0	0	0	NA	NA	28.2	3.2	0.0102285092491839	0.00116068190061661	0	1	0.2	0	0.2	0	-2.17617116813839	TRUE	FALSE
"1"	102181492	102184885	"-"	"ENSRNOG00000021130_036i"	"ENSRNOG00000021130"	"Abcc8"	3393	1	7	0	4	12	0	0	1	0	0	0	0	4	2	1	6	8	0	0	0	0	0	2	0	1	0	0	0	1	0	0	0	0	0	0	0	0	0	0	1	0	0	0	0	0	0	0	0	0	0	NA	NA	4.8	0.2	0.00141467727674624	5.89448865310934e-05	4.2	0	0.4	0	0.2	0	-3.17805383034795	FALSE	FALSE
"1"	102185008	102189713	"-"	"ENSRNOG00000021130_037i"	"ENSRNOG00000021130"	"Abcc8"	4705	12	16	20	25	47	0	0	0	4	11	2	0	1	0	0	4	1	0	0	0	0	0	1	0	0	2	0	2	4	0	0	0	0	0	0	0	0	0	0	0	0	0	0	0	0	0	0	0	0	0	NA	NA	24	3	0.0051009564293305	0.000637619553666312	1.2	0	1.6	0	0	0	-2.07944154167984	TRUE	FALSE
"1"	102189856	102191139	"-"	"ENSRNOG00000021130_038i"	"ENSRNOG00000021130"	"Abcc8"	1283	0	0	0	14	8	0	0	0	0	5	0	0	1	8	1	0	0	6	0	0	0	0	8	1	0	0	0	0	0	0	0	0	0	0	0	0	0	0	0	0	2	0	0	0	0	0	0	0	0	0	NA	NA	4.4	1	0.0034294621979735	0.000779423226812159	2	1.2	0	0	0.4	0	-1.48160454092422	FALSE	FALSE
"1"	102207490	102208964	"-"	"ENSRNOG00000021149_001i"	"ENSRNOG00000021149"	"Ush1c"	1474	0	0	0	0	0	0	0	0	0	4	0	0	0	0	0	0	0	0	0	0	0	0	0	0	0	0	0	0	0	0	0	0	0	0	0	0	0	0	0	0	0	0	0	0	0	0	0	0	0	0	NA	NA	0	0.8	0	0.000542740841248304	0	0	0	0	0	0	Inf	FALSE	FALSE
"1"	102209021	102210119	"-"	"ENSRNOG00000021149_002i"	"ENSRNOG00000021149"	"Ush1c"	1098	0	0	0	0	0	0	0	3	0	0	0	0	0	0	0	0	0	0	0	0	0	0	0	0	0	0	0	0	0	0	0	1	0	0	0	0	0	0	0	0	0	0	0	0	0	0	0	0	0	0	NA	NA	0	0.6	0	0.000546448087431694	0	0	0	0.2	0	0	Inf	FALSE	FALSE
"1"	102210230	102212770	"-"	"ENSRNOG00000021149_003i"	"ENSRNOG00000021149"	"Ush1c"	2540	0	0	0	0	0	0	0	0	0	0	0	0	0	0	0	0	0	0	0	0	0	0	0	0	0	0	0	0	0	0	0	0	0	0	0	0	0	0	0	0	0	0	0	0	0	0	0	0	0	0	NA	NA	0	0	0	0	0	0	0	0	0	0	NA	FALSE	FALSE
"1"	102212871	102213184	"-"	"ENSRNOG00000021149_004i"	"ENSRNOG00000021149"	"Ush1c"	313	0	0	0	0	0	0	0	0	0	0	0	0	0	0	0	0	0	0	0	0	0	0	0	0	0	0	0	0	0	0	0	0	0	0	0	0	0	0	0	0	0	0	0	0	0	0	0	0	0	0	NA	NA	0	0	0	0	0	0	0	0	0	0	NA	FALSE	FALSE
"1"	102213239	102213844	"-"	"ENSRNOG00000021149_005i"	"ENSRNOG00000021149"	"Ush1c"	605	0	0	0	0	0	0	0	0	0	0	0	0	0	0	0	0	0	0	0	0	0	0	0	0	0	0	0	0	0	0	0	0	0	0	0	0	0	0	0	0	0	0	0	0	0	0	0	0	0	0	NA	NA	0	0	0	0	0	0	0	0	0	0	NA	FALSE	FALSE
"1"	102213887	102227980	"-"	"ENSRNOG00000021149_006i"	"ENSRNOG00000021149"	"Ush1c"	14093	1	0	0	0	0	0	0	0	0	6	0	0	0	0	0	0	0	0	0	0	0	0	0	0	0	0	0	0	0	0	0	0	0	0	0	0	0	0	0	0	0	0	0	0	0	0	0	0	0	0	NA	NA	0.2	1.2	1.41914425601362e-05	8.51486553608174e-05	0	0	0	0	0	0	1.79175946922805	FALSE	FALSE
"1"	102228043	102231393	"-"	"ENSRNOG00000021149_007i"	"ENSRNOG00000021149"	"Ush1c"	3350	0	0	0	0	0	0	0	0	0	0	0	0	0	0	0	0	0	0	0	0	0	0	0	0	0	0	0	0	0	0	0	0	0	0	0	0	0	0	0	0	0	0	0	0	0	0	0	0	0	0	NA	NA	0	0	0	0	0	0	0	0	0	0	NA	FALSE	FALSE
"1"	102231519	102232839	"-"	"ENSRNOG00000021149_008i"	"ENSRNOG00000021149"	"Ush1c"	1320	0	0	0	0	0	0	0	7	0	0	0	0	0	0	0	0	0	0	0	0	0	0	0	0	0	0	0	0	0	0	0	0	0	0	0	0	0	0	0	0	0	0	0	0	0	0	0	0	0	0	NA	NA	0	1.4	0	0.00106060606060606	0	0	0	0	0	0	Inf	FALSE	FALSE
"1"	102232906	102233773	"-"	"ENSRNOG00000021149_009i"	"ENSRNOG00000021149"	"Ush1c"	867	0	0	0	0	0	0	0	3	0	0	0	0	0	0	0	0	0	0	0	0	0	0	0	0	0	0	0	0	0	0	0	0	0	0	0	0	0	0	0	0	0	0	0	0	0	0	0	0	0	0	NA	NA	0	0.6	0	0.000692041522491349	0	0	0	0	0	0	Inf	FALSE	FALSE
"1"	102233917	102234021	"-"	"ENSRNOG00000021149_010i"	"ENSRNOG00000021149"	"Ush1c"	104	0	0	0	0	0	0	0	0	0	0	0	0	0	0	0	0	0	0	0	0	0	0	0	0	0	0	0	0	0	0	0	0	0	0	0	0	0	0	0	0	0	0	0	0	0	0	0	0	0	0	NA	NA	0	0	0	0	0	0	0	0	0	0	NA	FALSE	FALSE
"1"	102234079	102234225	"-"	"ENSRNOG00000021149_011i"	"ENSRNOG00000021149"	"Ush1c"	146	0	0	0	0	0	0	0	0	0	0	0	0	0	0	0	0	0	0	0	0	0	0	0	0	0	0	0	0	0	0	0	0	0	0	0	0	0	0	0	0	0	0	0	0	0	0	0	0	0	0	NA	NA	0	0	0	0	0	0	0	0	0	0	NA	FALSE	FALSE
"1"	102234286	102235187	"-"	"ENSRNOG00000021149_012i"	"ENSRNOG00000021149"	"Ush1c"	901	0	0	0	0	0	0	0	0	0	0	0	0	0	0	0	0	0	0	0	0	0	0	0	0	0	0	0	0	0	0	0	0	0	0	0	0	0	0	0	0	0	0	0	0	0	0	0	0	0	0	NA	NA	0	0	0	0	0	0	0	0	0	0	NA	FALSE	FALSE
"1"	102235273	102237294	"-"	"ENSRNOG00000021149_013i"	"ENSRNOG00000021149"	"Ush1c"	2021	0	0	0	0	0	0	0	0	0	4	0	0	0	0	0	0	0	0	0	0	0	0	0	0	0	0	0	0	0	0	0	0	0	0	0	0	0	0	0	0	0	0	0	0	0	0	0	0	0	0	NA	NA	0	0.8	0	0.000395843641761504	0	0	0	0	0	0	Inf	FALSE	FALSE
"1"	102237390	102237656	"-"	"ENSRNOG00000021149_014i"	"ENSRNOG00000021149"	"Ush1c"	266	0	0	0	0	0	0	0	0	0	0	0	0	0	0	0	0	0	0	0	0	0	0	0	0	0	0	0	0	0	0	0	0	0	0	0	0	0	0	0	0	0	0	0	0	0	0	0	0	0	0	NA	NA	0	0	0	0	0	0	0	0	0	0	NA	FALSE	FALSE
"1"	102237715	102237882	"-"	"ENSRNOG00000021149_015i"	"ENSRNOG00000021149"	"Ush1c"	167	0	0	0	0	0	0	0	0	0	0	0	0	0	0	0	0	0	0	0	0	0	0	0	0	0	0	0	0	0	0	0	0	0	0	0	0	0	0	0	0	0	0	0	0	0	0	0	0	0	0	NA	NA	0	0	0	0	0	0	0	0	0	0	NA	FALSE	FALSE
"1"	102237908	102238015	"-"	"ENSRNOG00000021149_016i"	"ENSRNOG00000021149"	"Ush1c"	107	0	0	0	0	0	0	0	0	0	0	0	0	0	0	0	0	0	0	0	0	0	0	0	0	0	0	0	0	0	0	0	0	0	0	0	0	0	0	0	0	0	0	0	0	0	0	0	0	0	0	NA	NA	0	0	0	0	0	0	0	0	0	0	NA	FALSE	FALSE
"1"	102238125	102241538	"-"	"ENSRNOG00000021149_017i"	"ENSRNOG00000021149"	"Ush1c"	3413	0	0	0	0	0	0	0	0	0	0	0	0	0	0	0	0	0	0	0	0	0	0	0	0	0	0	0	0	0	0	0	0	0	0	0	0	0	0	0	0	0	0	0	0	0	0	0	0	0	0	NA	NA	0	0	0	0	0	0	0	0	0	0	NA	FALSE	FALSE
"1"	102241678	102241782	"-"	"ENSRNOG00000021149_018i"	"ENSRNOG00000021149"	"Ush1c"	104	0	0	0	0	0	0	0	0	0	0	0	0	0	0	0	0	0	0	0	0	0	0	0	0	0	0	0	0	0	0	0	0	0	0	0	0	0	0	0	0	0	0	0	0	0	0	0	0	0	0	NA	NA	0	0	0	0	0	0	0	0	0	0	NA	FALSE	FALSE
"1"	102241927	102242378	"-"	"ENSRNOG00000021149_019i"	"ENSRNOG00000021149"	"Ush1c"	451	0	0	0	0	0	0	0	0	0	0	0	0	0	0	0	0	0	0	0	0	0	0	0	0	0	0	0	0	0	0	0	0	0	0	0	0	0	0	0	0	0	0	0	0	0	0	0	0	0	0	NA	NA	0	0	0	0	0	0	0	0	0	0	NA	FALSE	FALSE
"1"	102242447	102255305	"-"	"ENSRNOG00000021149_020i"	"ENSRNOG00000021149"	"Ush1c"	12858	0	0	0	0	1	0	0	0	0	8	0	0	0	0	0	0	0	0	0	0	0	0	0	0	0	0	0	0	0	0	0	0	0	0	0	0	0	0	0	0	0	0	0	0	0	0	0	0	0	0	NA	NA	0.2	1.6	1.55545185876497e-05	0.000124436148701198	0	0	0	0	0	0	2.07944154167984	FALSE	FALSE
"1"	102258272	102258673	"+"	"ENSRNOG00000010983_001i"	"ENSRNOG00000010983"	"Otog"	401	0	0	0	0	0	0	0	0	0	0	0	0	0	0	0	0	0	0	0	0	0	0	0	0	0	0	0	0	0	0	0	0	0	0	0	0	0	0	0	0	0	0	0	0	0	0	0	0	0	0	NA	NA	0	0	0	0	0	0	0	0	0	0	NA	FALSE	FALSE
"1"	102258735	102258857	"+"	"ENSRNOG00000010983_002i"	"ENSRNOG00000010983"	"Otog"	122	0	0	0	0	0	0	0	0	0	0	0	0	0	0	0	0	0	0	0	0	0	0	0	0	0	0	0	0	0	0	0	0	0	0	0	0	0	0	0	0	0	0	0	0	0	0	0	0	0	0	NA	NA	0	0	0	0	0	0	0	0	0	0	NA	FALSE	FALSE
"1"	102258916	102262645	"+"	"ENSRNOG00000010983_003i"	"ENSRNOG00000010983"	"Otog"	3729	0	0	0	0	0	0	0	0	0	0	0	0	0	0	0	0	0	0	0	0	0	0	0	0	0	0	0	0	0	0	0	0	0	0	0	0	0	0	0	0	0	0	0	0	0	0	0	0	0	0	NA	NA	0	0	0	0	0	0	0	0	0	0	NA	FALSE	FALSE
"1"	102262722	102263555	"+"	"ENSRNOG00000010983_004i"	"ENSRNOG00000010983"	"Otog"	833	0	0	0	0	0	0	0	0	0	0	0	0	0	0	0	0	0	0	0	0	0	0	0	0	0	0	0	0	0	0	0	0	0	0	0	0	0	0	0	0	0	0	0	0	0	0	0	0	0	0	NA	NA	0	0	0	0	0	0	0	0	0	0	NA	FALSE	FALSE
"1"	102263649	102263796	"+"	"ENSRNOG00000010983_005i"	"ENSRNOG00000010983"	"Otog"	147	0	0	0	0	0	0	0	0	0	0	0	0	0	0	0	0	0	0	0	0	0	0	0	0	0	0	0	0	0	0	0	0	0	0	0	0	0	0	0	0	0	0	0	0	0	0	0	0	0	0	NA	NA	0	0	0	0	0	0	0	0	0	0	NA	FALSE	FALSE
"1"	102263952	102266296	"+"	"ENSRNOG00000010983_006i"	"ENSRNOG00000010983"	"Otog"	2344	0	0	0	0	0	0	0	0	0	0	0	0	0	0	0	0	0	0	0	0	0	0	0	0	0	0	0	0	0	0	0	0	0	0	0	0	0	0	0	0	0	0	0	0	0	0	0	0	0	0	NA	NA	0	0	0	0	0	0	0	0	0	0	NA	FALSE	FALSE
"1"	102266416	102267198	"+"	"ENSRNOG00000010983_007i"	"ENSRNOG00000010983"	"Otog"	782	0	0	0	0	0	0	0	0	0	0	0	0	0	0	0	0	0	0	0	0	0	0	0	0	0	0	0	0	0	0	0	0	0	0	0	0	0	0	0	0	0	0	0	0	0	0	0	0	0	0	NA	NA	0	0	0	0	0	0	0	0	0	0	NA	FALSE	FALSE
"1"	102267405	102268152	"+"	"ENSRNOG00000010983_008i"	"ENSRNOG00000010983"	"Otog"	747	0	0	0	0	0	0	0	0	0	0	0	0	0	0	0	0	0	0	0	0	0	0	0	0	0	0	0	0	0	0	0	0	0	0	0	0	0	0	0	0	0	0	0	0	0	0	0	0	0	0	NA	NA	0	0	0	0	0	0	0	0	0	0	NA	FALSE	FALSE
"1"	102268284	102268475	"+"	"ENSRNOG00000010983_009i"	"ENSRNOG00000010983"	"Otog"	191	0	0	0	0	0	0	0	0	0	0	0	0	0	0	0	0	0	0	0	0	0	0	0	0	0	0	0	0	0	0	0	0	0	0	0	0	0	0	0	0	0	0	0	0	0	0	0	0	0	0	NA	NA	0	0	0	0	0	0	0	0	0	0	NA	FALSE	FALSE
"1"	102268583	102269172	"+"	"ENSRNOG00000010983_010i"	"ENSRNOG00000010983"	"Otog"	589	0	0	0	0	0	0	0	0	0	0	0	0	0	0	0	0	0	0	0	0	0	0	0	0	0	0	0	0	0	0	0	0	0	0	0	0	0	0	0	0	0	0	0	0	0	0	0	0	0	0	NA	NA	0	0	0	0	0	0	0	0	0	0	NA	FALSE	FALSE
"1"	102269283	102269662	"+"	"ENSRNOG00000010983_011i"	"ENSRNOG00000010983"	"Otog"	379	0	0	0	0	0	0	0	0	0	0	0	0	0	0	0	0	0	0	0	0	0	0	0	0	0	0	0	0	0	0	0	0	0	0	0	0	0	0	0	0	0	0	0	0	0	0	0	0	0	0	NA	NA	0	0	0	0	0	0	0	0	0	0	NA	FALSE	FALSE
"1"	102269792	102270750	"+"	"ENSRNOG00000010983_012i"	"ENSRNOG00000010983"	"Otog"	958	0	0	0	0	0	0	0	0	0	0	0	0	0	0	0	0	0	0	0	0	0	0	0	0	0	0	0	0	0	0	0	0	0	0	0	0	0	0	0	0	0	0	0	0	0	0	0	0	0	0	NA	NA	0	0	0	0	0	0	0	0	0	0	NA	FALSE	FALSE
"1"	102270860	102271125	"+"	"ENSRNOG00000010983_013i"	"ENSRNOG00000010983"	"Otog"	265	0	0	0	0	0	0	0	0	0	0	0	0	0	0	0	0	0	0	0	0	0	0	0	0	0	0	0	0	0	0	0	0	0	0	0	0	0	0	0	0	0	0	0	0	0	0	0	0	0	0	NA	NA	0	0	0	0	0	0	0	0	0	0	NA	FALSE	FALSE
"1"	102271173	102271626	"+"	"ENSRNOG00000010983_014i"	"ENSRNOG00000010983"	"Otog"	453	0	0	0	0	0	0	0	0	0	1	0	0	0	0	0	0	0	0	0	0	0	0	0	0	0	0	0	0	0	0	0	0	0	0	0	0	0	0	0	0	0	0	0	0	0	1	0	0	0	0	NA	NA	0	0.2	0	0.000441501103752759	0	0	0	0	0	0.2	Inf	FALSE	FALSE
"1"	102271773	102275993	"+"	"ENSRNOG00000010983_015i"	"ENSRNOG00000010983"	"Otog"	4220	0	0	0	0	0	0	0	0	0	4	0	0	0	0	0	0	0	0	0	0	0	0	0	0	0	0	0	0	0	0	0	0	0	0	0	0	0	0	0	0	0	0	0	0	0	0	0	0	0	0	NA	NA	0	0.8	0	0.00018957345971564	0	0	0	0	0	0	Inf	FALSE	FALSE
"1"	102276127	102276650	"+"	"ENSRNOG00000010983_016i"	"ENSRNOG00000010983"	"Otog"	523	0	0	0	0	1	0	0	0	0	0	0	0	0	0	0	0	0	0	0	0	0	0	0	0	0	0	0	0	0	0	0	0	0	0	0	0	0	0	0	0	0	0	0	0	0	0	0	0	0	0	NA	NA	0.2	0	0.000382409177820268	0	0	0	0	0	0	0	-Inf	FALSE	FALSE
"1"	102276829	102278819	"+"	"ENSRNOG00000010983_017i"	"ENSRNOG00000010983"	"Otog"	1990	0	0	0	0	0	0	0	0	0	0	5	0	0	0	0	0	0	0	0	0	0	0	0	0	0	0	0	0	0	0	0	0	0	0	0	0	0	0	0	0	0	0	0	0	0	0	0	0	0	0	NA	NA	0	0	0	0	0	0	0	0	0	0	NA	FALSE	FALSE
"1"	102278945	102279887	"+"	"ENSRNOG00000010983_018i"	"ENSRNOG00000010983"	"Otog"	942	0	0	0	0	0	0	0	0	0	0	0	0	0	0	0	0	0	0	0	0	0	0	0	0	0	0	0	0	0	0	0	0	0	0	0	0	0	0	0	0	0	0	0	0	0	0	0	0	0	0	NA	NA	0	0	0	0	0	0	0	0	0	0	NA	FALSE	FALSE
"1"	102280101	102281245	"+"	"ENSRNOG00000010983_019i"	"ENSRNOG00000010983"	"Otog"	1144	0	0	0	0	0	0	0	0	0	0	0	0	0	0	0	0	0	0	0	0	0	0	0	0	0	0	0	0	0	0	0	0	0	0	0	0	0	0	0	0	0	0	0	0	0	0	0	0	0	0	NA	NA	0	0	0	0	0	0	0	0	0	0	NA	FALSE	FALSE
"1"	102281439	102282882	"+"	"ENSRNOG00000010983_020i"	"ENSRNOG00000010983"	"Otog"	1443	0	0	0	0	0	0	0	0	0	0	0	0	0	0	0	0	0	0	0	0	0	0	0	0	0	0	0	0	0	0	0	0	0	0	0	0	0	0	0	0	0	0	0	0	0	0	0	0	0	0	NA	NA	0	0	0	0	0	0	0	0	0	0	NA	FALSE	FALSE
"1"	102282958	102283149	"+"	"ENSRNOG00000010983_021i"	"ENSRNOG00000010983"	"Otog"	191	0	0	0	0	0	0	0	0	0	0	0	0	0	0	0	0	0	0	0	0	0	0	0	0	0	0	0	0	0	0	0	0	0	0	0	0	0	0	0	0	0	0	0	0	0	0	0	0	0	0	NA	NA	0	0	0	0	0	0	0	0	0	0	NA	FALSE	FALSE
"1"	102283194	102284423	"+"	"ENSRNOG00000010983_022i"	"ENSRNOG00000010983"	"Otog"	1229	0	0	0	0	0	0	0	0	0	5	0	0	0	0	0	0	0	0	0	0	0	0	0	0	0	0	0	0	0	0	0	0	0	0	0	0	0	0	0	0	0	0	0	0	0	0	0	0	0	0	NA	NA	0	1	0	0.00081366965012205	0	0	0	0	0	0	Inf	FALSE	FALSE
"1"	102284578	102286380	"+"	"ENSRNOG00000010983_023i"	"ENSRNOG00000010983"	"Otog"	1802	0	0	0	0	0	0	0	0	0	0	0	0	0	0	0	0	0	0	0	0	0	0	0	0	0	0	0	0	0	0	0	0	0	0	0	0	0	0	0	0	0	0	0	0	0	0	0	0	0	0	NA	NA	0	0	0	0	0	0	0	0	0	0	NA	FALSE	FALSE
"1"	102286489	102288497	"+"	"ENSRNOG00000010983_024i"	"ENSRNOG00000010983"	"Otog"	2008	0	0	0	0	0	0	0	0	0	0	0	0	0	0	0	0	0	0	0	0	0	0	0	0	0	0	0	0	0	0	0	0	0	0	0	0	0	0	0	0	0	0	0	0	0	0	0	0	0	0	NA	NA	0	0	0	0	0	0	0	0	0	0	NA	FALSE	FALSE
"1"	102288637	102289183	"+"	"ENSRNOG00000010983_025i"	"ENSRNOG00000010983"	"Otog"	546	0	0	0	0	0	0	0	0	0	0	0	0	0	0	0	0	0	0	0	0	0	0	0	0	0	0	0	0	0	0	0	0	0	0	0	0	0	0	0	0	0	0	0	0	0	0	0	0	0	0	NA	NA	0	0	0	0	0	0	0	0	0	0	NA	FALSE	FALSE
"1"	102289319	102289582	"+"	"ENSRNOG00000010983_026i"	"ENSRNOG00000010983"	"Otog"	263	0	0	0	0	0	0	0	0	0	0	0	0	0	0	0	0	0	0	0	0	0	0	0	0	0	0	0	0	0	0	0	0	0	0	0	0	0	0	0	0	0	0	0	0	0	0	0	0	0	0	NA	NA	0	0	0	0	0	0	0	0	0	0	NA	FALSE	FALSE
"1"	102289730	102289936	"+"	"ENSRNOG00000010983_027i"	"ENSRNOG00000010983"	"Otog"	206	0	0	0	0	0	0	0	0	0	1	0	0	0	0	0	0	0	0	0	0	0	0	0	0	0	0	0	0	0	0	0	0	0	1	0	0	0	0	0	0	0	0	0	0	0	0	0	0	0	0	NA	NA	0	0.2	0	0.000970873786407767	0	0	0	0.2	0	0	Inf	FALSE	FALSE
"1"	102290057	102292042	"+"	"ENSRNOG00000010983_028i"	"ENSRNOG00000010983"	"Otog"	1985	0	0	0	0	0	0	0	0	0	0	0	0	0	0	0	0	0	0	0	0	0	0	0	0	0	0	0	0	0	0	0	0	0	0	0	0	0	0	0	0	0	0	0	0	0	0	0	0	0	0	NA	NA	0	0	0	0	0	0	0	0	0	0	NA	FALSE	FALSE
"1"	102292160	102292768	"+"	"ENSRNOG00000010983_029i"	"ENSRNOG00000010983"	"Otog"	608	0	0	0	0	0	0	0	0	0	0	0	0	0	0	0	0	0	0	0	0	0	0	0	0	0	0	0	0	0	0	0	0	0	0	0	0	0	0	0	0	0	0	0	0	0	0	0	0	0	0	NA	NA	0	0	0	0	0	0	0	0	0	0	NA	FALSE	FALSE
"1"	102292926	102296358	"+"	"ENSRNOG00000010983_030i"	"ENSRNOG00000010983"	"Otog"	3432	0	0	0	0	0	0	0	0	0	1	0	0	0	0	0	0	0	0	0	0	0	0	0	0	0	0	0	0	0	0	0	0	0	0	0	0	0	0	0	0	0	0	0	0	0	0	0	0	0	0	NA	NA	0	0.2	0	5.82750582750583e-05	0	0	0	0	0	0	Inf	FALSE	FALSE
"1"	102296386	102299078	"+"	"ENSRNOG00000010983_031i"	"ENSRNOG00000010983"	"Otog"	2692	0	0	0	0	0	0	0	3	0	2	0	0	0	0	0	0	0	0	0	0	0	0	0	0	0	0	0	0	0	0	0	0	0	0	0	0	0	0	0	0	0	0	0	0	0	0	0	0	0	0	NA	NA	0	1	0	0.00037147102526003	0	0	0	0	0	0	Inf	FALSE	FALSE
"1"	102299247	102300213	"+"	"ENSRNOG00000010983_032i"	"ENSRNOG00000010983"	"Otog"	966	0	0	0	0	0	0	0	1	0	0	0	0	0	0	0	0	0	0	0	0	0	0	0	0	0	0	0	0	0	0	0	0	0	0	0	0	0	0	0	0	0	0	0	0	0	0	0	0	0	0	NA	NA	0	0.2	0	0.00020703933747412	0	0	0	0	0	0	Inf	FALSE	FALSE
"1"	102300493	102301167	"+"	"ENSRNOG00000010983_033i"	"ENSRNOG00000010983"	"Otog"	674	0	0	0	0	1	0	0	0	3	0	0	2	0	0	0	0	0	0	0	0	0	0	0	0	0	0	0	0	0	0	0	0	0	0	0	0	0	0	0	0	0	0	0	0	0	0	0	0	0	0	NA	NA	0.2	0.6	0.00029673590504451	0.000890207715133531	0	0	0	0	0	0	1.09861228866811	FALSE	FALSE
"1"	102301286	102302184	"+"	"ENSRNOG00000010983_034i"	"ENSRNOG00000010983"	"Otog"	898	0	0	0	0	0	0	0	0	0	0	0	0	0	0	0	0	0	0	0	0	0	0	0	0	0	0	0	0	0	0	0	0	0	0	0	0	0	0	0	0	0	0	0	0	0	0	0	0	0	0	NA	NA	0	0	0	0	0	0	0	0	0	0	NA	FALSE	FALSE
"1"	102302265	102302653	"+"	"ENSRNOG00000010983_035i"	"ENSRNOG00000010983"	"Otog"	388	0	0	0	0	0	0	0	0	0	0	0	0	0	0	0	0	0	0	0	0	0	0	0	0	0	0	0	0	0	0	0	0	0	0	0	0	0	0	0	0	0	0	0	0	0	0	0	0	0	0	NA	NA	0	0	0	0	0	0	0	0	0	0	NA	FALSE	FALSE
"1"	102304381	102305444	"+"	"ENSRNOG00000010983_036i"	"ENSRNOG00000010983"	"Otog"	1063	0	0	0	0	0	0	0	0	5	0	0	0	0	0	0	0	0	0	0	0	0	0	0	0	0	0	0	0	0	0	0	0	0	0	0	0	0	0	0	0	0	0	0	0	0	0	0	0	0	0	NA	NA	0	1	0	0.000940733772342427	0	0	0	0	0	0	Inf	FALSE	FALSE
"1"	102305614	102305875	"+"	"ENSRNOG00000010983_037i"	"ENSRNOG00000010983"	"Otog"	261	0	0	0	0	2	0	0	0	0	0	0	0	0	0	0	0	0	0	0	0	0	0	0	0	0	0	0	0	0	0	0	0	0	0	0	0	0	0	0	0	0	0	0	0	0	0	0	0	0	0	NA	NA	0.4	0	0.00153256704980843	0	0	0	0	0	0	0	-Inf	FALSE	FALSE
"1"	102306022	102306903	"+"	"ENSRNOG00000010983_038i"	"ENSRNOG00000010983"	"Otog"	881	0	0	0	0	0	0	0	1	0	7	0	0	0	0	0	0	0	0	0	0	0	0	0	0	0	0	0	0	0	0	0	0	0	0	0	0	0	0	0	0	0	0	0	0	0	0	0	0	0	0	NA	NA	0	1.6	0	0.0018161180476731	0	0	0	0	0	0	Inf	FALSE	FALSE
"1"	102306994	102312002	"+"	"ENSRNOG00000010983_039i"	"ENSRNOG00000010983"	"Otog"	5008	0	0	0	0	1	0	0	0	3	3	1	0	0	0	0	0	0	0	0	0	0	0	1	0	0	0	0	0	0	0	0	0	0	0	0	0	0	0	0	0	0	0	0	0	0	0	0	0	0	0	NA	NA	0.2	1.2	3.99361022364217e-05	0.00023961661341853	0	0	0	0	0	0	1.79175946922805	FALSE	FALSE
"1"	102312187	102314313	"+"	"ENSRNOG00000010983_040i"	"ENSRNOG00000010983"	"Otog"	2126	0	0	0	1	2	0	0	0	0	3	9	0	0	0	0	0	0	0	0	0	0	0	0	0	0	0	0	0	0	0	0	0	0	0	0	0	0	0	0	0	0	0	0	0	0	0	0	0	0	0	NA	NA	0.6	0.6	0.000282220131702728	0.000282220131702728	0	0	0	0	0	0	0	FALSE	FALSE
"1"	102314535	102314668	"+"	"ENSRNOG00000010983_041i"	"ENSRNOG00000010983"	"Otog"	133	0	0	0	0	0	0	0	0	0	0	1	0	0	0	0	0	0	0	0	0	0	0	0	0	0	0	0	0	0	0	0	0	0	0	0	0	0	0	0	0	0	0	0	0	0	0	0	0	0	0	NA	NA	0	0	0	0	0	0	0	0	0	0	NA	FALSE	FALSE
"1"	102314808	102316261	"+"	"ENSRNOG00000010983_042i"	"ENSRNOG00000010983"	"Otog"	1453	0	0	0	0	0	0	0	0	0	0	0	0	0	0	0	0	0	0	0	0	0	0	0	0	0	0	0	0	0	0	0	0	0	0	0	0	0	0	0	0	0	0	0	0	0	0	0	0	0	0	NA	NA	0	0	0	0	0	0	0	0	0	0	NA	FALSE	FALSE
"1"	102316457	102316655	"+"	"ENSRNOG00000010983_043i"	"ENSRNOG00000010983"	"Otog"	198	0	0	0	0	1	0	0	0	0	0	0	0	0	0	0	0	0	0	0	0	0	0	0	0	0	0	0	0	0	0	0	0	0	0	0	0	0	0	0	0	0	0	0	0	0	0	0	0	0	0	NA	NA	0.2	0	0.00101010101010101	0	0	0	0	0	0	0	-Inf	FALSE	FALSE
"1"	102316869	102317375	"+"	"ENSRNOG00000010983_044i"	"ENSRNOG00000010983"	"Otog"	506	0	0	0	0	0	0	0	0	0	0	0	0	0	0	0	0	0	0	0	0	0	0	0	0	0	0	0	0	0	0	0	0	0	0	0	0	0	0	0	0	0	0	0	0	0	0	0	0	0	0	NA	NA	0	0	0	0	0	0	0	0	0	0	NA	FALSE	FALSE
"1"	102317481	102317636	"+"	"ENSRNOG00000010983_045i"	"ENSRNOG00000010983"	"Otog"	155	0	0	0	0	0	0	0	0	0	0	0	0	0	0	0	0	0	0	0	0	0	0	6	0	0	0	0	0	0	0	0	0	0	0	0	0	0	0	0	0	0	0	0	0	0	0	0	0	0	0	NA	NA	0	0	0	0	0	0	0	0	0	0	NA	FALSE	FALSE
"1"	102317745	102318900	"+"	"ENSRNOG00000010983_046i"	"ENSRNOG00000010983"	"Otog"	1155	0	0	0	0	0	0	0	0	0	0	0	0	0	0	0	0	0	0	0	0	0	0	2	0	0	0	0	0	0	0	0	0	0	0	0	0	0	0	0	0	0	0	0	0	0	0	0	0	0	0	NA	NA	0	0	0	0	0	0	0	0	0	0	NA	FALSE	FALSE
"1"	102319003	102319191	"+"	"ENSRNOG00000010983_047i"	"ENSRNOG00000010983"	"Otog"	188	0	0	0	0	0	0	0	0	0	0	0	0	0	0	0	0	0	0	0	0	0	0	0	0	0	0	0	0	0	0	0	0	0	0	0	0	0	0	0	0	0	0	0	0	0	0	0	0	0	0	NA	NA	0	0	0	0	0	0	0	0	0	0	NA	FALSE	FALSE
"1"	102319291	102320210	"+"	"ENSRNOG00000010983_048i"	"ENSRNOG00000010983"	"Otog"	919	0	2	0	0	0	0	0	0	0	0	0	0	0	0	0	0	0	0	0	0	0	0	0	0	0	0	0	0	0	0	0	0	0	0	0	0	0	0	0	0	0	0	0	0	0	0	0	0	0	0	NA	NA	0.4	0	0.00043525571273123	0	0	0	0	0	0	0	-Inf	FALSE	FALSE
"1"	102320252	102321204	"+"	"ENSRNOG00000010983_049i"	"ENSRNOG00000010983"	"Otog"	952	0	0	0	0	0	0	0	0	0	0	0	0	0	0	0	0	0	0	0	0	0	0	0	0	0	0	0	0	0	0	0	0	0	0	0	0	0	0	0	0	0	0	0	0	0	0	0	0	0	0	NA	NA	0	0	0	0	0	0	0	0	0	0	NA	FALSE	FALSE
"1"	102321281	102321384	"+"	"ENSRNOG00000010983_050i"	"ENSRNOG00000010983"	"Otog"	103	0	0	0	0	0	0	0	0	0	0	0	0	0	0	0	0	0	0	0	0	0	0	0	0	0	0	0	0	0	0	0	0	0	0	0	0	0	0	0	0	0	0	0	0	0	0	0	0	0	0	NA	NA	0	0	0	0	0	0	0	0	0	0	NA	FALSE	FALSE
"1"	102321564	102322116	"+"	"ENSRNOG00000010983_051i"	"ENSRNOG00000010983"	"Otog"	552	0	0	0	0	0	0	0	0	0	0	0	0	0	0	0	0	0	0	0	0	0	0	0	0	0	0	0	0	0	0	0	0	0	0	0	0	0	0	0	0	0	0	0	0	0	0	0	0	0	0	NA	NA	0	0	0	0	0	0	0	0	0	0	NA	FALSE	FALSE
"1"	102322222	102322411	"+"	"ENSRNOG00000010983_052i"	"ENSRNOG00000010983"	"Otog"	189	0	0	0	0	0	0	0	0	0	0	0	0	0	0	0	0	0	0	0	0	0	0	0	0	0	0	0	0	0	0	0	0	0	0	0	0	0	0	0	0	0	0	0	0	0	0	0	0	0	0	NA	NA	0	0	0	0	0	0	0	0	0	0	NA	FALSE	FALSE
"1"	102322532	102323292	"+"	"ENSRNOG00000010983_053i"	"ENSRNOG00000010983"	"Otog"	760	0	0	0	0	0	0	0	0	0	0	0	0	0	0	0	0	0	0	0	0	0	0	0	0	0	0	0	0	0	0	0	0	0	0	0	0	0	0	0	0	0	0	0	0	0	0	0	0	0	0	NA	NA	0	0	0	0	0	0	0	0	0	0	NA	FALSE	FALSE
"1"	102323339	102325497	"+"	"ENSRNOG00000010983_054i"	"ENSRNOG00000010983"	"Otog"	2158	0	0	0	1	1	0	0	0	0	0	0	0	0	0	0	0	0	0	0	0	0	0	0	0	0	0	0	0	0	0	0	0	0	0	0	0	0	0	0	0	0	0	0	0	0	0	0	0	0	0	NA	NA	0.4	0	0.000185356811862836	0	0	0	0	0	0	0	-Inf	FALSE	FALSE
"1"	102325578	102325714	"+"	"ENSRNOG00000010983_055i"	"ENSRNOG00000010983"	"Otog"	136	0	0	0	0	0	0	0	0	0	0	0	0	0	0	0	0	0	0	0	0	0	0	0	0	0	0	0	0	0	0	0	0	0	0	0	0	0	0	0	0	0	0	0	0	0	0	0	0	0	0	NA	NA	0	0	0	0	0	0	0	0	0	0	NA	FALSE	FALSE
"1"	102397375	102397827	"+"	"ENSRNOG00000011306_001i"	"ENSRNOG00000011306"	"Myod1"	452	0	0	0	0	0	0	0	0	0	0	0	0	0	0	0	0	0	0	0	0	0	0	0	0	0	0	0	0	0	0	0	0	0	0	0	0	0	0	0	0	0	0	0	0	0	0	0	0	0	0	NA	NA	0	0	0	0	0	0	0	0	0	0	NA	FALSE	FALSE
"1"	102397907	102398216	"+"	"ENSRNOG00000011306_002i"	"ENSRNOG00000011306"	"Myod1"	309	0	0	0	0	0	0	0	0	0	0	0	0	0	0	0	0	0	0	0	0	0	0	0	0	0	0	0	0	0	0	0	0	0	0	0	0	0	0	0	0	0	0	0	0	0	0	0	0	0	0	NA	NA	0	0	0	0	0	0	0	0	0	0	NA	FALSE	FALSE
"1"	102416355	102445083	"+"	"ENSRNOG00000055401_001i"	"ENSRNOG00000055401"	"Kcnc1"	28728	215	219	191	781	955	7	12	5	47	69	830	3	5	7	7	2	4	0	3	0	0	0	39	0	4	1	0	13	17	0	0	0	0	5	7	1	0	0	2	1	4	0	0	0	0	3	0	0	0	0	14	2	472.2	28	0.016436925647452	0.000974658869395711	5	0.6	7	1	1.4	0.6	-2.82519811447621	TRUE	FALSE
"1"	102446018	102453171	"+"	"ENSRNOG00000055401_002i"	"ENSRNOG00000055401"	"Kcnc1"	7153	201	270	206	968	971	94	160	84	490	530	7322	11	0	0	2	1	2	0	0	0	0	2	12	1	8	10	20	16	14	17	2	1	10	9	33	4	2	1	2	3	4	0	0	0	0	6	24	0	0	0	14	NA	523.2	271.6	0.0731441353278345	0.0379700824828743	1	0.4	13.6	7.8	2.4	1.2	-0.655633404458448	TRUE	TRUE
"1"	102453361	102455291	"+"	"ENSRNOG00000055401_003i"	"ENSRNOG00000055401"	"Kcnc1"	1930	6	10	4	27	19	0	18	0	9	6	1003	1	0	0	0	0	0	0	0	0	0	0	1	1	0	0	0	0	2	0	0	0	0	0	17	0	0	0	0	1	0	0	0	0	0	0	23	0	0	0	NA	NA	13.2	6.6	0.00683937823834197	0.00341968911917098	0	0	0.4	0	0.2	0	-0.693147180559945	TRUE	FALSE
"1"	102461701	102527974	"-"	"ENSRNOG00000011488_001i"	"ENSRNOG00000011488"	"Sergef"	66273	204	293	247	893	881	13	12	9	37	62	111	0	4	14	5	2	2	0	0	4	0	0	0	0	0	0	0	0	0	0	0	0	0	0	0	0	0	0	0	0	0	0	0	0	0	0	0	0	0	0	14	NA	503.6	26.6	0.00759887133523456	0.000401370090383716	5.4	0.8	0	0	0	0	-2.94087108638254	TRUE	FALSE
"1"	102528012	102613967	"-"	"ENSRNOG00000011488_002i"	"ENSRNOG00000011488"	"Sergef"	85955	171	274	226	700	793	8	9	6	17	91	68	0	3	22	12	2	6	0	6	11	0	0	0	0	0	4	0	0	0	0	0	0	0	0	0	0	0	0	0	0	0	0	0	0	0	0	0	0	0	0	14	NA	432.8	26.2	0.00503519283345937	0.000304810656738991	9	3.4	0.8	0	0	0	-2.80451631676522	TRUE	FALSE
"1"	102614135	102638884	"-"	"ENSRNOG00000011488_003i"	"ENSRNOG00000011488"	"Sergef"	24749	52	53	55	146	150	0	4	2	4	2	45	3	10	14	9	8	4	19	20	10	9	8	0	0	0	0	0	0	0	0	0	0	0	0	0	0	0	0	0	0	0	0	0	0	0	0	0	0	0	0	29	NA	91.2	2.4	0.00368499737363126	9.69736150955594e-05	9	13.2	0	0	0	0	-3.63758615972639	FALSE	FALSE
"1"	102639044	102643131	"-"	"ENSRNOG00000011488_004i"	"ENSRNOG00000011488"	"Sergef"	4087	13	10	9	97	84	0	0	0	0	1	51	0	19	34	18	28	28	59	25	22	104	66	0	1	0	0	0	1	0	0	0	0	0	0	0	0	0	2	1	0	0	0	0	0	0	0	1	0	0	0	NA	NA	42.6	0.2	0.0104232933692195	4.89356496207487e-05	25.4	55.2	0.2	0	0.6	0	-5.36129216570943	TRUE	FALSE
"1"	102643195	102645519	"-"	"ENSRNOG00000011488_005i"	"ENSRNOG00000011488"	"Sergef"	2324	8	16	8	54	32	25	12	4	1	1	33	0	13	28	9	8	4	38	21	16	8	5	0	0	0	0	0	16	4	0	0	0	0	1	0	0	0	0	0	0	0	0	0	0	0	0	10	0	0	0	NA	NA	23.6	8.6	0.0101549053356282	0.00370051635111876	12.4	17.6	4	0.2	0	0	-1.0094845087721	TRUE	FALSE
"1"	102645634	102650352	"-"	"ENSRNOG00000011488_006i"	"ENSRNOG00000011488"	"Sergef"	4718	14	20	20	56	47	0	0	0	5	9	8	0	9	12	13	11	19	23	17	24	29	36	13	1	0	0	0	0	0	0	0	0	0	0	0	0	0	0	0	3	0	0	0	0	0	0	0	0	0	0	NA	NA	31.4	2.8	0.00665536244171259	0.000593471810089021	12.8	25.8	0	0	0.6	0	-2.41718847573305	TRUE	FALSE
"1"	102650414	102656456	"-"	"ENSRNOG00000011488_007i"	"ENSRNOG00000011488"	"Sergef"	6042	22	32	22	63	74	0	0	0	7	10	29	0	4	3	2	10	9	20	5	5	52	33	13	0	0	0	2	0	1	0	0	0	0	0	0	0	0	0	0	0	0	0	0	0	0	0	0	0	0	0	NA	NA	42.6	3.4	0.0070506454816286	0.000562727573651109	5.6	23	0.6	0	0	0	-2.52807882165321	TRUE	FALSE
"1"	102656552	102658894	"-"	"ENSRNOG00000011488_008i"	"ENSRNOG00000011488"	"Sergef"	2342	8	13	4	15	21	0	0	0	1	0	13	0	15	15	11	5	13	12	18	4	18	22	15	2	0	0	0	0	0	0	0	0	0	0	0	0	4	0	0	0	0	0	0	0	0	0	0	0	0	0	NA	NA	12.2	0.2	0.00520922288642186	8.5397096498719e-05	11.8	14.8	0	0	0.8	0	-4.11087386417331	TRUE	FALSE
"1"	102659051	102660561	"-"	"ENSRNOG00000011488_009i"	"ENSRNOG00000011488"	"Sergef"	1510	26	21	17	26	29	3	0	2	0	6	11	7	10	16	6	12	1	35	18	34	6	12	0	0	2	0	0	1	2	0	0	0	0	0	0	0	0	1	1	0	2	0	0	0	0	0	3	0	0	0	NA	NA	23.8	2.2	0.0157615894039735	0.00145695364238411	9	21	1	0	0.8	0	-2.38122822031316	TRUE	FALSE
"1"	102660698	102664867	"-"	"ENSRNOG00000011488_010i"	"ENSRNOG00000011488"	"Sergef"	4169	59	85	75	104	121	7	3	3	0	6	241	31	2	11	3	0	0	3	4	15	0	0	0	1	0	0	0	0	0	0	0	0	0	0	0	0	0	4	0	0	0	0	0	0	0	0	0	0	0	0	NA	NA	88.8	3.8	0.0213000719597026	0.000911489565843128	3.2	4.4	0	0	0.8	0	-3.15138558326578	TRUE	FALSE
"1"	102672485	102673494	"-"	"ENSRNOG00000011672_001i"	"ENSRNOG00000011672"	"Tph1"	1009	0	0	0	0	0	0	0	0	0	0	0	0	0	0	0	0	0	0	0	0	0	0	0	0	0	0	0	0	0	0	0	0	0	0	0	0	0	0	0	0	0	0	0	0	0	0	0	0	0	0	NA	NA	0	0	0	0	0	0	0	0	0	0	NA	FALSE	FALSE
"1"	102673629	102674676	"-"	"ENSRNOG00000011672_002i"	"ENSRNOG00000011672"	"Tph1"	1047	0	0	0	0	0	0	0	0	0	0	0	0	0	0	0	0	0	0	0	0	0	0	0	0	0	0	0	0	0	0	0	0	0	0	0	0	0	0	0	0	0	0	0	0	0	0	0	0	0	0	NA	NA	0	0	0	0	0	0	0	0	0	0	NA	FALSE	FALSE
"1"	102674773	102676369	"-"	"ENSRNOG00000011672_003i"	"ENSRNOG00000011672"	"Tph1"	1596	0	0	0	0	0	0	0	0	0	0	0	0	0	0	0	0	0	0	0	0	0	0	0	0	0	0	0	0	0	0	0	0	0	0	0	0	0	0	0	0	0	0	0	0	0	0	0	0	0	0	NA	NA	0	0	0	0	0	0	0	0	0	0	NA	FALSE	FALSE
"1"	102676497	102677163	"-"	"ENSRNOG00000011672_004i"	"ENSRNOG00000011672"	"Tph1"	666	0	0	0	0	0	0	0	0	0	0	0	0	0	0	0	0	0	0	0	0	0	0	0	0	0	0	0	0	0	0	0	0	0	0	0	0	0	0	0	0	0	0	0	0	0	0	0	0	0	0	NA	NA	0	0	0	0	0	0	0	0	0	0	NA	FALSE	FALSE
"1"	102677300	102689094	"-"	"ENSRNOG00000011672_005i"	"ENSRNOG00000011672"	"Tph1"	11794	0	0	0	0	0	0	0	0	0	1	0	0	0	0	0	0	0	0	0	0	0	0	0	0	0	0	0	0	0	0	0	0	0	0	0	0	0	0	0	0	0	0	0	0	0	0	0	0	0	0	NA	NA	0	0.2	0	1.69577751399016e-05	0	0	0	0	0	0	Inf	FALSE	FALSE
"1"	102689292	102689440	"-"	"ENSRNOG00000011672_006i"	"ENSRNOG00000011672"	"Tph1"	148	0	0	0	0	0	0	0	0	0	0	0	0	0	0	0	0	0	0	0	0	0	0	0	0	0	0	0	0	0	0	0	0	0	0	0	0	0	0	0	0	0	0	0	0	0	0	0	0	0	0	NA	NA	0	0	0	0	0	0	0	0	0	0	NA	FALSE	FALSE
"1"	102689509	102692666	"-"	"ENSRNOG00000011672_007i"	"ENSRNOG00000011672"	"Tph1"	3157	0	0	0	0	0	0	0	0	0	2	0	0	0	0	0	0	0	0	0	0	0	0	0	0	0	0	0	0	0	0	0	0	0	0	0	0	0	0	0	0	0	0	0	0	0	0	0	0	0	0	NA	NA	0	0.4	0	0.000126702565726956	0	0	0	0	0	0	Inf	FALSE	FALSE
"1"	102692768	102694148	"-"	"ENSRNOG00000011672_008i"	"ENSRNOG00000011672"	"Tph1"	1380	0	0	0	0	0	0	0	0	0	0	0	0	0	0	0	0	0	0	0	0	0	0	0	0	0	0	0	0	0	0	0	0	0	0	0	0	0	0	0	0	0	0	0	0	0	0	0	0	0	0	NA	NA	0	0	0	0	0	0	0	0	0	0	NA	FALSE	FALSE
"1"	102694333	102697174	"-"	"ENSRNOG00000011672_009i"	"ENSRNOG00000011672"	"Tph1"	2841	0	0	0	0	0	0	0	2	0	0	0	0	0	0	0	0	0	0	0	0	0	0	0	0	0	0	0	0	0	0	0	0	0	0	0	0	0	0	0	0	0	0	0	2	0	0	0	0	0	0	NA	NA	0	0.4	0	0.000140795494544175	0	0	0	0	0	0.4	Inf	FALSE	FALSE
"1"	102697299	102698149	"-"	"ENSRNOG00000011672_010i"	"ENSRNOG00000011672"	"Tph1"	850	0	0	0	0	0	0	0	0	0	1	0	0	0	0	0	0	0	0	0	0	0	0	0	0	0	0	0	0	0	0	0	0	0	0	0	0	0	0	0	0	0	0	0	0	0	0	0	0	0	0	NA	NA	0	0.2	0	0.000235294117647059	0	0	0	0	0	0	Inf	FALSE	FALSE
"1"	102698198	102699377	"-"	"ENSRNOG00000011672_011i"	"ENSRNOG00000011672"	"Tph1"	1179	0	0	0	0	2	0	0	0	0	0	0	0	0	0	0	0	0	0	0	0	0	0	0	0	0	0	0	0	0	0	0	0	0	0	0	0	0	0	0	0	0	0	0	0	0	0	0	0	0	0	NA	NA	0.4	0	0.000339270568278202	0	0	0	0	0	0	0	-Inf	FALSE	FALSE
"1"	102720279	102720635	"-"	"ENSRNOG00000011895_003i"	"ENSRNOG00000011895"	"LOC691143"	356	0	2	0	0	0	0	0	0	0	0	1	0	2	2	0	2	3	0	0	0	1	1	0	0	0	2	0	0	0	0	0	0	0	0	0	0	0	0	0	0	0	0	0	0	0	0	0	0	0	0	NA	NA	0.4	0	0.00112359550561798	0	1.8	0.4	0.4	0	0	0	-Inf	FALSE	FALSE
"1"	102720729	102722887	"-"	"ENSRNOG00000011895_004i"	"ENSRNOG00000011895"	"LOC691143"	2158	5	2	0	5	6	0	0	0	0	0	15	0	0	0	0	0	1	0	0	0	0	0	0	0	0	0	0	0	0	0	0	0	0	0	0	0	0	0	0	0	0	0	0	0	0	0	6	0	0	0	NA	NA	3.6	0	0.00166821130676552	0	0.2	0	0	0	0	0	-Inf	FALSE	FALSE
"1"	102723085	102726438	"-"	"ENSRNOG00000011895_006i"	"ENSRNOG00000011895"	"LOC691143"	3353	0	2	0	2	0	0	0	0	0	0	1	0	2	6	9	5	3	4	0	0	0	0	0	0	0	2	0	2	0	0	0	0	0	0	0	0	0	0	0	0	0	0	0	0	0	0	0	0	0	0	NA	NA	0.8	0	0.000238592305398151	0	5	0.8	0.8	0	0	0	-Inf	FALSE	FALSE
"1"	102726632	102726719	"-"	"ENSRNOG00000011895_008i"	"ENSRNOG00000011895"	"LOC691143"	87	0	0	0	0	2	0	0	0	0	0	0	0	1	3	1	1	0	0	0	3	0	0	1	0	0	0	0	0	0	0	0	0	0	0	0	0	0	0	0	0	2	0	0	0	0	0	0	0	0	0	NA	NA	0.4	0	0.00459770114942529	0	1.2	0.6	0	0	0.4	0	-Inf	FALSE	FALSE
"1"	102726803	102729282	"-"	"ENSRNOG00000011895_009i"	"ENSRNOG00000011895"	"LOC691143"	2479	3	3	2	1	6	0	0	0	0	0	13	0	0	0	1	4	0	0	0	0	0	0	0	0	0	0	0	0	0	0	0	0	0	0	0	0	0	0	0	0	0	0	0	0	0	0	0	0	0	0	NA	NA	3	0	0.00121016538926987	0	1	0	0	0	0	0	-Inf	FALSE	FALSE
"1"	102729464	102729848	"-"	"ENSRNOG00000011895_010i"	"ENSRNOG00000011895"	"LOC691143"	384	0	0	0	0	1	0	0	0	0	0	0	0	3	3	0	2	0	0	0	0	0	1	0	0	0	0	0	0	0	0	0	0	0	0	0	0	0	0	0	0	0	0	0	0	0	0	0	0	0	0	NA	NA	0.2	0	0.000520833333333333	0	1.6	0.2	0	0	0	0	-Inf	FALSE	FALSE
"1"	102730128	102731411	"-"	"ENSRNOG00000011895_014i"	"ENSRNOG00000011895"	"LOC691143"	1283	2	3	3	3	9	0	0	0	0	0	9	0	11	5	9	2	2	10	0	0	0	0	0	0	0	0	0	0	0	0	0	0	0	0	0	0	0	0	0	1	1	0	0	0	0	0	0	0	0	0	NA	NA	4	0	0.00311769290724864	0	5.8	2	0	0	0.4	0	-Inf	FALSE	FALSE
"1"	102731492	102734369	"-"	"ENSRNOG00000011895_015i"	"ENSRNOG00000011895"	"LOC691143"	2877	7	9	7	9	22	3	0	0	4	1	11	0	0	0	4	2	0	0	0	0	0	0	0	0	0	0	0	0	0	0	0	0	0	0	0	0	0	0	0	0	0	0	0	0	0	0	0	0	0	0	NA	NA	10.8	1.6	0.00375391032325339	0.000556134862704206	1.2	0	0	0	0	0	-1.90954250488444	FALSE	FALSE
"1"	102734454	102736198	"-"	"ENSRNOG00000011895_016i"	"ENSRNOG00000011895"	"LOC691143"	1744	0	2	1	1	3	0	0	0	0	0	2	0	2	0	0	0	0	0	0	2	0	0	6	0	0	0	0	0	0	0	0	0	0	0	0	0	0	0	0	0	0	0	0	0	0	0	0	0	0	0	NA	NA	1.4	0	0.000802752293577982	0	0.4	0.4	0	0	0	0	-Inf	FALSE	FALSE
"1"	102736313	102737369	"-"	"ENSRNOG00000011895_017i"	"ENSRNOG00000011895"	"LOC691143"	1056	2	5	6	6	4	0	0	0	2	0	0	0	0	0	1	0	0	0	7	0	0	0	0	0	0	0	0	0	0	0	0	0	0	0	0	0	0	0	0	0	0	0	0	0	0	0	0	0	0	0	NA	NA	4.6	0.4	0.00435606060606061	0.000378787878787879	0.2	1.4	0	0	0	0	-2.4423470353692	FALSE	FALSE
"1"	102738149	102738449	"-"	"ENSRNOG00000011895_019i"	"ENSRNOG00000011895"	"LOC691143"	300	0	0	0	0	0	0	0	0	0	1	0	0	0	0	0	0	0	0	0	0	0	0	0	0	0	0	0	0	0	0	0	0	0	1	0	0	0	0	0	0	0	0	0	0	0	0	0	0	0	0	NA	NA	0	0.2	0	0.000666666666666667	0	0	0	0.2	0	0	Inf	FALSE	FALSE
"1"	102738532	102738839	"-"	"ENSRNOG00000011895_020i"	"ENSRNOG00000011895"	"LOC691143"	307	0	0	0	0	0	0	1	0	0	0	0	0	0	0	0	0	0	0	0	0	0	0	0	0	0	0	0	0	0	0	1	0	0	0	0	0	0	0	0	0	0	0	0	0	0	0	0	0	0	0	NA	NA	0	0.2	0	0.000651465798045603	0	0	0	0.2	0	0	Inf	FALSE	FALSE
"1"	102738959	102739313	"-"	"ENSRNOG00000011895_021i"	"ENSRNOG00000011895"	"LOC691143"	354	0	0	0	0	0	0	0	0	0	0	0	0	0	0	0	0	0	0	0	1	0	0	0	0	0	0	0	0	0	0	0	0	0	0	0	0	0	0	0	0	0	0	0	0	0	0	0	0	0	0	NA	NA	0	0	0	0	0	0.2	0	0	0	0	NA	FALSE	FALSE
"1"	102739453	102741490	"-"	"ENSRNOG00000011895_022i"	"ENSRNOG00000011895"	"LOC691143"	2037	0	0	0	1	0	0	0	0	0	1	1	0	0	3	0	0	0	0	0	0	0	0	0	0	0	0	0	0	0	0	0	0	0	0	0	0	0	0	0	0	0	0	0	0	0	0	0	0	0	0	NA	NA	0.2	0.2	9.81836033382425e-05	9.81836033382425e-05	0.6	0	0	0	0	0	0	FALSE	FALSE
"1"	102777459	102777786	"-"	"ENSRNOG00000055531_002i"	"ENSRNOG00000055531"	"Hps5"	327	0	0	0	0	0	0	0	0	0	0	0	0	0	0	0	0	0	0	0	0	0	0	0	0	0	0	0	0	0	0	0	0	0	0	0	0	0	0	0	0	0	0	0	0	0	0	0	0	0	0	NA	NA	0	0	0	0	0	0	0	0	0	0	NA	FALSE	FALSE
"1"	102777926	102779479	"-"	"ENSRNOG00000055531_003i"	"ENSRNOG00000055531"	"Hps5"	1553	0	0	0	0	0	0	0	0	0	1	0	0	0	0	0	0	0	0	0	0	0	0	0	0	0	0	0	0	0	0	0	0	0	0	0	0	0	0	0	0	0	0	0	0	0	0	0	0	0	0	NA	NA	0	0.2	0	0.000128783000643915	0	0	0	0	0	0	Inf	FALSE	FALSE
"1"	102779578	102780255	"-"	"ENSRNOG00000055531_004i"	"ENSRNOG00000055531"	"Hps5"	677	0	0	0	0	0	0	0	0	0	0	0	0	0	0	0	0	0	0	0	0	0	0	0	0	0	0	0	0	0	0	0	0	0	0	0	0	0	0	0	0	0	0	0	0	0	0	0	0	0	0	NA	NA	0	0	0	0	0	0	0	0	0	0	NA	FALSE	FALSE
"1"	102780382	102782582	"-"	"ENSRNOG00000055531_005i"	"ENSRNOG00000055531"	"Hps5"	2200	0	0	0	0	0	0	0	0	0	0	0	0	0	0	0	0	0	0	0	0	0	0	0	0	0	0	0	0	0	0	0	0	0	0	0	0	0	0	0	0	0	0	0	0	0	0	0	0	0	0	NA	NA	0	0	0	0	0	0	0	0	0	0	NA	FALSE	FALSE
"1"	102782626	102786662	"-"	"ENSRNOG00000055531_006i"	"ENSRNOG00000055531"	"Hps5"	4036	0	0	0	0	0	0	0	0	0	0	2	0	0	0	0	0	0	0	0	0	0	0	0	0	0	0	0	0	0	0	0	0	0	0	0	0	0	0	0	0	0	0	0	0	0	0	0	0	0	0	NA	NA	0	0	0	0	0	0	0	0	0	0	NA	FALSE	FALSE
"1"	102786822	102787908	"-"	"ENSRNOG00000055531_007i"	"ENSRNOG00000055531"	"Hps5"	1086	0	0	0	0	0	0	0	0	0	0	0	0	0	0	0	0	0	0	0	0	0	0	0	0	0	0	0	0	0	0	0	0	0	0	0	0	0	0	0	0	0	0	0	0	0	0	0	0	0	0	NA	NA	0	0	0	0	0	0	0	0	0	0	NA	FALSE	FALSE
"1"	102787998	102795654	"-"	"ENSRNOG00000055531_008i"	"ENSRNOG00000055531"	"Hps5"	7656	0	0	0	0	0	0	0	0	0	3	1	0	0	0	0	0	0	0	0	0	0	0	0	0	0	0	0	0	0	0	0	0	0	0	0	0	0	0	0	0	0	0	0	0	0	0	0	0	0	0	NA	NA	0	0.6	0	7.83699059561128e-05	0	0	0	0	0	0	Inf	FALSE	FALSE
"1"	102795680	102799293	"-"	"ENSRNOG00000055531_009i"	"ENSRNOG00000055531"	"Hps5"	3613	0	0	0	0	0	0	0	0	0	3	2	0	0	0	0	0	0	0	0	0	0	0	0	0	0	0	0	0	0	0	0	0	0	0	0	0	0	0	0	0	0	0	0	0	0	0	0	0	0	0	NA	NA	0	0.6	0	0.000166066980348741	0	0	0	0	0	0	Inf	FALSE	FALSE
"1"	102799388	102806182	"-"	"ENSRNOG00000055531_010i"	"ENSRNOG00000055531"	"Hps5"	6794	0	0	0	1	6	0	0	0	0	10	8	3	0	0	0	0	0	0	0	0	0	0	0	0	0	0	0	0	0	0	0	0	0	0	0	0	0	0	0	0	0	0	0	0	0	0	0	0	0	0	NA	NA	1.4	2	0.000206064174271416	0.000294377391816309	0	0	0	0	0	0	0.356674943938732	FALSE	FALSE
"1"	102806262	102810104	"-"	"ENSRNOG00000055531_011i"	"ENSRNOG00000055531"	"Hps5"	3842	0	0	0	1	6	0	0	0	0	0	0	0	0	0	0	0	0	0	0	0	0	0	0	0	0	0	0	0	0	0	0	0	0	0	0	0	0	0	0	0	0	0	0	0	0	0	0	0	0	0	NA	NA	1.4	0	0.000364393545028631	0	0	0	0	0	0	0	-Inf	FALSE	FALSE
"1"	102811204	102812606	"-"	"ENSRNOG00000055531_013i"	"ENSRNOG00000055531"	"Hps5"	1402	0	2	5	3	9	0	0	0	0	2	2	0	0	0	1	2	1	0	0	0	0	0	1	0	0	0	0	0	0	0	0	0	0	0	0	0	0	0	0	0	0	0	0	0	0	0	0	0	0	0	NA	NA	3.8	0.4	0.00271041369472183	0.000285306704707561	0.8	0	0	0	0	0	-2.25129179860649	FALSE	FALSE
"1"	102812878	102814520	"-"	"ENSRNOG00000055531_014i"	"ENSRNOG00000055531"	"Hps5"	1642	8	12	2	20	16	0	0	0	1	1	20	0	0	0	2	2	3	0	0	4	0	0	1	0	0	0	0	0	2	0	0	0	0	0	0	0	4	4	0	2	0	0	0	0	0	0	0	0	0	0	NA	NA	11.6	0.4	0.00706455542021924	0.000243605359317905	1.4	0.8	0.4	0	2	0	-3.36729582998647	TRUE	FALSE
"1"	102814628	102817128	"-"	"ENSRNOG00000055531_015i"	"ENSRNOG00000055531"	"Hps5"	2500	4	3	12	27	23	0	0	0	0	0	22	0	0	4	4	0	0	0	0	0	0	0	0	0	0	0	0	0	0	0	0	0	0	0	0	0	0	0	0	0	0	0	0	0	0	0	0	0	0	0	NA	NA	13.8	0	0.00552	0	1.6	0	0	0	0	0	-Inf	TRUE	FALSE
"1"	102817243	102818042	"-"	"ENSRNOG00000055531_016i"	"ENSRNOG00000055531"	"Hps5"	799	6	2	5	5	7	0	0	0	1	0	1	0	1	3	3	1	0	0	0	0	0	0	5	0	0	1	0	4	4	0	0	0	0	0	0	0	0	0	0	0	0	0	0	0	1	0	0	0	0	0	NA	NA	5	0.2	0.00625782227784731	0.000250312891113892	1.6	0	1.8	0	0	0.2	-3.2188758248682	TRUE	FALSE
"1"	102818163	102818936	"-"	"ENSRNOG00000055531_017i"	"ENSRNOG00000055531"	"Hps5"	773	6	9	7	41	65	0	0	0	0	0	7	0	1	9	3	0	0	0	0	0	0	0	1	0	3	6	4	7	9	0	0	0	0	0	0	0	0	1	0	0	0	0	0	0	0	0	0	0	0	0	NA	NA	25.6	0	0.033117723156533	0	2.6	0	5.8	0	0.2	0	-Inf	TRUE	FALSE
"1"	102819093	102819287	"-"	"ENSRNOG00000055531_018i"	"ENSRNOG00000055531"	"Hps5"	194	3	6	2	7	5	0	0	0	0	1	5	0	1	3	4	0	11	3	5	0	3	7	5	0	3	4	0	0	2	0	0	0	0	0	0	0	0	2	2	1	3	0	0	0	0	1	4	0	0	0	NA	NA	4.6	0.2	0.0237113402061856	0.00103092783505155	3.8	3.6	1.8	0	1.6	0.2	-3.13549421592915	TRUE	FALSE
"1"	102819409	102823520	"-"	"ENSRNOG00000055531_019i"	"ENSRNOG00000055531"	"Hps5"	4111	17	18	5	52	29	10	0	0	1	1	20	0	3	1	3	4	4	0	0	0	2	0	0	0	2	3	1	2	3	10	0	0	0	0	0	0	2	0	0	1	0	0	0	0	0	0	0	0	0	0	NA	NA	24.2	2.4	0.00588664558501581	0.000583799562150328	3	0.4	2.2	2	0.6	0	-2.31088389580874	TRUE	FALSE
"1"	102824096	102824382	"-"	"ENSRNOG00000055531_022i"	"ENSRNOG00000055531"	"Hps5"	286	2	4	0	0	3	0	0	0	0	0	0	0	2	9	1	0	1	0	0	0	0	0	0	0	0	0	0	0	0	0	0	0	0	0	0	0	2	2	0	0	0	0	0	0	0	0	0	0	0	0	NA	NA	1.8	0	0.00629370629370629	0	2.6	0	0	0	0.8	0	-Inf	FALSE	FALSE
"1"	102824455	102824969	"-"	"ENSRNOG00000055531_023i"	"ENSRNOG00000055531"	"Hps5"	514	2	0	2	1	2	0	0	0	0	0	0	0	5	15	3	2	0	0	0	0	0	0	0	0	0	0	1	0	0	0	0	0	0	0	0	0	0	0	1	1	0	0	0	0	0	0	0	0	0	0	NA	NA	1.4	0	0.00272373540856031	0	5	0	0.2	0	0.4	0	-Inf	FALSE	FALSE
"1"	102825120	102826861	"-"	"ENSRNOG00000055531_024i"	"ENSRNOG00000055531"	"Hps5"	1741	3	9	1	0	3	0	0	0	0	0	2	0	3	9	4	3	1	0	0	0	0	0	2	1	0	0	0	0	0	0	0	0	0	0	0	0	1	2	0	0	0	0	0	0	0	0	2	0	0	0	NA	NA	3.2	0	0.00183802412406663	0	4	0	0	0	0.6	0	-Inf	FALSE	FALSE
"1"	102826986	102827629	"-"	"ENSRNOG00000055531_026i"	"ENSRNOG00000055531"	"Hps5"	643	1	11	6	14	7	0	0	0	0	0	9	0	0	2	0	1	4	0	0	0	0	1	1	0	0	1	0	0	0	0	0	0	0	0	0	0	0	0	0	7	6	0	0	0	0	0	0	0	0	0	NA	NA	7.8	0	0.0121306376360809	0	1.4	0.2	0.2	0	2.6	0	-Inf	TRUE	FALSE
"1"	102827817	102828968	"-"	"ENSRNOG00000055531_027i"	"ENSRNOG00000055531"	"Hps5"	1151	2	7	0	7	2	0	0	0	0	0	0	0	10	10	2	6	5	0	0	0	0	0	0	0	0	0	0	0	0	0	0	0	0	0	0	0	0	0	0	3	1	0	0	0	0	0	0	0	0	0	NA	NA	3.6	0	0.00312771503040834	0	6.6	0	0	0	0.8	0	-Inf	FALSE	FALSE
"1"	102829128	102829954	"-"	"ENSRNOG00000055531_028i"	"ENSRNOG00000055531"	"Hps5"	826	0	0	0	1	4	0	0	0	0	0	2	0	1	0	1	0	2	0	0	0	0	0	1	4	0	0	0	0	0	0	0	0	0	0	0	0	0	0	0	0	0	0	0	0	0	0	0	0	0	0	NA	NA	1	0	0.00121065375302663	0	0.8	0	0	0	0	0	-Inf	FALSE	FALSE
"1"	102830134	102830842	"-"	"ENSRNOG00000055531_029i"	"ENSRNOG00000055531"	"Hps5"	708	0	1	1	1	2	0	0	0	0	0	0	0	0	0	0	2	1	0	0	0	0	0	0	0	0	0	0	0	0	0	0	0	0	0	0	0	0	0	0	0	0	0	0	0	0	0	0	0	0	0	NA	NA	1	0	0.00141242937853107	0	0.6	0	0	0	0	0	-Inf	FALSE	FALSE
"1"	102830932	102835083	"-"	"ENSRNOG00000055531_030i"	"ENSRNOG00000055531"	"Hps5"	4151	12	9	13	13	28	0	0	0	0	0	2	0	0	0	1	2	5	0	0	0	0	0	0	0	3	2	2	2	3	0	0	0	0	0	0	0	0	0	0	0	0	0	0	0	0	0	0	0	0	0	NA	NA	15	0	0.00361358708744881	0	1.6	0	2.4	0	0	0	-Inf	FALSE	FALSE
"1"	102835156	102835541	"-"	"ENSRNOG00000055531_031i"	"ENSRNOG00000055531"	"Hps5"	385	3	0	0	0	3	0	0	0	0	0	0	0	6	5	7	4	1	0	5	0	0	0	0	1	0	0	0	0	0	0	0	0	0	0	0	0	3	0	0	0	3	0	0	0	0	0	0	0	0	0	NA	NA	1.2	0	0.00311688311688312	0	4.6	1	0	0	1.2	0	-Inf	FALSE	FALSE
"1"	102835755	102838814	"-"	"ENSRNOG00000055531_032i"	"ENSRNOG00000055531"	"Hps5"	3059	3	33	8	32	39	0	0	0	0	0	5	0	1	5	0	1	3	0	0	0	0	0	0	0	0	0	0	0	0	0	0	0	0	0	0	0	0	0	0	0	0	0	0	0	0	0	0	0	0	0	NA	NA	23	0	0.0075187969924812	0	2	0	0	0	0	0	-Inf	TRUE	FALSE
"1"	102838949	102840340	"-"	"ENSRNOG00000055531_033i"	"ENSRNOG00000055531"	"Hps5"	1391	8	3	7	1	14	0	0	0	0	0	4	0	0	0	0	3	2	0	0	0	0	0	2	0	0	0	2	0	1	0	0	0	0	0	0	0	1	0	0	0	3	0	0	0	0	0	0	0	0	0	NA	NA	6.6	0	0.00474478792235802	0	1	0	0.6	0	0.8	0	-Inf	FALSE	FALSE
"1"	102840534	102841115	"-"	"ENSRNOG00000055531_034i"	"ENSRNOG00000055531"	"Hps5"	581	0	6	0	5	7	0	0	0	0	0	0	0	2	5	7	0	1	0	2	0	0	0	5	0	0	0	0	0	0	0	0	0	0	0	0	0	0	0	0	0	2	0	0	0	0	0	0	0	0	0	NA	NA	3.6	0	0.00619621342512909	0	3	0.4	0	0	0.4	0	-Inf	FALSE	FALSE
"1"	102841181	102841266	"-"	"ENSRNOG00000055531_035i"	"ENSRNOG00000055531"	"Hps5"	85	0	0	0	5	2	0	0	0	0	0	0	0	2	1	0	0	0	0	0	0	0	0	1	0	0	0	0	4	1	0	0	0	0	0	0	0	0	0	0	1	1	0	0	0	0	0	0	0	0	0	NA	NA	1.4	0	0.0164705882352941	0	0.6	0	1	0	0.4	0	-Inf	FALSE	FALSE
"1"	102841378	102844915	"-"	"ENSRNOG00000055531_036i"	"ENSRNOG00000055531"	"Hps5"	3537	20	27	12	88	78	0	0	1	1	2	7	0	3	0	3	2	0	0	3	0	0	1	1	0	0	0	0	0	1	0	0	1	0	0	0	0	0	1	0	2	9	0	0	0	0	0	0	0	0	0	NA	NA	45	0.8	0.0127226463104326	0.000226180378852135	1.6	0.8	0.2	0.2	2.4	0	-4.02980604108453	TRUE	FALSE
"1"	102845084	102849247	"-"	"ENSRNOG00000055531_038i"	"ENSRNOG00000055531"	"Hps5"	4163	42	26	23	54	63	0	0	0	0	1	22	0	5	4	0	0	2	0	0	0	0	0	1	0	0	0	1	0	0	0	0	0	0	0	0	0	0	2	0	0	0	0	0	0	0	0	0	0	0	0	NA	NA	41.6	0.2	0.00999279365841941	4.80422772039395e-05	2.2	0	0.2	0	0.4	0	-5.33753807970132	TRUE	FALSE
"1"	102850077	102857249	"+"	"ENSRNOG00000012360_001i"	"ENSRNOG00000012360"	"Gtf2h1"	7172	49	79	42	113	88	0	0	0	3	3	4	0	4	3	3	0	1	3	10	0	0	0	17	0	3	0	0	0	0	0	0	0	0	0	0	0	0	1	1	2	0	0	0	0	0	0	0	0	0	0	NA	NA	74.2	1.2	0.010345789180145	0.000167317345231456	2.2	2.6	0.6	0	0.8	0	-4.12444259337938	TRUE	FALSE
"1"	102857419	102858876	"+"	"ENSRNOG00000012360_003i"	"ENSRNOG00000012360"	"Gtf2h1"	1457	2	16	2	12	19	0	0	0	0	3	0	0	24	35	18	10	10	14	10	15	3	0	30	0	0	2	0	0	0	0	0	0	0	0	0	0	0	0	2	1	0	0	0	0	0	0	0	0	0	0	NA	NA	10.2	0.6	0.00700068634179821	0.000411805078929307	19.4	8.4	0.4	0	0.6	0	-2.83321334405622	TRUE	FALSE
"1"	102859070	102860126	"+"	"ENSRNOG00000012360_004i"	"ENSRNOG00000012360"	"Gtf2h1"	1056	8	6	23	3	2	0	0	0	0	0	1	0	31	45	33	6	9	17	10	8	0	2	23	4	0	0	6	0	1	0	0	0	0	0	0	0	0	1	0	1	0	0	0	0	0	0	1	0	0	0	NA	NA	8.4	0	0.00795454545454546	0	24.8	7.4	1.4	0	0.4	0	-Inf	TRUE	FALSE
"1"	102860290	102862468	"+"	"ENSRNOG00000012360_005i"	"ENSRNOG00000012360"	"Gtf2h1"	2178	24	17	17	12	18	2	0	0	0	1	1	0	14	10	6	2	7	10	0	5	0	1	23	0	0	0	1	0	0	0	0	0	0	0	0	0	0	0	0	1	0	0	0	0	0	0	0	0	0	0	NA	NA	17.6	0.6	0.00808080808080808	0.000275482093663912	7.8	3.2	0.2	0	0.2	0	-3.3787245258101	TRUE	FALSE
"1"	102862563	102863919	"+"	"ENSRNOG00000012360_006i"	"ENSRNOG00000012360"	"Gtf2h1"	1356	22	10	20	17	17	0	0	0	1	0	13	0	8	16	21	6	5	5	4	0	0	0	19	1	0	0	3	0	0	0	0	0	0	0	0	0	3	0	3	0	4	0	0	0	0	0	0	0	0	0	NA	NA	17.2	0.2	0.0126843657817109	0.000147492625368732	11.2	1.8	0.6	0	2	0	-4.45434729625351	TRUE	FALSE
"1"	102864070	102864193	"+"	"ENSRNOG00000012360_007i"	"ENSRNOG00000012360"	"Gtf2h1"	123	1	2	0	0	0	0	0	0	0	0	0	0	7	17	14	6	1	1	0	8	0	5	13	3	0	0	0	0	0	0	0	0	0	0	0	0	1	2	0	0	0	0	0	0	0	0	0	0	0	0	NA	NA	0.6	0	0.0048780487804878	0	9	2.8	0	0	0.6	0	-Inf	FALSE	FALSE
"1"	102864274	102867285	"+"	"ENSRNOG00000012360_008i"	"ENSRNOG00000012360"	"Gtf2h1"	3011	13	74	36	66	68	0	0	0	1	1	22	0	24	30	34	19	6	60	30	14	8	8	40	10	1	6	2	3	0	0	0	0	0	0	0	0	0	1	0	3	4	0	0	0	0	0	0	0	0	0	NA	NA	51.4	0.4	0.017070740617735	0.00013284623048821	22.6	24	2.4	0	1.6	0	-4.85592890433527	TRUE	FALSE
"1"	102867414	102867518	"+"	"ENSRNOG00000012360_009i"	"ENSRNOG00000012360"	"Gtf2h1"	104	1	0	0	3	1	0	0	0	0	0	0	0	25	19	22	1	6	1	10	16	3	1	10	2	1	0	0	0	0	0	0	0	0	0	0	0	1	0	0	3	0	0	0	0	0	0	0	0	0	0	NA	NA	1	0	0.00961538461538462	0	14.6	6.2	0.2	0	0.8	0	-Inf	FALSE	FALSE
"1"	102867607	102869035	"+"	"ENSRNOG00000012360_010i"	"ENSRNOG00000012360"	"Gtf2h1"	1428	6	5	0	9	12	0	0	0	0	0	4	0	10	18	6	11	11	9	2	10	1	0	12	0	0	3	0	0	0	0	0	0	0	0	0	0	0	0	0	0	0	0	0	0	0	0	0	0	0	0	NA	NA	6.4	0	0.00448179271708684	0	11.2	4.4	0.6	0	0	0	-Inf	FALSE	FALSE
"1"	102869125	102870457	"+"	"ENSRNOG00000012360_011i"	"ENSRNOG00000012360"	"Gtf2h1"	1332	7	12	6	18	11	0	0	0	0	0	3	0	13	60	36	2	7	7	10	8	0	0	23	1	0	0	0	2	0	0	0	0	0	0	0	0	0	1	0	0	2	0	0	0	0	0	0	0	0	0	NA	NA	10.8	0	0.00810810810810811	0	23.6	5	0.4	0	0.6	0	-Inf	TRUE	FALSE
"1"	102870576	102871515	"+"	"ENSRNOG00000012360_012i"	"ENSRNOG00000012360"	"Gtf2h1"	939	6	3	0	6	6	2	0	0	0	4	4	0	34	34	29	8	7	10	8	16	0	7	54	3	0	2	0	1	1	0	0	0	0	0	0	0	0	0	0	1	1	0	0	0	0	0	2	0	0	0	NA	NA	4.2	1.2	0.00447284345047923	0.0012779552715655	22.4	8.2	0.8	0	0.4	0	-1.25276296849537	FALSE	FALSE
"1"	102871607	102872047	"+"	"ENSRNOG00000012360_013i"	"ENSRNOG00000012360"	"Gtf2h1"	440	2	4	0	1	1	0	0	0	0	0	1	0	10	13	8	2	1	8	5	3	1	2	22	2	0	2	0	1	1	0	0	0	0	0	0	0	0	0	0	0	0	0	0	0	0	0	0	0	0	0	NA	NA	1.6	0	0.00363636363636364	0	6.8	3.8	0.8	0	0	0	-Inf	FALSE	FALSE
"1"	102872164	102874779	"+"	"ENSRNOG00000012360_014i"	"ENSRNOG00000012360"	"Gtf2h1"	2615	11	10	16	11	16	0	6	5	0	1	13	0	20	25	17	34	47	2	0	1	12	16	7	0	2	0	4	0	0	0	0	5	0	0	0	0	0	3	0	1	2	0	0	0	0	0	0	0	0	0	NA	NA	12.8	2.4	0.00489483747609943	0.000917782026768642	28.6	6.2	1.2	1	1.2	0	-1.67397643357167	FALSE	FALSE
"1"	102874873	102876971	"+"	"ENSRNOG00000012360_015i"	"ENSRNOG00000012360"	"Gtf2h1"	2098	34	78	42	70	99	0	0	0	0	7	81	0	31	29	24	30	17	11	1	4	0	13	2	8	6	1	1	1	0	0	0	0	0	0	2	0	0	4	0	1	3	0	0	0	0	0	0	0	0	0	NA	NA	64.6	1.4	0.030791229742612	0.000667302192564347	26.2	5.8	1.8	0	1.6	0	-3.83174217416734	TRUE	FALSE
"1"	102900365	102902040	"+"	"ENSRNOG00000013009_001i"	"ENSRNOG00000013009"	"Ldha"	1675	32	36	25	20	27	0	0	0	1	0	44	8	138	145	174	25	17	66	57	73	3	35	422	4	0	0	0	0	0	0	0	0	0	0	2	0	8	3	4	1	1	0	0	0	0	0	0	0	0	0	NA	NA	28	0.2	0.0167164179104478	0.000119402985074627	99.8	46.8	0	0	3.4	0	-4.9416424226093	TRUE	FALSE
"1"	102902191	102903806	"+"	"ENSRNOG00000013009_002i"	"ENSRNOG00000013009"	"Ldha"	1615	33	57	53	101	86	4	0	0	0	0	2	0	271	391	373	72	78	210	144	113	38	11	252	66	1	6	0	21	13	0	0	0	0	0	0	0	0	6	0	0	1	0	0	0	0	0	0	0	0	0	NA	NA	66	0.8	0.0408668730650155	0.000495356037151703	237	103.2	8.2	0	1.4	0	-4.41279829334063	TRUE	FALSE
"1"	102903925	102904800	"+"	"ENSRNOG00000013009_003i"	"ENSRNOG00000013009"	"Ldha"	875	8	10	3	17	10	0	0	0	0	0	0	0	238	281	252	244	201	128	104	74	95	82	809	22	0	0	0	1	0	0	0	0	0	0	0	0	0	0	0	0	2	0	0	0	0	0	0	0	0	0	NA	NA	9.6	0	0.0109714285714286	0	243.2	96.6	0.2	0	0.4	0	-Inf	TRUE	FALSE
"1"	102904975	102905315	"+"	"ENSRNOG00000013009_004i"	"ENSRNOG00000013009"	"Ldha"	340	4	0	6	0	4	0	0	0	0	0	0	0	274	292	310	205	179	150	146	103	86	91	569	128	0	0	0	0	0	0	0	0	0	0	0	0	3	0	1	0	0	0	0	0	0	0	0	0	0	0	NA	NA	2.8	0	0.00823529411764706	0	252	115.2	0	0	0.8	0	-Inf	FALSE	FALSE
"1"	102905490	102906298	"+"	"ENSRNOG00000013009_005i"	"ENSRNOG00000013009"	"Ldha"	808	15	11	10	28	24	0	0	2	1	7	43	1	191	305	237	79	71	115	66	80	39	35	318	35	4	0	0	0	1	0	0	0	0	0	0	0	3	2	0	2	4	0	0	2	0	0	2	0	0	0	NA	NA	17.6	2	0.0217821782178218	0.00247524752475248	176.6	67	1	0	2.2	0.4	-2.17475172148416	TRUE	FALSE
"1"	102906417	102908462	"+"	"ENSRNOG00000013009_006i"	"ENSRNOG00000013009"	"Ldha"	2045	18	20	54	121	108	0	0	0	1	3	79	0	140	208	176	64	88	66	51	49	29	23	826	98	0	0	1	1	0	0	0	0	0	0	0	0	0	0	4	5	4	0	0	0	0	0	2	0	0	0	NA	NA	64.2	0.8	0.0313936430317848	0.00039119804400978	135.2	43.6	0.4	0	2.6	0	-4.38514676201012	TRUE	FALSE
"1"	102908587	102909044	"+"	"ENSRNOG00000013009_007i"	"ENSRNOG00000013009"	"Ldha"	457	7	5	0	0	3	0	0	0	0	0	5	0	130	125	77	79	102	92	34	27	28	33	685	109	0	0	0	0	0	0	0	0	0	0	0	0	3	0	0	0	0	0	0	0	0	0	2	0	0	0	NA	NA	3	0	0.00656455142231947	0	102.6	42.8	0	0	0.6	0	-Inf	FALSE	FALSE
"1"	102915287	102915647	"+"	"ENSRNOG00000052397+ENSRNOG00000013103_001i"	"ENSRNOG00000013103"	"Ldhc"	360	0	0	0	0	0	0	0	0	0	0	0	0	0	0	0	0	0	0	0	0	0	0	0	0	0	0	0	0	0	0	0	0	0	0	0	0	0	0	0	0	0	0	0	0	0	0	0	0	0	0	NA	NA	0	0	0	0	0	0	0	0	0	0	NA	FALSE	FALSE
"1"	102915781	102920310	"+"	"ENSRNOG00000052397+ENSRNOG00000013103_004i"	"ENSRNOG00000013103"	"Ldhc"	4529	0	0	0	0	3	0	0	1	0	1	2	0	0	0	0	0	0	0	0	0	0	0	0	0	0	0	0	0	0	0	0	0	0	0	0	0	0	0	0	0	0	0	0	0	0	0	0	0	0	0	NA	NA	0.6	0.4	0.000132479576065357	8.83197173769044e-05	0	0	0	0	0	0	-0.405465108108164	FALSE	FALSE
"1"	102920429	102922862	"+"	"ENSRNOG00000052397+ENSRNOG00000013103_005i"	"ENSRNOG00000013103"	"Ldhc"	2433	0	0	0	0	0	0	0	0	0	3	0	0	0	0	0	0	0	0	0	0	0	0	0	0	0	0	0	0	0	0	0	0	0	1	0	0	0	0	0	0	0	0	0	0	0	0	0	0	0	0	NA	NA	0	0.6	0	0.000246609124537608	0	0	0	0.2	0	0	Inf	FALSE	FALSE
"1"	102922931	102924058	"+"	"ENSRNOG00000052397+ENSRNOG00000013103_006i"	"ENSRNOG00000013103"	"Ldhc"	1127	0	0	0	0	0	0	0	0	0	0	0	0	0	0	0	0	0	0	0	0	0	0	0	0	0	0	0	0	0	0	0	0	0	0	0	0	0	0	0	0	0	0	0	0	0	0	0	0	0	0	NA	NA	0	0	0	0	0	0	0	0	0	0	NA	FALSE	FALSE
"1"	102924379	102926946	"+"	"ENSRNOG00000052397+ENSRNOG00000013103_013i"	"ENSRNOG00000013103"	"Ldhc"	2567	0	3	0	3	2	6	0	0	0	0	0	0	0	0	0	0	0	0	0	0	0	0	0	0	0	0	0	0	0	0	0	0	0	0	0	0	0	0	0	0	0	0	0	0	0	0	0	0	0	0	NA	NA	1.6	1.2	0.000623295675886249	0.000467471756914686	0	0	0	0	0	0	-0.287682072451781	FALSE	FALSE
"1"	102927121	102929680	"+"	"ENSRNOG00000052397+ENSRNOG00000013103_014i"	"ENSRNOG00000013103"	"Ldhc"	2559	0	0	0	1	1	0	0	0	0	0	0	0	0	0	0	0	0	0	0	0	0	0	0	0	0	0	0	0	0	0	0	0	0	0	0	0	0	0	0	0	0	0	0	0	0	0	0	0	0	0	NA	NA	0.4	0	0.000156311059007425	0	0	0	0	0	0	0	-Inf	FALSE	FALSE
"1"	102929799	102930266	"+"	"ENSRNOG00000052397+ENSRNOG00000013103_017i"	"ENSRNOG00000013103"	"Ldhc"	467	0	0	0	0	0	0	0	0	0	0	7	0	0	0	0	0	0	0	0	0	0	0	0	0	0	0	0	0	0	0	0	0	0	0	0	0	0	0	0	0	0	0	0	0	0	0	0	0	0	0	NA	NA	0	0	0	0	0	0	0	0	0	0	NA	FALSE	FALSE
"1"	102930273	102930376	"+"	"ENSRNOG00000052397+ENSRNOG00000013103_018i"	"ENSRNOG00000013103"	"Ldhc"	103	0	0	0	0	0	0	0	0	0	0	0	0	0	0	0	0	0	0	0	0	0	0	0	0	0	0	0	0	0	0	0	0	0	0	0	0	0	0	0	0	0	0	0	0	0	0	0	0	0	0	NA	NA	0	0	0	0	0	0	0	0	0	0	NA	FALSE	FALSE
"1"	102930501	102931609	"+"	"ENSRNOG00000052397+ENSRNOG00000013103_019i"	"ENSRNOG00000013103"	"Ldhc"	1108	2	0	0	0	1	0	0	0	0	0	0	0	0	0	0	0	0	0	0	0	0	0	0	0	0	0	0	0	0	0	0	0	0	0	0	0	0	0	0	0	0	0	0	0	0	0	0	0	0	0	NA	NA	0.6	0	0.000541516245487365	0	0	0	0	0	0	0	-Inf	FALSE	FALSE
"1"	102941567	102942469	"-"	"ENSRNOG00000013381_001i"	"ENSRNOG00000013381"	"Tsg101"	902	6	7	6	22	15	0	0	0	0	1	6	0	19	16	16	12	11	6	3	0	7	0	234	3	1	2	6	5	3	0	0	0	0	0	0	0	1	0	0	0	0	0	0	0	0	0	6	0	0	0	NA	NA	11.2	0.2	0.0124168514412417	0.000221729490022173	14.8	3.2	3.4	0	0.2	0	-4.02535169073515	TRUE	FALSE
"1"	102942710	102943494	"-"	"ENSRNOG00000013381_002i"	"ENSRNOG00000013381"	"Tsg101"	784	0	2	2	2	1	0	0	0	0	0	0	0	10	15	14	5	2	10	9	16	5	0	49	1	0	0	0	0	0	0	0	0	0	0	0	0	0	0	1	0	0	0	0	0	0	0	0	0	0	0	NA	NA	1.4	0	0.00178571428571429	0	9.2	8	0	0	0.2	0	-Inf	FALSE	FALSE
"1"	102943698	102952106	"-"	"ENSRNOG00000013381_003i"	"ENSRNOG00000013381"	"Tsg101"	8408	20	15	8	76	72	0	5	0	0	5	35	2	7	26	14	21	8	12	0	2	10	11	69	1	0	0	0	0	0	0	0	0	0	0	0	0	0	0	0	1	0	0	0	0	0	0	0	0	0	0	NA	NA	38.2	2	0.00454329210275928	0.000237868696479543	15.2	7	0	0	0.2	0	-2.94968833505258	FALSE	FALSE
"1"	102952199	102954199	"-"	"ENSRNOG00000013381_004i"	"ENSRNOG00000013381"	"Tsg101"	2000	19	17	19	58	87	0	0	0	0	3	80	1	128	106	100	157	131	67	83	48	88	72	165	6	0	0	0	0	0	0	0	0	0	0	0	1	3	3	1	3	7	0	0	0	0	0	2	0	0	0	NA	NA	40	0.6	0.02	3e-04	124.4	71.6	0	0	3.4	0	-4.19970507787993	TRUE	FALSE
"1"	102954267	102957681	"-"	"ENSRNOG00000013381_005i"	"ENSRNOG00000013381"	"Tsg101"	3414	52	76	82	260	227	0	0	0	1	6	74	0	87	131	98	165	143	64	46	47	71	76	149	2	1	8	0	3	1	0	0	0	0	0	1	0	2	1	5	1	0	0	0	0	0	0	1	0	0	0	NA	NA	139.4	1.4	0.0408318687756298	0.000410076157000586	124.8	60.8	2.6	0	1.8	0	-4.60087526170521	TRUE	FALSE
"1"	102957809	102959528	"-"	"ENSRNOG00000013381_006i"	"ENSRNOG00000013381"	"Tsg101"	1719	16	14	14	18	20	7	0	0	0	2	7	3	65	80	73	35	27	47	50	29	10	16	147	10	0	0	2	0	0	0	0	0	0	0	0	0	1	0	1	0	0	0	0	0	0	0	1	0	0	0	NA	NA	16.4	1.8	0.00954043048283886	0.00104712041884817	56	30.4	0.4	0	0.4	0	-2.20949466992803	TRUE	FALSE
"1"	102959693	102961361	"-"	"ENSRNOG00000013381_007i"	"ENSRNOG00000013381"	"Tsg101"	1668	13	24	49	18	28	0	0	6	6	1	29	1	217	263	203	239	230	157	59	85	82	90	42	2	0	0	3	0	0	0	0	0	0	0	0	0	2	2	4	4	3	0	0	0	0	1	3	0	0	0	NA	NA	26.4	2.6	0.0158273381294964	0.00155875299760192	230.4	94.6	0.6	0	3	0.2	-2.31785256512483	TRUE	FALSE
"1"	102961428	102963746	"-"	"ENSRNOG00000013381_008i"	"ENSRNOG00000013381"	"Tsg101"	2318	0	6	4	22	15	0	0	0	0	0	0	1	2	19	11	0	2	7	0	6	10	3	93	4	0	0	0	0	0	0	0	0	0	0	0	0	0	0	0	0	0	0	0	0	0	0	0	0	0	0	NA	NA	9.4	0	0.00405522001725626	0	6.8	5.2	0	0	0	0	-Inf	FALSE	FALSE
"1"	102963832	102970867	"-"	"ENSRNOG00000013381_009i"	"ENSRNOG00000013381"	"Tsg101"	7035	9	16	21	32	30	0	0	0	0	1	10	1	1	5	6	1	4	7	0	0	0	0	81	34	0	0	0	0	2	0	0	0	0	0	0	0	0	0	0	0	2	0	0	0	0	0	0	0	0	0	NA	NA	21.6	0.2	0.00307036247334755	2.84292821606254e-05	3.4	1.4	0.4	0	0.4	0	-4.68213122712422	FALSE	FALSE
"1"	102983546	102984426	"-"	"ENSRNOG00000013624_001i"	"ENSRNOG00000013624"	"Uevld"	880	2	8	5	1	2	0	0	0	0	2	6	0	2	4	6	2	0	0	0	0	0	0	0	0	0	0	0	0	0	0	0	0	0	2	0	0	0	0	2	0	0	0	0	0	0	0	0	0	0	0	NA	NA	3.6	0.4	0.00409090909090909	0.000454545454545455	2.8	0	0	0.4	0.4	0	-2.19722457733622	FALSE	FALSE
"1"	102984551	102987403	"-"	"ENSRNOG00000013624_002i"	"ENSRNOG00000013624"	"Uevld"	2852	4	13	6	12	18	0	0	0	0	0	0	0	2	0	0	0	0	0	0	0	0	0	0	0	0	0	0	0	0	0	0	0	0	0	0	0	0	0	0	0	0	0	0	0	0	0	0	0	0	0	NA	NA	10.6	0	0.00371669004207574	0	0.4	0	0	0	0	0	-Inf	FALSE	FALSE
"1"	102987468	102994188	"-"	"ENSRNOG00000013624_003i"	"ENSRNOG00000013624"	"Uevld"	6720	6	6	5	15	16	0	0	0	1	0	9	0	0	0	2	0	0	0	0	0	0	0	0	0	0	0	0	0	0	0	0	0	0	0	0	0	0	0	0	0	0	0	0	0	0	0	0	0	0	0	NA	NA	9.6	0.2	0.00142857142857143	2.97619047619048e-05	0.4	0	0	0	0	0	-3.87120101090789	FALSE	FALSE
"1"	102994363	102996512	"-"	"ENSRNOG00000013624_004i"	"ENSRNOG00000013624"	"Uevld"	2149	2	5	2	5	3	0	0	0	0	0	0	0	8	1	1	0	1	0	0	0	0	0	0	0	0	0	0	0	0	0	0	0	0	0	0	0	0	3	0	0	0	0	0	0	0	0	0	0	0	0	NA	NA	3.4	0	0.00158213122382503	0	2.2	0	0	0	0.6	0	-Inf	FALSE	FALSE
"1"	102996684	102999436	"-"	"ENSRNOG00000013624_005i"	"ENSRNOG00000013624"	"Uevld"	2752	2	13	12	18	15	0	0	0	0	0	9	0	0	1	3	0	0	2	0	0	0	0	0	1	0	2	0	0	2	0	0	0	0	0	0	0	0	0	0	0	0	0	0	0	0	0	0	0	0	0	NA	NA	12	0	0.00436046511627907	0	0.8	0.4	0.8	0	0	0	-Inf	FALSE	FALSE
"1"	102999540	103001345	"-"	"ENSRNOG00000013624_006i"	"ENSRNOG00000013624"	"Uevld"	1805	5	0	0	11	9	0	0	0	0	0	12	3	1	0	0	2	0	0	0	0	0	4	0	0	0	0	0	1	1	0	0	0	0	0	0	0	0	0	0	1	0	0	0	0	0	0	0	0	0	0	NA	NA	5	0	0.00277008310249307	0	0.6	0.8	0.4	0	0.2	0	-Inf	FALSE	FALSE
"1"	103001465	103003394	"-"	"ENSRNOG00000013624_007i"	"ENSRNOG00000013624"	"Uevld"	1929	6	3	2	4	8	0	0	0	0	0	1	1	2	0	0	2	1	2	0	2	0	4	0	0	0	0	0	0	0	0	0	0	0	0	0	0	0	0	0	0	0	0	0	0	0	0	0	0	0	0	NA	NA	4.6	0	0.00238465526179368	0	1	1.6	0	0	0	0	-Inf	FALSE	FALSE
"1"	103003531	103005673	"-"	"ENSRNOG00000013624_008i"	"ENSRNOG00000013624"	"Uevld"	2142	1	6	7	13	10	0	0	0	0	0	0	0	2	4	5	2	1	0	0	0	5	0	0	0	1	0	0	3	6	0	0	0	0	0	0	0	0	0	0	0	0	0	0	0	0	0	0	0	0	0	NA	NA	7.4	0	0.0034547152194211	0	2.8	1	2	0	0	0	-Inf	FALSE	FALSE
"1"	103005838	103010099	"-"	"ENSRNOG00000013624_009i"	"ENSRNOG00000013624"	"Uevld"	4261	12	14	23	21	25	0	0	0	1	0	9	0	9	26	11	12	13	4	1	0	8	6	0	0	0	2	0	0	0	0	0	0	0	0	0	0	1	0	4	1	2	0	0	0	0	0	2	0	0	0	NA	NA	19	0.2	0.00445904717202535	4.69373386528984e-05	14.2	3.8	0.4	0	1.6	0	-4.55387689160054	FALSE	FALSE
"1"	103010166	103010695	"-"	"ENSRNOG00000013624_010i"	"ENSRNOG00000013624"	"Uevld"	529	2	2	1	1	1	0	0	0	0	0	0	0	5	6	1	0	0	0	0	0	0	0	0	1	0	0	0	0	0	0	0	0	0	0	0	0	0	0	0	0	0	0	0	0	0	0	0	0	0	0	NA	NA	1.4	0	0.00264650283553875	0	2.4	0	0	0	0	0	-Inf	FALSE	FALSE
"1"	103010781	103014300	"-"	"ENSRNOG00000013624_011i"	"ENSRNOG00000013624"	"Uevld"	3519	0	5	5	7	14	0	0	1	0	0	1	1	1	0	0	0	0	0	0	0	0	0	0	1	0	0	0	0	0	0	0	0	0	0	0	0	0	0	0	0	0	0	0	0	0	0	0	0	0	0	NA	NA	6.2	0.2	0.00176186416595624	5.68343279340722e-05	0.2	0	0	0	0	0	-3.43398720448515	FALSE	FALSE
"1"	103053104	103053603	"+"	"ENSRNOG00000058252_001i"	"ENSRNOG00000058252"	"Gm9999"	499	0	3	1	6	9	0	0	0	0	4	3	0	0	0	0	0	0	0	4	0	0	0	0	0	0	3	0	1	2	0	0	0	0	0	0	0	0	0	1	0	0	0	0	0	0	0	0	0	0	0	NA	NA	3.8	0.8	0.00761523046092184	0.00160320641282565	0	0.8	1.2	0	0.2	0	-1.55814461804655	FALSE	FALSE
"1"	103119310	103120013	"-"	"ENSRNOG00000050806_001i"	"ENSRNOG00000050806"	"Spty2d1"	703	2	3	3	4	6	0	0	0	0	0	4	1	14	10	22	2	1	12	9	7	0	0	0	0	0	3	0	0	0	0	0	0	0	0	0	0	0	0	0	0	0	0	0	0	0	0	0	1	0	0	NA	NA	3.6	0	0.00512091038406828	0	9.8	5.6	0.6	0	0	0	-Inf	TRUE	FALSE
"1"	103120129	103128459	"-"	"ENSRNOG00000050806_002i"	"ENSRNOG00000050806"	"Spty2d1"	8330	58	60	63	91	91	0	0	3	1	6	19	0	15	18	28	8	13	4	0	4	0	3	3	0	2	0	0	0	0	0	0	0	0	0	0	0	3	2	4	1	1	0	0	0	0	0	0	0	0	0	NA	NA	72.6	2	0.00871548619447779	0.000240096038415366	16.4	2.2	0.4	0	2.2	0	-3.5918177412708	TRUE	FALSE
"1"	103146053	103146162	"+"	"ENSRNOG00000050257_001i"	"ENSRNOG00000050257"	"AABR07003273.1"	109	0	0	0	0	0	0	0	0	0	0	0	2	0	0	0	0	0	0	0	1	0	0	0	0	0	0	0	0	0	0	0	0	0	0	0	1	0	0	0	0	0	0	0	0	0	0	0	0	0	0	NA	NA	0	0	0	0	0	0.2	0	0	0	0	NA	FALSE	FALSE
"1"	103173144	103175117	"+"	"ENSRNOG00000013663_001i"	"ENSRNOG00000013663"	"Tmem86a"	1973	2	8	1	13	13	0	0	2	0	2	2	0	0	3	4	5	7	0	0	0	0	2	2	1	0	0	0	0	1	0	0	0	0	0	0	0	0	0	0	0	0	0	0	0	0	0	0	0	0	0	NA	NA	7.4	0.8	0.00375063355296503	0.000405473897617841	3.8	0.4	0.2	0	0	0	-2.22462355152433	FALSE	FALSE
"1"	103175383	103176028	"+"	"ENSRNOG00000013663_002i"	"ENSRNOG00000013663"	"Tmem86a"	645	0	0	0	1	2	0	0	0	0	0	2	0	0	0	1	0	1	0	3	0	0	0	12	1	0	0	0	0	0	0	0	0	0	0	0	0	0	0	0	0	0	0	0	0	0	0	0	0	0	0	NA	NA	0.6	0	0.000930232558139535	0	0.4	0.6	0	0	0	0	-Inf	FALSE	FALSE
"1"	103198985	103199294	"-"	"ENSRNOG00000013981_001i"	"ENSRNOG00000013981"	"Ptpn5"	309	0	3	2	1	2	0	0	0	0	0	1	0	7	8	16	10	25	21	0	4	10	2	114	0	0	3	0	0	1	0	0	0	0	0	0	0	0	0	0	0	0	0	0	0	0	0	0	0	0	0	NA	NA	1.6	0	0.00517799352750809	0	13.2	7.4	0.8	0	0	0	-Inf	FALSE	FALSE
"1"	103199409	103199496	"-"	"ENSRNOG00000013981_002i"	"ENSRNOG00000013981"	"Ptpn5"	87	0	3	1	2	0	0	0	0	0	0	0	0	3	9	8	1	14	5	11	1	4	1	74	0	0	0	1	0	0	0	0	0	0	0	0	0	0	3	0	2	0	0	0	0	0	0	0	0	0	0	NA	NA	1.2	0	0.0137931034482759	0	7	4.4	0.2	0	1	0	-Inf	FALSE	FALSE
"1"	103199658	103201967	"-"	"ENSRNOG00000013981_003i"	"ENSRNOG00000013981"	"Ptpn5"	2309	8	3	9	38	43	0	0	0	0	3	5	0	21	14	15	24	31	22	15	5	20	17	66	0	0	0	8	4	0	0	0	0	0	0	1	0	0	1	0	0	0	0	0	0	0	0	0	0	0	0	NA	NA	20.2	0.6	0.00874837592031182	0.000259852750108272	21	15.8	2.4	0	0.2	0	-3.51650822817315	TRUE	FALSE
"1"	103202079	103203311	"-"	"ENSRNOG00000013981_004i"	"ENSRNOG00000013981"	"Ptpn5"	1232	0	0	0	6	8	0	0	0	0	1	0	0	15	6	7	5	10	8	0	3	0	9	52	1	0	0	0	0	1	0	0	0	0	0	0	0	0	0	0	0	0	0	0	0	0	0	0	0	0	0	NA	NA	2.8	0.2	0.00227272727272727	0.000162337662337662	8.6	4	0.2	0	0	0	-2.63905732961526	FALSE	FALSE
"1"	103203450	103203638	"-"	"ENSRNOG00000013981_005i"	"ENSRNOG00000013981"	"Ptpn5"	188	1	0	0	1	0	0	0	0	0	0	0	0	12	12	18	7	8	9	2	8	1	5	30	0	0	0	0	0	0	0	0	0	0	0	0	0	1	0	0	1	0	0	0	0	0	0	0	0	0	0	NA	NA	0.4	0	0.00212765957446809	0	11.4	5	0	0	0.4	0	-Inf	FALSE	FALSE
"1"	103203719	103206853	"-"	"ENSRNOG00000013981_006i"	"ENSRNOG00000013981"	"Ptpn5"	3134	25	21	21	84	176	0	0	0	1	3	6	0	17	15	17	12	14	3	2	12	10	4	82	0	0	0	0	0	2	0	0	0	0	0	0	0	4	0	0	4	1	0	0	0	0	0	0	0	0	0	NA	NA	65.4	0.8	0.0208679004467135	0.000255264837268666	15	6.2	0.4	0	1.8	0	-4.40366580977736	TRUE	FALSE
"1"	103206939	103209261	"-"	"ENSRNOG00000013981_007i"	"ENSRNOG00000013981"	"Ptpn5"	2322	12	2	12	18	32	0	0	0	0	2	0	0	4	0	6	4	15	17	0	7	4	1	41	2	3	1	1	1	5	0	0	0	0	0	0	0	0	0	0	0	0	0	0	0	0	0	0	0	0	0	NA	NA	15.2	0.4	0.00654608096468562	0.000172265288544358	5.8	5.8	2.2	0	0	0	-3.63758615972639	TRUE	FALSE
"1"	103209452	103210510	"-"	"ENSRNOG00000013981_008i"	"ENSRNOG00000013981"	"Ptpn5"	1058	7	1	9	29	45	0	0	0	7	0	0	0	20	9	16	1	5	4	0	4	4	6	66	1	0	0	0	0	0	0	0	0	0	0	0	0	1	0	0	0	0	0	0	0	0	0	0	0	0	0	NA	NA	18.2	1.4	0.0172022684310019	0.00132325141776938	10.2	3.6	0	0	0.2	0	-2.56494935746154	TRUE	FALSE
"1"	103210753	103211172	"-"	"ENSRNOG00000013981_009i"	"ENSRNOG00000013981"	"Ptpn5"	419	7	13	18	21	64	0	0	0	1	4	6	0	15	10	29	26	42	20	23	19	12	16	104	10	3	6	10	8	38	0	0	0	0	3	1	0	0	0	0	1	1	0	0	0	1	0	0	0	0	0	NA	NA	24.6	1	0.0587112171837709	0.00238663484486874	24.4	18	13	0.6	0.4	0.2	-3.20274644293832	TRUE	FALSE
"1"	103211257	103211485	"-"	"ENSRNOG00000013981_010i"	"ENSRNOG00000013981"	"Ptpn5"	228	23	5	22	35	33	0	0	0	0	0	14	0	7	5	7	3	14	12	2	8	0	0	82	10	11	0	13	15	10	0	0	0	0	0	1	0	4	4	3	3	8	0	0	0	0	0	2	0	0	0	NA	NA	23.6	0	0.103508771929825	0	7.2	4.4	9.8	0	4.4	0	-Inf	TRUE	FALSE
"1"	103211594	103212114	"-"	"ENSRNOG00000013981_011i"	"ENSRNOG00000013981"	"Ptpn5"	520	21	11	40	155	243	2	0	0	1	6	138	2	12	11	19	32	81	23	27	11	36	25	12	0	1	2	1	5	23	2	0	0	0	0	0	0	5	1	11	28	39	0	0	0	0	0	6	0	0	0	NA	NA	94	1.8	0.180769230769231	0.00346153846153846	31	24.4	6.4	0.4	16.8	0	-3.95550811736788	TRUE	FALSE
"1"	103212306	103236963	"-"	"ENSRNOG00000013981_012i"	"ENSRNOG00000013981"	"Ptpn5"	24657	157	110	282	307	462	6	7	6	35	55	193	3	30	18	26	41	71	9	0	11	31	13	0	0	5	1	0	1	4	0	0	0	0	0	0	0	0	0	0	4	0	0	0	0	0	0	0	0	0	0	NA	NA	263.6	21.8	0.0106906760757594	0.000884130267266902	37.2	12.8	2.2	0	0.8	0	-2.49252283283331	TRUE	FALSE
"1"	103237041	103237573	"-"	"ENSRNOG00000013981_013i"	"ENSRNOG00000013981"	"Ptpn5"	532	2	0	0	0	1	0	0	0	0	0	4	2	6	1	11	1	3	3	3	9	1	1	5	0	0	0	0	0	0	0	0	0	0	0	1	0	0	0	0	0	0	0	0	0	0	0	0	0	0	0	NA	NA	0.6	0	0.00112781954887218	0	4.4	3.4	0	0	0	0	-Inf	FALSE	FALSE
"1"	103237734	103240595	"-"	"ENSRNOG00000013981_014i"	"ENSRNOG00000013981"	"Ptpn5"	2861	37	16	42	33	53	0	0	1	1	1	12	1	16	7	27	11	15	0	4	7	0	1	4	0	4	1	5	0	0	0	0	1	0	0	0	0	1	1	1	0	3	0	0	0	0	0	0	0	0	0	NA	NA	36.2	0.6	0.0126529185599441	0.000209716882209018	15.2	2.4	2	0.2	1.2	0	-4.09988474259772	TRUE	FALSE
"1"	103240688	103256560	"-"	"ENSRNOG00000013981_015i"	"ENSRNOG00000013981"	"Ptpn5"	15872	168	149	237	242	446	3	0	3	3	10	22	0	5	6	23	3	18	2	2	7	5	5	1	4	2	1	4	0	2	0	0	0	0	0	0	0	3	0	2	0	4	0	0	0	0	0	0	0	0	0	35	NA	248.4	3.8	0.0156502016129032	0.000239415322580645	11	4.2	1.8	0	1.8	0	-4.18003928332698	TRUE	FALSE
"1"	103299394	103323411	"-"	"ENSRNOG00000014227_001i"	"ENSRNOG00000014227"	"Mrgprx3"	24017	2	3	1	0	0	0	0	5	0	11	1	1	0	0	0	0	0	0	0	0	0	0	0	0	0	0	0	0	0	0	0	0	0	0	0	0	0	0	0	0	0	0	0	0	0	0	0	0	0	0	NA	NA	1.2	3.2	4.99646084023816e-05	0.000133238955739684	0	0	0	0	0	0	0.980829253011726	FALSE	FALSE
"1"	103745675	103760726	"-"	"ENSRNOG00000033665_001i"	"ENSRNOG00000033665"	"Mrgprx2"	15051	0	0	0	0	0	0	0	2	0	0	0	0	0	0	0	0	0	0	0	0	0	0	0	0	0	0	0	0	0	0	0	0	0	0	0	0	0	0	0	0	0	0	0	0	0	0	0	0	0	0	NA	NA	0	0.4	0	2.65763072221115e-05	0	0	0	0	0	0	Inf	FALSE	FALSE
"1"	103900602	103909842	"-"	"ENSRNOG00000028982_001i"	"ENSRNOG00000028982"	"Mrgprb3"	9240	0	0	0	0	0	0	0	0	0	0	10	1	0	0	0	0	0	0	0	0	0	0	0	0	0	0	0	0	0	0	0	0	0	0	0	0	0	0	0	0	0	0	0	0	0	0	0	0	0	0	NA	NA	0	0	0	0	0	0	0	0	0	0	NA	FALSE	FALSE
"1"	104001088	104009808	"-"	"ENSRNOG00000014266_001i"	"ENSRNOG00000014266"	"RGD1560730"	8720	0	0	0	0	0	0	0	3	0	8	0	0	0	0	0	0	0	0	0	0	0	0	0	0	0	0	0	0	0	0	0	0	0	0	0	0	0	0	0	0	0	0	0	0	0	0	0	0	0	0	NA	NA	0	2.2	0	0.000252293577981651	0	0	0	0	0	0	Inf	FALSE	FALSE
"1"	104106320	104112526	"+"	"ENSRNOG00000014277_002i"	"ENSRNOG00000014277"	"Zdhhc13"	6206	131	211	176	445	480	0	0	0	3	10	12	0	0	2	0	0	0	0	0	0	0	0	15	3	1	0	0	0	2	0	0	0	0	0	0	0	0	0	0	0	0	0	0	0	0	0	0	0	0	0	NA	NA	288.6	2.6	0.0465033838221076	0.000418949403802772	0.4	0	0.6	0	0	0	-4.70953020131233	TRUE	FALSE
"1"	104112673	104115788	"+"	"ENSRNOG00000014277_003i"	"ENSRNOG00000014277"	"Zdhhc13"	3115	0	0	3	0	0	0	0	0	0	0	60	0	10	22	31	12	8	6	2	8	1	0	19	3	0	0	3	0	0	0	0	0	0	0	0	0	0	0	0	0	0	0	0	0	0	0	0	0	0	0	NA	NA	0.6	0	0.000192616372391653	0	16.6	3.4	0.6	0	0	0	-Inf	FALSE	FALSE
"1"	104115912	104117832	"+"	"ENSRNOG00000014277_004i"	"ENSRNOG00000014277"	"Zdhhc13"	1920	54	74	48	267	270	0	2	0	2	2	6	0	19	4	17	17	36	0	9	1	3	0	22	4	0	0	0	0	1	0	0	0	0	0	0	0	2	0	0	0	3	0	0	0	0	0	0	0	0	0	NA	NA	142.6	1.2	0.0742708333333333	0.000625	18.6	2.6	0.2	0	1	0	-4.77772195118624	TRUE	FALSE
"1"	104117911	104119332	"+"	"ENSRNOG00000014277_005i"	"ENSRNOG00000014277"	"Zdhhc13"	1421	3	11	27	21	38	0	0	0	0	6	1	0	21	20	11	23	12	11	0	0	1	0	42	0	0	0	0	2	2	0	0	0	0	0	0	0	0	0	0	0	1	0	0	0	0	0	0	0	0	0	NA	NA	20	1.2	0.0140745953553835	0.000844475721323012	17.4	2.4	0.8	0	0.2	0	-2.81341071676004	TRUE	FALSE
"1"	104119478	104121429	"+"	"ENSRNOG00000014277_006i"	"ENSRNOG00000014277"	"Zdhhc13"	1951	21	6	9	63	46	0	0	0	0	1	1	0	3	9	9	1	0	0	0	0	0	0	14	2	0	0	0	0	0	0	0	0	0	0	0	0	0	0	0	0	0	0	0	0	0	0	0	0	0	0	NA	NA	29	0.2	0.0148641722193747	0.000102511532547412	4.4	0	0	0	0	0	-4.97673374242057	TRUE	FALSE
"1"	104121495	104121939	"+"	"ENSRNOG00000014277_007i"	"ENSRNOG00000014277"	"Zdhhc13"	444	0	0	0	0	0	0	0	0	0	0	0	0	9	12	14	19	27	6	0	9	4	5	24	4	0	0	0	0	0	0	0	0	0	0	0	0	0	0	0	0	0	0	0	0	0	0	0	0	0	0	NA	NA	0	0	0	0	16.2	4.8	0	0	0	0	NA	FALSE	FALSE
"1"	104122005	104122778	"+"	"ENSRNOG00000014277_008i"	"ENSRNOG00000014277"	"Zdhhc13"	773	7	6	14	17	12	0	0	0	0	0	0	0	7	3	12	11	19	6	0	9	4	1	35	22	0	0	0	0	0	0	0	0	0	0	0	0	4	0	1	5	0	0	0	0	0	0	0	0	0	0	NA	NA	11.2	0	0.0144890038809832	0	10.4	4	0	0	2	0	-Inf	TRUE	FALSE
"1"	104122942	104123182	"+"	"ENSRNOG00000014277_009i"	"ENSRNOG00000014277"	"Zdhhc13"	240	0	4	2	1	1	0	0	0	0	0	0	0	17	17	17	11	9	0	3	0	0	1	16	11	0	4	0	1	0	0	0	0	0	0	0	0	0	0	0	0	1	0	0	0	0	0	0	0	0	0	NA	NA	1.6	0	0.00666666666666667	0	14.2	0.8	1	0	0.2	0	-Inf	FALSE	FALSE
"1"	104123309	104124996	"+"	"ENSRNOG00000014277_010i"	"ENSRNOG00000014277"	"Zdhhc13"	1687	25	41	48	105	84	0	0	0	2	4	0	0	7	13	8	7	8	0	0	8	0	0	21	2	5	3	0	2	0	0	0	0	0	0	0	0	0	0	0	1	2	0	0	0	0	0	0	0	0	0	NA	NA	60.6	1.2	0.0359217545939538	0.000711321873147599	8.6	1.6	2	0	0.6	0	-3.92197333628131	TRUE	FALSE
"1"	104125131	104127786	"+"	"ENSRNOG00000014277_011i"	"ENSRNOG00000014277"	"Zdhhc13"	2655	41	49	45	140	129	0	1	0	4	6	10	0	16	10	4	10	19	0	0	2	5	2	14	2	0	0	0	0	2	0	0	0	0	0	0	0	2	0	1	0	3	0	0	0	0	0	0	0	0	0	NA	NA	80.8	2.2	0.0304331450094162	0.000828625235404896	11.8	1.8	0.4	0	1.2	0	-3.60351960516278	TRUE	FALSE
"1"	104127890	104132835	"+"	"ENSRNOG00000014277_013i"	"ENSRNOG00000014277"	"Zdhhc13"	4945	122	179	163	281	304	0	0	4	0	2	22	0	25	21	25	24	22	4	0	0	3	9	36	6	6	2	4	0	1	0	0	0	0	0	1	0	0	0	0	1	0	0	0	0	0	0	0	0	0	0	29	NA	209.8	1.2	0.0424266936299292	0.000242669362992922	23.4	3.2	2.6	0	0.2	0	-5.16383313916824	TRUE	FALSE
"1"	104132961	104133783	"+"	"ENSRNOG00000014277_015i"	"ENSRNOG00000014277"	"Zdhhc13"	822	25	36	24	20	18	0	0	0	0	0	7	0	26	35	43	11	18	0	0	3	3	9	11	4	0	0	1	2	0	0	0	0	0	0	0	0	0	2	0	3	0	0	0	0	0	0	0	0	0	0	NA	NA	24.6	0	0.0299270072992701	0	26.6	3	0.6	0	1	0	-Inf	TRUE	FALSE
"1"	104133847	104134508	"+"	"ENSRNOG00000014277_016i"	"ENSRNOG00000014277"	"Zdhhc13"	661	9	2	6	18	14	7	0	0	0	1	1	0	46	19	36	14	12	7	0	5	0	0	42	0	1	0	0	2	3	0	0	0	0	0	0	0	2	0	2	0	1	0	0	0	0	0	0	0	0	0	NA	NA	9.8	1.6	0.0148260211800303	0.00242057488653555	25.4	2.4	1.2	0	1	0	-1.81237875643079	TRUE	FALSE
"1"	104134603	104135969	"+"	"ENSRNOG00000014277_017i"	"ENSRNOG00000014277"	"Zdhhc13"	1366	7	19	19	36	32	0	0	0	0	0	0	0	6	14	4	37	40	12	0	1	23	2	25	0	1	1	0	0	0	0	0	0	0	0	0	0	0	0	3	4	6	0	0	0	0	0	0	0	0	0	NA	NA	22.6	0	0.0165446559297218	0	20.2	7.6	0.4	0	2.6	0	-Inf	TRUE	FALSE
"1"	104136054	104139844	"+"	"ENSRNOG00000014277_018i"	"ENSRNOG00000014277"	"Zdhhc13"	3790	88	106	97	189	200	0	5	0	2	7	31	0	54	35	44	242	259	3	5	6	43	50	43	1	8	7	4	4	2	0	0	0	0	0	0	0	8	2	2	10	7	0	0	0	0	1	0	0	0	0	NA	NA	136	2.8	0.0358839050131926	0.000738786279683377	126.8	21.4	5	0	5.8	0.2	-3.88303546855489	TRUE	FALSE
"1"	104140003	104142048	"+"	"ENSRNOG00000014277_019i"	"ENSRNOG00000014277"	"Zdhhc13"	2045	23	28	34	75	78	0	0	0	0	2	17	0	35	69	96	12	21	4	13	9	0	6	100	1	5	11	5	1	9	0	0	0	0	0	0	0	3	0	3	4	0	0	0	0	0	0	0	0	0	0	NA	NA	47.6	0.4	0.0232762836185819	0.00019559902200489	46.6	6.4	6.2	0	2	0	-4.77912349311153	TRUE	FALSE
"1"	104142147	104144478	"+"	"ENSRNOG00000014277_020i"	"ENSRNOG00000014277"	"Zdhhc13"	2331	26	25	28	19	20	0	0	0	0	4	6	0	34	10	31	23	19	14	6	5	0	4	63	4	0	0	0	2	0	0	0	0	0	0	0	0	1	0	1	0	0	0	0	0	0	0	0	0	0	0	NA	NA	23.6	0.8	0.0101244101244101	0.000343200343200343	23.4	5.8	0.4	0	0.4	0	-3.38439026334577	TRUE	FALSE
"1"	104147506	104149378	"-"	"ENSRNOG00000014327_001i"	"ENSRNOG00000014327"	"Csrp3"	1872	0	0	0	2	0	0	0	0	0	0	0	0	0	0	0	0	0	0	0	0	0	0	0	0	0	0	0	0	0	0	0	0	0	0	0	0	0	0	0	0	0	0	0	0	0	0	0	0	0	0	NA	NA	0.4	0	0.000213675213675214	0	0	0	0	0	0	0	-Inf	FALSE	FALSE
"1"	104149473	104149704	"-"	"ENSRNOG00000014327_002i"	"ENSRNOG00000014327"	"Csrp3"	231	0	0	0	0	0	0	0	0	0	0	0	0	0	0	0	0	0	0	0	0	0	0	0	0	0	0	0	0	0	0	0	0	0	0	0	0	0	0	0	0	0	0	0	0	0	0	0	0	0	0	NA	NA	0	0	0	0	0	0	0	0	0	0	NA	FALSE	FALSE
"1"	104150057	104151246	"-"	"ENSRNOG00000014327_003i"	"ENSRNOG00000014327"	"Csrp3"	1189	0	0	0	0	0	0	0	0	0	0	0	0	0	0	0	0	0	0	0	0	0	0	0	0	0	0	0	0	0	0	0	0	0	0	0	0	0	0	0	0	0	0	0	0	0	0	0	0	0	0	NA	NA	0	0	0	0	0	0	0	0	0	0	NA	FALSE	FALSE
"1"	104151380	104152924	"-"	"ENSRNOG00000014327_004i"	"ENSRNOG00000014327"	"Csrp3"	1544	0	0	0	0	0	0	0	1	0	0	0	0	0	1	0	2	0	0	0	0	0	0	0	0	0	0	0	0	0	0	0	0	0	0	0	0	0	0	0	0	0	0	0	0	0	0	0	0	0	0	NA	NA	0	0.2	0	0.000129533678756477	0.6	0	0	0	0	0	Inf	FALSE	FALSE
"1"	104153094	104157714	"-"	"ENSRNOG00000014327_005i"	"ENSRNOG00000014327"	"Csrp3"	4620	0	0	0	0	0	0	0	0	0	1	1	0	0	0	0	0	0	0	0	0	0	0	0	0	0	0	0	0	0	0	0	0	0	0	0	0	0	0	0	0	0	0	0	0	0	0	0	0	0	0	NA	NA	0	0.2	0	4.32900432900433e-05	0	0	0	0	0	0	Inf	FALSE	FALSE
"1"	104157856	104166273	"-"	"ENSRNOG00000014327_007i"	"ENSRNOG00000014327"	"Csrp3"	8417	0	0	0	0	0	0	0	0	0	9	0	0	0	0	0	0	0	0	0	0	0	0	0	0	0	0	0	0	0	0	0	0	0	0	0	0	0	0	0	0	0	0	0	0	0	0	0	0	0	0	NA	NA	0	1.8	0	0.00021385291671617	0	0	0	0	0	0	Inf	FALSE	FALSE
"1"	104187283	104187716	"-"	"ENSRNOG00000022537_001i"	"ENSRNOG00000022537"	"E2f8"	433	0	0	0	0	0	0	0	0	0	0	0	0	0	0	0	0	0	0	0	0	0	0	0	0	0	0	0	0	0	0	0	0	0	0	0	0	0	0	0	0	0	0	0	0	0	0	0	0	0	0	NA	NA	0	0	0	0	0	0	0	0	0	0	NA	FALSE	FALSE
"1"	104188118	104188241	"-"	"ENSRNOG00000022537_002i"	"ENSRNOG00000022537"	"E2f8"	123	0	0	0	0	0	0	0	0	0	0	0	0	0	0	0	0	0	0	0	0	0	0	0	0	0	0	0	0	0	0	0	0	0	0	0	0	0	0	0	0	0	0	0	0	0	0	0	0	0	0	NA	NA	0	0	0	0	0	0	0	0	0	0	NA	FALSE	FALSE
"1"	104188375	104190832	"-"	"ENSRNOG00000022537_003i"	"ENSRNOG00000022537"	"E2f8"	2457	0	0	0	0	0	0	0	0	0	1	0	0	0	0	0	0	0	0	0	0	0	0	0	0	0	0	0	0	0	0	0	0	0	0	0	0	0	0	0	0	0	0	0	0	0	0	0	0	0	0	NA	NA	0	0.2	0	8.14000814000814e-05	0	0	0	0	0	0	Inf	FALSE	FALSE
"1"	104191377	104192015	"-"	"ENSRNOG00000022537_004i"	"ENSRNOG00000022537"	"E2f8"	638	0	0	0	0	0	0	0	0	0	0	0	0	0	0	0	0	0	0	0	0	0	0	0	0	0	0	0	0	0	0	0	0	0	0	0	0	0	0	0	0	0	0	0	0	0	0	0	0	0	0	NA	NA	0	0	0	0	0	0	0	0	0	0	NA	FALSE	FALSE
"1"	104192104	104192345	"-"	"ENSRNOG00000022537_005i"	"ENSRNOG00000022537"	"E2f8"	241	0	0	0	0	0	0	0	0	0	0	0	0	0	0	0	0	0	0	0	0	0	0	0	0	0	0	0	0	0	0	0	0	0	0	0	0	0	0	0	0	0	0	0	0	0	0	0	0	0	0	NA	NA	0	0	0	0	0	0	0	0	0	0	NA	FALSE	FALSE
"1"	104192547	104193522	"-"	"ENSRNOG00000022537_006i"	"ENSRNOG00000022537"	"E2f8"	975	0	0	0	0	0	0	0	0	0	0	0	0	0	0	0	0	0	0	0	0	0	0	0	0	0	0	0	0	0	0	0	0	0	0	0	0	0	0	0	0	0	0	0	0	0	0	0	0	0	0	NA	NA	0	0	0	0	0	0	0	0	0	0	NA	FALSE	FALSE
"1"	104193661	104195234	"-"	"ENSRNOG00000022537_007i"	"ENSRNOG00000022537"	"E2f8"	1573	0	0	0	0	0	0	0	0	0	0	0	0	0	0	0	0	0	0	0	0	0	0	0	0	0	0	0	0	0	0	0	0	0	0	0	0	0	0	0	0	0	0	0	0	0	0	0	0	0	0	NA	NA	0	0	0	0	0	0	0	0	0	0	NA	FALSE	FALSE
"1"	104195397	104196717	"-"	"ENSRNOG00000022537_008i"	"ENSRNOG00000022537"	"E2f8"	1320	0	0	0	0	0	0	0	0	0	0	2	0	0	0	0	0	0	0	0	0	0	0	0	0	0	0	0	0	0	0	0	0	0	0	0	0	0	0	0	0	0	0	0	0	0	0	0	0	0	0	NA	NA	0	0	0	0	0	0	0	0	0	0	NA	FALSE	FALSE
"1"	104197051	104200359	"-"	"ENSRNOG00000022537_009i"	"ENSRNOG00000022537"	"E2f8"	3308	0	0	0	0	1	0	0	0	0	6	0	0	0	0	0	0	0	0	0	0	0	0	0	0	0	0	0	0	0	0	0	0	0	0	0	0	0	0	0	0	0	0	0	0	0	0	0	0	0	0	NA	NA	0.2	1.2	6.0459492140266e-05	0.000362756952841596	0	0	0	0	0	0	1.79175946922805	FALSE	FALSE
"1"	104200514	104200684	"-"	"ENSRNOG00000022537_010i"	"ENSRNOG00000022537"	"E2f8"	170	0	0	0	0	0	0	0	0	0	0	0	0	0	0	0	0	0	0	0	0	0	0	0	0	0	0	0	0	0	0	0	0	0	0	0	0	0	0	0	0	0	0	0	0	0	0	0	0	0	0	NA	NA	0	0	0	0	0	0	0	0	0	0	NA	FALSE	FALSE
"1"	104200964	104202576	"-"	"ENSRNOG00000022537_011i"	"ENSRNOG00000022537"	"E2f8"	1612	0	1	0	0	1	0	0	0	0	0	0	0	0	0	0	0	0	0	0	0	0	0	0	0	0	0	0	0	1	0	0	0	0	0	0	0	0	0	0	0	0	0	0	0	0	0	0	0	0	0	NA	NA	0.4	0	0.000248138957816377	0	0	0	0.2	0	0	0	-Inf	FALSE	FALSE
"1"	104282274	104286857	"+"	"ENSRNOG00000058637_001i"	"ENSRNOG00000058637"	"AABR07003304.2"	4583	2	1	2	9	11	0	0	0	0	0	0	0	0	1	0	0	0	0	0	0	0	0	0	0	0	0	0	0	0	0	0	0	0	0	0	0	0	0	0	0	0	0	0	0	0	0	0	0	0	0	NA	NA	5	0	0.00109098843552258	0	0.2	0	0	0	0	0	-Inf	FALSE	FALSE
"1"	104287549	104351994	"+"	"ENSRNOG00000058637_004i"	"ENSRNOG00000058637"	"AABR07003304.2"	64445	188	261	158	547	719	17	2	6	16	35	28	0	0	6	2	0	0	0	0	0	0	0	0	0	0	0	0	0	0	0	0	0	0	0	0	0	4	0	0	2	0	0	2	0	0	0	0	0	0	0	NA	35	374.6	15.2	0.00581270851113353	0.000235860035689347	1.6	0	0	0	1.2	0.4	-3.20456336215776	TRUE	FALSE
"1"	104424035	104425108	"-"	"ENSRNOG00000053281_001i"	"ENSRNOG00000053281"	"AABR07003304.1"	1073	0	0	0	0	0	0	0	0	0	1	0	0	0	0	0	0	0	0	0	0	0	0	0	0	0	0	0	0	0	0	0	0	0	0	0	0	0	0	0	0	0	0	0	0	0	0	0	0	0	0	NA	NA	0	0.2	0	0.000186393289841566	0	0	0	0	0	0	Inf	FALSE	FALSE
"1"	104576847	104635988	"+"	"ENSRNOG00000014530_001i"	"ENSRNOG00000014530"	"Nav2"	59141	429	460	549	1352	1736	12	10	16	32	86	14	1	8	30	8	27	20	0	2	4	0	0	12	11	0	1	0	0	0	0	0	0	0	0	0	0	0	0	0	0	4	0	0	0	0	0	0	0	1	0	43	NA	905.2	31.2	0.0153057946264013	0.000527552797551614	18.6	1.2	0.2	0	0.8	0	-3.36773781894395	TRUE	FALSE
"1"	104636237	104696203	"+"	"ENSRNOG00000014530_002i"	"ENSRNOG00000014530"	"Nav2"	59966	278	371	373	838	1006	2	3	4	14	52	30	0	6	30	7	27	15	0	8	4	0	0	11	10	0	0	0	0	3	0	0	0	0	0	0	0	3	0	0	0	2	0	0	0	0	0	0	0	0	0	NA	NA	573.2	15	0.00955874995830971	0.000250141746989961	17	2.4	0.6	0	1	0	-3.64318449485181	TRUE	FALSE
"1"	104696322	104706545	"+"	"ENSRNOG00000014530_003i"	"ENSRNOG00000014530"	"Nav2"	10223	45	89	62	100	134	0	0	0	10	4	1	1	2	3	13	3	1	0	0	0	0	0	1	4	0	2	0	3	1	0	0	0	0	0	0	0	0	0	2	1	0	0	0	0	0	0	0	0	0	0	NA	NA	86	2.8	0.00841240340408882	0.000273892203854055	4.4	0	1.2	0	0.6	0	-3.42472787907235	TRUE	FALSE
"1"	104706599	104730613	"+"	"ENSRNOG00000014530_004i"	"ENSRNOG00000014530"	"Nav2"	24014	89	83	94	321	385	5	0	2	4	14	19	0	0	0	6	3	0	0	0	0	0	0	5	0	0	0	2	0	5	0	0	0	0	0	0	0	0	0	1	0	0	0	0	0	0	0	0	0	0	0	NA	22	194.4	5	0.00809527775464313	0.00020821187640543	1.8	0	1.4	0	0.2	0	-3.66047997959224	TRUE	FALSE
"1"	104730687	104740007	"+"	"ENSRNOG00000014530_005i"	"ENSRNOG00000014530"	"Nav2"	9320	53	82	66	217	236	0	0	7	4	2	21	0	6	7	4	53	42	6	0	4	30	29	7	0	0	1	5	0	5	0	0	0	0	0	0	0	0	3	2	1	1	0	0	0	0	0	0	0	0	0	NA	NA	130.8	2.6	0.0140343347639485	0.000278969957081545	22.4	13.8	2.2	0	1.4	0	-3.91815799399566	TRUE	FALSE
"1"	104740276	104744081	"+"	"ENSRNOG00000014530_006i"	"ENSRNOG00000014530"	"Nav2"	3805	70	91	87	184	169	2	8	0	10	6	12	2	1	4	0	4	0	5	6	1	0	19	11	8	0	0	0	4	1	0	0	0	0	0	0	0	1	4	3	3	3	0	0	0	0	0	0	0	0	0	NA	NA	120.2	5.2	0.0315900131406045	0.00136662286465177	1.8	6.2	1	0	2.8	0	-3.14049839651373	TRUE	FALSE
"1"	104744151	104750773	"+"	"ENSRNOG00000014530_007i"	"ENSRNOG00000014530"	"Nav2"	6622	112	117	82	234	280	0	0	0	16	12	4	0	5	6	6	11	5	5	4	2	0	47	10	7	5	8	11	25	15	0	0	0	0	0	0	0	1	2	0	0	1	0	0	0	0	0	0	0	0	0	NA	NA	165	5.6	0.0249169435215947	0.000845665961945032	6.6	11.6	12.8	0	0.8	0	-3.38317887615948	TRUE	FALSE
"1"	104750941	104785949	"+"	"ENSRNOG00000014530_008i"	"ENSRNOG00000014530"	"Nav2"	35008	79	138	147	407	479	12	3	0	12	18	19	0	5	11	14	29	17	0	3	0	16	7	1	0	0	0	3	0	1	0	0	0	0	0	0	0	0	0	0	3	1	0	0	0	1	0	0	0	0	0	NA	35	250	9	0.00714122486288848	0.000257084095063985	15.2	5.2	0.8	0	0.8	0.2	-3.32423634052603	TRUE	FALSE
"1"	104787043	104792187	"+"	"ENSRNOG00000014530_009i"	"ENSRNOG00000014530"	"Nav2"	5144	42	20	36	94	108	0	0	1	7	1	160	0	6	4	2	6	4	0	4	5	5	0	13	0	0	0	1	0	0	0	0	0	0	0	0	0	0	0	1	1	2	0	0	0	0	0	0	0	0	0	NA	NA	60	1.8	0.0116640746500778	0.000349922239502333	4.4	2.8	0.2	0	0.8	0	-3.50655789731998	TRUE	FALSE
"1"	104792301	104793270	"+"	"ENSRNOG00000014530_010i"	"ENSRNOG00000014530"	"Nav2"	969	5	0	1	11	14	0	0	0	0	1	1	0	3	4	1	0	5	0	12	12	5	9	2	1	3	0	0	0	0	0	0	0	0	0	0	0	0	0	0	3	0	0	0	0	0	0	0	0	0	0	NA	NA	6.2	0.2	0.00639834881320949	0.00020639834881321	2.6	7.6	0.6	0	0.6	0	-3.43398720448515	FALSE	FALSE
"1"	104793380	104795175	"+"	"ENSRNOG00000014530_011i"	"ENSRNOG00000014530"	"Nav2"	1795	4	6	8	21	29	0	0	0	0	4	0	0	9	4	2	10	10	4	3	2	7	12	6	5	0	0	0	2	0	0	0	0	0	0	0	0	0	0	0	2	0	0	0	0	0	0	0	0	0	0	NA	NA	13.6	0.8	0.00757660167130919	0.000445682451253482	7	5.6	0.4	0	0.4	0	-2.83321334405622	TRUE	FALSE
"1"	104795566	104821853	"+"	"ENSRNOG00000014530_012i"	"ENSRNOG00000014530"	"Nav2"	26287	67	87	59	286	372	0	0	8	11	16	39	0	12	3	8	2	3	17	15	7	0	0	10	4	0	3	0	1	0	0	0	0	0	0	0	0	0	0	0	1	0	0	0	0	0	0	0	0	0	0	NA	NA	174.2	7	0.00662684977365238	0.000266291322707042	5.6	7.8	0.8	0	0.2	0	-3.21429391536309	TRUE	FALSE
"1"	104821977	104871099	"+"	"ENSRNOG00000014530_013i"	"ENSRNOG00000014530"	"Nav2"	49122	71	101	97	456	580	0	0	2	5	31	33	7	5	14	10	14	15	0	12	0	0	2	5	5	0	1	0	0	0	0	0	0	0	0	0	0	0	3	0	1	1	0	0	0	0	0	0	0	0	0	NA	NA	261	7.6	0.00531330157566874	0.000154716827490737	11.6	2.8	0.2	0	1	0	-3.53637216003041	TRUE	FALSE
"1"	104871239	104879743	"+"	"ENSRNOG00000014530_014i"	"ENSRNOG00000014530"	"Nav2"	8504	55	58	65	157	187	0	0	1	3	12	2	1	2	0	1	1	4	0	0	0	0	0	4	3	0	0	0	0	2	0	0	0	0	2	0	0	0	0	0	0	2	0	0	0	0	0	0	0	0	0	NA	NA	104.4	3.2	0.0122765757290687	0.000376293508936971	1.6	0	0.4	0.4	0.4	0	-3.48507886564286	TRUE	FALSE
"1"	104880036	104881438	"+"	"ENSRNOG00000014530_015i"	"ENSRNOG00000014530"	"Nav2"	1402	5	13	2	45	48	3	0	0	0	0	0	0	4	2	5	2	0	1	0	1	10	0	19	2	0	0	0	0	0	0	0	0	0	0	0	0	0	0	0	0	1	0	0	0	0	0	0	0	0	0	NA	NA	22.6	0.6	0.0161198288159772	0.000427960057061341	2.6	2.4	0	0	0.2	0	-3.62877553004423	TRUE	FALSE
"1"	104882142	104885208	"+"	"ENSRNOG00000014530_016i"	"ENSRNOG00000014530"	"Nav2"	3066	9	18	20	57	80	6	0	0	0	7	2	0	12	28	7	14	25	3	2	8	15	7	16	1	0	0	3	0	0	0	0	0	0	0	0	0	2	1	0	4	11	0	0	0	0	0	0	0	0	0	NA	NA	36.8	2.6	0.0120026092628832	0.000848010437051533	17.2	7	0.6	0	3.6	0	-2.64998640014745	TRUE	FALSE
"1"	104885668	104886667	"+"	"ENSRNOG00000014530_017i"	"ENSRNOG00000014530"	"Nav2"	999	2	2	0	11	11	0	0	0	0	0	4	1	1	7	8	13	10	0	3	0	6	3	17	1	0	0	0	1	0	0	0	0	0	0	0	1	1	1	0	1	1	0	0	0	0	0	2	0	0	0	NA	NA	5.2	0	0.00520520520520521	0	7.8	2.4	0.2	0	0.8	0	-Inf	FALSE	FALSE
"1"	104886734	104888063	"+"	"ENSRNOG00000014530_018i"	"ENSRNOG00000014530"	"Nav2"	1329	16	18	9	62	54	0	2	0	0	3	9	0	0	5	6	8	5	0	3	2	5	3	11	2	2	0	0	0	0	0	0	0	0	0	0	0	3	1	3	7	1	0	0	0	0	0	0	0	0	0	NA	NA	31.8	1	0.0239277652370203	0.000752445447705041	4.8	2.6	0.4	0	3	0	-3.45946628978613	TRUE	FALSE
"1"	104888109	104890802	"+"	"ENSRNOG00000014530_019i"	"ENSRNOG00000014530"	"Nav2"	2693	38	40	72	132	125	0	3	0	6	1	50	0	3	7	4	2	1	0	4	0	3	2	18	4	2	1	3	2	0	0	0	0	0	0	1	0	4	2	8	12	13	0	0	0	0	0	0	0	0	0	NA	NA	81.4	2	0.0302265131823245	0.000742666171555886	3.4	1.8	1.6	0	7.8	0	-3.70622809244855	TRUE	FALSE
"1"	104890964	104892395	"+"	"ENSRNOG00000014530_020i"	"ENSRNOG00000014530"	"Nav2"	1431	37	37	42	33	31	0	12	0	0	1	10	0	11	26	12	17	10	6	10	4	2	5	19	1	3	18	2	2	2	0	0	0	0	0	0	0	9	2	10	4	1	0	0	0	0	0	0	0	0	0	NA	NA	36	2.6	0.0251572327044025	0.00181691125087352	15.2	5.4	5.4	0	5.2	0	-2.62800749342867	TRUE	FALSE
"1"	104892585	104897505	"+"	"ENSRNOG00000014530_021i"	"ENSRNOG00000014530"	"Nav2"	4920	34	110	43	111	107	5	5	0	1	4	1	0	13	13	4	21	16	1	11	0	2	17	22	0	0	4	0	2	0	0	0	0	0	0	0	0	0	2	1	3	3	0	0	0	0	0	0	0	0	0	NA	NA	81	3	0.0164634146341463	0.000609756097560976	13.4	6.2	1.2	0	1.8	0	-3.29583686600433	TRUE	FALSE
"1"	104897559	104898445	"+"	"ENSRNOG00000014530_022i"	"ENSRNOG00000014530"	"Nav2"	886	10	3	9	17	23	0	0	0	0	5	0	0	6	1	2	0	12	0	0	0	0	2	20	9	0	0	0	0	3	0	0	0	0	0	0	0	0	0	0	1	1	0	0	0	0	0	0	0	0	0	21	NA	12.4	1	0.0139954853273138	0.00112866817155756	4.2	0.4	0.6	0	0.4	0	-2.51769647261099	TRUE	FALSE
"1"	104898470	104898578	"+"	"ENSRNOG00000014530_023i"	"ENSRNOG00000014530"	"Nav2"	108	3	0	1	1	1	0	0	0	0	0	0	0	6	1	2	2	10	0	0	0	0	2	12	2	0	0	0	1	1	0	0	0	0	0	0	0	1	0	0	0	0	0	0	0	0	0	0	0	0	0	NA	NA	1.2	0	0.0111111111111111	0	4.2	0.4	0.4	0	0.2	0	-Inf	FALSE	FALSE
"1"	104898654	104903723	"+"	"ENSRNOG00000014530_024i"	"ENSRNOG00000014530"	"Nav2"	5069	21	41	50	86	101	0	0	0	0	2	21	0	4	1	1	4	4	0	0	0	0	0	6	1	4	0	3	5	0	0	0	0	0	0	0	0	0	4	1	2	3	0	0	0	0	0	0	0	0	0	NA	NA	59.8	0.4	0.0117971986585125	7.89110278161373e-05	2.8	0	2.4	0	2	0	-5.00729639283074	TRUE	FALSE
"1"	104903808	104904216	"+"	"ENSRNOG00000014530_025i"	"ENSRNOG00000014530"	"Nav2"	408	5	2	2	15	34	0	0	0	0	4	0	0	0	6	3	3	1	0	0	0	1	0	13	2	0	2	0	15	19	0	0	0	0	0	0	0	0	0	0	0	3	0	0	0	0	4	0	0	0	0	NA	NA	11.6	0.8	0.0284313725490196	0.00196078431372549	2.6	0.2	7.2	0	0.6	0.8	-2.67414864942653	TRUE	FALSE
"1"	104904329	104905668	"+"	"ENSRNOG00000014530_026i"	"ENSRNOG00000014530"	"Nav2"	1339	17	7	17	12	11	0	0	2	0	0	0	0	7	16	0	13	12	0	7	0	8	0	16	1	0	0	0	3	0	0	0	0	0	0	0	0	0	0	0	0	2	0	0	0	0	0	0	0	0	0	NA	NA	12.8	0.4	0.00955937266616878	0.000298730395817774	9.6	3	0.6	0	0.4	0	-3.46573590279973	TRUE	FALSE
"1"	104905815	104908966	"+"	"ENSRNOG00000014530_027i"	"ENSRNOG00000014530"	"Nav2"	3151	25	9	38	67	83	0	1	0	5	2	2	0	10	8	6	16	18	8	2	8	7	2	12	2	2	0	3	1	1	0	0	0	0	0	0	0	1	0	1	0	6	0	0	0	0	0	0	0	0	0	NA	NA	44.4	1.6	0.0140907648365598	0.000507775309425579	11.6	5.4	1.4	0	1.6	0	-3.32323584019244	TRUE	FALSE
"1"	104909140	104915946	"+"	"ENSRNOG00000014530_028i"	"ENSRNOG00000014530"	"Nav2"	6806	16	24	28	122	112	0	1	0	4	9	9	0	3	8	0	40	40	0	12	0	3	3	26	0	0	3	0	0	2	0	0	0	0	0	0	0	0	0	0	6	0	0	0	0	0	0	3	0	0	0	NA	NA	60.4	2.8	0.00887452248016456	0.00041140170437849	18.2	3.6	1	0	1.2	0	-3.07136968775961	TRUE	FALSE
"1"	104916101	104917120	"+"	"ENSRNOG00000014530_029i"	"ENSRNOG00000014530"	"Nav2"	1019	4	6	20	10	27	0	0	0	0	1	0	0	6	5	3	12	12	8	3	0	1	3	10	2	0	2	0	0	0	0	0	0	0	0	0	0	0	0	0	0	1	0	0	0	0	0	0	0	0	0	NA	NA	13.4	0.2	0.0131501472031403	0.000196270853778214	7.6	3	0.4	0	0.2	0	-4.20469261939097	TRUE	FALSE
"1"	104917284	104918159	"+"	"ENSRNOG00000014530_030i"	"ENSRNOG00000014530"	"Nav2"	875	4	9	3	42	53	0	0	0	2	1	24	0	3	3	1	10	3	0	2	0	0	0	3	2	0	0	0	0	0	0	0	0	0	0	0	0	0	3	0	0	0	0	0	0	0	0	0	0	0	0	NA	NA	22.2	0.6	0.0253714285714286	0.000685714285714286	4	0.4	0	0	0.6	0	-3.61091791264422	TRUE	FALSE
"1"	104918261	104920809	"+"	"ENSRNOG00000014530_031i"	"ENSRNOG00000014530"	"Nav2"	2548	13	15	35	50	55	0	0	2	0	1	50	0	4	3	2	0	1	0	0	0	0	0	7	2	1	0	1	1	0	0	0	1	0	0	0	0	0	0	0	0	0	0	0	0	0	0	0	0	0	0	NA	NA	33.6	0.6	0.0131868131868132	0.000235478806907378	2	0	0.6	0.2	0	0	-4.02535169073515	TRUE	FALSE
"1"	104920906	104922164	"+"	"ENSRNOG00000014530_032i"	"ENSRNOG00000014530"	"Nav2"	1258	5	11	2	24	17	5	0	0	1	0	0	0	8	3	0	0	6	0	4	0	0	0	19	0	0	0	0	0	4	0	0	0	0	0	0	0	0	0	0	1	0	0	0	0	0	0	0	0	0	0	NA	NA	11.8	1.2	0.00937996820349762	0.00095389507154213	3.4	0.8	0.8	0	0.2	0	-2.28577797467766	TRUE	FALSE
"1"	104922334	104927053	"+"	"ENSRNOG00000014530_033i"	"ENSRNOG00000014530"	"Nav2"	4719	7	17	5	68	65	0	0	0	1	9	22	2	2	6	5	5	7	4	4	0	6	1	29	3	0	0	0	0	0	0	0	0	0	0	0	0	0	0	0	0	0	0	0	0	0	0	1	1	0	0	NA	NA	32.4	2	0.00686586141131596	0.000423818605636787	5	3	0	0	0	0	-2.78501124223834	TRUE	FALSE
"1"	104927290	104928470	"+"	"ENSRNOG00000014530_034i"	"ENSRNOG00000014530"	"Nav2"	1180	4	12	5	12	19	0	0	0	1	0	1	0	4	3	0	4	6	0	0	0	0	2	29	7	0	0	1	0	0	0	0	0	0	0	0	0	0	1	1	0	0	0	0	0	0	0	0	0	0	0	NA	NA	10.4	0.2	0.0088135593220339	0.000169491525423729	3.4	0.4	0.2	0	0.4	0	-3.95124371858143	TRUE	FALSE
"1"	104928626	104928825	"+"	"ENSRNOG00000014530_035i"	"ENSRNOG00000014530"	"Nav2"	199	0	0	0	0	0	0	0	0	0	0	0	0	13	21	9	21	24	26	16	8	11	10	42	0	0	0	0	0	0	0	0	0	0	0	0	0	0	0	0	0	0	0	0	0	0	0	0	0	0	0	NA	NA	0	0	0	0	17.6	14.2	0	0	0	0	NA	FALSE	FALSE
"1"	104928898	104929594	"+"	"ENSRNOG00000014530_036i"	"ENSRNOG00000014530"	"Nav2"	696	4	10	3	13	23	0	0	0	0	1	1	0	2	0	1	1	4	0	0	0	0	0	36	0	0	7	1	0	2	0	0	0	0	0	0	0	0	0	0	2	0	0	0	0	0	0	0	0	0	0	NA	NA	10.6	0.2	0.0152298850574713	0.00028735632183908	1.6	0	2	0	0.4	0	-3.97029191355212	TRUE	FALSE
"1"	104929792	104930066	"+"	"ENSRNOG00000014530_037i"	"ENSRNOG00000014530"	"Nav2"	274	3	0	2	4	19	0	0	1	0	0	1	0	12	11	14	7	18	5	0	0	2	0	29	2	0	0	0	0	1	0	0	0	0	0	0	0	1	0	0	0	3	0	0	0	0	0	1	0	0	0	NA	NA	5.6	0.2	0.0204379562043796	0.00072992700729927	12.4	1.4	0.2	0	0.8	0	-3.3322045101752	FALSE	FALSE
"1"	104930186	104935512	"+"	"ENSRNOG00000014530_038i"	"ENSRNOG00000014530"	"Nav2"	5326	21	53	31	42	55	0	0	4	1	0	6	0	1	2	6	5	4	0	6	0	6	3	26	0	0	0	0	0	0	0	0	0	0	0	0	0	0	1	0	0	1	0	0	0	0	0	0	0	0	0	NA	NA	40.4	1	0.00758542996620353	0.000187758167480285	3.6	3	0	0	0.4	0	-3.6988297849671	TRUE	FALSE
"1"	104935717	104938239	"+"	"ENSRNOG00000014530_039i"	"ENSRNOG00000014530"	"Nav2"	2522	4	17	1	8	16	0	0	0	0	1	1	0	12	13	9	39	34	0	0	1	2	15	27	5	0	0	0	0	0	0	0	0	0	0	0	0	0	0	0	0	0	0	0	0	0	0	0	0	0	0	NA	NA	9.2	0.2	0.00364789849325932	7.93021411578113e-05	21.4	3.6	0	0	0	0	-3.8286413964891	FALSE	FALSE
"1"	104969554	104970254	"-"	"ENSRNOG00000014706_001i"	"ENSRNOG00000014706"	"Dbx1"	700	0	0	0	0	0	0	0	0	0	1	0	0	0	0	0	0	0	0	0	0	0	0	0	0	0	0	0	0	0	0	0	0	0	0	0	0	0	0	0	0	0	0	0	0	0	0	0	0	0	0	NA	NA	0	0.2	0	0.000285714285714286	0	0	0	0	0	0	Inf	FALSE	FALSE
"1"	104970458	104972372	"-"	"ENSRNOG00000014706_002i"	"ENSRNOG00000014706"	"Dbx1"	1914	0	0	0	0	0	0	0	0	0	0	0	0	0	0	0	0	0	0	0	0	0	0	0	0	0	0	0	0	0	0	0	0	0	0	0	0	0	0	0	0	0	0	0	0	0	0	0	0	0	0	NA	NA	0	0	0	0	0	0	0	0	0	0	NA	FALSE	FALSE
"1"	104972475	104973281	"-"	"ENSRNOG00000014706_003i"	"ENSRNOG00000014706"	"Dbx1"	806	0	0	0	0	0	0	0	0	0	0	0	0	0	0	0	0	0	0	0	0	0	0	0	0	0	0	0	0	0	0	0	0	0	0	0	0	0	0	0	0	0	0	0	0	0	0	0	0	0	0	NA	NA	0	0	0	0	0	0	0	0	0	0	NA	FALSE	FALSE
"1"	105035822	105039424	"+"	"ENSRNOG00000056203_001i"	"ENSRNOG00000056203"	"AABR07003310.2"	3602	0	0	0	0	0	0	0	0	0	0	0	0	0	0	0	0	0	0	0	0	0	0	0	0	0	0	0	0	0	0	0	0	0	0	0	0	0	0	0	0	0	0	0	0	0	0	0	0	0	0	NA	NA	0	0	0	0	0	0	0	0	0	0	NA	FALSE	FALSE
"1"	105036297	105036966	"+"	"ENSRNOG00000052766_001i"	"ENSRNOG00000052766"	"AABR07003310.1"	669	0	0	0	0	0	0	0	0	0	0	0	0	0	0	0	0	0	0	0	0	0	0	0	0	0	0	0	0	0	0	0	0	0	0	0	0	0	0	0	0	0	0	0	0	0	0	0	0	0	0	NA	NA	0	0	0	0	0	0	0	0	0	0	NA	FALSE	FALSE
"1"	105039522	105040915	"+"	"ENSRNOG00000056203_002i"	"ENSRNOG00000056203"	"AABR07003310.2"	1393	0	0	0	0	0	0	0	0	0	1	0	0	0	0	0	0	0	0	0	0	0	0	0	0	0	0	0	0	0	0	0	0	0	0	0	0	0	0	0	0	0	0	0	0	0	1	0	0	0	0	NA	NA	0	0.2	0	0.000143575017946877	0	0	0	0	0	0.2	Inf	FALSE	FALSE
"1"	105045472	105046151	"+"	"ENSRNOG00000056597_001i"	"ENSRNOG00000056597"	"AABR07003310.3"	679	0	0	0	0	0	0	0	0	0	0	0	0	0	0	0	0	0	0	0	0	0	0	0	0	0	0	0	0	0	0	0	0	0	0	0	0	0	0	0	0	0	0	0	0	0	0	0	0	0	0	NA	NA	0	0	0	0	0	0	0	0	0	0	NA	FALSE	FALSE
"1"	105094565	105094851	"+"	"ENSRNOG00000022189_001i"	"ENSRNOG00000022189"	"Htatip2"	286	3	0	0	0	0	0	0	0	0	0	0	1	1	0	0	0	0	0	0	0	0	0	0	0	0	0	0	0	0	0	0	0	0	0	0	1	0	0	0	0	0	0	0	0	0	0	0	0	0	0	NA	NA	0.6	0	0.0020979020979021	0	0.2	0	0	0	0	0	-Inf	FALSE	FALSE
"1"	105095048	105097598	"+"	"ENSRNOG00000022189_002i"	"ENSRNOG00000022189"	"Htatip2"	2550	0	0	0	0	1	0	0	0	0	0	3	0	0	2	0	0	0	4	7	0	0	0	0	0	0	0	0	0	1	0	0	0	0	0	0	0	0	0	0	0	0	0	0	0	0	0	0	0	0	0	NA	NA	0.2	0	7.84313725490196e-05	0	0.4	2.2	0.2	0	0	0	-Inf	FALSE	FALSE
"1"	105097707	105106175	"+"	"ENSRNOG00000022189_003i"	"ENSRNOG00000022189"	"Htatip2"	8468	0	0	0	0	0	0	0	0	0	0	2	0	0	1	0	0	0	0	0	0	0	0	0	0	0	0	0	0	0	0	0	0	0	0	0	0	0	0	0	0	0	0	0	0	0	0	0	0	0	0	NA	NA	0	0	0	0	0.2	0	0	0	0	0	NA	FALSE	FALSE
"1"	105106314	105107946	"+"	"ENSRNOG00000022189_004i"	"ENSRNOG00000022189"	"Htatip2"	1632	0	3	1	0	0	0	0	0	0	0	0	0	0	0	0	0	0	3	5	0	0	0	0	0	0	0	0	0	0	0	0	0	0	0	0	0	0	0	0	0	0	0	0	0	0	0	0	0	0	0	NA	NA	0.8	0	0.000490196078431373	0	0	1.6	0	0	0	0	-Inf	FALSE	FALSE
"1"	105108009	105108735	"+"	"ENSRNOG00000022189_005i"	"ENSRNOG00000022189"	"Htatip2"	726	0	4	0	0	1	0	0	0	0	0	0	0	0	0	0	0	0	0	0	0	0	0	0	0	0	0	0	0	0	0	0	0	0	0	0	0	0	0	0	0	0	0	0	0	0	0	0	0	0	0	NA	NA	1	0	0.00137741046831956	0	0	0	0	0	0	0	-Inf	FALSE	FALSE
"1"	105113909	105115543	"+"	"ENSRNOG00000014829_004i"	"ENSRNOG00000014829"	"Prmt3"	1634	1	13	7	12	10	0	0	0	0	0	0	0	9	4	2	4	10	6	4	0	0	0	5	0	0	0	0	0	0	0	0	0	0	0	0	0	0	0	0	0	0	0	0	0	0	0	0	0	0	0	NA	NA	8.6	0	0.00526315789473684	0	5.8	2	0	0	0	0	-Inf	TRUE	FALSE
"1"	105115627	105116346	"+"	"ENSRNOG00000014829_005i"	"ENSRNOG00000014829"	"Prmt3"	719	7	8	11	17	8	0	0	0	0	0	0	0	2	0	0	1	2	3	6	0	0	0	17	2	2	1	0	1	1	0	0	0	0	0	0	0	2	7	4	0	1	0	0	0	0	0	0	0	0	0	NA	NA	10.2	0	0.0141863699582754	0	1	1.8	1	0	2.8	0	-Inf	TRUE	FALSE
"1"	105116397	105117596	"+"	"ENSRNOG00000014829_006i"	"ENSRNOG00000014829"	"Prmt3"	1199	0	0	5	0	4	0	0	0	0	0	0	0	1	5	7	6	0	3	0	0	0	0	16	0	0	0	0	0	0	0	0	0	0	0	0	0	0	0	1	0	0	0	0	0	0	0	0	0	0	0	NA	NA	1.8	0	0.00150125104253545	0	3.8	0.6	0	0	0.2	0	-Inf	FALSE	FALSE
"1"	105117700	105121684	"+"	"ENSRNOG00000014829_007i"	"ENSRNOG00000014829"	"Prmt3"	3984	13	27	11	35	21	1	0	0	0	0	0	0	20	27	22	16	5	15	2	8	12	0	16	0	0	0	0	0	3	0	0	0	0	0	0	0	0	1	0	2	0	0	0	0	0	0	0	0	0	0	NA	NA	21.4	0.2	0.0053714859437751	5.02008032128514e-05	18	7.4	0.6	0	0.6	0	-4.67282883446191	TRUE	FALSE
"1"	105121845	105122929	"+"	"ENSRNOG00000014829_008i"	"ENSRNOG00000014829"	"Prmt3"	1084	4	6	3	2	3	0	0	0	0	0	0	0	23	25	28	18	18	0	2	13	3	12	10	0	0	0	0	0	0	0	0	0	0	0	0	0	0	2	1	0	0	0	0	0	0	0	0	0	0	0	NA	NA	3.6	0	0.0033210332103321	0	22.4	6	0	0	0.6	0	-Inf	FALSE	FALSE
"1"	105123072	105125990	"+"	"ENSRNOG00000014829_009i"	"ENSRNOG00000014829"	"Prmt3"	2918	15	7	4	24	20	0	0	0	6	9	2	0	9	2	12	5	0	1	0	5	13	1	14	1	0	0	0	0	0	0	0	0	0	0	0	0	0	0	0	2	0	0	0	0	0	0	2	0	0	0	NA	NA	14	3	0.0047978067169294	0.00102810143934202	5.6	4	0	0	0.4	0	-1.54044504094715	FALSE	FALSE
"1"	105126057	105134108	"+"	"ENSRNOG00000014829_010i"	"ENSRNOG00000014829"	"Prmt3"	8051	5	5	4	27	37	0	0	0	0	3	3	0	12	7	5	12	0	1	0	3	5	0	22	1	0	0	1	0	1	0	0	0	0	0	0	0	0	0	0	0	0	0	0	0	0	0	0	0	0	0	NA	NA	15.6	0.6	0.00193764749720532	7.4524903738666e-05	7.2	1.8	0.4	0	0	0	-3.25809653802148	FALSE	FALSE
"1"	105134231	105142133	"+"	"ENSRNOG00000014829_011i"	"ENSRNOG00000014829"	"Prmt3"	7902	2	11	3	58	41	0	0	0	0	0	1	0	14	5	3	0	1	7	0	0	2	0	0	0	0	0	0	0	0	0	0	0	0	0	0	0	0	0	0	0	0	0	0	0	0	0	0	0	0	0	NA	NA	23	0	0.00291065553024551	0	4.6	1.8	0	0	0	0	-Inf	FALSE	FALSE
"1"	105142234	105154148	"+"	"ENSRNOG00000014829_012i"	"ENSRNOG00000014829"	"Prmt3"	11914	15	19	17	74	60	0	0	0	0	2	3	0	2	3	17	6	4	0	0	0	0	7	13	2	0	0	0	0	1	0	0	0	0	0	0	0	5	0	0	0	0	0	0	0	0	0	0	0	0	0	NA	NA	37	0.4	0.0031055900621118	3.35739466174249e-05	6.4	1.4	0.2	0	1	0	-4.52720864451838	FALSE	FALSE
"1"	105154228	105162658	"+"	"ENSRNOG00000014829_013i"	"ENSRNOG00000014829"	"Prmt3"	8430	31	31	24	59	42	0	0	0	1	10	0	0	4	18	12	12	8	12	16	2	0	16	31	0	0	0	0	0	0	0	0	0	0	0	0	0	0	0	2	0	0	0	0	0	0	0	0	0	0	0	NA	NA	37.4	2.2	0.00443653618030842	0.000260972716488731	10.8	9.2	0	0	0.4	0	-2.83321334405622	FALSE	FALSE
"1"	105162847	105164809	"+"	"ENSRNOG00000014829_014i"	"ENSRNOG00000014829"	"Prmt3"	1962	12	25	5	33	21	0	0	0	0	0	8	0	24	8	4	11	4	5	0	5	0	0	28	0	0	0	0	0	0	0	0	0	0	0	0	0	0	1	0	0	1	0	0	0	0	0	0	0	0	0	NA	NA	19.2	0	0.00978593272171254	0	10.2	2	0	0	0.4	0	-Inf	TRUE	FALSE
"1"	105164897	105188586	"+"	"ENSRNOG00000014829_015i"	"ENSRNOG00000014829"	"Prmt3"	23689	58	43	51	131	96	1	0	0	1	6	10	1	40	65	27	30	17	49	30	17	19	19	19	2	0	0	0	0	0	0	0	0	0	0	0	0	1	0	0	0	0	0	0	0	0	0	0	0	0	0	NA	NA	75.8	1.6	0.00319979737430875	6.75418970830343e-05	35.8	26.8	0	0	0.2	0	-3.85809466340259	FALSE	FALSE
"1"	105188638	105188828	"+"	"ENSRNOG00000014829_016i"	"ENSRNOG00000014829"	"Prmt3"	190	0	0	0	4	0	0	0	0	0	0	0	0	7	18	5	9	7	8	0	1	6	0	31	3	0	0	0	0	0	0	0	0	0	0	0	0	0	0	0	0	0	0	0	0	0	0	0	0	0	0	NA	NA	0.8	0	0.00421052631578947	0	9.2	3	0	0	0	0	-Inf	FALSE	FALSE
"1"	105188917	105199358	"+"	"ENSRNOG00000014829_017i"	"ENSRNOG00000014829"	"Prmt3"	10441	3	5	8	17	13	0	0	0	0	1	26	0	4	12	3	3	7	18	0	0	0	2	19	0	0	1	0	0	0	0	0	0	0	0	0	0	0	0	0	0	0	0	0	0	0	0	0	0	0	0	NA	NA	9.2	0.2	0.000881141653098362	1.91552533282253e-05	5.8	4	0.2	0	0	0	-3.8286413964891	FALSE	FALSE
"1"	105285018	105285418	"+"	"ENSRNOG00000031662_001i"	"ENSRNOG00000031662"	"Slc6a5"	400	0	0	0	0	0	0	0	0	0	0	0	0	0	0	0	0	0	0	0	0	0	0	0	0	0	0	0	0	0	0	0	0	0	0	0	0	0	0	0	0	0	0	0	0	0	0	0	0	0	0	NA	NA	0	0	0	0	0	0	0	0	0	0	NA	FALSE	FALSE
"1"	105285576	105286328	"+"	"ENSRNOG00000031662_002i"	"ENSRNOG00000031662"	"Slc6a5"	752	0	0	0	0	0	0	0	0	0	0	0	0	0	0	0	0	0	0	0	0	0	0	0	0	0	0	0	0	0	0	0	0	0	0	0	0	0	0	0	0	0	0	0	0	0	0	0	0	0	0	NA	NA	0	0	0	0	0	0	0	0	0	0	NA	FALSE	FALSE
"1"	105286872	105289235	"+"	"ENSRNOG00000031662_003i"	"ENSRNOG00000031662"	"Slc6a5"	2363	0	0	0	0	1	0	0	0	0	0	0	0	0	0	0	0	0	0	0	0	0	0	0	0	0	0	0	0	0	0	0	0	0	0	0	0	0	0	0	0	0	0	0	0	0	0	0	0	0	0	NA	NA	0.2	0	8.46381718154888e-05	0	0	0	0	0	0	0	-Inf	FALSE	FALSE
"1"	105289375	105291760	"+"	"ENSRNOG00000031662_004i"	"ENSRNOG00000031662"	"Slc6a5"	2385	0	0	0	0	0	0	0	0	0	0	0	0	0	0	0	0	0	0	0	0	0	0	0	0	0	0	0	0	0	0	0	0	0	0	0	0	0	0	0	0	0	0	0	0	0	0	0	0	0	0	NA	NA	0	0	0	0	0	0	0	0	0	0	NA	FALSE	FALSE
"1"	105291893	105292133	"+"	"ENSRNOG00000031662_005i"	"ENSRNOG00000031662"	"Slc6a5"	240	0	0	0	0	0	0	0	0	0	0	0	0	0	0	0	0	0	0	0	0	0	0	0	0	0	0	0	0	0	0	0	0	0	0	0	0	0	0	0	0	0	0	0	0	0	0	0	0	0	0	NA	NA	0	0	0	0	0	0	0	0	0	0	NA	FALSE	FALSE
"1"	105292308	105301994	"+"	"ENSRNOG00000031662_006i"	"ENSRNOG00000031662"	"Slc6a5"	9686	0	0	0	0	0	0	0	0	0	0	1	0	0	0	0	0	0	0	0	0	0	0	0	0	0	0	0	0	0	0	0	0	0	0	0	0	0	0	0	0	0	0	0	0	0	0	0	0	0	0	NA	NA	0	0	0	0	0	0	0	0	0	0	NA	FALSE	FALSE
"1"	105302137	105304388	"+"	"ENSRNOG00000031662_007i"	"ENSRNOG00000031662"	"Slc6a5"	2251	0	0	0	0	0	0	0	0	0	0	0	0	0	0	0	0	0	0	0	0	0	0	0	0	0	0	0	0	0	0	0	0	0	0	0	0	0	0	0	0	0	0	0	0	0	0	0	0	0	0	NA	NA	0	0	0	0	0	0	0	0	0	0	NA	FALSE	FALSE
"1"	105304522	105309607	"+"	"ENSRNOG00000031662_008i"	"ENSRNOG00000031662"	"Slc6a5"	5085	0	0	0	0	0	0	0	5	0	0	1	0	0	0	0	0	0	0	0	0	0	0	0	0	0	0	0	0	0	0	0	0	0	0	0	0	0	0	0	0	0	0	0	0	0	0	0	0	0	0	NA	NA	0	1	0	0.000196656833824975	0	0	0	0	0	0	Inf	FALSE	FALSE
"1"	105309743	105311299	"+"	"ENSRNOG00000031662_009i"	"ENSRNOG00000031662"	"Slc6a5"	1556	0	0	0	0	0	0	0	0	0	0	0	0	0	0	0	0	0	0	0	0	0	0	0	0	0	0	0	0	0	0	0	0	0	0	0	0	0	0	0	0	0	0	0	0	0	0	0	0	0	0	NA	NA	0	0	0	0	0	0	0	0	0	0	NA	FALSE	FALSE
"1"	105311404	105314757	"+"	"ENSRNOG00000031662_010i"	"ENSRNOG00000031662"	"Slc6a5"	3353	0	0	0	0	0	0	0	0	0	0	0	0	0	0	0	0	0	0	0	0	0	0	0	0	0	0	0	0	0	0	0	0	0	0	0	0	0	0	0	0	0	0	0	0	0	0	0	0	0	0	NA	NA	0	0	0	0	0	0	0	0	0	0	NA	FALSE	FALSE
"1"	105314883	105318795	"+"	"ENSRNOG00000031662_011i"	"ENSRNOG00000031662"	"Slc6a5"	3912	0	0	0	0	0	0	0	0	0	3	1	0	0	0	0	1	0	0	0	0	0	0	0	0	0	0	0	0	0	0	0	0	0	0	0	0	0	0	0	0	0	0	0	0	0	0	0	0	0	0	NA	NA	0	0.6	0	0.000153374233128834	0.2	0	0	0	0	0	Inf	FALSE	FALSE
"1"	105318909	105319805	"+"	"ENSRNOG00000031662_012i"	"ENSRNOG00000031662"	"Slc6a5"	896	0	0	0	0	0	0	0	0	0	0	0	0	0	0	0	0	0	0	0	0	0	0	0	0	0	0	0	0	0	0	0	0	0	0	0	0	0	0	0	0	0	0	0	0	0	0	0	0	0	0	NA	NA	0	0	0	0	0	0	0	0	0	0	NA	FALSE	FALSE
"1"	105319938	105321458	"+"	"ENSRNOG00000031662_013i"	"ENSRNOG00000031662"	"Slc6a5"	1520	0	0	0	0	0	0	0	0	0	0	0	0	0	0	0	0	0	0	0	0	0	0	0	0	0	0	0	0	0	0	0	0	0	0	0	0	0	0	0	0	0	0	0	0	0	0	0	0	0	0	NA	NA	0	0	0	0	0	0	0	0	0	0	NA	FALSE	FALSE
"1"	105321559	105324513	"+"	"ENSRNOG00000031662_014i"	"ENSRNOG00000031662"	"Slc6a5"	2954	3	0	0	0	1	0	0	0	0	1	0	1	0	0	0	0	0	0	0	0	0	0	0	0	0	0	0	0	0	0	0	0	0	0	0	0	3	0	0	0	1	0	0	0	0	0	0	1	0	0	NA	NA	0.8	0.2	0.0002708192281652	6.77048070412999e-05	0	0	0	0	0.8	0	-1.38629436111989	FALSE	FALSE
"1"	105324615	105328972	"+"	"ENSRNOG00000031662_015i"	"ENSRNOG00000031662"	"Slc6a5"	4357	0	3	0	1	0	0	0	0	0	3	0	0	0	0	0	0	0	0	0	0	0	0	0	0	0	0	0	0	0	0	0	0	0	0	0	0	0	0	0	0	0	0	0	0	0	0	0	0	0	0	NA	NA	0.8	0.6	0.000183612577461556	0.000137709433096167	0	0	0	0	0	0	-0.287682072451781	FALSE	FALSE
"1"	105329141	105331810	"+"	"ENSRNOG00000031662_016i"	"ENSRNOG00000031662"	"Slc6a5"	2669	0	0	0	0	4	0	0	0	0	8	0	0	0	0	0	0	3	0	0	0	0	1	0	0	0	0	0	0	0	0	0	0	0	0	0	0	0	0	0	0	0	0	0	0	0	0	0	0	0	0	NA	NA	0.8	1.6	0.000299737729486699	0.000599475458973398	0.6	0.2	0	0	0	0	0.693147180559945	FALSE	FALSE
"1"	105349182	105357781	"+"	"ENSRNOG00000015675_001i"	"ENSRNOG00000015675"	"Nell1"	8599	13	5	22	26	46	0	0	4	0	15	0	0	6	5	12	6	6	4	0	0	0	3	52	9	0	0	0	0	0	0	0	0	0	0	0	0	0	3	0	3	0	0	0	0	0	0	0	0	0	0	NA	NA	22.4	3.8	0.0026049540644261	0.000441911850215141	7	1.4	0	0	1.2	0	-1.77405989212865	FALSE	FALSE
"1"	105357911	105437966	"+"	"ENSRNOG00000015675_002i"	"ENSRNOG00000015675"	"Nell1"	80055	104	128	168	372	471	3	0	7	12	22	9	1	19	31	12	5	3	0	4	11	0	1	31	2	0	5	2	4	0	0	0	0	0	0	0	0	0	0	0	0	0	0	0	0	0	0	0	0	0	0	NA	NA	248.6	8.8	0.0031053650615202	0.000109924426956467	14	3.2	2.2	0	0	0	-3.34109345759245	FALSE	FALSE
"1"	105438118	105492045	"+"	"ENSRNOG00000015675_003i"	"ENSRNOG00000015675"	"Nell1"	53927	66	36	33	154	206	0	3	0	7	30	6	3	36	35	51	8	26	8	5	4	3	4	8	1	0	0	0	0	0	0	0	0	0	0	0	0	0	0	2	0	0	0	0	0	0	0	0	0	0	0	21	35	99	8	0.00183581508335342	0.000148348693604317	31.2	4.8	0	0	0.4	0	-2.51567830845475	FALSE	FALSE
"1"	105492217	105530467	"+"	"ENSRNOG00000015675_004i"	"ENSRNOG00000015675"	"Nell1"	38250	86	72	77	137	164	0	0	3	8	28	1	0	25	28	29	9	18	0	2	5	4	5	33	2	3	0	0	1	2	0	0	0	0	0	0	0	0	0	0	0	0	0	0	0	0	0	0	0	0	0	NA	NA	107.2	7.8	0.00280261437908497	0.000203921568627451	21.8	3.2	1.2	0	0	0	-2.62057251494116	FALSE	FALSE
"1"	105530565	105577466	"+"	"ENSRNOG00000015675_005i"	"ENSRNOG00000015675"	"Nell1"	46901	53	67	71	203	207	0	0	0	0	7	15	0	42	44	67	22	36	10	5	15	6	3	20	1	0	0	0	1	4	0	0	0	0	0	0	0	0	0	0	0	0	0	0	0	0	0	0	0	0	0	NA	NA	120.2	1.4	0.00256284514189463	2.98501098057611e-05	42.2	7.8	1	0	0	0	-4.45268478547989	FALSE	FALSE
"1"	105577540	105578185	"+"	"ENSRNOG00000015675_006i"	"ENSRNOG00000015675"	"Nell1"	645	3	3	0	2	4	0	0	0	0	0	0	0	15	12	17	3	2	6	11	8	0	1	28	1	0	0	0	0	0	0	0	0	0	0	0	0	0	3	0	0	0	0	0	0	0	0	0	0	0	0	NA	NA	2.4	0	0.00372093023255814	0	9.8	5.2	0	0	0.6	0	-Inf	FALSE	FALSE
"1"	105578269	105587864	"+"	"ENSRNOG00000015675_007i"	"ENSRNOG00000015675"	"Nell1"	9595	12	10	15	60	63	0	0	0	0	3	2	0	16	12	8	21	6	0	0	0	0	0	33	6	0	3	0	1	0	0	0	0	0	0	0	0	0	0	0	0	0	0	0	0	0	0	0	0	0	0	NA	NA	32	0.6	0.00333507034914018	6.25325690463783e-05	12.6	0	0.8	0	0	0	-3.97656152656572	FALSE	FALSE
"1"	105588000	105589095	"+"	"ENSRNOG00000015675_008i"	"ENSRNOG00000015675"	"Nell1"	1095	2	4	10	2	9	0	0	0	0	0	0	0	40	34	62	36	47	13	13	3	12	5	26	1	0	0	0	0	0	0	0	0	0	0	0	0	0	0	4	0	0	0	0	0	0	0	0	0	0	0	NA	NA	5.4	0	0.00493150684931507	0	43.8	9.2	0	0	0.8	0	-Inf	FALSE	FALSE
"1"	105589199	105600775	"+"	"ENSRNOG00000015675_009i"	"ENSRNOG00000015675"	"Nell1"	11576	2	14	14	29	20	0	0	0	0	18	8	0	12	11	14	6	12	0	8	0	0	0	48	0	0	2	0	0	0	0	0	0	0	0	0	0	0	0	0	0	0	0	0	0	0	0	0	0	0	0	NA	NA	15.8	3.6	0.00136489288182446	0.000310988251554941	11	1.6	0.4	0	0	0	-1.47907609457086	FALSE	FALSE
"1"	105600850	105611601	"+"	"ENSRNOG00000015675_010i"	"ENSRNOG00000015675"	"Nell1"	10751	35	19	69	32	42	0	0	1	0	5	0	0	28	15	15	3	6	9	2	2	3	8	20	1	0	0	0	0	0	0	0	0	0	0	0	0	0	0	0	0	0	0	0	0	0	0	0	0	0	0	NA	NA	39.4	1.2	0.00366477536973305	0.00011161752395126	13.4	4.8	0	0	0	0	-3.49144425950993	FALSE	FALSE
"1"	105611702	105630665	"+"	"ENSRNOG00000015675_011i"	"ENSRNOG00000015675"	"Nell1"	18963	117	110	120	97	158	6	0	0	0	8	61	2	30	5	20	5	5	0	10	1	0	0	28	0	0	0	0	0	0	0	0	0	0	0	0	0	0	0	0	0	0	0	0	0	0	0	0	0	0	0	NA	NA	120.4	2.8	0.00634920634920635	0.00014765596160945	13	2.2	0	0	0	0	-3.76120011569356	TRUE	FALSE
"1"	105630795	105794089	"+"	"ENSRNOG00000015675_012i"	"ENSRNOG00000015675"	"Nell1"	163294	1201	1006	1299	2353	3078	6	11	8	45	106	36	1	19	21	11	9	16	2	1	0	0	3	34	0	0	3	12	2	1	0	0	0	0	0	0	0	0	0	0	0	0	0	0	0	0	0	0	0	0	0	43	NA	1787.4	35.2	0.0109459012578539	0.000215562114958296	15.2	1.2	3.6	0	0	0	-3.92747124634324	TRUE	FALSE
"1"	105794216	105900377	"+"	"ENSRNOG00000015675_013i"	"ENSRNOG00000015675"	"Nell1"	106161	445	438	482	1119	1241	4	8	9	20	71	43	0	16	24	22	3	8	0	11	0	0	1	39	0	6	7	1	3	2	0	0	0	0	0	0	0	0	0	0	0	0	0	0	0	1	0	0	0	0	0	NA	NA	745	22.4	0.00701764301391283	0.000211000273169997	14.6	2.4	3.8	0	0	0.2	-3.50432325951857	TRUE	FALSE
"1"	105900501	106023693	"+"	"ENSRNOG00000015675_014i"	"ENSRNOG00000015675"	"Nell1"	123192	434	381	480	651	816	4	0	0	8	37	11	1	1	5	12	2	8	0	0	6	0	0	46	2	0	1	0	0	0	0	0	0	0	0	0	0	0	0	0	0	0	0	0	0	0	0	0	0	0	0	14	NA	552.4	9.8	0.00448405740632509	7.95506201701409e-05	5.6	1.2	0.2	0	0	0	-4.03189003585861	FALSE	FALSE
"1"	106023790	106181346	"+"	"ENSRNOG00000015675_015i"	"ENSRNOG00000015675"	"Nell1"	157556	557	632	784	1345	1584	12	1	2	18	109	28	5	14	12	19	5	2	0	0	0	0	2	7	0	2	5	6	0	0	0	0	0	0	0	0	0	1	0	0	0	1	0	0	0	0	0	0	0	0	0	NA	NA	980.4	28.4	0.00622254944273782	0.000180253370230267	10.4	0.4	2.6	0	0.4	0	-3.5415715064868	TRUE	FALSE
"1"	106181488	106202257	"+"	"ENSRNOG00000015675_016i"	"ENSRNOG00000015675"	"Nell1"	20769	38	32	41	67	69	0	0	2	0	8	8	0	10	16	18	5	8	5	0	0	4	8	22	1	0	0	0	0	0	0	0	0	0	0	0	0	0	0	0	0	0	0	0	0	0	0	0	0	0	0	NA	NA	49.4	2	0.00237854494679571	9.62973662670326e-05	11.4	3.4	0	0	0	0	-3.20680324363393	FALSE	FALSE
"1"	106202452	106209210	"+"	"ENSRNOG00000015675_017i"	"ENSRNOG00000015675"	"Nell1"	6758	64	31	41	32	37	0	0	0	1	0	2	0	11	20	14	3	9	9	0	0	0	1	33	4	0	0	1	0	2	0	0	0	0	0	0	0	0	0	0	0	0	0	0	0	0	0	0	0	0	0	NA	NA	41	0.2	0.00606688369340041	2.95945546019532e-05	11.4	2	0.6	0	0	0	-5.32300997913841	TRUE	FALSE
"1"	106209388	106211360	"+"	"ENSRNOG00000015675_018i"	"ENSRNOG00000015675"	"Nell1"	1972	3	5	2	9	17	0	0	0	0	0	1	0	16	27	14	2	2	16	18	3	1	0	17	1	0	0	0	0	2	0	0	0	0	0	0	0	0	0	2	0	2	0	0	0	0	0	0	0	0	0	NA	NA	7.2	0	0.00365111561866126	0	12.2	7.6	0.4	0	0.8	0	-Inf	FALSE	FALSE
"1"	106211586	106218509	"+"	"ENSRNOG00000015675_019i"	"ENSRNOG00000015675"	"Nell1"	6923	11	6	5	26	39	0	0	0	0	3	0	0	9	5	24	6	3	8	2	3	0	0	25	0	0	0	0	0	0	0	0	0	0	0	0	0	0	0	0	0	0	0	0	0	0	0	0	0	0	0	NA	NA	17.4	0.6	0.00251336125956955	8.66676296403293e-05	9.4	2.6	0	0	0	0	-3.36729582998647	FALSE	FALSE
"1"	106861374	106862787	"-"	"ENSRNOG00000055821_001i"	"ENSRNOG00000055821"	"AABR07003349.1"	1413	6	0	0	3	0	0	0	0	0	1	0	0	0	0	4	0	0	0	0	0	0	0	0	0	0	0	0	0	0	0	0	0	0	0	0	0	0	0	0	0	0	0	0	0	0	0	0	0	0	0	NA	NA	1.8	0.2	0.00127388535031847	0.000141542816702052	0.8	0	0	0	0	0	-2.19722457733622	FALSE	FALSE
"1"	106896847	106900830	"+"	"ENSRNOG00000015972_001i"	"ENSRNOG00000015972"	"Ano5"	3983	11	16	6	8	10	0	0	0	1	0	0	0	1	7	1	0	0	0	0	0	0	0	0	0	0	0	0	0	0	0	0	0	0	0	0	0	0	0	0	0	0	0	0	0	0	0	0	0	0	0	NA	NA	10.2	0.2	0.00256088375596284	5.02134069796636e-05	1.8	0	0	0	0	0	-3.93182563272433	FALSE	FALSE
"1"	106900873	106902936	"+"	"ENSRNOG00000015972_002i"	"ENSRNOG00000015972"	"Ano5"	2063	5	10	3	2	0	0	0	0	0	0	0	0	0	6	0	0	0	0	0	0	0	0	0	0	0	0	0	0	0	0	0	0	0	0	0	0	2	0	0	0	0	0	0	0	0	0	0	0	0	0	NA	NA	4	0	0.00193892389723703	0	1.2	0	0	0	0.4	0	-Inf	FALSE	FALSE
"1"	106903051	106918649	"+"	"ENSRNOG00000015972_003i"	"ENSRNOG00000015972"	"Ano5"	15598	13	7	8	19	12	0	0	0	2	6	18	1	0	7	0	0	0	0	0	0	0	0	0	0	0	0	0	0	0	0	0	0	0	0	0	0	0	0	0	0	0	0	0	0	0	0	0	0	0	0	NA	NA	11.8	1.6	0.000756507244518528	0.000102577253494038	1.4	0	0	0	0	0	-1.99809590222588	FALSE	FALSE
"1"	106918719	106918946	"+"	"ENSRNOG00000015972_004i"	"ENSRNOG00000015972"	"Ano5"	227	0	0	0	0	0	0	0	0	0	0	0	0	1	0	0	0	0	0	0	0	0	0	0	0	0	0	0	0	0	0	0	0	0	0	0	0	0	0	0	0	0	0	0	0	0	0	0	0	0	0	NA	NA	0	0	0	0	0.2	0	0	0	0	0	NA	FALSE	FALSE
"1"	106919232	106925249	"+"	"ENSRNOG00000015972_005i"	"ENSRNOG00000015972"	"Ano5"	6017	14	16	5	6	6	11	0	0	0	2	2	0	19	10	9	0	0	0	0	0	0	0	0	0	0	0	0	0	0	5	0	0	0	0	0	0	0	1	0	0	0	0	0	0	0	0	0	0	0	0	NA	NA	9.4	2.6	0.0015622403190959	0.000432109024430779	7.6	0	0	1	0.2	0	-1.28519824424852	FALSE	FALSE
"1"	106925364	106928163	"+"	"ENSRNOG00000015972_006i"	"ENSRNOG00000015972"	"Ano5"	2799	2	13	7	3	4	0	0	0	2	3	0	0	0	2	0	0	0	0	0	0	0	0	0	0	1	0	0	0	2	0	0	0	0	0	0	0	0	2	0	0	0	0	0	0	0	0	0	0	0	0	NA	NA	5.8	1	0.00207216863165416	0.000357270453733476	0.4	0	0.6	0	0.4	0	-1.75785791755237	FALSE	FALSE
"1"	106928277	106937444	"+"	"ENSRNOG00000015972_007i"	"ENSRNOG00000015972"	"Ano5"	9167	14	14	11	9	15	0	0	1	0	2	0	0	0	2	0	0	0	0	0	0	0	0	0	0	0	0	1	0	0	0	0	0	0	0	0	0	0	0	0	0	0	0	0	0	0	0	0	0	0	0	NA	NA	12.6	0.6	0.00137449547289189	6.54521653758045e-05	0.4	0	0.2	0	0	0	-3.04452243772342	FALSE	FALSE
"1"	106937580	106938251	"+"	"ENSRNOG00000015972_008i"	"ENSRNOG00000015972"	"Ano5"	671	4	0	2	0	4	0	0	0	0	0	0	0	7	6	0	0	0	0	0	0	0	0	0	0	0	0	0	0	0	0	0	0	0	0	0	0	0	0	0	0	0	0	0	0	0	0	0	0	0	0	NA	NA	2	0	0.0029806259314456	0	2.6	0	0	0	0	0	-Inf	FALSE	FALSE
"1"	106938358	106938507	"+"	"ENSRNOG00000015972_009i"	"ENSRNOG00000015972"	"Ano5"	149	3	0	0	0	0	0	0	0	0	0	0	0	5	2	1	0	0	0	0	0	0	0	0	0	0	0	0	0	0	0	0	0	0	0	0	0	3	0	0	0	0	0	0	0	0	0	0	0	0	0	NA	NA	0.6	0	0.00402684563758389	0	1.6	0	0	0	0.6	0	-Inf	FALSE	FALSE
"1"	106938569	106947350	"+"	"ENSRNOG00000015972_010i"	"ENSRNOG00000015972"	"Ano5"	8781	8	21	12	4	12	0	0	0	0	0	0	0	0	2	2	0	0	0	0	0	0	0	0	0	0	0	0	0	0	0	0	0	0	0	0	0	0	0	0	0	0	0	0	0	0	0	0	0	0	0	NA	NA	11.4	0	0.0012982576016399	0	0.8	0	0	0	0	0	-Inf	FALSE	FALSE
"1"	106947503	106949605	"+"	"ENSRNOG00000015972_011i"	"ENSRNOG00000015972"	"Ano5"	2102	1	0	1	0	0	0	0	0	0	0	0	0	7	3	4	1	0	0	0	0	0	0	0	0	0	0	0	0	0	0	0	0	0	0	0	0	0	0	0	0	0	0	0	0	0	0	0	0	0	0	NA	NA	0.4	0	0.000190294957183635	0	3	0	0	0	0	0	-Inf	FALSE	FALSE
"1"	106949681	106951572	"+"	"ENSRNOG00000015972_012i"	"ENSRNOG00000015972"	"Ano5"	1891	2	0	0	5	3	0	0	0	0	0	0	0	4	7	4	1	0	7	0	0	1	1	0	0	0	0	0	0	0	0	0	0	0	0	0	0	0	0	0	5	2	0	0	0	0	0	0	0	0	0	NA	NA	2	0	0.00105764145954521	0	3.2	1.8	0	0	1.4	0	-Inf	FALSE	FALSE
"1"	106951796	106953376	"+"	"ENSRNOG00000015972_013i"	"ENSRNOG00000015972"	"Ano5"	1580	0	2	0	0	1	0	2	0	0	0	0	0	3	0	2	2	0	0	0	0	0	0	0	0	0	0	0	0	1	0	0	0	0	0	0	0	0	2	0	0	0	0	0	0	0	0	0	0	0	0	NA	NA	0.6	0.4	0.000379746835443038	0.000253164556962025	1.4	0	0.2	0	0.4	0	-0.405465108108164	FALSE	FALSE
"1"	106953547	106956273	"+"	"ENSRNOG00000015972_015i"	"ENSRNOG00000015972"	"Ano5"	2726	2	3	5	0	1	0	0	0	0	0	0	0	2	0	0	0	0	0	2	0	0	0	0	0	0	0	0	0	0	0	0	0	0	0	0	0	0	0	0	0	0	0	0	0	0	0	0	0	0	0	NA	NA	2.2	0	0.000807043286867205	0	0.4	0.4	0	0	0	0	-Inf	FALSE	FALSE
"1"	106956372	106960016	"+"	"ENSRNOG00000015972_016i"	"ENSRNOG00000015972"	"Ano5"	3644	4	24	2	1	8	0	0	2	0	0	0	0	4	2	0	0	0	0	0	0	0	0	0	0	0	0	0	0	0	0	0	0	0	0	0	0	0	0	0	0	0	0	0	0	0	0	0	0	0	0	NA	NA	7.8	0.4	0.00214050493962678	0.000109769484083425	1.2	0	0	0	0	0	-2.9704144655697	FALSE	FALSE
"1"	106960148	106961588	"+"	"ENSRNOG00000015972_017i"	"ENSRNOG00000015972"	"Ano5"	1440	7	0	2	2	0	0	0	0	0	0	0	0	6	2	0	0	0	0	0	0	0	0	0	0	0	0	0	0	0	0	0	0	0	0	0	0	7	0	0	2	0	0	0	0	0	0	0	0	0	0	NA	NA	2.2	0	0.00152777777777778	0	1.6	0	0	0	1.8	0	-Inf	FALSE	FALSE
"1"	106961795	106963844	"+"	"ENSRNOG00000015972_018i"	"ENSRNOG00000015972"	"Ano5"	2049	9	2	6	2	6	0	0	0	0	3	1	0	8	6	3	2	0	0	0	0	0	2	0	0	0	0	0	0	0	0	0	0	0	0	0	0	0	0	0	0	1	0	0	0	0	0	0	0	0	0	NA	NA	5	0.6	0.00244021473889702	0.000292825768667643	3.8	0.4	0	0	0.2	0	-2.12026353620009	FALSE	FALSE
"1"	106964024	106965846	"+"	"ENSRNOG00000015972_019i"	"ENSRNOG00000015972"	"Ano5"	1822	2	0	6	9	1	0	0	0	0	0	0	0	3	1	0	1	0	0	0	2	0	0	0	0	0	0	0	1	0	0	0	0	0	0	0	0	0	0	1	1	0	0	0	0	0	0	0	0	0	0	NA	NA	3.6	0	0.00197585071350165	0	1	0.4	0.2	0	0.4	0	-Inf	FALSE	FALSE
"1"	106965953	106968666	"+"	"ENSRNOG00000015972_020i"	"ENSRNOG00000015972"	"Ano5"	2713	2	0	2	7	8	0	0	0	1	0	0	0	2	4	3	0	1	0	0	2	0	0	0	0	0	0	2	5	3	0	0	0	0	0	0	0	0	0	0	0	0	0	0	0	0	0	0	0	0	0	NA	NA	3.8	0.2	0.00140066347217103	7.37191301142647e-05	2	0.4	2	0	0	0	-2.94443897916644	FALSE	FALSE
"1"	106999252	107001997	"+"	"ENSRNOG00000016147_001i"	"ENSRNOG00000016147"	"Slc17a6"	2745	8	0	0	1	1	0	0	6	0	0	3	0	13	14	20	2	2	4	0	0	5	1	17	3	0	0	0	0	0	0	0	0	0	0	0	0	0	0	0	0	0	0	0	0	0	0	0	0	0	0	NA	NA	2	1.2	0.000728597449908925	0.000437158469945355	10.2	2	0	0	0	0	-0.510825623765991	FALSE	FALSE
"1"	107002251	107003593	"+"	"ENSRNOG00000016147_002i"	"ENSRNOG00000016147"	"Slc17a6"	1342	3	3	2	4	8	0	0	0	0	0	5	0	24	22	21	2	5	0	21	12	0	0	7	1	0	0	1	1	2	0	0	0	0	0	0	0	0	0	0	0	0	0	0	0	0	0	5	0	0	0	NA	NA	4	0	0.0029806259314456	0	14.8	6.6	0.8	0	0	0	-Inf	FALSE	FALSE
"1"	107003713	107019656	"+"	"ENSRNOG00000016147_003i"	"ENSRNOG00000016147"	"Slc17a6"	15943	36	48	54	65	39	0	0	4	3	8	42	1	9	15	19	3	4	7	5	6	0	3	22	1	0	0	0	0	0	0	0	0	0	0	1	0	0	0	0	0	1	0	0	0	0	0	0	0	0	0	NA	NA	48.4	3	0.00303581509126262	0.000188170356896444	10	4.2	0	0	0.2	0	-2.78088752505448	FALSE	FALSE
"1"	107019772	107020834	"+"	"ENSRNOG00000016147_004i"	"ENSRNOG00000016147"	"Slc17a6"	1062	6	7	3	4	2	0	0	0	0	4	5	0	6	8	3	0	2	0	0	6	4	0	29	3	0	0	0	0	1	0	0	0	0	0	0	0	0	0	0	2	0	0	0	0	0	0	0	0	0	0	NA	NA	4.4	0.8	0.00414312617702448	0.000753295668549906	3.8	2	0.2	0	0.4	0	-1.70474809223843	FALSE	FALSE
"1"	107020923	107022585	"+"	"ENSRNOG00000016147_005i"	"ENSRNOG00000016147"	"Slc17a6"	1662	12	7	3	19	9	7	0	0	0	0	12	0	5	12	6	2	6	17	0	1	7	6	13	0	2	0	0	0	0	0	0	0	0	0	0	0	3	0	0	1	0	0	0	0	0	0	0	0	0	0	NA	NA	10	1.4	0.00601684717208183	0.000842358604091456	6.2	6.2	0.4	0	0.8	0	-1.96611285637283	TRUE	FALSE
"1"	107022673	107025560	"+"	"ENSRNOG00000016147_006i"	"ENSRNOG00000016147"	"Slc17a6"	2887	7	4	5	1	3	0	0	0	0	0	0	0	17	20	15	6	2	0	5	0	0	8	18	0	0	0	2	0	0	0	0	0	0	0	0	0	0	1	0	0	0	0	0	0	0	0	0	0	0	0	NA	NA	4	0	0.00138552130239002	0	12	2.6	0.4	0	0.2	0	-Inf	FALSE	FALSE
"1"	107025704	107029128	"+"	"ENSRNOG00000016147_007i"	"ENSRNOG00000016147"	"Slc17a6"	3424	4	2	11	8	8	0	0	0	0	0	3	0	3	3	10	0	2	7	0	2	0	1	20	1	0	0	0	1	1	0	0	0	0	0	0	0	0	0	2	0	0	0	0	0	0	0	0	0	0	0	NA	NA	6.6	0	0.00192757009345794	0	3.6	2	0.4	0	0.4	0	-Inf	FALSE	FALSE
"1"	107029279	107033703	"+"	"ENSRNOG00000016147_008i"	"ENSRNOG00000016147"	"Slc17a6"	4424	3	7	5	27	24	0	0	3	3	0	2	0	11	7	1	4	0	0	0	1	0	0	45	5	0	0	0	0	0	0	0	0	0	0	0	0	0	1	0	0	0	0	0	0	0	0	0	0	0	0	NA	NA	13.2	1.2	0.00298372513562387	0.00027124773960217	4.6	0.2	0	0	0.2	0	-2.39789527279837	FALSE	FALSE
"1"	107033837	107035119	"+"	"ENSRNOG00000016147_009i"	"ENSRNOG00000016147"	"Slc17a6"	1282	2	7	8	0	2	0	0	0	0	0	4	0	6	9	7	5	2	10	0	3	2	7	19	3	0	0	0	0	0	0	0	0	0	0	0	0	0	0	0	0	0	0	0	0	0	0	0	0	0	0	NA	NA	3.8	0	0.00296411856474259	0	5.8	4.4	0	0	0	0	-Inf	FALSE	FALSE
"1"	107035231	107035593	"+"	"ENSRNOG00000016147_010i"	"ENSRNOG00000016147"	"Slc17a6"	362	3	0	0	4	0	0	0	0	0	9	7	0	3	10	7	16	2	5	5	4	6	0	15	1	0	0	0	1	0	0	0	0	0	8	0	0	0	0	0	1	0	0	0	0	0	0	1	0	0	0	NA	NA	1.4	1.8	0.00386740331491713	0.00497237569060774	7.6	4	0.2	1.6	0.2	0	0.251314428280906	FALSE	FALSE
"1"	107035722	107036609	"+"	"ENSRNOG00000016147_011i"	"ENSRNOG00000016147"	"Slc17a6"	887	5	0	7	1	5	0	0	0	0	0	1	0	17	2	13	3	3	10	2	1	3	1	39	9	0	0	0	0	0	0	0	0	0	0	0	0	0	0	0	0	1	0	0	0	0	0	0	0	0	0	NA	NA	3.6	0	0.00405862457722661	0	7.6	3.4	0	0	0.2	0	-Inf	FALSE	FALSE
"1"	107144625	107149526	"-"	"ENSRNOG00000052081_001i"	"ENSRNOG00000052081"	"AABR07003354.1"	4901	0	0	0	0	0	0	0	0	0	0	0	0	0	0	0	0	0	0	0	0	0	0	0	0	0	0	0	0	0	0	0	0	0	0	0	0	0	0	0	0	0	0	0	0	0	0	0	0	0	0	NA	NA	0	0	0	0	0	0	0	0	0	0	NA	FALSE	FALSE
"1"	107149628	107166255	"-"	"ENSRNOG00000052081_002i"	"ENSRNOG00000052081"	"AABR07003354.1"	16627	0	0	3	0	0	0	0	2	0	4	38	5	0	0	0	0	0	0	0	0	0	0	0	0	0	0	0	0	0	0	0	0	0	0	0	0	0	0	0	0	0	0	0	0	0	0	0	0	0	0	NA	NA	0.6	1.2	3.60858844048836e-05	7.21717688097672e-05	0	0	0	0	0	0	0.693147180559945	FALSE	FALSE
"1"	107262765	107263211	"+"	"ENSRNOG00000016717_001i"	"ENSRNOG00000016717"	"Gas2"	446	0	3	5	1	4	0	0	0	0	3	0	0	1	0	3	0	0	0	3	4	3	0	0	0	0	0	0	0	0	0	0	0	0	0	0	0	0	1	3	0	0	0	0	0	0	3	0	0	0	0	NA	NA	2.6	0.6	0.00582959641255605	0.00134529147982063	0.8	2	0	0	0.8	0.6	-1.46633706879343	FALSE	FALSE
"1"	107263377	107272131	"+"	"ENSRNOG00000016717_002i"	"ENSRNOG00000016717"	"Gas2"	8754	7	5	14	7	7	0	0	0	0	0	0	0	1	0	5	1	0	0	0	0	3	0	0	0	0	0	0	0	0	0	0	0	0	0	0	0	0	0	0	0	0	0	0	0	0	0	0	0	0	0	NA	NA	8	0	0.000913867946081791	0	1.4	0.6	0	0	0	0	-Inf	FALSE	FALSE
"1"	107272254	107294949	"+"	"ENSRNOG00000016717_003i"	"ENSRNOG00000016717"	"Gas2"	22695	16	50	21	64	64	0	0	0	0	7	2	0	2	0	0	8	0	0	0	0	2	0	1	0	0	1	0	0	0	0	0	0	0	0	0	0	0	0	0	2	0	0	0	0	0	0	0	0	0	0	NA	NA	43	1.4	0.00189469046045384	6.16875963868694e-05	2	0.4	0.2	0	0.4	0	-3.42472787907235	FALSE	FALSE
"1"	107295092	107305632	"+"	"ENSRNOG00000016717_004i"	"ENSRNOG00000016717"	"Gas2"	10540	24	31	28	75	63	0	0	5	2	3	113	0	0	0	0	0	0	0	0	0	0	0	0	0	1	0	0	0	0	0	0	0	0	0	0	0	2	0	1	0	0	0	0	0	0	0	2	0	0	0	NA	NA	44.2	2	0.00419354838709677	0.000189753320683112	0	0	0.2	0	0.6	0	-3.09557760852371	FALSE	FALSE
"1"	107305697	107313310	"+"	"ENSRNOG00000016717_005i"	"ENSRNOG00000016717"	"Gas2"	7613	38	65	24	103	63	0	8	0	0	3	39	0	0	4	5	2	1	0	6	4	0	2	0	0	0	0	1	1	0	0	0	0	0	0	0	0	0	0	0	5	0	0	0	0	0	0	0	0	0	0	NA	NA	58.6	2.2	0.00769735977932484	0.000288979377380796	2.4	2.4	0.4	0	1	0	-3.2822773362187	TRUE	FALSE
"1"	107313453	107320659	"+"	"ENSRNOG00000016717_006i"	"ENSRNOG00000016717"	"Gas2"	7206	8	18	4	12	20	0	0	0	0	3	0	0	0	4	7	4	6	4	0	15	2	1	0	0	0	0	0	0	0	0	0	0	0	0	0	0	0	0	0	0	0	0	0	0	0	0	0	0	0	0	NA	NA	12.4	0.6	0.00172078823202886	8.32639467110741e-05	4.2	4.4	0	0	0	0	-3.02852209637698	FALSE	FALSE
"1"	107320768	107344903	"+"	"ENSRNOG00000016717_007i"	"ENSRNOG00000016717"	"Gas2"	24135	48	85	70	78	58	0	0	0	9	9	6	0	0	0	3	0	0	0	0	0	0	0	1	0	0	0	0	1	0	0	0	0	0	0	0	0	0	0	0	0	0	0	0	0	0	0	5	0	0	0	NA	NA	67.8	3.6	0.00280919825978869	0.000149160969546302	0.6	0	0.2	0	0	0	-2.93562834948429	FALSE	FALSE
"1"	107345231	107362377	"+"	"ENSRNOG00000016717_008i"	"ENSRNOG00000016717"	"Gas2"	17146	30	35	33	68	39	0	0	0	0	1	1	0	2	2	3	5	1	0	0	0	0	2	1	0	0	0	0	0	1	0	0	0	0	0	0	0	0	0	0	0	0	0	0	0	0	0	0	0	0	0	NA	22	41	0.2	0.00239122827481628	1.16645281698355e-05	2.6	0.4	0.2	0	0	0	-5.32300997913841	FALSE	FALSE
"1"	107368960	107371380	"-"	"ENSRNOG00000037137_001i"	"ENSRNOG00000037137"	"Svip"	2420	9	26	17	20	12	0	0	0	1	7	31	0	2	9	4	2	3	10	10	20	18	15	30	0	0	7	4	3	0	0	0	0	0	0	0	0	1	4	1	2	4	0	0	0	0	0	0	0	0	0	NA	NA	16.8	1.6	0.00694214876033058	0.000661157024793388	4	14.6	2.8	0	2.4	0	-2.35137525716348	TRUE	FALSE
"1"	107371492	107371887	"-"	"ENSRNOG00000037137_002i"	"ENSRNOG00000037137"	"Svip"	395	3	19	8	7	12	11	17	3	0	0	54	3	18	20	19	2	2	12	31	12	0	3	2	2	0	0	1	1	2	0	0	2	0	0	3	0	0	12	0	3	0	0	0	0	0	0	2	0	0	0	NA	NA	9.8	6.2	0.0248101265822785	0.0156962025316456	12.2	11.6	0.8	0.4	3	0	-0.45783309362548	TRUE	FALSE
"1"	107371939	107373632	"-"	"ENSRNOG00000037137_003i"	"ENSRNOG00000037137"	"Svip"	1693	17	25	13	16	15	0	2	0	0	0	0	0	10	9	16	1	8	24	6	3	0	0	12	24	0	0	0	1	0	0	0	0	0	0	0	0	0	0	1	0	0	0	0	0	0	0	0	0	0	0	NA	NA	17.2	0.4	0.0101594802126403	0.000236266981689309	8.8	6.6	0.2	0	0.2	0	-3.76120011569356	TRUE	FALSE
"1"	107381510	107383033	"-"	"ENSRNOG00000049297_001i"	"ENSRNOG00000049297"	"Ccdc179"	1523	0	0	0	0	0	0	0	0	0	0	0	0	0	0	0	0	0	0	0	0	0	0	0	0	0	0	0	0	0	0	0	0	0	0	0	0	0	0	0	0	0	0	0	0	0	0	0	0	0	0	NA	NA	0	0	0	0	0	0	0	0	0	0	NA	FALSE	FALSE
"1"	107383139	107384408	"-"	"ENSRNOG00000049297_002i"	"ENSRNOG00000049297"	"Ccdc179"	1269	0	0	0	0	0	0	0	0	0	0	0	0	0	0	0	0	0	0	0	0	0	0	0	0	0	0	0	0	0	0	0	0	0	0	0	0	0	0	0	0	0	0	0	0	0	0	0	0	0	0	NA	NA	0	0	0	0	0	0	0	0	0	0	NA	FALSE	FALSE
"1"	107384454	107385196	"-"	"ENSRNOG00000049297_003i"	"ENSRNOG00000049297"	"Ccdc179"	742	0	0	0	0	0	0	0	0	0	1	0	0	0	0	0	0	0	0	0	0	0	0	0	0	0	0	0	0	0	0	0	0	0	0	0	0	0	0	0	0	0	0	0	0	0	0	0	0	0	0	NA	NA	0	0.2	0	0.000269541778975741	0	0	0	0	0	0	Inf	FALSE	FALSE
"1"	108266120	108267264	"+"	"ENSRNOG00000051504_001i"	"ENSRNOG00000051504"	"AABR07003380.1"	1144	0	0	0	0	0	0	0	0	0	0	0	0	0	0	0	0	0	0	0	0	0	0	0	0	0	0	0	0	0	0	0	0	0	0	0	0	0	0	0	0	0	0	0	0	0	0	0	0	0	0	NA	NA	0	0	0	0	0	0	0	0	0	0	NA	FALSE	FALSE
"1"	108267376	108267479	"+"	"ENSRNOG00000051504_002i"	"ENSRNOG00000051504"	"AABR07003380.1"	103	0	0	0	0	0	0	0	0	0	0	0	0	0	0	0	0	0	0	0	0	0	0	0	0	0	0	0	0	0	0	0	0	0	0	0	0	0	0	0	0	0	0	0	0	0	0	0	0	0	0	NA	NA	0	0	0	0	0	0	0	0	0	0	NA	FALSE	FALSE
"1"	108549224	108554604	"-"	"ENSRNOG00000056901_001i"	"ENSRNOG00000056901"	"AABR07003390.1"	5380	0	0	0	0	0	0	0	0	0	0	0	0	0	0	0	0	0	0	0	0	0	0	0	0	0	0	0	0	0	0	0	0	0	0	0	0	0	0	0	0	0	0	0	0	0	0	0	0	0	0	NA	NA	0	0	0	0	0	0	0	0	0	0	NA	FALSE	FALSE
"1"	108617916	108641540	"-"	"ENSRNOG00000061672_001i"	"ENSRNOG00000061672"	"AABR07003392.1"	23624	0	0	0	0	0	0	0	0	0	6	0	0	0	0	0	0	0	0	0	0	0	0	0	0	0	0	0	0	0	0	0	0	0	0	0	0	0	0	0	0	0	0	0	0	0	3	0	0	0	0	NA	NA	0	1.2	0	5.07958008804605e-05	0	0	0	0	0	0.6	Inf	FALSE	FALSE
"1"	108641596	108662948	"-"	"ENSRNOG00000061672_002i"	"ENSRNOG00000061672"	"AABR07003392.1"	21352	0	0	0	0	0	0	0	0	0	1	0	0	0	0	0	0	0	0	0	0	0	0	0	0	0	0	0	0	0	0	0	0	0	0	0	0	0	0	0	0	0	0	0	0	0	0	0	0	0	0	NA	NA	0	0.2	0	9.36680404645935e-06	0	0	0	0	0	0	Inf	FALSE	FALSE
"1"	108830671	108839840	"-"	"ENSRNOG00000057506_001i"	"ENSRNOG00000057506"	"AABR07003397.1"	9169	0	0	0	0	0	0	0	1	0	7	0	0	0	0	0	0	0	0	0	0	0	0	0	0	0	0	0	0	0	0	0	0	0	0	0	0	0	0	0	0	0	0	0	0	0	0	0	0	0	0	NA	NA	0	1.6	0	0.000174501036099902	0	0	0	0	0	0	Inf	FALSE	FALSE
"1"	108839949	108840303	"-"	"ENSRNOG00000057506_002i"	"ENSRNOG00000057506"	"AABR07003397.1"	354	0	0	0	0	0	0	0	0	0	0	0	0	0	0	0	0	0	0	0	0	0	0	0	0	0	0	0	0	0	0	0	0	0	0	0	0	0	0	0	0	0	0	0	0	0	0	0	0	0	0	NA	NA	0	0	0	0	0	0	0	0	0	0	NA	FALSE	FALSE
"1"	108840373	108840476	"-"	"ENSRNOG00000057506_003i"	"ENSRNOG00000057506"	"AABR07003397.1"	103	0	0	0	0	0	0	0	0	0	0	0	0	0	0	0	0	0	0	0	0	0	0	0	0	0	0	0	0	0	0	0	0	0	0	0	0	0	0	0	0	0	0	0	0	0	0	0	0	0	0	NA	NA	0	0	0	0	0	0	0	0	0	0	NA	FALSE	FALSE
"1"	108918004	108919125	"+"	"ENSRNOG00000060326_001i"	"ENSRNOG00000060326"	"AABR07003398.1"	1121	0	0	0	0	0	0	0	0	0	0	0	0	0	0	0	0	0	0	0	0	0	0	0	0	0	0	0	0	0	0	0	0	0	0	0	0	0	0	0	0	0	0	0	0	0	0	0	0	0	0	NA	NA	0	0	0	0	0	0	0	0	0	0	NA	FALSE	FALSE
"1"	109462545	109463689	"+"	"ENSRNOG00000051394_001i"	"ENSRNOG00000051394"	"AABR07003418.1"	1144	0	0	0	0	0	0	0	0	0	0	0	0	0	0	0	0	0	0	0	0	0	0	0	0	0	0	0	0	0	0	0	0	0	0	0	0	0	0	0	0	0	0	0	0	0	0	0	0	0	0	NA	NA	0	0	0	0	0	0	0	0	0	0	NA	FALSE	FALSE
"1"	109463801	109463904	"+"	"ENSRNOG00000051394_002i"	"ENSRNOG00000051394"	"AABR07003418.1"	103	0	0	0	0	0	0	0	0	0	0	0	0	0	0	0	0	0	0	0	0	0	0	0	0	0	0	0	0	0	0	0	0	0	0	0	0	0	0	0	0	0	0	0	0	0	0	0	0	0	0	NA	NA	0	0	0	0	0	0	0	0	0	0	NA	FALSE	FALSE
"1"	109666038	109666062	"+"	"ENSRNOG00000037133_003i"	"ENSRNOG00000037133"	"AABR07003433.1"	24	0	0	0	0	0	0	0	0	0	0	0	2	0	0	0	0	0	0	0	0	0	0	0	0	0	0	0	0	0	0	0	0	0	0	0	0	0	0	0	0	0	0	0	0	0	0	0	0	0	0	NA	NA	0	0	0	0	0	0	0	0	0	0	NA	FALSE	FALSE
"1"	110026801	110028031	"+"	"ENSRNOG00000051655_001i"	"ENSRNOG00000051655"	"AABR07003449.1"	1230	0	0	0	0	0	0	0	0	0	0	0	0	0	0	0	0	0	0	0	0	0	0	0	0	0	0	0	0	0	0	0	0	0	0	0	0	0	0	0	0	0	0	0	0	0	0	0	0	0	0	NA	NA	0	0	0	0	0	0	0	0	0	0	NA	FALSE	FALSE
"1"	1102032	1102695	"-"	"ENSRNOG00000040300_001i"	"ENSRNOG00000040300"	"Raet1e"	663	0	0	0	0	0	0	0	0	0	0	0	0	0	0	0	0	0	0	0	0	0	0	0	0	0	0	0	0	0	0	0	0	0	0	0	0	0	0	0	0	0	0	0	0	0	0	0	0	0	0	NA	NA	0	0	0	0	0	0	0	0	0	0	NA	FALSE	FALSE
"1"	1102838	1103428	"-"	"ENSRNOG00000040300_002i"	"ENSRNOG00000040300"	"Raet1e"	590	0	0	0	1	0	0	0	0	0	1	0	0	0	0	0	0	0	0	0	0	0	0	0	0	0	0	0	0	0	0	0	0	0	0	0	0	0	0	0	0	0	0	0	0	0	0	0	0	0	0	NA	NA	0.2	0.2	0.000338983050847458	0.000338983050847458	0	0	0	0	0	0	0	FALSE	FALSE
"1"	1103580	1104126	"-"	"ENSRNOG00000040300_004i"	"ENSRNOG00000040300"	"Raet1e"	546	0	0	0	0	0	0	0	0	0	0	0	0	0	0	0	0	0	0	0	0	0	0	0	0	0	0	0	0	0	0	0	0	0	0	0	0	0	0	0	0	0	0	0	0	0	0	0	0	0	0	NA	NA	0	0	0	0	0	0	0	0	0	0	NA	FALSE	FALSE
"1"	1104376	1104637	"-"	"ENSRNOG00000040300_005i"	"ENSRNOG00000040300"	"Raet1e"	261	0	0	0	0	0	0	0	0	0	0	0	0	0	0	0	0	0	0	0	0	0	0	0	0	0	0	0	0	0	0	0	0	0	0	0	0	0	0	0	0	0	0	0	0	0	0	0	0	0	0	NA	NA	0	0	0	0	0	0	0	0	0	0	NA	FALSE	FALSE
"1"	1104899	1116610	"-"	"ENSRNOG00000040300_006i"	"ENSRNOG00000040300"	"Raet1e"	11711	0	0	0	0	1	0	0	0	0	0	0	0	0	0	0	0	0	0	0	0	0	0	0	0	0	0	0	0	0	0	0	0	0	0	0	0	0	0	0	0	0	0	0	0	0	0	0	0	0	0	NA	NA	0.2	0	1.70779608914696e-05	0	0	0	0	0	0	0	-Inf	FALSE	FALSE
"1"	110995850	111001824	"+"	"ENSRNOG00000058191_001i"	"ENSRNOG00000058191"	"AABR07003468.1"	5974	0	0	0	0	0	0	0	0	0	0	0	0	0	0	0	0	0	0	0	0	0	0	0	0	0	0	0	0	0	0	0	0	0	0	0	0	0	0	0	0	0	0	0	0	0	0	0	0	0	0	NA	NA	0	0	0	0	0	0	0	0	0	0	NA	FALSE	FALSE
"1"	112158926	112164672	"-"	"ENSRNOG00000014862_001i"	"ENSRNOG00000014862"	"Gabrg3"	5746	5	17	22	36	44	0	0	0	0	1	8	0	3	7	7	17	16	0	6	0	9	1	1	1	0	0	4	0	0	0	0	0	0	0	0	0	0	0	0	0	0	0	0	0	0	0	0	0	0	0	NA	NA	24.8	0.2	0.00431604594500522	3.48068221371389e-05	10	3.2	0.8	0	0	0	-4.82028156560504	FALSE	FALSE
"1"	112164733	112165033	"-"	"ENSRNOG00000014862_002i"	"ENSRNOG00000014862"	"Gabrg3"	300	0	0	1	0	1	0	0	0	0	0	0	0	17	37	20	25	14	11	12	5	23	5	2	2	0	0	0	0	0	0	0	0	0	0	0	0	0	0	0	0	0	0	0	0	0	0	0	0	0	0	NA	NA	0.4	0	0.00133333333333333	0	22.6	11.2	0	0	0	0	-Inf	FALSE	FALSE
"1"	112165231	112202340	"-"	"ENSRNOG00000014862_003i"	"ENSRNOG00000014862"	"Gabrg3"	37109	21	13	18	11	15	0	0	0	0	0	70	0	4	6	1	4	2	0	0	0	7	11	9	7	2	1	0	0	2	0	0	0	0	0	0	0	0	0	0	2	0	0	0	0	0	0	0	0	0	0	NA	NA	15.6	0	0.000420383195451238	0	3.4	3.6	1	0	0.4	0	-Inf	FALSE	FALSE
"1"	112202494	112253442	"-"	"ENSRNOG00000014862_004i"	"ENSRNOG00000014862"	"Gabrg3"	50948	55	100	63	173	157	0	0	0	2	14	0	0	1	0	1	3	0	0	0	2	0	0	8	3	0	0	0	0	0	0	0	0	0	0	0	0	0	0	0	0	0	0	0	0	0	0	0	0	0	0	NA	NA	109.6	3.2	0.00215121300149172	6.28091387296852e-05	1	0.4	0	0	0	0	-3.53368656470823	FALSE	FALSE
"1"	112253581	112435003	"-"	"ENSRNOG00000014862_005i"	"ENSRNOG00000014862"	"Gabrg3"	181422	608	868	768	2409	1917	5	1	8	24	66	16	0	8	3	3	3	1	5	7	2	0	0	0	0	0	0	0	0	2	0	0	0	0	0	0	0	0	2	1	0	1	0	0	0	0	0	0	0	0	0	53	NA	1314	20.8	0.00724278202202599	0.000114649821962055	3.6	2.8	0.4	0	0.8	0	-4.14587821233728	TRUE	FALSE
"1"	112435087	112436573	"-"	"ENSRNOG00000014862_006i"	"ENSRNOG00000014862"	"Gabrg3"	1486	2	7	0	10	1	0	0	0	0	0	0	0	9	19	15	19	9	34	20	16	14	14	7	0	0	0	0	0	0	0	0	0	0	0	0	0	0	0	0	0	1	0	0	0	0	0	0	0	0	0	NA	NA	4	0	0.00269179004037685	0	14.2	19.6	0	0	0.2	0	-Inf	FALSE	FALSE
"1"	112835175	112846058	"-"	"ENSRNOG00000046226+ENSRNOG00000010803_002i"	"ENSRNOG00000010803"	"Gabra5"	10883	98	110	129	342	330	0	7	3	6	14	36	3	113	164	102	61	88	80	21	61	54	71	186	6	1	1	1	24	20	0	0	0	0	0	0	0	0	0	0	1	0	0	0	0	0	0	0	0	0	0	NA	NA	201.8	6	0.01854268124598	0.000551318570247175	105.6	57.4	9.4	0	0.2	0	-3.51551763869145	TRUE	FALSE
"1"	112846271	112859675	"-"	"ENSRNOG00000046226+ENSRNOG00000010803_003i"	"ENSRNOG00000010803"	"Gabra5"	13404	96	88	106	251	247	0	0	0	2	6	112	1	143	118	137	180	154	104	74	72	84	68	276	2	0	0	0	4	3	0	0	0	0	0	0	0	0	0	2	3	0	0	0	0	0	0	2	0	0	0	NA	NA	157.6	1.6	0.0117576842733512	0.000119367353028947	146.4	80.4	1.4	0	1	0	-4.59005654817804	TRUE	FALSE
"1"	112859829	112863257	"-"	"ENSRNOG00000046226+ENSRNOG00000010803_004i"	"ENSRNOG00000010803"	"Gabra5"	3428	154	126	142	192	274	4	0	8	15	14	150	1	47	56	50	47	72	43	51	21	54	10	518	11	9	14	3	1	2	0	0	0	0	0	3	1	10	1	4	0	7	0	0	0	0	0	4	0	0	0	NA	NA	177.6	8.2	0.0518086347724621	0.00239206534422404	54.4	35.8	5.8	0	4.4	0	-3.07539967628786	TRUE	FALSE
"1"	112863402	112890172	"-"	"ENSRNOG00000046226+ENSRNOG00000010803_005i"	"ENSRNOG00000010803"	"Gabra5"	26770	628	668	747	1417	1353	22	6	8	25	44	83	1	143	154	159	27	30	141	88	66	17	26	262	24	7	3	1	2	2	0	0	0	0	0	0	0	0	5	5	6	5	0	0	0	0	0	0	0	0	0	NA	NA	962.6	21	0.0359581621217781	0.000784460216660441	102.6	67.6	3	0	4.2	0	-3.82511551914559	TRUE	FALSE
"1"	112890256	112926909	"-"	"ENSRNOG00000046226+ENSRNOG00000010803_006i"	"ENSRNOG00000010803"	"Gabra5"	36653	751	624	698	1973	1861	0	1	1	24	54	26	0	148	204	162	199	195	106	105	62	120	72	437	5	1	2	2	1	1	0	0	0	0	1	0	0	0	0	3	0	1	0	0	0	0	0	0	0	0	0	21	NA	1181.4	16	0.0322320137505798	0.000436526341636428	181.6	93	1.4	0.2	0.8	0	-4.30186673263335	TRUE	FALSE
"1"	112927131	112927234	"-"	"ENSRNOG00000046226+ENSRNOG00000010803_007i"	"ENSRNOG00000010803"	"Gabra5"	103	10	3	4	4	3	0	0	0	0	0	0	0	77	146	112	284	196	62	58	45	173	89	154	7	8	0	1	1	0	0	0	0	0	0	0	0	2	3	3	2	1	0	0	0	0	0	0	0	0	0	NA	NA	4.8	0	0.0466019417475728	0	163	85.4	2	0	2.2	0	-Inf	TRUE	FALSE
"1"	112927303	112928908	"-"	"ENSRNOG00000046226+ENSRNOG00000010803_008i"	"ENSRNOG00000010803"	"Gabra5"	1605	28	45	35	36	46	6	0	0	0	2	15	0	55	81	59	52	51	22	33	51	22	33	373	8	1	0	0	0	1	0	0	0	0	0	0	0	0	3	3	2	5	0	0	0	0	0	0	0	0	0	NA	NA	38	1.6	0.0236760124610592	0.000996884735202492	59.6	32.2	0.4	0	2.6	0	-3.16758253048065	TRUE	FALSE
"1"	112929031	112945358	"-"	"ENSRNOG00000046226+ENSRNOG00000010803_009i"	"ENSRNOG00000010803"	"Gabra5"	16327	432	375	385	768	783	0	8	1	10	47	10	0	341	492	413	256	210	272	221	200	90	55	169	6	9	5	6	4	8	0	0	0	1	1	0	0	4	1	0	0	0	0	0	0	0	0	0	0	0	0	NA	NA	548.6	13.2	0.0336007839774606	0.000808476756293257	342.4	167.6	6.4	0.4	1	0	-3.72715274891118	TRUE	FALSE
"1"	112945519	112945876	"-"	"ENSRNOG00000046226+ENSRNOG00000010803_010i"	"ENSRNOG00000010803"	"Gabra5"	357	17	48	29	13	26	0	8	5	0	4	56	13	52	87	85	39	19	43	34	59	26	11	162	2	2	9	0	4	2	0	0	0	0	0	0	0	12	29	27	3	3	0	8	5	0	0	20	3	0	0	NA	NA	26.6	3.4	0.0745098039215686	0.00952380952380952	56.4	34.6	3.4	0	14.8	2.6	-2.05713578416554	TRUE	FALSE
"1"	112945937	112946560	"-"	"ENSRNOG00000046226+ENSRNOG00000010803_011i"	"ENSRNOG00000010803"	"Gabra5"	623	37	28	33	62	60	0	8	0	0	14	63	17	66	69	69	23	35	32	15	44	18	12	6	29	0	0	0	2	0	0	0	0	0	0	0	0	3	3	2	2	4	0	0	0	0	0	14	2	0	0	NA	NA	44	4.4	0.0706260032102729	0.00706260032102729	52.4	24.2	0.4	0	2.8	0	-2.30258509299405	TRUE	FALSE
"1"	112946761	112947128	"-"	"ENSRNOG00000046226+ENSRNOG00000010803_014i"	"ENSRNOG00000010803"	"Gabra5"	367	1	8	3	2	3	0	0	0	0	0	47	32	27	31	35	5	11	28	11	11	15	0	0	6	0	2	0	0	0	0	0	0	0	0	0	0	0	3	0	1	0	0	0	0	0	0	25	3	0	0	NA	NA	3.4	0	0.00926430517711172	0	21.8	13	0.4	0	0.8	0	-Inf	TRUE	FALSE
"1"	112977096	112993976	"+"	"ENSRNOG00000060599_001i"	"ENSRNOG00000060599"	"Gabrb3"	16880	0	0	0	0	0	0	0	0	0	6	0	0	0	0	0	0	0	0	0	0	0	0	0	0	0	0	0	0	0	0	0	0	0	0	0	0	0	0	0	0	0	0	0	0	0	0	0	0	0	0	NA	NA	0	1.2	0	7.10900473933649e-05	0	0	0	0	0	0	Inf	FALSE	FALSE
"1"	112994025	113021853	"+"	"ENSRNOG00000060599_002i"	"ENSRNOG00000060599"	"Gabrb3"	27828	0	2	7	0	0	0	0	1	0	12	0	0	0	0	0	0	0	0	0	0	0	0	0	0	0	0	0	0	0	0	0	0	0	0	0	0	0	0	0	0	0	0	0	0	0	0	0	0	0	0	NA	NA	1.8	2.6	6.46830530401035e-05	9.34310766134828e-05	0	0	0	0	0	0	0.367724780125317	FALSE	FALSE
"1"	113021943	113033097	"+"	"ENSRNOG00000060599_003i"	"ENSRNOG00000060599"	"Gabrb3"	11154	0	0	0	0	0	0	0	0	0	2	23	8	0	0	0	0	0	0	0	0	0	0	0	0	0	0	0	0	0	0	0	0	0	0	0	0	0	0	0	0	0	0	0	0	0	0	1	0	0	0	NA	NA	0	0.4	0	3.58615743231128e-05	0	0	0	0	0	0	Inf	FALSE	FALSE
"1"	113033229	113034226	"+"	"ENSRNOG00000060599_004i"	"ENSRNOG00000060599"	"Gabrb3"	997	0	3	4	9	7	0	0	0	0	0	7	2	0	0	0	0	0	0	0	0	0	0	0	0	0	0	0	8	1	0	0	0	0	0	0	0	0	0	0	0	0	0	0	0	0	0	0	0	0	0	NA	NA	4.6	0	0.00461384152457372	0	0	0	1.8	0	0	0	-Inf	FALSE	FALSE
"1"	113034353	113034548	"+"	"ENSRNOG00000060599_007i"	"ENSRNOG00000060599"	"Gabrb3"	195	0	3	3	2	1	0	0	0	1	0	13	10	32	42	21	22	18	9	14	14	6	7	83	8	0	0	0	0	1	0	0	0	0	0	0	0	0	2	2	2	0	0	0	0	1	0	1	3	0	0	NA	NA	1.8	0.2	0.00923076923076923	0.00102564102564103	27	10	0.2	0	1.2	0.2	-2.19722457733622	FALSE	FALSE
"1"	113034617	113204013	"+"	"ENSRNOG00000060599_008i"	"ENSRNOG00000060599"	"Gabrb3"	169396	8614	10093	11484	19739	16934	33	50	38	306	353	351	6	74	71	75	73	60	29	11	18	14	24	68	20	2	5	6	5	8	0	0	0	0	0	0	1	0	3	2	3	0	0	0	0	0	0	0	0	2	0	206	NA	13372.8	156	0.0789440128456398	0.000920919029965288	70.6	19.2	5.2	0	1.6	0	-4.45112206500406	TRUE	FALSE
"1"	113204235	113225967	"+"	"ENSRNOG00000060599_009i"	"ENSRNOG00000060599"	"Gabrb3"	21732	719	808	879	1785	1418	1	1	1	17	13	30	0	64	125	89	92	66	64	29	66	58	53	44	1	1	1	0	12	2	0	0	0	0	0	0	0	7	3	0	13	10	0	0	0	0	0	0	0	3	0	56	NA	1121.8	6.6	0.0516197312718572	0.000303699613473219	87.2	54	3.2	0	6.6	0	-5.13562016804186	TRUE	FALSE
"1"	113226051	113229267	"+"	"ENSRNOG00000060599_010i"	"ENSRNOG00000060599"	"Gabrb3"	3216	114	93	87	129	112	0	0	0	3	6	62	0	44	28	41	9	21	20	17	23	13	32	134	19	0	2	0	1	1	0	0	0	0	0	0	0	2	0	3	4	0	0	0	0	0	0	4	0	0	0	NA	NA	107	1.8	0.033271144278607	0.000559701492537313	28.6	21	0.8	0	1.8	0	-4.08504216955979	TRUE	FALSE
"1"	113229406	113251990	"+"	"ENSRNOG00000060599_011i"	"ENSRNOG00000060599"	"Gabrb3"	22584	844	1059	1033	2178	1648	0	1	9	32	31	224	0	126	145	121	127	86	64	39	36	42	30	68	14	0	3	0	0	0	0	0	3	0	0	0	0	0	9	2	8	6	0	0	0	2	0	0	0	0	0	35	NA	1352.4	14.6	0.0598831030818279	0.000646475380800567	121	42.2	0.6	0.6	5	0.4	-4.52861454211944	TRUE	FALSE
"1"	113252144	113256144	"+"	"ENSRNOG00000060599_012i"	"ENSRNOG00000060599"	"Gabrb3"	4000	57	47	66	212	173	0	0	0	4	7	8	0	412	562	491	422	415	240	202	198	265	243	108	9	1	4	6	3	1	0	0	0	0	0	0	0	13	2	1	2	8	0	0	0	0	0	0	0	0	0	NA	NA	111	2.2	0.02775	0.00055	460.4	229.6	3	0	5.2	0	-3.92107284094806	TRUE	FALSE
"1"	113256390	113264519	"+"	"ENSRNOG00000060599_013i"	"ENSRNOG00000060599"	"Gabrb3"	8129	130	96	152	283	242	0	0	0	1	8	8	0	41	85	88	17	9	36	30	6	3	4	49	43	0	0	1	0	3	0	0	0	0	0	0	0	6	3	2	2	3	0	0	0	0	0	1	0	0	0	NA	NA	180.6	1.8	0.0222167548283922	0.000221429450116866	48	15.8	0.8	0	3.2	0	-4.60849797608077	TRUE	FALSE
"1"	113419788	113424717	"+"	"ENSRNOG00000021507_001i"	"ENSRNOG00000021507"	"Luzp2"	4929	33	40	42	42	70	0	0	0	1	0	3	1	16	20	23	5	5	7	6	7	0	1	1	3	0	0	0	2	0	0	0	0	0	0	0	0	0	1	0	0	1	0	0	0	0	0	3	0	0	0	NA	NA	45.4	0.2	0.00921079326435382	4.05761817812944e-05	13.8	4.2	0.4	0	0.4	0	-5.4249500174814	TRUE	FALSE
"1"	113424781	113463271	"+"	"ENSRNOG00000021507_002i"	"ENSRNOG00000021507"	"Luzp2"	38490	113	98	125	250	208	0	0	1	1	3	19	0	27	40	41	4	9	25	7	4	0	2	0	0	2	1	2	2	3	0	0	0	0	0	0	0	0	0	1	1	0	0	0	0	0	0	5	0	0	0	NA	NA	158.8	1	0.00412574694725903	2.5980774227072e-05	24.2	7.6	2	0	0.4	0	-5.06764554881304	FALSE	FALSE
"1"	113463347	113468473	"+"	"ENSRNOG00000021507_003i"	"ENSRNOG00000021507"	"Luzp2"	5126	28	28	27	28	37	0	0	0	0	2	5	1	44	28	51	35	29	9	11	20	19	10	9	16	0	0	0	0	0	0	0	0	0	0	0	0	3	0	0	0	3	0	0	0	0	0	0	0	0	0	NA	NA	29.6	0.4	0.00577448302770191	7.80335544284042e-05	37.4	13.8	0	0	1.2	0	-4.30406509320417	TRUE	FALSE
"1"	113468639	113513642	"+"	"ENSRNOG00000021507_004i"	"ENSRNOG00000021507"	"Luzp2"	45003	146	162	188	280	283	0	0	1	3	25	29	5	17	20	18	4	1	32	2	3	0	0	0	0	0	1	3	2	0	0	0	0	0	0	0	0	0	0	1	0	0	0	0	0	0	0	3	1	0	0	NA	NA	211.8	5.8	0.00470635290980601	0.000128880296869098	12	7.4	1.2	0	0.2	0	-3.59778451561493	FALSE	FALSE
"1"	113513736	113526389	"+"	"ENSRNOG00000021507_005i"	"ENSRNOG00000021507"	"Luzp2"	12653	43	34	46	99	84	0	0	0	0	3	6	0	28	39	44	22	20	10	8	7	7	7	3	3	0	0	0	0	0	0	0	0	0	0	0	0	0	0	0	0	0	0	0	0	0	0	0	0	0	0	NA	NA	61.2	0.6	0.00483679759740773	4.74195842883111e-05	30.6	7.8	0	0	0	0	-4.62497281328427	FALSE	FALSE
"1"	113526468	113527366	"+"	"ENSRNOG00000021507_006i"	"ENSRNOG00000021507"	"Luzp2"	898	12	1	4	2	2	0	0	0	0	0	1	5	24	13	27	6	6	3	5	7	1	0	12	0	5	0	4	0	0	0	0	0	0	0	0	0	0	0	0	1	1	0	0	0	0	0	0	0	0	0	NA	NA	4.2	0	0.00467706013363029	0	15.2	3.2	1.8	0	0.4	0	-Inf	FALSE	FALSE
"1"	114046862	114047034	"+"	"ENSRNOG00000021499_001i"	"ENSRNOG00000021499"	"Siglech"	172	0	0	0	0	0	0	0	0	0	0	0	0	0	0	0	0	0	0	0	0	0	0	0	0	0	0	0	0	0	0	0	0	0	0	0	0	0	0	0	0	0	0	0	0	0	0	0	0	0	0	NA	NA	0	0	0	0	0	0	0	0	0	0	NA	FALSE	FALSE
"1"	114047083	114147173	"+"	"ENSRNOG00000021499_002i"	"ENSRNOG00000021499"	"Siglech"	100090	0	0	0	0	3	0	0	2	0	22	3	1	0	0	0	0	0	0	0	0	0	0	0	0	0	0	0	0	0	0	0	0	0	0	0	0	0	0	0	0	0	0	0	0	0	1	0	0	0	0	NA	NA	0.6	4.8	5.99460485562993e-06	4.79568388450395e-05	0	0	0	0	0	0.2	2.07944154167984	FALSE	FALSE
"1"	114147268	114148116	"+"	"ENSRNOG00000021499_003i"	"ENSRNOG00000021499"	"Siglech"	848	0	0	0	0	0	0	0	0	0	3	0	0	0	0	0	0	0	0	0	0	0	0	0	0	0	0	0	0	0	0	0	0	0	0	0	0	0	0	0	0	0	0	0	0	0	0	0	0	0	0	NA	NA	0	0.6	0	0.000707547169811321	0	0	0	0	0	0	Inf	FALSE	FALSE
"1"	114187115	114188534	"+"	"ENSRNOG00000011480_001i"	"ENSRNOG00000011480"	"Tubgcp5"	1419	14	23	15	12	31	0	0	0	0	0	0	0	23	25	10	17	4	0	7	1	1	0	1	1	2	1	5	0	0	0	0	0	0	0	0	0	0	1	0	0	0	0	0	0	0	0	0	0	0	0	NA	NA	19	0	0.0133897110641297	0	15.8	1.8	1.6	0	0.2	0	-Inf	TRUE	FALSE
"1"	114188589	114188676	"+"	"ENSRNOG00000011480_002i"	"ENSRNOG00000011480"	"Tubgcp5"	87	0	0	0	0	0	0	0	0	0	0	0	0	9	9	0	4	1	0	0	0	0	0	7	1	0	0	0	0	0	0	0	0	0	0	0	0	0	0	0	0	0	0	0	0	0	0	0	0	0	0	NA	NA	0	0	0	0	4.6	0	0	0	0	0	NA	FALSE	FALSE
"1"	114188786	114191364	"+"	"ENSRNOG00000011480_003i"	"ENSRNOG00000011480"	"Tubgcp5"	2578	55	51	41	15	37	0	7	0	0	2	0	0	23	13	5	7	4	0	0	2	0	0	8	0	0	0	0	1	0	0	0	0	0	1	0	0	4	0	4	3	2	0	0	0	0	0	0	0	0	0	NA	NA	39.8	1.8	0.0154383242823894	0.000698215671062839	10.4	0.4	0.2	0.2	2.6	0	-3.09608024738827	TRUE	FALSE
"1"	114191462	114192022	"+"	"ENSRNOG00000011480_004i"	"ENSRNOG00000011480"	"Tubgcp5"	560	21	19	5	21	12	0	0	0	0	1	0	0	13	11	7	3	0	21	0	2	0	0	1	1	9	0	3	3	0	0	0	0	0	0	0	0	0	5	1	0	0	0	0	0	0	0	0	0	0	0	NA	NA	15.6	0.2	0.0278571428571429	0.000357142857142857	6.8	4.6	3	0	1.2	0	-4.35670882668959	TRUE	FALSE
"1"	114192103	114193113	"+"	"ENSRNOG00000011480_005i"	"ENSRNOG00000011480"	"Tubgcp5"	1010	11	8	8	43	41	0	0	0	0	0	0	0	37	40	32	7	7	15	9	9	13	7	5	1	0	0	1	1	1	0	0	0	0	0	0	0	3	0	4	1	0	0	0	0	0	0	0	0	0	0	NA	NA	22.2	0	0.021980198019802	0	24.6	10.6	0.6	0	1.6	0	-Inf	TRUE	FALSE
"1"	114193250	114197203	"+"	"ENSRNOG00000011480_006i"	"ENSRNOG00000011480"	"Tubgcp5"	3953	48	55	43	108	92	0	1	1	0	0	0	0	16	6	21	4	2	0	0	3	0	2	7	0	0	0	2	4	4	0	0	0	0	0	0	0	0	0	1	0	0	0	1	0	0	0	0	0	0	0	NA	NA	69.2	0.4	0.0175056918795851	0.000101188970402226	9.8	1	2	0	0.2	0.2	-5.15329159449778	TRUE	FALSE
"1"	114197319	114197906	"+"	"ENSRNOG00000011480_007i"	"ENSRNOG00000011480"	"Tubgcp5"	587	2	0	1	1	1	0	0	0	0	0	0	0	16	14	16	2	3	0	8	6	1	0	8	0	0	0	0	1	1	0	0	0	0	0	0	0	2	0	0	0	0	0	0	0	0	0	0	0	0	0	NA	NA	1	0	0.00170357751277683	0	10.2	3	0.4	0	0.4	0	-Inf	FALSE	FALSE
"1"	114197997	114198742	"+"	"ENSRNOG00000011480_008i"	"ENSRNOG00000011480"	"Tubgcp5"	745	0	1	0	2	0	0	0	0	0	0	0	0	6	4	8	0	1	0	0	5	0	0	2	0	0	0	0	0	0	0	0	0	0	0	0	0	0	0	0	0	0	0	0	0	0	0	0	0	0	0	NA	NA	0.6	0	0.000805369127516779	0	3.8	1	0	0	0	0	-Inf	FALSE	FALSE
"1"	114198837	114199466	"+"	"ENSRNOG00000011480_009i"	"ENSRNOG00000011480"	"Tubgcp5"	629	3	2	5	2	4	0	0	0	0	1	0	0	11	3	4	1	3	7	0	0	0	2	15	0	0	0	0	0	0	0	0	0	0	0	0	0	2	2	2	0	0	0	0	0	0	0	0	0	0	0	NA	NA	3.2	0.2	0.00508744038155803	0.000317965023847377	4.4	1.8	0	0	1.2	0	-2.77258872223978	TRUE	FALSE
"1"	114199714	114201264	"+"	"ENSRNOG00000011480_010i"	"ENSRNOG00000011480"	"Tubgcp5"	1550	14	15	22	28	13	0	0	0	0	0	0	0	0	6	0	2	2	0	0	0	3	0	6	0	0	0	0	0	0	0	0	0	0	0	0	0	0	0	0	0	0	0	0	0	0	0	0	0	0	0	NA	NA	18.4	0	0.0118709677419355	0	2	0.6	0	0	0	0	-Inf	TRUE	FALSE
"1"	114201467	114202943	"+"	"ENSRNOG00000011480_011i"	"ENSRNOG00000011480"	"Tubgcp5"	1476	9	26	31	37	37	4	0	4	5	1	43	1	0	0	1	3	0	0	0	0	4	0	0	0	1	0	0	0	0	0	0	0	0	0	0	0	1	4	3	2	5	0	0	0	0	0	1	0	0	0	NA	NA	28	2.8	0.018970189701897	0.0018970189701897	0.8	0.8	0.2	0	3	0	-2.30258509299405	TRUE	FALSE
"1"	114203061	114203774	"+"	"ENSRNOG00000011480_012i"	"ENSRNOG00000011480"	"Tubgcp5"	713	22	15	12	14	28	0	0	0	0	0	4	0	14	22	9	1	0	7	7	3	10	0	1	0	0	5	3	1	4	0	0	0	0	0	0	0	8	5	1	3	5	0	0	0	0	0	1	0	0	0	NA	NA	18.2	0	0.0255259467040673	0	9.2	5.4	2.6	0	4.4	0	-Inf	TRUE	FALSE
"1"	114204044	114207462	"+"	"ENSRNOG00000011480_013i"	"ENSRNOG00000011480"	"Tubgcp5"	3418	71	104	82	142	136	0	0	0	2	3	17	0	18	15	40	2	7	4	8	0	5	0	0	0	0	3	1	3	3	0	0	0	0	0	0	0	6	9	8	3	2	0	0	0	0	2	0	0	0	0	NA	NA	107	1	0.0313048566413107	0.000292568753657109	16.4	3.4	2	0	5.6	0.4	-4.67282883446191	TRUE	FALSE
"1"	114207662	114208251	"+"	"ENSRNOG00000011480_014i"	"ENSRNOG00000011480"	"Tubgcp5"	589	5	15	9	23	16	0	0	0	0	0	0	0	5	1	2	1	1	0	5	0	0	0	20	0	1	2	2	1	2	0	0	0	0	0	0	0	0	2	2	0	3	0	0	0	0	0	0	0	0	0	NA	NA	13.6	0	0.0230899830220713	0	2	1	1.6	0	1.4	0	-Inf	TRUE	FALSE
"1"	114208441	114209727	"+"	"ENSRNOG00000011480_015i"	"ENSRNOG00000011480"	"Tubgcp5"	1286	18	4	8	61	46	0	0	0	0	0	0	0	6	5	0	6	2	0	0	0	0	0	6	0	0	0	0	39	32	0	0	0	0	0	0	0	0	0	0	0	0	0	0	0	0	0	0	0	0	0	NA	NA	27.4	0	0.0213063763608087	0	3.8	0	14.2	0	0	0	-Inf	TRUE	FALSE
"1"	114209911	114212717	"+"	"ENSRNOG00000011480_016i"	"ENSRNOG00000011480"	"Tubgcp5"	2806	39	76	42	94	104	0	0	0	1	1	21	0	7	11	7	8	10	0	0	1	0	0	3	0	2	0	0	5	1	0	0	0	0	0	0	0	0	0	0	1	0	0	0	0	0	0	0	0	0	0	NA	NA	71	0.4	0.0253029223093371	0.000142551674982181	8.6	0.2	1.6	0	0.2	0	-5.17897060891547	TRUE	FALSE
"1"	114212803	114212906	"+"	"ENSRNOG00000011480_017i"	"ENSRNOG00000011480"	"Tubgcp5"	103	0	0	5	2	4	0	0	0	0	0	0	0	7	2	5	1	1	0	1	0	0	0	19	0	0	0	0	0	0	0	0	0	0	0	0	0	0	0	5	2	4	0	0	0	0	0	0	0	0	0	NA	NA	2.2	0	0.0213592233009709	0	3.2	0.2	0	0	2.2	0	-Inf	FALSE	FALSE
"1"	114213028	114214075	"+"	"ENSRNOG00000011480_018i"	"ENSRNOG00000011480"	"Tubgcp5"	1047	14	5	9	7	4	0	0	0	0	0	0	0	15	23	7	13	10	0	0	0	4	0	16	0	0	0	0	0	0	0	0	0	0	0	0	0	6	0	4	1	1	0	0	0	0	0	0	0	0	0	NA	NA	7.8	0	0.00744985673352436	0	13.6	0.8	0	0	2.4	0	-Inf	TRUE	FALSE
"1"	114214255	114216471	"+"	"ENSRNOG00000011480_019i"	"ENSRNOG00000011480"	"Tubgcp5"	2216	18	16	44	25	37	0	0	0	1	1	0	0	4	5	5	9	0	7	0	4	0	0	16	0	0	0	1	0	0	0	0	0	0	0	0	0	0	0	0	0	0	0	0	0	0	0	0	0	0	0	NA	NA	28	0.4	0.0126353790613718	0.000180505415162455	4.6	2.2	0.2	0	0	0	-4.24849524204936	TRUE	FALSE
[truncated: 48,469,287 more chars]
