# Supplementary material for: Free circular introns with an unusual branchpoint in neuronal projections
Source: eLife. 2019 Nov 7;8:e47809. doi: 10.7554/eLife.47809 (PMC6879206; doi:10.7554/eLife.47809)
Supplement: Figure 6—source data 1. [file elife-47809-fig6-data1.xlsx]

## Sheet: Sheet1
intron_chr	intron_start	intron_end	intron_id	intron_strand	circ_start	circ_end	circ_junc	circ_len	ext_geneid	No. of circ reads in whole cell libraries	No. of circ reads in projection libraries	Distance from 3'ss	5'ss	BP	3'ss	circ_sequence	Intron_sequence
4	145444998	145445289	ENSRNOG00000009414_004i	+	145444997	145445260	C	263	Creld1	109	405	-29	GTGAGGG	CGCCT	CTCACAG	GTGAGGGGCGGGAGGGGCTCACAGACAGGCCCTGGCTTTTACTTGACCAAGAAACAGTTGCATGACAGCCTAGTTGAGAGCCTTCCAAATCTAGATCTGAAGACTTGCCTCTGGGTACCAGGCCCACAGTCTGGGATTGTTTACTCCTCTGCCCAAAGGGCCTTGATCAACTGGTTCCTGGGACATAGGCCCATGTTGAGCTGAATTCCAGATTCGGGGAGAGTAGGAGAAGGCAGCCACTCCCGCACTGTCAGCACCCTCGC	GTGAGGGGCGGGAGGGGCTCACAGACAGGCCCTGGCTTTTACTTGACCAAGAAACAGTTGCATGACAGCCTAGTTGAGAGCCTTCCAAATCTAGATCTGAAGACTTGCCTCTGGGTACCAGGCCCACAGTCTGGGATTGTTTACTCCTCTGCCCAAAGGGCCTTGATCAACTGGTTCCTGGGACATAGGCCCATGTTGAGCTGAATTCCAGATTCGGGGAGAGTAGGAGAAGGCAGCCACTCCCGCACTGTCAGCACCCTCGCCTTTCTGCCTTTCTGCCCCTTACTCACAG
2	207283665	207283950	ENSRNOG00000012946_011i	-	207283685	207283950	C	265	Mov10	11	168	-20	GTGAGGC	GCCCA	GTCTCAG	GTGAGGCTGAAGTGTAATCCCAAGGCCTGTACCGACTCAGGCAGCCCCCGGCATATGTCTGCCGTTGTGTTGCCTCCAGGCCCCTGAGTGTTCCTGCACGTCAACAGTCAGTCACCCAAGGAGGAAGCAGGGAGTTAGAGTCATTATGACTGTTGAGTGTCGCAGACCTGAACTGACCGATATCCAGCACCAAGTTGTCATCTGGACTAGCAGGCGTCTGGGAGGCAAATGCAGTCCGCGTTCCCTGCCACAGAGCACGTCTGCC	GTGAGGCTGAAGTGTAATCCCAAGGCCTGTACCGACTCAGGCAGCCCCCGGCATATGTCTGCCGTTGTGTTGCCTCCAGGCCCCTGAGTGTTCCTGCACGTCAACAGTCAGTCACCCAAGGAGGAAGCAGGGAGTTAGAGTCATTATGACTGTTGAGTGTCGCAGACCTGAACTGACCGATATCCAGCACCAAGTTGTCATCTGGACTAGCAGGCGTCTGGGAGGCAAATGCAGTCCGCGTTCCCTGCCACAGAGCACGTCTGCCCAGACTGTCTTTTTGTCTCAG
5	148226244	148226523	ENSRNOG00000014375_024i	+	148226243	148226500	C	257	Adgrb2	3	38	-23	GTGGCTA	CCCAC	CCCCCAG	GTGGCTAGCCTCTTCTTGCCCTCCCCACCCCCAATGCTGGGCTCTGGCTTCTCCCCACTGTGTGGTACAGGGTGACCAGGGTGCTTCAGGCCCTTGGCAAGGGCACTTACAGCTCAGGCAGCCTGAAGACCTGAGCTGCCTTCAGCTCCTTGTCCCTGACATCCCTCAATCCCTGTGTCTCCTTCTATCTCTAGTCTGGGCACCTGGGGTGGGAAACCCTGCCCACTATTGTGGGGTGTCATGGAGGCTTCAGGCCC	GTGGCTAGCCTCTTCTTGCCCTCCCCACCCCCAATGCTGGGCTCTGGCTTCTCCCCACTGTGTGGTACAGGGTGACCAGGGTGCTTCAGGCCCTTGGCAAGGGCACTTACAGCTCAGGCAGCCTGAAGACCTGAGCTGCCTTCAGCTCCTTGTCCCTGACATCCCTCAATCCCTGTGTCTCCTTCTATCTCTAGTCTGGGCACCTGGGGTGGGAAACCCTGCCCACTATTGTGGGGTGTCATGGAGGCTTCAGGCCCACCAGGTGCTTCCTGCCCCCCAG
8	117382118	117382358	ENSRNOG00000020249+ENSRNOG00000020185_015i	-	117382138	117382358	C	220	P4htm	6	22	-20	GTAAGAA	GCCTG	CCTTTAG	GTAAGAACATCCTCACCCCCCTCCCGCCTCCGCGCTGAGCCGCTCGCTCTTTAAGCATTGCCAAGCGGAGCCAGAAGGAACCGTGGCTCAGCTCTGGGCCACCACGCTGCCCCAACGCGCATCACTGTGTGCGGGTCACGCGCGCGCCTACTTACTTTCCTACTGTCGCGCCCTGACACGGGACTTTTCTTGAGCAGTGCGGCCTGGCACACCAGCTGCC	GTAAGAACATCCTCACCCCCCTCCCGCCTCCGCGCTGAGCCGCTCGCTCTTTAAGCATTGCCAAGCGGAGCCAGAAGGAACCGTGGCTCAGCTCTGGGCCACCACGCTGCCCCAACGCGCATCACTGTGTGCGGGTCACGCGCGCGCCTACTTACTTTCCTACTGTCGCGCCCTGACACGGGACTTTTCTTGAGCAGTGCGGCCTGGCACACCAGCTGCCTGCTGTGTACTTTTCCTTTAG
1	221598083	221598440	ENSRNOG00000021025_001i	-	221598100	221598440	C	340	Ppp2r5b	0	8	-17	GTGAGTA	TGCCT	TCCCCAG	GTGAGTACCGGGCAGGAGGCTAGCCACTGGGGAGGGACAGAGAAATAAGAAGGAATCAGACCCTTAGGCTGTGGAGAGAATGAAGAGGACCCCTCCCAGGGTGCTCAGCTGCATCCTGTGTCTGTCCTGTACGAGTACACCCCAGCCATTCTTTTCAGTACCCATGCCCACTGGCTGCTCTGACCCTGTACCAGCGCTTCAGTCAGGACAGCTCAAGACCCAGCTTGCCCTCTCCTCTCCTCTTCTCTAAGCCGAGGGTTCCCCACAGAGTCCTAATCACTTTATAGTGGGGTGGCAGTGAAGGAGCTTAGACTGCAGCTGCCAGAAGAGGAAGAGCTGC	GTGAGTACCGGGCAGGAGGCTAGCCACTGGGGAGGGACAGAGAAATAAGAAGGAATCAGACCCTTAGGCTGTGGAGAGAATGAAGAGGACCCCTCCCAGGGTGCTCAGCTGCATCCTGTGTCTGTCCTGTACGAGTACACCCCAGCCATTCTTTTCAGTACCCATGCCCACTGGCTGCTCTGACCCTGTACCAGCGCTTCAGTCAGGACAGCTCAAGACCCAGCTTGCCCTCTCCTCTCCTCTTCTCTAAGCCGAGGGTTCCCCACAGAGTCCTAATCACTTTATAGTGGGGTGGCAGTGAAGGAGCTTAGACTGCAGCTGCCAGAAGAGGAAGAGCTGCCTCACCCTCTCTCCCCAG
17	76379811	76380067	ENSRNOG00000023278_008i	+	76379810	76380042	C	232	Sec61a2	4	15	-25	GTGAGTG	TTCCT	TTTTCAG	GTGAGTGTGATGTTCTCACTGGTGTAGCAAGGGCAATGCTGTTCAAAAGGGTGGTTTCTAACAAGCGATGTTTCAAGAACCATTCTTTAAACTTGAGTTTGAAGGTGGAAACTATTGCCATAAAATAGAAAAAAACGGGAGGCTCTTGGGAGAGGATACAAGTTCTGCTGCTGGCTTGTCCCACCCCCTCCGCAGCTGCCCTTCCTTCTGTGCGCTCTTTGATATGTAGTTC	GTGAGTGTGATGTTCTCACTGGTGTAGCAAGGGCAATGCTGTTCAAAAGGGTGGTTTCTAACAAGCGATGTTTCAAGAACCATTCTTTAAACTTGAGTTTGAAGGTGGAAACTATTGCCATAAAATAGAAAAAAACGGGAGGCTCTTGGGAGAGGATACAAGTTCTGCTGCTGGCTTGTCCCACCCCCTCCGCAGCTGCCCTTCCTTCTGTGCGCTCTTTGATATGTAGTTCCTCTCACTCTTAATTTCATTTTCAG
19	55237951	55238350	ENSRNOG00000028501_017i	+	55237950	55238328	C	378	Zc3h18	0	19	-22	GTGAGAC	TACCA	GTTTCAG	GTGAGACAGGGGACAGGCCTGCATTCCTGGGCCTGGGTGCTGGGGACCCGGCCCAAGGGACCTCGCACATCCAGGAGTGCAGTCTATGTGCCTGTGCCTGCAGCCTGGCCAGCCTGGTTCCTGACCCCACCCCAGCAGCAGACATCTTCAAAGCTCTGCACATGTCTGGAAGGGCCAAGGCCTGACATGTTGGGATCCTGCAAGGCACTTCCTCATGCAACACAAAGGGCCCCACCACATGGTGGCAAGAGCCACAGAACTGCTTTGGAGGGTCAGGGGTTCAGCCAAGAGGAGGCTCATGGGAGCAGAGGACCACTCGCCACTATCAGCAGATACACCTCGACCCTCTGCCTGGCCAAACAACCATCCAGGCCCTAC	GTGAGACAGGGGACAGGCCTGCATTCCTGGGCCTGGGTGCTGGGGACCCGGCCCAAGGGACCTCGCACATCCAGGAGTGCAGTCTATGTGCCTGTGCCTGCAGCCTGGCCAGCCTGGTTCCTGACCCCACCCCAGCAGCAGACATCTTCAAAGCTCTGCACATGTCTGGAAGGGCCAAGGCCTGACATGTTGGGATCCTGCAAGGCACTTCCTCATGCAACACAAAGGGCCCCACCACATGGTGGCAAGAGCCACAGAACTGCTTTGGAGGGTCAGGGGTTCAGCCAAGAGGAGGCTCATGGGAGCAGAGGACCACTCGCCACTATCAGCAGATACACCTCGACCCTCTGCCTGGCCAAACAACCATCCAGGCCCTACCACCCTCACTGTGCTGTTTCAG
12	41431404	41431651	ENSRNOG00000001374_010i	-	41431429	41431651	G	222	Rasal1	0	3	-25	GTGAGTA	TAGCC	CCCCCAG	GTGAGTAGAGGGACCCGGCATGTCTGGGTGCAAGTGTCTTCCTCCCCTGCTCACTGGGGCCTCAGAGCCTGCTGGCCTCAAGTGGCACTAGGTGGCTCAGCTGGGTGCTGTGGCAGATGCCTGGCTTCAGCCCTGGGCGCACCCTTGGACACAGCTGGCCTGGCTCTGAAATCTCCCTGCACACCCCCTGCCCCAGCCCAGGGTGTTCCCTGCCACCCTTAG	GTGAGTAGAGGGACCCGGCATGTCTGGGTGCAAGTGTCTTCCTCCCCTGCTCACTGGGGCCTCAGAGCCTGCTGGCCTCAAGTGGCACTAGGTGGCTCAGCTGGGTGCTGTGGCAGATGCCTGGCTTCAGCCCTGGGCGCACCCTTGGACACAGCTGGCCTGGCTCTGAAATCTCCCTGCACACCCCCTGCCCCAGCCCAGGGTGTTCCCTGCCACCCTTAGCCGCTCCGTGTGGCCCCTGCCCCCAG
6	27421121	27421510	ENSRNOG00000009967_048i	+	27421120	27421461	C	341	Otof	0	2	-49	GTGAGTT	TTCCA	GCTCCAG	GTGAGTTCCTGCCTGCCGAGACCCCCAATCACACCATGGGAGCAGAAAAGAGAAGAGGCCCAGACCCTTCTGGTCTTCTTGCCCTTACTCCCTCCCGGCTCACAGCCCCATCATGGGGGAGCCCCTCCTTCAGCCCTGAAGCTACCTCTTCCCTCTAAACCAAAGAAAGCCCATGAGCAAAGAAGGCAGTTCCTTTCCAGGGGAGCCCAGCCACCAAGTCCAATAGTGATATGGGTTCCTCCTAGTTTTTTGACAAGGGCAATGCAAGCACGCCAAAGGTGGCTAGATTTGCTGCTGGCTGTAGGTGGGCTTCCCCGTGACTCTCTCGACAAGCCCCTTTC	GTGAGTTCCTGCCTGCCGAGACCCCCAATCACACCATGGGAGCAGAAAAGAGAAGAGGCCCAGACCCTTCTGGTCTTCTTGCCCTTACTCCCTCCCGGCTCACAGCCCCATCATGGGGGAGCCCCTCCTTCAGCCCTGAAGCTACCTCTTCCCTCTAAACCAAAGAAAGCCCATGAGCAAAGAAGGCAGTTCCTTTCCAGGGGAGCCCAGCCACCAAGTCCAATAGTGATATGGGTTCCTCCTAGTTTTTTGACAAGGGCAATGCAAGCACGCCAAAGGTGGCTAGATTTGCTGCTGGCTGTAGGTGGGCTTCCCCGTGACTCTCTCGACAAGCCCCTTTCCACCCTCCTGTTGTTTCCTTGTGCTCATCTGCCCTTCCCAATGCTCCAG
1	101007080	101007350	ENSRNOG00000056946_007i	-	101007098	101007349	G	251	Scaf1	0	8	-18	GTGAGTA	GAGCC	CTTCCAG	TGAGTAAGGGTGTCCACCAACCTTCATCCTGGGGCCTGCATGACAAAGGAACTGAGGATCTAAACCCTGGGTCTGATGTGACTTTGGCAGGCAGTGACAGGAGTCTGGGGACCAGATCCCTGACTAAGCTGGCTCCCAGAAACCATTAAGATAAGGTTGGTTGGATTCCAGAACGTTGTTGTGGCAGATGGGTGGGTTCCTGAGAGACTGGAACTCGGAAGGTTGTCAGTGTGAGTGCTCACAGAACAGAG	GTGAGTAAGGGTGTCCACCAACCTTCATCCTGGGGCCTGCATGACAAAGGAACTGAGGATCTAAACCCTGGGTCTGATGTGACTTTGGCAGGCAGTGACAGGAGTCTGGGGACCAGATCCCTGACTAAGCTGGCTCCCAGAAACCATTAAGATAAGGTTGGTTGGATTCCAGAACGTTGTTGTGGCAGATGGGTGGGTTCCTGAGAGACTGGAACTCGGAAGGTTGTCAGTGTGAGTGCTCACAGAACAGAGCCCACTTGGCCCCTTCCAG
1	129167031	129167226	ENSRNOG00000014187_009i	+	129167030	129167204	C	174	Igf1r	3	10	-22	GTGAGCT	TCCCA	CAAGCAG	GTGAGCTGGGCTGGCAGCCGGCAGGGCAGTGCCACTGGCCTTGCCTGTTGTCTGAGAGTCCCTGAGCCCCCAGGGTTACACCCGCGTGTGCAGGCCTTGATTCCTGGCAGAGCGCACCAGCCCCCCTCCCCCACTCACAACGCTCCCTGGCACACCGTGGGTGGCTTCCATTCC	GTGAGCTGGGCTGGCAGCCGGCAGGGCAGTGCCACTGGCCTTGCCTGTTGTCTGAGAGTCCCTGAGCCCCCAGGGTTACACCCGCGTGTGCAGGCCTTGATTCCTGGCAGAGCGCACCAGCCCCCCTCCCCCACTCACAACGCTCCCTGGCACACCGTGGGTGGCTTCCATTCCCACTCTATTCTTCTCCAAGCAG
6	137308155	137308415	ENSRNOG00000033688_015i	+	137308154	137308392	C	238	Cep170b	0	10	-23	GTAAGTC	TGCCC	CTCCCAG	GTAAGTCCCTGGGGGCAGAGGTGACAGGTCACGTGTGCTGTGTCTAGCATCCAGGACCACAGCCTGACGGGTCACGAGTAGGTAGCCGCATGCCCACACTCCCACCTGAGCGTCAGAGAGCTAGTCAAGTTCCTGCTCTGGGCTTCAGTTTCTCTCCCGACTCTAGCAAGAGATGGCGTCAGCTTTACTGTGGTGAGAGAAATATGGGGAGCAGCTGTTCTGTGTTCTCTGTCACTGC	GTAAGTCCCTGGGGGCAGAGGTGACAGGTCACGTGTGCTGTGTCTAGCATCCAGGACCACAGCCTGACGGGTCACGAGTAGGTAGCCGCATGCCCACACTCCCACCTGAGCGTCAGAGAGCTAGTCAAGTTCCTGCTCTGGGCTTCAGTTTCTCTCCCGACTCTAGCAAGAGATGGCGTCAGCTTTACTGTGGTGAGAGAAATATGGGGAGCAGCTGTTCTGTGTTCTCTGTCACTGCCCTTGTCCCTGCTCCTCTCCCAG
11	86737883	86738153	ENSRNOG00000001888_002i	-	86737904	86738153	C	249	Arvcf	0	5	-21	GTGAGTG	CTCCG	CCTACAG	GTGAGTGCTGATATGTAGGTGCGACCTCGGGCAAGAGGACCGGGGAGGACCACCTGGTTTCATGGTGTGATCCTGGGCGATGCTGAGAAGGCCTTGCTATGATAAAATGTCAGCTGGAGAAGAGATAGGTGGTCGGTTTGGAGGCTTCAGGACTGGTTGGAGCTGGCACTTAGACCTGAAGTCCCCTGTCCCAGGGCTGAAGGAAGATCACCTATCCTCACGGTGACTTCCCCCGAATTCCACTTACTC	GTGAGTGCTGATATGTAGGTGCGACCTCGGGCAAGAGGACCGGGGAGGACCACCTGGTTTCATGGTGTGATCCTGGGCGATGCTGAGAAGGCCTTGCTATGATAAAATGTCAGCTGGAGAAGAGATAGGTGGTCGGTTTGGAGGCTTCAGGACTGGTTGGAGCTGGCACTTAGACCTGAAGTCCCCTGTCCCAGGGCTGAAGGAAGATCACCTATCCTCACGGTGACTTCCCCCGAATTCCACTTACTCCGTGCTCTGCTCTACCCTACAG
1	36430761	36431062	ENSRNOG00000017613_012i	+	36430760	36431033	C	273	Tent4a/Papd7	4	20	-29	GTGAGTG	CTCCA	CCAGCAG	GTGAGTGTTGCCTGCTGCTGTGCTGCTGTAGCCATGCCAGTGGGCCTGCGCCCTGGAAGAGAGTTcccgtgtgctttttgcttggtggctcagtctctgtgagcccccatggacccaggatggtGTCCTTGACGTGTGAAGAAGCTAGAGGCCTGCAGGGCCCTGAGGGAAGTTCTGTTCAGAGTGAAGGGCCCTCTGCATGTCCTAGCAGTGATATGTGGCTCTGGGTTCTCGCTGTACATTGTGTCTTTTCACCTCACGGTCTGTGTGCTC	GTGAGTGTTGCCTGCTGCTGTGCTGCTGTAGCCATGCCAGTGGGCCTGCGCCCTGGAAGAGAGTTcccgtgtgctttttgcttggtggctcagtctctgtgagcccccatggacccaggatggtGTCCTTGACGTGTGAAGAAGCTAGAGGCCTGCAGGGCCCTGAGGGAAGTTCTGTTCAGAGTGAAGGGCCCTCTGCATGTCCTAGCAGTGATATGTGGCTCTGGGTTCTCGCTGTACATTGTGTCTTTTCACCTCACGGTCTGTGTGCTCCAGCCCTGTTTTCTCTCTCTCTCCAGCAG
3	2131708	2132285	ENSRNOG00000007622_006i	-	2131730	2132285	C	555	Arrdc1	3	7	-22	GTGAGTG	CTCCC	TCTGTAG	GTGAGTGTGGGAGCCAGCAGTGATCATAGGGGCAGCCCTTGACTGGAGGGGGTCAGCCTGTCCCTTCCCTTCCCAGCAACAGTCTCTTGGATTCCCACTTTCTGGTTCTGGGTCTGGGTGGGCTCTGACGCTTTATATGACTGTCTTCATCCCCGTCCTCTACTCTAAACCACCCTCCTGTTTTTTTATTTTAAACTTTGTAttcttttttaagatagggtttcatgcagcccaggctggccttgaacttgctatttaacagaggatgtccttagacttctgattttcctctttccacctcctaggagtgtgctaccatatgtggtttgcatagtccttggaatcgaactaaagcttcgtatgtgctaagcaaacactctaccaactacatttccagcc…	GTGAGTGTGGGAGCCAGCAGTGATCATAGGGGCAGCCCTTGACTGGAGGGGGTCAGCCTGTCCCTTCCCTTCCCAGCAACAGTCTCTTGGATTCCCACTTTCTGGTTCTGGGTCTGGGTGGGCTCTGACGCTTTATATGACTGTCTTCATCCCCGTCCTCTACTCTAAACCACCCTCCTGTTTTTTTATTTTAAACTTTGTAttcttttttaagatagggtttcatgcagcccaggctggccttgaacttgctatttaacagaggatgtccttagacttctgattttcctctttccacctcctaggagtgtgctaccatatgtggtttgcatagtccttggaatcgaactaaagcttcgtatgtgctaagcaaacactctaccaactacatttccagcc…
20	29510631	29510880	ENSRNOG00000057078_001i	-	29510654	29510880	C	226	Ddit4	0	8	-23	GTGAGTA	TACCC	CTTCCAG	GTGAGTACTGAGCAAGTGCTGAATTGGAGGTGGGGACGAAGCGAGCTGAACCGGATTAAAGCCACCTTAGTTTCCCAATCCACAGCACGAAAAAACAGATTATCCCAGGGTTAGAAGGCACAAGAGTGGGATGGAAACTGAGGCTCGGAATGGGAAGGAACGCCGTTTTCTTAGTAAAACTGCACCTCCCCCTCCCGTACAGCTCCTTTGGAAGGCGCTCTAATAC	GTGAGTACTGAGCAAGTGCTGAATTGGAGGTGGGGACGAAGCGAGCTGAACCGGATTAAAGCCACCTTAGTTTCCCAATCCACAGCACGAAAAAACAGATTATCCCAGGGTTAGAAGGCACAAGAGTGGGATGGAAACTGAGGCTCGGAATGGGAAGGAACGCCGTTTTCTTAGTAAAACTGCACCTCCCCCTCCCGTACAGCTCCTTTGGAAGGCGCTCTAATACCCTTCCCTGTGTTCTCTCTTCCAG
10	91280415	91280719	ENSRNOG00000003207_027i	+	91280414	91280662	C	248	Fmnl1	7	76	-57	GTGAGAG	TACCT	ACCTCAG	GTGAGAGCTTCGTCTGGTCTGTCCTGTCTCCAGTCTCGACCACATCCTCCTCTTCCTGAATTTCTCCCCATCCTGAGGGGTCTGCTGCCTCCTCCCATTCCAtctcattgtgcagccctggcttgcccagaaacttgctgtgtagaccaggctggccttaaacgcacagagatcctcttgcctctgcccctgcagagctgggatcaaaggtacgggccaccatgcctgTTCTGCATACCTCTTGCTAC	GTGAGAGCTTCGTCTGGTCTGTCCTGTCTCCAGTCTCGACCACATCCTCCTCTTCCTGAATTTCTCCCCATCCTGAGGGGTCTGCTGCCTCCTCCCATTCCAtctcattgtgcagccctggcttgcccagaaacttgctgtgtagaccaggctggccttaaacgcacagagatcctcttgcctctgcccctgcagagctgggatcaaaggtacgggccaccatgcctgTTCTGCATACCTCTTGCTACCTTTTCTGCTTTTCTTTTTTTTTTCTCTCTCTCTACCTTCTATCCCCCAAACCTCAG
